# Supplementary material for: Social complexity, life-history and lineage influence the molecular basis of caste in a major transition in evolution
Source: Research Square preprint supplement (doi:10.21203/rs.3.rs-835604/v1), 2021-08-27
Supplement: Supplementary file 2 [file 3c87b20fc09a4307b8560a67.xlsx]

## Sheet: Sheet2
Original	Vespa_crabro	Vespula_vulgaris	Agelaia_cajannensis	Polistes_canadensis_EMILY	Angiopolybia_pallens	Metapolybia_cingulata	Mischocyttarus_basimacula	Polybia_quadracincta	Brachygastra_mellifica	Original	Vespa_crabro	Vespula_vulgaris	Agelaia_cajannensis	Polistes_canadensis_EMILY	Angiopolybia_pallens	Metapolybia_cingulata	Mischocyttarus_basimacula	Polybia_quadracincta	Brachygastra_mellifica	Single copy	3mer	Vespa_crabro	Vespula_vulgaris	Agelaia_cajannensis	Polistes_canadensis_EMILY	Angiopolybia_pallens	Metapolybia_cingulata	Mischocyttarus_basimacula	Polybia_quadracincta	Brachygastra_mellifica	3mer	Vespa_crabro	Vespula_vulgaris	Agelaia_cajannensis	Polistes_canadensis_EMILY	Angiopolybia_pallens	Metapolybia_cingulata	Mischocyttarus_basimacula	Polybia_quadracincta	Brachygastra_mellifica	Single copy	3mer2NA	Agelaia_cajannensis	Angiopolybia_pallens	Brachygastra_mellifica	Metapolybia_cingulata	Mischocyttarus_basimacula	Polistes_canadensis_EMILY	Polybia_quadracincta
OG0000147	TRINITY_DN3293_c1_g2, TRINITY_DN3633_c0_g1, TRINITY_DN5296_c0_g1	TRINITY_DN22585_c2_g1, TRINITY_DN22962_c1_g1, TRINITY_DN23300_c2_g2	TRINITY_DN1271_c3_g1, TRINITY_DN6062_c1_g1, TRINITY_DN6102_c0_g1	TRINITY_DN13368_c6_g1, TRINITY_DN15090_c7_g2, TRINITY_DN17488_c5_g1	TRINITY_DN17454_c0_g5, TRINITY_DN17495_c4_g1, TRINITY_DN19258_c1_g2	TRINITY_DN22447_c7_g1, TRINITY_DN22827_c9_g1, TRINITY_DN24938_c2_g1	TRINITY_DN17845_c0_g1, TRINITY_DN18128_c9_g1, TRINITY_DN24915_c8_g1	TRINITY_DN17043_c0_g1, TRINITY_DN19797_c2_g2	TRINITY_DN43934_c0_g1, TRINITY_DN45127_c0_g1, TRINITY_DN47878_c0_g1	OG0000147	3	3	3	3	3	3	3	2	3	0	OG0000147	TRINITY_DN3293_c1_g2	TRINITY_DN22585_c2_g1	TRINITY_DN6102_c0_g1	TRINITY_DN17488_c5_g1	TRINITY_DN17495_c4_g1	TRINITY_DN24938_c2_g1	TRINITY_DN18128_c9_g1	TRINITY_DN19797_c2_g2	TRINITY_DN43934_c0_g1	OG0000147	1	1	1	1	1	1	1	1	1	1	OG0000147	TRINITY_DN6102_c0_g1	TRINITY_DN17495_c4_g1	TRINITY_DN43934_c0_g1	TRINITY_DN24938_c2_g1	TRINITY_DN18128_c9_g1	TRINITY_DN17488_c5_g1	TRINITY_DN19797_c2_g2
OG0000151	TRINITY_DN519_c0_g2, TRINITY_DN615_c4_g2, TRINITY_DN853_c0_g2	TRINITY_DN21622_c10_g2, TRINITY_DN22532_c2_g1, TRINITY_DN23900_c5_g1	TRINITY_DN21_c0_g2, TRINITY_DN21_c0_g3, TRINITY_DN643_c0_g4	TRINITY_DN18118_c2_g1, TRINITY_DN19708_c4_g2	TRINITY_DN17740_c9_g1, TRINITY_DN19580_c7_g3, TRINITY_DN19594_c4_g1	TRINITY_DN23047_c5_g1, TRINITY_DN23631_c3_g1, TRINITY_DN24425_c7_g1	TRINITY_DN23004_c7_g1, TRINITY_DN24281_c2_g1, TRINITY_DN25202_c6_g1	TRINITY_DN19343_c1_g1, TRINITY_DN21206_c11_g1, TRINITY_DN21220_c1_g1	TRINITY_DN45972_c3_g2, TRINITY_DN48356_c1_g1, TRINITY_DN48544_c3_g1	OG0000151	3	3	3	2	3	3	3	3	3	0	OG0000151	TRINITY_DN853_c0_g2	TRINITY_DN23900_c5_g1	TRINITY_DN21_c0_g2	TRINITY_DN19708_c4_g2	TRINITY_DN19580_c7_g3	TRINITY_DN23047_c5_g1	TRINITY_DN24281_c2_g1	TRINITY_DN21220_c1_g1	TRINITY_DN48356_c1_g1	OG0000151	1	1	1	1	1	1	1	1	1	1	OG0000151	TRINITY_DN21_c0_g2	TRINITY_DN19580_c7_g3	TRINITY_DN48356_c1_g1	TRINITY_DN23047_c5_g1	TRINITY_DN24281_c2_g1	TRINITY_DN19708_c4_g2	TRINITY_DN21220_c1_g1
OG0000157	TRINITY_DN12325_c3_g1, TRINITY_DN1373_c1_g3, TRINITY_DN191_c1_g3	TRINITY_DN22597_c6_g3, TRINITY_DN22810_c8_g5, TRINITY_DN22837_c8_g10	TRINITY_DN5383_c2_g1, TRINITY_DN6464_c5_g1, TRINITY_DN7752_c0_g3	TRINITY_DN14451_c8_g1, TRINITY_DN15588_c5_g1, TRINITY_DN18141_c10_g2	TRINITY_DN17086_c3_g1, TRINITY_DN17127_c5_g7	TRINITY_DN21834_c8_g9, TRINITY_DN21971_c5_g5, TRINITY_DN24711_c6_g1	TRINITY_DN22533_c7_g1, TRINITY_DN23631_c8_g1, TRINITY_DN24400_c3_g1	TRINITY_DN17633_c4_g5, TRINITY_DN18467_c2_g4, TRINITY_DN19647_c1_g8	TRINITY_DN45819_c4_g1, TRINITY_DN48113_c4_g1, TRINITY_DN48522_c1_g2	OG0000157	3	3	3	3	2	3	3	3	3	0	OG0000157	TRINITY_DN191_c1_g3	TRINITY_DN22837_c8_g10	TRINITY_DN5383_c2_g1	TRINITY_DN14451_c8_g1	TRINITY_DN17086_c3_g1	TRINITY_DN21834_c8_g9	TRINITY_DN24400_c3_g1	TRINITY_DN18467_c2_g4	TRINITY_DN48522_c1_g2	OG0000157	1	1	1	1	1	1	1	1	1	1	OG0000157	TRINITY_DN5383_c2_g1	TRINITY_DN17086_c3_g1	TRINITY_DN48522_c1_g2	TRINITY_DN21834_c8_g9	TRINITY_DN24400_c3_g1	TRINITY_DN14451_c8_g1	TRINITY_DN18467_c2_g4
OG0000178	TRINITY_DN2273_c1_g2, TRINITY_DN2676_c1_g3, TRINITY_DN5284_c1_g2	TRINITY_DN20726_c5_g2, TRINITY_DN20976_c3_g1	TRINITY_DN1176_c6_g1, TRINITY_DN3220_c1_g2, TRINITY_DN698_c0_g1	TRINITY_DN12949_c7_g2, TRINITY_DN17705_c7_g1, TRINITY_DN20691_c11_g1	TRINITY_DN16914_c2_g2, TRINITY_DN16936_c2_g1	TRINITY_DN23154_c6_g2, TRINITY_DN24004_c3_g2, TRINITY_DN24607_c3_g1	TRINITY_DN23235_c5_g3, TRINITY_DN24822_c9_g1	TRINITY_DN18879_c5_g1, TRINITY_DN19870_c7_g2, TRINITY_DN20574_c1_g1	TRINITY_DN40524_c0_g1, TRINITY_DN44932_c2_g1, TRINITY_DN46949_c2_g2	OG0000178	3	2	3	3	2	3	2	3	3	0	OG0000178	TRINITY_DN2273_c1_g2	TRINITY_DN20976_c3_g1	TRINITY_DN3220_c1_g2	TRINITY_DN20691_c11_g1	TRINITY_DN16914_c2_g2	TRINITY_DN23154_c6_g2	TRINITY_DN24822_c9_g1	TRINITY_DN19870_c7_g2	TRINITY_DN46949_c2_g2	OG0000178	1	1	1	1	1	1	1	1	1	1	OG0000178	TRINITY_DN3220_c1_g2	TRINITY_DN16914_c2_g2	TRINITY_DN46949_c2_g2	TRINITY_DN23154_c6_g2	TRINITY_DN24822_c9_g1	TRINITY_DN20691_c11_g1	TRINITY_DN19870_c7_g2
OG0000179	TRINITY_DN1624_c7_g1, TRINITY_DN253_c2_g1, TRINITY_DN4078_c0_g3	TRINITY_DN20405_c3_g1, TRINITY_DN22745_c4_g1, TRINITY_DN23842_c1_g3	TRINITY_DN1263_c1_g2, TRINITY_DN8795_c1_g1	TRINITY_DN17326_c5_g1, TRINITY_DN17973_c9_g1, TRINITY_DN19260_c6_g1	TRINITY_DN16200_c9_g1, TRINITY_DN16514_c6_g3, TRINITY_DN16687_c3_g5	TRINITY_DN23253_c5_g2, TRINITY_DN24736_c6_g1	TRINITY_DN19978_c4_g1, TRINITY_DN23951_c3_g3	TRINITY_DN19135_c10_g1, TRINITY_DN19135_c10_g3, TRINITY_DN19162_c5_g2	TRINITY_DN44215_c9_g2, TRINITY_DN46420_c5_g1, TRINITY_DN48197_c0_g2	OG0000179	3	3	2	3	3	2	2	3	3	0	OG0000179	TRINITY_DN253_c2_g1	TRINITY_DN22745_c4_g1	TRINITY_DN1263_c1_g2	TRINITY_DN19260_c6_g1	TRINITY_DN16514_c6_g3	TRINITY_DN23253_c5_g2	TRINITY_DN23951_c3_g3	TRINITY_DN19135_c10_g1	TRINITY_DN48197_c0_g2	OG0000179	1	1	1	1	1	1	1	1	1	1	OG0000179	TRINITY_DN1263_c1_g2	TRINITY_DN16514_c6_g3	TRINITY_DN48197_c0_g2	TRINITY_DN23253_c5_g2	TRINITY_DN23951_c3_g3	TRINITY_DN19260_c6_g1	TRINITY_DN19135_c10_g1
OG0000195	TRINITY_DN2981_c0_g1, TRINITY_DN364_c0_g1	TRINITY_DN21323_c1_g1, TRINITY_DN23623_c9_g1	TRINITY_DN10827_c1_g1, TRINITY_DN10_c2_g1, TRINITY_DN2093_c0_g1	TRINITY_DN15615_c7_g1, TRINITY_DN21318_c4_g1	TRINITY_DN17827_c5_g4, TRINITY_DN18444_c5_g1	TRINITY_DN22086_c0_g1, TRINITY_DN23197_c7_g2, TRINITY_DN23626_c7_g1	TRINITY_DN19202_c1_g2, TRINITY_DN19669_c7_g1, TRINITY_DN23577_c7_g1	TRINITY_DN16672_c0_g1, TRINITY_DN18693_c2_g2, TRINITY_DN19309_c2_g4	TRINITY_DN41312_c0_g1, TRINITY_DN46383_c0_g1, TRINITY_DN46935_c1_g1	OG0000195	2	2	3	2	2	3	3	3	3	0	OG0000195	TRINITY_DN364_c0_g1	TRINITY_DN23623_c9_g1	TRINITY_DN10_c2_g1	TRINITY_DN21318_c4_g1	TRINITY_DN18444_c5_g1	TRINITY_DN23626_c7_g1	TRINITY_DN23577_c7_g1	TRINITY_DN19309_c2_g4	TRINITY_DN46383_c0_g1	OG0000195	1	1	1	1	1	1	1	1	1	1	OG0000195	TRINITY_DN10_c2_g1	TRINITY_DN18444_c5_g1	TRINITY_DN46383_c0_g1	TRINITY_DN23626_c7_g1	TRINITY_DN23577_c7_g1	TRINITY_DN21318_c4_g1	TRINITY_DN19309_c2_g4
OG0000201	TRINITY_DN2637_c0_g3, TRINITY_DN612_c0_g3	TRINITY_DN21016_c4_g1, TRINITY_DN23650_c13_g1, TRINITY_DN40735_c0_g1	TRINITY_DN1391_c0_g2, TRINITY_DN408_c7_g2	TRINITY_DN12855_c5_g2, TRINITY_DN14282_c4_g4, TRINITY_DN14763_c5_g1	TRINITY_DN17904_c2_g7, TRINITY_DN19198_c1_g18	TRINITY_DN21596_c9_g1, TRINITY_DN22645_c4_g1, TRINITY_DN22645_c4_g2	TRINITY_DN20850_c10_g1, TRINITY_DN23918_c6_g1	TRINITY_DN18563_c5_g3, TRINITY_DN19268_c4_g8, TRINITY_DN19465_c3_g4	TRINITY_DN38769_c0_g1, TRINITY_DN40075_c0_g1, TRINITY_DN44206_c6_g1	OG0000201	2	3	2	3	2	3	2	3	3	0	OG0000201	TRINITY_DN612_c0_g3	TRINITY_DN21016_c4_g1	TRINITY_DN1391_c0_g2	TRINITY_DN14282_c4_g4	TRINITY_DN17904_c2_g7	TRINITY_DN22645_c4_g1	TRINITY_DN20850_c10_g1	TRINITY_DN19268_c4_g8	TRINITY_DN44206_c6_g1	OG0000201	1	1	1	1	1	1	1	1	1	1	OG0000201	TRINITY_DN1391_c0_g2	TRINITY_DN17904_c2_g7	TRINITY_DN44206_c6_g1	TRINITY_DN22645_c4_g1	TRINITY_DN20850_c10_g1	TRINITY_DN14282_c4_g4	TRINITY_DN19268_c4_g8
OG0000204	TRINITY_DN210_c1_g2, TRINITY_DN2116_c1_g1, TRINITY_DN4362_c0_g2	TRINITY_DN17025_c0_g2, TRINITY_DN22250_c5_g3	TRINITY_DN1893_c0_g3, TRINITY_DN299_c1_g1, TRINITY_DN33_c0_g5	TRINITY_DN13484_c5_g1, TRINITY_DN18030_c12_g1	TRINITY_DN17261_c11_g1, TRINITY_DN19666_c4_g3, TRINITY_DN8304_c0_g2	TRINITY_DN23702_c7_g4, TRINITY_DN24791_c10_g1	TRINITY_DN18585_c5_g3, TRINITY_DN18968_c8_g5, TRINITY_DN24878_c6_g1	TRINITY_DN19007_c8_g1, TRINITY_DN21293_c0_g1	TRINITY_DN42126_c0_g1, TRINITY_DN42632_c9_g1, TRINITY_DN42812_c5_g1	OG0000204	3	2	3	2	3	2	3	2	3	0	OG0000204	TRINITY_DN2116_c1_g1	TRINITY_DN22250_c5_g3	TRINITY_DN33_c0_g5	TRINITY_DN13484_c5_g1	TRINITY_DN19666_c4_g3	TRINITY_DN24791_c10_g1	TRINITY_DN18585_c5_g3	TRINITY_DN21293_c0_g1	TRINITY_DN42812_c5_g1	OG0000204	1	1	1	1	1	1	1	1	1	1	OG0000204	TRINITY_DN33_c0_g5	TRINITY_DN19666_c4_g3	TRINITY_DN42812_c5_g1	TRINITY_DN24791_c10_g1	TRINITY_DN18585_c5_g3	TRINITY_DN13484_c5_g1	TRINITY_DN21293_c0_g1
OG0000205	TRINITY_DN3358_c1_g1, TRINITY_DN520_c12_g2, TRINITY_DN6115_c2_g1	TRINITY_DN18727_c5_g1, TRINITY_DN25974_c0_g1, TRINITY_DN39592_c0_g1	TRINITY_DN208_c1_g1, TRINITY_DN6528_c0_g1	TRINITY_DN17756_c9_g1, TRINITY_DN18898_c1_g2	TRINITY_DN15540_c0_g1, TRINITY_DN15729_c0_g1, TRINITY_DN16499_c1_g1	TRINITY_DN22782_c0_g1, TRINITY_DN23261_c8_g1	TRINITY_DN18132_c0_g1, TRINITY_DN20957_c6_g1, TRINITY_DN22689_c0_g1	TRINITY_DN16502_c0_g1, TRINITY_DN16871_c0_g1, TRINITY_DN20516_c2_g4	TRINITY_DN41211_c0_g1, TRINITY_DN45065_c2_g2	OG0000205	3	3	2	2	3	2	3	3	2	0	OG0000205	TRINITY_DN3358_c1_g1	TRINITY_DN18727_c5_g1	TRINITY_DN208_c1_g1	TRINITY_DN18898_c1_g2	TRINITY_DN16499_c1_g1	TRINITY_DN22782_c0_g1	TRINITY_DN22689_c0_g1	TRINITY_DN16502_c0_g1	TRINITY_DN45065_c2_g2	OG0000205	1	1	1	1	1	1	1	1	1	1	OG0000205	TRINITY_DN208_c1_g1	TRINITY_DN16499_c1_g1	TRINITY_DN45065_c2_g2	TRINITY_DN22782_c0_g1	TRINITY_DN22689_c0_g1	TRINITY_DN18898_c1_g2	TRINITY_DN16502_c0_g1
OG0000217	TRINITY_DN13665_c1_g1, TRINITY_DN3104_c1_g2	TRINITY_DN21830_c2_g1	TRINITY_DN1070_c0_g2, TRINITY_DN1070_c0_g3, TRINITY_DN1827_c4_g1	TRINITY_DN11105_c0_g1, TRINITY_DN20497_c11_g1	TRINITY_DN14922_c0_g1, TRINITY_DN15323_c0_g1	TRINITY_DN20387_c0_g1, TRINITY_DN23376_c5_g2, TRINITY_DN35965_c0_g1	TRINITY_DN18103_c6_g4, TRINITY_DN20502_c4_g1, TRINITY_DN3712_c0_g1	TRINITY_DN13985_c0_g1, TRINITY_DN30549_c0_g1, TRINITY_DN40495_c0_g1	TRINITY_DN45576_c10_g1, TRINITY_DN46555_c2_g1, TRINITY_DN61924_c0_g1	OG0000217	2	1	3	2	2	3	3	3	3	0	OG0000217	TRINITY_DN3104_c1_g2	TRINITY_DN21830_c2_g1	TRINITY_DN1070_c0_g2	TRINITY_DN20497_c11_g1	TRINITY_DN15323_c0_g1	TRINITY_DN35965_c0_g1	TRINITY_DN18103_c6_g4	TRINITY_DN13985_c0_g1	TRINITY_DN61924_c0_g1	OG0000217	1	1	1	1	1	1	1	1	1	1	OG0000217	TRINITY_DN1070_c0_g2	TRINITY_DN15323_c0_g1	TRINITY_DN61924_c0_g1	TRINITY_DN35965_c0_g1	TRINITY_DN18103_c6_g4	TRINITY_DN20497_c11_g1	TRINITY_DN13985_c0_g1
OG0000225	TRINITY_DN2413_c1_g1, TRINITY_DN5782_c0_g2	TRINITY_DN18174_c5_g1, TRINITY_DN20237_c10_g1, TRINITY_DN22379_c4_g2	TRINITY_DN3_c0_g3, TRINITY_DN4054_c0_g2, TRINITY_DN997_c0_g1	TRINITY_DN13055_c11_g1, TRINITY_DN18377_c3_g1, TRINITY_DN19443_c5_g3	TRINITY_DN17674_c8_g8, TRINITY_DN19025_c2_g1	TRINITY_DN21970_c7_g1, TRINITY_DN22966_c6_g2	TRINITY_DN18226_c9_g2, TRINITY_DN24428_c0_g1	TRINITY_DN17988_c7_g1, TRINITY_DN20241_c3_g1	TRINITY_DN46175_c1_g4, TRINITY_DN46709_c3_g1, TRINITY_DN46714_c0_g1	OG0000225	2	3	3	3	2	2	2	2	3	0	OG0000225	TRINITY_DN5782_c0_g2	TRINITY_DN20237_c10_g1	TRINITY_DN3_c0_g3	TRINITY_DN19443_c5_g3	TRINITY_DN17674_c8_g8	TRINITY_DN21970_c7_g1	TRINITY_DN24428_c0_g1	TRINITY_DN17988_c7_g1	TRINITY_DN46175_c1_g4	OG0000225	1	1	1	1	1	1	1	1	1	1	OG0000225	TRINITY_DN3_c0_g3	TRINITY_DN17674_c8_g8	TRINITY_DN46175_c1_g4	TRINITY_DN21970_c7_g1	TRINITY_DN24428_c0_g1	TRINITY_DN19443_c5_g3	TRINITY_DN17988_c7_g1
OG0000227	TRINITY_DN1203_c2_g2, TRINITY_DN4624_c0_g2	TRINITY_DN21809_c3_g1, TRINITY_DN23195_c3_g1	TRINITY_DN56_c1_g1, TRINITY_DN88_c1_g1	TRINITY_DN17226_c2_g1, TRINITY_DN17226_c2_g2, TRINITY_DN19552_c3_g1	TRINITY_DN19021_c1_g4, TRINITY_DN19699_c4_g1, TRINITY_DN19699_c4_g3	TRINITY_DN23234_c5_g1, TRINITY_DN24335_c4_g1	TRINITY_DN23171_c3_g3, TRINITY_DN24984_c4_g2, TRINITY_DN24984_c4_g4	TRINITY_DN18215_c0_g1, TRINITY_DN20580_c5_g2, TRINITY_DN20884_c0_g1	TRINITY_DN48177_c1_g1, TRINITY_DN48817_c2_g1	OG0000227	2	2	2	3	3	2	3	3	2	0	OG0000227	TRINITY_DN4624_c0_g2	TRINITY_DN23195_c3_g1	TRINITY_DN56_c1_g1	TRINITY_DN19552_c3_g1	TRINITY_DN19021_c1_g4	TRINITY_DN24335_c4_g1	TRINITY_DN23171_c3_g3	TRINITY_DN20580_c5_g2	TRINITY_DN48177_c1_g1	OG0000227	1	1	1	1	1	1	1	1	1	1	OG0000227	TRINITY_DN56_c1_g1	TRINITY_DN19021_c1_g4	TRINITY_DN48177_c1_g1	TRINITY_DN24335_c4_g1	TRINITY_DN23171_c3_g3	TRINITY_DN19552_c3_g1	TRINITY_DN20580_c5_g2
OG0000235	TRINITY_DN3182_c0_g2, TRINITY_DN5285_c1_g1	TRINITY_DN20363_c6_g1, TRINITY_DN22936_c2_g2, TRINITY_DN22936_c2_g9	TRINITY_DN112_c0_g2, TRINITY_DN391_c4_g3	TRINITY_DN13902_c5_g1, TRINITY_DN16533_c3_g4, TRINITY_DN20271_c9_g2	TRINITY_DN15913_c0_g1, TRINITY_DN16841_c5_g1	TRINITY_DN22860_c3_g1, TRINITY_DN22860_c3_g5, TRINITY_DN23862_c6_g5	TRINITY_DN22762_c6_g1, TRINITY_DN24056_c3_g2	TRINITY_DN14119_c0_g3, TRINITY_DN20765_c9_g3	TRINITY_DN45515_c1_g3, TRINITY_DN48495_c5_g1	OG0000235	2	3	2	3	2	3	2	2	2	0	OG0000235	TRINITY_DN3182_c0_g2	TRINITY_DN22936_c2_g2	TRINITY_DN112_c0_g2	TRINITY_DN16533_c3_g4	TRINITY_DN16841_c5_g1	TRINITY_DN23862_c6_g5	TRINITY_DN24056_c3_g2	TRINITY_DN20765_c9_g3	TRINITY_DN48495_c5_g1	OG0000235	1	1	1	1	1	1	1	1	1	1	OG0000235	TRINITY_DN112_c0_g2	TRINITY_DN16841_c5_g1	TRINITY_DN48495_c5_g1	TRINITY_DN23862_c6_g5	TRINITY_DN24056_c3_g2	TRINITY_DN16533_c3_g4	TRINITY_DN20765_c9_g3
OG0000239	TRINITY_DN2348_c0_g1, TRINITY_DN2367_c0_g3	TRINITY_DN19342_c13_g2, TRINITY_DN21457_c6_g2	TRINITY_DN146_c0_g1, TRINITY_DN1769_c4_g1	TRINITY_DN19003_c5_g1, TRINITY_DN20617_c4_g1	TRINITY_DN17650_c3_g1, TRINITY_DN19287_c7_g1	TRINITY_DN22548_c3_g1, TRINITY_DN24000_c3_g3	TRINITY_DN21108_c5_g3, TRINITY_DN22735_c8_g1, TRINITY_DN24620_c5_g1	TRINITY_DN17718_c7_g2, TRINITY_DN18481_c6_g2, TRINITY_DN21324_c7_g1	TRINITY_DN46645_c4_g4, TRINITY_DN47370_c5_g1, TRINITY_DN48591_c2_g2	OG0000239	2	2	2	2	2	2	3	3	3	0	OG0000239	TRINITY_DN2367_c0_g3	TRINITY_DN19342_c13_g2	TRINITY_DN1769_c4_g1	TRINITY_DN19003_c5_g1	TRINITY_DN17650_c3_g1	TRINITY_DN22548_c3_g1	TRINITY_DN24620_c5_g1	TRINITY_DN21324_c7_g1	TRINITY_DN47370_c5_g1	OG0000239	1	1	1	1	1	1	1	1	1	1	OG0000239	TRINITY_DN1769_c4_g1	TRINITY_DN17650_c3_g1	TRINITY_DN47370_c5_g1	TRINITY_DN22548_c3_g1	TRINITY_DN24620_c5_g1	TRINITY_DN19003_c5_g1	TRINITY_DN21324_c7_g1
OG0000241	TRINITY_DN1020_c3_g4, TRINITY_DN2182_c1_g1, TRINITY_DN3515_c0_g3	TRINITY_DN18139_c3_g2, TRINITY_DN21295_c2_g2, TRINITY_DN21730_c3_g1	TRINITY_DN1606_c0_g2, TRINITY_DN18746_c5_g1, TRINITY_DN357_c6_g1	TRINITY_DN15699_c3_g2	TRINITY_DN16581_c4_g1, TRINITY_DN16758_c1_g1	TRINITY_DN20950_c0_g1, TRINITY_DN23109_c9_g1	TRINITY_DN19931_c2_g1, TRINITY_DN23301_c7_g1	TRINITY_DN12336_c0_g1, TRINITY_DN20025_c3_g1, TRINITY_DN20762_c6_g2	TRINITY_DN46584_c0_g1, TRINITY_DN47410_c0_g1	OG0000241	3	3	3	1	2	2	2	3	2	0	OG0000241	TRINITY_DN3515_c0_g3	TRINITY_DN18139_c3_g2	TRINITY_DN1606_c0_g2	TRINITY_DN15699_c3_g2	TRINITY_DN16581_c4_g1	TRINITY_DN23109_c9_g1	TRINITY_DN19931_c2_g1	TRINITY_DN20025_c3_g1	TRINITY_DN47410_c0_g1	OG0000241	1	1	1	1	1	1	1	1	1	1	OG0000241	TRINITY_DN1606_c0_g2	TRINITY_DN16581_c4_g1	TRINITY_DN47410_c0_g1	TRINITY_DN23109_c9_g1	TRINITY_DN19931_c2_g1	TRINITY_DN15699_c3_g2	TRINITY_DN20025_c3_g1
OG0000245	TRINITY_DN2215_c0_g1, TRINITY_DN5752_c0_g2	TRINITY_DN18110_c6_g4, TRINITY_DN21534_c6_g1	TRINITY_DN2045_c0_g1, TRINITY_DN324_c7_g1	TRINITY_DN17673_c5_g1, TRINITY_DN17752_c9_g2, TRINITY_DN21190_c1_g2	TRINITY_DN17740_c10_g1, TRINITY_DN17791_c3_g1, TRINITY_DN19806_c3_g1	TRINITY_DN22223_c9_g2, TRINITY_DN22403_c4_g1, TRINITY_DN24390_c6_g3	TRINITY_DN20647_c8_g1, TRINITY_DN24686_c4_g1	TRINITY_DN18247_c7_g1, TRINITY_DN19607_c11_g1	TRINITY_DN41735_c10_g1, TRINITY_DN42808_c8_g1	OG0000245	2	2	2	3	3	3	2	2	2	0	OG0000245	TRINITY_DN5752_c0_g2	TRINITY_DN18110_c6_g4	TRINITY_DN324_c7_g1	TRINITY_DN21190_c1_g2	TRINITY_DN19806_c3_g1	TRINITY_DN22403_c4_g1	TRINITY_DN24686_c4_g1	TRINITY_DN19607_c11_g1	TRINITY_DN42808_c8_g1	OG0000245	1	1	1	1	1	1	1	1	1	1	OG0000245	TRINITY_DN324_c7_g1	TRINITY_DN19806_c3_g1	TRINITY_DN42808_c8_g1	TRINITY_DN22403_c4_g1	TRINITY_DN24686_c4_g1	TRINITY_DN21190_c1_g2	TRINITY_DN19607_c11_g1
OG0000257	TRINITY_DN1054_c1_g1, TRINITY_DN826_c3_g2	TRINITY_DN18955_c7_g1, TRINITY_DN23882_c1_g1, TRINITY_DN66122_c0_g1	TRINITY_DN738_c0_g1, TRINITY_DN8132_c0_g1	TRINITY_DN15537_c4_g1, TRINITY_DN15537_c4_g5, TRINITY_DN21152_c5_g1	TRINITY_DN18835_c2_g3, TRINITY_DN18963_c6_g1	TRINITY_DN22534_c14_g1, TRINITY_DN24194_c2_g1	TRINITY_DN22713_c5_g1, TRINITY_DN24684_c2_g1	TRINITY_DN19475_c4_g1, TRINITY_DN19903_c2_g1	TRINITY_DN48480_c0_g1, TRINITY_DN48527_c4_g1, TRINITY_DN48838_c2_g1	OG0000257	2	3	2	3	2	2	2	2	3	0	OG0000257	TRINITY_DN1054_c1_g1	TRINITY_DN18955_c7_g1	TRINITY_DN738_c0_g1	TRINITY_DN15537_c4_g5	TRINITY_DN18835_c2_g3	TRINITY_DN24194_c2_g1	TRINITY_DN24684_c2_g1	TRINITY_DN19903_c2_g1	TRINITY_DN48480_c0_g1	OG0000257	1	1	1	1	1	1	1	1	1	1	OG0000257	TRINITY_DN738_c0_g1	TRINITY_DN18835_c2_g3	TRINITY_DN48480_c0_g1	TRINITY_DN24194_c2_g1	TRINITY_DN24684_c2_g1	TRINITY_DN15537_c4_g5	TRINITY_DN19903_c2_g1
OG0000267	TRINITY_DN29809_c0_g2, TRINITY_DN3198_c0_g5	TRINITY_DN20381_c9_g2, TRINITY_DN23023_c4_g2, TRINITY_DN47675_c0_g1	TRINITY_DN114_c4_g2, TRINITY_DN1420_c0_g1	TRINITY_DN17044_c6_g3, TRINITY_DN17044_c6_g5, TRINITY_DN19976_c9_g2	TRINITY_DN17763_c0_g1, TRINITY_DN19744_c4_g2	TRINITY_DN21472_c9_g2, TRINITY_DN23925_c0_g1	TRINITY_DN18922_c2_g1, TRINITY_DN19962_c4_g1	TRINITY_DN19872_c4_g1, TRINITY_DN20425_c8_g2	TRINITY_DN45910_c0_g2, TRINITY_DN46923_c1_g1	OG0000267	2	3	2	3	2	2	2	2	2	0	OG0000267	TRINITY_DN29809_c0_g2	TRINITY_DN23023_c4_g2	TRINITY_DN1420_c0_g1	TRINITY_DN17044_c6_g5	TRINITY_DN17763_c0_g1	TRINITY_DN23925_c0_g1	TRINITY_DN19962_c4_g1	TRINITY_DN19872_c4_g1	TRINITY_DN45910_c0_g2	OG0000267	1	1	1	1	1	1	1	1	1	1	OG0000267	TRINITY_DN1420_c0_g1	TRINITY_DN17763_c0_g1	TRINITY_DN45910_c0_g2	TRINITY_DN23925_c0_g1	TRINITY_DN19962_c4_g1	TRINITY_DN17044_c6_g5	TRINITY_DN19872_c4_g1
OG0000276	TRINITY_DN4359_c0_g1, TRINITY_DN5675_c1_g2	TRINITY_DN20783_c4_g1, TRINITY_DN21671_c4_g1	TRINITY_DN18525_c0_g1, TRINITY_DN6927_c0_g2	TRINITY_DN13519_c4_g1, TRINITY_DN16991_c2_g1, TRINITY_DN19354_c6_g1	TRINITY_DN18597_c1_g1, TRINITY_DN19429_c2_g2	TRINITY_DN22784_c1_g1, TRINITY_DN22959_c12_g1	TRINITY_DN20549_c6_g4, TRINITY_DN23927_c3_g1	TRINITY_DN18622_c7_g1, TRINITY_DN18622_c7_g3, TRINITY_DN20201_c3_g1	TRINITY_DN46596_c5_g1, TRINITY_DN48202_c1_g2	OG0000276	2	2	2	3	2	2	2	3	2	0	OG0000276	TRINITY_DN4359_c0_g1	TRINITY_DN20783_c4_g1	TRINITY_DN6927_c0_g2	TRINITY_DN19354_c6_g1	TRINITY_DN18597_c1_g1	TRINITY_DN22959_c12_g1	TRINITY_DN23927_c3_g1	TRINITY_DN18622_c7_g1	TRINITY_DN48202_c1_g2	OG0000276	1	1	1	1	1	1	1	1	1	1	OG0000276	TRINITY_DN6927_c0_g2	TRINITY_DN18597_c1_g1	TRINITY_DN48202_c1_g2	TRINITY_DN22959_c12_g1	TRINITY_DN23927_c3_g1	TRINITY_DN19354_c6_g1	TRINITY_DN18622_c7_g1
OG0000277	TRINITY_DN556_c3_g1	TRINITY_DN18980_c8_g1, TRINITY_DN20314_c5_g2	TRINITY_DN18_c7_g1, TRINITY_DN712_c2_g2	TRINITY_DN13698_c6_g1, TRINITY_DN13698_c6_g2, TRINITY_DN20631_c10_g1	TRINITY_DN18469_c4_g1, TRINITY_DN18540_c8_g1	TRINITY_DN23492_c6_g1, TRINITY_DN23492_c6_g2, TRINITY_DN24687_c9_g1	TRINITY_DN21205_c3_g1, TRINITY_DN23181_c11_g1	TRINITY_DN19502_c5_g1, TRINITY_DN19502_c5_g3, TRINITY_DN20171_c6_g1	TRINITY_DN48077_c8_g1, TRINITY_DN48642_c5_g1	OG0000277	1	2	2	3	2	3	2	3	2	0	OG0000277	TRINITY_DN556_c3_g1	TRINITY_DN20314_c5_g2	TRINITY_DN712_c2_g2	TRINITY_DN20631_c10_g1	TRINITY_DN18540_c8_g1	TRINITY_DN23492_c6_g2	TRINITY_DN21205_c3_g1	TRINITY_DN19502_c5_g3	TRINITY_DN48642_c5_g1	OG0000277	1	1	1	1	1	1	1	1	1	1	OG0000277	TRINITY_DN712_c2_g2	TRINITY_DN18540_c8_g1	TRINITY_DN48642_c5_g1	TRINITY_DN23492_c6_g2	TRINITY_DN21205_c3_g1	TRINITY_DN20631_c10_g1	TRINITY_DN19502_c5_g3
OG0000278	TRINITY_DN1237_c1_g2, TRINITY_DN7946_c1_g1, TRINITY_DN7946_c2_g1	TRINITY_DN22828_c9_g2, TRINITY_DN22828_c9_g3, TRINITY_DN22828_c9_g6	TRINITY_DN19112_c0_g1, TRINITY_DN19112_c3_g1, TRINITY_DN19112_c5_g1	TRINITY_DN18646_c5_g1	TRINITY_DN11532_c0_g1, TRINITY_DN11532_c0_g2, TRINITY_DN15322_c0_g1	TRINITY_DN21197_c0_g1	TRINITY_DN20263_c5_g1, TRINITY_DN23396_c7_g1	TRINITY_DN15422_c0_g1, TRINITY_DN15874_c0_g1, TRINITY_DN21513_c0_g1	TRINITY_DN39584_c0_g1	OG0000278	3	3	3	1	3	1	2	3	1	0	OG0000278	TRINITY_DN7946_c1_g1	TRINITY_DN22828_c9_g3	TRINITY_DN19112_c0_g1	TRINITY_DN18646_c5_g1	TRINITY_DN11532_c0_g1	TRINITY_DN21197_c0_g1	TRINITY_DN20263_c5_g1	TRINITY_DN15422_c0_g1	TRINITY_DN39584_c0_g1	OG0000278	1	1	1	1	1	1	1	1	1	1	OG0000278	TRINITY_DN19112_c0_g1	TRINITY_DN11532_c0_g1	TRINITY_DN39584_c0_g1	TRINITY_DN21197_c0_g1	TRINITY_DN20263_c5_g1	TRINITY_DN18646_c5_g1	TRINITY_DN15422_c0_g1
OG0000283	TRINITY_DN1065_c0_g1, TRINITY_DN357_c0_g2	TRINITY_DN23507_c4_g1, TRINITY_DN40179_c0_g1	TRINITY_DN2171_c0_g2, TRINITY_DN3443_c0_g2, TRINITY_DN4017_c1_g1	TRINITY_DN19438_c7_g4	TRINITY_DN15852_c0_g1, TRINITY_DN17285_c5_g2	TRINITY_DN19952_c0_g1, TRINITY_DN20718_c0_g1, TRINITY_DN22457_c8_g1	TRINITY_DN20144_c3_g1, TRINITY_DN21730_c3_g1, TRINITY_DN22111_c9_g2	TRINITY_DN19830_c7_g1	TRINITY_DN43280_c0_g1, TRINITY_DN45317_c5_g1, TRINITY_DN46646_c0_g1	OG0000283	2	2	3	1	2	3	3	1	3	0	OG0000283	TRINITY_DN1065_c0_g1	TRINITY_DN23507_c4_g1	TRINITY_DN2171_c0_g2	TRINITY_DN19438_c7_g4	TRINITY_DN15852_c0_g1	TRINITY_DN19952_c0_g1	TRINITY_DN20144_c3_g1	TRINITY_DN19830_c7_g1	TRINITY_DN45317_c5_g1	OG0000283	1	1	1	1	1	1	1	1	1	1	OG0000283	TRINITY_DN2171_c0_g2	TRINITY_DN15852_c0_g1	TRINITY_DN45317_c5_g1	TRINITY_DN19952_c0_g1	TRINITY_DN20144_c3_g1	TRINITY_DN19438_c7_g4	TRINITY_DN19830_c7_g1
OG0000289	TRINITY_DN1652_c0_g1, TRINITY_DN7164_c0_g1	TRINITY_DN21855_c5_g1, TRINITY_DN23559_c8_g1	TRINITY_DN3150_c0_g1, TRINITY_DN4279_c0_g2	TRINITY_DN17474_c4_g1, TRINITY_DN21057_c4_g1	TRINITY_DN16748_c6_g1, TRINITY_DN17606_c5_g1, TRINITY_DN17606_c5_g4	TRINITY_DN22257_c7_g1, TRINITY_DN23996_c8_g2, TRINITY_DN24457_c8_g1	TRINITY_DN20086_c6_g1, TRINITY_DN25071_c8_g2	TRINITY_DN19258_c8_g1, TRINITY_DN20489_c1_g1	TRINITY_DN48454_c8_g1, TRINITY_DN48883_c6_g1	OG0000289	2	2	2	2	3	3	2	2	2	0	OG0000289	TRINITY_DN7164_c0_g1	TRINITY_DN23559_c8_g1	TRINITY_DN4279_c0_g2	TRINITY_DN21057_c4_g1	TRINITY_DN16748_c6_g1	TRINITY_DN24457_c8_g1	TRINITY_DN25071_c8_g2	TRINITY_DN20489_c1_g1	TRINITY_DN48883_c6_g1	OG0000289	1	1	1	1	1	1	1	1	1	1	OG0000289	TRINITY_DN4279_c0_g2	TRINITY_DN16748_c6_g1	TRINITY_DN48883_c6_g1	TRINITY_DN24457_c8_g1	TRINITY_DN25071_c8_g2	TRINITY_DN21057_c4_g1	TRINITY_DN20489_c1_g1
OG0000301	TRINITY_DN1975_c2_g3, TRINITY_DN2131_c1_g2	TRINITY_DN20481_c4_g1, TRINITY_DN22106_c4_g2	TRINITY_DN902_c0_g1, TRINITY_DN93_c5_g1	TRINITY_DN12471_c8_g1, TRINITY_DN16596_c3_g1	TRINITY_DN17305_c6_g1, TRINITY_DN18449_c6_g2	TRINITY_DN21858_c6_g1, TRINITY_DN23116_c7_g2, TRINITY_DN23116_c7_g9	TRINITY_DN18005_c1_g1, TRINITY_DN24137_c8_g1, TRINITY_DN24785_c5_g2	TRINITY_DN19776_c8_g2, TRINITY_DN20597_c6_g1	TRINITY_DN45338_c11_g1, TRINITY_DN47275_c7_g1	OG0000301	2	2	2	2	2	3	3	2	2	0	OG0000301	TRINITY_DN2131_c1_g2	TRINITY_DN20481_c4_g1	TRINITY_DN93_c5_g1	TRINITY_DN12471_c8_g1	TRINITY_DN18449_c6_g2	TRINITY_DN21858_c6_g1	TRINITY_DN24137_c8_g1	TRINITY_DN20597_c6_g1	TRINITY_DN47275_c7_g1	OG0000301	1	1	1	1	1	1	1	1	1	1	OG0000301	TRINITY_DN93_c5_g1	TRINITY_DN18449_c6_g2	TRINITY_DN47275_c7_g1	TRINITY_DN21858_c6_g1	TRINITY_DN24137_c8_g1	TRINITY_DN12471_c8_g1	TRINITY_DN20597_c6_g1
OG0000303	TRINITY_DN36212_c2_g1, TRINITY_DN8099_c3_g1	TRINITY_DN18960_c3_g3, TRINITY_DN20671_c8_g1		TRINITY_DN10179_c0_g1, TRINITY_DN17307_c8_g1, TRINITY_DN17731_c6_g5	TRINITY_DN16647_c0_g1, TRINITY_DN5179_c0_g1, TRINITY_DN5179_c0_g2	TRINITY_DN15464_c1_g1, TRINITY_DN21998_c7_g1, TRINITY_DN60597_c0_g1	TRINITY_DN16928_c0_g1, TRINITY_DN17118_c0_g1	TRINITY_DN18132_c6_g2, TRINITY_DN8617_c0_g1	TRINITY_DN26134_c0_g1, TRINITY_DN26416_c0_g1, TRINITY_DN41467_c0_g1	OG0000303	2	2	0	3	3	3	2	2	3	0	OG0000303	TRINITY_DN36212_c2_g1	TRINITY_DN18960_c3_g3		TRINITY_DN17731_c6_g5	TRINITY_DN5179_c0_g1	TRINITY_DN21998_c7_g1	TRINITY_DN16928_c0_g1	TRINITY_DN18132_c6_g2	TRINITY_DN26416_c0_g1	OG0000303	1	1	0	1	1	1	1	1	1	0	OG0000303	TRINITY_UK00000_c0_g1	TRINITY_DN5179_c0_g1	TRINITY_DN26416_c0_g1	TRINITY_DN21998_c7_g1	TRINITY_DN16928_c0_g1	TRINITY_DN17731_c6_g5	TRINITY_DN18132_c6_g2
OG0000306	TRINITY_DN1991_c3_g1, TRINITY_DN2460_c0_g2	TRINITY_DN20543_c2_g1, TRINITY_DN21100_c1_g2	TRINITY_DN1097_c0_g1, TRINITY_DN690_c0_g1	TRINITY_DN18285_c1_g1, TRINITY_DN18639_c3_g1	TRINITY_DN16192_c5_g1, TRINITY_DN18014_c0_g1	TRINITY_DN23295_c4_g1, TRINITY_DN23439_c7_g1	TRINITY_DN24052_c2_g2, TRINITY_DN24545_c5_g2	TRINITY_DN18493_c0_g1, TRINITY_DN21043_c6_g2	TRINITY_DN38507_c0_g1, TRINITY_DN48219_c1_g1, TRINITY_DN48879_c1_g1	OG0000306	2	2	2	2	2	2	2	2	3	0	OG0000306	TRINITY_DN1991_c3_g1	TRINITY_DN21100_c1_g2	TRINITY_DN1097_c0_g1	TRINITY_DN18639_c3_g1	TRINITY_DN16192_c5_g1	TRINITY_DN23295_c4_g1	TRINITY_DN24052_c2_g2	TRINITY_DN21043_c6_g2	TRINITY_DN48879_c1_g1	OG0000306	1	1	1	1	1	1	1	1	1	1	OG0000306	TRINITY_DN1097_c0_g1	TRINITY_DN16192_c5_g1	TRINITY_DN48879_c1_g1	TRINITY_DN23295_c4_g1	TRINITY_DN24052_c2_g2	TRINITY_DN18639_c3_g1	TRINITY_DN21043_c6_g2
OG0000310	TRINITY_DN26144_c0_g3, TRINITY_DN565_c2_g1	TRINITY_DN21013_c6_g1, TRINITY_DN22777_c6_g6	TRINITY_DN13_c14_g2, TRINITY_DN1892_c0_g1	TRINITY_DN14429_c5_g1, TRINITY_DN16752_c5_g4	TRINITY_DN16877_c7_g1, TRINITY_DN16877_c7_g4, TRINITY_DN17507_c8_g2	TRINITY_DN22154_c8_g1, TRINITY_DN22206_c8_g2	TRINITY_DN21583_c4_g1, TRINITY_DN24218_c10_g1	TRINITY_DN18789_c0_g4, TRINITY_DN20312_c5_g2	TRINITY_DN45678_c6_g1, TRINITY_DN48787_c4_g1	OG0000310	2	2	2	2	3	2	2	2	2	0	OG0000310	TRINITY_DN565_c2_g1	TRINITY_DN21013_c6_g1	TRINITY_DN13_c14_g2	TRINITY_DN16752_c5_g4	TRINITY_DN16877_c7_g4	TRINITY_DN22206_c8_g2	TRINITY_DN21583_c4_g1	TRINITY_DN20312_c5_g2	TRINITY_DN48787_c4_g1	OG0000310	1	1	1	1	1	1	1	1	1	1	OG0000310	TRINITY_DN13_c14_g2	TRINITY_DN16877_c7_g4	TRINITY_DN48787_c4_g1	TRINITY_DN22206_c8_g2	TRINITY_DN21583_c4_g1	TRINITY_DN16752_c5_g4	TRINITY_DN20312_c5_g2
OG0000312	TRINITY_DN3447_c1_g1, TRINITY_DN6004_c0_g1	TRINITY_DN21379_c6_g1, TRINITY_DN22394_c5_g1, TRINITY_DN27203_c0_g1	TRINITY_DN14587_c0_g2, TRINITY_DN648_c1_g3	TRINITY_DN19373_c6_g1, TRINITY_DN21219_c8_g1	TRINITY_DN18818_c9_g1, TRINITY_DN18836_c0_g1	TRINITY_DN23465_c4_g1, TRINITY_DN23701_c3_g1	TRINITY_DN19866_c7_g3, TRINITY_DN24272_c1_g1	TRINITY_DN19629_c1_g1, TRINITY_DN20809_c6_g1	TRINITY_DN48293_c1_g1, TRINITY_DN48542_c4_g1	OG0000312	2	3	2	2	2	2	2	2	2	0	OG0000312	TRINITY_DN3447_c1_g1	TRINITY_DN21379_c6_g1	TRINITY_DN648_c1_g3	TRINITY_DN19373_c6_g1	TRINITY_DN18836_c0_g1	TRINITY_DN23701_c3_g1	TRINITY_DN24272_c1_g1	TRINITY_DN20809_c6_g1	TRINITY_DN48293_c1_g1	OG0000312	1	1	1	1	1	1	1	1	1	1	OG0000312	TRINITY_DN648_c1_g3	TRINITY_DN18836_c0_g1	TRINITY_DN48293_c1_g1	TRINITY_DN23701_c3_g1	TRINITY_DN24272_c1_g1	TRINITY_DN19373_c6_g1	TRINITY_DN20809_c6_g1
OG0000313	TRINITY_DN1982_c1_g1, TRINITY_DN760_c0_g1	TRINITY_DN19269_c3_g3, TRINITY_DN22882_c4_g1	TRINITY_DN145_c12_g1, TRINITY_DN5082_c4_g1	TRINITY_DN13442_c4_g4, TRINITY_DN17765_c4_g1, TRINITY_DN18975_c2_g1	TRINITY_DN16260_c4_g6, TRINITY_DN17879_c2_g1	TRINITY_DN23452_c12_g1, TRINITY_DN24649_c5_g1	TRINITY_DN22007_c9_g2, TRINITY_DN24073_c10_g1	TRINITY_DN17549_c12_g1, TRINITY_DN18837_c4_g2	TRINITY_DN44565_c6_g2, TRINITY_DN46287_c1_g1	OG0000313	2	2	2	3	2	2	2	2	2	0	OG0000313	TRINITY_DN760_c0_g1	TRINITY_DN22882_c4_g1	TRINITY_DN145_c12_g1	TRINITY_DN17765_c4_g1	TRINITY_DN17879_c2_g1	TRINITY_DN23452_c12_g1	TRINITY_DN24073_c10_g1	TRINITY_DN18837_c4_g2	TRINITY_DN46287_c1_g1	OG0000313	1	1	1	1	1	1	1	1	1	1	OG0000313	TRINITY_DN145_c12_g1	TRINITY_DN17879_c2_g1	TRINITY_DN46287_c1_g1	TRINITY_DN23452_c12_g1	TRINITY_DN24073_c10_g1	TRINITY_DN17765_c4_g1	TRINITY_DN18837_c4_g2
OG0000314	TRINITY_DN951_c2_g2, TRINITY_DN951_c2_g3	TRINITY_DN18624_c8_g1, TRINITY_DN20394_c3_g1, TRINITY_DN23875_c1_g1	TRINITY_DN1921_c1_g2, TRINITY_DN1921_c1_g3	TRINITY_DN15879_c0_g1, TRINITY_DN15879_c0_g2	TRINITY_DN18034_c5_g6, TRINITY_DN18886_c5_g1	TRINITY_DN22739_c10_g2, TRINITY_DN23808_c7_g1	TRINITY_DN23601_c4_g1, TRINITY_DN25207_c6_g2	TRINITY_DN19385_c3_g1, TRINITY_DN21151_c4_g1	TRINITY_DN48779_c0_g1, TRINITY_DN48842_c1_g1	OG0000314	2	3	2	2	2	2	2	2	2	0	OG0000314	TRINITY_DN951_c2_g2	TRINITY_DN23875_c1_g1	TRINITY_DN1921_c1_g3	TRINITY_DN15879_c0_g2	TRINITY_DN18886_c5_g1	TRINITY_DN23808_c7_g1	TRINITY_DN25207_c6_g2	TRINITY_DN21151_c4_g1	TRINITY_DN48842_c1_g1	OG0000314	1	1	1	1	1	1	1	1	1	1	OG0000314	TRINITY_DN1921_c1_g3	TRINITY_DN18886_c5_g1	TRINITY_DN48842_c1_g1	TRINITY_DN23808_c7_g1	TRINITY_DN25207_c6_g2	TRINITY_DN15879_c0_g2	TRINITY_DN21151_c4_g1
OG0000318	TRINITY_DN186_c0_g1, TRINITY_DN2746_c0_g1	TRINITY_DN19910_c6_g2, TRINITY_DN19910_c6_g3, TRINITY_DN21765_c1_g1	TRINITY_DN236_c6_g2, TRINITY_DN7351_c0_g3	TRINITY_DN15674_c6_g1, TRINITY_DN17313_c2_g1	TRINITY_DN17639_c4_g2, TRINITY_DN19164_c9_g4	TRINITY_DN22210_c0_g1, TRINITY_DN22963_c9_g1	TRINITY_DN20405_c5_g1, TRINITY_DN23694_c2_g1	TRINITY_DN18489_c7_g1, TRINITY_DN20827_c6_g1	TRINITY_DN47377_c2_g1, TRINITY_DN48047_c0_g1	OG0000318	2	3	2	2	2	2	2	2	2	0	OG0000318	TRINITY_DN2746_c0_g1	TRINITY_DN21765_c1_g1	TRINITY_DN236_c6_g2	TRINITY_DN17313_c2_g1	TRINITY_DN17639_c4_g2	TRINITY_DN22963_c9_g1	TRINITY_DN23694_c2_g1	TRINITY_DN18489_c7_g1	TRINITY_DN47377_c2_g1	OG0000318	1	1	1	1	1	1	1	1	1	1	OG0000318	TRINITY_DN236_c6_g2	TRINITY_DN17639_c4_g2	TRINITY_DN47377_c2_g1	TRINITY_DN22963_c9_g1	TRINITY_DN23694_c2_g1	TRINITY_DN17313_c2_g1	TRINITY_DN18489_c7_g1
OG0000319	TRINITY_DN332_c1_g1, TRINITY_DN3433_c0_g2	TRINITY_DN21069_c7_g1, TRINITY_DN56709_c0_g1	TRINITY_DN2424_c0_g2, TRINITY_DN691_c3_g1	TRINITY_DN11802_c0_g1, TRINITY_DN17505_c3_g1	TRINITY_DN16165_c0_g1, TRINITY_DN16714_c7_g1	TRINITY_DN21729_c8_g1, TRINITY_DN42872_c0_g1, TRINITY_DN9892_c0_g1	TRINITY_DN19370_c0_g2, TRINITY_DN24332_c9_g1	TRINITY_DN13166_c0_g1, TRINITY_DN16699_c0_g1	TRINITY_DN43327_c0_g1, TRINITY_DN43759_c0_g1	OG0000319	2	2	2	2	2	3	2	2	2	0	OG0000319	TRINITY_DN332_c1_g1	TRINITY_DN21069_c7_g1	TRINITY_DN2424_c0_g2	TRINITY_DN11802_c0_g1	TRINITY_DN16714_c7_g1	TRINITY_DN9892_c0_g1	TRINITY_DN19370_c0_g2	TRINITY_DN13166_c0_g1	TRINITY_DN43759_c0_g1	OG0000319	1	1	1	1	1	1	1	1	1	1	OG0000319	TRINITY_DN2424_c0_g2	TRINITY_DN16714_c7_g1	TRINITY_DN43759_c0_g1	TRINITY_DN9892_c0_g1	TRINITY_DN19370_c0_g2	TRINITY_DN11802_c0_g1	TRINITY_DN13166_c0_g1
OG0000320	TRINITY_DN18423_c0_g1, TRINITY_DN3104_c0_g2	TRINITY_DN18324_c12_g1, TRINITY_DN18324_c7_g1, TRINITY_DN21752_c3_g1	TRINITY_DN24_c1_g1	TRINITY_DN13446_c3_g1, TRINITY_DN19594_c7_g1	TRINITY_DN17092_c0_g1, TRINITY_DN17981_c5_g1, TRINITY_DN18760_c2_g1	TRINITY_DN23453_c6_g1, TRINITY_DN23453_c6_g2, TRINITY_DN23453_c6_g4	TRINITY_DN23841_c8_g1, TRINITY_DN23841_c8_g4	TRINITY_DN19055_c8_g1	TRINITY_DN48589_c2_g1, TRINITY_DN48589_c2_g2	OG0000320	2	3	1	2	3	3	2	1	2	0	OG0000320	TRINITY_DN3104_c0_g2	TRINITY_DN18324_c7_g1	TRINITY_DN24_c1_g1	TRINITY_DN13446_c3_g1	TRINITY_DN17981_c5_g1	TRINITY_DN23453_c6_g1	TRINITY_DN23841_c8_g1	TRINITY_DN19055_c8_g1	TRINITY_DN48589_c2_g2	OG0000320	1	1	1	1	1	1	1	1	1	1	OG0000320	TRINITY_DN24_c1_g1	TRINITY_DN17981_c5_g1	TRINITY_DN48589_c2_g2	TRINITY_DN23453_c6_g1	TRINITY_DN23841_c8_g1	TRINITY_DN13446_c3_g1	TRINITY_DN19055_c8_g1
OG0000323	TRINITY_DN1433_c1_g2, TRINITY_DN185_c0_g5	TRINITY_DN21950_c2_g6, TRINITY_DN21950_c2_g8, TRINITY_DN23770_c5_g1	TRINITY_DN2622_c1_g1, TRINITY_DN551_c2_g3	TRINITY_DN16237_c12_g1, TRINITY_DN21136_c9_g1	TRINITY_DN17670_c6_g1, TRINITY_DN18990_c5_g3	TRINITY_DN23469_c5_g2, TRINITY_DN24848_c9_g1	TRINITY_DN22454_c4_g1, TRINITY_DN22524_c5_g1	TRINITY_DN18018_c3_g1, TRINITY_DN19698_c3_g1	TRINITY_DN44247_c1_g1, TRINITY_DN48647_c3_g2	OG0000323	2	3	2	2	2	2	2	2	2	0	OG0000323	TRINITY_DN1433_c1_g2	TRINITY_DN23770_c5_g1	TRINITY_DN551_c2_g3	TRINITY_DN21136_c9_g1	TRINITY_DN18990_c5_g3	TRINITY_DN23469_c5_g2	TRINITY_DN22524_c5_g1	TRINITY_DN19698_c3_g1	TRINITY_DN48647_c3_g2	OG0000323	1	1	1	1	1	1	1	1	1	1	OG0000323	TRINITY_DN551_c2_g3	TRINITY_DN18990_c5_g3	TRINITY_DN48647_c3_g2	TRINITY_DN23469_c5_g2	TRINITY_DN22524_c5_g1	TRINITY_DN21136_c9_g1	TRINITY_DN19698_c3_g1
OG0000329	TRINITY_DN7_c0_g1	TRINITY_DN18851_c5_g1, TRINITY_DN20332_c4_g1, TRINITY_DN20813_c6_g1	TRINITY_DN3291_c1_g1	TRINITY_DN16845_c7_g1, TRINITY_DN17073_c5_g1, TRINITY_DN18489_c3_g1	TRINITY_DN17432_c7_g1, TRINITY_DN19685_c5_g1, TRINITY_DN39150_c0_g1	TRINITY_DN21442_c0_g1, TRINITY_DN22265_c4_g2, TRINITY_DN24203_c7_g1	TRINITY_DN23088_c0_g1	TRINITY_DN17644_c0_g1	TRINITY_DN46332_c3_g1, TRINITY_DN47530_c0_g1, TRINITY_DN49024_c5_g2	OG0000329	1	3	1	3	3	3	1	1	3	0	OG0000329	TRINITY_DN7_c0_g1	TRINITY_DN20332_c4_g1	TRINITY_DN3291_c1_g1	TRINITY_DN16845_c7_g1	TRINITY_DN17432_c7_g1	TRINITY_DN24203_c7_g1	TRINITY_DN23088_c0_g1	TRINITY_DN17644_c0_g1	TRINITY_DN49024_c5_g2	OG0000329	1	1	1	1	1	1	1	1	1	1	OG0000329	TRINITY_DN3291_c1_g1	TRINITY_DN17432_c7_g1	TRINITY_DN49024_c5_g2	TRINITY_DN24203_c7_g1	TRINITY_DN23088_c0_g1	TRINITY_DN16845_c7_g1	TRINITY_DN17644_c0_g1
OG0000336	TRINITY_DN1165_c0_g1, TRINITY_DN6424_c0_g2	TRINITY_DN20213_c2_g1	TRINITY_DN41_c3_g1, TRINITY_DN6943_c15_g1	TRINITY_DN19009_c1_g1, TRINITY_DN20218_c5_g1	TRINITY_DN15876_c1_g2, TRINITY_DN19332_c4_g1	TRINITY_DN20588_c0_g2, TRINITY_DN24259_c5_g1	TRINITY_DN18823_c8_g3, TRINITY_DN25280_c11_g1	TRINITY_DN14930_c0_g1, TRINITY_DN19813_c1_g2, TRINITY_DN34750_c0_g1	TRINITY_DN36603_c0_g2, TRINITY_DN39046_c0_g1, TRINITY_DN48729_c0_g1	OG0000336	2	1	2	2	2	2	2	3	3	0	OG0000336	TRINITY_DN1165_c0_g1	TRINITY_DN20213_c2_g1	TRINITY_DN41_c3_g1	TRINITY_DN19009_c1_g1	TRINITY_DN19332_c4_g1	TRINITY_DN24259_c5_g1	TRINITY_DN25280_c11_g1	TRINITY_DN19813_c1_g2	TRINITY_DN48729_c0_g1	OG0000336	1	1	1	1	1	1	1	1	1	1	OG0000336	TRINITY_DN41_c3_g1	TRINITY_DN19332_c4_g1	TRINITY_DN48729_c0_g1	TRINITY_DN24259_c5_g1	TRINITY_DN25280_c11_g1	TRINITY_DN19009_c1_g1	TRINITY_DN19813_c1_g2
OG0000337	TRINITY_DN1618_c2_g4, TRINITY_DN5499_c1_g1	TRINITY_DN21756_c3_g2, TRINITY_DN23414_c0_g4, TRINITY_DN66486_c0_g1	TRINITY_DN43003_c0_g1, TRINITY_DN6722_c0_g2	TRINITY_DN11265_c0_g1, TRINITY_DN20777_c4_g1	TRINITY_DN15416_c0_g1, TRINITY_DN18938_c0_g1	TRINITY_DN17911_c0_g1, TRINITY_DN23214_c1_g2	TRINITY_DN17863_c0_g1, TRINITY_DN20130_c3_g1	TRINITY_DN11923_c0_g1, TRINITY_DN18976_c5_g1	TRINITY_DN44408_c0_g1, TRINITY_DN48368_c0_g1	OG0000337	2	3	2	2	2	2	2	2	2	0	OG0000337	TRINITY_DN1618_c2_g4	TRINITY_DN21756_c3_g2	TRINITY_DN6722_c0_g2	TRINITY_DN11265_c0_g1	TRINITY_DN15416_c0_g1	TRINITY_DN23214_c1_g2	TRINITY_DN20130_c3_g1	TRINITY_DN18976_c5_g1	TRINITY_DN48368_c0_g1	OG0000337	1	1	1	1	1	1	1	1	1	1	OG0000337	TRINITY_DN6722_c0_g2	TRINITY_DN15416_c0_g1	TRINITY_DN48368_c0_g1	TRINITY_DN23214_c1_g2	TRINITY_DN20130_c3_g1	TRINITY_DN11265_c0_g1	TRINITY_DN18976_c5_g1
OG0000342	TRINITY_DN807_c0_g1, TRINITY_DN979_c1_g2	TRINITY_DN20066_c5_g6, TRINITY_DN20527_c6_g1	TRINITY_DN5572_c0_g1, TRINITY_DN665_c3_g1	TRINITY_DN19233_c8_g1, TRINITY_DN20464_c8_g1	TRINITY_DN15044_c0_g1, TRINITY_DN17412_c3_g1	TRINITY_DN17417_c0_g1, TRINITY_DN23979_c9_g8	TRINITY_DN12862_c0_g1, TRINITY_DN23035_c4_g1	TRINITY_DN20438_c1_g1, TRINITY_DN20923_c4_g2, TRINITY_DN21376_c5_g1	TRINITY_DN41751_c0_g1, TRINITY_DN46725_c1_g1	OG0000342	2	2	2	2	2	2	2	3	2	0	OG0000342	TRINITY_DN979_c1_g2	TRINITY_DN20066_c5_g6	TRINITY_DN5572_c0_g1	TRINITY_DN19233_c8_g1	TRINITY_DN15044_c0_g1	TRINITY_DN17417_c0_g1	TRINITY_DN12862_c0_g1	TRINITY_DN21376_c5_g1	TRINITY_DN41751_c0_g1	OG0000342	1	1	1	1	1	1	1	1	1	1	OG0000342	TRINITY_DN5572_c0_g1	TRINITY_DN15044_c0_g1	TRINITY_DN41751_c0_g1	TRINITY_DN17417_c0_g1	TRINITY_DN12862_c0_g1	TRINITY_DN19233_c8_g1	TRINITY_DN21376_c5_g1
OG0000345	TRINITY_DN241_c0_g1, TRINITY_DN4648_c0_g2	TRINITY_DN19010_c5_g1, TRINITY_DN19635_c2_g1, TRINITY_DN19972_c5_g1	TRINITY_DN629_c0_g1, TRINITY_DN7264_c0_g2	TRINITY_DN15102_c0_g1, TRINITY_DN20738_c6_g1	TRINITY_DN19695_c5_g1	TRINITY_DN21314_c0_g1, TRINITY_DN21811_c5_g1	TRINITY_DN19011_c4_g1, TRINITY_DN21475_c4_g1	TRINITY_DN16471_c0_g1, TRINITY_DN20709_c1_g2	TRINITY_DN42445_c0_g1, TRINITY_DN42445_c0_g2, TRINITY_DN45736_c3_g1	OG0000345	2	3	2	2	1	2	2	2	3	0	OG0000345	TRINITY_DN241_c0_g1	TRINITY_DN19972_c5_g1	TRINITY_DN629_c0_g1	TRINITY_DN20738_c6_g1	TRINITY_DN19695_c5_g1	TRINITY_DN21314_c0_g1	TRINITY_DN19011_c4_g1	TRINITY_DN20709_c1_g2	TRINITY_DN42445_c0_g1	OG0000345	1	1	1	1	1	1	1	1	1	1	OG0000345	TRINITY_DN629_c0_g1	TRINITY_DN19695_c5_g1	TRINITY_DN42445_c0_g1	TRINITY_DN21314_c0_g1	TRINITY_DN19011_c4_g1	TRINITY_DN20738_c6_g1	TRINITY_DN20709_c1_g2
OG0000349		TRINITY_DN19815_c7_g2, TRINITY_DN20815_c3_g1, TRINITY_DN30544_c0_g1	TRINITY_DN11331_c0_g1, TRINITY_DN13396_c3_g1	TRINITY_DN15898_c5_g1, TRINITY_DN19592_c14_g1	TRINITY_DN15576_c0_g1, TRINITY_DN18397_c2_g5	TRINITY_DN20880_c0_g1, TRINITY_DN21024_c0_g1	TRINITY_DN19835_c0_g1, TRINITY_DN22106_c8_g2	TRINITY_DN20584_c4_g1, TRINITY_DN20584_c4_g3	TRINITY_DN19714_c0_g1, TRINITY_DN40264_c0_g1, TRINITY_DN42330_c0_g1	OG0000349	0	3	2	2	2	2	2	2	3	0	OG0000349		TRINITY_DN19815_c7_g2	TRINITY_DN13396_c3_g1	TRINITY_DN19592_c14_g1	TRINITY_DN18397_c2_g5	TRINITY_DN21024_c0_g1	TRINITY_DN19835_c0_g1	TRINITY_DN20584_c4_g3	TRINITY_DN19714_c0_g1	OG0000349	0	1	1	1	1	1	1	1	1	0	OG0000349	TRINITY_DN13396_c3_g1	TRINITY_DN18397_c2_g5	TRINITY_DN19714_c0_g1	TRINITY_DN21024_c0_g1	TRINITY_DN19835_c0_g1	TRINITY_DN19592_c14_g1	TRINITY_DN20584_c4_g3
OG0000350	TRINITY_DN2036_c0_g1, TRINITY_DN2725_c0_g3	TRINITY_DN22682_c2_g1, TRINITY_DN22944_c1_g1, TRINITY_DN22944_c1_g4	TRINITY_DN11398_c0_g2, TRINITY_DN2771_c2_g2, TRINITY_DN2771_c8_g1	TRINITY_DN15020_c5_g1, TRINITY_DN16233_c2_g2, TRINITY_DN16233_c2_g5	TRINITY_DN18671_c5_g1, TRINITY_DN18739_c0_g3	TRINITY_DN54143_c0_g1, TRINITY_DN57023_c0_g1	TRINITY_DN21451_c1_g1	TRINITY_DN17082_c0_g1	TRINITY_DN43355_c0_g1	OG0000350	2	3	3	3	2	2	1	1	1	0	OG0000350	TRINITY_DN2725_c0_g3	TRINITY_DN22944_c1_g4	TRINITY_DN2771_c2_g2	TRINITY_DN15020_c5_g1	TRINITY_DN18671_c5_g1	TRINITY_DN57023_c0_g1	TRINITY_DN21451_c1_g1	TRINITY_DN17082_c0_g1	TRINITY_DN43355_c0_g1	OG0000350	1	1	1	1	1	1	1	1	1	1	OG0000350	TRINITY_DN2771_c2_g2	TRINITY_DN18671_c5_g1	TRINITY_DN43355_c0_g1	TRINITY_DN57023_c0_g1	TRINITY_DN21451_c1_g1	TRINITY_DN15020_c5_g1	TRINITY_DN17082_c0_g1
OG0000352	TRINITY_DN4896_c0_g1, TRINITY_DN9799_c0_g2	TRINITY_DN18356_c4_g1, TRINITY_DN19301_c6_g1, TRINITY_DN38704_c0_g1	TRINITY_DN11960_c5_g2, TRINITY_DN31_c7_g1	TRINITY_DN13155_c10_g5	TRINITY_DN14572_c0_g1, TRINITY_DN19299_c2_g2	TRINITY_DN22258_c0_g1, TRINITY_DN23152_c8_g2	TRINITY_DN21039_c4_g1, TRINITY_DN8780_c0_g1	TRINITY_DN18931_c5_g2, TRINITY_DN41935_c0_g1	TRINITY_DN43809_c10_g1, TRINITY_DN47049_c1_g1	OG0000352	2	3	2	1	2	2	2	2	2	0	OG0000352	TRINITY_DN4896_c0_g1	TRINITY_DN19301_c6_g1	TRINITY_DN31_c7_g1	TRINITY_DN13155_c10_g5	TRINITY_DN19299_c2_g2	TRINITY_DN23152_c8_g2	TRINITY_DN21039_c4_g1	TRINITY_DN18931_c5_g2	TRINITY_DN47049_c1_g1	OG0000352	1	1	1	1	1	1	1	1	1	1	OG0000352	TRINITY_DN31_c7_g1	TRINITY_DN19299_c2_g2	TRINITY_DN47049_c1_g1	TRINITY_DN23152_c8_g2	TRINITY_DN21039_c4_g1	TRINITY_DN13155_c10_g5	TRINITY_DN18931_c5_g2
OG0000354	TRINITY_DN1610_c1_g1, TRINITY_DN691_c0_g1	TRINITY_DN21773_c4_g1, TRINITY_DN23415_c5_g2	TRINITY_DN1274_c1_g2, TRINITY_DN253_c1_g2	TRINITY_DN19025_c6_g6, TRINITY_DN19285_c5_g1	TRINITY_DN17663_c3_g3, TRINITY_DN19174_c4_g1	TRINITY_DN21993_c6_g2, TRINITY_DN22759_c1_g2	TRINITY_DN23709_c9_g1, TRINITY_DN25179_c1_g2	TRINITY_DN17760_c10_g1, TRINITY_DN18964_c3_g1	TRINITY_DN46334_c2_g1, TRINITY_DN48377_c1_g2	OG0000354	2	2	2	2	2	2	2	2	2	0	OG0000354	TRINITY_DN1610_c1_g1	TRINITY_DN23415_c5_g2	TRINITY_DN253_c1_g2	TRINITY_DN19025_c6_g6	TRINITY_DN19174_c4_g1	TRINITY_DN21993_c6_g2	TRINITY_DN25179_c1_g2	TRINITY_DN17760_c10_g1	TRINITY_DN48377_c1_g2	OG0000354	1	1	1	1	1	1	1	1	1	1	OG0000354	TRINITY_DN253_c1_g2	TRINITY_DN19174_c4_g1	TRINITY_DN48377_c1_g2	TRINITY_DN21993_c6_g2	TRINITY_DN25179_c1_g2	TRINITY_DN19025_c6_g6	TRINITY_DN17760_c10_g1
OG0000355	TRINITY_DN1638_c0_g4, TRINITY_DN440_c1_g1	TRINITY_DN20505_c4_g2, TRINITY_DN21252_c2_g1	TRINITY_DN1306_c1_g2, TRINITY_DN7254_c0_g1	TRINITY_DN18634_c7_g1	TRINITY_DN18672_c6_g5, TRINITY_DN19118_c4_g1	TRINITY_DN22748_c6_g1, TRINITY_DN23912_c5_g1	TRINITY_DN21707_c3_g2, TRINITY_DN23122_c1_g2	TRINITY_DN19099_c3_g1, TRINITY_DN21080_c8_g1	TRINITY_DN43440_c4_g6, TRINITY_DN47415_c4_g1, TRINITY_DN48022_c7_g2	OG0000355	2	2	2	1	2	2	2	2	3	0	OG0000355	TRINITY_DN440_c1_g1	TRINITY_DN20505_c4_g2	TRINITY_DN1306_c1_g2	TRINITY_DN18634_c7_g1	TRINITY_DN18672_c6_g5	TRINITY_DN22748_c6_g1	TRINITY_DN21707_c3_g2	TRINITY_DN21080_c8_g1	TRINITY_DN43440_c4_g6	OG0000355	1	1	1	1	1	1	1	1	1	1	OG0000355	TRINITY_DN1306_c1_g2	TRINITY_DN18672_c6_g5	TRINITY_DN43440_c4_g6	TRINITY_DN22748_c6_g1	TRINITY_DN21707_c3_g2	TRINITY_DN18634_c7_g1	TRINITY_DN21080_c8_g1
OG0000357	TRINITY_DN649_c1_g1, TRINITY_DN7156_c1_g1	TRINITY_DN23953_c8_g1	TRINITY_DN1394_c0_g1, TRINITY_DN1863_c0_g2	TRINITY_DN13624_c1_g2, TRINITY_DN20410_c8_g1	TRINITY_DN17471_c8_g1, TRINITY_DN17741_c6_g1	TRINITY_DN22858_c6_g2, TRINITY_DN24051_c7_g2, TRINITY_DN24051_c7_g3	TRINITY_DN19389_c8_g1, TRINITY_DN21154_c3_g1	TRINITY_DN17897_c4_g1, TRINITY_DN19797_c4_g1	TRINITY_DN40991_c0_g1, TRINITY_DN45777_c6_g3	OG0000357	2	1	2	2	2	3	2	2	2	0	OG0000357	TRINITY_DN7156_c1_g1	TRINITY_DN23953_c8_g1	TRINITY_DN1394_c0_g1	TRINITY_DN20410_c8_g1	TRINITY_DN17471_c8_g1	TRINITY_DN22858_c6_g2	TRINITY_DN21154_c3_g1	TRINITY_DN17897_c4_g1	TRINITY_DN45777_c6_g3	OG0000357	1	1	1	1	1	1	1	1	1	1	OG0000357	TRINITY_DN1394_c0_g1	TRINITY_DN17471_c8_g1	TRINITY_DN45777_c6_g3	TRINITY_DN22858_c6_g2	TRINITY_DN21154_c3_g1	TRINITY_DN20410_c8_g1	TRINITY_DN17897_c4_g1
OG0000360	TRINITY_DN156_c4_g1	TRINITY_DN18748_c8_g1, TRINITY_DN19373_c1_g1	TRINITY_DN1557_c1_g2, TRINITY_DN1557_c6_g1	TRINITY_DN12958_c5_g1, TRINITY_DN21397_c8_g1	TRINITY_DN17682_c0_g1, TRINITY_DN17682_c0_g4	TRINITY_DN22813_c3_g2, TRINITY_DN23783_c13_g1	TRINITY_DN23163_c5_g1, TRINITY_DN23163_c5_g4	TRINITY_DN19507_c6_g2, TRINITY_DN19507_c6_g4	TRINITY_DN42551_c2_g1, TRINITY_DN42551_c2_g3, TRINITY_DN47822_c0_g2	OG0000360	1	2	2	2	2	2	2	2	3	0	OG0000360	TRINITY_DN156_c4_g1	TRINITY_DN18748_c8_g1	TRINITY_DN1557_c1_g2	TRINITY_DN21397_c8_g1	TRINITY_DN17682_c0_g1	TRINITY_DN23783_c13_g1	TRINITY_DN23163_c5_g1	TRINITY_DN19507_c6_g2	TRINITY_DN47822_c0_g2	OG0000360	1	1	1	1	1	1	1	1	1	1	OG0000360	TRINITY_DN1557_c1_g2	TRINITY_DN17682_c0_g1	TRINITY_DN47822_c0_g2	TRINITY_DN23783_c13_g1	TRINITY_DN23163_c5_g1	TRINITY_DN21397_c8_g1	TRINITY_DN19507_c6_g2
OG0000361	TRINITY_DN1731_c1_g1	TRINITY_DN21125_c2_g1, TRINITY_DN22458_c11_g4	TRINITY_DN15592_c0_g1, TRINITY_DN15592_c2_g1, TRINITY_DN2042_c0_g2	TRINITY_DN17819_c4_g1, TRINITY_DN18673_c8_g1	TRINITY_DN15854_c0_g2, TRINITY_DN18698_c3_g1	TRINITY_DN18047_c0_g1	TRINITY_DN17452_c0_g1, TRINITY_DN24041_c4_g3	TRINITY_DN15774_c0_g1, TRINITY_DN19685_c4_g1	TRINITY_DN37802_c0_g1, TRINITY_DN39377_c0_g1, TRINITY_DN40547_c0_g1	OG0000361	1	2	3	2	2	1	2	2	3	0	OG0000361	TRINITY_DN1731_c1_g1	TRINITY_DN22458_c11_g4	TRINITY_DN2042_c0_g2	TRINITY_DN17819_c4_g1	TRINITY_DN15854_c0_g2	TRINITY_DN18047_c0_g1	TRINITY_DN17452_c0_g1	TRINITY_DN19685_c4_g1	TRINITY_DN37802_c0_g1	OG0000361	1	1	1	1	1	1	1	1	1	1	OG0000361	TRINITY_DN2042_c0_g2	TRINITY_DN15854_c0_g2	TRINITY_DN37802_c0_g1	TRINITY_DN18047_c0_g1	TRINITY_DN17452_c0_g1	TRINITY_DN17819_c4_g1	TRINITY_DN19685_c4_g1
OG0000364	TRINITY_DN2091_c2_g4, TRINITY_DN483_c1_g1	TRINITY_DN19166_c3_g1, TRINITY_DN21226_c2_g1	TRINITY_DN16541_c0_g2, TRINITY_DN3826_c0_g3	TRINITY_DN13482_c10_g1, TRINITY_DN18310_c10_g1	TRINITY_DN18309_c10_g1, TRINITY_DN19303_c6_g2	TRINITY_DN23230_c0_g1, TRINITY_DN24363_c8_g2	TRINITY_DN23541_c8_g1, TRINITY_DN24546_c3_g1	TRINITY_DN19909_c4_g3, TRINITY_DN21011_c0_g2	TRINITY_DN48600_c0_g1, TRINITY_DN48762_c2_g1	OG0000364	2	2	2	2	2	2	2	2	2	0	OG0000364	TRINITY_DN2091_c2_g4	TRINITY_DN21226_c2_g1	TRINITY_DN16541_c0_g2	TRINITY_DN18310_c10_g1	TRINITY_DN18309_c10_g1	TRINITY_DN23230_c0_g1	TRINITY_DN23541_c8_g1	TRINITY_DN21011_c0_g2	TRINITY_DN48762_c2_g1	OG0000364	1	1	1	1	1	1	1	1	1	1	OG0000364	TRINITY_DN16541_c0_g2	TRINITY_DN18309_c10_g1	TRINITY_DN48762_c2_g1	TRINITY_DN23230_c0_g1	TRINITY_DN23541_c8_g1	TRINITY_DN18310_c10_g1	TRINITY_DN21011_c0_g2
OG0000365	TRINITY_DN4538_c0_g1	TRINITY_DN14593_c0_g3, TRINITY_DN22319_c0_g1, TRINITY_DN23659_c5_g1	TRINITY_DN168_c0_g2, TRINITY_DN317_c0_g2	TRINITY_DN18694_c2_g1, TRINITY_DN20631_c11_g1	TRINITY_DN18277_c6_g1, TRINITY_DN18986_c5_g1	TRINITY_DN22011_c5_g1, TRINITY_DN23054_c1_g1	TRINITY_DN24107_c3_g1, TRINITY_DN24519_c3_g1	TRINITY_DN17204_c0_g1, TRINITY_DN20748_c9_g1	TRINITY_DN44773_c0_g1, TRINITY_DN46904_c1_g1	OG0000365	1	3	2	2	2	2	2	2	2	0	OG0000365	TRINITY_DN4538_c0_g1	TRINITY_DN22319_c0_g1	TRINITY_DN317_c0_g2	TRINITY_DN20631_c11_g1	TRINITY_DN18986_c5_g1	TRINITY_DN23054_c1_g1	TRINITY_DN24519_c3_g1	TRINITY_DN20748_c9_g1	TRINITY_DN46904_c1_g1	OG0000365	1	1	1	1	1	1	1	1	1	1	OG0000365	TRINITY_DN317_c0_g2	TRINITY_DN18986_c5_g1	TRINITY_DN46904_c1_g1	TRINITY_DN23054_c1_g1	TRINITY_DN24519_c3_g1	TRINITY_DN20631_c11_g1	TRINITY_DN20748_c9_g1
OG0000367	TRINITY_DN6890_c0_g2	TRINITY_DN25880_c0_g1, TRINITY_DN48178_c0_g1, TRINITY_DN55504_c0_g1	TRINITY_DN17525_c1_g1, TRINITY_DN17525_c2_g1	TRINITY_DN12068_c0_g1	TRINITY_DN18915_c4_g2, TRINITY_DN4945_c0_g1	TRINITY_DN19468_c0_g1, TRINITY_DN19468_c0_g2	TRINITY_DN19354_c8_g1, TRINITY_DN24220_c3_g1	TRINITY_DN32573_c0_g1, TRINITY_DN43238_c0_g1	TRINITY_DN12587_c0_g1, TRINITY_DN55032_c0_g1, TRINITY_DN74620_c0_g1	OG0000367	1	3	2	1	2	2	2	2	3	0	OG0000367	TRINITY_DN6890_c0_g2	TRINITY_DN55504_c0_g1	TRINITY_DN17525_c2_g1	TRINITY_DN12068_c0_g1	TRINITY_DN4945_c0_g1	TRINITY_DN19468_c0_g1	TRINITY_DN24220_c3_g1	TRINITY_DN32573_c0_g1	TRINITY_DN74620_c0_g1	OG0000367	1	1	1	1	1	1	1	1	1	1	OG0000367	TRINITY_DN17525_c2_g1	TRINITY_DN4945_c0_g1	TRINITY_DN74620_c0_g1	TRINITY_DN19468_c0_g1	TRINITY_DN24220_c3_g1	TRINITY_DN12068_c0_g1	TRINITY_DN32573_c0_g1
OG0000368	TRINITY_DN26_c0_g1, TRINITY_DN2924_c0_g1	TRINITY_DN20392_c4_g1, TRINITY_DN22181_c2_g1	TRINITY_DN1797_c0_g1, TRINITY_DN3468_c0_g1	TRINITY_DN15418_c3_g1, TRINITY_DN16717_c6_g1	TRINITY_DN17065_c10_g1, TRINITY_DN17757_c2_g1	TRINITY_DN22237_c4_g1, TRINITY_DN22941_c8_g1	TRINITY_DN20747_c5_g1, TRINITY_DN24150_c4_g1	TRINITY_DN19866_c4_g1, TRINITY_DN20915_c7_g1	TRINITY_DN46367_c0_g2, TRINITY_DN47240_c1_g1	OG0000368	2	2	2	2	2	2	2	2	2	0	OG0000368	TRINITY_DN26_c0_g1	TRINITY_DN20392_c4_g1	TRINITY_DN1797_c0_g1	TRINITY_DN15418_c3_g1	TRINITY_DN17065_c10_g1	TRINITY_DN22237_c4_g1	TRINITY_DN20747_c5_g1	TRINITY_DN20915_c7_g1	TRINITY_DN47240_c1_g1	OG0000368	1	1	1	1	1	1	1	1	1	1	OG0000368	TRINITY_DN1797_c0_g1	TRINITY_DN17065_c10_g1	TRINITY_DN47240_c1_g1	TRINITY_DN22237_c4_g1	TRINITY_DN20747_c5_g1	TRINITY_DN15418_c3_g1	TRINITY_DN20915_c7_g1
OG0000371	TRINITY_DN16745_c0_g1, TRINITY_DN25031_c0_g2	TRINITY_DN22194_c8_g2, TRINITY_DN22291_c10_g1	TRINITY_DN2004_c11_g1, TRINITY_DN33555_c0_g1	TRINITY_DN13806_c5_g1, TRINITY_DN19774_c7_g3	TRINITY_DN16624_c8_g1, TRINITY_DN27432_c0_g1	TRINITY_DN22926_c5_g9, TRINITY_DN24849_c3_g5	TRINITY_DN22783_c8_g1, TRINITY_DN22841_c12_g1	TRINITY_DN16620_c0_g1, TRINITY_DN17136_c1_g1	TRINITY_DN45256_c0_g1, TRINITY_DN47439_c2_g1	OG0000371	2	2	2	2	2	2	2	2	2	0	OG0000371	TRINITY_DN25031_c0_g2	TRINITY_DN22291_c10_g1	TRINITY_DN2004_c11_g1	TRINITY_DN13806_c5_g1	TRINITY_DN16624_c8_g1	TRINITY_DN24849_c3_g5	TRINITY_DN22783_c8_g1	TRINITY_DN17136_c1_g1	TRINITY_DN45256_c0_g1	OG0000371	1	1	1	1	1	1	1	1	1	1	OG0000371	TRINITY_DN2004_c11_g1	TRINITY_DN16624_c8_g1	TRINITY_DN45256_c0_g1	TRINITY_DN24849_c3_g5	TRINITY_DN22783_c8_g1	TRINITY_DN13806_c5_g1	TRINITY_DN17136_c1_g1
OG0000373	TRINITY_DN59282_c1_g1	TRINITY_DN23015_c6_g2, TRINITY_DN30290_c0_g1, TRINITY_DN42935_c0_g1	TRINITY_DN22585_c2_g1, TRINITY_DN22585_c3_g1	TRINITY_DN11754_c0_g2, TRINITY_DN6729_c0_g1	TRINITY_DN5170_c0_g1	TRINITY_DN1738_c0_g1, TRINITY_DN48783_c0_g1, TRINITY_DN54218_c0_g1	TRINITY_DN16099_c0_g2, TRINITY_DN17609_c0_g1	TRINITY_DN11454_c0_g1, TRINITY_DN40687_c0_g1, TRINITY_DN46776_c0_g1	TRINITY_DN73556_c0_g1	OG0000373	1	3	2	2	1	3	2	3	1	0	OG0000373	TRINITY_DN59282_c1_g1	TRINITY_DN23015_c6_g2	TRINITY_DN22585_c2_g1	TRINITY_DN11754_c0_g2	TRINITY_DN5170_c0_g1	TRINITY_DN54218_c0_g1	TRINITY_DN17609_c0_g1	TRINITY_DN46776_c0_g1	TRINITY_DN73556_c0_g1	OG0000373	1	1	1	1	1	1	1	1	1	1	OG0000373	TRINITY_DN22585_c2_g1	TRINITY_DN5170_c0_g1	TRINITY_DN73556_c0_g1	TRINITY_DN54218_c0_g1	TRINITY_DN17609_c0_g1	TRINITY_DN11754_c0_g2	TRINITY_DN46776_c0_g1
OG0000376	TRINITY_DN1031_c1_g3, TRINITY_DN412_c0_g2	TRINITY_DN19649_c7_g3, TRINITY_DN23061_c6_g1	TRINITY_DN239_c8_g3, TRINITY_DN364_c3_g2	TRINITY_DN15125_c2_g1, TRINITY_DN16475_c5_g1	TRINITY_DN16344_c6_g1, TRINITY_DN17946_c5_g1	TRINITY_DN23767_c9_g2, TRINITY_DN24325_c4_g1	TRINITY_DN19249_c7_g1, TRINITY_DN24572_c1_g3	TRINITY_DN18165_c4_g3, TRINITY_DN21247_c8_g1	TRINITY_DN48685_c1_g1, TRINITY_DN48748_c1_g1	OG0000376	2	2	2	2	2	2	2	2	2	0	OG0000376	TRINITY_DN1031_c1_g3	TRINITY_DN19649_c7_g3	TRINITY_DN364_c3_g2	TRINITY_DN15125_c2_g1	TRINITY_DN16344_c6_g1	TRINITY_DN24325_c4_g1	TRINITY_DN24572_c1_g3	TRINITY_DN18165_c4_g3	TRINITY_DN48685_c1_g1	OG0000376	1	1	1	1	1	1	1	1	1	1	OG0000376	TRINITY_DN364_c3_g2	TRINITY_DN16344_c6_g1	TRINITY_DN48685_c1_g1	TRINITY_DN24325_c4_g1	TRINITY_DN24572_c1_g3	TRINITY_DN15125_c2_g1	TRINITY_DN18165_c4_g3
OG0000378	TRINITY_DN16968_c12_g1, TRINITY_DN16968_c13_g1, TRINITY_DN16968_c5_g1	TRINITY_DN22536_c9_g9	TRINITY_DN29261_c16_g1, TRINITY_DN29261_c9_g1	TRINITY_DN17221_c6_g2	TRINITY_DN16269_c1_g6	TRINITY_DN15223_c0_g1, TRINITY_DN15223_c0_g2, TRINITY_DN29394_c0_g1	TRINITY_DN24936_c8_g1, TRINITY_DN24936_c8_g3, TRINITY_DN24936_c8_g4	TRINITY_DN19764_c4_g7	TRINITY_DN35964_c0_g1, TRINITY_DN38166_c0_g1, TRINITY_DN44599_c0_g2	OG0000378	3	1	2	1	1	3	3	1	3	0	OG0000378	TRINITY_DN16968_c13_g1	TRINITY_DN22536_c9_g9	TRINITY_DN29261_c16_g1	TRINITY_DN17221_c6_g2	TRINITY_DN16269_c1_g6	TRINITY_DN15223_c0_g2	TRINITY_DN24936_c8_g1	TRINITY_DN19764_c4_g7	TRINITY_DN44599_c0_g2	OG0000378	1	1	1	1	1	1	1	1	1	1	OG0000378	TRINITY_DN29261_c16_g1	TRINITY_DN16269_c1_g6	TRINITY_DN44599_c0_g2	TRINITY_DN15223_c0_g2	TRINITY_DN24936_c8_g1	TRINITY_DN17221_c6_g2	TRINITY_DN19764_c4_g7
OG0000385	TRINITY_DN2557_c0_g1, TRINITY_DN2557_c0_g2	TRINITY_DN19259_c0_g1, TRINITY_DN19259_c6_g2, TRINITY_DN21582_c3_g1	TRINITY_DN3256_c5_g1, TRINITY_DN408_c2_g2	TRINITY_DN14987_c5_g1, TRINITY_DN19753_c1_g1	TRINITY_DN17722_c0_g1	TRINITY_DN22043_c0_g1, TRINITY_DN22052_c5_g1	TRINITY_DN18599_c4_g1, TRINITY_DN20923_c0_g1, TRINITY_DN24576_c3_g1	TRINITY_DN20346_c11_g1	TRINITY_DN46379_c0_g1, TRINITY_DN46627_c0_g1	OG0000385	2	3	2	2	1	2	3	1	2	0	OG0000385	TRINITY_DN2557_c0_g1	TRINITY_DN19259_c6_g2	TRINITY_DN3256_c5_g1	TRINITY_DN19753_c1_g1	TRINITY_DN17722_c0_g1	TRINITY_DN22043_c0_g1	TRINITY_DN20923_c0_g1	TRINITY_DN20346_c11_g1	TRINITY_DN46627_c0_g1	OG0000385	1	1	1	1	1	1	1	1	1	1	OG0000385	TRINITY_DN3256_c5_g1	TRINITY_DN17722_c0_g1	TRINITY_DN46627_c0_g1	TRINITY_DN22043_c0_g1	TRINITY_DN20923_c0_g1	TRINITY_DN19753_c1_g1	TRINITY_DN20346_c11_g1
OG0000387	TRINITY_DN1850_c0_g1	TRINITY_DN22879_c2_g1	TRINITY_DN387_c2_g1, TRINITY_DN5261_c0_g4	TRINITY_DN17591_c5_g3, TRINITY_DN18896_c8_g1, TRINITY_DN19806_c6_g2	TRINITY_DN18785_c0_g1, TRINITY_DN19400_c4_g1, TRINITY_DN19714_c13_g1	TRINITY_DN22212_c7_g3, TRINITY_DN22994_c3_g4	TRINITY_DN22755_c5_g2, TRINITY_DN24120_c5_g8, TRINITY_DN24772_c3_g1	TRINITY_DN18444_c2_g3	TRINITY_DN45705_c3_g2, TRINITY_DN46615_c4_g1	OG0000387	1	1	2	3	3	2	3	1	2	0	OG0000387	TRINITY_DN1850_c0_g1	TRINITY_DN22879_c2_g1	TRINITY_DN387_c2_g1	TRINITY_DN17591_c5_g3	TRINITY_DN19714_c13_g1	TRINITY_DN22212_c7_g3	TRINITY_DN22755_c5_g2	TRINITY_DN18444_c2_g3	TRINITY_DN46615_c4_g1	OG0000387	1	1	1	1	1	1	1	1	1	1	OG0000387	TRINITY_DN387_c2_g1	TRINITY_DN19714_c13_g1	TRINITY_DN46615_c4_g1	TRINITY_DN22212_c7_g3	TRINITY_DN22755_c5_g2	TRINITY_DN17591_c5_g3	TRINITY_DN18444_c2_g3
OG0000390	TRINITY_DN1892_c0_g1, TRINITY_DN273_c2_g5	TRINITY_DN21296_c2_g1, TRINITY_DN22353_c0_g2	TRINITY_DN408_c1_g1, TRINITY_DN92_c2_g1	TRINITY_DN20593_c0_g1, TRINITY_DN21392_c2_g2	TRINITY_DN19266_c1_g1, TRINITY_DN19387_c2_g2	TRINITY_DN24034_c6_g2, TRINITY_DN24591_c8_g1	TRINITY_DN24611_c2_g1, TRINITY_DN25281_c2_g1	TRINITY_DN21087_c5_g1, TRINITY_DN21164_c2_g1	TRINITY_DN48909_c1_g1, TRINITY_DN49014_c4_g1	OG0000390	2	2	2	2	2	2	2	2	2	0	OG0000390	TRINITY_DN1892_c0_g1	TRINITY_DN22353_c0_g2	TRINITY_DN408_c1_g1	TRINITY_DN20593_c0_g1	TRINITY_DN19266_c1_g1	TRINITY_DN24591_c8_g1	TRINITY_DN24611_c2_g1	TRINITY_DN21087_c5_g1	TRINITY_DN48909_c1_g1	OG0000390	1	1	1	1	1	1	1	1	1	1	OG0000390	TRINITY_DN408_c1_g1	TRINITY_DN19266_c1_g1	TRINITY_DN48909_c1_g1	TRINITY_DN24591_c8_g1	TRINITY_DN24611_c2_g1	TRINITY_DN20593_c0_g1	TRINITY_DN21087_c5_g1
OG0000391	TRINITY_DN2844_c1_g2, TRINITY_DN912_c0_g4	TRINITY_DN21045_c0_g1, TRINITY_DN9832_c0_g1	TRINITY_DN4142_c2_g1, TRINITY_DN4142_c2_g2	TRINITY_DN20709_c3_g1, TRINITY_DN20709_c3_g2	TRINITY_DN16925_c4_g1, TRINITY_DN16925_c4_g2	TRINITY_DN21777_c4_g1, TRINITY_DN21777_c4_g3	TRINITY_DN21629_c1_g1, TRINITY_DN21629_c1_g2	TRINITY_DN17538_c0_g1, TRINITY_DN17538_c0_g2	TRINITY_DN44083_c0_g1, TRINITY_DN44083_c0_g2	OG0000391	2	2	2	2	2	2	2	2	2	0	OG0000391	TRINITY_DN912_c0_g4	TRINITY_DN21045_c0_g1	TRINITY_DN4142_c2_g1	TRINITY_DN20709_c3_g2	TRINITY_DN16925_c4_g2	TRINITY_DN21777_c4_g1	TRINITY_DN21629_c1_g2	TRINITY_DN17538_c0_g2	TRINITY_DN44083_c0_g1	OG0000391	1	1	1	1	1	1	1	1	1	1	OG0000391	TRINITY_DN4142_c2_g1	TRINITY_DN16925_c4_g2	TRINITY_DN44083_c0_g1	TRINITY_DN21777_c4_g1	TRINITY_DN21629_c1_g2	TRINITY_DN20709_c3_g2	TRINITY_DN17538_c0_g2
OG0000393	TRINITY_DN264_c12_g1, TRINITY_DN264_c8_g1	TRINITY_DN18101_c6_g1, TRINITY_DN19462_c6_g1	TRINITY_DN4896_c0_g3, TRINITY_DN5885_c2_g1	TRINITY_DN20416_c4_g2	TRINITY_DN17101_c3_g1, TRINITY_DN17552_c6_g1	TRINITY_DN24033_c3_g1, TRINITY_DN24033_c4_g1	TRINITY_DN20977_c0_g1, TRINITY_DN21149_c0_g2	TRINITY_DN18472_c4_g1, TRINITY_DN18472_c4_g2	TRINITY_DN44149_c11_g1, TRINITY_DN44209_c8_g1, TRINITY_DN46237_c0_g1	OG0000393	2	2	2	1	2	2	2	2	3	0	OG0000393	TRINITY_DN264_c8_g1	TRINITY_DN19462_c6_g1	TRINITY_DN5885_c2_g1	TRINITY_DN20416_c4_g2	TRINITY_DN17101_c3_g1	TRINITY_DN24033_c3_g1	TRINITY_DN20977_c0_g1	TRINITY_DN18472_c4_g1	TRINITY_DN46237_c0_g1	OG0000393	1	1	1	1	1	1	1	1	1	1	OG0000393	TRINITY_DN5885_c2_g1	TRINITY_DN17101_c3_g1	TRINITY_DN46237_c0_g1	TRINITY_DN24033_c3_g1	TRINITY_DN20977_c0_g1	TRINITY_DN20416_c4_g2	TRINITY_DN18472_c4_g1
OG0000394	TRINITY_DN2019_c0_g2, TRINITY_DN2963_c2_g2	TRINITY_DN18548_c0_g3, TRINITY_DN23478_c12_g2	TRINITY_DN661_c2_g3	TRINITY_DN20761_c4_g4	TRINITY_DN19033_c3_g1, TRINITY_DN19033_c3_g3, TRINITY_DN19730_c9_g2	TRINITY_DN22682_c8_g1, TRINITY_DN24586_c6_g5	TRINITY_DN22663_c5_g5, TRINITY_DN24567_c6_g2, TRINITY_DN24567_c6_g3	TRINITY_DN19846_c6_g3, TRINITY_DN21360_c8_g1	TRINITY_DN48064_c4_g2, TRINITY_DN48083_c5_g2	OG0000394	2	2	1	1	3	2	3	2	2	0	OG0000394	TRINITY_DN2963_c2_g2	TRINITY_DN23478_c12_g2	TRINITY_DN661_c2_g3	TRINITY_DN20761_c4_g4	TRINITY_DN19730_c9_g2	TRINITY_DN24586_c6_g5	TRINITY_DN24567_c6_g3	TRINITY_DN19846_c6_g3	TRINITY_DN48083_c5_g2	OG0000394	1	1	1	1	1	1	1	1	1	1	OG0000394	TRINITY_DN661_c2_g3	TRINITY_DN19730_c9_g2	TRINITY_DN48083_c5_g2	TRINITY_DN24586_c6_g5	TRINITY_DN24567_c6_g3	TRINITY_DN20761_c4_g4	TRINITY_DN19846_c6_g3
OG0000395	TRINITY_DN207_c0_g2	TRINITY_DN12697_c0_g1, TRINITY_DN18902_c2_g1, TRINITY_DN19226_c6_g4	TRINITY_DN6762_c0_g2	TRINITY_DN15214_c7_g1, TRINITY_DN20954_c11_g1	TRINITY_DN16820_c5_g6, TRINITY_DN18292_c6_g1	TRINITY_DN23122_c3_g4, TRINITY_DN24035_c8_g1	TRINITY_DN20036_c0_g1, TRINITY_DN22028_c8_g1	TRINITY_DN19534_c3_g1, TRINITY_DN21244_c3_g3, TRINITY_DN21244_c3_g6	TRINITY_DN46208_c4_g1, TRINITY_DN48084_c2_g1	OG0000395	1	3	1	2	2	2	2	3	2	0	OG0000395	TRINITY_DN207_c0_g2	TRINITY_DN18902_c2_g1	TRINITY_DN6762_c0_g2	TRINITY_DN20954_c11_g1	TRINITY_DN16820_c5_g6	TRINITY_DN23122_c3_g4	TRINITY_DN20036_c0_g1	TRINITY_DN21244_c3_g3	TRINITY_DN46208_c4_g1	OG0000395	1	1	1	1	1	1	1	1	1	1	OG0000395	TRINITY_DN6762_c0_g2	TRINITY_DN16820_c5_g6	TRINITY_DN46208_c4_g1	TRINITY_DN23122_c3_g4	TRINITY_DN20036_c0_g1	TRINITY_DN20954_c11_g1	TRINITY_DN21244_c3_g3
OG0000396	TRINITY_DN9119_c0_g1	TRINITY_DN23516_c8_g1, TRINITY_DN23516_c8_g3, TRINITY_DN23516_c8_g9	TRINITY_DN6950_c0_g2, TRINITY_DN968_c2_g2	TRINITY_DN20832_c2_g1	TRINITY_DN16210_c0_g1, TRINITY_DN18091_c3_g2	TRINITY_DN21099_c0_g1, TRINITY_DN23083_c7_g1	TRINITY_DN13622_c0_g1, TRINITY_DN24024_c8_g1, TRINITY_DN24707_c3_g2	TRINITY_DN18735_c3_g4, TRINITY_DN19061_c4_g3	TRINITY_DN44899_c0_g1, TRINITY_DN48608_c5_g1	OG0000396	1	3	2	1	2	2	3	2	2	0	OG0000396	TRINITY_DN9119_c0_g1	TRINITY_DN23516_c8_g1	TRINITY_DN968_c2_g2	TRINITY_DN20832_c2_g1	TRINITY_DN16210_c0_g1	TRINITY_DN21099_c0_g1	TRINITY_DN24024_c8_g1	TRINITY_DN19061_c4_g3	TRINITY_DN48608_c5_g1	OG0000396	1	1	1	1	1	1	1	1	1	1	OG0000396	TRINITY_DN968_c2_g2	TRINITY_DN16210_c0_g1	TRINITY_DN48608_c5_g1	TRINITY_DN21099_c0_g1	TRINITY_DN24024_c8_g1	TRINITY_DN20832_c2_g1	TRINITY_DN19061_c4_g3
OG0000398	TRINITY_DN1364_c2_g4, TRINITY_DN4029_c1_g3	TRINITY_DN19731_c4_g1, TRINITY_DN19731_c4_g3, TRINITY_DN22868_c6_g1	TRINITY_DN739_c5_g1	TRINITY_DN18198_c7_g1, TRINITY_DN18198_c7_g3, TRINITY_DN19424_c2_g2	TRINITY_DN17702_c0_g1	TRINITY_DN23652_c6_g1	TRINITY_DN22779_c2_g2, TRINITY_DN23753_c11_g1, TRINITY_DN23753_c11_g2	TRINITY_DN17931_c10_g2, TRINITY_DN20356_c2_g3	TRINITY_DN46778_c1_g1, TRINITY_DN47734_c0_g1	OG0000398	2	3	1	3	1	1	3	2	2	0	OG0000398	TRINITY_DN4029_c1_g3	TRINITY_DN19731_c4_g3	TRINITY_DN739_c5_g1	TRINITY_DN18198_c7_g1	TRINITY_DN17702_c0_g1	TRINITY_DN23652_c6_g1	TRINITY_DN23753_c11_g1	TRINITY_DN17931_c10_g2	TRINITY_DN47734_c0_g1	OG0000398	1	1	1	1	1	1	1	1	1	1	OG0000398	TRINITY_DN739_c5_g1	TRINITY_DN17702_c0_g1	TRINITY_DN47734_c0_g1	TRINITY_DN23652_c6_g1	TRINITY_DN23753_c11_g1	TRINITY_DN18198_c7_g1	TRINITY_DN17931_c10_g2
OG0000401	TRINITY_DN3456_c1_g1	TRINITY_DN19238_c15_g1, TRINITY_DN20248_c6_g2, TRINITY_DN21053_c8_g1	TRINITY_DN784_c0_g3	TRINITY_DN13179_c8_g1, TRINITY_DN13179_c8_g2, TRINITY_DN20596_c4_g1	TRINITY_DN17178_c6_g5, TRINITY_DN17232_c4_g9	TRINITY_DN22649_c5_g1, TRINITY_DN24704_c8_g2	TRINITY_DN18211_c6_g10, TRINITY_DN20233_c1_g4	TRINITY_DN18186_c7_g1, TRINITY_DN20342_c6_g1, TRINITY_DN20342_c6_g3	TRINITY_DN48198_c3_g3	OG0000401	1	3	1	3	2	2	2	3	1	0	OG0000401	TRINITY_DN3456_c1_g1	TRINITY_DN21053_c8_g1	TRINITY_DN784_c0_g3	TRINITY_DN13179_c8_g1	TRINITY_DN17232_c4_g9	TRINITY_DN24704_c8_g2	TRINITY_DN20233_c1_g4	TRINITY_DN20342_c6_g1	TRINITY_DN48198_c3_g3	OG0000401	1	1	1	1	1	1	1	1	1	1	OG0000401	TRINITY_DN784_c0_g3	TRINITY_DN17232_c4_g9	TRINITY_DN48198_c3_g3	TRINITY_DN24704_c8_g2	TRINITY_DN20233_c1_g4	TRINITY_DN13179_c8_g1	TRINITY_DN20342_c6_g1
OG0000402	TRINITY_DN1011_c7_g2	TRINITY_DN21682_c9_g3, TRINITY_DN22075_c9_g1, TRINITY_DN53910_c0_g1	TRINITY_DN7863_c0_g1	TRINITY_DN16924_c4_g1, TRINITY_DN19971_c1_g1, TRINITY_DN19971_c1_g3	TRINITY_DN18994_c5_g1, TRINITY_DN19524_c4_g1	TRINITY_DN21164_c0_g1, TRINITY_DN22283_c2_g1	TRINITY_DN18366_c4_g2, TRINITY_DN23468_c4_g1	TRINITY_DN16304_c0_g1, TRINITY_DN19853_c1_g2	TRINITY_DN42786_c0_g1, TRINITY_DN47393_c0_g1	OG0000402	1	3	1	3	2	2	2	2	2	0	OG0000402	TRINITY_DN1011_c7_g2	TRINITY_DN21682_c9_g3	TRINITY_DN7863_c0_g1	TRINITY_DN16924_c4_g1	TRINITY_DN18994_c5_g1	TRINITY_DN22283_c2_g1	TRINITY_DN23468_c4_g1	TRINITY_DN16304_c0_g1	TRINITY_DN47393_c0_g1	OG0000402	1	1	1	1	1	1	1	1	1	1	OG0000402	TRINITY_DN7863_c0_g1	TRINITY_DN18994_c5_g1	TRINITY_DN47393_c0_g1	TRINITY_DN22283_c2_g1	TRINITY_DN23468_c4_g1	TRINITY_DN16924_c4_g1	TRINITY_DN16304_c0_g1
OG0000404	TRINITY_DN2909_c0_g2, TRINITY_DN2_c2_g2	TRINITY_DN21616_c7_g1, TRINITY_DN22924_c5_g1	TRINITY_DN889_c0_g1, TRINITY_DN907_c3_g1	TRINITY_DN16094_c8_g1, TRINITY_DN17834_c4_g2	TRINITY_DN17254_c9_g1, TRINITY_DN17820_c2_g1	TRINITY_DN23062_c7_g2, TRINITY_DN23952_c9_g1	TRINITY_DN20608_c7_g1, TRINITY_DN22873_c8_g1	TRINITY_DN19868_c0_g1, TRINITY_DN20004_c7_g1	TRINITY_DN41442_c0_g1, TRINITY_DN47307_c6_g1	OG0000404	2	2	2	2	2	2	2	2	2	0	OG0000404	TRINITY_DN2_c2_g2	TRINITY_DN21616_c7_g1	TRINITY_DN907_c3_g1	TRINITY_DN16094_c8_g1	TRINITY_DN17820_c2_g1	TRINITY_DN23952_c9_g1	TRINITY_DN20608_c7_g1	TRINITY_DN19868_c0_g1	TRINITY_DN41442_c0_g1	OG0000404	1	1	1	1	1	1	1	1	1	1	OG0000404	TRINITY_DN907_c3_g1	TRINITY_DN17820_c2_g1	TRINITY_DN41442_c0_g1	TRINITY_DN23952_c9_g1	TRINITY_DN20608_c7_g1	TRINITY_DN16094_c8_g1	TRINITY_DN19868_c0_g1
OG0000405	TRINITY_DN4530_c0_g1, TRINITY_DN90_c0_g3	TRINITY_DN20934_c0_g2, TRINITY_DN23175_c1_g1	TRINITY_DN894_c4_g2, TRINITY_DN955_c0_g2	TRINITY_DN19556_c2_g1, TRINITY_DN19877_c0_g3	TRINITY_DN16239_c0_g1, TRINITY_DN17652_c3_g1	TRINITY_DN21448_c0_g1, TRINITY_DN22591_c3_g1	TRINITY_DN20016_c4_g1, TRINITY_DN23154_c2_g1	TRINITY_DN19016_c10_g1, TRINITY_DN19469_c6_g1	TRINITY_DN47225_c0_g1, TRINITY_DN47762_c4_g3	OG0000405	2	2	2	2	2	2	2	2	2	0	OG0000405	TRINITY_DN90_c0_g3	TRINITY_DN23175_c1_g1	TRINITY_DN955_c0_g2	TRINITY_DN19556_c2_g1	TRINITY_DN16239_c0_g1	TRINITY_DN21448_c0_g1	TRINITY_DN23154_c2_g1	TRINITY_DN19469_c6_g1	TRINITY_DN47762_c4_g3	OG0000405	1	1	1	1	1	1	1	1	1	1	OG0000405	TRINITY_DN955_c0_g2	TRINITY_DN16239_c0_g1	TRINITY_DN47762_c4_g3	TRINITY_DN21448_c0_g1	TRINITY_DN23154_c2_g1	TRINITY_DN19556_c2_g1	TRINITY_DN19469_c6_g1
OG0000416	TRINITY_DN10733_c0_g1, TRINITY_DN2872_c0_g2	TRINITY_DN19152_c5_g1, TRINITY_DN19152_c5_g2	TRINITY_DN10430_c0_g1, TRINITY_DN5902_c1_g1	TRINITY_DN13742_c5_g1, TRINITY_DN18782_c2_g1	TRINITY_DN16515_c0_g1	TRINITY_DN23337_c10_g1, TRINITY_DN23487_c10_g2	TRINITY_DN20314_c2_g1, TRINITY_DN20314_c2_g3	TRINITY_DN16500_c0_g1, TRINITY_DN18653_c3_g1	TRINITY_DN42758_c0_g1, TRINITY_DN44420_c1_g3	OG0000416	2	2	2	2	1	2	2	2	2	0	OG0000416	TRINITY_DN2872_c0_g2	TRINITY_DN19152_c5_g1	TRINITY_DN5902_c1_g1	TRINITY_DN13742_c5_g1	TRINITY_DN16515_c0_g1	TRINITY_DN23487_c10_g2	TRINITY_DN20314_c2_g1	TRINITY_DN18653_c3_g1	TRINITY_DN44420_c1_g3	OG0000416	1	1	1	1	1	1	1	1	1	1	OG0000416	TRINITY_DN5902_c1_g1	TRINITY_DN16515_c0_g1	TRINITY_DN44420_c1_g3	TRINITY_DN23487_c10_g2	TRINITY_DN20314_c2_g1	TRINITY_DN13742_c5_g1	TRINITY_DN18653_c3_g1
OG0000417	TRINITY_DN2567_c0_g4	TRINITY_DN22386_c4_g2, TRINITY_DN22386_c4_g3, TRINITY_DN22386_c4_g4	TRINITY_DN1064_c6_g1	TRINITY_DN19410_c7_g1, TRINITY_DN20223_c11_g1	TRINITY_DN16742_c0_g1, TRINITY_DN19308_c2_g1	TRINITY_DN23456_c10_g1	TRINITY_DN19886_c3_g1, TRINITY_DN24500_c3_g1	TRINITY_DN17393_c0_g1, TRINITY_DN32734_c0_g1	TRINITY_DN45113_c1_g3, TRINITY_DN46678_c0_g1, TRINITY_DN57584_c0_g1	OG0000417	1	3	1	2	2	1	2	2	3	0	OG0000417	TRINITY_DN2567_c0_g4	TRINITY_DN22386_c4_g3	TRINITY_DN1064_c6_g1	TRINITY_DN19410_c7_g1	TRINITY_DN19308_c2_g1	TRINITY_DN23456_c10_g1	TRINITY_DN24500_c3_g1	TRINITY_DN17393_c0_g1	TRINITY_DN46678_c0_g1	OG0000417	1	1	1	1	1	1	1	1	1	1	OG0000417	TRINITY_DN1064_c6_g1	TRINITY_DN19308_c2_g1	TRINITY_DN46678_c0_g1	TRINITY_DN23456_c10_g1	TRINITY_DN24500_c3_g1	TRINITY_DN19410_c7_g1	TRINITY_DN17393_c0_g1
OG0000418	TRINITY_DN20775_c0_g2	TRINITY_DN21338_c5_g2, TRINITY_DN26998_c0_g1, TRINITY_DN46779_c0_g1	TRINITY_DN10758_c1_g2	TRINITY_DN10071_c0_g2, TRINITY_DN15960_c6_g1, TRINITY_DN18858_c4_g1	TRINITY_DN27631_c0_g1, TRINITY_DN33955_c0_g1	TRINITY_DN15172_c0_g1, TRINITY_DN24646_c2_g1, TRINITY_DN61446_c0_g1	TRINITY_DN19702_c3_g2	TRINITY_DN18007_c11_g1, TRINITY_DN46783_c0_g1	TRINITY_DN11051_c0_g1	OG0000418	1	3	1	3	2	3	1	2	1	0	OG0000418	TRINITY_DN20775_c0_g2	TRINITY_DN21338_c5_g2	TRINITY_DN10758_c1_g2	TRINITY_DN18858_c4_g1	TRINITY_DN33955_c0_g1	TRINITY_DN24646_c2_g1	TRINITY_DN19702_c3_g2	TRINITY_DN18007_c11_g1	TRINITY_DN11051_c0_g1	OG0000418	1	1	1	1	1	1	1	1	1	1	OG0000418	TRINITY_DN10758_c1_g2	TRINITY_DN33955_c0_g1	TRINITY_DN11051_c0_g1	TRINITY_DN24646_c2_g1	TRINITY_DN19702_c3_g2	TRINITY_DN18858_c4_g1	TRINITY_DN18007_c11_g1
OG0000423	TRINITY_DN13758_c0_g1	TRINITY_DN18982_c0_g1, TRINITY_DN18982_c0_g2	TRINITY_DN12886_c0_g1, TRINITY_DN12886_c1_g3, TRINITY_DN15058_c2_g2	TRINITY_DN19500_c0_g1	TRINITY_DN19648_c7_g1, TRINITY_DN19648_c7_g2	TRINITY_DN24431_c7_g2	TRINITY_DN19971_c4_g1, TRINITY_DN20838_c6_g1	TRINITY_DN18080_c11_g2, TRINITY_DN18080_c11_g3, TRINITY_DN18080_c11_g5	TRINITY_DN44174_c3_g1, TRINITY_DN59215_c0_g1	OG0000423	1	2	3	1	2	1	2	3	2	0	OG0000423	TRINITY_DN13758_c0_g1	TRINITY_DN18982_c0_g2	TRINITY_DN12886_c0_g1	TRINITY_DN19500_c0_g1	TRINITY_DN19648_c7_g2	TRINITY_DN24431_c7_g2	TRINITY_DN19971_c4_g1	TRINITY_DN18080_c11_g3	TRINITY_DN59215_c0_g1	OG0000423	1	1	1	1	1	1	1	1	1	1	OG0000423	TRINITY_DN12886_c0_g1	TRINITY_DN19648_c7_g2	TRINITY_DN59215_c0_g1	TRINITY_DN24431_c7_g2	TRINITY_DN19971_c4_g1	TRINITY_DN19500_c0_g1	TRINITY_DN18080_c11_g3
OG0000425	TRINITY_DN19371_c5_g1	TRINITY_DN21929_c5_g1, TRINITY_DN39268_c0_g1	TRINITY_DN13039_c0_g3, TRINITY_DN13039_c8_g2, TRINITY_DN13039_c8_g3	TRINITY_DN12225_c0_g1, TRINITY_DN12225_c0_g2, TRINITY_DN12225_c0_g7		TRINITY_DN24750_c1_g1, TRINITY_DN24750_c1_g2	TRINITY_DN25414_c0_g1, TRINITY_DN2947_c0_g1	TRINITY_DN19646_c2_g1, TRINITY_DN20217_c5_g1	TRINITY_DN46051_c0_g1, TRINITY_DN46051_c0_g3	OG0000425	1	2	3	3	0	2	2	2	2	0	OG0000425	TRINITY_DN19371_c5_g1	TRINITY_DN39268_c0_g1	TRINITY_DN13039_c8_g3	TRINITY_DN12225_c0_g7		TRINITY_DN24750_c1_g1	TRINITY_DN2947_c0_g1	TRINITY_DN20217_c5_g1	TRINITY_DN46051_c0_g1	OG0000425	1	1	1	1	0	1	1	1	1	0	OG0000425	TRINITY_DN13039_c8_g3	TRINITY_UK00000_c0_g1	TRINITY_DN46051_c0_g1	TRINITY_DN24750_c1_g1	TRINITY_DN2947_c0_g1	TRINITY_DN12225_c0_g7	TRINITY_DN20217_c5_g1
OG0000428	TRINITY_DN3623_c0_g1, TRINITY_DN4510_c1_g1	TRINITY_DN19535_c5_g1, TRINITY_DN19535_c6_g3	TRINITY_DN14284_c1_g1, TRINITY_DN16522_c0_g3	TRINITY_DN12437_c9_g1, TRINITY_DN19652_c4_g3	TRINITY_DN16348_c7_g1	TRINITY_DN20612_c0_g2, TRINITY_DN23497_c8_g7	TRINITY_DN23991_c4_g3, TRINITY_DN24257_c1_g1	TRINITY_DN19634_c1_g1, TRINITY_DN20593_c12_g1	TRINITY_DN42932_c6_g1, TRINITY_DN42971_c3_g3	OG0000428	2	2	2	2	1	2	2	2	2	0	OG0000428	TRINITY_DN3623_c0_g1	TRINITY_DN19535_c6_g3	TRINITY_DN14284_c1_g1	TRINITY_DN12437_c9_g1	TRINITY_DN16348_c7_g1	TRINITY_DN20612_c0_g2	TRINITY_DN24257_c1_g1	TRINITY_DN19634_c1_g1	TRINITY_DN42971_c3_g3	OG0000428	1	1	1	1	1	1	1	1	1	1	OG0000428	TRINITY_DN14284_c1_g1	TRINITY_DN16348_c7_g1	TRINITY_DN42971_c3_g3	TRINITY_DN20612_c0_g2	TRINITY_DN24257_c1_g1	TRINITY_DN12437_c9_g1	TRINITY_DN19634_c1_g1
OG0000430	TRINITY_DN185_c6_g1	TRINITY_DN22218_c5_g1	TRINITY_DN15104_c1_g1, TRINITY_DN4783_c0_g1	TRINITY_DN18930_c0_g3, TRINITY_DN20995_c4_g1	TRINITY_DN17341_c1_g6	TRINITY_DN23327_c5_g2, TRINITY_DN23883_c5_g2, TRINITY_DN23883_c5_g4	TRINITY_DN18399_c6_g1, TRINITY_DN22019_c9_g2	TRINITY_DN18828_c0_g1, TRINITY_DN19936_c5_g2, TRINITY_DN21010_c3_g1	TRINITY_DN39577_c0_g1, TRINITY_DN46935_c1_g2	OG0000430	1	1	2	2	1	3	2	3	2	0	OG0000430	TRINITY_DN185_c6_g1	TRINITY_DN22218_c5_g1	TRINITY_DN4783_c0_g1	TRINITY_DN20995_c4_g1	TRINITY_DN17341_c1_g6	TRINITY_DN23327_c5_g2	TRINITY_DN18399_c6_g1	TRINITY_DN19936_c5_g2	TRINITY_DN39577_c0_g1	OG0000430	1	1	1	1	1	1	1	1	1	1	OG0000430	TRINITY_DN4783_c0_g1	TRINITY_DN17341_c1_g6	TRINITY_DN39577_c0_g1	TRINITY_DN23327_c5_g2	TRINITY_DN18399_c6_g1	TRINITY_DN20995_c4_g1	TRINITY_DN19936_c5_g2
OG0000431	TRINITY_DN1605_c0_g1	TRINITY_DN23817_c7_g2, TRINITY_DN57417_c0_g1	TRINITY_DN15650_c0_g1, TRINITY_DN30975_c0_g1	TRINITY_DN19709_c6_g1	TRINITY_DN15781_c0_g1, TRINITY_DN15781_c0_g2, TRINITY_DN19115_c3_g1	TRINITY_DN22824_c1_g2, TRINITY_DN24013_c5_g1, TRINITY_DN28019_c0_g1	TRINITY_DN22549_c1_g1, TRINITY_DN46966_c0_g1	TRINITY_DN11987_c0_g1	TRINITY_DN44925_c0_g1, TRINITY_DN46012_c1_g1	OG0000431	1	2	2	1	3	3	2	1	2	0	OG0000431	TRINITY_DN1605_c0_g1	TRINITY_DN23817_c7_g2	TRINITY_DN15650_c0_g1	TRINITY_DN19709_c6_g1	TRINITY_DN15781_c0_g1	TRINITY_DN24013_c5_g1	TRINITY_DN22549_c1_g1	TRINITY_DN11987_c0_g1	TRINITY_DN44925_c0_g1	OG0000431	1	1	1	1	1	1	1	1	1	1	OG0000431	TRINITY_DN15650_c0_g1	TRINITY_DN15781_c0_g1	TRINITY_DN44925_c0_g1	TRINITY_DN24013_c5_g1	TRINITY_DN22549_c1_g1	TRINITY_DN19709_c6_g1	TRINITY_DN11987_c0_g1
OG0000432	TRINITY_DN6645_c0_g1		TRINITY_DN1576_c2_g2, TRINITY_DN1930_c0_g2, TRINITY_DN2550_c0_g3	TRINITY_DN18385_c2_g1, TRINITY_DN21162_c4_g1	TRINITY_DN18243_c0_g4, TRINITY_DN19309_c7_g1	TRINITY_DN23201_c5_g1, TRINITY_DN23349_c1_g3, TRINITY_DN24314_c11_g2	TRINITY_DN24287_c9_g1, TRINITY_DN24588_c6_g3	TRINITY_DN20979_c6_g3, TRINITY_DN21211_c4_g1	TRINITY_DN47479_c3_g1, TRINITY_DN47776_c0_g2	OG0000432	1	0	3	2	2	3	2	2	2	0	OG0000432	TRINITY_DN6645_c0_g1		TRINITY_DN2550_c0_g3	TRINITY_DN21162_c4_g1	TRINITY_DN18243_c0_g4	TRINITY_DN23201_c5_g1	TRINITY_DN24588_c6_g3	TRINITY_DN20979_c6_g3	TRINITY_DN47776_c0_g2	OG0000432	1	0	1	1	1	1	1	1	1	0	OG0000432	TRINITY_DN2550_c0_g3	TRINITY_DN18243_c0_g4	TRINITY_DN47776_c0_g2	TRINITY_DN23201_c5_g1	TRINITY_DN24588_c6_g3	TRINITY_DN21162_c4_g1	TRINITY_DN20979_c6_g3
OG0000433	TRINITY_DN1499_c0_g1	TRINITY_DN19452_c6_g1, TRINITY_DN22866_c3_g2, TRINITY_DN62296_c0_g1	TRINITY_DN15_c1_g2	TRINITY_DN16778_c6_g1, TRINITY_DN16941_c3_g2	TRINITY_DN19238_c2_g1, TRINITY_DN19601_c4_g5	TRINITY_DN22606_c8_g2, TRINITY_DN24402_c13_g1	TRINITY_DN19258_c2_g1, TRINITY_DN24834_c2_g1	TRINITY_DN17881_c9_g1, TRINITY_DN18517_c10_g1	TRINITY_DN45471_c3_g2, TRINITY_DN48488_c3_g2	OG0000433	1	3	1	2	2	2	2	2	2	0	OG0000433	TRINITY_DN1499_c0_g1	TRINITY_DN22866_c3_g2	TRINITY_DN15_c1_g2	TRINITY_DN16941_c3_g2	TRINITY_DN19238_c2_g1	TRINITY_DN22606_c8_g2	TRINITY_DN19258_c2_g1	TRINITY_DN18517_c10_g1	TRINITY_DN45471_c3_g2	OG0000433	1	1	1	1	1	1	1	1	1	1	OG0000433	TRINITY_DN15_c1_g2	TRINITY_DN19238_c2_g1	TRINITY_DN45471_c3_g2	TRINITY_DN22606_c8_g2	TRINITY_DN19258_c2_g1	TRINITY_DN16941_c3_g2	TRINITY_DN18517_c10_g1
OG0000434	TRINITY_DN3320_c0_g2, TRINITY_DN9637_c0_g1	TRINITY_DN20443_c2_g1, TRINITY_DN23463_c0_g1	TRINITY_DN16200_c1_g1, TRINITY_DN245_c11_g1	TRINITY_DN17390_c4_g1, TRINITY_DN19352_c7_g1	TRINITY_DN17900_c1_g5, TRINITY_DN19035_c8_g1	TRINITY_DN22854_c0_g1, TRINITY_DN24167_c3_g1	TRINITY_DN22210_c6_g2	TRINITY_DN17284_c0_g1, TRINITY_DN19023_c4_g1	TRINITY_DN44366_c0_g1, TRINITY_DN44958_c1_g1	OG0000434	2	2	2	2	2	2	1	2	2	0	OG0000434	TRINITY_DN3320_c0_g2	TRINITY_DN20443_c2_g1	TRINITY_DN245_c11_g1	TRINITY_DN19352_c7_g1	TRINITY_DN17900_c1_g5	TRINITY_DN22854_c0_g1	TRINITY_DN22210_c6_g2	TRINITY_DN19023_c4_g1	TRINITY_DN44958_c1_g1	OG0000434	1	1	1	1	1	1	1	1	1	1	OG0000434	TRINITY_DN245_c11_g1	TRINITY_DN17900_c1_g5	TRINITY_DN44958_c1_g1	TRINITY_DN22854_c0_g1	TRINITY_DN22210_c6_g2	TRINITY_DN19352_c7_g1	TRINITY_DN19023_c4_g1
OG0000435	TRINITY_DN15671_c0_g3	TRINITY_DN16869_c0_g1, TRINITY_DN18246_c6_g1	TRINITY_DN17057_c6_g1, TRINITY_DN17057_c7_g1	TRINITY_DN25482_c0_g1, TRINITY_DN36877_c0_g1, TRINITY_DN6296_c0_g1	TRINITY_DN25506_c0_g1, TRINITY_DN45467_c0_g1, TRINITY_DN46489_c0_g1	TRINITY_DN21455_c5_g2	TRINITY_DN21835_c10_g1	TRINITY_DN21061_c1_g1, TRINITY_DN21061_c1_g2, TRINITY_DN33035_c0_g1	TRINITY_DN74901_c0_g1	OG0000435	1	2	2	3	3	1	1	3	1	0	OG0000435	TRINITY_DN15671_c0_g3	TRINITY_DN16869_c0_g1	TRINITY_DN17057_c6_g1	TRINITY_DN36877_c0_g1	TRINITY_DN25506_c0_g1	TRINITY_DN21455_c5_g2	TRINITY_DN21835_c10_g1	TRINITY_DN21061_c1_g1	TRINITY_DN74901_c0_g1	OG0000435	1	1	1	1	1	1	1	1	1	1	OG0000435	TRINITY_DN17057_c6_g1	TRINITY_DN25506_c0_g1	TRINITY_DN74901_c0_g1	TRINITY_DN21455_c5_g2	TRINITY_DN21835_c10_g1	TRINITY_DN36877_c0_g1	TRINITY_DN21061_c1_g1
OG0000436	TRINITY_DN4056_c0_g1	TRINITY_DN20244_c7_g1, TRINITY_DN20403_c0_g1, TRINITY_DN25549_c0_g1	TRINITY_DN1743_c2_g1, TRINITY_DN1743_c4_g1, TRINITY_DN1743_c5_g1	TRINITY_DN15835_c5_g1, TRINITY_DN18279_c2_g2, TRINITY_DN18279_c2_g3	TRINITY_DN16256_c0_g1	TRINITY_DN22549_c3_g1	TRINITY_DN21543_c8_g1	TRINITY_DN19851_c1_g1, TRINITY_DN19851_c1_g2	TRINITY_DN44223_c0_g2, TRINITY_DN44223_c0_g3	OG0000436	1	3	3	3	1	1	1	2	2	0	OG0000436	TRINITY_DN4056_c0_g1	TRINITY_DN20403_c0_g1	TRINITY_DN1743_c2_g1	TRINITY_DN18279_c2_g2	TRINITY_DN16256_c0_g1	TRINITY_DN22549_c3_g1	TRINITY_DN21543_c8_g1	TRINITY_DN19851_c1_g1	TRINITY_DN44223_c0_g3	OG0000436	1	1	1	1	1	1	1	1	1	1	OG0000436	TRINITY_DN1743_c2_g1	TRINITY_DN16256_c0_g1	TRINITY_DN44223_c0_g3	TRINITY_DN22549_c3_g1	TRINITY_DN21543_c8_g1	TRINITY_DN18279_c2_g2	TRINITY_DN19851_c1_g1
OG0000438	TRINITY_DN2602_c2_g1	TRINITY_DN19066_c3_g1, TRINITY_DN23471_c9_g1	TRINITY_DN1785_c0_g1, TRINITY_DN2744_c0_g1	TRINITY_DN19134_c2_g1, TRINITY_DN21383_c7_g1	TRINITY_DN17107_c1_g3, TRINITY_DN19014_c3_g2	TRINITY_DN23372_c0_g1, TRINITY_DN24315_c3_g4	TRINITY_DN21968_c5_g1, TRINITY_DN23956_c4_g1	TRINITY_DN19269_c4_g2, TRINITY_DN19301_c1_g1	TRINITY_DN46791_c2_g1, TRINITY_DN48400_c1_g1	OG0000438	1	2	2	2	2	2	2	2	2	0	OG0000438	TRINITY_DN2602_c2_g1	TRINITY_DN23471_c9_g1	TRINITY_DN1785_c0_g1	TRINITY_DN21383_c7_g1	TRINITY_DN17107_c1_g3	TRINITY_DN23372_c0_g1	TRINITY_DN23956_c4_g1	TRINITY_DN19301_c1_g1	TRINITY_DN48400_c1_g1	OG0000438	1	1	1	1	1	1	1	1	1	1	OG0000438	TRINITY_DN1785_c0_g1	TRINITY_DN17107_c1_g3	TRINITY_DN48400_c1_g1	TRINITY_DN23372_c0_g1	TRINITY_DN23956_c4_g1	TRINITY_DN21383_c7_g1	TRINITY_DN19301_c1_g1
OG0000441	TRINITY_DN1002_c11_g1	TRINITY_DN20474_c2_g4	TRINITY_DN20955_c9_g1	TRINITY_DN8699_c0_g1, TRINITY_DN8699_c0_g2, TRINITY_DN9949_c0_g1	TRINITY_DN12218_c0_g2, TRINITY_DN37634_c0_g1, TRINITY_DN38077_c0_g1	TRINITY_DN24615_c1_g1	TRINITY_DN17680_c0_g1, TRINITY_DN41677_c0_g1, TRINITY_DN51020_c0_g1	TRINITY_DN14813_c0_g1, TRINITY_DN31628_c0_g1, TRINITY_DN39022_c0_g1	TRINITY_DN46600_c1_g1	OG0000441	1	1	1	3	3	1	3	3	1	0	OG0000441	TRINITY_DN1002_c11_g1	TRINITY_DN20474_c2_g4	TRINITY_DN20955_c9_g1	TRINITY_DN8699_c0_g1	TRINITY_DN37634_c0_g1	TRINITY_DN24615_c1_g1	TRINITY_DN51020_c0_g1	TRINITY_DN31628_c0_g1	TRINITY_DN46600_c1_g1	OG0000441	1	1	1	1	1	1	1	1	1	1	OG0000441	TRINITY_DN20955_c9_g1	TRINITY_DN37634_c0_g1	TRINITY_DN46600_c1_g1	TRINITY_DN24615_c1_g1	TRINITY_DN51020_c0_g1	TRINITY_DN8699_c0_g1	TRINITY_DN31628_c0_g1
OG0000442	TRINITY_DN16777_c0_g1	TRINITY_DN18815_c1_g3, TRINITY_DN22333_c0_g1	TRINITY_DN21142_c0_g1, TRINITY_DN587_c0_g2	TRINITY_DN20535_c7_g1, TRINITY_DN20535_c7_g2	TRINITY_DN16571_c3_g10, TRINITY_DN16571_c3_g2	TRINITY_DN23988_c4_g2, TRINITY_DN23988_c4_g4	TRINITY_DN24093_c5_g1, TRINITY_DN24093_c5_g2	TRINITY_DN17150_c0_g1, TRINITY_DN17766_c5_g8	TRINITY_DN44434_c4_g1, TRINITY_DN44434_c4_g2	OG0000442	1	2	2	2	2	2	2	2	2	0	OG0000442	TRINITY_DN16777_c0_g1	TRINITY_DN18815_c1_g3	TRINITY_DN587_c0_g2	TRINITY_DN20535_c7_g2	TRINITY_DN16571_c3_g10	TRINITY_DN23988_c4_g4	TRINITY_DN24093_c5_g2	TRINITY_DN17766_c5_g8	TRINITY_DN44434_c4_g2	OG0000442	1	1	1	1	1	1	1	1	1	1	OG0000442	TRINITY_DN587_c0_g2	TRINITY_DN16571_c3_g10	TRINITY_DN44434_c4_g2	TRINITY_DN23988_c4_g4	TRINITY_DN24093_c5_g2	TRINITY_DN20535_c7_g2	TRINITY_DN17766_c5_g8
OG0000446	TRINITY_DN4513_c0_g1	TRINITY_DN21176_c4_g1, TRINITY_DN58873_c0_g1	TRINITY_DN223_c0_g2	TRINITY_DN17111_c4_g1, TRINITY_DN18321_c12_g1	TRINITY_DN19767_c3_g1, TRINITY_DN19767_c3_g7	TRINITY_DN21753_c0_g1, TRINITY_DN21753_c0_g2, TRINITY_DN23637_c5_g1	TRINITY_DN19294_c6_g1, TRINITY_DN20974_c7_g1	TRINITY_DN19628_c9_g2, TRINITY_DN20305_c10_g1, TRINITY_DN20821_c3_g1	TRINITY_DN48812_c2_g1	OG0000446	1	2	1	2	2	3	2	3	1	0	OG0000446	TRINITY_DN4513_c0_g1	TRINITY_DN21176_c4_g1	TRINITY_DN223_c0_g2	TRINITY_DN17111_c4_g1	TRINITY_DN19767_c3_g1	TRINITY_DN23637_c5_g1	TRINITY_DN20974_c7_g1	TRINITY_DN20305_c10_g1	TRINITY_DN48812_c2_g1	OG0000446	1	1	1	1	1	1	1	1	1	1	OG0000446	TRINITY_DN223_c0_g2	TRINITY_DN19767_c3_g1	TRINITY_DN48812_c2_g1	TRINITY_DN23637_c5_g1	TRINITY_DN20974_c7_g1	TRINITY_DN17111_c4_g1	TRINITY_DN20305_c10_g1
OG0000450	TRINITY_DN33859_c2_g1, TRINITY_DN55708_c0_g1	TRINITY_DN22126_c7_g1	TRINITY_DN23900_c0_g1, TRINITY_DN23900_c3_g1	TRINITY_DN14595_c8_g1	TRINITY_DN12816_c0_g1, TRINITY_DN12816_c0_g2	TRINITY_DN22913_c1_g1	TRINITY_DN16684_c0_g1, TRINITY_DN16761_c0_g1, TRINITY_DN48341_c0_g1	TRINITY_DN16080_c0_g2, TRINITY_DN16080_c0_g3	TRINITY_DN23247_c0_g1, TRINITY_DN28484_c0_g1, TRINITY_DN28484_c0_g2	OG0000450	2	1	2	1	2	1	3	2	3	0	OG0000450	TRINITY_DN55708_c0_g1	TRINITY_DN22126_c7_g1	TRINITY_DN23900_c0_g1	TRINITY_DN14595_c8_g1	TRINITY_DN12816_c0_g2	TRINITY_DN22913_c1_g1	TRINITY_DN48341_c0_g1	TRINITY_DN16080_c0_g3	TRINITY_DN23247_c0_g1	OG0000450	1	1	1	1	1	1	1	1	1	1	OG0000450	TRINITY_DN23900_c0_g1	TRINITY_DN12816_c0_g2	TRINITY_DN23247_c0_g1	TRINITY_DN22913_c1_g1	TRINITY_DN48341_c0_g1	TRINITY_DN14595_c8_g1	TRINITY_DN16080_c0_g3
OG0000451	TRINITY_DN1099_c0_g1, TRINITY_DN1797_c0_g2	TRINITY_DN21286_c2_g2, TRINITY_DN23703_c3_g1	TRINITY_DN24176_c0_g2, TRINITY_DN296_c1_g1	TRINITY_DN13318_c7_g2, TRINITY_DN20367_c6_g1	TRINITY_DN16687_c2_g1, TRINITY_DN18425_c8_g1	TRINITY_DN20929_c0_g1, TRINITY_DN23693_c0_g2	TRINITY_DN23179_c2_g1, TRINITY_DN23447_c2_g1	TRINITY_DN20024_c3_g1	TRINITY_DN46043_c2_g1, TRINITY_DN46043_c3_g2	OG0000451	2	2	2	2	2	2	2	1	2	0	OG0000451	TRINITY_DN1099_c0_g1	TRINITY_DN23703_c3_g1	TRINITY_DN24176_c0_g2	TRINITY_DN13318_c7_g2	TRINITY_DN16687_c2_g1	TRINITY_DN20929_c0_g1	TRINITY_DN23447_c2_g1	TRINITY_DN20024_c3_g1	TRINITY_DN46043_c2_g1	OG0000451	1	1	1	1	1	1	1	1	1	1	OG0000451	TRINITY_DN24176_c0_g2	TRINITY_DN16687_c2_g1	TRINITY_DN46043_c2_g1	TRINITY_DN20929_c0_g1	TRINITY_DN23447_c2_g1	TRINITY_DN13318_c7_g2	TRINITY_DN20024_c3_g1
OG0000452	TRINITY_DN423_c4_g1	TRINITY_DN19161_c8_g1, TRINITY_DN23116_c10_g1	TRINITY_DN2417_c0_g2	TRINITY_DN14633_c2_g1, TRINITY_DN14633_c2_g6, TRINITY_DN17175_c6_g1	TRINITY_DN17444_c12_g2	TRINITY_DN23784_c4_g1, TRINITY_DN24741_c1_g3	TRINITY_DN22705_c2_g2, TRINITY_DN24757_c7_g1, TRINITY_DN25031_c3_g1	TRINITY_DN18459_c6_g1, TRINITY_DN19565_c4_g1	TRINITY_DN46375_c0_g1, TRINITY_DN47610_c3_g1	OG0000452	1	2	1	3	1	2	3	2	2	0	OG0000452	TRINITY_DN423_c4_g1	TRINITY_DN23116_c10_g1	TRINITY_DN2417_c0_g2	TRINITY_DN14633_c2_g6	TRINITY_DN17444_c12_g2	TRINITY_DN24741_c1_g3	TRINITY_DN25031_c3_g1	TRINITY_DN18459_c6_g1	TRINITY_DN46375_c0_g1	OG0000452	1	1	1	1	1	1	1	1	1	1	OG0000452	TRINITY_DN2417_c0_g2	TRINITY_DN17444_c12_g2	TRINITY_DN46375_c0_g1	TRINITY_DN24741_c1_g3	TRINITY_DN25031_c3_g1	TRINITY_DN14633_c2_g6	TRINITY_DN18459_c6_g1
OG0000453	TRINITY_DN251_c0_g2, TRINITY_DN4462_c1_g1	TRINITY_DN22451_c5_g1, TRINITY_DN64781_c0_g1	TRINITY_DN244_c5_g1, TRINITY_DN2482_c0_g1	TRINITY_DN18443_c3_g3	TRINITY_DN17684_c10_g2, TRINITY_DN19359_c5_g1	TRINITY_DN23039_c10_g1, TRINITY_DN23222_c3_g2	TRINITY_DN19151_c9_g1, TRINITY_DN22861_c10_g1	TRINITY_DN16714_c0_g1, TRINITY_DN18400_c4_g1	TRINITY_DN40592_c0_g1, TRINITY_DN45068_c0_g1	OG0000453	2	2	2	1	2	2	2	2	2	0	OG0000453	TRINITY_DN4462_c1_g1	TRINITY_DN22451_c5_g1	TRINITY_DN244_c5_g1	TRINITY_DN18443_c3_g3	TRINITY_DN17684_c10_g2	TRINITY_DN23039_c10_g1	TRINITY_DN22861_c10_g1	TRINITY_DN18400_c4_g1	TRINITY_DN45068_c0_g1	OG0000453	1	1	1	1	1	1	1	1	1	1	OG0000453	TRINITY_DN244_c5_g1	TRINITY_DN17684_c10_g2	TRINITY_DN45068_c0_g1	TRINITY_DN23039_c10_g1	TRINITY_DN22861_c10_g1	TRINITY_DN18443_c3_g3	TRINITY_DN18400_c4_g1
OG0000456	TRINITY_DN5619_c0_g4	TRINITY_DN19165_c7_g4, TRINITY_DN19165_c7_g6, TRINITY_DN21917_c4_g1	TRINITY_DN256_c1_g2	TRINITY_DN15177_c6_g1, TRINITY_DN17837_c10_g2	TRINITY_DN18786_c3_g12, TRINITY_DN18786_c3_g3, TRINITY_DN19008_c3_g9	TRINITY_DN24143_c4_g1, TRINITY_DN24710_c6_g1	TRINITY_DN23818_c3_g1	TRINITY_DN19854_c1_g1	TRINITY_DN45014_c1_g1, TRINITY_DN47211_c2_g4, TRINITY_DN47211_c2_g5	OG0000456	1	3	1	2	3	2	1	1	3	0	OG0000456	TRINITY_DN5619_c0_g4	TRINITY_DN19165_c7_g4	TRINITY_DN256_c1_g2	TRINITY_DN17837_c10_g2	TRINITY_DN19008_c3_g9	TRINITY_DN24710_c6_g1	TRINITY_DN23818_c3_g1	TRINITY_DN19854_c1_g1	TRINITY_DN45014_c1_g1	OG0000456	1	1	1	1	1	1	1	1	1	1	OG0000456	TRINITY_DN256_c1_g2	TRINITY_DN19008_c3_g9	TRINITY_DN45014_c1_g1	TRINITY_DN24710_c6_g1	TRINITY_DN23818_c3_g1	TRINITY_DN17837_c10_g2	TRINITY_DN19854_c1_g1
OG0000457	TRINITY_DN40_c4_g2, TRINITY_DN842_c2_g2	TRINITY_DN19540_c0_g1, TRINITY_DN19540_c2_g1, TRINITY_DN20628_c6_g2	TRINITY_DN257_c11_g2	TRINITY_DN18469_c4_g9, TRINITY_DN20521_c4_g1	TRINITY_DN16910_c8_g8, TRINITY_DN18200_c5_g1	TRINITY_DN20234_c0_g1, TRINITY_DN21761_c14_g2	TRINITY_DN20319_c8_g1, TRINITY_DN24389_c4_g2	TRINITY_DN18160_c6_g1	TRINITY_DN40825_c0_g1, TRINITY_DN47837_c6_g1	OG0000457	2	3	1	2	2	2	2	1	2	0	OG0000457	TRINITY_DN40_c4_g2	TRINITY_DN19540_c2_g1	TRINITY_DN257_c11_g2	TRINITY_DN20521_c4_g1	TRINITY_DN16910_c8_g8	TRINITY_DN21761_c14_g2	TRINITY_DN20319_c8_g1	TRINITY_DN18160_c6_g1	TRINITY_DN47837_c6_g1	OG0000457	1	1	1	1	1	1	1	1	1	1	OG0000457	TRINITY_DN257_c11_g2	TRINITY_DN16910_c8_g8	TRINITY_DN47837_c6_g1	TRINITY_DN21761_c14_g2	TRINITY_DN20319_c8_g1	TRINITY_DN20521_c4_g1	TRINITY_DN18160_c6_g1
OG0000458	TRINITY_DN2511_c0_g1	TRINITY_DN21610_c3_g2	TRINITY_DN261_c0_g1, TRINITY_DN261_c0_g3	TRINITY_DN19202_c1_g1, TRINITY_DN19483_c6_g1	TRINITY_DN18696_c3_g3, TRINITY_DN18696_c3_g6	TRINITY_DN22129_c5_g1	TRINITY_DN23047_c2_g1, TRINITY_DN23047_c2_g4	TRINITY_DN19847_c5_g15, TRINITY_DN19847_c5_g5, TRINITY_DN19847_c5_g6	TRINITY_DN42465_c0_g1, TRINITY_DN46693_c6_g1, TRINITY_DN46977_c3_g1	OG0000458	1	1	2	2	2	1	2	3	3	0	OG0000458	TRINITY_DN2511_c0_g1	TRINITY_DN21610_c3_g2	TRINITY_DN261_c0_g1	TRINITY_DN19483_c6_g1	TRINITY_DN18696_c3_g3	TRINITY_DN22129_c5_g1	TRINITY_DN23047_c2_g4	TRINITY_DN19847_c5_g5	TRINITY_DN42465_c0_g1	OG0000458	1	1	1	1	1	1	1	1	1	1	OG0000458	TRINITY_DN261_c0_g1	TRINITY_DN18696_c3_g3	TRINITY_DN42465_c0_g1	TRINITY_DN22129_c5_g1	TRINITY_DN23047_c2_g4	TRINITY_DN19483_c6_g1	TRINITY_DN19847_c5_g5
OG0000459	TRINITY_DN4354_c6_g1	TRINITY_DN11022_c0_g1, TRINITY_DN4175_c0_g1	TRINITY_DN2676_c1_g1, TRINITY_DN494_c3_g1	TRINITY_DN17553_c5_g1, TRINITY_DN6273_c0_g1	TRINITY_DN18217_c4_g1, TRINITY_DN18217_c4_g2	TRINITY_DN15075_c0_g1, TRINITY_DN24953_c1_g1	TRINITY_DN17681_c0_g1, TRINITY_DN23341_c4_g1, TRINITY_DN25584_c0_g1	TRINITY_DN17396_c0_g1, TRINITY_DN19267_c5_g1	TRINITY_DN42349_c1_g1	OG0000459	1	2	2	2	2	2	3	2	1	0	OG0000459	TRINITY_DN4354_c6_g1	TRINITY_DN4175_c0_g1	TRINITY_DN2676_c1_g1	TRINITY_DN17553_c5_g1	TRINITY_DN18217_c4_g1	TRINITY_DN24953_c1_g1	TRINITY_DN23341_c4_g1	TRINITY_DN19267_c5_g1	TRINITY_DN42349_c1_g1	OG0000459	1	1	1	1	1	1	1	1	1	1	OG0000459	TRINITY_DN2676_c1_g1	TRINITY_DN18217_c4_g1	TRINITY_DN42349_c1_g1	TRINITY_DN24953_c1_g1	TRINITY_DN23341_c4_g1	TRINITY_DN17553_c5_g1	TRINITY_DN19267_c5_g1
OG0000460	TRINITY_DN4984_c0_g1	TRINITY_DN23744_c6_g1	TRINITY_DN276_c1_g3, TRINITY_DN331_c11_g1	TRINITY_DN13975_c8_g4, TRINITY_DN16422_c4_g1, TRINITY_DN19536_c8_g1	TRINITY_DN18701_c1_g1, TRINITY_DN18936_c7_g1, TRINITY_DN19626_c4_g2	TRINITY_DN24581_c8_g1	TRINITY_DN22488_c3_g1, TRINITY_DN25158_c8_g1	TRINITY_DN18452_c7_g1, TRINITY_DN18782_c5_g7	TRINITY_DN40316_c0_g1, TRINITY_DN44363_c5_g1	OG0000460	1	1	2	3	3	1	2	2	2	0	OG0000460	TRINITY_DN4984_c0_g1	TRINITY_DN23744_c6_g1	TRINITY_DN331_c11_g1	TRINITY_DN13975_c8_g4	TRINITY_DN18936_c7_g1	TRINITY_DN24581_c8_g1	TRINITY_DN25158_c8_g1	TRINITY_DN18782_c5_g7	TRINITY_DN44363_c5_g1	OG0000460	1	1	1	1	1	1	1	1	1	1	OG0000460	TRINITY_DN331_c11_g1	TRINITY_DN18936_c7_g1	TRINITY_DN44363_c5_g1	TRINITY_DN24581_c8_g1	TRINITY_DN25158_c8_g1	TRINITY_DN13975_c8_g4	TRINITY_DN18782_c5_g7
OG0000465	TRINITY_DN1747_c1_g1, TRINITY_DN1747_c1_g2	TRINITY_DN21858_c4_g1, TRINITY_DN23325_c5_g1, TRINITY_DN54347_c0_g1	TRINITY_DN3105_c0_g1	TRINITY_DN19345_c7_g1	TRINITY_DN16697_c5_g2, TRINITY_DN17030_c5_g3	TRINITY_DN21399_c10_g3, TRINITY_DN23965_c6_g4	TRINITY_DN23267_c4_g1	TRINITY_DN19061_c4_g1, TRINITY_DN19061_c4_g2, TRINITY_DN19103_c5_g2	TRINITY_DN42830_c5_g1, TRINITY_DN47248_c4_g1	OG0000465	2	3	1	1	2	2	1	3	2	0	OG0000465	TRINITY_DN1747_c1_g1	TRINITY_DN23325_c5_g1	TRINITY_DN3105_c0_g1	TRINITY_DN19345_c7_g1	TRINITY_DN17030_c5_g3	TRINITY_DN23965_c6_g4	TRINITY_DN23267_c4_g1	TRINITY_DN19103_c5_g2	TRINITY_DN42830_c5_g1	OG0000465	1	1	1	1	1	1	1	1	1	1	OG0000465	TRINITY_DN3105_c0_g1	TRINITY_DN17030_c5_g3	TRINITY_DN42830_c5_g1	TRINITY_DN23965_c6_g4	TRINITY_DN23267_c4_g1	TRINITY_DN19345_c7_g1	TRINITY_DN19103_c5_g2
OG0000466	TRINITY_DN2139_c1_g3, TRINITY_DN2363_c2_g2	TRINITY_DN21936_c6_g6	TRINITY_DN3110_c0_g1, TRINITY_DN7949_c0_g2	TRINITY_DN13990_c7_g1, TRINITY_DN18044_c3_g1	TRINITY_DN16705_c2_g15, TRINITY_DN29765_c0_g1	TRINITY_DN21215_c0_g1, TRINITY_DN22247_c9_g1	TRINITY_DN16507_c0_g2, TRINITY_DN20815_c5_g2	TRINITY_DN19553_c9_g2, TRINITY_DN19894_c8_g1	TRINITY_DN39477_c0_g1, TRINITY_DN48092_c1_g1	OG0000466	2	1	2	2	2	2	2	2	2	0	OG0000466	TRINITY_DN2139_c1_g3	TRINITY_DN21936_c6_g6	TRINITY_DN3110_c0_g1	TRINITY_DN13990_c7_g1	TRINITY_DN16705_c2_g15	TRINITY_DN22247_c9_g1	TRINITY_DN20815_c5_g2	TRINITY_DN19553_c9_g2	TRINITY_DN48092_c1_g1	OG0000466	1	1	1	1	1	1	1	1	1	1	OG0000466	TRINITY_DN3110_c0_g1	TRINITY_DN16705_c2_g15	TRINITY_DN48092_c1_g1	TRINITY_DN22247_c9_g1	TRINITY_DN20815_c5_g2	TRINITY_DN13990_c7_g1	TRINITY_DN19553_c9_g2
OG0000467	TRINITY_DN2212_c1_g3	TRINITY_DN19702_c5_g1	TRINITY_DN3157_c0_g2, TRINITY_DN3633_c2_g1	TRINITY_DN14269_c0_g1	TRINITY_DN16524_c5_g2, TRINITY_DN16726_c3_g1	TRINITY_DN21441_c13_g2, TRINITY_DN23136_c3_g4, TRINITY_DN42739_c0_g1	TRINITY_DN23562_c3_g4, TRINITY_DN23678_c1_g3	TRINITY_DN18421_c1_g1, TRINITY_DN18421_c2_g1, TRINITY_DN20541_c4_g1	TRINITY_DN41154_c0_g1, TRINITY_DN46811_c2_g1	OG0000467	1	1	2	1	2	3	2	3	2	0	OG0000467	TRINITY_DN2212_c1_g3	TRINITY_DN19702_c5_g1	TRINITY_DN3633_c2_g1	TRINITY_DN14269_c0_g1	TRINITY_DN16726_c3_g1	TRINITY_DN21441_c13_g2	TRINITY_DN23678_c1_g3	TRINITY_DN18421_c1_g1	TRINITY_DN46811_c2_g1	OG0000467	1	1	1	1	1	1	1	1	1	1	OG0000467	TRINITY_DN3633_c2_g1	TRINITY_DN16726_c3_g1	TRINITY_DN46811_c2_g1	TRINITY_DN21441_c13_g2	TRINITY_DN23678_c1_g3	TRINITY_DN14269_c0_g1	TRINITY_DN18421_c1_g1
OG0000470	TRINITY_DN3905_c1_g2	TRINITY_DN23698_c6_g1	TRINITY_DN33380_c0_g1, TRINITY_DN33380_c5_g1	TRINITY_DN17158_c0_g1, TRINITY_DN22686_c0_g1	TRINITY_DN11507_c0_g1, TRINITY_DN11507_c0_g2	TRINITY_DN22175_c4_g2, TRINITY_DN7666_c0_g1	TRINITY_DN3564_c0_g1, TRINITY_DN4464_c0_g1, TRINITY_DN6755_c0_g2	TRINITY_DN13481_c0_g2, TRINITY_DN9408_c0_g2	TRINITY_DN26473_c0_g1, TRINITY_DN37711_c0_g1	OG0000470	1	1	2	2	2	2	3	2	2	0	OG0000470	TRINITY_DN3905_c1_g2	TRINITY_DN23698_c6_g1	TRINITY_DN33380_c0_g1	TRINITY_DN22686_c0_g1	TRINITY_DN11507_c0_g1	TRINITY_DN22175_c4_g2	TRINITY_DN6755_c0_g2	TRINITY_DN13481_c0_g2	TRINITY_DN37711_c0_g1	OG0000470	1	1	1	1	1	1	1	1	1	1	OG0000470	TRINITY_DN33380_c0_g1	TRINITY_DN11507_c0_g1	TRINITY_DN37711_c0_g1	TRINITY_DN22175_c4_g2	TRINITY_DN6755_c0_g2	TRINITY_DN22686_c0_g1	TRINITY_DN13481_c0_g2
OG0000471	TRINITY_DN16625_c0_g2, TRINITY_DN3779_c0_g1	TRINITY_DN23723_c5_g1, TRINITY_DN23912_c4_g1	TRINITY_DN3437_c0_g2, TRINITY_DN423_c0_g2	TRINITY_DN18322_c3_g1, TRINITY_DN28356_c0_g1	TRINITY_DN15669_c0_g1, TRINITY_DN15669_c0_g3, TRINITY_DN19599_c1_g2	TRINITY_DN20653_c0_g1, TRINITY_DN24726_c6_g1	TRINITY_DN18509_c14_g1, TRINITY_DN25173_c6_g1	TRINITY_DN20716_c4_g1	TRINITY_DN48664_c5_g1	OG0000471	2	2	2	2	3	2	2	1	1	0	OG0000471	TRINITY_DN3779_c0_g1	TRINITY_DN23912_c4_g1	TRINITY_DN423_c0_g2	TRINITY_DN18322_c3_g1	TRINITY_DN19599_c1_g2	TRINITY_DN24726_c6_g1	TRINITY_DN25173_c6_g1	TRINITY_DN20716_c4_g1	TRINITY_DN48664_c5_g1	OG0000471	1	1	1	1	1	1	1	1	1	1	OG0000471	TRINITY_DN423_c0_g2	TRINITY_DN19599_c1_g2	TRINITY_DN48664_c5_g1	TRINITY_DN24726_c6_g1	TRINITY_DN25173_c6_g1	TRINITY_DN18322_c3_g1	TRINITY_DN20716_c4_g1
OG0000473	TRINITY_DN273_c8_g4, TRINITY_DN5342_c1_g2	TRINITY_DN21675_c4_g2, TRINITY_DN21991_c1_g6, TRINITY_DN23376_c6_g5	TRINITY_DN3525_c4_g3	TRINITY_DN13932_c9_g1, TRINITY_DN18601_c3_g2, TRINITY_DN18601_c3_g3	TRINITY_DN17292_c3_g2, TRINITY_DN17754_c2_g1	TRINITY_DN22955_c2_g1	TRINITY_DN20535_c2_g1, TRINITY_DN23640_c9_g1	TRINITY_DN20035_c2_g4, TRINITY_DN21349_c6_g2	TRINITY_DN45439_c1_g1	OG0000473	2	3	1	3	2	1	2	2	1	0	OG0000473	TRINITY_DN273_c8_g4	TRINITY_DN21991_c1_g6	TRINITY_DN3525_c4_g3	TRINITY_DN18601_c3_g3	TRINITY_DN17292_c3_g2	TRINITY_DN22955_c2_g1	TRINITY_DN20535_c2_g1	TRINITY_DN20035_c2_g4	TRINITY_DN45439_c1_g1	OG0000473	1	1	1	1	1	1	1	1	1	1	OG0000473	TRINITY_DN3525_c4_g3	TRINITY_DN17292_c3_g2	TRINITY_DN45439_c1_g1	TRINITY_DN22955_c2_g1	TRINITY_DN20535_c2_g1	TRINITY_DN18601_c3_g3	TRINITY_DN20035_c2_g4
OG0000479	TRINITY_DN42026_c1_g1	TRINITY_DN22084_c12_g1	TRINITY_DN41295_c0_g1, TRINITY_DN41295_c2_g1	TRINITY_DN18658_c6_g2	TRINITY_DN15422_c0_g1, TRINITY_DN15422_c0_g2, TRINITY_DN5834_c0_g1	TRINITY_DN40321_c0_g1, TRINITY_DN7967_c0_g1, TRINITY_DN7967_c0_g2	TRINITY_DN23279_c6_g1, TRINITY_DN23279_c6_g2	TRINITY_DN17156_c0_g1	TRINITY_DN30347_c0_g1, TRINITY_DN32130_c0_g1, TRINITY_DN55887_c0_g1	OG0000479	1	1	2	1	3	3	2	1	3	0	OG0000479	TRINITY_DN42026_c1_g1	TRINITY_DN22084_c12_g1	TRINITY_DN41295_c2_g1	TRINITY_DN18658_c6_g2	TRINITY_DN15422_c0_g1	TRINITY_DN7967_c0_g2	TRINITY_DN23279_c6_g2	TRINITY_DN17156_c0_g1	TRINITY_DN32130_c0_g1	OG0000479	1	1	1	1	1	1	1	1	1	1	OG0000479	TRINITY_DN41295_c2_g1	TRINITY_DN15422_c0_g1	TRINITY_DN32130_c0_g1	TRINITY_DN7967_c0_g2	TRINITY_DN23279_c6_g2	TRINITY_DN18658_c6_g2	TRINITY_DN17156_c0_g1
OG0000480	TRINITY_DN5632_c0_g2	TRINITY_DN22911_c7_g1, TRINITY_DN33021_c0_g1	TRINITY_DN415_c0_g2, TRINITY_DN500_c13_g1	TRINITY_DN14597_c4_g1, TRINITY_DN19759_c3_g3	TRINITY_DN17514_c4_g1, TRINITY_DN17514_c4_g7	TRINITY_DN21705_c4_g2, TRINITY_DN23512_c6_g3	TRINITY_DN20912_c7_g1, TRINITY_DN23076_c0_g1	TRINITY_DN20282_c6_g3, TRINITY_DN21159_c7_g1	TRINITY_DN45096_c6_g1, TRINITY_DN47408_c4_g2	OG0000480	1	2	2	2	2	2	2	2	2	0	OG0000480	TRINITY_DN5632_c0_g2	TRINITY_DN22911_c7_g1	TRINITY_DN415_c0_g2	TRINITY_DN19759_c3_g3	TRINITY_DN17514_c4_g7	TRINITY_DN21705_c4_g2	TRINITY_DN23076_c0_g1	TRINITY_DN20282_c6_g3	TRINITY_DN45096_c6_g1	OG0000480	1	1	1	1	1	1	1	1	1	1	OG0000480	TRINITY_DN415_c0_g2	TRINITY_DN17514_c4_g7	TRINITY_DN45096_c6_g1	TRINITY_DN21705_c4_g2	TRINITY_DN23076_c0_g1	TRINITY_DN19759_c3_g3	TRINITY_DN20282_c6_g3
OG0000484	TRINITY_DN4737_c0_g3, TRINITY_DN963_c0_g2	TRINITY_DN23188_c8_g10, TRINITY_DN23407_c4_g1	TRINITY_DN5395_c0_g2, TRINITY_DN833_c5_g1	TRINITY_DN16456_c6_g2, TRINITY_DN18467_c3_g2	TRINITY_DN17018_c4_g1, TRINITY_DN17290_c4_g1	TRINITY_DN22017_c7_g1, TRINITY_DN23035_c6_g1	TRINITY_DN22898_c8_g3	TRINITY_DN18693_c2_g5, TRINITY_DN19056_c8_g1	TRINITY_DN44604_c1_g1, TRINITY_DN45239_c0_g2	OG0000484	2	2	2	2	2	2	1	2	2	0	OG0000484	TRINITY_DN4737_c0_g3	TRINITY_DN23407_c4_g1	TRINITY_DN5395_c0_g2	TRINITY_DN18467_c3_g2	TRINITY_DN17018_c4_g1	TRINITY_DN22017_c7_g1	TRINITY_DN22898_c8_g3	TRINITY_DN18693_c2_g5	TRINITY_DN45239_c0_g2	OG0000484	1	1	1	1	1	1	1	1	1	1	OG0000484	TRINITY_DN5395_c0_g2	TRINITY_DN17018_c4_g1	TRINITY_DN45239_c0_g2	TRINITY_DN22017_c7_g1	TRINITY_DN22898_c8_g3	TRINITY_DN18467_c3_g2	TRINITY_DN18693_c2_g5
OG0000485	TRINITY_DN17855_c0_g1, TRINITY_DN18105_c1_g1, TRINITY_DN25047_c1_g1	TRINITY_DN19055_c11_g1, TRINITY_DN23850_c8_g2, TRINITY_DN24242_c0_g1	TRINITY_DN5483_c0_g1	TRINITY_DN13777_c7_g2, TRINITY_DN16466_c5_g3	TRINITY_DN19794_c4_g1	TRINITY_DN22685_c6_g1, TRINITY_DN24098_c12_g3	TRINITY_DN17740_c0_g2, TRINITY_DN24830_c1_g2	TRINITY_DN18537_c1_g1, TRINITY_DN18566_c6_g2	TRINITY_DN41572_c0_g1	OG0000485	3	3	1	2	1	2	2	2	1	0	OG0000485	TRINITY_DN17855_c0_g1	TRINITY_DN19055_c11_g1	TRINITY_DN5483_c0_g1	TRINITY_DN13777_c7_g2	TRINITY_DN19794_c4_g1	TRINITY_DN24098_c12_g3	TRINITY_DN17740_c0_g2	TRINITY_DN18566_c6_g2	TRINITY_DN41572_c0_g1	OG0000485	1	1	1	1	1	1	1	1	1	1	OG0000485	TRINITY_DN5483_c0_g1	TRINITY_DN19794_c4_g1	TRINITY_DN41572_c0_g1	TRINITY_DN24098_c12_g3	TRINITY_DN17740_c0_g2	TRINITY_DN13777_c7_g2	TRINITY_DN18566_c6_g2
OG0000487	TRINITY_DN1176_c0_g3, TRINITY_DN8942_c0_g1	TRINITY_DN21567_c7_g4, TRINITY_DN21886_c3_g1, TRINITY_DN56846_c0_g1	TRINITY_DN580_c3_g1	TRINITY_DN14394_c7_g1	TRINITY_DN19274_c10_g12, TRINITY_DN19309_c6_g2	TRINITY_DN22303_c6_g1, TRINITY_DN24154_c9_g1	TRINITY_DN21942_c4_g2, TRINITY_DN25067_c4_g2	TRINITY_DN19776_c7_g2, TRINITY_DN19872_c5_g1	TRINITY_DN45686_c9_g1, TRINITY_DN48703_c3_g2	OG0000487	2	3	1	1	2	2	2	2	2	0	OG0000487	TRINITY_DN8942_c0_g1	TRINITY_DN21567_c7_g4	TRINITY_DN580_c3_g1	TRINITY_DN14394_c7_g1	TRINITY_DN19274_c10_g12	TRINITY_DN24154_c9_g1	TRINITY_DN21942_c4_g2	TRINITY_DN19776_c7_g2	TRINITY_DN48703_c3_g2	OG0000487	1	1	1	1	1	1	1	1	1	1	OG0000487	TRINITY_DN580_c3_g1	TRINITY_DN19274_c10_g12	TRINITY_DN48703_c3_g2	TRINITY_DN24154_c9_g1	TRINITY_DN21942_c4_g2	TRINITY_DN14394_c7_g1	TRINITY_DN19776_c7_g2
OG0000488	TRINITY_DN1268_c0_g1, TRINITY_DN1967_c0_g4	TRINITY_DN23264_c5_g1, TRINITY_DN51831_c0_g1	TRINITY_DN623_c0_g1	TRINITY_DN18138_c2_g1, TRINITY_DN18889_c6_g7, TRINITY_DN21392_c2_g1	TRINITY_DN19514_c5_g1	TRINITY_DN24409_c7_g4, TRINITY_DN24901_c8_g1	TRINITY_DN24367_c2_g2	TRINITY_DN17836_c3_g2, TRINITY_DN19203_c6_g1, TRINITY_DN20880_c6_g1	TRINITY_DN46547_c2_g2, TRINITY_DN47442_c1_g1	OG0000488	2	2	1	3	1	2	1	3	2	0	OG0000488	TRINITY_DN1268_c0_g1	TRINITY_DN23264_c5_g1	TRINITY_DN623_c0_g1	TRINITY_DN21392_c2_g1	TRINITY_DN19514_c5_g1	TRINITY_DN24901_c8_g1	TRINITY_DN24367_c2_g2	TRINITY_DN20880_c6_g1	TRINITY_DN46547_c2_g2	OG0000488	1	1	1	1	1	1	1	1	1	1	OG0000488	TRINITY_DN623_c0_g1	TRINITY_DN19514_c5_g1	TRINITY_DN46547_c2_g2	TRINITY_DN24901_c8_g1	TRINITY_DN24367_c2_g2	TRINITY_DN21392_c2_g1	TRINITY_DN20880_c6_g1
OG0000491	TRINITY_DN2928_c0_g1	TRINITY_DN19412_c7_g2, TRINITY_DN50058_c0_g1, TRINITY_DN52901_c0_g1	TRINITY_DN7785_c0_g2	TRINITY_DN14371_c3_g1, TRINITY_DN16931_c8_g1	TRINITY_DN17678_c4_g1, TRINITY_DN19427_c10_g1	TRINITY_DN21986_c8_g4, TRINITY_DN24129_c8_g3	TRINITY_DN19186_c8_g1, TRINITY_DN21601_c7_g1	TRINITY_DN19622_c4_g2, TRINITY_DN19948_c0_g1	TRINITY_DN46269_c6_g2, TRINITY_DN48016_c4_g2	OG0000491	1	3	1	2	2	2	2	2	2	0	OG0000491	TRINITY_DN2928_c0_g1	TRINITY_DN19412_c7_g2	TRINITY_DN7785_c0_g2	TRINITY_DN14371_c3_g1	TRINITY_DN17678_c4_g1	TRINITY_DN24129_c8_g3	TRINITY_DN19186_c8_g1	TRINITY_DN19622_c4_g2	TRINITY_DN48016_c4_g2	OG0000491	1	1	1	1	1	1	1	1	1	1	OG0000491	TRINITY_DN7785_c0_g2	TRINITY_DN17678_c4_g1	TRINITY_DN48016_c4_g2	TRINITY_DN24129_c8_g3	TRINITY_DN19186_c8_g1	TRINITY_DN14371_c3_g1	TRINITY_DN19622_c4_g2
OG0000492	TRINITY_DN131_c0_g4, TRINITY_DN2995_c0_g1	TRINITY_DN18724_c6_g1, TRINITY_DN23381_c6_g1	TRINITY_DN851_c9_g1	TRINITY_DN16509_c2_g1, TRINITY_DN20289_c6_g3	TRINITY_DN18314_c2_g1, TRINITY_DN18367_c1_g1	TRINITY_DN24149_c10_g1, TRINITY_DN24549_c7_g1	TRINITY_DN19429_c1_g2, TRINITY_DN24760_c3_g2	TRINITY_DN19399_c7_g1, TRINITY_DN21090_c5_g3	TRINITY_DN47395_c2_g2, TRINITY_DN48641_c2_g1	OG0000492	2	2	1	2	2	2	2	2	2	0	OG0000492	TRINITY_DN2995_c0_g1	TRINITY_DN23381_c6_g1	TRINITY_DN851_c9_g1	TRINITY_DN16509_c2_g1	TRINITY_DN18314_c2_g1	TRINITY_DN24549_c7_g1	TRINITY_DN24760_c3_g2	TRINITY_DN21090_c5_g3	TRINITY_DN48641_c2_g1	OG0000492	1	1	1	1	1	1	1	1	1	1	OG0000492	TRINITY_DN851_c9_g1	TRINITY_DN18314_c2_g1	TRINITY_DN48641_c2_g1	TRINITY_DN24549_c7_g1	TRINITY_DN24760_c3_g2	TRINITY_DN16509_c2_g1	TRINITY_DN21090_c5_g3
OG0000505	TRINITY_DN662_c3_g1	TRINITY_DN23575_c2_g1, TRINITY_DN23575_c2_g3	TRINITY_DN106_c0_g1	TRINITY_DN16906_c3_g1, TRINITY_DN21202_c4_g1	TRINITY_DN19704_c3_g1	TRINITY_DN24491_c3_g1, TRINITY_DN24741_c1_g1	TRINITY_DN21778_c1_g2, TRINITY_DN25197_c5_g2	TRINITY_DN21187_c1_g3, TRINITY_DN21375_c5_g2	TRINITY_DN38120_c0_g1, TRINITY_DN48775_c1_g2, TRINITY_DN49001_c6_g2	OG0000505	1	2	1	2	1	2	2	2	3	0	OG0000505	TRINITY_DN662_c3_g1	TRINITY_DN23575_c2_g1	TRINITY_DN106_c0_g1	TRINITY_DN16906_c3_g1	TRINITY_DN19704_c3_g1	TRINITY_DN24741_c1_g1	TRINITY_DN25197_c5_g2	TRINITY_DN21375_c5_g2	TRINITY_DN48775_c1_g2	OG0000505	1	1	1	1	1	1	1	1	1	1	OG0000505	TRINITY_DN106_c0_g1	TRINITY_DN19704_c3_g1	TRINITY_DN48775_c1_g2	TRINITY_DN24741_c1_g1	TRINITY_DN25197_c5_g2	TRINITY_DN16906_c3_g1	TRINITY_DN21375_c5_g2
OG0000506	TRINITY_DN443_c0_g2, TRINITY_DN838_c0_g1	TRINITY_DN20886_c3_g1, TRINITY_DN21132_c3_g1	TRINITY_DN10744_c0_g2, TRINITY_DN2647_c0_g2	TRINITY_DN15115_c0_g1	TRINITY_DN18495_c0_g4, TRINITY_DN18576_c1_g1	TRINITY_DN22824_c1_g3	TRINITY_DN19148_c0_g1, TRINITY_DN23359_c6_g1	TRINITY_DN18310_c1_g1, TRINITY_DN18310_c3_g2	TRINITY_DN42979_c0_g1, TRINITY_DN46751_c0_g1	OG0000506	2	2	2	1	2	1	2	2	2	0	OG0000506	TRINITY_DN443_c0_g2	TRINITY_DN20886_c3_g1	TRINITY_DN10744_c0_g2	TRINITY_DN15115_c0_g1	TRINITY_DN18495_c0_g4	TRINITY_DN22824_c1_g3	TRINITY_DN19148_c0_g1	TRINITY_DN18310_c3_g2	TRINITY_DN46751_c0_g1	OG0000506	1	1	1	1	1	1	1	1	1	1	OG0000506	TRINITY_DN10744_c0_g2	TRINITY_DN18495_c0_g4	TRINITY_DN46751_c0_g1	TRINITY_DN22824_c1_g3	TRINITY_DN19148_c0_g1	TRINITY_DN15115_c0_g1	TRINITY_DN18310_c3_g2
OG0000509	TRINITY_DN330_c0_g1	TRINITY_DN18548_c0_g6, TRINITY_DN23704_c7_g2, TRINITY_DN2620_c0_g1	TRINITY_DN10_c0_g2	TRINITY_DN16704_c5_g2, TRINITY_DN16920_c5_g4	TRINITY_DN17310_c2_g4	TRINITY_DN23191_c7_g1, TRINITY_DN23191_c7_g5, TRINITY_DN23323_c5_g1	TRINITY_DN23163_c5_g2	TRINITY_DN18279_c7_g1, TRINITY_DN21168_c2_g2	TRINITY_DN42773_c2_g1, TRINITY_DN48930_c3_g1	OG0000509	1	3	1	2	1	3	1	2	2	0	OG0000509	TRINITY_DN330_c0_g1	TRINITY_DN18548_c0_g6	TRINITY_DN10_c0_g2	TRINITY_DN16920_c5_g4	TRINITY_DN17310_c2_g4	TRINITY_DN23191_c7_g1	TRINITY_DN23163_c5_g2	TRINITY_DN18279_c7_g1	TRINITY_DN48930_c3_g1	OG0000509	1	1	1	1	1	1	1	1	1	1	OG0000509	TRINITY_DN10_c0_g2	TRINITY_DN17310_c2_g4	TRINITY_DN48930_c3_g1	TRINITY_DN23191_c7_g1	TRINITY_DN23163_c5_g2	TRINITY_DN16920_c5_g4	TRINITY_DN18279_c7_g1
OG0000510	TRINITY_DN21529_c0_g1, TRINITY_DN21529_c5_g1, TRINITY_DN54550_c1_g1	TRINITY_DN21331_c0_g1	TRINITY_DN11833_c4_g1, TRINITY_DN11833_c8_g1	TRINITY_DN19645_c2_g1	TRINITY_DN18322_c2_g4	TRINITY_DN10656_c0_g1, TRINITY_DN26582_c0_g1	TRINITY_DN23974_c0_g1	TRINITY_DN15814_c0_g2, TRINITY_DN34496_c0_g1, TRINITY_DN43592_c0_g1	TRINITY_DN2889_c0_g1, TRINITY_DN37827_c0_g1	OG0000510	3	1	2	1	1	2	1	3	2	0	OG0000510	TRINITY_DN21529_c5_g1	TRINITY_DN21331_c0_g1	TRINITY_DN11833_c8_g1	TRINITY_DN19645_c2_g1	TRINITY_DN18322_c2_g4	TRINITY_DN26582_c0_g1	TRINITY_DN23974_c0_g1	TRINITY_DN43592_c0_g1	TRINITY_DN2889_c0_g1	OG0000510	1	1	1	1	1	1	1	1	1	1	OG0000510	TRINITY_DN11833_c8_g1	TRINITY_DN18322_c2_g4	TRINITY_DN2889_c0_g1	TRINITY_DN26582_c0_g1	TRINITY_DN23974_c0_g1	TRINITY_DN19645_c2_g1	TRINITY_DN43592_c0_g1
OG0000512	TRINITY_DN4328_c5_g2	TRINITY_DN20559_c1_g1, TRINITY_DN20559_c1_g2, TRINITY_DN23955_c3_g1	TRINITY_DN12155_c1_g2, TRINITY_DN12155_c5_g1	TRINITY_DN11499_c1_g1, TRINITY_DN22960_c0_g1, TRINITY_DN9387_c0_g2		TRINITY_DN22273_c6_g1	TRINITY_DN23169_c6_g1, TRINITY_DN36999_c0_g1	TRINITY_DN21105_c7_g5, TRINITY_DN9607_c0_g1	TRINITY_DN46114_c3_g1, TRINITY_DN46470_c5_g1	OG0000512	1	3	2	3	0	1	2	2	2	0	OG0000512	TRINITY_DN4328_c5_g2	TRINITY_DN23955_c3_g1	TRINITY_DN12155_c1_g2	TRINITY_DN9387_c0_g2		TRINITY_DN22273_c6_g1	TRINITY_DN36999_c0_g1	TRINITY_DN9607_c0_g1	TRINITY_DN46470_c5_g1	OG0000512	1	1	1	1	0	1	1	1	1	0	OG0000512	TRINITY_DN12155_c1_g2	TRINITY_UK00000_c0_g1	TRINITY_DN46470_c5_g1	TRINITY_DN22273_c6_g1	TRINITY_DN36999_c0_g1	TRINITY_DN9387_c0_g2	TRINITY_DN9607_c0_g1
OG0000519	TRINITY_DN1214_c1_g1	TRINITY_DN20722_c5_g1, TRINITY_DN21805_c8_g1	TRINITY_DN1455_c0_g2	TRINITY_DN13952_c6_g1, TRINITY_DN17747_c6_g1	TRINITY_DN18620_c7_g1, TRINITY_DN18620_c7_g2	TRINITY_DN24740_c4_g1	TRINITY_DN21502_c5_g2, TRINITY_DN21969_c8_g1, TRINITY_DN23662_c10_g2	TRINITY_DN20095_c3_g15, TRINITY_DN20095_c3_g2	TRINITY_DN39984_c0_g1, TRINITY_DN48808_c2_g1	OG0000519	1	2	1	2	2	1	3	2	2	0	OG0000519	TRINITY_DN1214_c1_g1	TRINITY_DN21805_c8_g1	TRINITY_DN1455_c0_g2	TRINITY_DN17747_c6_g1	TRINITY_DN18620_c7_g1	TRINITY_DN24740_c4_g1	TRINITY_DN23662_c10_g2	TRINITY_DN20095_c3_g2	TRINITY_DN48808_c2_g1	OG0000519	1	1	1	1	1	1	1	1	1	1	OG0000519	TRINITY_DN1455_c0_g2	TRINITY_DN18620_c7_g1	TRINITY_DN48808_c2_g1	TRINITY_DN24740_c4_g1	TRINITY_DN23662_c10_g2	TRINITY_DN17747_c6_g1	TRINITY_DN20095_c3_g2
OG0000520	TRINITY_DN124_c1_g1, TRINITY_DN5742_c0_g1	TRINITY_DN18544_c4_g3, TRINITY_DN20507_c3_g4	TRINITY_DN149_c2_g1	TRINITY_DN12758_c3_g2, TRINITY_DN19581_c1_g1	TRINITY_DN17976_c2_g1, TRINITY_DN17976_c2_g3	TRINITY_DN22013_c9_g1, TRINITY_DN23564_c8_g2	TRINITY_DN21199_c6_g1, TRINITY_DN23426_c8_g1	TRINITY_DN19691_c6_g4	TRINITY_DN36555_c0_g1, TRINITY_DN48950_c1_g2	OG0000520	2	2	1	2	2	2	2	1	2	0	OG0000520	TRINITY_DN124_c1_g1	TRINITY_DN18544_c4_g3	TRINITY_DN149_c2_g1	TRINITY_DN19581_c1_g1	TRINITY_DN17976_c2_g1	TRINITY_DN23564_c8_g2	TRINITY_DN23426_c8_g1	TRINITY_DN19691_c6_g4	TRINITY_DN48950_c1_g2	OG0000520	1	1	1	1	1	1	1	1	1	1	OG0000520	TRINITY_DN149_c2_g1	TRINITY_DN17976_c2_g1	TRINITY_DN48950_c1_g2	TRINITY_DN23564_c8_g2	TRINITY_DN23426_c8_g1	TRINITY_DN19581_c1_g1	TRINITY_DN19691_c6_g4
OG0000522	TRINITY_DN265_c0_g3	TRINITY_DN12684_c0_g1, TRINITY_DN17420_c0_g2, TRINITY_DN23795_c6_g3	TRINITY_DN155_c0_g1	TRINITY_DN12616_c5_g1, TRINITY_DN14782_c12_g2, TRINITY_DN20707_c9_g1	TRINITY_DN19734_c6_g1, TRINITY_DN19734_c6_g4	TRINITY_DN21917_c10_g1, TRINITY_DN24816_c7_g1	TRINITY_DN25171_c4_g1	TRINITY_DN20910_c3_g2	TRINITY_DN46914_c1_g1, TRINITY_DN48792_c5_g1	OG0000522	1	3	1	3	2	2	1	1	2	0	OG0000522	TRINITY_DN265_c0_g3	TRINITY_DN23795_c6_g3	TRINITY_DN155_c0_g1	TRINITY_DN14782_c12_g2	TRINITY_DN19734_c6_g1	TRINITY_DN24816_c7_g1	TRINITY_DN25171_c4_g1	TRINITY_DN20910_c3_g2	TRINITY_DN46914_c1_g1	OG0000522	1	1	1	1	1	1	1	1	1	1	OG0000522	TRINITY_DN155_c0_g1	TRINITY_DN19734_c6_g1	TRINITY_DN46914_c1_g1	TRINITY_DN24816_c7_g1	TRINITY_DN25171_c4_g1	TRINITY_DN14782_c12_g2	TRINITY_DN20910_c3_g2
OG0000524	TRINITY_DN2623_c3_g1	TRINITY_DN20648_c9_g1, TRINITY_DN52522_c0_g1	TRINITY_DN15_c4_g1, TRINITY_DN23658_c0_g1	TRINITY_DN17352_c4_g1	TRINITY_DN18552_c2_g1, TRINITY_DN19437_c1_g2	TRINITY_DN23153_c5_g2, TRINITY_DN23567_c8_g1	TRINITY_DN23305_c7_g1, TRINITY_DN25106_c8_g2	TRINITY_DN19740_c8_g2, TRINITY_DN20867_c6_g2	TRINITY_DN41452_c0_g1, TRINITY_DN42004_c2_g1	OG0000524	1	2	2	1	2	2	2	2	2	0	OG0000524	TRINITY_DN2623_c3_g1	TRINITY_DN20648_c9_g1	TRINITY_DN23658_c0_g1	TRINITY_DN17352_c4_g1	TRINITY_DN18552_c2_g1	TRINITY_DN23153_c5_g2	TRINITY_DN25106_c8_g2	TRINITY_DN20867_c6_g2	TRINITY_DN42004_c2_g1	OG0000524	1	1	1	1	1	1	1	1	1	1	OG0000524	TRINITY_DN23658_c0_g1	TRINITY_DN18552_c2_g1	TRINITY_DN42004_c2_g1	TRINITY_DN23153_c5_g2	TRINITY_DN25106_c8_g2	TRINITY_DN17352_c4_g1	TRINITY_DN20867_c6_g2
OG0000525	TRINITY_DN2537_c1_g1	TRINITY_DN19998_c9_g1, TRINITY_DN22486_c4_g6	TRINITY_DN1662_c3_g3	TRINITY_DN14140_c10_g1, TRINITY_DN18255_c13_g1	TRINITY_DN17151_c1_g1, TRINITY_DN19757_c11_g2	TRINITY_DN24295_c13_g1	TRINITY_DN21378_c4_g1, TRINITY_DN21378_c4_g2, TRINITY_DN23523_c6_g2	TRINITY_DN18517_c16_g1, TRINITY_DN18679_c4_g2, TRINITY_DN18679_c4_g3	TRINITY_DN45017_c0_g1	OG0000525	1	2	1	2	2	1	3	3	1	0	OG0000525	TRINITY_DN2537_c1_g1	TRINITY_DN22486_c4_g6	TRINITY_DN1662_c3_g3	TRINITY_DN18255_c13_g1	TRINITY_DN17151_c1_g1	TRINITY_DN24295_c13_g1	TRINITY_DN21378_c4_g1	TRINITY_DN18517_c16_g1	TRINITY_DN45017_c0_g1	OG0000525	1	1	1	1	1	1	1	1	1	1	OG0000525	TRINITY_DN1662_c3_g3	TRINITY_DN17151_c1_g1	TRINITY_DN45017_c0_g1	TRINITY_DN24295_c13_g1	TRINITY_DN21378_c4_g1	TRINITY_DN18255_c13_g1	TRINITY_DN18517_c16_g1
OG0000526	TRINITY_DN22957_c0_g2, TRINITY_DN22957_c1_g1	TRINITY_DN18965_c8_g1, TRINITY_DN23189_c6_g1	TRINITY_DN16950_c0_g1, TRINITY_DN16950_c2_g1	TRINITY_DN12956_c2_g3	TRINITY_DN13660_c0_g1	TRINITY_DN19092_c0_g1, TRINITY_DN19423_c0_g1	TRINITY_DN15741_c0_g1, TRINITY_DN5647_c0_g1	TRINITY_DN18926_c6_g1	TRINITY_DN73_c0_g1, TRINITY_DN79538_c0_g1, TRINITY_DN92652_c0_g1	OG0000526	2	2	2	1	1	2	2	1	3	0	OG0000526	TRINITY_DN22957_c0_g2	TRINITY_DN23189_c6_g1	TRINITY_DN16950_c2_g1	TRINITY_DN12956_c2_g3	TRINITY_DN13660_c0_g1	TRINITY_DN19092_c0_g1	TRINITY_DN5647_c0_g1	TRINITY_DN18926_c6_g1	TRINITY_DN92652_c0_g1	OG0000526	1	1	1	1	1	1	1	1	1	1	OG0000526	TRINITY_DN16950_c2_g1	TRINITY_DN13660_c0_g1	TRINITY_DN92652_c0_g1	TRINITY_DN19092_c0_g1	TRINITY_DN5647_c0_g1	TRINITY_DN12956_c2_g3	TRINITY_DN18926_c6_g1
OG0000529	TRINITY_DN1138_c3_g2, TRINITY_DN1967_c1_g2	TRINITY_DN18276_c0_g1, TRINITY_DN20255_c2_g1	TRINITY_DN18296_c0_g1, TRINITY_DN569_c0_g1	TRINITY_DN19507_c4_g1	TRINITY_DN19185_c3_g2, TRINITY_DN19244_c3_g1	TRINITY_DN23960_c2_g1	TRINITY_DN21155_c5_g1, TRINITY_DN22323_c4_g1	TRINITY_DN19979_c2_g2, TRINITY_DN36800_c0_g1	TRINITY_DN25888_c0_g1, TRINITY_DN48789_c3_g1	OG0000529	2	2	2	1	2	1	2	2	2	0	OG0000529	TRINITY_DN1967_c1_g2	TRINITY_DN18276_c0_g1	TRINITY_DN569_c0_g1	TRINITY_DN19507_c4_g1	TRINITY_DN19244_c3_g1	TRINITY_DN23960_c2_g1	TRINITY_DN22323_c4_g1	TRINITY_DN19979_c2_g2	TRINITY_DN48789_c3_g1	OG0000529	1	1	1	1	1	1	1	1	1	1	OG0000529	TRINITY_DN569_c0_g1	TRINITY_DN19244_c3_g1	TRINITY_DN48789_c3_g1	TRINITY_DN23960_c2_g1	TRINITY_DN22323_c4_g1	TRINITY_DN19507_c4_g1	TRINITY_DN19979_c2_g2
OG0000530	TRINITY_DN11391_c5_g1, TRINITY_DN7202_c0_g2	TRINITY_DN20108_c8_g2, TRINITY_DN21036_c11_g1	TRINITY_DN18419_c1_g1, TRINITY_DN19596_c0_g1	TRINITY_DN18981_c5_g1, TRINITY_DN19478_c4_g1	TRINITY_DN17026_c8_g1	TRINITY_DN23934_c8_g9, TRINITY_DN24054_c1_g1	TRINITY_DN22184_c1_g1, TRINITY_DN27801_c0_g1	TRINITY_DN17623_c9_g7, TRINITY_DN17623_c9_g8	TRINITY_DN706_c0_g1	OG0000530	2	2	2	2	1	2	2	2	1	0	OG0000530	TRINITY_DN7202_c0_g2	TRINITY_DN21036_c11_g1	TRINITY_DN19596_c0_g1	TRINITY_DN19478_c4_g1	TRINITY_DN17026_c8_g1	TRINITY_DN23934_c8_g9	TRINITY_DN22184_c1_g1	TRINITY_DN17623_c9_g7	TRINITY_DN706_c0_g1	OG0000530	1	1	1	1	1	1	1	1	1	1	OG0000530	TRINITY_DN19596_c0_g1	TRINITY_DN17026_c8_g1	TRINITY_DN706_c0_g1	TRINITY_DN23934_c8_g9	TRINITY_DN22184_c1_g1	TRINITY_DN19478_c4_g1	TRINITY_DN17623_c9_g7
OG0000531	TRINITY_DN4659_c0_g1		TRINITY_DN1870_c2_g1, TRINITY_DN5491_c2_g1	TRINITY_DN15528_c0_g1, TRINITY_DN15683_c12_g1	TRINITY_DN16853_c7_g9, TRINITY_DN18172_c7_g2	TRINITY_DN22468_c5_g1, TRINITY_DN24722_c3_g1	TRINITY_DN12482_c0_g1, TRINITY_DN18764_c7_g1	TRINITY_DN18697_c12_g1, TRINITY_DN34543_c0_g1	TRINITY_DN42536_c7_g1, TRINITY_DN42536_c7_g3, TRINITY_DN42536_c7_g4	OG0000531	1	0	2	2	2	2	2	2	3	0	OG0000531	TRINITY_DN4659_c0_g1		TRINITY_DN5491_c2_g1	TRINITY_DN15528_c0_g1	TRINITY_DN18172_c7_g2	TRINITY_DN24722_c3_g1	TRINITY_DN18764_c7_g1	TRINITY_DN18697_c12_g1	TRINITY_DN42536_c7_g3	OG0000531	1	0	1	1	1	1	1	1	1	0	OG0000531	TRINITY_DN5491_c2_g1	TRINITY_DN18172_c7_g2	TRINITY_DN42536_c7_g3	TRINITY_DN24722_c3_g1	TRINITY_DN18764_c7_g1	TRINITY_DN15528_c0_g1	TRINITY_DN18697_c12_g1
OG0000534	TRINITY_DN777_c0_g1	TRINITY_DN20725_c6_g1, TRINITY_DN22013_c2_g1	TRINITY_DN2097_c0_g1	TRINITY_DN18946_c5_g2, TRINITY_DN21164_c2_g1	TRINITY_DN17536_c7_g1, TRINITY_DN17866_c4_g2	TRINITY_DN23691_c2_g1	TRINITY_DN24550_c4_g2, TRINITY_DN24675_c2_g1	TRINITY_DN19011_c14_g1, TRINITY_DN20558_c2_g3	TRINITY_DN35331_c0_g1, TRINITY_DN36125_c0_g1, TRINITY_DN48993_c2_g1	OG0000534	1	2	1	2	2	1	2	2	3	0	OG0000534	TRINITY_DN777_c0_g1	TRINITY_DN20725_c6_g1	TRINITY_DN2097_c0_g1	TRINITY_DN21164_c2_g1	TRINITY_DN17536_c7_g1	TRINITY_DN23691_c2_g1	TRINITY_DN24550_c4_g2	TRINITY_DN19011_c14_g1	TRINITY_DN48993_c2_g1	OG0000534	1	1	1	1	1	1	1	1	1	1	OG0000534	TRINITY_DN2097_c0_g1	TRINITY_DN17536_c7_g1	TRINITY_DN48993_c2_g1	TRINITY_DN23691_c2_g1	TRINITY_DN24550_c4_g2	TRINITY_DN21164_c2_g1	TRINITY_DN19011_c14_g1
OG0000535	TRINITY_DN3290_c5_g1	TRINITY_DN18631_c4_g2, TRINITY_DN21105_c8_g15	TRINITY_DN222_c25_g3, TRINITY_DN3322_c0_g3	TRINITY_DN13616_c3_g1	TRINITY_DN16248_c11_g1, TRINITY_DN16547_c5_g1	TRINITY_DN23973_c7_g1, TRINITY_DN23973_c7_g3	TRINITY_DN21827_c1_g1	TRINITY_DN18031_c7_g3, TRINITY_DN18186_c4_g2, TRINITY_DN18186_c4_g4	TRINITY_DN48188_c2_g2, TRINITY_DN48188_c2_g5	OG0000535	1	2	2	1	2	2	1	3	2	0	OG0000535	TRINITY_DN3290_c5_g1	TRINITY_DN18631_c4_g2	TRINITY_DN222_c25_g3	TRINITY_DN13616_c3_g1	TRINITY_DN16248_c11_g1	TRINITY_DN23973_c7_g3	TRINITY_DN21827_c1_g1	TRINITY_DN18186_c4_g2	TRINITY_DN48188_c2_g2	OG0000535	1	1	1	1	1	1	1	1	1	1	OG0000535	TRINITY_DN222_c25_g3	TRINITY_DN16248_c11_g1	TRINITY_DN48188_c2_g2	TRINITY_DN23973_c7_g3	TRINITY_DN21827_c1_g1	TRINITY_DN13616_c3_g1	TRINITY_DN18186_c4_g2
OG0000540	TRINITY_DN2245_c3_g1, TRINITY_DN727_c0_g1	TRINITY_DN21162_c6_g1, TRINITY_DN23224_c3_g1	TRINITY_DN2565_c0_g1, TRINITY_DN5117_c0_g1	TRINITY_DN16080_c0_g1, TRINITY_DN16151_c4_g1	TRINITY_DN17850_c2_g2	TRINITY_DN24180_c2_g2	TRINITY_DN18927_c1_g1, TRINITY_DN23693_c6_g1	TRINITY_DN18283_c4_g2, TRINITY_DN20406_c10_g1	TRINITY_DN45237_c0_g1, TRINITY_DN45237_c0_g2	OG0000540	2	2	2	2	1	1	2	2	2	0	OG0000540	TRINITY_DN2245_c3_g1	TRINITY_DN21162_c6_g1	TRINITY_DN2565_c0_g1	TRINITY_DN16080_c0_g1	TRINITY_DN17850_c2_g2	TRINITY_DN24180_c2_g2	TRINITY_DN23693_c6_g1	TRINITY_DN18283_c4_g2	TRINITY_DN45237_c0_g1	OG0000540	1	1	1	1	1	1	1	1	1	1	OG0000540	TRINITY_DN2565_c0_g1	TRINITY_DN17850_c2_g2	TRINITY_DN45237_c0_g1	TRINITY_DN24180_c2_g2	TRINITY_DN23693_c6_g1	TRINITY_DN16080_c0_g1	TRINITY_DN18283_c4_g2
OG0000541	TRINITY_DN2754_c2_g1, TRINITY_DN36080_c0_g1	TRINITY_DN18847_c3_g4, TRINITY_DN19051_c5_g2	TRINITY_DN2581_c2_g2, TRINITY_DN38810_c1_g1	TRINITY_DN14462_c2_g2, TRINITY_DN16302_c5_g1	TRINITY_DN16650_c5_g5, TRINITY_DN16718_c4_g1	TRINITY_DN24153_c7_g4	TRINITY_DN21405_c1_g1, TRINITY_DN22979_c11_g1	TRINITY_DN18441_c6_g1, TRINITY_DN20541_c6_g2	TRINITY_DN44851_c5_g3	OG0000541	2	2	2	2	2	1	2	2	1	0	OG0000541	TRINITY_DN2754_c2_g1	TRINITY_DN19051_c5_g2	TRINITY_DN38810_c1_g1	TRINITY_DN16302_c5_g1	TRINITY_DN16718_c4_g1	TRINITY_DN24153_c7_g4	TRINITY_DN22979_c11_g1	TRINITY_DN20541_c6_g2	TRINITY_DN44851_c5_g3	OG0000541	1	1	1	1	1	1	1	1	1	1	OG0000541	TRINITY_DN38810_c1_g1	TRINITY_DN16718_c4_g1	TRINITY_DN44851_c5_g3	TRINITY_DN24153_c7_g4	TRINITY_DN22979_c11_g1	TRINITY_DN16302_c5_g1	TRINITY_DN20541_c6_g2
OG0000542	TRINITY_DN766_c1_g2	TRINITY_DN12465_c0_g1, TRINITY_DN21973_c6_g1	TRINITY_DN2618_c2_g1	TRINITY_DN13855_c3_g1, TRINITY_DN20415_c1_g1, TRINITY_DN20415_c1_g5	TRINITY_DN19051_c3_g1	TRINITY_DN23022_c2_g1, TRINITY_DN23022_c2_g2, TRINITY_DN23940_c4_g3	TRINITY_DN19665_c3_g2	TRINITY_DN19244_c6_g1, TRINITY_DN20829_c1_g1	TRINITY_DN46355_c3_g1, TRINITY_DN47454_c0_g2	OG0000542	1	2	1	3	1	3	1	2	2	0	OG0000542	TRINITY_DN766_c1_g2	TRINITY_DN21973_c6_g1	TRINITY_DN2618_c2_g1	TRINITY_DN13855_c3_g1	TRINITY_DN19051_c3_g1	TRINITY_DN23940_c4_g3	TRINITY_DN19665_c3_g2	TRINITY_DN19244_c6_g1	TRINITY_DN47454_c0_g2	OG0000542	1	1	1	1	1	1	1	1	1	1	OG0000542	TRINITY_DN2618_c2_g1	TRINITY_DN19051_c3_g1	TRINITY_DN47454_c0_g2	TRINITY_DN23940_c4_g3	TRINITY_DN19665_c3_g2	TRINITY_DN13855_c3_g1	TRINITY_DN19244_c6_g1
OG0000544	TRINITY_DN2226_c1_g5, TRINITY_DN3649_c0_g3	TRINITY_DN19790_c4_g3	TRINITY_DN2697_c0_g1, TRINITY_DN8415_c0_g1	TRINITY_DN17663_c4_g1	TRINITY_DN15604_c0_g1, TRINITY_DN19690_c6_g1	TRINITY_DN19332_c0_g1, TRINITY_DN21500_c10_g1	TRINITY_DN20903_c4_g4, TRINITY_DN22022_c3_g1	TRINITY_DN16771_c0_g1, TRINITY_DN17264_c0_g1	TRINITY_DN41730_c0_g1, TRINITY_DN44485_c8_g1	OG0000544	2	1	2	1	2	2	2	2	2	0	OG0000544	TRINITY_DN3649_c0_g3	TRINITY_DN19790_c4_g3	TRINITY_DN8415_c0_g1	TRINITY_DN17663_c4_g1	TRINITY_DN15604_c0_g1	TRINITY_DN19332_c0_g1	TRINITY_DN22022_c3_g1	TRINITY_DN17264_c0_g1	TRINITY_DN44485_c8_g1	OG0000544	1	1	1	1	1	1	1	1	1	1	OG0000544	TRINITY_DN8415_c0_g1	TRINITY_DN15604_c0_g1	TRINITY_DN44485_c8_g1	TRINITY_DN19332_c0_g1	TRINITY_DN22022_c3_g1	TRINITY_DN17663_c4_g1	TRINITY_DN17264_c0_g1
OG0000545	TRINITY_DN1603_c0_g2, TRINITY_DN1791_c0_g1	TRINITY_DN19618_c1_g2, TRINITY_DN20607_c8_g3	TRINITY_DN2789_c0_g2, TRINITY_DN2952_c0_g1	TRINITY_DN15200_c6_g1	TRINITY_DN16684_c5_g2	TRINITY_DN21084_c0_g1, TRINITY_DN21214_c0_g1	TRINITY_DN21311_c9_g1, TRINITY_DN21773_c5_g2	TRINITY_DN19875_c4_g1, TRINITY_DN20458_c7_g2	TRINITY_DN45344_c0_g1, TRINITY_DN45536_c0_g1	OG0000545	2	2	2	1	1	2	2	2	2	0	OG0000545	TRINITY_DN1791_c0_g1	TRINITY_DN19618_c1_g2	TRINITY_DN2952_c0_g1	TRINITY_DN15200_c6_g1	TRINITY_DN16684_c5_g2	TRINITY_DN21084_c0_g1	TRINITY_DN21773_c5_g2	TRINITY_DN19875_c4_g1	TRINITY_DN45536_c0_g1	OG0000545	1	1	1	1	1	1	1	1	1	1	OG0000545	TRINITY_DN2952_c0_g1	TRINITY_DN16684_c5_g2	TRINITY_DN45536_c0_g1	TRINITY_DN21084_c0_g1	TRINITY_DN21773_c5_g2	TRINITY_DN15200_c6_g1	TRINITY_DN19875_c4_g1
OG0000547	TRINITY_DN916_c2_g1	TRINITY_DN18967_c6_g3, TRINITY_DN20400_c4_g2	TRINITY_DN29_c6_g3, TRINITY_DN4047_c1_g1	TRINITY_DN13693_c4_g1, TRINITY_DN18557_c1_g1	TRINITY_DN17265_c9_g1	TRINITY_DN22716_c8_g1, TRINITY_DN24930_c5_g1, TRINITY_DN24930_c5_g2	TRINITY_DN19208_c4_g2, TRINITY_DN21321_c6_g3	TRINITY_DN18573_c3_g1, TRINITY_DN20394_c4_g9	TRINITY_DN46358_c3_g1	OG0000547	1	2	2	2	1	3	2	2	1	0	OG0000547	TRINITY_DN916_c2_g1	TRINITY_DN20400_c4_g2	TRINITY_DN29_c6_g3	TRINITY_DN18557_c1_g1	TRINITY_DN17265_c9_g1	TRINITY_DN22716_c8_g1	TRINITY_DN19208_c4_g2	TRINITY_DN20394_c4_g9	TRINITY_DN46358_c3_g1	OG0000547	1	1	1	1	1	1	1	1	1	1	OG0000547	TRINITY_DN29_c6_g3	TRINITY_DN17265_c9_g1	TRINITY_DN46358_c3_g1	TRINITY_DN22716_c8_g1	TRINITY_DN19208_c4_g2	TRINITY_DN18557_c1_g1	TRINITY_DN20394_c4_g9
OG0000548	TRINITY_DN18161_c1_g1	TRINITY_DN19716_c0_g4	TRINITY_DN300_c2_g1	TRINITY_DN16668_c5_g1, TRINITY_DN20010_c9_g1	TRINITY_DN16346_c7_g1, TRINITY_DN27454_c0_g1	TRINITY_DN22455_c7_g1, TRINITY_DN40763_c0_g1, TRINITY_DN7312_c0_g1	TRINITY_DN22094_c4_g1, TRINITY_DN22094_c4_g3	TRINITY_DN18215_c7_g3, TRINITY_DN20653_c7_g1, TRINITY_DN20653_c7_g7	TRINITY_DN47521_c0_g1	OG0000548	1	1	1	2	2	3	2	3	1	0	OG0000548	TRINITY_DN18161_c1_g1	TRINITY_DN19716_c0_g4	TRINITY_DN300_c2_g1	TRINITY_DN16668_c5_g1	TRINITY_DN16346_c7_g1	TRINITY_DN22455_c7_g1	TRINITY_DN22094_c4_g1	TRINITY_DN18215_c7_g3	TRINITY_DN47521_c0_g1	OG0000548	1	1	1	1	1	1	1	1	1	1	OG0000548	TRINITY_DN300_c2_g1	TRINITY_DN16346_c7_g1	TRINITY_DN47521_c0_g1	TRINITY_DN22455_c7_g1	TRINITY_DN22094_c4_g1	TRINITY_DN16668_c5_g1	TRINITY_DN18215_c7_g3
OG0000549	TRINITY_DN124_c3_g1	TRINITY_DN23497_c3_g3, TRINITY_DN23497_c3_g6	TRINITY_DN307_c2_g1	TRINITY_DN17940_c4_g2, TRINITY_DN20488_c2_g1	TRINITY_DN18925_c6_g1	TRINITY_DN22591_c3_g2	TRINITY_DN19768_c6_g1, TRINITY_DN22058_c6_g1	TRINITY_DN17721_c6_g3, TRINITY_DN21378_c6_g1, TRINITY_DN21378_c6_g4	TRINITY_DN42732_c0_g7, TRINITY_DN44667_c1_g1, TRINITY_DN46426_c1_g1	OG0000549	1	2	1	2	1	1	2	3	3	0	OG0000549	TRINITY_DN124_c3_g1	TRINITY_DN23497_c3_g3	TRINITY_DN307_c2_g1	TRINITY_DN20488_c2_g1	TRINITY_DN18925_c6_g1	TRINITY_DN22591_c3_g2	TRINITY_DN19768_c6_g1	TRINITY_DN17721_c6_g3	TRINITY_DN42732_c0_g7	OG0000549	1	1	1	1	1	1	1	1	1	1	OG0000549	TRINITY_DN307_c2_g1	TRINITY_DN18925_c6_g1	TRINITY_DN42732_c0_g7	TRINITY_DN22591_c3_g2	TRINITY_DN19768_c6_g1	TRINITY_DN20488_c2_g1	TRINITY_DN17721_c6_g3
OG0000553	TRINITY_DN1139_c1_g3	TRINITY_DN34809_c0_g1	TRINITY_DN345_c15_g1	TRINITY_DN12789_c6_g2, TRINITY_DN18113_c2_g3	TRINITY_DN17906_c2_g4, TRINITY_DN17906_c2_g5, TRINITY_DN18498_c6_g4	TRINITY_DN23719_c3_g2, TRINITY_DN23719_c3_g7	TRINITY_DN20178_c10_g1, TRINITY_DN21122_c5_g9	TRINITY_DN20340_c1_g1	TRINITY_DN26989_c0_g1, TRINITY_DN47751_c0_g1, TRINITY_DN47751_c0_g2	OG0000553	1	1	1	2	3	2	2	1	3	0	OG0000553	TRINITY_DN1139_c1_g3	TRINITY_DN34809_c0_g1	TRINITY_DN345_c15_g1	TRINITY_DN18113_c2_g3	TRINITY_DN18498_c6_g4	TRINITY_DN23719_c3_g7	TRINITY_DN21122_c5_g9	TRINITY_DN20340_c1_g1	TRINITY_DN47751_c0_g1	OG0000553	1	1	1	1	1	1	1	1	1	1	OG0000553	TRINITY_DN345_c15_g1	TRINITY_DN18498_c6_g4	TRINITY_DN47751_c0_g1	TRINITY_DN23719_c3_g7	TRINITY_DN21122_c5_g9	TRINITY_DN18113_c2_g3	TRINITY_DN20340_c1_g1
OG0000556	TRINITY_DN1333_c6_g1, TRINITY_DN4651_c0_g1	TRINITY_DN19583_c3_g2, TRINITY_DN22973_c1_g1	TRINITY_DN3746_c0_g1, TRINITY_DN4200_c0_g1	TRINITY_DN15296_c3_g1, TRINITY_DN21014_c2_g1	TRINITY_DN15392_c0_g1, TRINITY_DN15971_c0_g1	TRINITY_DN21835_c0_g1	TRINITY_DN20814_c0_g1	TRINITY_DN16958_c1_g1, TRINITY_DN17479_c0_g1	TRINITY_DN37605_c0_g1, TRINITY_DN43958_c5_g1	OG0000556	2	2	2	2	2	1	1	2	2	0	OG0000556	TRINITY_DN1333_c6_g1	TRINITY_DN19583_c3_g2	TRINITY_DN3746_c0_g1	TRINITY_DN21014_c2_g1	TRINITY_DN15971_c0_g1	TRINITY_DN21835_c0_g1	TRINITY_DN20814_c0_g1	TRINITY_DN17479_c0_g1	TRINITY_DN43958_c5_g1	OG0000556	1	1	1	1	1	1	1	1	1	1	OG0000556	TRINITY_DN3746_c0_g1	TRINITY_DN15971_c0_g1	TRINITY_DN43958_c5_g1	TRINITY_DN21835_c0_g1	TRINITY_DN20814_c0_g1	TRINITY_DN21014_c2_g1	TRINITY_DN17479_c0_g1
OG0000559	TRINITY_DN16345_c1_g1, TRINITY_DN882_c0_g1	TRINITY_DN23890_c9_g2, TRINITY_DN4331_c0_g1	TRINITY_DN408_c9_g1	TRINITY_DN18266_c3_g3, TRINITY_DN23648_c0_g1, TRINITY_DN25028_c0_g1	TRINITY_DN16179_c10_g1	TRINITY_DN21832_c15_g2, TRINITY_DN22407_c3_g12	TRINITY_DN18653_c2_g3	TRINITY_DN18157_c6_g1	TRINITY_DN17823_c0_g1, TRINITY_DN41525_c8_g1, TRINITY_DN44026_c4_g2	OG0000559	2	2	1	3	1	2	1	1	3	0	OG0000559	TRINITY_DN882_c0_g1	TRINITY_DN23890_c9_g2	TRINITY_DN408_c9_g1	TRINITY_DN18266_c3_g3	TRINITY_DN16179_c10_g1	TRINITY_DN22407_c3_g12	TRINITY_DN18653_c2_g3	TRINITY_DN18157_c6_g1	TRINITY_DN44026_c4_g2	OG0000559	1	1	1	1	1	1	1	1	1	1	OG0000559	TRINITY_DN408_c9_g1	TRINITY_DN16179_c10_g1	TRINITY_DN44026_c4_g2	TRINITY_DN22407_c3_g12	TRINITY_DN18653_c2_g3	TRINITY_DN18266_c3_g3	TRINITY_DN18157_c6_g1
OG0000560	TRINITY_DN720_c0_g2	TRINITY_DN23010_c3_g1, TRINITY_DN23010_c3_g2	TRINITY_DN429_c2_g1	TRINITY_DN19245_c5_g1, TRINITY_DN20797_c4_g1, TRINITY_DN20797_c4_g2	TRINITY_DN19490_c5_g4, TRINITY_DN19490_c5_g5	TRINITY_DN23427_c6_g1	TRINITY_DN20072_c7_g1, TRINITY_DN24851_c5_g1	TRINITY_DN19744_c6_g1	TRINITY_DN46267_c4_g1, TRINITY_DN48211_c3_g3, TRINITY_DN48749_c3_g3	OG0000560	1	2	1	3	2	1	2	1	3	0	OG0000560	TRINITY_DN720_c0_g2	TRINITY_DN23010_c3_g1	TRINITY_DN429_c2_g1	TRINITY_DN20797_c4_g2	TRINITY_DN19490_c5_g4	TRINITY_DN23427_c6_g1	TRINITY_DN24851_c5_g1	TRINITY_DN19744_c6_g1	TRINITY_DN48211_c3_g3	OG0000560	1	1	1	1	1	1	1	1	1	1	OG0000560	TRINITY_DN429_c2_g1	TRINITY_DN19490_c5_g4	TRINITY_DN48211_c3_g3	TRINITY_DN23427_c6_g1	TRINITY_DN24851_c5_g1	TRINITY_DN20797_c4_g2	TRINITY_DN19744_c6_g1
OG0000561	TRINITY_DN4170_c1_g1	TRINITY_DN19740_c5_g2, TRINITY_DN22099_c2_g1, TRINITY_DN34012_c0_g1	TRINITY_DN443_c1_g2	TRINITY_DN18915_c6_g1	TRINITY_DN19519_c1_g1	TRINITY_DN24745_c7_g1, TRINITY_DN24745_c7_g6	TRINITY_DN23039_c7_g1, TRINITY_DN24278_c2_g2	TRINITY_DN20127_c11_g1, TRINITY_DN20990_c11_g3	TRINITY_DN42189_c4_g3, TRINITY_DN44854_c3_g4, TRINITY_DN48551_c6_g2	OG0000561	1	3	1	1	1	2	2	2	3	0	OG0000561	TRINITY_DN4170_c1_g1	TRINITY_DN22099_c2_g1	TRINITY_DN443_c1_g2	TRINITY_DN18915_c6_g1	TRINITY_DN19519_c1_g1	TRINITY_DN24745_c7_g1	TRINITY_DN24278_c2_g2	TRINITY_DN20990_c11_g3	TRINITY_DN48551_c6_g2	OG0000561	1	1	1	1	1	1	1	1	1	1	OG0000561	TRINITY_DN443_c1_g2	TRINITY_DN19519_c1_g1	TRINITY_DN48551_c6_g2	TRINITY_DN24745_c7_g1	TRINITY_DN24278_c2_g2	TRINITY_DN18915_c6_g1	TRINITY_DN20990_c11_g3
OG0000562	TRINITY_DN1649_c0_g2, TRINITY_DN8481_c0_g1	TRINITY_DN19621_c2_g1, TRINITY_DN19621_c2_g4, TRINITY_DN23179_c10_g1	TRINITY_DN4870_c1_g2	TRINITY_DN19694_c3_g1	TRINITY_DN15476_c0_g1, TRINITY_DN16049_c0_g1	TRINITY_DN21016_c0_g1	TRINITY_DN17321_c0_g1, TRINITY_DN22381_c2_g4	TRINITY_DN13890_c0_g1, TRINITY_DN13890_c0_g2, TRINITY_DN17120_c0_g2	TRINITY_DN41308_c0_g1	OG0000562	2	3	1	1	2	1	2	3	1	0	OG0000562	TRINITY_DN1649_c0_g2	TRINITY_DN19621_c2_g1	TRINITY_DN4870_c1_g2	TRINITY_DN19694_c3_g1	TRINITY_DN16049_c0_g1	TRINITY_DN21016_c0_g1	TRINITY_DN22381_c2_g4	TRINITY_DN17120_c0_g2	TRINITY_DN41308_c0_g1	OG0000562	1	1	1	1	1	1	1	1	1	1	OG0000562	TRINITY_DN4870_c1_g2	TRINITY_DN16049_c0_g1	TRINITY_DN41308_c0_g1	TRINITY_DN21016_c0_g1	TRINITY_DN22381_c2_g4	TRINITY_DN19694_c3_g1	TRINITY_DN17120_c0_g2
OG0000563	TRINITY_DN1663_c2_g1, TRINITY_DN42820_c0_g1, TRINITY_DN827_c0_g2	TRINITY_DN20512_c3_g4, TRINITY_DN20839_c1_g1, TRINITY_DN50353_c0_g1	TRINITY_DN50_c1_g1	TRINITY_DN18545_c4_g1	TRINITY_DN17871_c10_g1, TRINITY_DN17945_c9_g6	TRINITY_DN23775_c6_g1	TRINITY_DN20545_c9_g6, TRINITY_DN23442_c6_g2, TRINITY_DN23442_c6_g4	TRINITY_DN19400_c6_g1	TRINITY_DN47763_c3_g1	OG0000563	3	3	1	1	2	1	3	1	1	0	OG0000563	TRINITY_DN827_c0_g2	TRINITY_DN20512_c3_g4	TRINITY_DN50_c1_g1	TRINITY_DN18545_c4_g1	TRINITY_DN17871_c10_g1	TRINITY_DN23775_c6_g1	TRINITY_DN20545_c9_g6	TRINITY_DN19400_c6_g1	TRINITY_DN47763_c3_g1	OG0000563	1	1	1	1	1	1	1	1	1	1	OG0000563	TRINITY_DN50_c1_g1	TRINITY_DN17871_c10_g1	TRINITY_DN47763_c3_g1	TRINITY_DN23775_c6_g1	TRINITY_DN20545_c9_g6	TRINITY_DN18545_c4_g1	TRINITY_DN19400_c6_g1
OG0000564	TRINITY_DN1508_c0_g2, TRINITY_DN20230_c0_g2	TRINITY_DN20914_c5_g1, TRINITY_DN21896_c1_g1, TRINITY_DN21896_c1_g2	TRINITY_DN5586_c0_g1	TRINITY_DN14289_c3_g7, TRINITY_DN14529_c3_g1	TRINITY_DN38312_c0_g1, TRINITY_DN439_c0_g1	TRINITY_DN23837_c3_g2	TRINITY_DN25107_c1_g1, TRINITY_DN32139_c0_g1	TRINITY_DN19639_c0_g1	TRINITY_DN44082_c5_g1, TRINITY_DN70858_c0_g1	OG0000564	2	3	1	2	2	1	2	1	2	0	OG0000564	TRINITY_DN1508_c0_g2	TRINITY_DN21896_c1_g2	TRINITY_DN5586_c0_g1	TRINITY_DN14289_c3_g7	TRINITY_DN38312_c0_g1	TRINITY_DN23837_c3_g2	TRINITY_DN25107_c1_g1	TRINITY_DN19639_c0_g1	TRINITY_DN44082_c5_g1	OG0000564	1	1	1	1	1	1	1	1	1	1	OG0000564	TRINITY_DN5586_c0_g1	TRINITY_DN38312_c0_g1	TRINITY_DN44082_c5_g1	TRINITY_DN23837_c3_g2	TRINITY_DN25107_c1_g1	TRINITY_DN14289_c3_g7	TRINITY_DN19639_c0_g1
OG0000565	TRINITY_DN367_c0_g3	TRINITY_DN22888_c5_g1	TRINITY_DN576_c0_g1	TRINITY_DN15465_c2_g1, TRINITY_DN21364_c9_g2	TRINITY_DN18902_c3_g2, TRINITY_DN18902_c3_g6	TRINITY_DN22777_c2_g1, TRINITY_DN22777_c2_g7, TRINITY_DN24446_c6_g1	TRINITY_DN25049_c4_g1	TRINITY_DN18645_c8_g1, TRINITY_DN20553_c3_g7	TRINITY_DN34523_c0_g1, TRINITY_DN44605_c3_g1, TRINITY_DN48709_c3_g1	OG0000565	1	1	1	2	2	3	1	2	3	0	OG0000565	TRINITY_DN367_c0_g3	TRINITY_DN22888_c5_g1	TRINITY_DN576_c0_g1	TRINITY_DN15465_c2_g1	TRINITY_DN18902_c3_g2	TRINITY_DN24446_c6_g1	TRINITY_DN25049_c4_g1	TRINITY_DN18645_c8_g1	TRINITY_DN48709_c3_g1	OG0000565	1	1	1	1	1	1	1	1	1	1	OG0000565	TRINITY_DN576_c0_g1	TRINITY_DN18902_c3_g2	TRINITY_DN48709_c3_g1	TRINITY_DN24446_c6_g1	TRINITY_DN25049_c4_g1	TRINITY_DN15465_c2_g1	TRINITY_DN18645_c8_g1
OG0000568	TRINITY_DN3912_c2_g1, TRINITY_DN816_c1_g4	TRINITY_DN32330_c0_g1, TRINITY_DN63390_c0_g1	TRINITY_DN5958_c0_g1, TRINITY_DN685_c1_g1	TRINITY_DN12458_c6_g1	TRINITY_DN18857_c6_g2	TRINITY_DN20682_c0_g1, TRINITY_DN22129_c4_g1	TRINITY_DN18839_c1_g1, TRINITY_DN20702_c6_g3	TRINITY_DN18531_c7_g2, TRINITY_DN19526_c2_g1	TRINITY_DN44830_c4_g2, TRINITY_DN45856_c1_g1	OG0000568	2	2	2	1	1	2	2	2	2	0	OG0000568	TRINITY_DN3912_c2_g1	TRINITY_DN63390_c0_g1	TRINITY_DN685_c1_g1	TRINITY_DN12458_c6_g1	TRINITY_DN18857_c6_g2	TRINITY_DN22129_c4_g1	TRINITY_DN20702_c6_g3	TRINITY_DN19526_c2_g1	TRINITY_DN44830_c4_g2	OG0000568	1	1	1	1	1	1	1	1	1	1	OG0000568	TRINITY_DN685_c1_g1	TRINITY_DN18857_c6_g2	TRINITY_DN44830_c4_g2	TRINITY_DN22129_c4_g1	TRINITY_DN20702_c6_g3	TRINITY_DN12458_c6_g1	TRINITY_DN19526_c2_g1
OG0000569	TRINITY_DN103_c2_g3, TRINITY_DN1813_c0_g2	TRINITY_DN18074_c3_g6, TRINITY_DN20231_c3_g2	TRINITY_DN619_c8_g1	TRINITY_DN18520_c5_g2, TRINITY_DN19064_c4_g1	TRINITY_DN16428_c4_g4, TRINITY_DN16801_c6_g4	TRINITY_DN22987_c5_g1, TRINITY_DN23262_c4_g2	TRINITY_DN22860_c9_g3	TRINITY_DN17795_c2_g1, TRINITY_DN18639_c4_g1, TRINITY_DN19645_c4_g6	TRINITY_DN46291_c12_g1	OG0000569	2	2	1	2	2	2	1	3	1	0	OG0000569	TRINITY_DN103_c2_g3	TRINITY_DN20231_c3_g2	TRINITY_DN619_c8_g1	TRINITY_DN18520_c5_g2	TRINITY_DN16801_c6_g4	TRINITY_DN23262_c4_g2	TRINITY_DN22860_c9_g3	TRINITY_DN18639_c4_g1	TRINITY_DN46291_c12_g1	OG0000569	1	1	1	1	1	1	1	1	1	1	OG0000569	TRINITY_DN619_c8_g1	TRINITY_DN16801_c6_g4	TRINITY_DN46291_c12_g1	TRINITY_DN23262_c4_g2	TRINITY_DN22860_c9_g3	TRINITY_DN18520_c5_g2	TRINITY_DN18639_c4_g1
OG0000573	TRINITY_DN3175_c0_g1, TRINITY_DN5528_c0_g1	TRINITY_DN23603_c0_g3, TRINITY_DN23603_c1_g2	TRINITY_DN923_c2_g1, TRINITY_DN923_c4_g1	TRINITY_DN13968_c5_g8, TRINITY_DN16159_c5_g1	TRINITY_DN18980_c7_g2, TRINITY_DN18980_c7_g3	TRINITY_DN19019_c0_g1, TRINITY_DN23476_c4_g3	TRINITY_DN21534_c6_g4	TRINITY_DN19750_c9_g1	TRINITY_DN42731_c1_g4, TRINITY_DN43980_c1_g1	OG0000573	2	2	2	2	2	2	1	1	2	0	OG0000573	TRINITY_DN3175_c0_g1	TRINITY_DN23603_c0_g3	TRINITY_DN923_c2_g1	TRINITY_DN16159_c5_g1	TRINITY_DN18980_c7_g3	TRINITY_DN19019_c0_g1	TRINITY_DN21534_c6_g4	TRINITY_DN19750_c9_g1	TRINITY_DN43980_c1_g1	OG0000573	1	1	1	1	1	1	1	1	1	1	OG0000573	TRINITY_DN923_c2_g1	TRINITY_DN18980_c7_g3	TRINITY_DN43980_c1_g1	TRINITY_DN19019_c0_g1	TRINITY_DN21534_c6_g4	TRINITY_DN16159_c5_g1	TRINITY_DN19750_c9_g1
OG0000575	TRINITY_DN3731_c0_g2	TRINITY_DN22901_c2_g2, TRINITY_DN22901_c2_g4		TRINITY_DN11828_c0_g1, TRINITY_DN25979_c0_g1, TRINITY_DN29944_c0_g1	TRINITY_DN15371_c0_g1, TRINITY_DN7471_c0_g1	TRINITY_DN32353_c0_g1	TRINITY_DN17858_c0_g1, TRINITY_DN17858_c0_g2	TRINITY_DN16078_c0_g1, TRINITY_DN28920_c0_g1, TRINITY_DN35807_c0_g1	TRINITY_DN32748_c0_g1, TRINITY_DN89521_c0_g1	OG0000575	1	2	0	3	2	1	2	3	2	0	OG0000575	TRINITY_DN3731_c0_g2	TRINITY_DN22901_c2_g4		TRINITY_DN29944_c0_g1	TRINITY_DN15371_c0_g1	TRINITY_DN32353_c0_g1	TRINITY_DN17858_c0_g1	TRINITY_DN16078_c0_g1	TRINITY_DN32748_c0_g1	OG0000575	1	1	0	1	1	1	1	1	1	0	OG0000575	TRINITY_UK00000_c0_g1	TRINITY_DN15371_c0_g1	TRINITY_DN32748_c0_g1	TRINITY_DN32353_c0_g1	TRINITY_DN17858_c0_g1	TRINITY_DN29944_c0_g1	TRINITY_DN16078_c0_g1
OG0000582	TRINITY_DN13801_c8_g1	TRINITY_DN20238_c4_g4		TRINITY_DN22006_c0_g1, TRINITY_DN24589_c0_g1, TRINITY_DN32661_c0_g1	TRINITY_DN24574_c0_g1, TRINITY_DN3631_c0_g1	TRINITY_DN50960_c0_g1, TRINITY_DN53223_c0_g1	TRINITY_DN31082_c0_g1, TRINITY_DN47472_c0_g1	TRINITY_DN22805_c0_g1, TRINITY_DN44045_c0_g1	TRINITY_DN11720_c0_g1, TRINITY_DN36598_c0_g1, TRINITY_DN36598_c0_g2	OG0000582	1	1	0	3	2	2	2	2	3	0	OG0000582	TRINITY_DN13801_c8_g1	TRINITY_DN20238_c4_g4		TRINITY_DN32661_c0_g1	TRINITY_DN24574_c0_g1	TRINITY_DN53223_c0_g1	TRINITY_DN47472_c0_g1	TRINITY_DN22805_c0_g1	TRINITY_DN36598_c0_g2	OG0000582	1	1	0	1	1	1	1	1	1	0	OG0000582	TRINITY_UK00000_c0_g1	TRINITY_DN24574_c0_g1	TRINITY_DN36598_c0_g2	TRINITY_DN53223_c0_g1	TRINITY_DN47472_c0_g1	TRINITY_DN32661_c0_g1	TRINITY_DN22805_c0_g1
OG0000586	TRINITY_DN178_c1_g1	TRINITY_DN19862_c2_g1, TRINITY_DN19862_c2_g3, TRINITY_DN19862_c2_g8	TRINITY_DN10961_c0_g3, TRINITY_DN392_c5_g1	TRINITY_DN17269_c6_g1, TRINITY_DN19247_c6_g1	TRINITY_DN17542_c2_g1	TRINITY_DN24599_c8_g2	TRINITY_DN23762_c4_g1	TRINITY_DN18254_c7_g2, TRINITY_DN21047_c2_g1	TRINITY_DN45250_c0_g1, TRINITY_DN46574_c1_g1	OG0000586	1	3	2	2	1	1	1	2	2	0	OG0000586	TRINITY_DN178_c1_g1	TRINITY_DN19862_c2_g8	TRINITY_DN392_c5_g1	TRINITY_DN19247_c6_g1	TRINITY_DN17542_c2_g1	TRINITY_DN24599_c8_g2	TRINITY_DN23762_c4_g1	TRINITY_DN21047_c2_g1	TRINITY_DN46574_c1_g1	OG0000586	1	1	1	1	1	1	1	1	1	1	OG0000586	TRINITY_DN392_c5_g1	TRINITY_DN17542_c2_g1	TRINITY_DN46574_c1_g1	TRINITY_DN24599_c8_g2	TRINITY_DN23762_c4_g1	TRINITY_DN19247_c6_g1	TRINITY_DN21047_c2_g1
OG0000587	TRINITY_DN30021_c2_g1, TRINITY_DN30021_c5_g1	TRINITY_DN18624_c6_g2	TRINITY_DN11015_c0_g2, TRINITY_DN11015_c6_g1	TRINITY_DN16953_c0_g1, TRINITY_DN19706_c4_g3, TRINITY_DN19706_c4_g5	TRINITY_DN6503_c0_g1	TRINITY_DN23804_c2_g3, TRINITY_DN24113_c0_g1, TRINITY_DN52459_c0_g1	TRINITY_DN23816_c2_g2	TRINITY_DN36235_c0_g1	TRINITY_DN42426_c0_g1	OG0000587	2	1	2	3	1	3	1	1	1	0	OG0000587	TRINITY_DN30021_c2_g1	TRINITY_DN18624_c6_g2	TRINITY_DN11015_c6_g1	TRINITY_DN16953_c0_g1	TRINITY_DN6503_c0_g1	TRINITY_DN52459_c0_g1	TRINITY_DN23816_c2_g2	TRINITY_DN36235_c0_g1	TRINITY_DN42426_c0_g1	OG0000587	1	1	1	1	1	1	1	1	1	1	OG0000587	TRINITY_DN11015_c6_g1	TRINITY_DN6503_c0_g1	TRINITY_DN42426_c0_g1	TRINITY_DN52459_c0_g1	TRINITY_DN23816_c2_g2	TRINITY_DN16953_c0_g1	TRINITY_DN36235_c0_g1
OG0000589	TRINITY_DN67_c0_g2, TRINITY_DN688_c0_g1	TRINITY_DN23260_c1_g1	TRINITY_DN1142_c0_g2, TRINITY_DN1994_c0_g2	TRINITY_DN12919_c0_g1, TRINITY_DN17693_c3_g1	TRINITY_DN17625_c6_g1	TRINITY_DN22928_c11_g1	TRINITY_DN19048_c7_g1, TRINITY_DN21872_c1_g3	TRINITY_DN17577_c0_g1, TRINITY_DN18517_c15_g1	TRINITY_DN44741_c0_g1, TRINITY_DN46305_c2_g1	OG0000589	2	1	2	2	1	1	2	2	2	0	OG0000589	TRINITY_DN688_c0_g1	TRINITY_DN23260_c1_g1	TRINITY_DN1994_c0_g2	TRINITY_DN17693_c3_g1	TRINITY_DN17625_c6_g1	TRINITY_DN22928_c11_g1	TRINITY_DN19048_c7_g1	TRINITY_DN18517_c15_g1	TRINITY_DN46305_c2_g1	OG0000589	1	1	1	1	1	1	1	1	1	1	OG0000589	TRINITY_DN1994_c0_g2	TRINITY_DN17625_c6_g1	TRINITY_DN46305_c2_g1	TRINITY_DN22928_c11_g1	TRINITY_DN19048_c7_g1	TRINITY_DN17693_c3_g1	TRINITY_DN18517_c15_g1
OG0000591	TRINITY_DN1238_c1_g2	TRINITY_DN19535_c6_g1, TRINITY_DN23694_c4_g3	TRINITY_DN120_c3_g1	TRINITY_DN21413_c11_g3, TRINITY_DN21413_c11_g4	TRINITY_DN19346_c4_g1	TRINITY_DN24529_c0_g1	TRINITY_DN19183_c5_g1, TRINITY_DN23676_c3_g1	TRINITY_DN18326_c5_g3, TRINITY_DN20988_c2_g1	TRINITY_DN39347_c0_g1, TRINITY_DN48948_c5_g2, TRINITY_DN48948_c5_g3	OG0000591	1	2	1	2	1	1	2	2	3	0	OG0000591	TRINITY_DN1238_c1_g2	TRINITY_DN19535_c6_g1	TRINITY_DN120_c3_g1	TRINITY_DN21413_c11_g3	TRINITY_DN19346_c4_g1	TRINITY_DN24529_c0_g1	TRINITY_DN19183_c5_g1	TRINITY_DN20988_c2_g1	TRINITY_DN48948_c5_g3	OG0000591	1	1	1	1	1	1	1	1	1	1	OG0000591	TRINITY_DN120_c3_g1	TRINITY_DN19346_c4_g1	TRINITY_DN48948_c5_g3	TRINITY_DN24529_c0_g1	TRINITY_DN19183_c5_g1	TRINITY_DN21413_c11_g3	TRINITY_DN20988_c2_g1
OG0000592	TRINITY_DN3264_c1_g2	TRINITY_DN18798_c10_g2, TRINITY_DN27706_c0_g1	TRINITY_DN1213_c1_g1	TRINITY_DN19433_c8_g2, TRINITY_DN20503_c11_g1	TRINITY_DN19243_c5_g1	TRINITY_DN24101_c6_g1	TRINITY_DN22880_c1_g2, TRINITY_DN22880_c1_g5	TRINITY_DN20130_c10_g1, TRINITY_DN20130_c10_g4	TRINITY_DN43937_c2_g2, TRINITY_DN48628_c4_g1, TRINITY_DN48628_c4_g2	OG0000592	1	2	1	2	1	1	2	2	3	0	OG0000592	TRINITY_DN3264_c1_g2	TRINITY_DN18798_c10_g2	TRINITY_DN1213_c1_g1	TRINITY_DN20503_c11_g1	TRINITY_DN19243_c5_g1	TRINITY_DN24101_c6_g1	TRINITY_DN22880_c1_g5	TRINITY_DN20130_c10_g1	TRINITY_DN43937_c2_g2	OG0000592	1	1	1	1	1	1	1	1	1	1	OG0000592	TRINITY_DN1213_c1_g1	TRINITY_DN19243_c5_g1	TRINITY_DN43937_c2_g2	TRINITY_DN24101_c6_g1	TRINITY_DN22880_c1_g5	TRINITY_DN20503_c11_g1	TRINITY_DN20130_c10_g1
OG0000593	TRINITY_DN3571_c0_g1, TRINITY_DN873_c6_g1	TRINITY_DN20249_c11_g1, TRINITY_DN22088_c9_g1	TRINITY_DN124_c1_g3	TRINITY_DN20948_c10_g1	TRINITY_DN17142_c4_g5, TRINITY_DN18588_c4_g1	TRINITY_DN22606_c8_g1, TRINITY_DN24166_c10_g1	TRINITY_DN24247_c3_g1, TRINITY_DN25289_c7_g2	TRINITY_DN20745_c4_g3	TRINITY_DN48214_c3_g1, TRINITY_DN48298_c6_g1	OG0000593	2	2	1	1	2	2	2	1	2	0	OG0000593	TRINITY_DN873_c6_g1	TRINITY_DN22088_c9_g1	TRINITY_DN124_c1_g3	TRINITY_DN20948_c10_g1	TRINITY_DN18588_c4_g1	TRINITY_DN24166_c10_g1	TRINITY_DN25289_c7_g2	TRINITY_DN20745_c4_g3	TRINITY_DN48298_c6_g1	OG0000593	1	1	1	1	1	1	1	1	1	1	OG0000593	TRINITY_DN124_c1_g3	TRINITY_DN18588_c4_g1	TRINITY_DN48298_c6_g1	TRINITY_DN24166_c10_g1	TRINITY_DN25289_c7_g2	TRINITY_DN20948_c10_g1	TRINITY_DN20745_c4_g3
OG0000594	TRINITY_DN2468_c0_g1	TRINITY_DN19638_c4_g1, TRINITY_DN22486_c4_g2	TRINITY_DN125_c11_g1, TRINITY_DN909_c1_g1	TRINITY_DN16980_c5_g3, TRINITY_DN18210_c7_g1, TRINITY_DN18651_c6_g1	TRINITY_DN17495_c3_g1, TRINITY_DN17780_c1_g1	TRINITY_DN22343_c4_g1	TRINITY_DN24254_c4_g2	TRINITY_DN21272_c3_g1	TRINITY_DN46174_c1_g1, TRINITY_DN46174_c1_g2	OG0000594	1	2	2	3	2	1	1	1	2	0	OG0000594	TRINITY_DN2468_c0_g1	TRINITY_DN19638_c4_g1	TRINITY_DN909_c1_g1	TRINITY_DN18651_c6_g1	TRINITY_DN17495_c3_g1	TRINITY_DN22343_c4_g1	TRINITY_DN24254_c4_g2	TRINITY_DN21272_c3_g1	TRINITY_DN46174_c1_g2	OG0000594	1	1	1	1	1	1	1	1	1	1	OG0000594	TRINITY_DN909_c1_g1	TRINITY_DN17495_c3_g1	TRINITY_DN46174_c1_g2	TRINITY_DN22343_c4_g1	TRINITY_DN24254_c4_g2	TRINITY_DN18651_c6_g1	TRINITY_DN21272_c3_g1
OG0000595	TRINITY_DN4080_c2_g2	TRINITY_DN22524_c6_g1, TRINITY_DN22524_c6_g3	TRINITY_DN1296_c1_g2, TRINITY_DN1296_c1_g3	TRINITY_DN13642_c4_g1, TRINITY_DN18276_c7_g1	TRINITY_DN17919_c4_g2, TRINITY_DN17985_c9_g1	TRINITY_DN21880_c7_g1	TRINITY_DN20399_c4_g1, TRINITY_DN22311_c8_g1	TRINITY_DN18774_c8_g6	TRINITY_DN48090_c5_g1, TRINITY_DN48433_c1_g5	OG0000595	1	2	2	2	2	1	2	1	2	0	OG0000595	TRINITY_DN4080_c2_g2	TRINITY_DN22524_c6_g3	TRINITY_DN1296_c1_g3	TRINITY_DN18276_c7_g1	TRINITY_DN17919_c4_g2	TRINITY_DN21880_c7_g1	TRINITY_DN20399_c4_g1	TRINITY_DN18774_c8_g6	TRINITY_DN48433_c1_g5	OG0000595	1	1	1	1	1	1	1	1	1	1	OG0000595	TRINITY_DN1296_c1_g3	TRINITY_DN17919_c4_g2	TRINITY_DN48433_c1_g5	TRINITY_DN21880_c7_g1	TRINITY_DN20399_c4_g1	TRINITY_DN18276_c7_g1	TRINITY_DN18774_c8_g6
OG0000596	TRINITY_DN3002_c0_g1	TRINITY_DN20401_c5_g2, TRINITY_DN21529_c5_g1	TRINITY_DN130_c0_g2	TRINITY_DN14717_c2_g1, TRINITY_DN14717_c2_g2	TRINITY_DN18291_c4_g1, TRINITY_DN18291_c4_g8	TRINITY_DN24380_c8_g1, TRINITY_DN24812_c6_g1	TRINITY_DN23982_c4_g1	TRINITY_DN19658_c5_g1, TRINITY_DN21200_c6_g1	TRINITY_DN41577_c6_g1, TRINITY_DN48743_c8_g1	OG0000596	1	2	1	2	2	2	1	2	2	0	OG0000596	TRINITY_DN3002_c0_g1	TRINITY_DN21529_c5_g1	TRINITY_DN130_c0_g2	TRINITY_DN14717_c2_g1	TRINITY_DN18291_c4_g8	TRINITY_DN24380_c8_g1	TRINITY_DN23982_c4_g1	TRINITY_DN19658_c5_g1	TRINITY_DN48743_c8_g1	OG0000596	1	1	1	1	1	1	1	1	1	1	OG0000596	TRINITY_DN130_c0_g2	TRINITY_DN18291_c4_g8	TRINITY_DN48743_c8_g1	TRINITY_DN24380_c8_g1	TRINITY_DN23982_c4_g1	TRINITY_DN14717_c2_g1	TRINITY_DN19658_c5_g1
OG0000597	TRINITY_DN461_c0_g2	TRINITY_DN19898_c2_g1, TRINITY_DN22006_c7_g1, TRINITY_DN23578_c3_g1	TRINITY_DN13475_c0_g1	TRINITY_DN14528_c7_g1, TRINITY_DN20361_c4_g1	TRINITY_DN18494_c2_g4	TRINITY_DN22642_c6_g4, TRINITY_DN24726_c5_g1	TRINITY_DN18436_c3_g2, TRINITY_DN25278_c2_g1	TRINITY_DN20429_c0_g1	TRINITY_DN44880_c9_g1, TRINITY_DN47025_c5_g1	OG0000597	1	3	1	2	1	2	2	1	2	0	OG0000597	TRINITY_DN461_c0_g2	TRINITY_DN19898_c2_g1	TRINITY_DN13475_c0_g1	TRINITY_DN20361_c4_g1	TRINITY_DN18494_c2_g4	TRINITY_DN22642_c6_g4	TRINITY_DN25278_c2_g1	TRINITY_DN20429_c0_g1	TRINITY_DN44880_c9_g1	OG0000597	1	1	1	1	1	1	1	1	1	1	OG0000597	TRINITY_DN13475_c0_g1	TRINITY_DN18494_c2_g4	TRINITY_DN44880_c9_g1	TRINITY_DN22642_c6_g4	TRINITY_DN25278_c2_g1	TRINITY_DN20361_c4_g1	TRINITY_DN20429_c0_g1
OG0000598		TRINITY_DN18562_c9_g1, TRINITY_DN38923_c0_g1	TRINITY_DN14088_c0_g1	TRINITY_DN35842_c0_g1, TRINITY_DN5221_c0_g1	TRINITY_DN29622_c0_g1	TRINITY_DN10603_c0_g1, TRINITY_DN8017_c0_g1	TRINITY_DN20673_c0_g1	TRINITY_DN3038_c0_g1, TRINITY_DN3038_c0_g2, TRINITY_DN47907_c0_g1	TRINITY_DN14815_c0_g1, TRINITY_DN15717_c0_g2, TRINITY_DN76823_c0_g1	OG0000598	0	2	1	2	1	2	1	3	3	0	OG0000598		TRINITY_DN18562_c9_g1	TRINITY_DN14088_c0_g1	TRINITY_DN5221_c0_g1	TRINITY_DN29622_c0_g1	TRINITY_DN8017_c0_g1	TRINITY_DN20673_c0_g1	TRINITY_DN47907_c0_g1	TRINITY_DN14815_c0_g1	OG0000598	0	1	1	1	1	1	1	1	1	0	OG0000598	TRINITY_DN14088_c0_g1	TRINITY_DN29622_c0_g1	TRINITY_DN14815_c0_g1	TRINITY_DN8017_c0_g1	TRINITY_DN20673_c0_g1	TRINITY_DN5221_c0_g1	TRINITY_DN47907_c0_g1
OG0000599	TRINITY_DN20517_c0_g1, TRINITY_DN3715_c0_g1	TRINITY_DN22365_c0_g1, TRINITY_DN23092_c0_g1, TRINITY_DN23092_c0_g2	TRINITY_DN144_c14_g2	TRINITY_DN17429_c0_g1	TRINITY_DN18580_c1_g5, TRINITY_DN19729_c1_g5	TRINITY_DN21691_c7_g1, TRINITY_DN23699_c2_g1	TRINITY_DN18101_c8_g1	TRINITY_DN21293_c1_g1	TRINITY_DN42384_c0_g1, TRINITY_DN45597_c0_g1	OG0000599	2	3	1	1	2	2	1	1	2	0	OG0000599	TRINITY_DN3715_c0_g1	TRINITY_DN22365_c0_g1	TRINITY_DN144_c14_g2	TRINITY_DN17429_c0_g1	TRINITY_DN18580_c1_g5	TRINITY_DN21691_c7_g1	TRINITY_DN18101_c8_g1	TRINITY_DN21293_c1_g1	TRINITY_DN42384_c0_g1	OG0000599	1	1	1	1	1	1	1	1	1	1	OG0000599	TRINITY_DN144_c14_g2	TRINITY_DN18580_c1_g5	TRINITY_DN42384_c0_g1	TRINITY_DN21691_c7_g1	TRINITY_DN18101_c8_g1	TRINITY_DN17429_c0_g1	TRINITY_DN21293_c1_g1
OG0000604	TRINITY_DN61257_c1_g1	TRINITY_DN18954_c4_g3	TRINITY_DN16293_c2_g1	TRINITY_DN16574_c7_g1, TRINITY_DN21203_c6_g2	TRINITY_DN17403_c2_g1, TRINITY_DN4623_c0_g1	TRINITY_DN22725_c3_g1, TRINITY_DN24135_c4_g2	TRINITY_DN16672_c0_g1, TRINITY_DN22464_c1_g3	TRINITY_DN11712_c0_g1, TRINITY_DN11712_c0_g2	TRINITY_DN25754_c0_g2, TRINITY_DN42190_c0_g1	OG0000604	1	1	1	2	2	2	2	2	2	0	OG0000604	TRINITY_DN61257_c1_g1	TRINITY_DN18954_c4_g3	TRINITY_DN16293_c2_g1	TRINITY_DN21203_c6_g2	TRINITY_DN17403_c2_g1	TRINITY_DN24135_c4_g2	TRINITY_DN16672_c0_g1	TRINITY_DN11712_c0_g1	TRINITY_DN42190_c0_g1	OG0000604	1	1	1	1	1	1	1	1	1	1	OG0000604	TRINITY_DN16293_c2_g1	TRINITY_DN17403_c2_g1	TRINITY_DN42190_c0_g1	TRINITY_DN24135_c4_g2	TRINITY_DN16672_c0_g1	TRINITY_DN21203_c6_g2	TRINITY_DN11712_c0_g1
OG0000605	TRINITY_DN3100_c1_g1	TRINITY_DN19699_c2_g2	TRINITY_DN1699_c0_g1	TRINITY_DN13535_c9_g1, TRINITY_DN19355_c4_g1, TRINITY_DN20902_c11_g1	TRINITY_DN17589_c10_g2, TRINITY_DN17589_c10_g3, TRINITY_DN19615_c4_g2	TRINITY_DN23588_c0_g2	TRINITY_DN24017_c4_g3	TRINITY_DN19936_c2_g1, TRINITY_DN19936_c2_g2	TRINITY_DN42949_c2_g1, TRINITY_DN47058_c9_g1	OG0000605	1	1	1	3	3	1	1	2	2	0	OG0000605	TRINITY_DN3100_c1_g1	TRINITY_DN19699_c2_g2	TRINITY_DN1699_c0_g1	TRINITY_DN20902_c11_g1	TRINITY_DN17589_c10_g3	TRINITY_DN23588_c0_g2	TRINITY_DN24017_c4_g3	TRINITY_DN19936_c2_g1	TRINITY_DN42949_c2_g1	OG0000605	1	1	1	1	1	1	1	1	1	1	OG0000605	TRINITY_DN1699_c0_g1	TRINITY_DN17589_c10_g3	TRINITY_DN42949_c2_g1	TRINITY_DN23588_c0_g2	TRINITY_DN24017_c4_g3	TRINITY_DN20902_c11_g1	TRINITY_DN19936_c2_g1
OG0000606	TRINITY_DN917_c0_g5	TRINITY_DN18357_c3_g2, TRINITY_DN21895_c2_g1	TRINITY_DN1703_c0_g2	TRINITY_DN18923_c4_g1	TRINITY_DN18156_c5_g3, TRINITY_DN19812_c0_g1	TRINITY_DN22272_c10_g3	TRINITY_DN23689_c1_g1, TRINITY_DN24750_c6_g3	TRINITY_DN20852_c0_g1, TRINITY_DN20921_c4_g3	TRINITY_DN37374_c0_g1, TRINITY_DN48667_c1_g7, TRINITY_DN49007_c0_g1	OG0000606	1	2	1	1	2	1	2	2	3	0	OG0000606	TRINITY_DN917_c0_g5	TRINITY_DN18357_c3_g2	TRINITY_DN1703_c0_g2	TRINITY_DN18923_c4_g1	TRINITY_DN19812_c0_g1	TRINITY_DN22272_c10_g3	TRINITY_DN24750_c6_g3	TRINITY_DN20921_c4_g3	TRINITY_DN48667_c1_g7	OG0000606	1	1	1	1	1	1	1	1	1	1	OG0000606	TRINITY_DN1703_c0_g2	TRINITY_DN19812_c0_g1	TRINITY_DN48667_c1_g7	TRINITY_DN22272_c10_g3	TRINITY_DN24750_c6_g3	TRINITY_DN18923_c4_g1	TRINITY_DN20921_c4_g3
OG0000607	TRINITY_DN3279_c0_g6	TRINITY_DN19322_c8_g2, TRINITY_DN19322_c8_g3, TRINITY_DN19465_c7_g5	TRINITY_DN1747_c2_g2, TRINITY_DN39863_c1_g1	TRINITY_DN14572_c4_g1	TRINITY_DN18873_c1_g1	TRINITY_DN22097_c5_g12, TRINITY_DN22097_c5_g8	TRINITY_DN23168_c8_g2, TRINITY_DN23168_c8_g5	TRINITY_DN17846_c7_g1	TRINITY_DN46466_c6_g2, TRINITY_DN46466_c6_g4	OG0000607	1	3	2	1	1	2	2	1	2	0	OG0000607	TRINITY_DN3279_c0_g6	TRINITY_DN19465_c7_g5	TRINITY_DN1747_c2_g2	TRINITY_DN14572_c4_g1	TRINITY_DN18873_c1_g1	TRINITY_DN22097_c5_g8	TRINITY_DN23168_c8_g2	TRINITY_DN17846_c7_g1	TRINITY_DN46466_c6_g2	OG0000607	1	1	1	1	1	1	1	1	1	1	OG0000607	TRINITY_DN1747_c2_g2	TRINITY_DN18873_c1_g1	TRINITY_DN46466_c6_g2	TRINITY_DN22097_c5_g8	TRINITY_DN23168_c8_g2	TRINITY_DN14572_c4_g1	TRINITY_DN17846_c7_g1
OG0000608	TRINITY_DN3698_c0_g2	TRINITY_DN41232_c0_g1	TRINITY_DN1792_c0_g1, TRINITY_DN4129_c0_g2	TRINITY_DN13980_c7_g1, TRINITY_DN17652_c0_g1	TRINITY_DN16167_c0_g1, TRINITY_DN18328_c0_g2, TRINITY_DN28698_c0_g1	TRINITY_DN21403_c10_g1	TRINITY_DN24492_c6_g1	TRINITY_DN18112_c6_g2, TRINITY_DN20527_c2_g2	TRINITY_DN40058_c0_g1, TRINITY_DN42736_c0_g1	OG0000608	1	1	2	2	3	1	1	2	2	0	OG0000608	TRINITY_DN3698_c0_g2	TRINITY_DN41232_c0_g1	TRINITY_DN1792_c0_g1	TRINITY_DN13980_c7_g1	TRINITY_DN16167_c0_g1	TRINITY_DN21403_c10_g1	TRINITY_DN24492_c6_g1	TRINITY_DN18112_c6_g2	TRINITY_DN42736_c0_g1	OG0000608	1	1	1	1	1	1	1	1	1	1	OG0000608	TRINITY_DN1792_c0_g1	TRINITY_DN16167_c0_g1	TRINITY_DN42736_c0_g1	TRINITY_DN21403_c10_g1	TRINITY_DN24492_c6_g1	TRINITY_DN13980_c7_g1	TRINITY_DN18112_c6_g2
OG0000609	TRINITY_DN29030_c1_g1, TRINITY_DN29030_c5_g1	TRINITY_DN19399_c2_g2, TRINITY_DN19399_c2_g4	TRINITY_DN18766_c2_g1, TRINITY_DN18766_c4_g1, TRINITY_DN18766_c5_g1	TRINITY_DN18803_c2_g2	TRINITY_DN16624_c9_g1	TRINITY_DN7388_c0_g1	TRINITY_DN19346_c6_g1	TRINITY_DN19040_c6_g1	TRINITY_DN14605_c0_g1, TRINITY_DN22917_c0_g1, TRINITY_DN25700_c0_g1	OG0000609	2	2	3	1	1	1	1	1	3	0	OG0000609	TRINITY_DN29030_c5_g1	TRINITY_DN19399_c2_g2	TRINITY_DN18766_c5_g1	TRINITY_DN18803_c2_g2	TRINITY_DN16624_c9_g1	TRINITY_DN7388_c0_g1	TRINITY_DN19346_c6_g1	TRINITY_DN19040_c6_g1	TRINITY_DN22917_c0_g1	OG0000609	1	1	1	1	1	1	1	1	1	1	OG0000609	TRINITY_DN18766_c5_g1	TRINITY_DN16624_c9_g1	TRINITY_DN22917_c0_g1	TRINITY_DN7388_c0_g1	TRINITY_DN19346_c6_g1	TRINITY_DN18803_c2_g2	TRINITY_DN19040_c6_g1
OG0000611	TRINITY_DN2206_c3_g1, TRINITY_DN3231_c0_g1	TRINITY_DN19628_c3_g2, TRINITY_DN22174_c4_g1, TRINITY_DN23783_c6_g2	TRINITY_DN195_c0_g1	TRINITY_DN18530_c6_g1, TRINITY_DN21378_c7_g1	TRINITY_DN17564_c2_g1	TRINITY_DN24027_c11_g1	TRINITY_DN18942_c10_g1, TRINITY_DN21018_c2_g4, TRINITY_DN25215_c4_g1	TRINITY_DN19711_c6_g1	TRINITY_DN47096_c2_g1	OG0000611	2	3	1	2	1	1	3	1	1	0	OG0000611	TRINITY_DN3231_c0_g1	TRINITY_DN23783_c6_g2	TRINITY_DN195_c0_g1	TRINITY_DN18530_c6_g1	TRINITY_DN17564_c2_g1	TRINITY_DN24027_c11_g1	TRINITY_DN25215_c4_g1	TRINITY_DN19711_c6_g1	TRINITY_DN47096_c2_g1	OG0000611	1	1	1	1	1	1	1	1	1	1	OG0000611	TRINITY_DN195_c0_g1	TRINITY_DN17564_c2_g1	TRINITY_DN47096_c2_g1	TRINITY_DN24027_c11_g1	TRINITY_DN25215_c4_g1	TRINITY_DN18530_c6_g1	TRINITY_DN19711_c6_g1
OG0000612	TRINITY_DN148_c0_g3, TRINITY_DN4125_c1_g1	TRINITY_DN19567_c4_g3, TRINITY_DN19567_c4_g6	TRINITY_DN1972_c0_g2, TRINITY_DN7872_c1_g1	TRINITY_DN12427_c5_g1	TRINITY_DN16268_c6_g2	TRINITY_DN21532_c10_g6, TRINITY_DN24609_c6_g1	TRINITY_DN24200_c4_g1	TRINITY_DN17381_c0_g1	TRINITY_DN41479_c7_g1, TRINITY_DN43513_c0_g1, TRINITY_DN45033_c1_g2	OG0000612	2	2	2	1	1	2	1	1	3	0	OG0000612	TRINITY_DN148_c0_g3	TRINITY_DN19567_c4_g3	TRINITY_DN7872_c1_g1	TRINITY_DN12427_c5_g1	TRINITY_DN16268_c6_g2	TRINITY_DN21532_c10_g6	TRINITY_DN24200_c4_g1	TRINITY_DN17381_c0_g1	TRINITY_DN45033_c1_g2	OG0000612	1	1	1	1	1	1	1	1	1	1	OG0000612	TRINITY_DN7872_c1_g1	TRINITY_DN16268_c6_g2	TRINITY_DN45033_c1_g2	TRINITY_DN21532_c10_g6	TRINITY_DN24200_c4_g1	TRINITY_DN12427_c5_g1	TRINITY_DN17381_c0_g1
OG0000614	TRINITY_DN2817_c0_g2	TRINITY_DN23267_c4_g1, TRINITY_DN31625_c0_g1	TRINITY_DN213_c7_g1, TRINITY_DN7680_c0_g1	TRINITY_DN16103_c0_g1, TRINITY_DN21139_c8_g1	TRINITY_DN19116_c7_g1	TRINITY_DN22898_c6_g2, TRINITY_DN23375_c9_g1	TRINITY_DN20025_c7_g1, TRINITY_DN21760_c8_g4	TRINITY_DN18434_c0_g1	TRINITY_DN46952_c1_g1, TRINITY_DN48932_c1_g1	OG0000614	1	2	2	2	1	2	2	1	2	0	OG0000614	TRINITY_DN2817_c0_g2	TRINITY_DN23267_c4_g1	TRINITY_DN7680_c0_g1	TRINITY_DN16103_c0_g1	TRINITY_DN19116_c7_g1	TRINITY_DN23375_c9_g1	TRINITY_DN20025_c7_g1	TRINITY_DN18434_c0_g1	TRINITY_DN46952_c1_g1	OG0000614	1	1	1	1	1	1	1	1	1	1	OG0000614	TRINITY_DN7680_c0_g1	TRINITY_DN19116_c7_g1	TRINITY_DN46952_c1_g1	TRINITY_DN23375_c9_g1	TRINITY_DN20025_c7_g1	TRINITY_DN16103_c0_g1	TRINITY_DN18434_c0_g1
OG0000616	TRINITY_DN1929_c0_g1	TRINITY_DN19447_c3_g2	TRINITY_DN2176_c0_g2, TRINITY_DN2176_c0_g4	TRINITY_DN11920_c0_g2, TRINITY_DN19184_c5_g2	TRINITY_DN12498_c0_g1, TRINITY_DN14484_c0_g1	TRINITY_DN19375_c0_g1, TRINITY_DN19375_c0_g2	TRINITY_DN16703_c0_g1	TRINITY_DN16526_c0_g1, TRINITY_DN16526_c0_g2	TRINITY_DN40565_c0_g1, TRINITY_DN40565_c0_g2	OG0000616	1	1	2	2	2	2	1	2	2	0	OG0000616	TRINITY_DN1929_c0_g1	TRINITY_DN19447_c3_g2	TRINITY_DN2176_c0_g4	TRINITY_DN11920_c0_g2	TRINITY_DN14484_c0_g1	TRINITY_DN19375_c0_g1	TRINITY_DN16703_c0_g1	TRINITY_DN16526_c0_g2	TRINITY_DN40565_c0_g1	OG0000616	1	1	1	1	1	1	1	1	1	1	OG0000616	TRINITY_DN2176_c0_g4	TRINITY_DN14484_c0_g1	TRINITY_DN40565_c0_g1	TRINITY_DN19375_c0_g1	TRINITY_DN16703_c0_g1	TRINITY_DN11920_c0_g2	TRINITY_DN16526_c0_g2
OG0000618	TRINITY_DN1046_c0_g3	TRINITY_DN19370_c2_g2, TRINITY_DN23863_c8_g1, TRINITY_DN23863_c8_g3	TRINITY_DN218_c0_g1	TRINITY_DN12673_c4_g1, TRINITY_DN19923_c4_g1	TRINITY_DN19595_c2_g1	TRINITY_DN23295_c3_g1, TRINITY_DN24605_c9_g1	TRINITY_DN24388_c3_g1	TRINITY_DN18170_c4_g2, TRINITY_DN19467_c6_g1	TRINITY_DN45980_c7_g2, TRINITY_DN47945_c2_g1	OG0000618	1	3	1	2	1	2	1	2	2	0	OG0000618	TRINITY_DN1046_c0_g3	TRINITY_DN19370_c2_g2	TRINITY_DN218_c0_g1	TRINITY_DN19923_c4_g1	TRINITY_DN19595_c2_g1	TRINITY_DN23295_c3_g1	TRINITY_DN24388_c3_g1	TRINITY_DN18170_c4_g2	TRINITY_DN45980_c7_g2	OG0000618	1	1	1	1	1	1	1	1	1	1	OG0000618	TRINITY_DN218_c0_g1	TRINITY_DN19595_c2_g1	TRINITY_DN45980_c7_g2	TRINITY_DN23295_c3_g1	TRINITY_DN24388_c3_g1	TRINITY_DN19923_c4_g1	TRINITY_DN18170_c4_g2
OG0000619	TRINITY_DN8798_c1_g1	TRINITY_DN18756_c6_g2	TRINITY_DN21933_c0_g1, TRINITY_DN21933_c3_g1	TRINITY_DN18402_c9_g1	TRINITY_DN17080_c6_g14, TRINITY_DN9009_c0_g1, TRINITY_DN9009_c0_g2	TRINITY_DN25063_c0_g1, TRINITY_DN38517_c0_g1	TRINITY_DN11473_c0_g1, TRINITY_DN9462_c0_g1	TRINITY_DN18967_c2_g1, TRINITY_DN18967_c2_g2	TRINITY_DN63112_c0_g1	OG0000619	1	1	2	1	3	2	2	2	1	0	OG0000619	TRINITY_DN8798_c1_g1	TRINITY_DN18756_c6_g2	TRINITY_DN21933_c3_g1	TRINITY_DN18402_c9_g1	TRINITY_DN9009_c0_g1	TRINITY_DN25063_c0_g1	TRINITY_DN9462_c0_g1	TRINITY_DN18967_c2_g1	TRINITY_DN63112_c0_g1	OG0000619	1	1	1	1	1	1	1	1	1	1	OG0000619	TRINITY_DN21933_c3_g1	TRINITY_DN9009_c0_g1	TRINITY_DN63112_c0_g1	TRINITY_DN25063_c0_g1	TRINITY_DN9462_c0_g1	TRINITY_DN18402_c9_g1	TRINITY_DN18967_c2_g1
OG0000620	TRINITY_DN2131_c3_g1	TRINITY_DN22849_c7_g2	TRINITY_DN22870_c1_g1, TRINITY_DN3990_c1_g1	TRINITY_DN5763_c0_g1	TRINITY_DN16937_c0_g2, TRINITY_DN17206_c9_g4	TRINITY_DN17716_c0_g1, TRINITY_DN8741_c0_g1	TRINITY_DN18629_c6_g2	TRINITY_DN10261_c0_g1, TRINITY_DN15954_c0_g1	TRINITY_DN18257_c0_g1, TRINITY_DN42619_c1_g1, TRINITY_DN47914_c3_g2	OG0000620	1	1	2	1	2	2	1	2	3	0	OG0000620	TRINITY_DN2131_c3_g1	TRINITY_DN22849_c7_g2	TRINITY_DN22870_c1_g1	TRINITY_DN5763_c0_g1	TRINITY_DN16937_c0_g2	TRINITY_DN17716_c0_g1	TRINITY_DN18629_c6_g2	TRINITY_DN15954_c0_g1	TRINITY_DN42619_c1_g1	OG0000620	1	1	1	1	1	1	1	1	1	1	OG0000620	TRINITY_DN22870_c1_g1	TRINITY_DN16937_c0_g2	TRINITY_DN42619_c1_g1	TRINITY_DN17716_c0_g1	TRINITY_DN18629_c6_g2	TRINITY_DN5763_c0_g1	TRINITY_DN15954_c0_g1
OG0000621	TRINITY_DN62807_c0_g1, TRINITY_DN63502_c0_g1	TRINITY_DN23351_c1_g1, TRINITY_DN5435_c0_g1	TRINITY_DN23893_c1_g1, TRINITY_DN23893_c5_g1	TRINITY_DN13212_c1_g2	TRINITY_DN18656_c5_g1	TRINITY_DN23235_c7_g3, TRINITY_DN50463_c0_g1	TRINITY_DN34147_c0_g1	TRINITY_DN20464_c2_g2	TRINITY_DN34865_c0_g1, TRINITY_DN34865_c0_g2, TRINITY_DN34865_c0_g3	OG0000621	2	2	2	1	1	2	1	1	3	0	OG0000621	TRINITY_DN62807_c0_g1	TRINITY_DN23351_c1_g1	TRINITY_DN23893_c5_g1	TRINITY_DN13212_c1_g2	TRINITY_DN18656_c5_g1	TRINITY_DN23235_c7_g3	TRINITY_DN34147_c0_g1	TRINITY_DN20464_c2_g2	TRINITY_DN34865_c0_g1	OG0000621	1	1	1	1	1	1	1	1	1	1	OG0000621	TRINITY_DN23893_c5_g1	TRINITY_DN18656_c5_g1	TRINITY_DN34865_c0_g1	TRINITY_DN23235_c7_g3	TRINITY_DN34147_c0_g1	TRINITY_DN13212_c1_g2	TRINITY_DN20464_c2_g2
OG0000622	TRINITY_DN905_c0_g3	TRINITY_DN22789_c5_g1, TRINITY_DN22789_c5_g2, TRINITY_DN36347_c0_g1	TRINITY_DN2429_c0_g1	TRINITY_DN19967_c7_g1	TRINITY_DN19236_c1_g1, TRINITY_DN19746_c11_g2	TRINITY_DN24410_c6_g1	TRINITY_DN20112_c9_g1, TRINITY_DN24199_c8_g1	TRINITY_DN20149_c0_g1	TRINITY_DN37230_c0_g1, TRINITY_DN38282_c0_g1, TRINITY_DN48880_c2_g1	OG0000622	1	3	1	1	2	1	2	1	3	0	OG0000622	TRINITY_DN905_c0_g3	TRINITY_DN22789_c5_g1	TRINITY_DN2429_c0_g1	TRINITY_DN19967_c7_g1	TRINITY_DN19746_c11_g2	TRINITY_DN24410_c6_g1	TRINITY_DN20112_c9_g1	TRINITY_DN20149_c0_g1	TRINITY_DN38282_c0_g1	OG0000622	1	1	1	1	1	1	1	1	1	1	OG0000622	TRINITY_DN2429_c0_g1	TRINITY_DN19746_c11_g2	TRINITY_DN38282_c0_g1	TRINITY_DN24410_c6_g1	TRINITY_DN20112_c9_g1	TRINITY_DN19967_c7_g1	TRINITY_DN20149_c0_g1
OG0000625	TRINITY_DN787_c1_g1	TRINITY_DN20227_c6_g1	TRINITY_DN259_c0_g1	TRINITY_DN16006_c2_g1, TRINITY_DN21154_c8_g2, TRINITY_DN21154_c8_g5	TRINITY_DN18926_c4_g2	TRINITY_DN24008_c2_g1	TRINITY_DN23723_c5_g1, TRINITY_DN23723_c5_g2	TRINITY_DN20444_c6_g1, TRINITY_DN20959_c8_g2	TRINITY_DN44584_c4_g2, TRINITY_DN45912_c7_g1, TRINITY_DN46285_c1_g1	OG0000625	1	1	1	3	1	1	2	2	3	0	OG0000625	TRINITY_DN787_c1_g1	TRINITY_DN20227_c6_g1	TRINITY_DN259_c0_g1	TRINITY_DN21154_c8_g2	TRINITY_DN18926_c4_g2	TRINITY_DN24008_c2_g1	TRINITY_DN23723_c5_g2	TRINITY_DN20959_c8_g2	TRINITY_DN44584_c4_g2	OG0000625	1	1	1	1	1	1	1	1	1	1	OG0000625	TRINITY_DN259_c0_g1	TRINITY_DN18926_c4_g2	TRINITY_DN44584_c4_g2	TRINITY_DN24008_c2_g1	TRINITY_DN23723_c5_g2	TRINITY_DN21154_c8_g2	TRINITY_DN20959_c8_g2
OG0000626	TRINITY_DN54268_c0_g1, TRINITY_DN54268_c2_g1	TRINITY_DN20121_c6_g1, TRINITY_DN38656_c0_g1	TRINITY_DN26142_c2_g1	TRINITY_DN12984_c3_g1, TRINITY_DN12984_c3_g2, TRINITY_DN748_c0_g1	TRINITY_DN1817_c0_g1, TRINITY_DN2965_c0_g1	TRINITY_DN20623_c0_g3	TRINITY_DN22631_c12_g1, TRINITY_DN27746_c0_g1		TRINITY_DN43919_c1_g1, TRINITY_DN43919_c1_g2	OG0000626	2	2	1	3	2	1	2	0	2	0	OG0000626	TRINITY_DN54268_c2_g1	TRINITY_DN20121_c6_g1	TRINITY_DN26142_c2_g1	TRINITY_DN12984_c3_g1	TRINITY_DN2965_c0_g1	TRINITY_DN20623_c0_g3	TRINITY_DN27746_c0_g1		TRINITY_DN43919_c1_g1	OG0000626	1	1	1	1	1	1	1	0	1	0	OG0000626	TRINITY_DN26142_c2_g1	TRINITY_DN2965_c0_g1	TRINITY_DN43919_c1_g1	TRINITY_DN20623_c0_g3	TRINITY_DN27746_c0_g1	TRINITY_DN12984_c3_g1	TRINITY_UK00000_c0_g1
OG0000629	TRINITY_DN17979_c1_g2	TRINITY_DN21432_c5_g1	TRINITY_DN27087_c3_g1, TRINITY_DN37134_c1_g2	TRINITY_DN14093_c5_g2, TRINITY_DN21069_c7_g1	TRINITY_DN16262_c0_g1, TRINITY_DN34518_c0_g1	TRINITY_DN20980_c0_g1, TRINITY_DN24376_c3_g3	TRINITY_DN19884_c9_g1	TRINITY_DN17731_c4_g3, TRINITY_DN19996_c1_g1	TRINITY_DN44434_c4_g6, TRINITY_DN45091_c0_g2	OG0000629	1	1	2	2	2	2	1	2	2	0	OG0000629	TRINITY_DN17979_c1_g2	TRINITY_DN21432_c5_g1	TRINITY_DN37134_c1_g2	TRINITY_DN14093_c5_g2	TRINITY_DN16262_c0_g1	TRINITY_DN24376_c3_g3	TRINITY_DN19884_c9_g1	TRINITY_DN19996_c1_g1	TRINITY_DN44434_c4_g6	OG0000629	1	1	1	1	1	1	1	1	1	1	OG0000629	TRINITY_DN37134_c1_g2	TRINITY_DN16262_c0_g1	TRINITY_DN44434_c4_g6	TRINITY_DN24376_c3_g3	TRINITY_DN19884_c9_g1	TRINITY_DN14093_c5_g2	TRINITY_DN19996_c1_g1
OG0000630	TRINITY_DN10616_c0_g2	TRINITY_DN20495_c1_g2	TRINITY_DN27501_c1_g1	TRINITY_DN16808_c5_g1	TRINITY_DN11047_c0_g1	TRINITY_DN16169_c0_g1, TRINITY_DN4401_c0_g1	TRINITY_DN29834_c0_g1, TRINITY_DN7652_c0_g1, TRINITY_DN7652_c0_g2	TRINITY_DN4911_c0_g1, TRINITY_DN4911_c0_g2	TRINITY_DN12158_c0_g1, TRINITY_DN6698_c0_g1, TRINITY_DN82954_c0_g1	OG0000630	1	1	1	1	1	2	3	2	3	0	OG0000630	TRINITY_DN10616_c0_g2	TRINITY_DN20495_c1_g2	TRINITY_DN27501_c1_g1	TRINITY_DN16808_c5_g1	TRINITY_DN11047_c0_g1	TRINITY_DN4401_c0_g1	TRINITY_DN7652_c0_g2	TRINITY_DN4911_c0_g2	TRINITY_DN6698_c0_g1	OG0000630	1	1	1	1	1	1	1	1	1	1	OG0000630	TRINITY_DN27501_c1_g1	TRINITY_DN11047_c0_g1	TRINITY_DN6698_c0_g1	TRINITY_DN4401_c0_g1	TRINITY_DN7652_c0_g2	TRINITY_DN16808_c5_g1	TRINITY_DN4911_c0_g2
OG0000631	TRINITY_DN9351_c0_g1	TRINITY_DN20753_c12_g2	TRINITY_DN29102_c1_g1, TRINITY_DN50107_c1_g1	TRINITY_DN19846_c7_g11	TRINITY_DN11888_c0_g1	TRINITY_DN12534_c0_g1, TRINITY_DN12534_c0_g2, TRINITY_DN31971_c0_g1	TRINITY_DN14403_c0_g1, TRINITY_DN14403_c0_g2	TRINITY_DN12517_c0_g1, TRINITY_DN12517_c0_g2	TRINITY_DN23068_c0_g1, TRINITY_DN36029_c1_g1	OG0000631	1	1	2	1	1	3	2	2	2	0	OG0000631	TRINITY_DN9351_c0_g1	TRINITY_DN20753_c12_g2	TRINITY_DN50107_c1_g1	TRINITY_DN19846_c7_g11	TRINITY_DN11888_c0_g1	TRINITY_DN31971_c0_g1	TRINITY_DN14403_c0_g2	TRINITY_DN12517_c0_g2	TRINITY_DN23068_c0_g1	OG0000631	1	1	1	1	1	1	1	1	1	1	OG0000631	TRINITY_DN50107_c1_g1	TRINITY_DN11888_c0_g1	TRINITY_DN23068_c0_g1	TRINITY_DN31971_c0_g1	TRINITY_DN14403_c0_g2	TRINITY_DN19846_c7_g11	TRINITY_DN12517_c0_g2
OG0000634	TRINITY_DN4471_c0_g1	TRINITY_DN1321_c0_g1, TRINITY_DN41237_c0_g1	TRINITY_DN3084_c0_g1, TRINITY_DN3084_c1_g3	TRINITY_DN12590_c2_g2, TRINITY_DN12590_c2_g7	TRINITY_DN16471_c0_g1, TRINITY_DN16471_c0_g2	TRINITY_DN21089_c0_g1, TRINITY_DN21089_c0_g3	TRINITY_DN18407_c7_g1	TRINITY_DN18348_c3_g3	TRINITY_DN45870_c2_g1, TRINITY_DN45870_c2_g2	OG0000634	1	2	2	2	2	2	1	1	2	0	OG0000634	TRINITY_DN4471_c0_g1	TRINITY_DN41237_c0_g1	TRINITY_DN3084_c0_g1	TRINITY_DN12590_c2_g2	TRINITY_DN16471_c0_g2	TRINITY_DN21089_c0_g3	TRINITY_DN18407_c7_g1	TRINITY_DN18348_c3_g3	TRINITY_DN45870_c2_g1	OG0000634	1	1	1	1	1	1	1	1	1	1	OG0000634	TRINITY_DN3084_c0_g1	TRINITY_DN16471_c0_g2	TRINITY_DN45870_c2_g1	TRINITY_DN21089_c0_g3	TRINITY_DN18407_c7_g1	TRINITY_DN12590_c2_g2	TRINITY_DN18348_c3_g3
OG0000637	TRINITY_DN748_c5_g1	TRINITY_DN21625_c4_g1, TRINITY_DN46766_c0_g1	TRINITY_DN3317_c0_g1	TRINITY_DN17546_c4_g2, TRINITY_DN19916_c6_g2	TRINITY_DN18115_c3_g1, TRINITY_DN19787_c8_g2	TRINITY_DN24552_c5_g1, TRINITY_DN24552_c5_g2	TRINITY_DN18318_c6_g2, TRINITY_DN18879_c5_g1	TRINITY_DN21339_c2_g1	TRINITY_DN43745_c3_g2, TRINITY_DN44988_c7_g1	OG0000637	1	2	1	2	2	2	2	1	2	0	OG0000637	TRINITY_DN748_c5_g1	TRINITY_DN21625_c4_g1	TRINITY_DN3317_c0_g1	TRINITY_DN19916_c6_g2	TRINITY_DN19787_c8_g2	TRINITY_DN24552_c5_g2	TRINITY_DN18318_c6_g2	TRINITY_DN21339_c2_g1	TRINITY_DN44988_c7_g1	OG0000637	1	1	1	1	1	1	1	1	1	1	OG0000637	TRINITY_DN3317_c0_g1	TRINITY_DN19787_c8_g2	TRINITY_DN44988_c7_g1	TRINITY_DN24552_c5_g2	TRINITY_DN18318_c6_g2	TRINITY_DN19916_c6_g2	TRINITY_DN21339_c2_g1
OG0000638	TRINITY_DN294_c1_g2	TRINITY_DN23147_c6_g1, TRINITY_DN23147_c6_g2	TRINITY_DN3321_c0_g2	TRINITY_DN13723_c6_g1, TRINITY_DN14038_c5_g1, TRINITY_DN14038_c5_g2	TRINITY_DN18096_c3_g1, TRINITY_DN18191_c10_g4	TRINITY_DN22194_c10_g1, TRINITY_DN23967_c2_g1	TRINITY_DN20139_c0_g1	TRINITY_DN17503_c0_g1	TRINITY_DN44460_c0_g2, TRINITY_DN46501_c1_g2	OG0000638	1	2	1	3	2	2	1	1	2	0	OG0000638	TRINITY_DN294_c1_g2	TRINITY_DN23147_c6_g1	TRINITY_DN3321_c0_g2	TRINITY_DN13723_c6_g1	TRINITY_DN18096_c3_g1	TRINITY_DN22194_c10_g1	TRINITY_DN20139_c0_g1	TRINITY_DN17503_c0_g1	TRINITY_DN46501_c1_g2	OG0000638	1	1	1	1	1	1	1	1	1	1	OG0000638	TRINITY_DN3321_c0_g2	TRINITY_DN18096_c3_g1	TRINITY_DN46501_c1_g2	TRINITY_DN22194_c10_g1	TRINITY_DN20139_c0_g1	TRINITY_DN13723_c6_g1	TRINITY_DN17503_c0_g1
OG0000639	TRINITY_DN59593_c1_g1	TRINITY_DN20918_c1_g1, TRINITY_DN20918_c1_g2	TRINITY_DN3339_c1_g1	TRINITY_DN13815_c3_g1, TRINITY_DN15323_c9_g1		TRINITY_DN18677_c0_g1, TRINITY_DN18677_c0_g2	TRINITY_DN23862_c5_g7, TRINITY_DN7906_c0_g1	TRINITY_DN19257_c5_g2, TRINITY_DN27668_c0_g1, TRINITY_DN32943_c0_g1	TRINITY_DN27315_c0_g1, TRINITY_DN78505_c0_g1	OG0000639	1	2	1	2	0	2	2	3	2	0	OG0000639	TRINITY_DN59593_c1_g1	TRINITY_DN20918_c1_g2	TRINITY_DN3339_c1_g1	TRINITY_DN13815_c3_g1		TRINITY_DN18677_c0_g2	TRINITY_DN23862_c5_g7	TRINITY_DN19257_c5_g2	TRINITY_DN78505_c0_g1	OG0000639	1	1	1	1	0	1	1	1	1	0	OG0000639	TRINITY_DN3339_c1_g1	TRINITY_UK00000_c0_g1	TRINITY_DN78505_c0_g1	TRINITY_DN18677_c0_g2	TRINITY_DN23862_c5_g7	TRINITY_DN13815_c3_g1	TRINITY_DN19257_c5_g2
OG0000640	TRINITY_DN6658_c1_g1	TRINITY_DN22471_c4_g1	TRINITY_DN33502_c1_g1	TRINITY_DN22642_c0_g1, TRINITY_DN3234_c0_g1, TRINITY_DN7914_c0_g1	TRINITY_DN17778_c3_g1	TRINITY_DN19179_c0_g1	TRINITY_DN30749_c0_g1, TRINITY_DN33800_c0_g1, TRINITY_DN50192_c0_g1	TRINITY_DN17186_c0_g1	TRINITY_DN1004_c0_g1, TRINITY_DN14781_c0_g1, TRINITY_DN60174_c0_g1	OG0000640	1	1	1	3	1	1	3	1	3	0	OG0000640	TRINITY_DN6658_c1_g1	TRINITY_DN22471_c4_g1	TRINITY_DN33502_c1_g1	TRINITY_DN3234_c0_g1	TRINITY_DN17778_c3_g1	TRINITY_DN19179_c0_g1	TRINITY_DN50192_c0_g1	TRINITY_DN17186_c0_g1	TRINITY_DN60174_c0_g1	OG0000640	1	1	1	1	1	1	1	1	1	1	OG0000640	TRINITY_DN33502_c1_g1	TRINITY_DN17778_c3_g1	TRINITY_DN60174_c0_g1	TRINITY_DN19179_c0_g1	TRINITY_DN50192_c0_g1	TRINITY_DN3234_c0_g1	TRINITY_DN17186_c0_g1
OG0000642		TRINITY_DN23223_c1_g1	TRINITY_DN3454_c1_g1, TRINITY_DN35178_c0_g1	TRINITY_DN13514_c8_g1, TRINITY_DN13959_c2_g2, TRINITY_DN16961_c3_g5	TRINITY_DN17883_c8_g1, TRINITY_DN18816_c3_g1	TRINITY_DN22679_c3_g6, TRINITY_DN23051_c7_g2		TRINITY_DN17552_c6_g2, TRINITY_DN19013_c10_g1, TRINITY_DN20673_c6_g1	TRINITY_DN40085_c0_g1, TRINITY_DN60557_c0_g1	OG0000642	0	1	2	3	2	2	0	3	2	0	OG0000642		TRINITY_DN23223_c1_g1	TRINITY_DN3454_c1_g1	TRINITY_DN13514_c8_g1	TRINITY_DN18816_c3_g1	TRINITY_DN23051_c7_g2		TRINITY_DN17552_c6_g2	TRINITY_DN40085_c0_g1	OG0000642	0	1	1	1	1	1	0	1	1	0	OG0000642	TRINITY_DN3454_c1_g1	TRINITY_DN18816_c3_g1	TRINITY_DN40085_c0_g1	TRINITY_DN23051_c7_g2	TRINITY_UK00000_c0_g1	TRINITY_DN13514_c8_g1	TRINITY_DN17552_c6_g2
OG0000645	TRINITY_DN19499_c0_g2	TRINITY_DN19937_c1_g1	TRINITY_DN35419_c1_g1, TRINITY_DN35419_c2_g1	TRINITY_DN25030_c0_g1	TRINITY_DN19271_c8_g2, TRINITY_DN19271_c8_g4	TRINITY_DN22227_c9_g4, TRINITY_DN24984_c0_g1, TRINITY_DN29695_c0_g1	TRINITY_DN23227_c5_g10	TRINITY_DN39852_c0_g1, TRINITY_DN4765_c0_g1	TRINITY_DN38921_c0_g1, TRINITY_DN38921_c0_g2	OG0000645	1	1	2	1	2	3	1	2	2	0	OG0000645	TRINITY_DN19499_c0_g2	TRINITY_DN19937_c1_g1	TRINITY_DN35419_c2_g1	TRINITY_DN25030_c0_g1	TRINITY_DN19271_c8_g4	TRINITY_DN29695_c0_g1	TRINITY_DN23227_c5_g10	TRINITY_DN4765_c0_g1	TRINITY_DN38921_c0_g2	OG0000645	1	1	1	1	1	1	1	1	1	1	OG0000645	TRINITY_DN35419_c2_g1	TRINITY_DN19271_c8_g4	TRINITY_DN38921_c0_g2	TRINITY_DN29695_c0_g1	TRINITY_DN23227_c5_g10	TRINITY_DN25030_c0_g1	TRINITY_DN4765_c0_g1
OG0000646		TRINITY_DN23638_c3_g6, TRINITY_DN45640_c0_g1	TRINITY_DN35597_c3_g1	TRINITY_DN11517_c0_g1, TRINITY_DN11517_c0_g3, TRINITY_DN6137_c0_g1	TRINITY_DN18200_c4_g4	TRINITY_DN21726_c4_g1, TRINITY_DN56646_c0_g1	TRINITY_DN22186_c1_g1, TRINITY_DN41470_c0_g1, TRINITY_DN46006_c0_g1	TRINITY_DN43158_c0_g1, TRINITY_DN6450_c0_g2	TRINITY_DN42643_c4_g2	OG0000646	0	2	1	3	1	2	3	2	1	0	OG0000646		TRINITY_DN23638_c3_g6	TRINITY_DN35597_c3_g1	TRINITY_DN6137_c0_g1	TRINITY_DN18200_c4_g4	TRINITY_DN21726_c4_g1	TRINITY_DN22186_c1_g1	TRINITY_DN43158_c0_g1	TRINITY_DN42643_c4_g2	OG0000646	0	1	1	1	1	1	1	1	1	0	OG0000646	TRINITY_DN35597_c3_g1	TRINITY_DN18200_c4_g4	TRINITY_DN42643_c4_g2	TRINITY_DN21726_c4_g1	TRINITY_DN22186_c1_g1	TRINITY_DN6137_c0_g1	TRINITY_DN43158_c0_g1
OG0000647	TRINITY_DN3810_c0_g2	TRINITY_DN19782_c8_g1	TRINITY_DN36514_c0_g1	TRINITY_DN9202_c0_g1, TRINITY_DN9202_c0_g2	TRINITY_DN7383_c0_g1, TRINITY_DN8385_c0_g1	TRINITY_DN17691_c0_g1, TRINITY_DN35921_c0_g1, TRINITY_DN61075_c0_g1	TRINITY_DN23486_c0_g1, TRINITY_DN25775_c0_g1	TRINITY_DN18914_c7_g2	TRINITY_DN63699_c0_g1, TRINITY_DN68858_c0_g1	OG0000647	1	1	1	2	2	3	2	1	2	0	OG0000647	TRINITY_DN3810_c0_g2	TRINITY_DN19782_c8_g1	TRINITY_DN36514_c0_g1	TRINITY_DN9202_c0_g1	TRINITY_DN8385_c0_g1	TRINITY_DN61075_c0_g1	TRINITY_DN25775_c0_g1	TRINITY_DN18914_c7_g2	TRINITY_DN68858_c0_g1	OG0000647	1	1	1	1	1	1	1	1	1	1	OG0000647	TRINITY_DN36514_c0_g1	TRINITY_DN8385_c0_g1	TRINITY_DN68858_c0_g1	TRINITY_DN61075_c0_g1	TRINITY_DN25775_c0_g1	TRINITY_DN9202_c0_g1	TRINITY_DN18914_c7_g2
OG0000648		TRINITY_DN19447_c3_g3	TRINITY_DN36817_c2_g1	TRINITY_DN1416_c0_g1, TRINITY_DN23756_c0_g1, TRINITY_DN25902_c0_g1	TRINITY_DN18958_c2_g4, TRINITY_DN19753_c2_g1	TRINITY_DN29105_c0_g1, TRINITY_DN37700_c0_g1, TRINITY_DN5881_c0_g1		TRINITY_DN19966_c5_g2, TRINITY_DN23363_c0_g1	TRINITY_DN1500_c0_g1, TRINITY_DN28524_c0_g1, TRINITY_DN47251_c2_g4	OG0000648	0	1	1	3	2	3	0	2	3	0	OG0000648		TRINITY_DN19447_c3_g3	TRINITY_DN36817_c2_g1	TRINITY_DN25902_c0_g1	TRINITY_DN19753_c2_g1	TRINITY_DN37700_c0_g1		TRINITY_DN19966_c5_g2	TRINITY_DN47251_c2_g4	OG0000648	0	1	1	1	1	1	0	1	1	0	OG0000648	TRINITY_DN36817_c2_g1	TRINITY_DN19753_c2_g1	TRINITY_DN47251_c2_g4	TRINITY_DN37700_c0_g1	TRINITY_UK00000_c0_g1	TRINITY_DN25902_c0_g1	TRINITY_DN19966_c5_g2
OG0000649	TRINITY_DN9126_c1_g1	TRINITY_DN20917_c6_g1, TRINITY_DN21852_c5_g1	TRINITY_DN3826_c1_g2	TRINITY_DN14704_c8_g1, TRINITY_DN14704_c8_g5	TRINITY_DN15568_c0_g1	TRINITY_DN22809_c9_g5, TRINITY_DN22809_c9_g7	TRINITY_DN19855_c3_g3, TRINITY_DN19855_c3_g6, TRINITY_DN19855_c3_g7	TRINITY_DN17766_c5_g1	TRINITY_DN40425_c0_g1, TRINITY_DN46896_c7_g1	OG0000649	1	2	1	2	1	2	3	1	2	0	OG0000649	TRINITY_DN9126_c1_g1	TRINITY_DN20917_c6_g1	TRINITY_DN3826_c1_g2	TRINITY_DN14704_c8_g5	TRINITY_DN15568_c0_g1	TRINITY_DN22809_c9_g5	TRINITY_DN19855_c3_g6	TRINITY_DN17766_c5_g1	TRINITY_DN40425_c0_g1	OG0000649	1	1	1	1	1	1	1	1	1	1	OG0000649	TRINITY_DN3826_c1_g2	TRINITY_DN15568_c0_g1	TRINITY_DN40425_c0_g1	TRINITY_DN22809_c9_g5	TRINITY_DN19855_c3_g6	TRINITY_DN14704_c8_g5	TRINITY_DN17766_c5_g1
OG0000651	TRINITY_DN2373_c0_g1	TRINITY_DN20301_c4_g3, TRINITY_DN21211_c4_g1, TRINITY_DN45918_c0_g1	TRINITY_DN38_c1_g2	TRINITY_DN20794_c3_g1, TRINITY_DN21060_c5_g2	TRINITY_DN18031_c2_g1, TRINITY_DN19426_c2_g3	TRINITY_DN23404_c4_g1	TRINITY_DN19959_c7_g1, TRINITY_DN25178_c3_g1	TRINITY_DN20056_c3_g3	TRINITY_DN46623_c5_g5, TRINITY_DN48460_c2_g1	OG0000651	1	3	1	2	2	1	2	1	2	0	OG0000651	TRINITY_DN2373_c0_g1	TRINITY_DN20301_c4_g3	TRINITY_DN38_c1_g2	TRINITY_DN20794_c3_g1	TRINITY_DN18031_c2_g1	TRINITY_DN23404_c4_g1	TRINITY_DN19959_c7_g1	TRINITY_DN20056_c3_g3	TRINITY_DN46623_c5_g5	OG0000651	1	1	1	1	1	1	1	1	1	1	OG0000651	TRINITY_DN38_c1_g2	TRINITY_DN18031_c2_g1	TRINITY_DN46623_c5_g5	TRINITY_DN23404_c4_g1	TRINITY_DN19959_c7_g1	TRINITY_DN20794_c3_g1	TRINITY_DN20056_c3_g3
OG0000654	TRINITY_DN4722_c0_g1	TRINITY_DN20085_c7_g2, TRINITY_DN65736_c0_g1	TRINITY_DN4164_c0_g1	TRINITY_DN13568_c6_g2, TRINITY_DN13788_c1_g1	TRINITY_DN18551_c0_g3, TRINITY_DN18551_c0_g8, TRINITY_DN18754_c6_g1	TRINITY_DN23285_c4_g4	TRINITY_DN22625_c7_g1, TRINITY_DN22757_c11_g4	TRINITY_DN18483_c5_g1, TRINITY_DN18881_c4_g2	TRINITY_DN45141_c1_g2	OG0000654	1	2	1	2	3	1	2	2	1	0	OG0000654	TRINITY_DN4722_c0_g1	TRINITY_DN20085_c7_g2	TRINITY_DN4164_c0_g1	TRINITY_DN13788_c1_g1	TRINITY_DN18754_c6_g1	TRINITY_DN23285_c4_g4	TRINITY_DN22625_c7_g1	TRINITY_DN18881_c4_g2	TRINITY_DN45141_c1_g2	OG0000654	1	1	1	1	1	1	1	1	1	1	OG0000654	TRINITY_DN4164_c0_g1	TRINITY_DN18754_c6_g1	TRINITY_DN45141_c1_g2	TRINITY_DN23285_c4_g4	TRINITY_DN22625_c7_g1	TRINITY_DN13788_c1_g1	TRINITY_DN18881_c4_g2
OG0000655	TRINITY_DN7459_c0_g3	TRINITY_DN22340_c3_g1, TRINITY_DN22340_c6_g1, TRINITY_DN9682_c0_g1	TRINITY_DN4282_c0_g2	TRINITY_DN14002_c4_g3, TRINITY_DN21136_c7_g1	TRINITY_DN19217_c5_g1	TRINITY_DN23695_c3_g1	TRINITY_DN22672_c13_g1	TRINITY_DN19468_c4_g1, TRINITY_DN19468_c4_g10, TRINITY_DN19468_c4_g7	TRINITY_DN41466_c0_g1, TRINITY_DN41466_c0_g2	OG0000655	1	3	1	2	1	1	1	3	2	0	OG0000655	TRINITY_DN7459_c0_g3	TRINITY_DN22340_c3_g1	TRINITY_DN4282_c0_g2	TRINITY_DN14002_c4_g3	TRINITY_DN19217_c5_g1	TRINITY_DN23695_c3_g1	TRINITY_DN22672_c13_g1	TRINITY_DN19468_c4_g10	TRINITY_DN41466_c0_g2	OG0000655	1	1	1	1	1	1	1	1	1	1	OG0000655	TRINITY_DN4282_c0_g2	TRINITY_DN19217_c5_g1	TRINITY_DN41466_c0_g2	TRINITY_DN23695_c3_g1	TRINITY_DN22672_c13_g1	TRINITY_DN14002_c4_g3	TRINITY_DN19468_c4_g10
OG0000656	TRINITY_DN1224_c4_g5, TRINITY_DN4248_c0_g1	TRINITY_DN23893_c3_g3	TRINITY_DN4288_c0_g2, TRINITY_DN4288_c2_g2	TRINITY_DN15847_c0_g1, TRINITY_DN20420_c8_g1	TRINITY_DN16336_c2_g2	TRINITY_DN23776_c5_g2	TRINITY_DN22053_c6_g1, TRINITY_DN23560_c4_g7	TRINITY_DN20167_c5_g1	TRINITY_DN31003_c0_g1, TRINITY_DN43368_c0_g2, TRINITY_DN47336_c7_g1	OG0000656	2	1	2	2	1	1	2	1	3	0	OG0000656	TRINITY_DN1224_c4_g5	TRINITY_DN23893_c3_g3	TRINITY_DN4288_c0_g2	TRINITY_DN15847_c0_g1	TRINITY_DN16336_c2_g2	TRINITY_DN23776_c5_g2	TRINITY_DN22053_c6_g1	TRINITY_DN20167_c5_g1	TRINITY_DN47336_c7_g1	OG0000656	1	1	1	1	1	1	1	1	1	1	OG0000656	TRINITY_DN4288_c0_g2	TRINITY_DN16336_c2_g2	TRINITY_DN47336_c7_g1	TRINITY_DN23776_c5_g2	TRINITY_DN22053_c6_g1	TRINITY_DN15847_c0_g1	TRINITY_DN20167_c5_g1
OG0000659	TRINITY_DN11_c0_g1	TRINITY_DN20110_c4_g2, TRINITY_DN20110_c4_g4	TRINITY_DN4634_c12_g1, TRINITY_DN83_c1_g1	TRINITY_DN19101_c6_g2	TRINITY_DN16237_c5_g1, TRINITY_DN16613_c6_g1	TRINITY_DN21670_c5_g3, TRINITY_DN24442_c3_g1	TRINITY_DN25200_c12_g1, TRINITY_DN25200_c12_g2	TRINITY_DN18089_c8_g1, TRINITY_DN18089_c8_g6	TRINITY_DN48367_c4_g1	OG0000659	1	2	2	1	2	2	2	2	1	0	OG0000659	TRINITY_DN11_c0_g1	TRINITY_DN20110_c4_g4	TRINITY_DN83_c1_g1	TRINITY_DN19101_c6_g2	TRINITY_DN16613_c6_g1	TRINITY_DN24442_c3_g1	TRINITY_DN25200_c12_g1	TRINITY_DN18089_c8_g6	TRINITY_DN48367_c4_g1	OG0000659	1	1	1	1	1	1	1	1	1	1	OG0000659	TRINITY_DN83_c1_g1	TRINITY_DN16613_c6_g1	TRINITY_DN48367_c4_g1	TRINITY_DN24442_c3_g1	TRINITY_DN25200_c12_g1	TRINITY_DN19101_c6_g2	TRINITY_DN18089_c8_g6
OG0000660	TRINITY_DN911_c0_g2	TRINITY_DN23683_c3_g1	TRINITY_DN46_c0_g2	TRINITY_DN20849_c4_g3, TRINITY_DN20849_c4_g4	TRINITY_DN19755_c7_g1	TRINITY_DN21842_c13_g1, TRINITY_DN22530_c4_g1, TRINITY_DN23795_c4_g2	TRINITY_DN23913_c11_g2, TRINITY_DN23990_c3_g1, TRINITY_DN24381_c5_g1	TRINITY_DN21341_c9_g1	TRINITY_DN44289_c5_g1, TRINITY_DN48899_c6_g1	OG0000660	1	1	1	2	1	3	3	1	2	0	OG0000660	TRINITY_DN911_c0_g2	TRINITY_DN23683_c3_g1	TRINITY_DN46_c0_g2	TRINITY_DN20849_c4_g3	TRINITY_DN19755_c7_g1	TRINITY_DN23795_c4_g2	TRINITY_DN23990_c3_g1	TRINITY_DN21341_c9_g1	TRINITY_DN44289_c5_g1	OG0000660	1	1	1	1	1	1	1	1	1	1	OG0000660	TRINITY_DN46_c0_g2	TRINITY_DN19755_c7_g1	TRINITY_DN44289_c5_g1	TRINITY_DN23795_c4_g2	TRINITY_DN23990_c3_g1	TRINITY_DN20849_c4_g3	TRINITY_DN21341_c9_g1
OG0000662	TRINITY_DN232_c4_g1	TRINITY_DN18429_c4_g1	TRINITY_DN499_c2_g1	TRINITY_DN18340_c3_g2, TRINITY_DN20514_c1_g1, TRINITY_DN20996_c2_g1	TRINITY_DN16762_c5_g2, TRINITY_DN17264_c5_g2	TRINITY_DN24328_c4_g2	TRINITY_DN22517_c8_g3, TRINITY_DN23130_c5_g1	TRINITY_DN20060_c7_g2, TRINITY_DN21189_c4_g1	TRINITY_DN45891_c2_g1, TRINITY_DN48301_c3_g1	OG0000662	1	1	1	3	2	1	2	2	2	0	OG0000662	TRINITY_DN232_c4_g1	TRINITY_DN18429_c4_g1	TRINITY_DN499_c2_g1	TRINITY_DN18340_c3_g2	TRINITY_DN17264_c5_g2	TRINITY_DN24328_c4_g2	TRINITY_DN22517_c8_g3	TRINITY_DN20060_c7_g2	TRINITY_DN48301_c3_g1	OG0000662	1	1	1	1	1	1	1	1	1	1	OG0000662	TRINITY_DN499_c2_g1	TRINITY_DN17264_c5_g2	TRINITY_DN48301_c3_g1	TRINITY_DN24328_c4_g2	TRINITY_DN22517_c8_g3	TRINITY_DN18340_c3_g2	TRINITY_DN20060_c7_g2
OG0000664		TRINITY_DN21148_c9_g1	TRINITY_DN52042_c0_g1, TRINITY_DN6186_c0_g2	TRINITY_DN13512_c8_g1, TRINITY_DN19418_c4_g1	TRINITY_DN18301_c2_g6, TRINITY_DN19244_c2_g2	TRINITY_DN21190_c0_g1, TRINITY_DN22156_c12_g1	TRINITY_DN19141_c2_g1, TRINITY_DN19386_c8_g1	TRINITY_DN18349_c4_g3, TRINITY_DN20353_c4_g1	TRINITY_DN43026_c0_g1, TRINITY_DN47931_c0_g2	OG0000664	0	1	2	2	2	2	2	2	2	0	OG0000664		TRINITY_DN21148_c9_g1	TRINITY_DN52042_c0_g1	TRINITY_DN13512_c8_g1	TRINITY_DN19244_c2_g2	TRINITY_DN21190_c0_g1	TRINITY_DN19386_c8_g1	TRINITY_DN18349_c4_g3	TRINITY_DN43026_c0_g1	OG0000664	0	1	1	1	1	1	1	1	1	0	OG0000664	TRINITY_DN52042_c0_g1	TRINITY_DN19244_c2_g2	TRINITY_DN43026_c0_g1	TRINITY_DN21190_c0_g1	TRINITY_DN19386_c8_g1	TRINITY_DN13512_c8_g1	TRINITY_DN18349_c4_g3
OG0000666	TRINITY_DN1434_c0_g2	TRINITY_DN18454_c4_g1	TRINITY_DN538_c0_g1, TRINITY_DN777_c1_g1	TRINITY_DN13982_c5_g1, TRINITY_DN18614_c4_g2, TRINITY_DN18614_c4_g6	TRINITY_DN18394_c6_g1	TRINITY_DN24334_c3_g1, TRINITY_DN24850_c1_g2	TRINITY_DN24278_c2_g1	TRINITY_DN18593_c4_g2	TRINITY_DN35745_c0_g1, TRINITY_DN42864_c5_g3, TRINITY_DN49073_c0_g1	OG0000666	1	1	2	3	1	2	1	1	3	0	OG0000666	TRINITY_DN1434_c0_g2	TRINITY_DN18454_c4_g1	TRINITY_DN777_c1_g1	TRINITY_DN13982_c5_g1	TRINITY_DN18394_c6_g1	TRINITY_DN24334_c3_g1	TRINITY_DN24278_c2_g1	TRINITY_DN18593_c4_g2	TRINITY_DN49073_c0_g1	OG0000666	1	1	1	1	1	1	1	1	1	1	OG0000666	TRINITY_DN777_c1_g1	TRINITY_DN18394_c6_g1	TRINITY_DN49073_c0_g1	TRINITY_DN24334_c3_g1	TRINITY_DN24278_c2_g1	TRINITY_DN13982_c5_g1	TRINITY_DN18593_c4_g2
OG0000668	TRINITY_DN10311_c0_g1, TRINITY_DN10311_c2_g1	TRINITY_DN20247_c5_g1	TRINITY_DN5965_c10_g1	TRINITY_DN18061_c7_g1	TRINITY_DN13242_c0_g1, TRINITY_DN14879_c0_g1	TRINITY_DN24787_c4_g3, TRINITY_DN30596_c0_g1	TRINITY_DN22821_c2_g1	TRINITY_DN14056_c0_g1, TRINITY_DN9520_c0_g1	TRINITY_DN27589_c0_g1, TRINITY_DN28457_c0_g2, TRINITY_DN6097_c0_g1	OG0000668	2	1	1	1	2	2	1	2	3	0	OG0000668	TRINITY_DN10311_c2_g1	TRINITY_DN20247_c5_g1	TRINITY_DN5965_c10_g1	TRINITY_DN18061_c7_g1	TRINITY_DN14879_c0_g1	TRINITY_DN30596_c0_g1	TRINITY_DN22821_c2_g1	TRINITY_DN14056_c0_g1	TRINITY_DN28457_c0_g2	OG0000668	1	1	1	1	1	1	1	1	1	1	OG0000668	TRINITY_DN5965_c10_g1	TRINITY_DN14879_c0_g1	TRINITY_DN28457_c0_g2	TRINITY_DN30596_c0_g1	TRINITY_DN22821_c2_g1	TRINITY_DN18061_c7_g1	TRINITY_DN14056_c0_g1
OG0000670	TRINITY_DN3539_c1_g1	TRINITY_DN19755_c7_g4, TRINITY_DN20211_c2_g1	TRINITY_DN61_c0_g1	TRINITY_DN16007_c7_g1, TRINITY_DN16007_c7_g2, TRINITY_DN20005_c5_g2	TRINITY_DN19163_c4_g1	TRINITY_DN24622_c4_g1, TRINITY_DN24622_c4_g3	TRINITY_DN24657_c4_g4	TRINITY_DN20047_c3_g1, TRINITY_DN20392_c3_g2	TRINITY_DN38050_c0_g1, TRINITY_DN48934_c2_g1	OG0000670	1	2	1	3	1	2	1	2	2	0	OG0000670	TRINITY_DN3539_c1_g1	TRINITY_DN19755_c7_g4	TRINITY_DN61_c0_g1	TRINITY_DN16007_c7_g1	TRINITY_DN19163_c4_g1	TRINITY_DN24622_c4_g3	TRINITY_DN24657_c4_g4	TRINITY_DN20392_c3_g2	TRINITY_DN48934_c2_g1	OG0000670	1	1	1	1	1	1	1	1	1	1	OG0000670	TRINITY_DN61_c0_g1	TRINITY_DN19163_c4_g1	TRINITY_DN48934_c2_g1	TRINITY_DN24622_c4_g3	TRINITY_DN24657_c4_g4	TRINITY_DN16007_c7_g1	TRINITY_DN20392_c3_g2
OG0000671	TRINITY_DN3054_c1_g1	TRINITY_DN22558_c6_g1, TRINITY_DN22558_c6_g4, TRINITY_DN33472_c0_g1	TRINITY_DN6385_c1_g1	TRINITY_DN19220_c2_g4, TRINITY_DN20024_c1_g1	TRINITY_DN17495_c4_g2, TRINITY_DN17495_c4_g4	TRINITY_DN23806_c10_g1	TRINITY_DN19170_c3_g3, TRINITY_DN24412_c6_g2	TRINITY_DN19816_c2_g1, TRINITY_DN20343_c4_g1	TRINITY_DN42815_c5_g1	OG0000671	1	3	1	2	2	1	2	2	1	0	OG0000671	TRINITY_DN3054_c1_g1	TRINITY_DN22558_c6_g4	TRINITY_DN6385_c1_g1	TRINITY_DN19220_c2_g4	TRINITY_DN17495_c4_g4	TRINITY_DN23806_c10_g1	TRINITY_DN24412_c6_g2	TRINITY_DN20343_c4_g1	TRINITY_DN42815_c5_g1	OG0000671	1	1	1	1	1	1	1	1	1	1	OG0000671	TRINITY_DN6385_c1_g1	TRINITY_DN17495_c4_g4	TRINITY_DN42815_c5_g1	TRINITY_DN23806_c10_g1	TRINITY_DN24412_c6_g2	TRINITY_DN19220_c2_g4	TRINITY_DN20343_c4_g1
OG0000673	TRINITY_DN24464_c1_g1	TRINITY_DN20118_c6_g1, TRINITY_DN23030_c1_g1	TRINITY_DN7030_c0_g1	TRINITY_DN14561_c4_g1, TRINITY_DN15498_c10_g3, TRINITY_DN18938_c7_g1	TRINITY_DN15612_c0_g1	TRINITY_DN40878_c0_g1, TRINITY_DN46271_c0_g1, TRINITY_DN51444_c0_g1	TRINITY_DN33737_c0_g1	TRINITY_DN1531_c0_g1	TRINITY_DN12830_c0_g1, TRINITY_DN90904_c0_g1	OG0000673	1	2	1	3	1	3	1	1	2	0	OG0000673	TRINITY_DN24464_c1_g1	TRINITY_DN23030_c1_g1	TRINITY_DN7030_c0_g1	TRINITY_DN18938_c7_g1	TRINITY_DN15612_c0_g1	TRINITY_DN51444_c0_g1	TRINITY_DN33737_c0_g1	TRINITY_DN1531_c0_g1	TRINITY_DN12830_c0_g1	OG0000673	1	1	1	1	1	1	1	1	1	1	OG0000673	TRINITY_DN7030_c0_g1	TRINITY_DN15612_c0_g1	TRINITY_DN12830_c0_g1	TRINITY_DN51444_c0_g1	TRINITY_DN33737_c0_g1	TRINITY_DN18938_c7_g1	TRINITY_DN1531_c0_g1
OG0000674	TRINITY_DN1110_c0_g1	TRINITY_DN22999_c4_g1	TRINITY_DN704_c0_g2	TRINITY_DN17149_c1_g2, TRINITY_DN18246_c4_g1, TRINITY_DN18901_c1_g1	TRINITY_DN18802_c7_g3, TRINITY_DN19739_c4_g1	TRINITY_DN24147_c9_g1	TRINITY_DN21425_c5_g1, TRINITY_DN23354_c7_g1	TRINITY_DN18016_c8_g1, TRINITY_DN20081_c2_g1	TRINITY_DN47558_c4_g2, TRINITY_DN47558_c4_g6	OG0000674	1	1	1	3	2	1	2	2	2	0	OG0000674	TRINITY_DN1110_c0_g1	TRINITY_DN22999_c4_g1	TRINITY_DN704_c0_g2	TRINITY_DN17149_c1_g2	TRINITY_DN19739_c4_g1	TRINITY_DN24147_c9_g1	TRINITY_DN21425_c5_g1	TRINITY_DN18016_c8_g1	TRINITY_DN47558_c4_g6	OG0000674	1	1	1	1	1	1	1	1	1	1	OG0000674	TRINITY_DN704_c0_g2	TRINITY_DN19739_c4_g1	TRINITY_DN47558_c4_g6	TRINITY_DN24147_c9_g1	TRINITY_DN21425_c5_g1	TRINITY_DN17149_c1_g2	TRINITY_DN18016_c8_g1
OG0000675	TRINITY_DN105_c0_g2, TRINITY_DN1903_c0_g2	TRINITY_DN19775_c3_g1, TRINITY_DN27569_c0_g1, TRINITY_DN38306_c0_g1	TRINITY_DN72_c0_g2		TRINITY_DN31754_c0_g1, TRINITY_DN45557_c0_g1, TRINITY_DN48086_c0_g1	TRINITY_DN21944_c5_g1	TRINITY_DN24111_c11_g2	TRINITY_DN17676_c6_g1, TRINITY_DN6876_c0_g1	TRINITY_DN31684_c0_g1, TRINITY_DN41093_c0_g1	OG0000675	2	3	1	0	3	1	1	2	2	0	OG0000675	TRINITY_DN105_c0_g2	TRINITY_DN19775_c3_g1	TRINITY_DN72_c0_g2		TRINITY_DN45557_c0_g1	TRINITY_DN21944_c5_g1	TRINITY_DN24111_c11_g2	TRINITY_DN6876_c0_g1	TRINITY_DN41093_c0_g1	OG0000675	1	1	1	0	1	1	1	1	1	0	OG0000675	TRINITY_DN72_c0_g2	TRINITY_DN45557_c0_g1	TRINITY_DN41093_c0_g1	TRINITY_DN21944_c5_g1	TRINITY_DN24111_c11_g2	TRINITY_UK00000_c0_g1	TRINITY_DN6876_c0_g1
OG0000683	TRINITY_DN18914_c1_g1, TRINITY_DN5556_c0_g2, TRINITY_DN60608_c0_g1	TRINITY_DN17968_c0_g1, TRINITY_DN19670_c6_g1, TRINITY_DN60319_c0_g1	TRINITY_DN867_c2_g1	TRINITY_DN13148_c4_g1	TRINITY_DN25263_c0_g1, TRINITY_DN34417_c0_g1	TRINITY_DN23447_c8_g2, TRINITY_DN29474_c0_g1	TRINITY_DN24838_c7_g2	TRINITY_DN18189_c2_g2	TRINITY_DN40480_c0_g1	OG0000683	3	3	1	1	2	2	1	1	1	0	OG0000683	TRINITY_DN5556_c0_g2	TRINITY_DN19670_c6_g1	TRINITY_DN867_c2_g1	TRINITY_DN13148_c4_g1	TRINITY_DN25263_c0_g1	TRINITY_DN23447_c8_g2	TRINITY_DN24838_c7_g2	TRINITY_DN18189_c2_g2	TRINITY_DN40480_c0_g1	OG0000683	1	1	1	1	1	1	1	1	1	1	OG0000683	TRINITY_DN867_c2_g1	TRINITY_DN25263_c0_g1	TRINITY_DN40480_c0_g1	TRINITY_DN23447_c8_g2	TRINITY_DN24838_c7_g2	TRINITY_DN13148_c4_g1	TRINITY_DN18189_c2_g2
OG0000684	TRINITY_DN100_c0_g2	TRINITY_DN22091_c0_g1, TRINITY_DN55720_c0_g1, TRINITY_DN58726_c0_g1	TRINITY_DN86_c1_g1	TRINITY_DN15032_c7_g1, TRINITY_DN17291_c6_g2	TRINITY_DN19521_c1_g1	TRINITY_DN23899_c0_g1	TRINITY_DN23881_c2_g1	TRINITY_DN19824_c8_g1, TRINITY_DN19824_c8_g3, TRINITY_DN20227_c9_g1	TRINITY_DN39576_c0_g1, TRINITY_DN48598_c2_g1	OG0000684	1	3	1	2	1	1	1	3	2	0	OG0000684	TRINITY_DN100_c0_g2	TRINITY_DN22091_c0_g1	TRINITY_DN86_c1_g1	TRINITY_DN17291_c6_g2	TRINITY_DN19521_c1_g1	TRINITY_DN23899_c0_g1	TRINITY_DN23881_c2_g1	TRINITY_DN20227_c9_g1	TRINITY_DN39576_c0_g1	OG0000684	1	1	1	1	1	1	1	1	1	1	OG0000684	TRINITY_DN86_c1_g1	TRINITY_DN19521_c1_g1	TRINITY_DN39576_c0_g1	TRINITY_DN23899_c0_g1	TRINITY_DN23881_c2_g1	TRINITY_DN17291_c6_g2	TRINITY_DN20227_c9_g1
OG0000687		TRINITY_DN19887_c5_g4, TRINITY_DN23494_c6_g1	TRINITY_DN90_c0_g1	TRINITY_DN19166_c3_g2, TRINITY_DN19711_c13_g1	TRINITY_DN17682_c0_g3	TRINITY_DN21414_c3_g2, TRINITY_DN23296_c4_g3, TRINITY_DN23296_c4_g4	TRINITY_DN22041_c6_g1, TRINITY_DN24756_c6_g2	TRINITY_DN18000_c2_g3, TRINITY_DN19681_c2_g5	TRINITY_DN44031_c2_g1, TRINITY_DN44360_c3_g1	OG0000687	0	2	1	2	1	3	2	2	2	0	OG0000687		TRINITY_DN19887_c5_g4	TRINITY_DN90_c0_g1	TRINITY_DN19166_c3_g2	TRINITY_DN17682_c0_g3	TRINITY_DN23296_c4_g3	TRINITY_DN22041_c6_g1	TRINITY_DN19681_c2_g5	TRINITY_DN44360_c3_g1	OG0000687	0	1	1	1	1	1	1	1	1	0	OG0000687	TRINITY_DN90_c0_g1	TRINITY_DN17682_c0_g3	TRINITY_DN44360_c3_g1	TRINITY_DN23296_c4_g3	TRINITY_DN22041_c6_g1	TRINITY_DN19166_c3_g2	TRINITY_DN19681_c2_g5
OG0000694	TRINITY_DN2242_c0_g2	TRINITY_DN18901_c5_g1, TRINITY_DN18901_c5_g2, TRINITY_DN22467_c3_g2	TRINITY_DN0_c0_g4, TRINITY_DN0_c7_g1	TRINITY_DN18050_c0_g1	TRINITY_DN17228_c2_g1	TRINITY_DN22126_c6_g20	TRINITY_DN19066_c4_g5, TRINITY_DN24033_c2_g8	TRINITY_DN18256_c9_g2, TRINITY_DN21257_c5_g5	TRINITY_DN43136_c6_g1	OG0000694	1	3	2	1	1	1	2	2	1	0	OG0000694	TRINITY_DN2242_c0_g2	TRINITY_DN18901_c5_g1	TRINITY_DN0_c0_g4	TRINITY_DN18050_c0_g1	TRINITY_DN17228_c2_g1	TRINITY_DN22126_c6_g20	TRINITY_DN19066_c4_g5	TRINITY_DN18256_c9_g2	TRINITY_DN43136_c6_g1	OG0000694	1	1	1	1	1	1	1	1	1	1	OG0000694	TRINITY_DN0_c0_g4	TRINITY_DN17228_c2_g1	TRINITY_DN43136_c6_g1	TRINITY_DN22126_c6_g20	TRINITY_DN19066_c4_g5	TRINITY_DN18050_c0_g1	TRINITY_DN18256_c9_g2
OG0000696		TRINITY_DN18707_c4_g1, TRINITY_DN23455_c7_g1	TRINITY_DN100_c0_g4	TRINITY_DN21317_c0_g1	TRINITY_DN19191_c2_g2, TRINITY_DN19192_c5_g2	TRINITY_DN22593_c4_g1, TRINITY_DN24758_c4_g1	TRINITY_DN24790_c2_g1	TRINITY_DN20726_c2_g1, TRINITY_DN20726_c2_g2, TRINITY_DN21352_c5_g4	TRINITY_DN38779_c0_g1, TRINITY_DN48940_c3_g1	OG0000696	0	2	1	1	2	2	1	3	2	0	OG0000696		TRINITY_DN23455_c7_g1	TRINITY_DN100_c0_g4	TRINITY_DN21317_c0_g1	TRINITY_DN19191_c2_g2	TRINITY_DN22593_c4_g1	TRINITY_DN24790_c2_g1	TRINITY_DN20726_c2_g1	TRINITY_DN38779_c0_g1	OG0000696	0	1	1	1	1	1	1	1	1	0	OG0000696	TRINITY_DN100_c0_g4	TRINITY_DN19191_c2_g2	TRINITY_DN38779_c0_g1	TRINITY_DN22593_c4_g1	TRINITY_DN24790_c2_g1	TRINITY_DN21317_c0_g1	TRINITY_DN20726_c2_g1
OG0000697	TRINITY_DN44842_c1_g1	TRINITY_DN18770_c5_g3	TRINITY_DN10159_c15_g1	TRINITY_DN18394_c1_g1, TRINITY_DN18394_c1_g2	TRINITY_DN11816_c0_g1, TRINITY_DN11816_c0_g2, TRINITY_DN11816_c0_g3	TRINITY_DN25291_c0_g1	TRINITY_DN44615_c0_g1, TRINITY_DN8604_c0_g1, TRINITY_DN8604_c0_g2	TRINITY_DN28661_c0_g1	TRINITY_DN40003_c0_g1	OG0000697	1	1	1	2	3	1	3	1	1	0	OG0000697	TRINITY_DN44842_c1_g1	TRINITY_DN18770_c5_g3	TRINITY_DN10159_c15_g1	TRINITY_DN18394_c1_g1	TRINITY_DN11816_c0_g2	TRINITY_DN25291_c0_g1	TRINITY_DN8604_c0_g1	TRINITY_DN28661_c0_g1	TRINITY_DN40003_c0_g1	OG0000697	1	1	1	1	1	1	1	1	1	1	OG0000697	TRINITY_DN10159_c15_g1	TRINITY_DN11816_c0_g2	TRINITY_DN40003_c0_g1	TRINITY_DN25291_c0_g1	TRINITY_DN8604_c0_g1	TRINITY_DN18394_c1_g1	TRINITY_DN28661_c0_g1
OG0000698	TRINITY_DN250_c1_g2	TRINITY_DN18250_c3_g1	TRINITY_DN1033_c1_g1	TRINITY_DN18365_c1_g1, TRINITY_DN20330_c17_g1, TRINITY_DN20793_c13_g1	TRINITY_DN17764_c9_g1, TRINITY_DN19479_c2_g4	TRINITY_DN24159_c6_g2, TRINITY_DN24159_c6_g5	TRINITY_DN24219_c3_g1	TRINITY_DN20425_c8_g1, TRINITY_DN21291_c11_g1	TRINITY_DN47503_c0_g2	OG0000698	1	1	1	3	2	2	1	2	1	0	OG0000698	TRINITY_DN250_c1_g2	TRINITY_DN18250_c3_g1	TRINITY_DN1033_c1_g1	TRINITY_DN18365_c1_g1	TRINITY_DN19479_c2_g4	TRINITY_DN24159_c6_g2	TRINITY_DN24219_c3_g1	TRINITY_DN20425_c8_g1	TRINITY_DN47503_c0_g2	OG0000698	1	1	1	1	1	1	1	1	1	1	OG0000698	TRINITY_DN1033_c1_g1	TRINITY_DN19479_c2_g4	TRINITY_DN47503_c0_g2	TRINITY_DN24159_c6_g2	TRINITY_DN24219_c3_g1	TRINITY_DN18365_c1_g1	TRINITY_DN20425_c8_g1
OG0000699	TRINITY_DN1186_c0_g1	TRINITY_DN22596_c6_g1, TRINITY_DN42062_c0_g1, TRINITY_DN58741_c0_g1	TRINITY_DN105_c0_g2	TRINITY_DN20260_c5_g1	TRINITY_DN19586_c5_g1, TRINITY_DN19586_c5_g2	TRINITY_DN24843_c6_g1, TRINITY_DN24843_c6_g2	TRINITY_DN23954_c5_g1, TRINITY_DN24851_c7_g1	TRINITY_DN21295_c7_g2	TRINITY_DN48961_c2_g1	OG0000699	1	3	1	1	2	2	2	1	1	0	OG0000699	TRINITY_DN1186_c0_g1	TRINITY_DN22596_c6_g1	TRINITY_DN105_c0_g2	TRINITY_DN20260_c5_g1	TRINITY_DN19586_c5_g2	TRINITY_DN24843_c6_g2	TRINITY_DN23954_c5_g1	TRINITY_DN21295_c7_g2	TRINITY_DN48961_c2_g1	OG0000699	1	1	1	1	1	1	1	1	1	1	OG0000699	TRINITY_DN105_c0_g2	TRINITY_DN19586_c5_g2	TRINITY_DN48961_c2_g1	TRINITY_DN24843_c6_g2	TRINITY_DN23954_c5_g1	TRINITY_DN20260_c5_g1	TRINITY_DN21295_c7_g2
OG0000700	TRINITY_DN2063_c1_g1	TRINITY_DN2024_c0_g1	TRINITY_DN10707_c0_g1, TRINITY_DN1917_c2_g2	TRINITY_DN17228_c11_g1	TRINITY_DN17660_c8_g3	TRINITY_DN22855_c8_g5, TRINITY_DN23317_c7_g4	TRINITY_DN18715_c0_g1, TRINITY_DN18715_c0_g2	TRINITY_DN18980_c5_g1, TRINITY_DN19568_c10_g2	TRINITY_DN43043_c7_g5, TRINITY_DN43162_c1_g1	OG0000700	1	1	2	1	1	2	2	2	2	0	OG0000700	TRINITY_DN2063_c1_g1	TRINITY_DN2024_c0_g1	TRINITY_DN10707_c0_g1	TRINITY_DN17228_c11_g1	TRINITY_DN17660_c8_g3	TRINITY_DN23317_c7_g4	TRINITY_DN18715_c0_g1	TRINITY_DN19568_c10_g2	TRINITY_DN43162_c1_g1	OG0000700	1	1	1	1	1	1	1	1	1	1	OG0000700	TRINITY_DN10707_c0_g1	TRINITY_DN17660_c8_g3	TRINITY_DN43162_c1_g1	TRINITY_DN23317_c7_g4	TRINITY_DN18715_c0_g1	TRINITY_DN17228_c11_g1	TRINITY_DN19568_c10_g2
OG0000701	TRINITY_DN3208_c0_g1, TRINITY_DN3965_c0_g2	TRINITY_DN19109_c3_g1, TRINITY_DN19141_c6_g1	TRINITY_DN1072_c5_g1, TRINITY_DN250_c0_g2	TRINITY_DN20520_c3_g1	TRINITY_DN17414_c5_g1	TRINITY_DN21805_c7_g2, TRINITY_DN24826_c6_g1	TRINITY_DN22638_c1_g2	TRINITY_DN19282_c2_g1	TRINITY_DN44721_c2_g1, TRINITY_DN48627_c1_g2	OG0000701	2	2	2	1	1	2	1	1	2	0	OG0000701	TRINITY_DN3965_c0_g2	TRINITY_DN19141_c6_g1	TRINITY_DN250_c0_g2	TRINITY_DN20520_c3_g1	TRINITY_DN17414_c5_g1	TRINITY_DN21805_c7_g2	TRINITY_DN22638_c1_g2	TRINITY_DN19282_c2_g1	TRINITY_DN44721_c2_g1	OG0000701	1	1	1	1	1	1	1	1	1	1	OG0000701	TRINITY_DN250_c0_g2	TRINITY_DN17414_c5_g1	TRINITY_DN44721_c2_g1	TRINITY_DN21805_c7_g2	TRINITY_DN22638_c1_g2	TRINITY_DN20520_c3_g1	TRINITY_DN19282_c2_g1
OG0000702	TRINITY_DN5175_c0_g2	TRINITY_DN19907_c10_g3, TRINITY_DN19907_c15_g1	TRINITY_DN10796_c0_g1	TRINITY_DN20211_c6_g1, TRINITY_DN21378_c4_g3, TRINITY_DN21378_c4_g4	TRINITY_DN17783_c6_g3	TRINITY_DN24414_c9_g3	TRINITY_DN19441_c4_g1, TRINITY_DN19441_c4_g3	TRINITY_DN18850_c3_g1	TRINITY_DN44386_c7_g1, TRINITY_DN48294_c7_g1	OG0000702	1	2	1	3	1	1	2	1	2	0	OG0000702	TRINITY_DN5175_c0_g2	TRINITY_DN19907_c10_g3	TRINITY_DN10796_c0_g1	TRINITY_DN21378_c4_g4	TRINITY_DN17783_c6_g3	TRINITY_DN24414_c9_g3	TRINITY_DN19441_c4_g3	TRINITY_DN18850_c3_g1	TRINITY_DN48294_c7_g1	OG0000702	1	1	1	1	1	1	1	1	1	1	OG0000702	TRINITY_DN10796_c0_g1	TRINITY_DN17783_c6_g3	TRINITY_DN48294_c7_g1	TRINITY_DN24414_c9_g3	TRINITY_DN19441_c4_g3	TRINITY_DN21378_c4_g4	TRINITY_DN18850_c3_g1
OG0000703	TRINITY_DN13463_c1_g1	TRINITY_DN21847_c6_g3	TRINITY_DN10898_c1_g1	TRINITY_DN14143_c5_g1, TRINITY_DN14917_c14_g1	TRINITY_DN18108_c3_g4	TRINITY_DN22138_c7_g2, TRINITY_DN23973_c5_g1, TRINITY_DN23973_c5_g2	TRINITY_DN19350_c9_g1	TRINITY_DN17729_c0_g2, TRINITY_DN18290_c9_g1	TRINITY_DN40704_c1_g1, TRINITY_DN48795_c1_g1	OG0000703	1	1	1	2	1	3	1	2	2	0	OG0000703	TRINITY_DN13463_c1_g1	TRINITY_DN21847_c6_g3	TRINITY_DN10898_c1_g1	TRINITY_DN14917_c14_g1	TRINITY_DN18108_c3_g4	TRINITY_DN23973_c5_g1	TRINITY_DN19350_c9_g1	TRINITY_DN17729_c0_g2	TRINITY_DN40704_c1_g1	OG0000703	1	1	1	1	1	1	1	1	1	1	OG0000703	TRINITY_DN10898_c1_g1	TRINITY_DN18108_c3_g4	TRINITY_DN40704_c1_g1	TRINITY_DN23973_c5_g1	TRINITY_DN19350_c9_g1	TRINITY_DN14917_c14_g1	TRINITY_DN17729_c0_g2
OG0000704	TRINITY_DN1846_c0_g3	TRINITY_DN20291_c3_g1, TRINITY_DN29097_c0_g1	TRINITY_DN1096_c1_g3	TRINITY_DN20904_c9_g1	TRINITY_DN19540_c6_g1	TRINITY_DN21589_c0_g1	TRINITY_DN20932_c4_g1	TRINITY_DN16792_c0_g1, TRINITY_DN16792_c0_g2, TRINITY_DN16792_c0_g3	TRINITY_DN44762_c0_g1, TRINITY_DN44762_c1_g1, TRINITY_DN63521_c0_g1	OG0000704	1	2	1	1	1	1	1	3	3	0	OG0000704	TRINITY_DN1846_c0_g3	TRINITY_DN29097_c0_g1	TRINITY_DN1096_c1_g3	TRINITY_DN20904_c9_g1	TRINITY_DN19540_c6_g1	TRINITY_DN21589_c0_g1	TRINITY_DN20932_c4_g1	TRINITY_DN16792_c0_g3	TRINITY_DN44762_c0_g1	OG0000704	1	1	1	1	1	1	1	1	1	1	OG0000704	TRINITY_DN1096_c1_g3	TRINITY_DN19540_c6_g1	TRINITY_DN44762_c0_g1	TRINITY_DN21589_c0_g1	TRINITY_DN20932_c4_g1	TRINITY_DN20904_c9_g1	TRINITY_DN16792_c0_g3
OG0000707	TRINITY_DN1439_c1_g2	TRINITY_DN18694_c11_g3, TRINITY_DN23807_c3_g1	TRINITY_DN1122_c3_g1	TRINITY_DN14416_c7_g2, TRINITY_DN14430_c7_g1	TRINITY_DN18056_c3_g1, TRINITY_DN18534_c7_g1	TRINITY_DN23369_c1_g1, TRINITY_DN24596_c7_g1	TRINITY_DN24447_c2_g1	TRINITY_DN20166_c4_g10, TRINITY_DN20166_c4_g12	TRINITY_DN48281_c0_g1	OG0000707	1	2	1	2	2	2	1	2	1	0	OG0000707	TRINITY_DN1439_c1_g2	TRINITY_DN23807_c3_g1	TRINITY_DN1122_c3_g1	TRINITY_DN14430_c7_g1	TRINITY_DN18534_c7_g1	TRINITY_DN24596_c7_g1	TRINITY_DN24447_c2_g1	TRINITY_DN20166_c4_g10	TRINITY_DN48281_c0_g1	OG0000707	1	1	1	1	1	1	1	1	1	1	OG0000707	TRINITY_DN1122_c3_g1	TRINITY_DN18534_c7_g1	TRINITY_DN48281_c0_g1	TRINITY_DN24596_c7_g1	TRINITY_DN24447_c2_g1	TRINITY_DN14430_c7_g1	TRINITY_DN20166_c4_g10
OG0000708	TRINITY_DN2432_c0_g2	TRINITY_DN18334_c7_g2	TRINITY_DN1143_c0_g1	TRINITY_DN16222_c6_g1, TRINITY_DN20672_c3_g1	TRINITY_DN17233_c8_g1, TRINITY_DN18800_c7_g2	TRINITY_DN23125_c6_g1, TRINITY_DN23322_c4_g1	TRINITY_DN19232_c6_g2	TRINITY_DN17441_c0_g1, TRINITY_DN20851_c1_g3	TRINITY_DN41382_c0_g1, TRINITY_DN45870_c3_g1	OG0000708	1	1	1	2	2	2	1	2	2	0	OG0000708	TRINITY_DN2432_c0_g2	TRINITY_DN18334_c7_g2	TRINITY_DN1143_c0_g1	TRINITY_DN16222_c6_g1	TRINITY_DN18800_c7_g2	TRINITY_DN23322_c4_g1	TRINITY_DN19232_c6_g2	TRINITY_DN20851_c1_g3	TRINITY_DN45870_c3_g1	OG0000708	1	1	1	1	1	1	1	1	1	1	OG0000708	TRINITY_DN1143_c0_g1	TRINITY_DN18800_c7_g2	TRINITY_DN45870_c3_g1	TRINITY_DN23322_c4_g1	TRINITY_DN19232_c6_g2	TRINITY_DN16222_c6_g1	TRINITY_DN20851_c1_g3
OG0000710	TRINITY_DN1791_c1_g1	TRINITY_DN19683_c6_g1, TRINITY_DN21677_c12_g1, TRINITY_DN6055_c0_g1	TRINITY_DN116_c4_g1	TRINITY_DN15788_c5_g2	TRINITY_DN18641_c5_g1	TRINITY_DN23801_c5_g1, TRINITY_DN23801_c5_g5, TRINITY_DN24388_c10_g1	TRINITY_DN19202_c1_g1, TRINITY_DN22040_c4_g3	TRINITY_DN21238_c5_g1	TRINITY_DN47571_c6_g1	OG0000710	1	3	1	1	1	3	2	1	1	0	OG0000710	TRINITY_DN1791_c1_g1	TRINITY_DN19683_c6_g1	TRINITY_DN116_c4_g1	TRINITY_DN15788_c5_g2	TRINITY_DN18641_c5_g1	TRINITY_DN23801_c5_g1	TRINITY_DN19202_c1_g1	TRINITY_DN21238_c5_g1	TRINITY_DN47571_c6_g1	OG0000710	1	1	1	1	1	1	1	1	1	1	OG0000710	TRINITY_DN116_c4_g1	TRINITY_DN18641_c5_g1	TRINITY_DN47571_c6_g1	TRINITY_DN23801_c5_g1	TRINITY_DN19202_c1_g1	TRINITY_DN15788_c5_g2	TRINITY_DN21238_c5_g1
OG0000711	TRINITY_DN3528_c5_g1	TRINITY_DN20276_c5_g1, TRINITY_DN33687_c0_g1	TRINITY_DN11803_c0_g3	TRINITY_DN13834_c4_g4, TRINITY_DN15416_c8_g2	TRINITY_DN15312_c0_g1, TRINITY_DN18651_c8_g1	TRINITY_DN23097_c9_g2	TRINITY_DN21186_c3_g2	TRINITY_DN17859_c5_g6, TRINITY_DN17859_c5_g9	TRINITY_DN43160_c9_g1, TRINITY_DN60960_c0_g1	OG0000711	1	2	1	2	2	1	1	2	2	0	OG0000711	TRINITY_DN3528_c5_g1	TRINITY_DN20276_c5_g1	TRINITY_DN11803_c0_g3	TRINITY_DN15416_c8_g2	TRINITY_DN15312_c0_g1	TRINITY_DN23097_c9_g2	TRINITY_DN21186_c3_g2	TRINITY_DN17859_c5_g9	TRINITY_DN60960_c0_g1	OG0000711	1	1	1	1	1	1	1	1	1	1	OG0000711	TRINITY_DN11803_c0_g3	TRINITY_DN15312_c0_g1	TRINITY_DN60960_c0_g1	TRINITY_DN23097_c9_g2	TRINITY_DN21186_c3_g2	TRINITY_DN15416_c8_g2	TRINITY_DN17859_c5_g9
OG0000713	TRINITY_DN47_c2_g4	TRINITY_DN19581_c0_g1	TRINITY_DN12140_c1_g1	TRINITY_DN15435_c4_g1	TRINITY_DN18817_c4_g1	TRINITY_DN17925_c0_g2, TRINITY_DN24411_c9_g5	TRINITY_DN24649_c0_g1	TRINITY_DN19242_c8_g1, TRINITY_DN19242_c8_g2, TRINITY_DN19242_c8_g3	TRINITY_DN23055_c0_g1, TRINITY_DN46725_c1_g2, TRINITY_DN55811_c0_g1	OG0000713	1	1	1	1	1	2	1	3	3	0	OG0000713	TRINITY_DN47_c2_g4	TRINITY_DN19581_c0_g1	TRINITY_DN12140_c1_g1	TRINITY_DN15435_c4_g1	TRINITY_DN18817_c4_g1	TRINITY_DN24411_c9_g5	TRINITY_DN24649_c0_g1	TRINITY_DN19242_c8_g1	TRINITY_DN23055_c0_g1	OG0000713	1	1	1	1	1	1	1	1	1	1	OG0000713	TRINITY_DN12140_c1_g1	TRINITY_DN18817_c4_g1	TRINITY_DN23055_c0_g1	TRINITY_DN24411_c9_g5	TRINITY_DN24649_c0_g1	TRINITY_DN15435_c4_g1	TRINITY_DN19242_c8_g1
OG0000714	TRINITY_DN1386_c7_g2, TRINITY_DN6136_c3_g1	TRINITY_DN21564_c5_g1	TRINITY_DN122_c7_g2	TRINITY_DN15673_c7_g1, TRINITY_DN15673_c7_g2, TRINITY_DN19479_c0_g2	TRINITY_DN19738_c10_g2	TRINITY_DN24777_c1_g2	TRINITY_DN22956_c5_g2	TRINITY_DN21070_c3_g2, TRINITY_DN21330_c3_g3	TRINITY_DN39274_c0_g2, TRINITY_DN48816_c2_g1	OG0000714	2	1	1	3	1	1	1	2	2	0	OG0000714	TRINITY_DN6136_c3_g1	TRINITY_DN21564_c5_g1	TRINITY_DN122_c7_g2	TRINITY_DN15673_c7_g2	TRINITY_DN19738_c10_g2	TRINITY_DN24777_c1_g2	TRINITY_DN22956_c5_g2	TRINITY_DN21070_c3_g2	TRINITY_DN48816_c2_g1	OG0000714	1	1	1	1	1	1	1	1	1	1	OG0000714	TRINITY_DN122_c7_g2	TRINITY_DN19738_c10_g2	TRINITY_DN48816_c2_g1	TRINITY_DN24777_c1_g2	TRINITY_DN22956_c5_g2	TRINITY_DN15673_c7_g2	TRINITY_DN21070_c3_g2
OG0000715	TRINITY_DN941_c3_g1	TRINITY_DN22652_c3_g1	TRINITY_DN12747_c1_g4	TRINITY_DN16317_c0_g1, TRINITY_DN16317_c0_g2	TRINITY_DN18667_c8_g1	TRINITY_DN17700_c0_g1, TRINITY_DN17981_c0_g1	TRINITY_DN20358_c6_g1	TRINITY_DN3803_c0_g1, TRINITY_DN38556_c0_g1	TRINITY_DN38923_c0_g1, TRINITY_DN38923_c0_g2, TRINITY_DN39351_c0_g1	OG0000715	1	1	1	2	1	2	1	2	3	0	OG0000715	TRINITY_DN941_c3_g1	TRINITY_DN22652_c3_g1	TRINITY_DN12747_c1_g4	TRINITY_DN16317_c0_g1	TRINITY_DN18667_c8_g1	TRINITY_DN17700_c0_g1	TRINITY_DN20358_c6_g1	TRINITY_DN3803_c0_g1	TRINITY_DN38923_c0_g1	OG0000715	1	1	1	1	1	1	1	1	1	1	OG0000715	TRINITY_DN12747_c1_g4	TRINITY_DN18667_c8_g1	TRINITY_DN38923_c0_g1	TRINITY_DN17700_c0_g1	TRINITY_DN20358_c6_g1	TRINITY_DN16317_c0_g1	TRINITY_DN3803_c0_g1
OG0000720	TRINITY_DN382_c10_g1, TRINITY_DN3909_c0_g2	TRINITY_DN23860_c6_g1, TRINITY_DN23860_c6_g2, TRINITY_DN23860_c6_g3	TRINITY_DN14228_c0_g2	TRINITY_DN17643_c2_g2, TRINITY_DN21138_c5_g2	TRINITY_DN18642_c2_g1	TRINITY_DN23027_c5_g2, TRINITY_DN23027_c5_g3	TRINITY_DN18317_c1_g1	TRINITY_DN18026_c13_g1	TRINITY_DN44626_c0_g1	OG0000720	2	3	1	2	1	2	1	1	1	0	OG0000720	TRINITY_DN382_c10_g1	TRINITY_DN23860_c6_g1	TRINITY_DN14228_c0_g2	TRINITY_DN17643_c2_g2	TRINITY_DN18642_c2_g1	TRINITY_DN23027_c5_g3	TRINITY_DN18317_c1_g1	TRINITY_DN18026_c13_g1	TRINITY_DN44626_c0_g1	OG0000720	1	1	1	1	1	1	1	1	1	1	OG0000720	TRINITY_DN14228_c0_g2	TRINITY_DN18642_c2_g1	TRINITY_DN44626_c0_g1	TRINITY_DN23027_c5_g3	TRINITY_DN18317_c1_g1	TRINITY_DN17643_c2_g2	TRINITY_DN18026_c13_g1
OG0000723	TRINITY_DN4152_c0_g1	TRINITY_DN18177_c13_g3	TRINITY_DN14650_c0_g1	TRINITY_DN16125_c3_g1	TRINITY_DN15433_c0_g1	TRINITY_DN15989_c0_g1, TRINITY_DN15989_c0_g2	TRINITY_DN22513_c0_g1	TRINITY_DN17758_c8_g1, TRINITY_DN17758_c8_g2, TRINITY_DN17758_c8_g3	TRINITY_DN29821_c0_g1, TRINITY_DN33616_c0_g1, TRINITY_DN94926_c0_g1	OG0000723	1	1	1	1	1	2	1	3	3	0	OG0000723	TRINITY_DN4152_c0_g1	TRINITY_DN18177_c13_g3	TRINITY_DN14650_c0_g1	TRINITY_DN16125_c3_g1	TRINITY_DN15433_c0_g1	TRINITY_DN15989_c0_g1	TRINITY_DN22513_c0_g1	TRINITY_DN17758_c8_g2	TRINITY_DN29821_c0_g1	OG0000723	1	1	1	1	1	1	1	1	1	1	OG0000723	TRINITY_DN14650_c0_g1	TRINITY_DN15433_c0_g1	TRINITY_DN29821_c0_g1	TRINITY_DN15989_c0_g1	TRINITY_DN22513_c0_g1	TRINITY_DN16125_c3_g1	TRINITY_DN17758_c8_g2
OG0000724	TRINITY_DN1349_c2_g2	TRINITY_DN20287_c3_g1, TRINITY_DN44541_c0_g1	TRINITY_DN14905_c0_g3	TRINITY_DN12758_c3_g5, TRINITY_DN19577_c5_g1	TRINITY_DN18774_c7_g3	TRINITY_DN22785_c13_g4, TRINITY_DN23369_c4_g1	TRINITY_DN23697_c11_g1	TRINITY_DN20407_c10_g2, TRINITY_DN20747_c3_g2, TRINITY_DN20747_c3_g5	TRINITY_DN42346_c2_g2	OG0000724	1	2	1	2	1	2	1	3	1	0	OG0000724	TRINITY_DN1349_c2_g2	TRINITY_DN20287_c3_g1	TRINITY_DN14905_c0_g3	TRINITY_DN12758_c3_g5	TRINITY_DN18774_c7_g3	TRINITY_DN22785_c13_g4	TRINITY_DN23697_c11_g1	TRINITY_DN20747_c3_g2	TRINITY_DN42346_c2_g2	OG0000724	1	1	1	1	1	1	1	1	1	1	OG0000724	TRINITY_DN14905_c0_g3	TRINITY_DN18774_c7_g3	TRINITY_DN42346_c2_g2	TRINITY_DN22785_c13_g4	TRINITY_DN23697_c11_g1	TRINITY_DN12758_c3_g5	TRINITY_DN20747_c3_g2
OG0000725	TRINITY_DN9774_c1_g2	TRINITY_DN23411_c6_g1	TRINITY_DN14978_c4_g1	TRINITY_DN13968_c5_g4, TRINITY_DN20137_c10_g1	TRINITY_DN16248_c4_g1, TRINITY_DN16981_c2_g1	TRINITY_DN21934_c5_g2	TRINITY_DN19063_c3_g1, TRINITY_DN21415_c7_g1	TRINITY_DN19592_c7_g1, TRINITY_DN19592_c7_g3	TRINITY_DN30974_c0_g1, TRINITY_DN42801_c4_g1	OG0000725	1	1	1	2	2	1	2	2	2	0	OG0000725	TRINITY_DN9774_c1_g2	TRINITY_DN23411_c6_g1	TRINITY_DN14978_c4_g1	TRINITY_DN13968_c5_g4	TRINITY_DN16981_c2_g1	TRINITY_DN21934_c5_g2	TRINITY_DN21415_c7_g1	TRINITY_DN19592_c7_g3	TRINITY_DN30974_c0_g1	OG0000725	1	1	1	1	1	1	1	1	1	1	OG0000725	TRINITY_DN14978_c4_g1	TRINITY_DN16981_c2_g1	TRINITY_DN30974_c0_g1	TRINITY_DN21934_c5_g2	TRINITY_DN21415_c7_g1	TRINITY_DN13968_c5_g4	TRINITY_DN19592_c7_g3
OG0000726	TRINITY_DN3954_c2_g1	TRINITY_DN18379_c0_g1, TRINITY_DN18379_c0_g2	TRINITY_DN14_c4_g3	TRINITY_DN12601_c0_g1	TRINITY_DN15818_c0_g1, TRINITY_DN15818_c0_g2	TRINITY_DN20814_c0_g1	TRINITY_DN22675_c0_g1, TRINITY_DN22675_c0_g2	TRINITY_DN17275_c0_g1, TRINITY_DN17275_c0_g2	TRINITY_DN40976_c0_g1, TRINITY_DN41372_c0_g1	OG0000726	1	2	1	1	2	1	2	2	2	0	OG0000726	TRINITY_DN3954_c2_g1	TRINITY_DN18379_c0_g2	TRINITY_DN14_c4_g3	TRINITY_DN12601_c0_g1	TRINITY_DN15818_c0_g2	TRINITY_DN20814_c0_g1	TRINITY_DN22675_c0_g2	TRINITY_DN17275_c0_g2	TRINITY_DN41372_c0_g1	OG0000726	1	1	1	1	1	1	1	1	1	1	OG0000726	TRINITY_DN14_c4_g3	TRINITY_DN15818_c0_g2	TRINITY_DN41372_c0_g1	TRINITY_DN20814_c0_g1	TRINITY_DN22675_c0_g2	TRINITY_DN12601_c0_g1	TRINITY_DN17275_c0_g2
OG0000728	TRINITY_DN91_c0_g1	TRINITY_DN19500_c4_g1, TRINITY_DN23311_c6_g1	TRINITY_DN153_c7_g2, TRINITY_DN17030_c0_g1	TRINITY_DN15327_c2_g3, TRINITY_DN19138_c10_g1	TRINITY_DN18388_c3_g1	TRINITY_DN22363_c2_g1	TRINITY_DN21158_c5_g1, TRINITY_DN21931_c1_g2	TRINITY_DN17869_c8_g1, TRINITY_DN20905_c4_g2	TRINITY_DN46156_c2_g1	OG0000728	1	2	2	2	1	1	2	2	1	0	OG0000728	TRINITY_DN91_c0_g1	TRINITY_DN19500_c4_g1	TRINITY_DN153_c7_g2	TRINITY_DN15327_c2_g3	TRINITY_DN18388_c3_g1	TRINITY_DN22363_c2_g1	TRINITY_DN21931_c1_g2	TRINITY_DN17869_c8_g1	TRINITY_DN46156_c2_g1	OG0000728	1	1	1	1	1	1	1	1	1	1	OG0000728	TRINITY_DN153_c7_g2	TRINITY_DN18388_c3_g1	TRINITY_DN46156_c2_g1	TRINITY_DN22363_c2_g1	TRINITY_DN21931_c1_g2	TRINITY_DN15327_c2_g3	TRINITY_DN17869_c8_g1
OG0000729	TRINITY_DN2310_c0_g1	TRINITY_DN20106_c4_g1	TRINITY_DN1562_c0_g2	TRINITY_DN14881_c12_g1, TRINITY_DN21219_c7_g1	TRINITY_DN17928_c4_g1, TRINITY_DN17928_c4_g2	TRINITY_DN23247_c10_g4, TRINITY_DN23782_c9_g1	TRINITY_DN21533_c3_g1, TRINITY_DN24430_c5_g1	TRINITY_DN20041_c4_g6	TRINITY_DN47099_c0_g2, TRINITY_DN47153_c0_g1	OG0000729	1	1	1	2	2	2	2	1	2	0	OG0000729	TRINITY_DN2310_c0_g1	TRINITY_DN20106_c4_g1	TRINITY_DN1562_c0_g2	TRINITY_DN14881_c12_g1	TRINITY_DN17928_c4_g2	TRINITY_DN23782_c9_g1	TRINITY_DN21533_c3_g1	TRINITY_DN20041_c4_g6	TRINITY_DN47099_c0_g2	OG0000729	1	1	1	1	1	1	1	1	1	1	OG0000729	TRINITY_DN1562_c0_g2	TRINITY_DN17928_c4_g2	TRINITY_DN47099_c0_g2	TRINITY_DN23782_c9_g1	TRINITY_DN21533_c3_g1	TRINITY_DN14881_c12_g1	TRINITY_DN20041_c4_g6
OG0000730	TRINITY_DN5723_c0_g2	TRINITY_DN23508_c1_g1, TRINITY_DN3482_c0_g1	TRINITY_DN15768_c1_g1, TRINITY_DN6816_c0_g1	TRINITY_DN14003_c1_g5	TRINITY_DN16038_c0_g1, TRINITY_DN16038_c1_g1	TRINITY_DN24203_c6_g2	TRINITY_DN17945_c0_g1, TRINITY_DN22808_c8_g1	TRINITY_DN15887_c0_g1, TRINITY_DN38027_c0_g1	TRINITY_DN53310_c0_g1	OG0000730	1	2	2	1	2	1	2	2	1	0	OG0000730	TRINITY_DN5723_c0_g2	TRINITY_DN23508_c1_g1	TRINITY_DN6816_c0_g1	TRINITY_DN14003_c1_g5	TRINITY_DN16038_c1_g1	TRINITY_DN24203_c6_g2	TRINITY_DN17945_c0_g1	TRINITY_DN38027_c0_g1	TRINITY_DN53310_c0_g1	OG0000730	1	1	1	1	1	1	1	1	1	1	OG0000730	TRINITY_DN6816_c0_g1	TRINITY_DN16038_c1_g1	TRINITY_DN53310_c0_g1	TRINITY_DN24203_c6_g2	TRINITY_DN17945_c0_g1	TRINITY_DN14003_c1_g5	TRINITY_DN38027_c0_g1
OG0000731	TRINITY_DN7442_c0_g3, TRINITY_DN7442_c1_g1	TRINITY_DN22264_c7_g1	TRINITY_DN16015_c15_g1	TRINITY_DN11701_c0_g1		TRINITY_DN21618_c9_g2, TRINITY_DN21618_c9_g4	TRINITY_DN20967_c5_g2, TRINITY_DN38172_c0_g1, TRINITY_DN41510_c0_g1	TRINITY_DN23519_c0_g1, TRINITY_DN42292_c0_g1	TRINITY_DN17494_c0_g1, TRINITY_DN60964_c0_g1	OG0000731	2	1	1	1	0	2	3	2	2	0	OG0000731	TRINITY_DN7442_c0_g3	TRINITY_DN22264_c7_g1	TRINITY_DN16015_c15_g1	TRINITY_DN11701_c0_g1		TRINITY_DN21618_c9_g2	TRINITY_DN38172_c0_g1	TRINITY_DN23519_c0_g1	TRINITY_DN60964_c0_g1	OG0000731	1	1	1	1	0	1	1	1	1	0	OG0000731	TRINITY_DN16015_c15_g1	TRINITY_UK00000_c0_g1	TRINITY_DN60964_c0_g1	TRINITY_DN21618_c9_g2	TRINITY_DN38172_c0_g1	TRINITY_DN11701_c0_g1	TRINITY_DN23519_c0_g1
OG0000732	TRINITY_DN117_c0_g1, TRINITY_DN1509_c1_g2	TRINITY_DN20656_c0_g1, TRINITY_DN20656_c9_g1, TRINITY_DN35808_c0_g1	TRINITY_DN1697_c0_g3, TRINITY_DN512_c0_g1	TRINITY_DN21356_c7_g1	TRINITY_DN17078_c5_g1	TRINITY_DN22877_c2_g4	TRINITY_DN21246_c6_g1, TRINITY_DN21796_c6_g1		TRINITY_DN41375_c0_g1, TRINITY_DN46889_c0_g1	OG0000732	2	3	2	1	1	1	2	0	2	0	OG0000732	TRINITY_DN1509_c1_g2	TRINITY_DN20656_c9_g1	TRINITY_DN512_c0_g1	TRINITY_DN21356_c7_g1	TRINITY_DN17078_c5_g1	TRINITY_DN22877_c2_g4	TRINITY_DN21796_c6_g1		TRINITY_DN46889_c0_g1	OG0000732	1	1	1	1	1	1	1	0	1	0	OG0000732	TRINITY_DN512_c0_g1	TRINITY_DN17078_c5_g1	TRINITY_DN46889_c0_g1	TRINITY_DN22877_c2_g4	TRINITY_DN21796_c6_g1	TRINITY_DN21356_c7_g1	TRINITY_UK00000_c0_g1
OG0000733	TRINITY_DN1396_c0_g1	TRINITY_DN20184_c2_g2	TRINITY_DN17029_c2_g2	TRINITY_DN15824_c3_g1, TRINITY_DN16847_c2_g1	TRINITY_DN16710_c0_g1, TRINITY_DN16710_c0_g4	TRINITY_DN17587_c0_g1, TRINITY_DN24701_c6_g1, TRINITY_DN4692_c0_g1	TRINITY_DN23907_c0_g2	TRINITY_DN17403_c0_g1	TRINITY_DN18851_c0_g1, TRINITY_DN43729_c0_g1	OG0000733	1	1	1	2	2	3	1	1	2	0	OG0000733	TRINITY_DN1396_c0_g1	TRINITY_DN20184_c2_g2	TRINITY_DN17029_c2_g2	TRINITY_DN15824_c3_g1	TRINITY_DN16710_c0_g1	TRINITY_DN24701_c6_g1	TRINITY_DN23907_c0_g2	TRINITY_DN17403_c0_g1	TRINITY_DN43729_c0_g1	OG0000733	1	1	1	1	1	1	1	1	1	1	OG0000733	TRINITY_DN17029_c2_g2	TRINITY_DN16710_c0_g1	TRINITY_DN43729_c0_g1	TRINITY_DN24701_c6_g1	TRINITY_DN23907_c0_g2	TRINITY_DN15824_c3_g1	TRINITY_DN17403_c0_g1
OG0000734	TRINITY_DN2463_c0_g1	TRINITY_DN22005_c7_g1	TRINITY_DN17053_c3_g1, TRINITY_DN17053_c7_g1	TRINITY_DN18910_c4_g1	TRINITY_DN18686_c2_g1	TRINITY_DN26237_c0_g1, TRINITY_DN58996_c0_g1	TRINITY_DN41526_c0_g1, TRINITY_DN47170_c0_g1, TRINITY_DN6472_c0_g1	TRINITY_DN13958_c0_g3	TRINITY_DN27089_c0_g1, TRINITY_DN72543_c0_g1	OG0000734	1	1	2	1	1	2	3	1	2	0	OG0000734	TRINITY_DN2463_c0_g1	TRINITY_DN22005_c7_g1	TRINITY_DN17053_c7_g1	TRINITY_DN18910_c4_g1	TRINITY_DN18686_c2_g1	TRINITY_DN58996_c0_g1	TRINITY_DN47170_c0_g1	TRINITY_DN13958_c0_g3	TRINITY_DN72543_c0_g1	OG0000734	1	1	1	1	1	1	1	1	1	1	OG0000734	TRINITY_DN17053_c7_g1	TRINITY_DN18686_c2_g1	TRINITY_DN72543_c0_g1	TRINITY_DN58996_c0_g1	TRINITY_DN47170_c0_g1	TRINITY_DN18910_c4_g1	TRINITY_DN13958_c0_g3
OG0000735	TRINITY_DN1414_c0_g2	TRINITY_DN21469_c2_g3, TRINITY_DN21763_c7_g1	TRINITY_DN172_c7_g1	TRINITY_DN18767_c4_g1, TRINITY_DN18767_c4_g5	TRINITY_DN19620_c5_g1	TRINITY_DN22921_c12_g2, TRINITY_DN22929_c7_g2	TRINITY_DN18338_c9_g3, TRINITY_DN20153_c7_g2, TRINITY_DN21045_c7_g3	TRINITY_DN18190_c4_g3	TRINITY_DN47786_c1_g1	OG0000735	1	2	1	2	1	2	3	1	1	0	OG0000735	TRINITY_DN1414_c0_g2	TRINITY_DN21469_c2_g3	TRINITY_DN172_c7_g1	TRINITY_DN18767_c4_g1	TRINITY_DN19620_c5_g1	TRINITY_DN22921_c12_g2	TRINITY_DN18338_c9_g3	TRINITY_DN18190_c4_g3	TRINITY_DN47786_c1_g1	OG0000735	1	1	1	1	1	1	1	1	1	1	OG0000735	TRINITY_DN172_c7_g1	TRINITY_DN19620_c5_g1	TRINITY_DN47786_c1_g1	TRINITY_DN22921_c12_g2	TRINITY_DN18338_c9_g3	TRINITY_DN18767_c4_g1	TRINITY_DN18190_c4_g3
OG0000736	TRINITY_DN9838_c5_g1	TRINITY_DN22521_c4_g1, TRINITY_DN66574_c0_g1	TRINITY_DN17442_c3_g1, TRINITY_DN54908_c1_g1	TRINITY_DN28292_c0_g1	TRINITY_DN12020_c0_g1, TRINITY_DN12020_c0_g3, TRINITY_DN18399_c2_g1	TRINITY_DN5425_c0_g1	TRINITY_DN41457_c0_g1	TRINITY_DN38987_c0_g1	TRINITY_DN88355_c0_g1, TRINITY_DN9164_c0_g1	OG0000736	1	2	2	1	3	1	1	1	2	0	OG0000736	TRINITY_DN9838_c5_g1	TRINITY_DN22521_c4_g1	TRINITY_DN17442_c3_g1	TRINITY_DN28292_c0_g1	TRINITY_DN12020_c0_g3	TRINITY_DN5425_c0_g1	TRINITY_DN41457_c0_g1	TRINITY_DN38987_c0_g1	TRINITY_DN9164_c0_g1	OG0000736	1	1	1	1	1	1	1	1	1	1	OG0000736	TRINITY_DN17442_c3_g1	TRINITY_DN12020_c0_g3	TRINITY_DN9164_c0_g1	TRINITY_DN5425_c0_g1	TRINITY_DN41457_c0_g1	TRINITY_DN28292_c0_g1	TRINITY_DN38987_c0_g1
OG0000737	TRINITY_DN1567_c1_g1	TRINITY_DN21821_c9_g1, TRINITY_DN21821_c9_g2	TRINITY_DN176_c7_g1	TRINITY_DN19555_c3_g1	TRINITY_DN19336_c4_g6, TRINITY_DN19497_c4_g1	TRINITY_DN21769_c6_g1, TRINITY_DN21769_c6_g2, TRINITY_DN21769_c6_g4	TRINITY_DN22246_c7_g3	TRINITY_DN20176_c4_g2	TRINITY_DN44984_c7_g1, TRINITY_DN46693_c3_g1	OG0000737	1	2	1	1	2	3	1	1	2	0	OG0000737	TRINITY_DN1567_c1_g1	TRINITY_DN21821_c9_g2	TRINITY_DN176_c7_g1	TRINITY_DN19555_c3_g1	TRINITY_DN19497_c4_g1	TRINITY_DN21769_c6_g4	TRINITY_DN22246_c7_g3	TRINITY_DN20176_c4_g2	TRINITY_DN44984_c7_g1	OG0000737	1	1	1	1	1	1	1	1	1	1	OG0000737	TRINITY_DN176_c7_g1	TRINITY_DN19497_c4_g1	TRINITY_DN44984_c7_g1	TRINITY_DN21769_c6_g4	TRINITY_DN22246_c7_g3	TRINITY_DN19555_c3_g1	TRINITY_DN20176_c4_g2
OG0000738	TRINITY_DN7186_c0_g1	TRINITY_DN13775_c0_g1, TRINITY_DN22527_c12_g1, TRINITY_DN62542_c0_g1	TRINITY_DN1830_c3_g2	TRINITY_DN20857_c4_g1	TRINITY_DN1907_c0_g1, TRINITY_DN19115_c2_g1, TRINITY_DN19115_c2_g2	TRINITY_DN21815_c6_g5	TRINITY_DN24419_c3_g1	TRINITY_DN19926_c3_g2, TRINITY_DN38635_c0_g1	TRINITY_DN43977_c0_g1	OG0000738	1	3	1	1	3	1	1	2	1	0	OG0000738	TRINITY_DN7186_c0_g1	TRINITY_DN22527_c12_g1	TRINITY_DN1830_c3_g2	TRINITY_DN20857_c4_g1	TRINITY_DN19115_c2_g2	TRINITY_DN21815_c6_g5	TRINITY_DN24419_c3_g1	TRINITY_DN19926_c3_g2	TRINITY_DN43977_c0_g1	OG0000738	1	1	1	1	1	1	1	1	1	1	OG0000738	TRINITY_DN1830_c3_g2	TRINITY_DN19115_c2_g2	TRINITY_DN43977_c0_g1	TRINITY_DN21815_c6_g5	TRINITY_DN24419_c3_g1	TRINITY_DN20857_c4_g1	TRINITY_DN19926_c3_g2
OG0000739	TRINITY_DN1724_c0_g1	TRINITY_DN23062_c0_g2	TRINITY_DN184_c0_g1	TRINITY_DN17541_c3_g2, TRINITY_DN19768_c3_g5	TRINITY_DN19324_c2_g2, TRINITY_DN19324_c2_g7	TRINITY_DN22638_c1_g3	TRINITY_DN23587_c7_g4, TRINITY_DN24459_c1_g2, TRINITY_DN30558_c0_g1	TRINITY_DN17277_c0_g2, TRINITY_DN17277_c0_g3	TRINITY_DN47729_c0_g1	OG0000739	1	1	1	2	2	1	3	2	1	0	OG0000739	TRINITY_DN1724_c0_g1	TRINITY_DN23062_c0_g2	TRINITY_DN184_c0_g1	TRINITY_DN17541_c3_g2	TRINITY_DN19324_c2_g2	TRINITY_DN22638_c1_g3	TRINITY_DN23587_c7_g4	TRINITY_DN17277_c0_g2	TRINITY_DN47729_c0_g1	OG0000739	1	1	1	1	1	1	1	1	1	1	OG0000739	TRINITY_DN184_c0_g1	TRINITY_DN19324_c2_g2	TRINITY_DN47729_c0_g1	TRINITY_DN22638_c1_g3	TRINITY_DN23587_c7_g4	TRINITY_DN17541_c3_g2	TRINITY_DN17277_c0_g2
OG0000740	TRINITY_DN2024_c0_g2	TRINITY_DN22683_c7_g2	TRINITY_DN18_c3_g2	TRINITY_DN19495_c2_g3, TRINITY_DN20389_c1_g1	TRINITY_DN18749_c2_g2	TRINITY_DN24717_c1_g1	TRINITY_DN25036_c0_g1, TRINITY_DN25206_c1_g1	TRINITY_DN18904_c9_g1, TRINITY_DN21290_c9_g1, TRINITY_DN21290_c9_g2	TRINITY_DN39135_c0_g1, TRINITY_DN48975_c5_g2	OG0000740	1	1	1	2	1	1	2	3	2	0	OG0000740	TRINITY_DN2024_c0_g2	TRINITY_DN22683_c7_g2	TRINITY_DN18_c3_g2	TRINITY_DN19495_c2_g3	TRINITY_DN18749_c2_g2	TRINITY_DN24717_c1_g1	TRINITY_DN25036_c0_g1	TRINITY_DN21290_c9_g1	TRINITY_DN39135_c0_g1	OG0000740	1	1	1	1	1	1	1	1	1	1	OG0000740	TRINITY_DN18_c3_g2	TRINITY_DN18749_c2_g2	TRINITY_DN39135_c0_g1	TRINITY_DN24717_c1_g1	TRINITY_DN25036_c0_g1	TRINITY_DN19495_c2_g3	TRINITY_DN21290_c9_g1
OG0000741	TRINITY_DN3791_c1_g1	TRINITY_DN23380_c3_g1	TRINITY_DN197_c2_g1, TRINITY_DN197_c3_g1	TRINITY_DN20744_c10_g1	TRINITY_DN17159_c8_g1, TRINITY_DN17159_c8_g2, TRINITY_DN17159_c8_g3	TRINITY_DN23533_c4_g1	TRINITY_DN23685_c5_g1	TRINITY_DN14051_c0_g1	TRINITY_DN22711_c0_g1, TRINITY_DN36485_c0_g1, TRINITY_DN41204_c0_g1	OG0000741	1	1	2	1	3	1	1	1	3	0	OG0000741	TRINITY_DN3791_c1_g1	TRINITY_DN23380_c3_g1	TRINITY_DN197_c3_g1	TRINITY_DN20744_c10_g1	TRINITY_DN17159_c8_g1	TRINITY_DN23533_c4_g1	TRINITY_DN23685_c5_g1	TRINITY_DN14051_c0_g1	TRINITY_DN41204_c0_g1	OG0000741	1	1	1	1	1	1	1	1	1	1	OG0000741	TRINITY_DN197_c3_g1	TRINITY_DN17159_c8_g1	TRINITY_DN41204_c0_g1	TRINITY_DN23533_c4_g1	TRINITY_DN23685_c5_g1	TRINITY_DN20744_c10_g1	TRINITY_DN14051_c0_g1
OG0000742	TRINITY_DN1023_c0_g1	TRINITY_DN20629_c3_g1	TRINITY_DN20345_c3_g1, TRINITY_DN20345_c4_g1	TRINITY_DN14841_c7_g1, TRINITY_DN19042_c1_g1	TRINITY_DN16721_c11_g1, TRINITY_DN19787_c6_g1	TRINITY_DN21598_c5_g1, TRINITY_DN21598_c5_g2	TRINITY_DN19224_c4_g1	TRINITY_DN15081_c0_g1, TRINITY_DN15768_c0_g1	TRINITY_DN70310_c0_g1	OG0000742	1	1	2	2	2	2	1	2	1	0	OG0000742	TRINITY_DN1023_c0_g1	TRINITY_DN20629_c3_g1	TRINITY_DN20345_c3_g1	TRINITY_DN19042_c1_g1	TRINITY_DN19787_c6_g1	TRINITY_DN21598_c5_g2	TRINITY_DN19224_c4_g1	TRINITY_DN15768_c0_g1	TRINITY_DN70310_c0_g1	OG0000742	1	1	1	1	1	1	1	1	1	1	OG0000742	TRINITY_DN20345_c3_g1	TRINITY_DN19787_c6_g1	TRINITY_DN70310_c0_g1	TRINITY_DN21598_c5_g2	TRINITY_DN19224_c4_g1	TRINITY_DN19042_c1_g1	TRINITY_DN15768_c0_g1
OG0000743	TRINITY_DN917_c2_g2	TRINITY_DN19933_c8_g1	TRINITY_DN206_c4_g1	TRINITY_DN17799_c8_g4, TRINITY_DN17799_c8_g8	TRINITY_DN18329_c7_g1, TRINITY_DN18329_c7_g4, TRINITY_DN19789_c3_g2	TRINITY_DN23376_c13_g1	TRINITY_DN20306_c7_g2	TRINITY_DN19520_c5_g10, TRINITY_DN20391_c9_g1, TRINITY_DN20391_c9_g9	TRINITY_DN46282_c0_g1	OG0000743	1	1	1	2	3	1	1	3	1	0	OG0000743	TRINITY_DN917_c2_g2	TRINITY_DN19933_c8_g1	TRINITY_DN206_c4_g1	TRINITY_DN17799_c8_g4	TRINITY_DN18329_c7_g1	TRINITY_DN23376_c13_g1	TRINITY_DN20306_c7_g2	TRINITY_DN19520_c5_g10	TRINITY_DN46282_c0_g1	OG0000743	1	1	1	1	1	1	1	1	1	1	OG0000743	TRINITY_DN206_c4_g1	TRINITY_DN18329_c7_g1	TRINITY_DN46282_c0_g1	TRINITY_DN23376_c13_g1	TRINITY_DN20306_c7_g2	TRINITY_DN17799_c8_g4	TRINITY_DN19520_c5_g10
OG0000744			TRINITY_DN20896_c2_g1, TRINITY_DN6542_c0_g1	TRINITY_DN12615_c9_g4, TRINITY_DN15145_c10_g1, TRINITY_DN16966_c1_g4	TRINITY_DN16214_c2_g1, TRINITY_DN19016_c8_g1	TRINITY_DN1341_c0_g1	TRINITY_DN23014_c1_g4, TRINITY_DN23055_c2_g1, TRINITY_DN24660_c2_g2	TRINITY_DN27888_c0_g1	TRINITY_DN17527_c0_g2, TRINITY_DN38391_c0_g1	OG0000744	0	0	2	3	2	1	3	1	2	0	OG0000744			TRINITY_DN20896_c2_g1	TRINITY_DN15145_c10_g1	TRINITY_DN19016_c8_g1	TRINITY_DN1341_c0_g1	TRINITY_DN23014_c1_g4	TRINITY_DN27888_c0_g1	TRINITY_DN38391_c0_g1	OG0000744	0	0	1	1	1	1	1	1	1	0	OG0000744	TRINITY_DN20896_c2_g1	TRINITY_DN19016_c8_g1	TRINITY_DN38391_c0_g1	TRINITY_DN1341_c0_g1	TRINITY_DN23014_c1_g4	TRINITY_DN15145_c10_g1	TRINITY_DN27888_c0_g1
OG0000745	TRINITY_DN188_c0_g2, TRINITY_DN4648_c0_g1		TRINITY_DN213_c2_g1	TRINITY_DN14563_c1_g1	TRINITY_DN17177_c8_g2, TRINITY_DN17177_c8_g4	TRINITY_DN22566_c3_g1	TRINITY_DN21933_c0_g3, TRINITY_DN21933_c0_g4	TRINITY_DN20457_c10_g3, TRINITY_DN20457_c10_g4	TRINITY_DN41679_c5_g3, TRINITY_DN42072_c0_g1, TRINITY_DN43436_c5_g2	OG0000745	2	0	1	1	2	1	2	2	3	0	OG0000745	TRINITY_DN4648_c0_g1		TRINITY_DN213_c2_g1	TRINITY_DN14563_c1_g1	TRINITY_DN17177_c8_g2	TRINITY_DN22566_c3_g1	TRINITY_DN21933_c0_g3	TRINITY_DN20457_c10_g4	TRINITY_DN43436_c5_g2	OG0000745	1	0	1	1	1	1	1	1	1	0	OG0000745	TRINITY_DN213_c2_g1	TRINITY_DN17177_c8_g2	TRINITY_DN43436_c5_g2	TRINITY_DN22566_c3_g1	TRINITY_DN21933_c0_g3	TRINITY_DN14563_c1_g1	TRINITY_DN20457_c10_g4
OG0000747	TRINITY_DN918_c17_g1, TRINITY_DN918_c19_g1	TRINITY_DN30353_c0_g1, TRINITY_DN54776_c0_g1	TRINITY_DN21893_c0_g1, TRINITY_DN21893_c6_g1		TRINITY_DN2157_c0_g1	TRINITY_DN11678_c0_g1	TRINITY_DN7912_c0_g1	TRINITY_DN21851_c0_g1, TRINITY_DN44942_c0_g1	TRINITY_DN21890_c0_g1, TRINITY_DN28660_c0_g1, TRINITY_DN28660_c0_g2	OG0000747	2	2	2	0	1	1	1	2	3	0	OG0000747	TRINITY_DN918_c17_g1	TRINITY_DN54776_c0_g1	TRINITY_DN21893_c0_g1		TRINITY_DN2157_c0_g1	TRINITY_DN11678_c0_g1	TRINITY_DN7912_c0_g1	TRINITY_DN21851_c0_g1	TRINITY_DN21890_c0_g1	OG0000747	1	1	1	0	1	1	1	1	1	0	OG0000747	TRINITY_DN21893_c0_g1	TRINITY_DN2157_c0_g1	TRINITY_DN21890_c0_g1	TRINITY_DN11678_c0_g1	TRINITY_DN7912_c0_g1	TRINITY_UK00000_c0_g1	TRINITY_DN21851_c0_g1
OG0000748		TRINITY_DN22345_c6_g1, TRINITY_DN22345_c6_g2	TRINITY_DN21932_c2_g3, TRINITY_DN6943_c7_g1	TRINITY_DN20818_c7_g1, TRINITY_DN20818_c7_g2	TRINITY_DN17802_c4_g11, TRINITY_DN17802_c4_g4, TRINITY_DN17802_c4_g9		TRINITY_DN20397_c3_g2	TRINITY_DN14930_c0_g2, TRINITY_DN20831_c2_g3, TRINITY_DN20831_c2_g6	TRINITY_DN45143_c6_g1	OG0000748	0	2	2	2	3	0	1	3	1	0	OG0000748		TRINITY_DN22345_c6_g2	TRINITY_DN21932_c2_g3	TRINITY_DN20818_c7_g1	TRINITY_DN17802_c4_g4		TRINITY_DN20397_c3_g2	TRINITY_DN20831_c2_g6	TRINITY_DN45143_c6_g1	OG0000748	0	1	1	1	1	0	1	1	1	0	OG0000748	TRINITY_DN21932_c2_g3	TRINITY_DN17802_c4_g4	TRINITY_DN45143_c6_g1	TRINITY_UK00000_c0_g1	TRINITY_DN20397_c3_g2	TRINITY_DN20818_c7_g1	TRINITY_DN20831_c2_g6
OG0000751		TRINITY_DN43562_c0_g1, TRINITY_DN44559_c0_g1	TRINITY_DN23260_c0_g1, TRINITY_DN23260_c11_g1, TRINITY_DN23260_c14_g1	TRINITY_DN16255_c0_g4	TRINITY_DN16250_c0_g1	TRINITY_DN57682_c0_g1	TRINITY_DN11967_c0_g2, TRINITY_DN36899_c0_g1, TRINITY_DN49107_c0_g1	TRINITY_DN11999_c0_g1	TRINITY_DN49250_c0_g1, TRINITY_DN75881_c0_g1	OG0000751	0	2	3	1	1	1	3	1	2	0	OG0000751		TRINITY_DN44559_c0_g1	TRINITY_DN23260_c0_g1	TRINITY_DN16255_c0_g4	TRINITY_DN16250_c0_g1	TRINITY_DN57682_c0_g1	TRINITY_DN11967_c0_g2	TRINITY_DN11999_c0_g1	TRINITY_DN75881_c0_g1	OG0000751	0	1	1	1	1	1	1	1	1	0	OG0000751	TRINITY_DN23260_c0_g1	TRINITY_DN16250_c0_g1	TRINITY_DN75881_c0_g1	TRINITY_DN57682_c0_g1	TRINITY_DN11967_c0_g2	TRINITY_DN16255_c0_g4	TRINITY_DN11999_c0_g1
OG0000752	TRINITY_DN13673_c0_g1, TRINITY_DN1565_c0_g1, TRINITY_DN62116_c0_g1	TRINITY_DN17778_c0_g1, TRINITY_DN19673_c5_g4, TRINITY_DN59435_c0_g1	TRINITY_DN232_c0_g2	TRINITY_DN19234_c9_g1	TRINITY_DN19009_c5_g4	TRINITY_DN24588_c5_g1, TRINITY_DN24588_c5_g5	TRINITY_DN23494_c5_g2	TRINITY_DN18654_c5_g1	TRINITY_DN48702_c0_g3	OG0000752	3	3	1	1	1	2	1	1	1	0	OG0000752	TRINITY_DN1565_c0_g1	TRINITY_DN19673_c5_g4	TRINITY_DN232_c0_g2	TRINITY_DN19234_c9_g1	TRINITY_DN19009_c5_g4	TRINITY_DN24588_c5_g1	TRINITY_DN23494_c5_g2	TRINITY_DN18654_c5_g1	TRINITY_DN48702_c0_g3	OG0000752	1	1	1	1	1	1	1	1	1	1	OG0000752	TRINITY_DN232_c0_g2	TRINITY_DN19009_c5_g4	TRINITY_DN48702_c0_g3	TRINITY_DN24588_c5_g1	TRINITY_DN23494_c5_g2	TRINITY_DN19234_c9_g1	TRINITY_DN18654_c5_g1
OG0000753	TRINITY_DN21428_c4_g1	TRINITY_DN21434_c2_g2	TRINITY_DN24627_c14_g1, TRINITY_DN24627_c15_g1	TRINITY_DN13442_c3_g2	TRINITY_DN16948_c2_g1, TRINITY_DN19660_c2_g1	TRINITY_DN47201_c0_g1, TRINITY_DN5190_c0_g1	TRINITY_DN1816_c0_g1	TRINITY_DN10175_c0_g1	TRINITY_DN25205_c0_g1, TRINITY_DN85177_c0_g1, TRINITY_DN95397_c0_g1	OG0000753	1	1	2	1	2	2	1	1	3	0	OG0000753	TRINITY_DN21428_c4_g1	TRINITY_DN21434_c2_g2	TRINITY_DN24627_c15_g1	TRINITY_DN13442_c3_g2	TRINITY_DN19660_c2_g1	TRINITY_DN47201_c0_g1	TRINITY_DN1816_c0_g1	TRINITY_DN10175_c0_g1	TRINITY_DN25205_c0_g1	OG0000753	1	1	1	1	1	1	1	1	1	1	OG0000753	TRINITY_DN24627_c15_g1	TRINITY_DN19660_c2_g1	TRINITY_DN25205_c0_g1	TRINITY_DN47201_c0_g1	TRINITY_DN1816_c0_g1	TRINITY_DN13442_c3_g2	TRINITY_DN10175_c0_g1
OG0000755		TRINITY_DN17732_c0_g1	TRINITY_DN24991_c0_g1, TRINITY_DN24991_c8_g1	TRINITY_DN22753_c0_g1, TRINITY_DN32336_c0_g1, TRINITY_DN8234_c0_g2	TRINITY_DN17356_c6_g2	TRINITY_DN37998_c0_g1	TRINITY_DN3000_c0_g1, TRINITY_DN41796_c0_g1	TRINITY_DN44217_c0_g1	TRINITY_DN62379_c0_g1, TRINITY_DN72375_c0_g1, TRINITY_DN8917_c0_g1	OG0000755	0	1	2	3	1	1	2	1	3	0	OG0000755		TRINITY_DN17732_c0_g1	TRINITY_DN24991_c0_g1	TRINITY_DN8234_c0_g2	TRINITY_DN17356_c6_g2	TRINITY_DN37998_c0_g1	TRINITY_DN41796_c0_g1	TRINITY_DN44217_c0_g1	TRINITY_DN72375_c0_g1	OG0000755	0	1	1	1	1	1	1	1	1	0	OG0000755	TRINITY_DN24991_c0_g1	TRINITY_DN17356_c6_g2	TRINITY_DN72375_c0_g1	TRINITY_DN37998_c0_g1	TRINITY_DN41796_c0_g1	TRINITY_DN8234_c0_g2	TRINITY_DN44217_c0_g1
OG0000756	TRINITY_DN19695_c0_g1	TRINITY_DN18866_c5_g1, TRINITY_DN21790_c7_g1	TRINITY_DN25010_c1_g1	TRINITY_DN11098_c0_g4, TRINITY_DN13522_c3_g5	TRINITY_DN15438_c0_g1, TRINITY_DN17303_c1_g1	TRINITY_DN29115_c0_g1	TRINITY_DN20380_c2_g3	TRINITY_DN18271_c6_g1, TRINITY_DN19771_c0_g1	TRINITY_DN32263_c0_g1, TRINITY_DN47078_c1_g1	OG0000756	1	2	1	2	2	1	1	2	2	0	OG0000756	TRINITY_DN19695_c0_g1	TRINITY_DN21790_c7_g1	TRINITY_DN25010_c1_g1	TRINITY_DN13522_c3_g5	TRINITY_DN17303_c1_g1	TRINITY_DN29115_c0_g1	TRINITY_DN20380_c2_g3	TRINITY_DN18271_c6_g1	TRINITY_DN47078_c1_g1	OG0000756	1	1	1	1	1	1	1	1	1	1	OG0000756	TRINITY_DN25010_c1_g1	TRINITY_DN17303_c1_g1	TRINITY_DN47078_c1_g1	TRINITY_DN29115_c0_g1	TRINITY_DN20380_c2_g3	TRINITY_DN13522_c3_g5	TRINITY_DN18271_c6_g1
OG0000757	TRINITY_DN2364_c15_g1, TRINITY_DN3063_c0_g2	TRINITY_DN22327_c5_g1, TRINITY_DN22799_c5_g2	TRINITY_DN251_c1_g2	TRINITY_DN14920_c10_g1	TRINITY_DN19269_c5_g1	TRINITY_DN22608_c7_g3, TRINITY_DN24890_c11_g1	TRINITY_DN24236_c6_g1, TRINITY_DN25197_c5_g1	TRINITY_DN18527_c7_g3, TRINITY_DN19524_c7_g1	TRINITY_DN45969_c3_g1	OG0000757	2	2	1	1	1	2	2	2	1	0	OG0000757	TRINITY_DN2364_c15_g1	TRINITY_DN22327_c5_g1	TRINITY_DN251_c1_g2	TRINITY_DN14920_c10_g1	TRINITY_DN19269_c5_g1	TRINITY_DN22608_c7_g3	TRINITY_DN25197_c5_g1	TRINITY_DN18527_c7_g3	TRINITY_DN45969_c3_g1	OG0000757	1	1	1	1	1	1	1	1	1	1	OG0000757	TRINITY_DN251_c1_g2	TRINITY_DN19269_c5_g1	TRINITY_DN45969_c3_g1	TRINITY_DN22608_c7_g3	TRINITY_DN25197_c5_g1	TRINITY_DN14920_c10_g1	TRINITY_DN18527_c7_g3
OG0000759	TRINITY_DN1438_c1_g3, TRINITY_DN411_c1_g1	TRINITY_DN19740_c6_g8, TRINITY_DN23518_c8_g1, TRINITY_DN59957_c0_g1	TRINITY_DN2660_c0_g1, TRINITY_DN3196_c0_g2	TRINITY_DN19744_c8_g1	TRINITY_DN16629_c7_g2	TRINITY_DN21298_c6_g2		TRINITY_DN17383_c0_g1, TRINITY_DN20323_c0_g2	TRINITY_DN43350_c3_g4, TRINITY_DN47119_c2_g1	OG0000759	2	3	2	1	1	1	0	2	2	0	OG0000759	TRINITY_DN1438_c1_g3	TRINITY_DN19740_c6_g8	TRINITY_DN3196_c0_g2	TRINITY_DN19744_c8_g1	TRINITY_DN16629_c7_g2	TRINITY_DN21298_c6_g2		TRINITY_DN17383_c0_g1	TRINITY_DN47119_c2_g1	OG0000759	1	1	1	1	1	1	0	1	1	0	OG0000759	TRINITY_DN3196_c0_g2	TRINITY_DN16629_c7_g2	TRINITY_DN47119_c2_g1	TRINITY_DN21298_c6_g2	TRINITY_UK00000_c0_g1	TRINITY_DN19744_c8_g1	TRINITY_DN17383_c0_g1
OG0000760	TRINITY_DN42217_c0_g1	TRINITY_DN21800_c6_g1	TRINITY_DN27636_c1_g1, TRINITY_DN27636_c3_g1	TRINITY_DN304_c0_g1	TRINITY_DN23200_c0_g1, TRINITY_DN24003_c0_g1	TRINITY_DN23552_c6_g4, TRINITY_DN35540_c0_g1	TRINITY_DN18718_c1_g1	TRINITY_DN43544_c0_g1	TRINITY_DN22705_c0_g1, TRINITY_DN79176_c0_g1, TRINITY_DN91372_c0_g1	OG0000760	1	1	2	1	2	2	1	1	3	0	OG0000760	TRINITY_DN42217_c0_g1	TRINITY_DN21800_c6_g1	TRINITY_DN27636_c3_g1	TRINITY_DN304_c0_g1	TRINITY_DN24003_c0_g1	TRINITY_DN35540_c0_g1	TRINITY_DN18718_c1_g1	TRINITY_DN43544_c0_g1	TRINITY_DN79176_c0_g1	OG0000760	1	1	1	1	1	1	1	1	1	1	OG0000760	TRINITY_DN27636_c3_g1	TRINITY_DN24003_c0_g1	TRINITY_DN79176_c0_g1	TRINITY_DN35540_c0_g1	TRINITY_DN18718_c1_g1	TRINITY_DN304_c0_g1	TRINITY_DN43544_c0_g1
OG0000761	TRINITY_DN14026_c1_g1	TRINITY_DN19766_c8_g2, TRINITY_DN20067_c5_g3	TRINITY_DN27693_c0_g1	TRINITY_DN20823_c2_g1	TRINITY_DN11766_c0_g1, TRINITY_DN11766_c0_g2, TRINITY_DN17545_c0_g2	TRINITY_DN22878_c11_g1, TRINITY_DN22969_c11_g1, TRINITY_DN38502_c0_g1	TRINITY_DN22243_c6_g3	TRINITY_DN17889_c7_g1	TRINITY_DN44571_c1_g2	OG0000761	1	2	1	1	3	3	1	1	1	0	OG0000761	TRINITY_DN14026_c1_g1	TRINITY_DN19766_c8_g2	TRINITY_DN27693_c0_g1	TRINITY_DN20823_c2_g1	TRINITY_DN17545_c0_g2	TRINITY_DN22969_c11_g1	TRINITY_DN22243_c6_g3	TRINITY_DN17889_c7_g1	TRINITY_DN44571_c1_g2	OG0000761	1	1	1	1	1	1	1	1	1	1	OG0000761	TRINITY_DN27693_c0_g1	TRINITY_DN17545_c0_g2	TRINITY_DN44571_c1_g2	TRINITY_DN22969_c11_g1	TRINITY_DN22243_c6_g3	TRINITY_DN20823_c2_g1	TRINITY_DN17889_c7_g1
OG0000764	TRINITY_DN11500_c0_g1, TRINITY_DN11500_c2_g1	TRINITY_DN21192_c2_g2, TRINITY_DN23891_c6_g2	TRINITY_DN27869_c0_g1, TRINITY_DN27869_c2_g1	TRINITY_DN17005_c5_g3	TRINITY_DN15269_c0_g1, TRINITY_DN15269_c0_g2	TRINITY_DN19515_c0_g2	TRINITY_DN22479_c1_g3, TRINITY_DN24750_c3_g1	TRINITY_DN19010_c7_g1	TRINITY_DN43683_c5_g1	OG0000764	2	2	2	1	2	1	2	1	1	0	OG0000764	TRINITY_DN11500_c0_g1	TRINITY_DN23891_c6_g2	TRINITY_DN27869_c0_g1	TRINITY_DN17005_c5_g3	TRINITY_DN15269_c0_g2	TRINITY_DN19515_c0_g2	TRINITY_DN22479_c1_g3	TRINITY_DN19010_c7_g1	TRINITY_DN43683_c5_g1	OG0000764	1	1	1	1	1	1	1	1	1	1	OG0000764	TRINITY_DN27869_c0_g1	TRINITY_DN15269_c0_g2	TRINITY_DN43683_c5_g1	TRINITY_DN19515_c0_g2	TRINITY_DN22479_c1_g3	TRINITY_DN17005_c5_g3	TRINITY_DN19010_c7_g1
OG0000765	TRINITY_DN30303_c2_g1, TRINITY_DN30303_c3_g1	TRINITY_DN19357_c0_g1	TRINITY_DN29252_c1_g1, TRINITY_DN29252_c5_g1	TRINITY_DN12241_c0_g1	TRINITY_DN15904_c0_g1	TRINITY_DN20338_c0_g1, TRINITY_DN20338_c0_g3		TRINITY_DN17028_c0_g1, TRINITY_DN17028_c0_g2, TRINITY_DN20755_c2_g1	TRINITY_DN39755_c0_g1, TRINITY_DN80887_c0_g1	OG0000765	2	1	2	1	1	2	0	3	2	0	OG0000765	TRINITY_DN30303_c2_g1	TRINITY_DN19357_c0_g1	TRINITY_DN29252_c5_g1	TRINITY_DN12241_c0_g1	TRINITY_DN15904_c0_g1	TRINITY_DN20338_c0_g1		TRINITY_DN17028_c0_g2	TRINITY_DN80887_c0_g1	OG0000765	1	1	1	1	1	1	0	1	1	0	OG0000765	TRINITY_DN29252_c5_g1	TRINITY_DN15904_c0_g1	TRINITY_DN80887_c0_g1	TRINITY_DN20338_c0_g1	TRINITY_UK00000_c0_g1	TRINITY_DN12241_c0_g1	TRINITY_DN17028_c0_g2
OG0000766	TRINITY_DN3582_c0_g2	TRINITY_DN19239_c4_g1	TRINITY_DN2960_c0_g1, TRINITY_DN2960_c1_g1	TRINITY_DN16675_c0_g1, TRINITY_DN16675_c0_g2	TRINITY_DN17074_c2_g2	TRINITY_DN21786_c5_g3	TRINITY_DN19756_c5_g1, TRINITY_DN19756_c5_g2	TRINITY_DN18449_c0_g2, TRINITY_DN18449_c0_g3	TRINITY_DN11119_c0_g1, TRINITY_DN45580_c8_g1	OG0000766	1	1	2	2	1	1	2	2	2	0	OG0000766	TRINITY_DN3582_c0_g2	TRINITY_DN19239_c4_g1	TRINITY_DN2960_c1_g1	TRINITY_DN16675_c0_g2	TRINITY_DN17074_c2_g2	TRINITY_DN21786_c5_g3	TRINITY_DN19756_c5_g1	TRINITY_DN18449_c0_g3	TRINITY_DN45580_c8_g1	OG0000766	1	1	1	1	1	1	1	1	1	1	OG0000766	TRINITY_DN2960_c1_g1	TRINITY_DN17074_c2_g2	TRINITY_DN45580_c8_g1	TRINITY_DN21786_c5_g3	TRINITY_DN19756_c5_g1	TRINITY_DN16675_c0_g2	TRINITY_DN18449_c0_g3
OG0000768	TRINITY_DN1050_c4_g2, TRINITY_DN33598_c2_g1	TRINITY_DN20573_c10_g10	TRINITY_DN29_c7_g1	TRINITY_DN15885_c0_g1, TRINITY_DN18673_c6_g1	TRINITY_DN18473_c4_g1, TRINITY_DN18473_c4_g5	TRINITY_DN23354_c4_g2, TRINITY_DN23523_c4_g1	TRINITY_DN22626_c6_g7, TRINITY_DN24311_c7_g1	TRINITY_DN20634_c2_g1	TRINITY_DN48437_c12_g1	OG0000768	2	1	1	2	2	2	2	1	1	0	OG0000768	TRINITY_DN1050_c4_g2	TRINITY_DN20573_c10_g10	TRINITY_DN29_c7_g1	TRINITY_DN18673_c6_g1	TRINITY_DN18473_c4_g5	TRINITY_DN23523_c4_g1	TRINITY_DN22626_c6_g7	TRINITY_DN20634_c2_g1	TRINITY_DN48437_c12_g1	OG0000768	1	1	1	1	1	1	1	1	1	1	OG0000768	TRINITY_DN29_c7_g1	TRINITY_DN18473_c4_g5	TRINITY_DN48437_c12_g1	TRINITY_DN23523_c4_g1	TRINITY_DN22626_c6_g7	TRINITY_DN18673_c6_g1	TRINITY_DN20634_c2_g1
OG0000769	TRINITY_DN2744_c1_g2	TRINITY_DN23520_c7_g1	TRINITY_DN327_c6_g1, TRINITY_DN327_c6_g3	TRINITY_DN13601_c6_g1	TRINITY_DN17354_c3_g1	TRINITY_DN22471_c3_g3, TRINITY_DN23014_c3_g2	TRINITY_DN21471_c2_g1, TRINITY_DN22012_c5_g1	TRINITY_DN18746_c6_g1, TRINITY_DN19796_c5_g2	TRINITY_DN46038_c2_g1, TRINITY_DN47504_c4_g1	OG0000769	1	1	2	1	1	2	2	2	2	0	OG0000769	TRINITY_DN2744_c1_g2	TRINITY_DN23520_c7_g1	TRINITY_DN327_c6_g3	TRINITY_DN13601_c6_g1	TRINITY_DN17354_c3_g1	TRINITY_DN23014_c3_g2	TRINITY_DN22012_c5_g1	TRINITY_DN18746_c6_g1	TRINITY_DN46038_c2_g1	OG0000769	1	1	1	1	1	1	1	1	1	1	OG0000769	TRINITY_DN327_c6_g3	TRINITY_DN17354_c3_g1	TRINITY_DN46038_c2_g1	TRINITY_DN23014_c3_g2	TRINITY_DN22012_c5_g1	TRINITY_DN13601_c6_g1	TRINITY_DN18746_c6_g1
OG0000770	TRINITY_DN2531_c1_g3	TRINITY_DN18263_c3_g2	TRINITY_DN33464_c1_g1, TRINITY_DN33464_c3_g1	TRINITY_DN15681_c3_g2	TRINITY_DN17415_c3_g2	TRINITY_DN17228_c0_g1, TRINITY_DN43343_c0_g1	TRINITY_DN10950_c0_g1, TRINITY_DN2776_c0_g1, TRINITY_DN2776_c0_g2	TRINITY_DN658_c0_g1	TRINITY_DN59505_c0_g1, TRINITY_DN7037_c0_g1	OG0000770	1	1	2	1	1	2	3	1	2	0	OG0000770	TRINITY_DN2531_c1_g3	TRINITY_DN18263_c3_g2	TRINITY_DN33464_c1_g1	TRINITY_DN15681_c3_g2	TRINITY_DN17415_c3_g2	TRINITY_DN43343_c0_g1	TRINITY_DN2776_c0_g2	TRINITY_DN658_c0_g1	TRINITY_DN59505_c0_g1	OG0000770	1	1	1	1	1	1	1	1	1	1	OG0000770	TRINITY_DN33464_c1_g1	TRINITY_DN17415_c3_g2	TRINITY_DN59505_c0_g1	TRINITY_DN43343_c0_g1	TRINITY_DN2776_c0_g2	TRINITY_DN15681_c3_g2	TRINITY_DN658_c0_g1
OG0000772	TRINITY_DN9645_c0_g2	TRINITY_DN18371_c4_g1, TRINITY_DN23577_c4_g1	TRINITY_DN3461_c11_g1	TRINITY_DN12004_c0_g1, TRINITY_DN16857_c4_g1	TRINITY_DN16606_c4_g3	TRINITY_DN2873_c0_g1	TRINITY_DN4070_c0_g1	TRINITY_DN24393_c0_g1, TRINITY_DN36799_c0_g1	TRINITY_DN28328_c0_g1, TRINITY_DN81384_c0_g1, TRINITY_DN95908_c0_g1	OG0000772	1	2	1	2	1	1	1	2	3	0	OG0000772	TRINITY_DN9645_c0_g2	TRINITY_DN23577_c4_g1	TRINITY_DN3461_c11_g1	TRINITY_DN12004_c0_g1	TRINITY_DN16606_c4_g3	TRINITY_DN2873_c0_g1	TRINITY_DN4070_c0_g1	TRINITY_DN36799_c0_g1	TRINITY_DN95908_c0_g1	OG0000772	1	1	1	1	1	1	1	1	1	1	OG0000772	TRINITY_DN3461_c11_g1	TRINITY_DN16606_c4_g3	TRINITY_DN95908_c0_g1	TRINITY_DN2873_c0_g1	TRINITY_DN4070_c0_g1	TRINITY_DN12004_c0_g1	TRINITY_DN36799_c0_g1
OG0000773	TRINITY_DN2036_c0_g2, TRINITY_DN606_c0_g1		TRINITY_DN3521_c0_g3	TRINITY_DN17987_c5_g1	TRINITY_DN16583_c8_g1	TRINITY_DN21125_c0_g1, TRINITY_DN21534_c9_g1	TRINITY_DN18135_c0_g2, TRINITY_DN19301_c4_g1	TRINITY_DN18228_c4_g1, TRINITY_DN18545_c5_g1	TRINITY_DN38707_c0_g1, TRINITY_DN38707_c0_g2, TRINITY_DN46938_c0_g2	OG0000773	2	0	1	1	1	2	2	2	3	0	OG0000773	TRINITY_DN2036_c0_g2		TRINITY_DN3521_c0_g3	TRINITY_DN17987_c5_g1	TRINITY_DN16583_c8_g1	TRINITY_DN21534_c9_g1	TRINITY_DN19301_c4_g1	TRINITY_DN18228_c4_g1	TRINITY_DN38707_c0_g1	OG0000773	1	0	1	1	1	1	1	1	1	0	OG0000773	TRINITY_DN3521_c0_g3	TRINITY_DN16583_c8_g1	TRINITY_DN38707_c0_g1	TRINITY_DN21534_c9_g1	TRINITY_DN19301_c4_g1	TRINITY_DN17987_c5_g1	TRINITY_DN18228_c4_g1
OG0000776	TRINITY_DN1435_c0_g2	TRINITY_DN21974_c3_g1	TRINITY_DN361_c0_g1	TRINITY_DN20567_c0_g1	TRINITY_DN17430_c3_g1, TRINITY_DN19533_c5_g1	TRINITY_DN22671_c4_g2, TRINITY_DN23882_c4_g1	TRINITY_DN19648_c6_g3, TRINITY_DN23632_c2_g1	TRINITY_DN19284_c1_g2, TRINITY_DN21124_c5_g1	TRINITY_DN40015_c0_g1, TRINITY_DN48910_c2_g1	OG0000776	1	1	1	1	2	2	2	2	2	0	OG0000776	TRINITY_DN1435_c0_g2	TRINITY_DN21974_c3_g1	TRINITY_DN361_c0_g1	TRINITY_DN20567_c0_g1	TRINITY_DN19533_c5_g1	TRINITY_DN22671_c4_g2	TRINITY_DN23632_c2_g1	TRINITY_DN21124_c5_g1	TRINITY_DN48910_c2_g1	OG0000776	1	1	1	1	1	1	1	1	1	1	OG0000776	TRINITY_DN361_c0_g1	TRINITY_DN19533_c5_g1	TRINITY_DN48910_c2_g1	TRINITY_DN22671_c4_g2	TRINITY_DN23632_c2_g1	TRINITY_DN20567_c0_g1	TRINITY_DN21124_c5_g1
OG0000777	TRINITY_DN1823_c0_g1	TRINITY_DN1399_c0_g1, TRINITY_DN23447_c0_g1	TRINITY_DN3706_c0_g2		TRINITY_DN18217_c3_g1	TRINITY_DN22974_c11_g2, TRINITY_DN24513_c2_g4, TRINITY_DN24513_c2_g5	TRINITY_DN18434_c5_g2	TRINITY_DN18685_c3_g2, TRINITY_DN45332_c0_g1	TRINITY_DN44904_c5_g1, TRINITY_DN45112_c0_g1, TRINITY_DN45112_c0_g2	OG0000777	1	2	1	0	1	3	1	2	3	0	OG0000777	TRINITY_DN1823_c0_g1	TRINITY_DN23447_c0_g1	TRINITY_DN3706_c0_g2		TRINITY_DN18217_c3_g1	TRINITY_DN22974_c11_g2	TRINITY_DN18434_c5_g2	TRINITY_DN18685_c3_g2	TRINITY_DN45112_c0_g2	OG0000777	1	1	1	0	1	1	1	1	1	0	OG0000777	TRINITY_DN3706_c0_g2	TRINITY_DN18217_c3_g1	TRINITY_DN45112_c0_g2	TRINITY_DN22974_c11_g2	TRINITY_DN18434_c5_g2	TRINITY_UK00000_c0_g1	TRINITY_DN18685_c3_g2
OG0000779	TRINITY_DN371_c0_g2	TRINITY_DN22791_c3_g1, TRINITY_DN5683_c0_g1	TRINITY_DN3762_c1_g1	TRINITY_DN20306_c3_g1, TRINITY_DN20306_c3_g8	TRINITY_DN19310_c0_g2	TRINITY_DN23490_c4_g2, TRINITY_DN23490_c4_g5, TRINITY_DN23490_c4_g6	TRINITY_DN24127_c2_g1	TRINITY_DN19301_c1_g8, TRINITY_DN21137_c2_g1	TRINITY_DN48021_c2_g1	OG0000779	1	2	1	2	1	3	1	2	1	0	OG0000779	TRINITY_DN371_c0_g2	TRINITY_DN22791_c3_g1	TRINITY_DN3762_c1_g1	TRINITY_DN20306_c3_g1	TRINITY_DN19310_c0_g2	TRINITY_DN23490_c4_g5	TRINITY_DN24127_c2_g1	TRINITY_DN19301_c1_g8	TRINITY_DN48021_c2_g1	OG0000779	1	1	1	1	1	1	1	1	1	1	OG0000779	TRINITY_DN3762_c1_g1	TRINITY_DN19310_c0_g2	TRINITY_DN48021_c2_g1	TRINITY_DN23490_c4_g5	TRINITY_DN24127_c2_g1	TRINITY_DN20306_c3_g1	TRINITY_DN19301_c1_g8
OG0000780	TRINITY_DN1063_c1_g2	TRINITY_DN20008_c6_g1, TRINITY_DN22221_c0_g1	TRINITY_DN408_c4_g1, TRINITY_DN489_c1_g1	TRINITY_DN20483_c5_g1	TRINITY_DN18306_c3_g1, TRINITY_DN19047_c4_g1	TRINITY_DN22790_c1_g1, TRINITY_DN22790_c1_g5	TRINITY_DN19897_c5_g1	TRINITY_DN19831_c1_g1, TRINITY_DN19831_c1_g6	TRINITY_DN43604_c0_g1	OG0000780	1	2	2	1	2	2	1	2	1	0	OG0000780	TRINITY_DN1063_c1_g2	TRINITY_DN22221_c0_g1	TRINITY_DN408_c4_g1	TRINITY_DN20483_c5_g1	TRINITY_DN18306_c3_g1	TRINITY_DN22790_c1_g1	TRINITY_DN19897_c5_g1	TRINITY_DN19831_c1_g6	TRINITY_DN43604_c0_g1	OG0000780	1	1	1	1	1	1	1	1	1	1	OG0000780	TRINITY_DN408_c4_g1	TRINITY_DN18306_c3_g1	TRINITY_DN43604_c0_g1	TRINITY_DN22790_c1_g1	TRINITY_DN19897_c5_g1	TRINITY_DN20483_c5_g1	TRINITY_DN19831_c1_g6
OG0000781	TRINITY_DN1306_c0_g3	TRINITY_DN22044_c5_g2	TRINITY_DN4130_c7_g1, TRINITY_DN8042_c0_g4	TRINITY_DN14972_c5_g2, TRINITY_DN21016_c8_g5	TRINITY_DN18151_c0_g1	TRINITY_DN21978_c7_g4, TRINITY_DN22603_c6_g1	TRINITY_DN24539_c5_g1	TRINITY_DN20221_c0_g1, TRINITY_DN4351_c0_g1	TRINITY_DN45031_c2_g1, TRINITY_DN48470_c3_g1	OG0000781	1	1	2	2	1	2	1	2	2	0	OG0000781	TRINITY_DN1306_c0_g3	TRINITY_DN22044_c5_g2	TRINITY_DN4130_c7_g1	TRINITY_DN21016_c8_g5	TRINITY_DN18151_c0_g1	TRINITY_DN21978_c7_g4	TRINITY_DN24539_c5_g1	TRINITY_DN20221_c0_g1	TRINITY_DN45031_c2_g1	OG0000781	1	1	1	1	1	1	1	1	1	1	OG0000781	TRINITY_DN4130_c7_g1	TRINITY_DN18151_c0_g1	TRINITY_DN45031_c2_g1	TRINITY_DN21978_c7_g4	TRINITY_DN24539_c5_g1	TRINITY_DN21016_c8_g5	TRINITY_DN20221_c0_g1
OG0000782	TRINITY_DN1370_c2_g2, TRINITY_DN353_c0_g2	TRINITY_DN21533_c6_g1, TRINITY_DN23364_c1_g3	TRINITY_DN418_c0_g2	TRINITY_DN18378_c6_g1, TRINITY_DN19933_c4_g1	TRINITY_DN19134_c0_g1	TRINITY_DN24833_c3_g2	TRINITY_DN23960_c0_g1, TRINITY_DN24166_c5_g1	TRINITY_DN21233_c0_g2, TRINITY_DN21233_c0_g3	TRINITY_DN48921_c1_g1	OG0000782	2	2	1	2	1	1	2	2	1	0	OG0000782	TRINITY_DN353_c0_g2	TRINITY_DN23364_c1_g3	TRINITY_DN418_c0_g2	TRINITY_DN19933_c4_g1	TRINITY_DN19134_c0_g1	TRINITY_DN24833_c3_g2	TRINITY_DN23960_c0_g1	TRINITY_DN21233_c0_g2	TRINITY_DN48921_c1_g1	OG0000782	1	1	1	1	1	1	1	1	1	1	OG0000782	TRINITY_DN418_c0_g2	TRINITY_DN19134_c0_g1	TRINITY_DN48921_c1_g1	TRINITY_DN24833_c3_g2	TRINITY_DN23960_c0_g1	TRINITY_DN19933_c4_g1	TRINITY_DN21233_c0_g2
OG0000783	TRINITY_DN582_c0_g2	TRINITY_DN16203_c0_g2, TRINITY_DN23666_c2_g1	TRINITY_DN4391_c0_g3, TRINITY_DN4391_c2_g1	TRINITY_DN15075_c1_g1	TRINITY_DN18159_c6_g1, TRINITY_DN18159_c6_g2	TRINITY_DN23370_c10_g1, TRINITY_DN23370_c10_g2	TRINITY_DN20038_c2_g1, TRINITY_DN20038_c2_g2	TRINITY_DN20028_c0_g1	TRINITY_DN47124_c1_g1	OG0000783	1	2	2	1	2	2	2	1	1	0	OG0000783	TRINITY_DN582_c0_g2	TRINITY_DN23666_c2_g1	TRINITY_DN4391_c2_g1	TRINITY_DN15075_c1_g1	TRINITY_DN18159_c6_g2	TRINITY_DN23370_c10_g1	TRINITY_DN20038_c2_g2	TRINITY_DN20028_c0_g1	TRINITY_DN47124_c1_g1	OG0000783	1	1	1	1	1	1	1	1	1	1	OG0000783	TRINITY_DN4391_c2_g1	TRINITY_DN18159_c6_g2	TRINITY_DN47124_c1_g1	TRINITY_DN23370_c10_g1	TRINITY_DN20038_c2_g2	TRINITY_DN15075_c1_g1	TRINITY_DN20028_c0_g1
OG0000784	TRINITY_DN3400_c2_g1	TRINITY_DN18856_c4_g2	TRINITY_DN449_c0_g1	TRINITY_DN15353_c4_g1, TRINITY_DN18813_c4_g1	TRINITY_DN19169_c4_g1	TRINITY_DN23056_c7_g1, TRINITY_DN24293_c4_g3	TRINITY_DN22965_c6_g3, TRINITY_DN25186_c15_g3	TRINITY_DN19789_c8_g1, TRINITY_DN20923_c6_g3	TRINITY_DN44679_c0_g1, TRINITY_DN48579_c1_g1	OG0000784	1	1	1	2	1	2	2	2	2	0	OG0000784	TRINITY_DN3400_c2_g1	TRINITY_DN18856_c4_g2	TRINITY_DN449_c0_g1	TRINITY_DN18813_c4_g1	TRINITY_DN19169_c4_g1	TRINITY_DN23056_c7_g1	TRINITY_DN22965_c6_g3	TRINITY_DN20923_c6_g3	TRINITY_DN48579_c1_g1	OG0000784	1	1	1	1	1	1	1	1	1	1	OG0000784	TRINITY_DN449_c0_g1	TRINITY_DN19169_c4_g1	TRINITY_DN48579_c1_g1	TRINITY_DN23056_c7_g1	TRINITY_DN22965_c6_g3	TRINITY_DN18813_c4_g1	TRINITY_DN20923_c6_g3
OG0000785	TRINITY_DN3829_c0_g1	TRINITY_DN20365_c10_g1, TRINITY_DN22336_c1_g1	TRINITY_DN449_c2_g1	TRINITY_DN20944_c4_g1, TRINITY_DN21302_c5_g1	TRINITY_DN19706_c4_g1, TRINITY_DN19706_c4_g3	TRINITY_DN24911_c12_g1	TRINITY_DN20591_c2_g2, TRINITY_DN23727_c4_g1	TRINITY_DN19997_c13_g1, TRINITY_DN21141_c5_g1	TRINITY_DN48837_c2_g1	OG0000785	1	2	1	2	2	1	2	2	1	0	OG0000785	TRINITY_DN3829_c0_g1	TRINITY_DN20365_c10_g1	TRINITY_DN449_c2_g1	TRINITY_DN20944_c4_g1	TRINITY_DN19706_c4_g1	TRINITY_DN24911_c12_g1	TRINITY_DN23727_c4_g1	TRINITY_DN21141_c5_g1	TRINITY_DN48837_c2_g1	OG0000785	1	1	1	1	1	1	1	1	1	1	OG0000785	TRINITY_DN449_c2_g1	TRINITY_DN19706_c4_g1	TRINITY_DN48837_c2_g1	TRINITY_DN24911_c12_g1	TRINITY_DN23727_c4_g1	TRINITY_DN20944_c4_g1	TRINITY_DN21141_c5_g1
OG0000786	TRINITY_DN3425_c0_g3	TRINITY_DN21241_c7_g2	TRINITY_DN45731_c1_g1	TRINITY_DN13677_c8_g4	TRINITY_DN11839_c0_g1, TRINITY_DN11839_c0_g2, TRINITY_DN46295_c0_g1	TRINITY_DN27343_c0_g1, TRINITY_DN63169_c0_g1	TRINITY_DN12627_c0_g1, TRINITY_DN35006_c0_g1	TRINITY_DN19904_c3_g2	TRINITY_DN6254_c0_g1, TRINITY_DN95189_c0_g1	OG0000786	1	1	1	1	3	2	2	1	2	0	OG0000786	TRINITY_DN3425_c0_g3	TRINITY_DN21241_c7_g2	TRINITY_DN45731_c1_g1	TRINITY_DN13677_c8_g4	TRINITY_DN46295_c0_g1	TRINITY_DN27343_c0_g1	TRINITY_DN35006_c0_g1	TRINITY_DN19904_c3_g2	TRINITY_DN95189_c0_g1	OG0000786	1	1	1	1	1	1	1	1	1	1	OG0000786	TRINITY_DN45731_c1_g1	TRINITY_DN46295_c0_g1	TRINITY_DN95189_c0_g1	TRINITY_DN27343_c0_g1	TRINITY_DN35006_c0_g1	TRINITY_DN13677_c8_g4	TRINITY_DN19904_c3_g2
OG0000787	TRINITY_DN16916_c0_g1	TRINITY_DN19932_c4_g1	TRINITY_DN4587_c3_g1, TRINITY_DN6298_c0_g2	TRINITY_DN20327_c0_g1	TRINITY_DN16426_c8_g2	TRINITY_DN23272_c2_g1, TRINITY_DN23407_c0_g2	TRINITY_DN19402_c2_g1, TRINITY_DN20850_c9_g1	TRINITY_DN19000_c3_g5, TRINITY_DN20978_c4_g2	TRINITY_DN43699_c1_g3, TRINITY_DN46644_c1_g7	OG0000787	1	1	2	1	1	2	2	2	2	0	OG0000787	TRINITY_DN16916_c0_g1	TRINITY_DN19932_c4_g1	TRINITY_DN6298_c0_g2	TRINITY_DN20327_c0_g1	TRINITY_DN16426_c8_g2	TRINITY_DN23272_c2_g1	TRINITY_DN20850_c9_g1	TRINITY_DN20978_c4_g2	TRINITY_DN46644_c1_g7	OG0000787	1	1	1	1	1	1	1	1	1	1	OG0000787	TRINITY_DN6298_c0_g2	TRINITY_DN16426_c8_g2	TRINITY_DN46644_c1_g7	TRINITY_DN23272_c2_g1	TRINITY_DN20850_c9_g1	TRINITY_DN20327_c0_g1	TRINITY_DN20978_c4_g2
OG0000788	TRINITY_DN2279_c0_g1	TRINITY_DN22387_c6_g4, TRINITY_DN22826_c4_g1, TRINITY_DN22826_c4_g12	TRINITY_DN463_c0_g2	TRINITY_DN18518_c10_g4, TRINITY_DN21309_c4_g1	TRINITY_DN19522_c1_g1	TRINITY_DN24734_c6_g2	TRINITY_DN23628_c3_g2, TRINITY_DN24441_c8_g1	TRINITY_DN20022_c6_g5	TRINITY_DN46342_c1_g1, TRINITY_DN48109_c4_g1	OG0000788	1	3	1	2	1	1	2	1	2	0	OG0000788	TRINITY_DN2279_c0_g1	TRINITY_DN22387_c6_g4	TRINITY_DN463_c0_g2	TRINITY_DN21309_c4_g1	TRINITY_DN19522_c1_g1	TRINITY_DN24734_c6_g2	TRINITY_DN24441_c8_g1	TRINITY_DN20022_c6_g5	TRINITY_DN48109_c4_g1	OG0000788	1	1	1	1	1	1	1	1	1	1	OG0000788	TRINITY_DN463_c0_g2	TRINITY_DN19522_c1_g1	TRINITY_DN48109_c4_g1	TRINITY_DN24734_c6_g2	TRINITY_DN24441_c8_g1	TRINITY_DN21309_c4_g1	TRINITY_DN20022_c6_g5
OG0000789	TRINITY_DN372_c0_g1		TRINITY_DN4669_c10_g1, TRINITY_DN4669_c1_g1, TRINITY_DN4669_c4_g1		TRINITY_DN14462_c0_g1	TRINITY_DN37829_c0_g1, TRINITY_DN51710_c0_g1, TRINITY_DN8388_c0_g1	TRINITY_DN15498_c0_g1	TRINITY_DN10781_c0_g2, TRINITY_DN32224_c0_g1	TRINITY_DN30195_c0_g1, TRINITY_DN30195_c1_g1, TRINITY_DN62062_c0_g1	OG0000789	1	0	3	0	1	3	1	2	3	0	OG0000789	TRINITY_DN372_c0_g1		TRINITY_DN4669_c4_g1		TRINITY_DN14462_c0_g1	TRINITY_DN8388_c0_g1	TRINITY_DN15498_c0_g1	TRINITY_DN32224_c0_g1	TRINITY_DN62062_c0_g1	OG0000789	1	0	1	0	1	1	1	1	1	0	OG0000789	TRINITY_DN4669_c4_g1	TRINITY_DN14462_c0_g1	TRINITY_DN62062_c0_g1	TRINITY_DN8388_c0_g1	TRINITY_DN15498_c0_g1	TRINITY_UK00000_c0_g1	TRINITY_DN32224_c0_g1
OG0000790	TRINITY_DN498_c0_g1	TRINITY_DN22931_c5_g1	TRINITY_DN4902_c0_g3, TRINITY_DN4902_c1_g1		TRINITY_DN16266_c1_g1	TRINITY_DN20867_c0_g1, TRINITY_DN20867_c0_g2, TRINITY_DN20867_c0_g3	TRINITY_DN19009_c4_g3	TRINITY_DN14348_c0_g1, TRINITY_DN14348_c0_g2, TRINITY_DN47705_c0_g1	TRINITY_DN12209_c0_g1, TRINITY_DN38971_c0_g1	OG0000790	1	1	2	0	1	3	1	3	2	0	OG0000790	TRINITY_DN498_c0_g1	TRINITY_DN22931_c5_g1	TRINITY_DN4902_c1_g1		TRINITY_DN16266_c1_g1	TRINITY_DN20867_c0_g1	TRINITY_DN19009_c4_g3	TRINITY_DN14348_c0_g2	TRINITY_DN38971_c0_g1	OG0000790	1	1	1	0	1	1	1	1	1	0	OG0000790	TRINITY_DN4902_c1_g1	TRINITY_DN16266_c1_g1	TRINITY_DN38971_c0_g1	TRINITY_DN20867_c0_g1	TRINITY_DN19009_c4_g3	TRINITY_UK00000_c0_g1	TRINITY_DN14348_c0_g2
OG0000791	TRINITY_DN565_c1_g1	TRINITY_DN21678_c6_g1, TRINITY_DN22224_c1_g1	TRINITY_DN492_c0_g2	TRINITY_DN19401_c2_g1, TRINITY_DN21054_c5_g1	TRINITY_DN17798_c6_g1, TRINITY_DN19608_c5_g3	TRINITY_DN22725_c7_g1, TRINITY_DN22918_c1_g2	TRINITY_DN24958_c4_g2	TRINITY_DN20150_c3_g1, TRINITY_DN21054_c4_g1	TRINITY_DN48379_c1_g2	OG0000791	1	2	1	2	2	2	1	2	1	0	OG0000791	TRINITY_DN565_c1_g1	TRINITY_DN21678_c6_g1	TRINITY_DN492_c0_g2	TRINITY_DN19401_c2_g1	TRINITY_DN19608_c5_g3	TRINITY_DN22918_c1_g2	TRINITY_DN24958_c4_g2	TRINITY_DN21054_c4_g1	TRINITY_DN48379_c1_g2	OG0000791	1	1	1	1	1	1	1	1	1	1	OG0000791	TRINITY_DN492_c0_g2	TRINITY_DN19608_c5_g3	TRINITY_DN48379_c1_g2	TRINITY_DN22918_c1_g2	TRINITY_DN24958_c4_g2	TRINITY_DN19401_c2_g1	TRINITY_DN21054_c4_g1
OG0000792		TRINITY_DN23845_c1_g1	TRINITY_DN4954_c3_g1, TRINITY_DN4954_c4_g1	TRINITY_DN15724_c3_g1, TRINITY_DN15724_c3_g6		TRINITY_DN24499_c6_g4, TRINITY_DN24499_c6_g7	TRINITY_DN15649_c0_g1, TRINITY_DN15649_c0_g2	TRINITY_DN13707_c0_g1, TRINITY_DN18852_c8_g2	TRINITY_DN10857_c0_g1, TRINITY_DN42511_c2_g1, TRINITY_DN42511_c3_g3	OG0000792	0	1	2	2	0	2	2	2	3	0	OG0000792		TRINITY_DN23845_c1_g1	TRINITY_DN4954_c4_g1	TRINITY_DN15724_c3_g1		TRINITY_DN24499_c6_g4	TRINITY_DN15649_c0_g2	TRINITY_DN18852_c8_g2	TRINITY_DN42511_c2_g1	OG0000792	0	1	1	1	0	1	1	1	1	0	OG0000792	TRINITY_DN4954_c4_g1	TRINITY_UK00000_c0_g1	TRINITY_DN42511_c2_g1	TRINITY_DN24499_c6_g4	TRINITY_DN15649_c0_g2	TRINITY_DN15724_c3_g1	TRINITY_DN18852_c8_g2
OG0000793	TRINITY_DN558_c1_g1	TRINITY_DN19464_c1_g2, TRINITY_DN23747_c2_g2	TRINITY_DN498_c0_g1	TRINITY_DN17487_c4_g1, TRINITY_DN17487_c4_g2	TRINITY_DN19167_c2_g1	TRINITY_DN22484_c0_g1	TRINITY_DN24237_c2_g1	TRINITY_DN20906_c0_g1, TRINITY_DN20906_c0_g2	TRINITY_DN37286_c0_g1, TRINITY_DN48904_c1_g1, TRINITY_DN48904_c1_g2	OG0000793	1	2	1	2	1	1	1	2	3	0	OG0000793	TRINITY_DN558_c1_g1	TRINITY_DN19464_c1_g2	TRINITY_DN498_c0_g1	TRINITY_DN17487_c4_g1	TRINITY_DN19167_c2_g1	TRINITY_DN22484_c0_g1	TRINITY_DN24237_c2_g1	TRINITY_DN20906_c0_g2	TRINITY_DN37286_c0_g1	OG0000793	1	1	1	1	1	1	1	1	1	1	OG0000793	TRINITY_DN498_c0_g1	TRINITY_DN19167_c2_g1	TRINITY_DN37286_c0_g1	TRINITY_DN22484_c0_g1	TRINITY_DN24237_c2_g1	TRINITY_DN17487_c4_g1	TRINITY_DN20906_c0_g2
OG0000795	TRINITY_DN4523_c1_g2, TRINITY_DN4523_c1_g3	TRINITY_DN21172_c3_g1	TRINITY_DN5055_c0_g1	TRINITY_DN2657_c0_g1, TRINITY_DN2657_c0_g2	TRINITY_DN24815_c0_g1		TRINITY_DN15171_c0_g1, TRINITY_DN15171_c0_g2	TRINITY_DN21499_c0_g1, TRINITY_DN35373_c0_g1, TRINITY_DN44202_c0_g1	TRINITY_DN14887_c0_g1, TRINITY_DN94677_c0_g1	OG0000795	2	1	1	2	1	0	2	3	2	0	OG0000795	TRINITY_DN4523_c1_g2	TRINITY_DN21172_c3_g1	TRINITY_DN5055_c0_g1	TRINITY_DN2657_c0_g1	TRINITY_DN24815_c0_g1		TRINITY_DN15171_c0_g1	TRINITY_DN21499_c0_g1	TRINITY_DN94677_c0_g1	OG0000795	1	1	1	1	1	0	1	1	1	0	OG0000795	TRINITY_DN5055_c0_g1	TRINITY_DN24815_c0_g1	TRINITY_DN94677_c0_g1	TRINITY_UK00000_c0_g1	TRINITY_DN15171_c0_g1	TRINITY_DN2657_c0_g1	TRINITY_DN21499_c0_g1
OG0000800	TRINITY_DN917_c3_g1	TRINITY_DN19410_c1_g1	TRINITY_DN542_c0_g1	TRINITY_DN19426_c6_g1	TRINITY_DN18398_c8_g1, TRINITY_DN19582_c5_g1	TRINITY_DN21761_c15_g1, TRINITY_DN23727_c5_g1	TRINITY_DN20349_c9_g1, TRINITY_DN24816_c8_g1	TRINITY_DN18739_c2_g2, TRINITY_DN18739_c2_g3	TRINITY_DN48135_c0_g1, TRINITY_DN48623_c1_g1	OG0000800	1	1	1	1	2	2	2	2	2	0	OG0000800	TRINITY_DN917_c3_g1	TRINITY_DN19410_c1_g1	TRINITY_DN542_c0_g1	TRINITY_DN19426_c6_g1	TRINITY_DN19582_c5_g1	TRINITY_DN21761_c15_g1	TRINITY_DN24816_c8_g1	TRINITY_DN18739_c2_g3	TRINITY_DN48623_c1_g1	OG0000800	1	1	1	1	1	1	1	1	1	1	OG0000800	TRINITY_DN542_c0_g1	TRINITY_DN19582_c5_g1	TRINITY_DN48623_c1_g1	TRINITY_DN21761_c15_g1	TRINITY_DN24816_c8_g1	TRINITY_DN19426_c6_g1	TRINITY_DN18739_c2_g3
OG0000801	TRINITY_DN2835_c14_g1, TRINITY_DN2835_c1_g3, TRINITY_DN50936_c0_g1	TRINITY_DN21712_c7_g1, TRINITY_DN21712_c7_g5	TRINITY_DN5442_c0_g1	TRINITY_DN13941_c10_g1	TRINITY_DN18105_c3_g1, TRINITY_DN18105_c3_g2, TRINITY_DN28065_c0_g1	TRINITY_DN22513_c10_g1		TRINITY_DN18619_c2_g1	TRINITY_DN44942_c0_g1, TRINITY_DN46829_c6_g1	OG0000801	3	2	1	1	3	1	0	1	2	0	OG0000801	TRINITY_DN2835_c1_g3	TRINITY_DN21712_c7_g1	TRINITY_DN5442_c0_g1	TRINITY_DN13941_c10_g1	TRINITY_DN18105_c3_g1	TRINITY_DN22513_c10_g1		TRINITY_DN18619_c2_g1	TRINITY_DN44942_c0_g1	OG0000801	1	1	1	1	1	1	0	1	1	0	OG0000801	TRINITY_DN5442_c0_g1	TRINITY_DN18105_c3_g1	TRINITY_DN44942_c0_g1	TRINITY_DN22513_c10_g1	TRINITY_UK00000_c0_g1	TRINITY_DN13941_c10_g1	TRINITY_DN18619_c2_g1
OG0000803	TRINITY_DN1107_c0_g1	TRINITY_DN19084_c9_g1, TRINITY_DN22331_c6_g1, TRINITY_DN24222_c0_g1	TRINITY_DN590_c0_g1, TRINITY_DN768_c0_g1	TRINITY_DN12930_c7_g1, TRINITY_DN17757_c7_g1	TRINITY_DN19164_c7_g1	TRINITY_DN22237_c3_g1	TRINITY_DN20532_c4_g1, TRINITY_DN25130_c5_g2	TRINITY_DN18916_c6_g1	TRINITY_DN45816_c5_g1	OG0000803	1	3	2	2	1	1	2	1	1	0	OG0000803	TRINITY_DN1107_c0_g1	TRINITY_DN22331_c6_g1	TRINITY_DN768_c0_g1	TRINITY_DN12930_c7_g1	TRINITY_DN19164_c7_g1	TRINITY_DN22237_c3_g1	TRINITY_DN25130_c5_g2	TRINITY_DN18916_c6_g1	TRINITY_DN45816_c5_g1	OG0000803	1	1	1	1	1	1	1	1	1	1	OG0000803	TRINITY_DN768_c0_g1	TRINITY_DN19164_c7_g1	TRINITY_DN45816_c5_g1	TRINITY_DN22237_c3_g1	TRINITY_DN25130_c5_g2	TRINITY_DN12930_c7_g1	TRINITY_DN18916_c6_g1
OG0000804	TRINITY_DN1103_c1_g1	TRINITY_DN20374_c0_g1, TRINITY_DN3172_c0_g1	TRINITY_DN5914_c3_g1	TRINITY_DN15444_c5_g1, TRINITY_DN18099_c0_g2	TRINITY_DN16703_c8_g1, TRINITY_DN19408_c6_g2	TRINITY_DN23133_c8_g2	TRINITY_DN22074_c1_g1, TRINITY_DN25306_c3_g2	TRINITY_DN18398_c5_g2	TRINITY_DN46983_c0_g1, TRINITY_DN47623_c0_g1	OG0000804	1	2	1	2	2	1	2	1	2	0	OG0000804	TRINITY_DN1103_c1_g1	TRINITY_DN20374_c0_g1	TRINITY_DN5914_c3_g1	TRINITY_DN18099_c0_g2	TRINITY_DN19408_c6_g2	TRINITY_DN23133_c8_g2	TRINITY_DN25306_c3_g2	TRINITY_DN18398_c5_g2	TRINITY_DN46983_c0_g1	OG0000804	1	1	1	1	1	1	1	1	1	1	OG0000804	TRINITY_DN5914_c3_g1	TRINITY_DN19408_c6_g2	TRINITY_DN46983_c0_g1	TRINITY_DN23133_c8_g2	TRINITY_DN25306_c3_g2	TRINITY_DN18099_c0_g2	TRINITY_DN18398_c5_g2
OG0000806	TRINITY_DN2939_c2_g1, TRINITY_DN3945_c0_g2	TRINITY_DN19424_c8_g1, TRINITY_DN53487_c0_g1, TRINITY_DN6399_c0_g1	TRINITY_DN609_c2_g1	TRINITY_DN13613_c8_g1, TRINITY_DN13613_c8_g2	TRINITY_DN17917_c7_g1	TRINITY_DN22753_c1_g1	TRINITY_DN22989_c1_g1	TRINITY_DN1787_c0_g1, TRINITY_DN20673_c6_g2	TRINITY_DN40522_c0_g1	OG0000806	2	3	1	2	1	1	1	2	1	0	OG0000806	TRINITY_DN3945_c0_g2	TRINITY_DN19424_c8_g1	TRINITY_DN609_c2_g1	TRINITY_DN13613_c8_g1	TRINITY_DN17917_c7_g1	TRINITY_DN22753_c1_g1	TRINITY_DN22989_c1_g1	TRINITY_DN20673_c6_g2	TRINITY_DN40522_c0_g1	OG0000806	1	1	1	1	1	1	1	1	1	1	OG0000806	TRINITY_DN609_c2_g1	TRINITY_DN17917_c7_g1	TRINITY_DN40522_c0_g1	TRINITY_DN22753_c1_g1	TRINITY_DN22989_c1_g1	TRINITY_DN13613_c8_g1	TRINITY_DN20673_c6_g2
OG0000807	TRINITY_DN2470_c0_g1	TRINITY_DN21093_c3_g2, TRINITY_DN21093_c3_g4, TRINITY_DN21093_c3_g5	TRINITY_DN6173_c1_g1	TRINITY_DN20344_c6_g2	TRINITY_DN18963_c6_g2	TRINITY_DN22148_c10_g2	TRINITY_DN19969_c4_g4	TRINITY_DN18406_c7_g1, TRINITY_DN30681_c0_g1	TRINITY_DN19212_c0_g1, TRINITY_DN44263_c8_g2, TRINITY_DN48700_c5_g2	OG0000807	1	3	1	1	1	1	1	2	3	0	OG0000807	TRINITY_DN2470_c0_g1	TRINITY_DN21093_c3_g2	TRINITY_DN6173_c1_g1	TRINITY_DN20344_c6_g2	TRINITY_DN18963_c6_g2	TRINITY_DN22148_c10_g2	TRINITY_DN19969_c4_g4	TRINITY_DN18406_c7_g1	TRINITY_DN48700_c5_g2	OG0000807	1	1	1	1	1	1	1	1	1	1	OG0000807	TRINITY_DN6173_c1_g1	TRINITY_DN18963_c6_g2	TRINITY_DN48700_c5_g2	TRINITY_DN22148_c10_g2	TRINITY_DN19969_c4_g4	TRINITY_DN20344_c6_g2	TRINITY_DN18406_c7_g1
OG0000808	TRINITY_DN3168_c0_g1	TRINITY_DN27085_c0_g1	TRINITY_DN617_c0_g2	TRINITY_DN20941_c6_g1, TRINITY_DN20941_c6_g2	TRINITY_DN18000_c6_g1, TRINITY_DN41422_c0_g1	TRINITY_DN23708_c9_g1	TRINITY_DN22148_c8_g1, TRINITY_DN22270_c3_g1	TRINITY_DN19586_c1_g1, TRINITY_DN20779_c12_g1	TRINITY_DN45871_c4_g1, TRINITY_DN47237_c8_g1	OG0000808	1	1	1	2	2	1	2	2	2	0	OG0000808	TRINITY_DN3168_c0_g1	TRINITY_DN27085_c0_g1	TRINITY_DN617_c0_g2	TRINITY_DN20941_c6_g1	TRINITY_DN18000_c6_g1	TRINITY_DN23708_c9_g1	TRINITY_DN22270_c3_g1	TRINITY_DN20779_c12_g1	TRINITY_DN45871_c4_g1	OG0000808	1	1	1	1	1	1	1	1	1	1	OG0000808	TRINITY_DN617_c0_g2	TRINITY_DN18000_c6_g1	TRINITY_DN45871_c4_g1	TRINITY_DN23708_c9_g1	TRINITY_DN22270_c3_g1	TRINITY_DN20941_c6_g1	TRINITY_DN20779_c12_g1
OG0000809	TRINITY_DN4341_c0_g2	TRINITY_DN19697_c2_g1, TRINITY_DN23598_c6_g4	TRINITY_DN6427_c0_g2	TRINITY_DN14444_c6_g2, TRINITY_DN19914_c2_g3	TRINITY_DN15520_c0_g1, TRINITY_DN25892_c0_g1	TRINITY_DN23270_c5_g1	TRINITY_DN22240_c11_g3	TRINITY_DN17243_c0_g1	TRINITY_DN13420_c0_g1, TRINITY_DN37372_c0_g1, TRINITY_DN89670_c0_g1	OG0000809	1	2	1	2	2	1	1	1	3	0	OG0000809	TRINITY_DN4341_c0_g2	TRINITY_DN23598_c6_g4	TRINITY_DN6427_c0_g2	TRINITY_DN14444_c6_g2	TRINITY_DN15520_c0_g1	TRINITY_DN23270_c5_g1	TRINITY_DN22240_c11_g3	TRINITY_DN17243_c0_g1	TRINITY_DN13420_c0_g1	OG0000809	1	1	1	1	1	1	1	1	1	1	OG0000809	TRINITY_DN6427_c0_g2	TRINITY_DN15520_c0_g1	TRINITY_DN13420_c0_g1	TRINITY_DN23270_c5_g1	TRINITY_DN22240_c11_g3	TRINITY_DN14444_c6_g2	TRINITY_DN17243_c0_g1
OG0000810	TRINITY_DN5635_c1_g1, TRINITY_DN5768_c0_g1	TRINITY_DN22636_c6_g1	TRINITY_DN6492_c1_g1, TRINITY_DN6492_c4_g1	TRINITY_DN4842_c0_g1	TRINITY_DN37804_c0_g1, TRINITY_DN45962_c0_g1	TRINITY_DN8114_c0_g1	TRINITY_DN23131_c8_g1	TRINITY_DN21954_c0_g1, TRINITY_DN36219_c0_g1, TRINITY_DN47062_c0_g1	TRINITY_DN28562_c0_g1	OG0000810	2	1	2	1	2	1	1	3	1	0	OG0000810	TRINITY_DN5768_c0_g1	TRINITY_DN22636_c6_g1	TRINITY_DN6492_c4_g1	TRINITY_DN4842_c0_g1	TRINITY_DN37804_c0_g1	TRINITY_DN8114_c0_g1	TRINITY_DN23131_c8_g1	TRINITY_DN36219_c0_g1	TRINITY_DN28562_c0_g1	OG0000810	1	1	1	1	1	1	1	1	1	1	OG0000810	TRINITY_DN6492_c4_g1	TRINITY_DN37804_c0_g1	TRINITY_DN28562_c0_g1	TRINITY_DN8114_c0_g1	TRINITY_DN23131_c8_g1	TRINITY_DN4842_c0_g1	TRINITY_DN36219_c0_g1
OG0000811	TRINITY_DN2445_c1_g1	TRINITY_DN23798_c4_g1, TRINITY_DN23798_c4_g5	TRINITY_DN653_c0_g1	TRINITY_DN16040_c1_g1, TRINITY_DN16040_c1_g2, TRINITY_DN18549_c5_g2	TRINITY_DN18730_c7_g1	TRINITY_DN23529_c5_g2	TRINITY_DN20883_c2_g1, TRINITY_DN21912_c0_g1	TRINITY_DN19245_c6_g3, TRINITY_DN19705_c1_g1	TRINITY_DN48831_c3_g1	OG0000811	1	2	1	3	1	1	2	2	1	0	OG0000811	TRINITY_DN2445_c1_g1	TRINITY_DN23798_c4_g5	TRINITY_DN653_c0_g1	TRINITY_DN16040_c1_g1	TRINITY_DN18730_c7_g1	TRINITY_DN23529_c5_g2	TRINITY_DN21912_c0_g1	TRINITY_DN19245_c6_g3	TRINITY_DN48831_c3_g1	OG0000811	1	1	1	1	1	1	1	1	1	1	OG0000811	TRINITY_DN653_c0_g1	TRINITY_DN18730_c7_g1	TRINITY_DN48831_c3_g1	TRINITY_DN23529_c5_g2	TRINITY_DN21912_c0_g1	TRINITY_DN16040_c1_g1	TRINITY_DN19245_c6_g3
OG0000813	TRINITY_DN3369_c0_g1	TRINITY_DN19396_c3_g1, TRINITY_DN19396_c3_g2	TRINITY_DN670_c1_g2	TRINITY_DN21109_c3_g1, TRINITY_DN21109_c3_g6	TRINITY_DN16868_c4_g4, TRINITY_DN19803_c1_g11	TRINITY_DN24058_c1_g1	TRINITY_DN24334_c6_g1	TRINITY_DN19177_c5_g1, TRINITY_DN19177_c5_g8	TRINITY_DN44213_c2_g1, TRINITY_DN48167_c2_g1	OG0000813	1	2	1	2	2	1	1	2	2	0	OG0000813	TRINITY_DN3369_c0_g1	TRINITY_DN19396_c3_g1	TRINITY_DN670_c1_g2	TRINITY_DN21109_c3_g6	TRINITY_DN16868_c4_g4	TRINITY_DN24058_c1_g1	TRINITY_DN24334_c6_g1	TRINITY_DN19177_c5_g1	TRINITY_DN48167_c2_g1	OG0000813	1	1	1	1	1	1	1	1	1	1	OG0000813	TRINITY_DN670_c1_g2	TRINITY_DN16868_c4_g4	TRINITY_DN48167_c2_g1	TRINITY_DN24058_c1_g1	TRINITY_DN24334_c6_g1	TRINITY_DN21109_c3_g6	TRINITY_DN19177_c5_g1
OG0000814	TRINITY_DN477_c0_g4	TRINITY_DN19480_c3_g1, TRINITY_DN20533_c4_g2	TRINITY_DN7171_c0_g1	TRINITY_DN13157_c5_g1	TRINITY_DN16248_c12_g1, TRINITY_DN18287_c11_g3	TRINITY_DN23262_c8_g2	TRINITY_DN25151_c7_g1, TRINITY_DN25358_c9_g2	TRINITY_DN18867_c6_g10, TRINITY_DN19945_c9_g2	TRINITY_DN45034_c13_g1, TRINITY_DN46291_c12_g3	OG0000814	1	2	1	1	2	1	2	2	2	0	OG0000814	TRINITY_DN477_c0_g4	TRINITY_DN19480_c3_g1	TRINITY_DN7171_c0_g1	TRINITY_DN13157_c5_g1	TRINITY_DN16248_c12_g1	TRINITY_DN23262_c8_g2	TRINITY_DN25151_c7_g1	TRINITY_DN18867_c6_g10	TRINITY_DN45034_c13_g1	OG0000814	1	1	1	1	1	1	1	1	1	1	OG0000814	TRINITY_DN7171_c0_g1	TRINITY_DN16248_c12_g1	TRINITY_DN45034_c13_g1	TRINITY_DN23262_c8_g2	TRINITY_DN25151_c7_g1	TRINITY_DN13157_c5_g1	TRINITY_DN18867_c6_g10
OG0000817	TRINITY_DN8408_c0_g2	TRINITY_DN18143_c0_g2	TRINITY_DN7630_c1_g3, TRINITY_DN7630_c2_g1	TRINITY_DN19902_c2_g2, TRINITY_DN28652_c0_g1	TRINITY_DN17766_c5_g3	TRINITY_DN21548_c0_g1	TRINITY_DN19025_c4_g1	TRINITY_DN2093_c0_g1, TRINITY_DN34515_c0_g1, TRINITY_DN46441_c0_g1	TRINITY_DN47429_c0_g2, TRINITY_DN47429_c1_g1	OG0000817	1	1	2	2	1	1	1	3	2	0	OG0000817	TRINITY_DN8408_c0_g2	TRINITY_DN18143_c0_g2	TRINITY_DN7630_c2_g1	TRINITY_DN19902_c2_g2	TRINITY_DN17766_c5_g3	TRINITY_DN21548_c0_g1	TRINITY_DN19025_c4_g1	TRINITY_DN34515_c0_g1	TRINITY_DN47429_c1_g1	OG0000817	1	1	1	1	1	1	1	1	1	1	OG0000817	TRINITY_DN7630_c2_g1	TRINITY_DN17766_c5_g3	TRINITY_DN47429_c1_g1	TRINITY_DN21548_c0_g1	TRINITY_DN19025_c4_g1	TRINITY_DN19902_c2_g2	TRINITY_DN34515_c0_g1
OG0000821	TRINITY_DN366_c0_g2	TRINITY_DN18687_c5_g10, TRINITY_DN18687_c5_g4	TRINITY_DN832_c0_g5	TRINITY_DN20815_c5_g3	TRINITY_DN18614_c3_g1	TRINITY_DN22594_c6_g1	TRINITY_DN22824_c1_g3, TRINITY_DN24181_c7_g4, TRINITY_DN25240_c3_g1	TRINITY_DN18176_c8_g13, TRINITY_DN18176_c8_g3	TRINITY_DN42900_c6_g1, TRINITY_DN48506_c5_g1	OG0000821	1	2	1	1	1	1	3	2	2	0	OG0000821	TRINITY_DN366_c0_g2	TRINITY_DN18687_c5_g4	TRINITY_DN832_c0_g5	TRINITY_DN20815_c5_g3	TRINITY_DN18614_c3_g1	TRINITY_DN22594_c6_g1	TRINITY_DN22824_c1_g3	TRINITY_DN18176_c8_g13	TRINITY_DN48506_c5_g1	OG0000821	1	1	1	1	1	1	1	1	1	1	OG0000821	TRINITY_DN832_c0_g5	TRINITY_DN18614_c3_g1	TRINITY_DN48506_c5_g1	TRINITY_DN22594_c6_g1	TRINITY_DN22824_c1_g3	TRINITY_DN20815_c5_g3	TRINITY_DN18176_c8_g13
OG0000825	TRINITY_DN184_c0_g2	TRINITY_DN18250_c3_g3, TRINITY_DN23948_c10_g1	TRINITY_DN92_c1_g1	TRINITY_DN20966_c5_g1, TRINITY_DN20966_c5_g3	TRINITY_DN19561_c3_g1	TRINITY_DN23047_c4_g2, TRINITY_DN24533_c7_g2	TRINITY_DN19503_c0_g1, TRINITY_DN22238_c7_g2	TRINITY_DN19499_c4_g1, TRINITY_DN20909_c4_g2	TRINITY_DN48532_c0_g1	OG0000825	1	2	1	2	1	2	2	2	1	0	OG0000825	TRINITY_DN184_c0_g2	TRINITY_DN23948_c10_g1	TRINITY_DN92_c1_g1	TRINITY_DN20966_c5_g1	TRINITY_DN19561_c3_g1	TRINITY_DN24533_c7_g2	TRINITY_DN22238_c7_g2	TRINITY_DN19499_c4_g1	TRINITY_DN48532_c0_g1	OG0000825	1	1	1	1	1	1	1	1	1	1	OG0000825	TRINITY_DN92_c1_g1	TRINITY_DN19561_c3_g1	TRINITY_DN48532_c0_g1	TRINITY_DN24533_c7_g2	TRINITY_DN22238_c7_g2	TRINITY_DN20966_c5_g1	TRINITY_DN19499_c4_g1
OG0000826	TRINITY_DN670_c0_g3	TRINITY_DN23752_c4_g1	TRINITY_DN935_c8_g1	TRINITY_DN19597_c3_g1, TRINITY_DN19597_c3_g2	TRINITY_DN19402_c2_g1	TRINITY_DN24144_c10_g1, TRINITY_DN24144_c10_g2	TRINITY_DN20494_c3_g1, TRINITY_DN23569_c2_g4	TRINITY_DN21031_c3_g1, TRINITY_DN21379_c8_g1	TRINITY_DN48098_c0_g1, TRINITY_DN48098_c0_g2	OG0000826	1	1	1	2	1	2	2	2	2	0	OG0000826	TRINITY_DN670_c0_g3	TRINITY_DN23752_c4_g1	TRINITY_DN935_c8_g1	TRINITY_DN19597_c3_g1	TRINITY_DN19402_c2_g1	TRINITY_DN24144_c10_g2	TRINITY_DN20494_c3_g1	TRINITY_DN21031_c3_g1	TRINITY_DN48098_c0_g1	OG0000826	1	1	1	1	1	1	1	1	1	1	OG0000826	TRINITY_DN935_c8_g1	TRINITY_DN19402_c2_g1	TRINITY_DN48098_c0_g1	TRINITY_DN24144_c10_g2	TRINITY_DN20494_c3_g1	TRINITY_DN19597_c3_g1	TRINITY_DN21031_c3_g1
OG0000827	TRINITY_DN1173_c0_g2	TRINITY_DN19905_c3_g1	TRINITY_DN93_c0_g1	TRINITY_DN13769_c10_g2, TRINITY_DN17568_c5_g3	TRINITY_DN17117_c6_g4, TRINITY_DN17117_c6_g8	TRINITY_DN23227_c10_g1, TRINITY_DN23232_c3_g2, TRINITY_DN23232_c3_g5	TRINITY_DN22932_c3_g2	TRINITY_DN19063_c4_g3, TRINITY_DN21234_c9_g4	TRINITY_DN47559_c2_g1	OG0000827	1	1	1	2	2	3	1	2	1	0	OG0000827	TRINITY_DN1173_c0_g2	TRINITY_DN19905_c3_g1	TRINITY_DN93_c0_g1	TRINITY_DN17568_c5_g3	TRINITY_DN17117_c6_g8	TRINITY_DN23232_c3_g2	TRINITY_DN22932_c3_g2	TRINITY_DN19063_c4_g3	TRINITY_DN47559_c2_g1	OG0000827	1	1	1	1	1	1	1	1	1	1	OG0000827	TRINITY_DN93_c0_g1	TRINITY_DN17117_c6_g8	TRINITY_DN47559_c2_g1	TRINITY_DN23232_c3_g2	TRINITY_DN22932_c3_g2	TRINITY_DN17568_c5_g3	TRINITY_DN19063_c4_g3
OG0000828	TRINITY_DN375_c1_g1	TRINITY_DN23357_c5_g1	TRINITY_DN9528_c1_g1, TRINITY_DN9528_c2_g1, TRINITY_DN9528_c5_g1	TRINITY_DN14920_c9_g2	TRINITY_DN15911_c0_g1	TRINITY_DN22914_c7_g3, TRINITY_DN22914_c7_g9	TRINITY_DN21530_c0_g1	TRINITY_DN16920_c0_g1	TRINITY_DN38844_c0_g1, TRINITY_DN39935_c0_g1, TRINITY_DN7770_c0_g1	OG0000828	1	1	3	1	1	2	1	1	3	0	OG0000828	TRINITY_DN375_c1_g1	TRINITY_DN23357_c5_g1	TRINITY_DN9528_c2_g1	TRINITY_DN14920_c9_g2	TRINITY_DN15911_c0_g1	TRINITY_DN22914_c7_g9	TRINITY_DN21530_c0_g1	TRINITY_DN16920_c0_g1	TRINITY_DN39935_c0_g1	OG0000828	1	1	1	1	1	1	1	1	1	1	OG0000828	TRINITY_DN9528_c2_g1	TRINITY_DN15911_c0_g1	TRINITY_DN39935_c0_g1	TRINITY_DN22914_c7_g9	TRINITY_DN21530_c0_g1	TRINITY_DN14920_c9_g2	TRINITY_DN16920_c0_g1
OG0000829	TRINITY_DN4231_c0_g1, TRINITY_DN4805_c5_g1	TRINITY_DN18282_c3_g4, TRINITY_DN20538_c8_g3, TRINITY_DN20538_c8_g5	TRINITY_DN95_c4_g2	TRINITY_DN14814_c4_g2, TRINITY_DN19466_c5_g1	TRINITY_DN16207_c4_g1	TRINITY_DN23546_c5_g3	TRINITY_DN18252_c4_g1, TRINITY_DN21596_c8_g2	TRINITY_DN19916_c5_g2	TRINITY_DN47340_c4_g1	OG0000829	2	3	1	2	1	1	2	1	1	0	OG0000829	TRINITY_DN4231_c0_g1	TRINITY_DN20538_c8_g3	TRINITY_DN95_c4_g2	TRINITY_DN19466_c5_g1	TRINITY_DN16207_c4_g1	TRINITY_DN23546_c5_g3	TRINITY_DN21596_c8_g2	TRINITY_DN19916_c5_g2	TRINITY_DN47340_c4_g1	OG0000829	1	1	1	1	1	1	1	1	1	1	OG0000829	TRINITY_DN95_c4_g2	TRINITY_DN16207_c4_g1	TRINITY_DN47340_c4_g1	TRINITY_DN23546_c5_g3	TRINITY_DN21596_c8_g2	TRINITY_DN19466_c5_g1	TRINITY_DN19916_c5_g2
OG0000830	TRINITY_DN17042_c0_g1	TRINITY_DN22909_c5_g1	TRINITY_DN9997_c0_g2, TRINITY_DN9997_c2_g1, TRINITY_DN9997_c5_g1	TRINITY_DN20887_c8_g1		TRINITY_DN58060_c0_g1, TRINITY_DN8939_c0_g1, TRINITY_DN8939_c0_g2	TRINITY_DN13356_c0_g2, TRINITY_DN42483_c0_g1, TRINITY_DN49857_c0_g1	TRINITY_DN14223_c0_g1	TRINITY_DN74731_c0_g1	OG0000830	1	1	3	1	0	3	3	1	1	0	OG0000830	TRINITY_DN17042_c0_g1	TRINITY_DN22909_c5_g1	TRINITY_DN9997_c0_g2	TRINITY_DN20887_c8_g1		TRINITY_DN8939_c0_g2	TRINITY_DN42483_c0_g1	TRINITY_DN14223_c0_g1	TRINITY_DN74731_c0_g1	OG0000830	1	1	1	1	0	1	1	1	1	0	OG0000830	TRINITY_DN9997_c0_g2	TRINITY_UK00000_c0_g1	TRINITY_DN74731_c0_g1	TRINITY_DN8939_c0_g2	TRINITY_DN42483_c0_g1	TRINITY_DN20887_c8_g1	TRINITY_DN14223_c0_g1
OG0000831	TRINITY_DN5383_c0_g1	TRINITY_DN21354_c5_g2		TRINITY_DN15574_c2_g1	TRINITY_DN10530_c0_g1, TRINITY_DN14463_c0_g1	TRINITY_DN1048_c0_g1, TRINITY_DN26212_c0_g1, TRINITY_DN54792_c0_g1	TRINITY_DN24504_c2_g1, TRINITY_DN24504_c2_g3	TRINITY_DN13306_c0_g1, TRINITY_DN40902_c0_g1	TRINITY_DN3749_c0_g1, TRINITY_DN6443_c0_g1	OG0000831	1	1	0	1	2	3	2	2	2	0	OG0000831	TRINITY_DN5383_c0_g1	TRINITY_DN21354_c5_g2		TRINITY_DN15574_c2_g1	TRINITY_DN10530_c0_g1	TRINITY_DN1048_c0_g1	TRINITY_DN24504_c2_g3	TRINITY_DN40902_c0_g1	TRINITY_DN3749_c0_g1	OG0000831	1	1	0	1	1	1	1	1	1	0	OG0000831	TRINITY_UK00000_c0_g1	TRINITY_DN10530_c0_g1	TRINITY_DN3749_c0_g1	TRINITY_DN1048_c0_g1	TRINITY_DN24504_c2_g3	TRINITY_DN15574_c2_g1	TRINITY_DN40902_c0_g1
OG0000834		TRINITY_DN21628_c4_g1		TRINITY_DN17504_c0_g1	TRINITY_DN12769_c0_g1, TRINITY_DN12769_c0_g3, TRINITY_DN5636_c0_g2	TRINITY_DN44128_c0_g1, TRINITY_DN53829_c0_g1	TRINITY_DN12873_c0_g1, TRINITY_DN3991_c0_g1, TRINITY_DN42553_c0_g1	TRINITY_DN16683_c0_g1	TRINITY_DN32878_c0_g1, TRINITY_DN52407_c0_g1, TRINITY_DN64032_c0_g1	OG0000834	0	1	0	1	3	2	3	1	3	0	OG0000834		TRINITY_DN21628_c4_g1		TRINITY_DN17504_c0_g1	TRINITY_DN12769_c0_g1	TRINITY_DN44128_c0_g1	TRINITY_DN3991_c0_g1	TRINITY_DN16683_c0_g1	TRINITY_DN64032_c0_g1	OG0000834	0	1	0	1	1	1	1	1	1	0	OG0000834	TRINITY_UK00000_c0_g1	TRINITY_DN12769_c0_g1	TRINITY_DN64032_c0_g1	TRINITY_DN44128_c0_g1	TRINITY_DN3991_c0_g1	TRINITY_DN17504_c0_g1	TRINITY_DN16683_c0_g1
OG0000835	TRINITY_DN9543_c1_g1, TRINITY_DN9543_c2_g1	TRINITY_DN20246_c5_g2		TRINITY_DN15294_c8_g1	TRINITY_DN14854_c0_g1, TRINITY_DN14854_c0_g2, TRINITY_DN14854_c0_g3	TRINITY_DN18826_c0_g1, TRINITY_DN18826_c0_g3	TRINITY_DN17140_c0_g1	TRINITY_DN16648_c0_g2	TRINITY_DN31569_c0_g1, TRINITY_DN37167_c0_g1, TRINITY_DN37167_c0_g2	OG0000835	2	1	0	1	3	2	1	1	3	0	OG0000835	TRINITY_DN9543_c2_g1	TRINITY_DN20246_c5_g2		TRINITY_DN15294_c8_g1	TRINITY_DN14854_c0_g2	TRINITY_DN18826_c0_g1	TRINITY_DN17140_c0_g1	TRINITY_DN16648_c0_g2	TRINITY_DN37167_c0_g2	OG0000835	1	1	0	1	1	1	1	1	1	0	OG0000835	TRINITY_UK00000_c0_g1	TRINITY_DN14854_c0_g2	TRINITY_DN37167_c0_g2	TRINITY_DN18826_c0_g1	TRINITY_DN17140_c0_g1	TRINITY_DN15294_c8_g1	TRINITY_DN16648_c0_g2
OG0000838		TRINITY_DN21310_c7_g3, TRINITY_DN23343_c7_g2		TRINITY_DN14245_c9_g3	TRINITY_DN16411_c3_g4, TRINITY_DN18376_c5_g2	TRINITY_DN22909_c4_g16, TRINITY_DN22909_c4_g4, TRINITY_DN24645_c6_g1	TRINITY_DN20515_c6_g1, TRINITY_DN24977_c8_g3	TRINITY_DN20632_c6_g1, TRINITY_DN20632_c6_g10	TRINITY_DN44402_c8_g1, TRINITY_DN48587_c2_g2	OG0000838	0	2	0	1	2	3	2	2	2	0	OG0000838		TRINITY_DN21310_c7_g3		TRINITY_DN14245_c9_g3	TRINITY_DN16411_c3_g4	TRINITY_DN24645_c6_g1	TRINITY_DN24977_c8_g3	TRINITY_DN20632_c6_g1	TRINITY_DN48587_c2_g2	OG0000838	0	1	0	1	1	1	1	1	1	0	OG0000838	TRINITY_UK00000_c0_g1	TRINITY_DN16411_c3_g4	TRINITY_DN48587_c2_g2	TRINITY_DN24645_c6_g1	TRINITY_DN24977_c8_g3	TRINITY_DN14245_c9_g3	TRINITY_DN20632_c6_g1
OG0000840	TRINITY_DN3291_c8_g1, TRINITY_DN38073_c0_g1, TRINITY_DN5529_c0_g2	TRINITY_DN18589_c5_g1, TRINITY_DN21050_c7_g1		TRINITY_DN19404_c5_g1, TRINITY_DN19404_c5_g3	TRINITY_DN17267_c11_g1, TRINITY_DN18398_c5_g1	TRINITY_DN21888_c4_g2	TRINITY_DN24804_c7_g1		TRINITY_DN46703_c0_g2, TRINITY_DN46703_c0_g4, TRINITY_DN65829_c0_g1	OG0000840	3	2	0	2	2	1	1	0	3	0	OG0000840	TRINITY_DN5529_c0_g2	TRINITY_DN21050_c7_g1		TRINITY_DN19404_c5_g1	TRINITY_DN17267_c11_g1	TRINITY_DN21888_c4_g2	TRINITY_DN24804_c7_g1		TRINITY_DN46703_c0_g2	OG0000840	1	1	0	1	1	1	1	0	1	0	OG0000840	TRINITY_UK00000_c0_g1	TRINITY_DN17267_c11_g1	TRINITY_DN46703_c0_g2	TRINITY_DN21888_c4_g2	TRINITY_DN24804_c7_g1	TRINITY_DN19404_c5_g1	TRINITY_UK00000_c0_g1
OG0000841	TRINITY_DN2754_c0_g1	TRINITY_DN18752_c6_g1		TRINITY_DN20271_c7_g1, TRINITY_DN20478_c5_g3	TRINITY_DN17970_c0_g5, TRINITY_DN18786_c3_g1	TRINITY_DN23527_c3_g8, TRINITY_DN24061_c4_g2	TRINITY_DN19513_c4_g1, TRINITY_DN21611_c2_g1, TRINITY_DN23781_c5_g1	TRINITY_DN19124_c6_g3	TRINITY_DN37225_c0_g1, TRINITY_DN48959_c3_g1	OG0000841	1	1	0	2	2	2	3	1	2	0	OG0000841	TRINITY_DN2754_c0_g1	TRINITY_DN18752_c6_g1		TRINITY_DN20271_c7_g1	TRINITY_DN18786_c3_g1	TRINITY_DN23527_c3_g8	TRINITY_DN19513_c4_g1	TRINITY_DN19124_c6_g3	TRINITY_DN48959_c3_g1	OG0000841	1	1	0	1	1	1	1	1	1	0	OG0000841	TRINITY_UK00000_c0_g1	TRINITY_DN18786_c3_g1	TRINITY_DN48959_c3_g1	TRINITY_DN23527_c3_g8	TRINITY_DN19513_c4_g1	TRINITY_DN20271_c7_g1	TRINITY_DN19124_c6_g3
OG0000842	TRINITY_DN20309_c0_g1	TRINITY_DN53042_c0_g1, TRINITY_DN63053_c0_g1, TRINITY_DN65466_c0_g1		TRINITY_DN12681_c8_g1	TRINITY_DN18487_c9_g1	TRINITY_DN12022_c0_g1, TRINITY_DN43458_c0_g1	TRINITY_DN17133_c0_g1	TRINITY_DN20368_c6_g1, TRINITY_DN20368_c6_g2	TRINITY_DN10998_c0_g1, TRINITY_DN39001_c0_g1, TRINITY_DN72093_c0_g1	OG0000842	1	3	0	1	1	2	1	2	3	0	OG0000842	TRINITY_DN20309_c0_g1	TRINITY_DN63053_c0_g1		TRINITY_DN12681_c8_g1	TRINITY_DN18487_c9_g1	TRINITY_DN43458_c0_g1	TRINITY_DN17133_c0_g1	TRINITY_DN20368_c6_g1	TRINITY_DN39001_c0_g1	OG0000842	1	1	0	1	1	1	1	1	1	0	OG0000842	TRINITY_UK00000_c0_g1	TRINITY_DN18487_c9_g1	TRINITY_DN39001_c0_g1	TRINITY_DN43458_c0_g1	TRINITY_DN17133_c0_g1	TRINITY_DN12681_c8_g1	TRINITY_DN20368_c6_g1
OG0000844	TRINITY_DN351_c0_g1	TRINITY_DN19025_c4_g1, TRINITY_DN22199_c6_g4, TRINITY_DN45600_c0_g1		TRINITY_DN18911_c2_g1	TRINITY_DN18778_c1_g1	TRINITY_DN23535_c4_g1, TRINITY_DN24576_c2_g1	TRINITY_DN19119_c5_g1, TRINITY_DN21771_c4_g1	TRINITY_DN19652_c3_g2, TRINITY_DN19652_c3_g3	TRINITY_DN45464_c0_g1, TRINITY_DN47980_c1_g1	OG0000844	1	3	0	1	1	2	2	2	2	0	OG0000844	TRINITY_DN351_c0_g1	TRINITY_DN22199_c6_g4		TRINITY_DN18911_c2_g1	TRINITY_DN18778_c1_g1	TRINITY_DN24576_c2_g1	TRINITY_DN21771_c4_g1	TRINITY_DN19652_c3_g3	TRINITY_DN47980_c1_g1	OG0000844	1	1	0	1	1	1	1	1	1	0	OG0000844	TRINITY_UK00000_c0_g1	TRINITY_DN18778_c1_g1	TRINITY_DN47980_c1_g1	TRINITY_DN24576_c2_g1	TRINITY_DN21771_c4_g1	TRINITY_DN18911_c2_g1	TRINITY_DN19652_c3_g3
OG0000845		TRINITY_DN38775_c0_g1		TRINITY_DN12544_c4_g2, TRINITY_DN13484_c6_g1	TRINITY_DN18994_c5_g4	TRINITY_DN22979_c2_g3, TRINITY_DN22979_c2_g6, TRINITY_DN39275_c0_g1	TRINITY_DN19981_c3_g4, TRINITY_DN20068_c3_g2, TRINITY_DN519_c0_g1	TRINITY_DN16430_c0_g1, TRINITY_DN16430_c0_g3	TRINITY_DN40193_c0_g1, TRINITY_DN809_c0_g1	OG0000845	0	1	0	2	1	3	3	2	2	0	OG0000845		TRINITY_DN38775_c0_g1		TRINITY_DN12544_c4_g2	TRINITY_DN18994_c5_g4	TRINITY_DN22979_c2_g3	TRINITY_DN20068_c3_g2	TRINITY_DN16430_c0_g3	TRINITY_DN40193_c0_g1	OG0000845	0	1	0	1	1	1	1	1	1	0	OG0000845	TRINITY_UK00000_c0_g1	TRINITY_DN18994_c5_g4	TRINITY_DN40193_c0_g1	TRINITY_DN22979_c2_g3	TRINITY_DN20068_c3_g2	TRINITY_DN12544_c4_g2	TRINITY_DN16430_c0_g3
OG0000847	TRINITY_DN6404_c0_g2	TRINITY_DN21272_c5_g2, TRINITY_DN49699_c0_g1		TRINITY_DN16504_c3_g1, TRINITY_DN16504_c3_g3, TRINITY_DN20679_c7_g2	TRINITY_DN19213_c7_g4	TRINITY_DN22652_c8_g1, TRINITY_DN23415_c2_g4	TRINITY_DN24933_c4_g2	TRINITY_DN18170_c4_g3, TRINITY_DN20538_c3_g2	TRINITY_DN44954_c2_g1, TRINITY_DN47227_c4_g1	OG0000847	1	2	0	3	1	2	1	2	2	0	OG0000847	TRINITY_DN6404_c0_g2	TRINITY_DN21272_c5_g2		TRINITY_DN20679_c7_g2	TRINITY_DN19213_c7_g4	TRINITY_DN23415_c2_g4	TRINITY_DN24933_c4_g2	TRINITY_DN18170_c4_g3	TRINITY_DN44954_c2_g1	OG0000847	1	1	0	1	1	1	1	1	1	0	OG0000847	TRINITY_UK00000_c0_g1	TRINITY_DN19213_c7_g4	TRINITY_DN44954_c2_g1	TRINITY_DN23415_c2_g4	TRINITY_DN24933_c4_g2	TRINITY_DN20679_c7_g2	TRINITY_DN18170_c4_g3
OG0000848	TRINITY_DN5675_c2_g2	TRINITY_DN21777_c1_g1		TRINITY_DN13549_c5_g2	TRINITY_DN19599_c1_g4, TRINITY_DN98_c0_g1	TRINITY_DN19362_c0_g1, TRINITY_DN19362_c0_g2, TRINITY_DN54693_c0_g1	TRINITY_DN22800_c1_g1	TRINITY_DN24079_c0_g1, TRINITY_DN985_c0_g1	TRINITY_DN47220_c9_g1, TRINITY_DN79749_c0_g1, TRINITY_DN8759_c0_g2	OG0000848	1	1	0	1	2	3	1	2	3	0	OG0000848	TRINITY_DN5675_c2_g2	TRINITY_DN21777_c1_g1		TRINITY_DN13549_c5_g2	TRINITY_DN19599_c1_g4	TRINITY_DN54693_c0_g1	TRINITY_DN22800_c1_g1	TRINITY_DN985_c0_g1	TRINITY_DN8759_c0_g2	OG0000848	1	1	0	1	1	1	1	1	1	0	OG0000848	TRINITY_UK00000_c0_g1	TRINITY_DN19599_c1_g4	TRINITY_DN8759_c0_g2	TRINITY_DN54693_c0_g1	TRINITY_DN22800_c1_g1	TRINITY_DN13549_c5_g2	TRINITY_DN985_c0_g1
OG0000850		TRINITY_DN21641_c3_g4, TRINITY_DN23066_c4_g1, TRINITY_DN5966_c0_g1		TRINITY_DN12620_c6_g2, TRINITY_DN12620_c6_g4	TRINITY_DN19824_c11_g1, TRINITY_DN19824_c11_g2	TRINITY_DN22373_c6_g1	TRINITY_DN20352_c7_g1, TRINITY_DN20745_c2_g1, TRINITY_DN22830_c4_g4	TRINITY_DN21052_c10_g2	TRINITY_DN47078_c0_g1, TRINITY_DN48115_c6_g1	OG0000850	0	3	0	2	2	1	3	1	2	0	OG0000850		TRINITY_DN23066_c4_g1		TRINITY_DN12620_c6_g2	TRINITY_DN19824_c11_g1	TRINITY_DN22373_c6_g1	TRINITY_DN22830_c4_g4	TRINITY_DN21052_c10_g2	TRINITY_DN48115_c6_g1	OG0000850	0	1	0	1	1	1	1	1	1	0	OG0000850	TRINITY_UK00000_c0_g1	TRINITY_DN19824_c11_g1	TRINITY_DN48115_c6_g1	TRINITY_DN22373_c6_g1	TRINITY_DN22830_c4_g4	TRINITY_DN12620_c6_g2	TRINITY_DN21052_c10_g2
OG0000851	TRINITY_DN13805_c0_g1, TRINITY_DN13805_c5_g1	TRINITY_DN21564_c6_g1		TRINITY_DN15237_c2_g1	TRINITY_DN2748_c0_g1, TRINITY_DN2748_c0_g2	TRINITY_DN25149_c0_g1, TRINITY_DN6864_c0_g1	TRINITY_DN3645_c0_g1, TRINITY_DN4713_c0_g1	TRINITY_DN15530_c0_g1, TRINITY_DN41648_c0_g1	TRINITY_DN12919_c0_g1, TRINITY_DN34698_c0_g1	OG0000851	2	1	0	1	2	2	2	2	2	0	OG0000851	TRINITY_DN13805_c0_g1	TRINITY_DN21564_c6_g1		TRINITY_DN15237_c2_g1	TRINITY_DN2748_c0_g2	TRINITY_DN6864_c0_g1	TRINITY_DN3645_c0_g1	TRINITY_DN15530_c0_g1	TRINITY_DN12919_c0_g1	OG0000851	1	1	0	1	1	1	1	1	1	0	OG0000851	TRINITY_UK00000_c0_g1	TRINITY_DN2748_c0_g2	TRINITY_DN12919_c0_g1	TRINITY_DN6864_c0_g1	TRINITY_DN3645_c0_g1	TRINITY_DN15237_c2_g1	TRINITY_DN15530_c0_g1
OG0000852	TRINITY_DN20820_c0_g2, TRINITY_DN20820_c2_g1	TRINITY_DN23348_c5_g3		TRINITY_DN12140_c0_g1	TRINITY_DN29039_c0_g1, TRINITY_DN32912_c0_g1	TRINITY_DN10715_c0_g2, TRINITY_DN38532_c0_g1, TRINITY_DN5930_c0_g2	TRINITY_DN45566_c0_g1	TRINITY_DN12205_c0_g1, TRINITY_DN12205_c0_g2	TRINITY_DN30069_c0_g1, TRINITY_DN58873_c0_g1	OG0000852	2	1	0	1	2	3	1	2	2	0	OG0000852	TRINITY_DN20820_c0_g2	TRINITY_DN23348_c5_g3		TRINITY_DN12140_c0_g1	TRINITY_DN29039_c0_g1	TRINITY_DN38532_c0_g1	TRINITY_DN45566_c0_g1	TRINITY_DN12205_c0_g2	TRINITY_DN58873_c0_g1	OG0000852	1	1	0	1	1	1	1	1	1	0	OG0000852	TRINITY_UK00000_c0_g1	TRINITY_DN29039_c0_g1	TRINITY_DN58873_c0_g1	TRINITY_DN38532_c0_g1	TRINITY_DN45566_c0_g1	TRINITY_DN12140_c0_g1	TRINITY_DN12205_c0_g2
OG0000853	TRINITY_DN34070_c4_g1	TRINITY_DN21072_c4_g5, TRINITY_DN44554_c0_g1		TRINITY_DN11085_c0_g1, TRINITY_DN15395_c2_g1	TRINITY_DN36388_c0_g1, TRINITY_DN36681_c0_g1	TRINITY_DN24480_c4_g5	TRINITY_DN18991_c6_g2	TRINITY_DN11589_c0_g1, TRINITY_DN29670_c0_g1	TRINITY_DN45937_c4_g3, TRINITY_DN61296_c0_g1, TRINITY_DN84830_c0_g1	OG0000853	1	2	0	2	2	1	1	2	3	0	OG0000853	TRINITY_DN34070_c4_g1	TRINITY_DN21072_c4_g5		TRINITY_DN15395_c2_g1	TRINITY_DN36681_c0_g1	TRINITY_DN24480_c4_g5	TRINITY_DN18991_c6_g2	TRINITY_DN11589_c0_g1	TRINITY_DN84830_c0_g1	OG0000853	1	1	0	1	1	1	1	1	1	0	OG0000853	TRINITY_UK00000_c0_g1	TRINITY_DN36681_c0_g1	TRINITY_DN84830_c0_g1	TRINITY_DN24480_c4_g5	TRINITY_DN18991_c6_g2	TRINITY_DN15395_c2_g1	TRINITY_DN11589_c0_g1
OG0000857	TRINITY_DN11444_c0_g1	TRINITY_DN19516_c6_g1	TRINITY_DN10039_c9_g1, TRINITY_DN49043_c1_g1	TRINITY_DN15270_c7_g1, TRINITY_DN18096_c8_g1		TRINITY_DN24174_c8_g3	TRINITY_DN22902_c7_g3, TRINITY_DN22902_c7_g4	TRINITY_DN14319_c0_g2	TRINITY_DN33135_c0_g1, TRINITY_DN8919_c0_g1, TRINITY_DN8919_c0_g2	OG0000857	1	1	2	2	0	1	2	1	3	0	OG0000857	TRINITY_DN11444_c0_g1	TRINITY_DN19516_c6_g1	TRINITY_DN10039_c9_g1	TRINITY_DN18096_c8_g1		TRINITY_DN24174_c8_g3	TRINITY_DN22902_c7_g4	TRINITY_DN14319_c0_g2	TRINITY_DN33135_c0_g1	OG0000857	1	1	1	1	0	1	1	1	1	0	OG0000857	TRINITY_DN10039_c9_g1	TRINITY_UK00000_c0_g1	TRINITY_DN33135_c0_g1	TRINITY_DN24174_c8_g3	TRINITY_DN22902_c7_g4	TRINITY_DN18096_c8_g1	TRINITY_DN14319_c0_g2
OG0000858	TRINITY_DN1872_c0_g1	TRINITY_DN23455_c7_g2	TRINITY_DN100_c0_g2	TRINITY_DN17078_c4_g1	TRINITY_DN19127_c4_g2	TRINITY_DN22173_c4_g3, TRINITY_DN24760_c13_g1	TRINITY_DN24880_c0_g1	TRINITY_DN18413_c6_g2, TRINITY_DN21120_c3_g2	TRINITY_DN45083_c6_g1, TRINITY_DN48582_c2_g2, TRINITY_DN48582_c2_g3	OG0000858	1	1	1	1	1	2	1	2	3	0	OG0000858	TRINITY_DN1872_c0_g1	TRINITY_DN23455_c7_g2	TRINITY_DN100_c0_g2	TRINITY_DN17078_c4_g1	TRINITY_DN19127_c4_g2	TRINITY_DN22173_c4_g3	TRINITY_DN24880_c0_g1	TRINITY_DN21120_c3_g2	TRINITY_DN48582_c2_g2	OG0000858	1	1	1	1	1	1	1	1	1	1	OG0000858	TRINITY_DN100_c0_g2	TRINITY_DN19127_c4_g2	TRINITY_DN48582_c2_g2	TRINITY_DN22173_c4_g3	TRINITY_DN24880_c0_g1	TRINITY_DN17078_c4_g1	TRINITY_DN21120_c3_g2
OG0000860	TRINITY_DN927_c3_g5	TRINITY_DN21621_c4_g1	TRINITY_DN10220_c0_g2	TRINITY_DN13146_c6_g6, TRINITY_DN19994_c14_g1	TRINITY_DN17483_c7_g2	TRINITY_DN24179_c6_g3, TRINITY_DN24683_c0_g2	TRINITY_DN19109_c2_g1, TRINITY_DN19684_c3_g3	TRINITY_DN19722_c6_g1	TRINITY_DN46609_c5_g4, TRINITY_DN48260_c5_g1	OG0000860	1	1	1	2	1	2	2	1	2	0	OG0000860	TRINITY_DN927_c3_g5	TRINITY_DN21621_c4_g1	TRINITY_DN10220_c0_g2	TRINITY_DN13146_c6_g6	TRINITY_DN17483_c7_g2	TRINITY_DN24683_c0_g2	TRINITY_DN19684_c3_g3	TRINITY_DN19722_c6_g1	TRINITY_DN48260_c5_g1	OG0000860	1	1	1	1	1	1	1	1	1	1	OG0000860	TRINITY_DN10220_c0_g2	TRINITY_DN17483_c7_g2	TRINITY_DN48260_c5_g1	TRINITY_DN24683_c0_g2	TRINITY_DN19684_c3_g3	TRINITY_DN13146_c6_g6	TRINITY_DN19722_c6_g1
OG0000861	TRINITY_DN6569_c0_g1	TRINITY_DN140_c0_g1, TRINITY_DN22972_c4_g1	TRINITY_DN10306_c1_g1		TRINITY_DN15516_c0_g1	TRINITY_DN17437_c0_g1	TRINITY_DN24717_c1_g3	TRINITY_DN17808_c14_g1, TRINITY_DN17808_c1_g1, TRINITY_DN17808_c1_g2	TRINITY_DN34084_c0_g1, TRINITY_DN34084_c0_g2, TRINITY_DN62912_c0_g1	OG0000861	1	2	1	0	1	1	1	3	3	0	OG0000861	TRINITY_DN6569_c0_g1	TRINITY_DN22972_c4_g1	TRINITY_DN10306_c1_g1		TRINITY_DN15516_c0_g1	TRINITY_DN17437_c0_g1	TRINITY_DN24717_c1_g3	TRINITY_DN17808_c14_g1	TRINITY_DN34084_c0_g1	OG0000861	1	1	1	0	1	1	1	1	1	0	OG0000861	TRINITY_DN10306_c1_g1	TRINITY_DN15516_c0_g1	TRINITY_DN34084_c0_g1	TRINITY_DN17437_c0_g1	TRINITY_DN24717_c1_g3	TRINITY_UK00000_c0_g1	TRINITY_DN17808_c14_g1
OG0000862	TRINITY_DN5282_c0_g1	TRINITY_DN43579_c0_g1, TRINITY_DN51296_c0_g1	TRINITY_DN10371_c3_g1	TRINITY_DN1980_c0_g1	TRINITY_DN11413_c0_g1, TRINITY_DN11413_c0_g2	TRINITY_DN22491_c6_g1	TRINITY_DN23031_c3_g1, TRINITY_DN23031_c3_g3	TRINITY_DN45430_c0_g1, TRINITY_DN9822_c0_g1	TRINITY_DN43496_c5_g1	OG0000862	1	2	1	1	2	1	2	2	1	0	OG0000862	TRINITY_DN5282_c0_g1	TRINITY_DN51296_c0_g1	TRINITY_DN10371_c3_g1	TRINITY_DN1980_c0_g1	TRINITY_DN11413_c0_g2	TRINITY_DN22491_c6_g1	TRINITY_DN23031_c3_g1	TRINITY_DN45430_c0_g1	TRINITY_DN43496_c5_g1	OG0000862	1	1	1	1	1	1	1	1	1	1	OG0000862	TRINITY_DN10371_c3_g1	TRINITY_DN11413_c0_g2	TRINITY_DN43496_c5_g1	TRINITY_DN22491_c6_g1	TRINITY_DN23031_c3_g1	TRINITY_DN1980_c0_g1	TRINITY_DN45430_c0_g1
OG0000863	TRINITY_DN328_c0_g1	TRINITY_DN20333_c5_g1, TRINITY_DN20333_c5_g3, TRINITY_DN20752_c4_g1	TRINITY_DN103_c1_g3	TRINITY_DN13712_c5_g6, TRINITY_DN17290_c0_g1	TRINITY_DN19800_c4_g1, TRINITY_DN19800_c4_g3	TRINITY_DN22848_c5_g2	TRINITY_DN20951_c4_g1	TRINITY_DN20352_c7_g1	TRINITY_DN45745_c1_g1	OG0000863	1	3	1	2	2	1	1	1	1	0	OG0000863	TRINITY_DN328_c0_g1	TRINITY_DN20752_c4_g1	TRINITY_DN103_c1_g3	TRINITY_DN13712_c5_g6	TRINITY_DN19800_c4_g3	TRINITY_DN22848_c5_g2	TRINITY_DN20951_c4_g1	TRINITY_DN20352_c7_g1	TRINITY_DN45745_c1_g1	OG0000863	1	1	1	1	1	1	1	1	1	1	OG0000863	TRINITY_DN103_c1_g3	TRINITY_DN19800_c4_g3	TRINITY_DN45745_c1_g1	TRINITY_DN22848_c5_g2	TRINITY_DN20951_c4_g1	TRINITY_DN13712_c5_g6	TRINITY_DN20352_c7_g1
OG0000864	TRINITY_DN2963_c0_g1, TRINITY_DN844_c0_g1	TRINITY_DN21349_c9_g1	TRINITY_DN103_c2_g2, TRINITY_DN216_c0_g1	TRINITY_DN18875_c4_g1	TRINITY_DN19792_c2_g4	TRINITY_DN23285_c4_g5, TRINITY_DN24032_c8_g1		TRINITY_DN18881_c4_g4, TRINITY_DN20399_c6_g4	TRINITY_DN47404_c1_g2, TRINITY_DN48966_c1_g1	OG0000864	2	1	2	1	1	2	0	2	2	0	OG0000864	TRINITY_DN844_c0_g1	TRINITY_DN21349_c9_g1	TRINITY_DN103_c2_g2	TRINITY_DN18875_c4_g1	TRINITY_DN19792_c2_g4	TRINITY_DN24032_c8_g1		TRINITY_DN20399_c6_g4	TRINITY_DN48966_c1_g1	OG0000864	1	1	1	1	1	1	0	1	1	0	OG0000864	TRINITY_DN103_c2_g2	TRINITY_DN19792_c2_g4	TRINITY_DN48966_c1_g1	TRINITY_DN24032_c8_g1	TRINITY_UK00000_c0_g1	TRINITY_DN18875_c4_g1	TRINITY_DN20399_c6_g4
OG0000865	TRINITY_DN2010_c0_g2	TRINITY_DN19758_c12_g1, TRINITY_DN26858_c0_g1, TRINITY_DN52741_c0_g1	TRINITY_DN10450_c9_g1	TRINITY_DN10992_c0_g1, TRINITY_DN10992_c0_g2	TRINITY_DN39772_c0_g1	TRINITY_DN12206_c0_g1, TRINITY_DN12206_c0_g2	TRINITY_DN44375_c0_g1	TRINITY_DN30964_c0_g1	TRINITY_DN78749_c0_g1	OG0000865	1	3	1	2	1	2	1	1	1	0	OG0000865	TRINITY_DN2010_c0_g2	TRINITY_DN19758_c12_g1	TRINITY_DN10450_c9_g1	TRINITY_DN10992_c0_g2	TRINITY_DN39772_c0_g1	TRINITY_DN12206_c0_g2	TRINITY_DN44375_c0_g1	TRINITY_DN30964_c0_g1	TRINITY_DN78749_c0_g1	OG0000865	1	1	1	1	1	1	1	1	1	1	OG0000865	TRINITY_DN10450_c9_g1	TRINITY_DN39772_c0_g1	TRINITY_DN78749_c0_g1	TRINITY_DN12206_c0_g2	TRINITY_DN44375_c0_g1	TRINITY_DN10992_c0_g2	TRINITY_DN30964_c0_g1
OG0000866		TRINITY_DN19192_c5_g1, TRINITY_DN22466_c5_g2	TRINITY_DN104_c1_g2, TRINITY_DN46_c4_g1	TRINITY_DN20957_c2_g2	TRINITY_DN16693_c3_g1	TRINITY_DN23603_c3_g2, TRINITY_DN24583_c10_g1	TRINITY_DN18237_c9_g1, TRINITY_DN19845_c4_g2, TRINITY_DN20566_c8_g2	TRINITY_DN21269_c6_g1	TRINITY_DN46201_c8_g1	OG0000866	0	2	2	1	1	2	3	1	1	0	OG0000866		TRINITY_DN19192_c5_g1	TRINITY_DN46_c4_g1	TRINITY_DN20957_c2_g2	TRINITY_DN16693_c3_g1	TRINITY_DN23603_c3_g2	TRINITY_DN20566_c8_g2	TRINITY_DN21269_c6_g1	TRINITY_DN46201_c8_g1	OG0000866	0	1	1	1	1	1	1	1	1	0	OG0000866	TRINITY_DN46_c4_g1	TRINITY_DN16693_c3_g1	TRINITY_DN46201_c8_g1	TRINITY_DN23603_c3_g2	TRINITY_DN20566_c8_g2	TRINITY_DN20957_c2_g2	TRINITY_DN21269_c6_g1
OG0000869	TRINITY_DN2371_c3_g2	TRINITY_DN23729_c2_g1	TRINITY_DN1088_c1_g2	TRINITY_DN14180_c4_g1, TRINITY_DN14239_c8_g1, TRINITY_DN18305_c6_g1	TRINITY_DN16493_c7_g2, TRINITY_DN19038_c4_g1	TRINITY_DN24674_c3_g1	TRINITY_DN24939_c6_g1	TRINITY_DN18437_c2_g1, TRINITY_DN21194_c9_g2	TRINITY_DN48822_c0_g1	OG0000869	1	1	1	3	2	1	1	2	1	0	OG0000869	TRINITY_DN2371_c3_g2	TRINITY_DN23729_c2_g1	TRINITY_DN1088_c1_g2	TRINITY_DN14180_c4_g1	TRINITY_DN16493_c7_g2	TRINITY_DN24674_c3_g1	TRINITY_DN24939_c6_g1	TRINITY_DN18437_c2_g1	TRINITY_DN48822_c0_g1	OG0000869	1	1	1	1	1	1	1	1	1	1	OG0000869	TRINITY_DN1088_c1_g2	TRINITY_DN16493_c7_g2	TRINITY_DN48822_c0_g1	TRINITY_DN24674_c3_g1	TRINITY_DN24939_c6_g1	TRINITY_DN14180_c4_g1	TRINITY_DN18437_c2_g1
OG0000870	TRINITY_DN6022_c1_g2	TRINITY_DN22675_c9_g2	TRINITY_DN11117_c0_g1	TRINITY_DN10258_c0_g1, TRINITY_DN10258_c0_g2	TRINITY_DN37544_c0_g1, TRINITY_DN44658_c0_g1	TRINITY_DN29203_c0_g1	TRINITY_DN15863_c0_g1	TRINITY_DN35428_c0_g1, TRINITY_DN5578_c0_g1, TRINITY_DN5578_c0_g2	TRINITY_DN53006_c0_g1	OG0000870	1	1	1	2	2	1	1	3	1	0	OG0000870	TRINITY_DN6022_c1_g2	TRINITY_DN22675_c9_g2	TRINITY_DN11117_c0_g1	TRINITY_DN10258_c0_g2	TRINITY_DN44658_c0_g1	TRINITY_DN29203_c0_g1	TRINITY_DN15863_c0_g1	TRINITY_DN35428_c0_g1	TRINITY_DN53006_c0_g1	OG0000870	1	1	1	1	1	1	1	1	1	1	OG0000870	TRINITY_DN11117_c0_g1	TRINITY_DN44658_c0_g1	TRINITY_DN53006_c0_g1	TRINITY_DN29203_c0_g1	TRINITY_DN15863_c0_g1	TRINITY_DN10258_c0_g2	TRINITY_DN35428_c0_g1
OG0000871	TRINITY_DN353_c0_g1	TRINITY_DN29638_c0_g1, TRINITY_DN30535_c0_g1, TRINITY_DN58436_c0_g1	TRINITY_DN1128_c2_g2	TRINITY_DN13102_c2_g1, TRINITY_DN20465_c13_g1	TRINITY_DN17014_c8_g1	TRINITY_DN24597_c4_g1	TRINITY_DN20654_c4_g1	TRINITY_DN17856_c0_g2	TRINITY_DN48529_c0_g2, TRINITY_DN48529_c0_g3	OG0000871	1	3	1	2	1	1	1	1	2	0	OG0000871	TRINITY_DN353_c0_g1	TRINITY_DN58436_c0_g1	TRINITY_DN1128_c2_g2	TRINITY_DN13102_c2_g1	TRINITY_DN17014_c8_g1	TRINITY_DN24597_c4_g1	TRINITY_DN20654_c4_g1	TRINITY_DN17856_c0_g2	TRINITY_DN48529_c0_g2	OG0000871	1	1	1	1	1	1	1	1	1	1	OG0000871	TRINITY_DN1128_c2_g2	TRINITY_DN17014_c8_g1	TRINITY_DN48529_c0_g2	TRINITY_DN24597_c4_g1	TRINITY_DN20654_c4_g1	TRINITY_DN13102_c2_g1	TRINITY_DN17856_c0_g2
OG0000873	TRINITY_DN5183_c0_g2	TRINITY_DN22024_c3_g2	TRINITY_DN1154_c4_g1, TRINITY_DN1299_c1_g1	TRINITY_DN17654_c7_g1, TRINITY_DN20520_c2_g1	TRINITY_DN19779_c4_g2, TRINITY_DN19779_c4_g6	TRINITY_DN24878_c5_g10, TRINITY_DN24878_c5_g2	TRINITY_DN21498_c1_g1	TRINITY_DN20289_c4_g3	TRINITY_DN43936_c0_g1	OG0000873	1	1	2	2	2	2	1	1	1	0	OG0000873	TRINITY_DN5183_c0_g2	TRINITY_DN22024_c3_g2	TRINITY_DN1154_c4_g1	TRINITY_DN20520_c2_g1	TRINITY_DN19779_c4_g2	TRINITY_DN24878_c5_g10	TRINITY_DN21498_c1_g1	TRINITY_DN20289_c4_g3	TRINITY_DN43936_c0_g1	OG0000873	1	1	1	1	1	1	1	1	1	1	OG0000873	TRINITY_DN1154_c4_g1	TRINITY_DN19779_c4_g2	TRINITY_DN43936_c0_g1	TRINITY_DN24878_c5_g10	TRINITY_DN21498_c1_g1	TRINITY_DN20520_c2_g1	TRINITY_DN20289_c4_g3
OG0000874	TRINITY_DN8197_c0_g1	TRINITY_DN19193_c0_g1	TRINITY_DN11553_c3_g1	TRINITY_DN20246_c4_g1	TRINITY_DN18663_c5_g2	TRINITY_DN16297_c0_g1, TRINITY_DN16297_c0_g2, TRINITY_DN7764_c0_g1	TRINITY_DN20212_c2_g1	TRINITY_DN15904_c0_g1, TRINITY_DN43091_c0_g1, TRINITY_DN46023_c0_g1	TRINITY_DN40853_c1_g1	OG0000874	1	1	1	1	1	3	1	3	1	0	OG0000874	TRINITY_DN8197_c0_g1	TRINITY_DN19193_c0_g1	TRINITY_DN11553_c3_g1	TRINITY_DN20246_c4_g1	TRINITY_DN18663_c5_g2	TRINITY_DN7764_c0_g1	TRINITY_DN20212_c2_g1	TRINITY_DN46023_c0_g1	TRINITY_DN40853_c1_g1	OG0000874	1	1	1	1	1	1	1	1	1	1	OG0000874	TRINITY_DN11553_c3_g1	TRINITY_DN18663_c5_g2	TRINITY_DN40853_c1_g1	TRINITY_DN7764_c0_g1	TRINITY_DN20212_c2_g1	TRINITY_DN20246_c4_g1	TRINITY_DN46023_c0_g1
OG0000875		TRINITY_DN21618_c5_g1, TRINITY_DN41081_c0_g1	TRINITY_DN1164_c0_g1	TRINITY_DN13282_c7_g2, TRINITY_DN15044_c3_g2	TRINITY_DN19148_c1_g1	TRINITY_DN24624_c6_g1, TRINITY_DN24624_c6_g3	TRINITY_DN21721_c4_g1	TRINITY_DN19311_c11_g2, TRINITY_DN19311_c11_g7	TRINITY_DN45626_c0_g1, TRINITY_DN45626_c0_g2	OG0000875	0	2	1	2	1	2	1	2	2	0	OG0000875		TRINITY_DN21618_c5_g1	TRINITY_DN1164_c0_g1	TRINITY_DN15044_c3_g2	TRINITY_DN19148_c1_g1	TRINITY_DN24624_c6_g1	TRINITY_DN21721_c4_g1	TRINITY_DN19311_c11_g2	TRINITY_DN45626_c0_g1	OG0000875	0	1	1	1	1	1	1	1	1	0	OG0000875	TRINITY_DN1164_c0_g1	TRINITY_DN19148_c1_g1	TRINITY_DN45626_c0_g1	TRINITY_DN24624_c6_g1	TRINITY_DN21721_c4_g1	TRINITY_DN15044_c3_g2	TRINITY_DN19311_c11_g2
OG0000876	TRINITY_DN1381_c1_g1	TRINITY_DN20259_c2_g1	TRINITY_DN116_c2_g2	TRINITY_DN13507_c3_g2	TRINITY_DN17328_c5_g1, TRINITY_DN17348_c1_g1	TRINITY_DN24272_c0_g1	TRINITY_DN23812_c1_g1, TRINITY_DN24599_c2_g3	TRINITY_DN19883_c2_g1, TRINITY_DN20059_c3_g1	TRINITY_DN47824_c3_g1, TRINITY_DN47824_c3_g2	OG0000876	1	1	1	1	2	1	2	2	2	0	OG0000876	TRINITY_DN1381_c1_g1	TRINITY_DN20259_c2_g1	TRINITY_DN116_c2_g2	TRINITY_DN13507_c3_g2	TRINITY_DN17348_c1_g1	TRINITY_DN24272_c0_g1	TRINITY_DN23812_c1_g1	TRINITY_DN19883_c2_g1	TRINITY_DN47824_c3_g2	OG0000876	1	1	1	1	1	1	1	1	1	1	OG0000876	TRINITY_DN116_c2_g2	TRINITY_DN17348_c1_g1	TRINITY_DN47824_c3_g2	TRINITY_DN24272_c0_g1	TRINITY_DN23812_c1_g1	TRINITY_DN13507_c3_g2	TRINITY_DN19883_c2_g1
OG0000877		TRINITY_DN12896_c0_g1	TRINITY_DN11833_c7_g1	TRINITY_DN8824_c0_g1	TRINITY_DN32891_c0_g1	TRINITY_DN19849_c0_g1, TRINITY_DN19849_c0_g2, TRINITY_DN19849_c0_g4		TRINITY_DN15814_c0_g3, TRINITY_DN5756_c0_g1, TRINITY_DN7816_c0_g1	TRINITY_DN10624_c0_g1, TRINITY_DN32814_c0_g1, TRINITY_DN49096_c0_g1	OG0000877	0	1	1	1	1	3	0	3	3	0	OG0000877		TRINITY_DN12896_c0_g1	TRINITY_DN11833_c7_g1	TRINITY_DN8824_c0_g1	TRINITY_DN32891_c0_g1	TRINITY_DN19849_c0_g4		TRINITY_DN5756_c0_g1	TRINITY_DN49096_c0_g1	OG0000877	0	1	1	1	1	1	0	1	1	0	OG0000877	TRINITY_DN11833_c7_g1	TRINITY_DN32891_c0_g1	TRINITY_DN49096_c0_g1	TRINITY_DN19849_c0_g4	TRINITY_UK00000_c0_g1	TRINITY_DN8824_c0_g1	TRINITY_DN5756_c0_g1
OG0000878	TRINITY_DN3650_c2_g1	TRINITY_DN21961_c5_g1	TRINITY_DN121_c0_g2	TRINITY_DN18999_c7_g1, TRINITY_DN18999_c7_g2, TRINITY_DN18999_c7_g3	TRINITY_DN19304_c9_g1	TRINITY_DN24030_c2_g1	TRINITY_DN23615_c3_g2	TRINITY_DN20385_c4_g2, TRINITY_DN21085_c9_g1	TRINITY_DN36827_c0_g1, TRINITY_DN48942_c3_g1	OG0000878	1	1	1	3	1	1	1	2	2	0	OG0000878	TRINITY_DN3650_c2_g1	TRINITY_DN21961_c5_g1	TRINITY_DN121_c0_g2	TRINITY_DN18999_c7_g1	TRINITY_DN19304_c9_g1	TRINITY_DN24030_c2_g1	TRINITY_DN23615_c3_g2	TRINITY_DN20385_c4_g2	TRINITY_DN36827_c0_g1	OG0000878	1	1	1	1	1	1	1	1	1	1	OG0000878	TRINITY_DN121_c0_g2	TRINITY_DN19304_c9_g1	TRINITY_DN36827_c0_g1	TRINITY_DN24030_c2_g1	TRINITY_DN23615_c3_g2	TRINITY_DN18999_c7_g1	TRINITY_DN20385_c4_g2
OG0000879	TRINITY_DN3891_c0_g1	TRINITY_DN21207_c11_g1, TRINITY_DN22308_c1_g2	TRINITY_DN1224_c1_g2	TRINITY_DN14666_c8_g2	TRINITY_DN18911_c5_g3, TRINITY_DN18911_c5_g4	TRINITY_DN24005_c6_g3, TRINITY_DN24005_c6_g7	TRINITY_DN20402_c4_g1	TRINITY_DN19042_c3_g6, TRINITY_DN19684_c8_g1	TRINITY_DN47978_c6_g1	OG0000879	1	2	1	1	2	2	1	2	1	0	OG0000879	TRINITY_DN3891_c0_g1	TRINITY_DN22308_c1_g2	TRINITY_DN1224_c1_g2	TRINITY_DN14666_c8_g2	TRINITY_DN18911_c5_g3	TRINITY_DN24005_c6_g3	TRINITY_DN20402_c4_g1	TRINITY_DN19684_c8_g1	TRINITY_DN47978_c6_g1	OG0000879	1	1	1	1	1	1	1	1	1	1	OG0000879	TRINITY_DN1224_c1_g2	TRINITY_DN18911_c5_g3	TRINITY_DN47978_c6_g1	TRINITY_DN24005_c6_g3	TRINITY_DN20402_c4_g1	TRINITY_DN14666_c8_g2	TRINITY_DN19684_c8_g1
OG0000880	TRINITY_DN699_c0_g1, TRINITY_DN699_c0_g4	TRINITY_DN19468_c9_g1	TRINITY_DN1226_c0_g1	TRINITY_DN17625_c6_g1	TRINITY_DN16993_c3_g1	TRINITY_DN22972_c9_g1, TRINITY_DN22972_c9_g2	TRINITY_DN22415_c0_g1	TRINITY_DN18214_c7_g1	TRINITY_DN39737_c0_g1, TRINITY_DN40468_c0_g1, TRINITY_DN63674_c0_g1	OG0000880	2	1	1	1	1	2	1	1	3	0	OG0000880	TRINITY_DN699_c0_g4	TRINITY_DN19468_c9_g1	TRINITY_DN1226_c0_g1	TRINITY_DN17625_c6_g1	TRINITY_DN16993_c3_g1	TRINITY_DN22972_c9_g1	TRINITY_DN22415_c0_g1	TRINITY_DN18214_c7_g1	TRINITY_DN63674_c0_g1	OG0000880	1	1	1	1	1	1	1	1	1	1	OG0000880	TRINITY_DN1226_c0_g1	TRINITY_DN16993_c3_g1	TRINITY_DN63674_c0_g1	TRINITY_DN22972_c9_g1	TRINITY_DN22415_c0_g1	TRINITY_DN17625_c6_g1	TRINITY_DN18214_c7_g1
OG0000882	TRINITY_DN1696_c1_g2, TRINITY_DN260_c0_g3	TRINITY_DN21228_c0_g2, TRINITY_DN22995_c4_g1	TRINITY_DN12838_c1_g1, TRINITY_DN7606_c1_g4	TRINITY_DN17374_c3_g1, TRINITY_DN20060_c0_g2	TRINITY_DN17784_c5_g1	TRINITY_DN20049_c0_g1	TRINITY_DN23359_c4_g1	TRINITY_DN14046_c0_g1	TRINITY_DN45073_c4_g2	OG0000882	2	2	2	2	1	1	1	1	1	0	OG0000882	TRINITY_DN260_c0_g3	TRINITY_DN21228_c0_g2	TRINITY_DN7606_c1_g4	TRINITY_DN20060_c0_g2	TRINITY_DN17784_c5_g1	TRINITY_DN20049_c0_g1	TRINITY_DN23359_c4_g1	TRINITY_DN14046_c0_g1	TRINITY_DN45073_c4_g2	OG0000882	1	1	1	1	1	1	1	1	1	1	OG0000882	TRINITY_DN7606_c1_g4	TRINITY_DN17784_c5_g1	TRINITY_DN45073_c4_g2	TRINITY_DN20049_c0_g1	TRINITY_DN23359_c4_g1	TRINITY_DN20060_c0_g2	TRINITY_DN14046_c0_g1
OG0000884	TRINITY_DN2397_c0_g1	TRINITY_DN23486_c6_g1, TRINITY_DN23818_c6_g4, TRINITY_DN57432_c0_g1	TRINITY_DN1321_c2_g1	TRINITY_DN14989_c4_g1	TRINITY_DN18837_c3_g1, TRINITY_DN18837_c3_g4	TRINITY_DN24223_c5_g1	TRINITY_DN20669_c2_g4, TRINITY_DN25339_c10_g1	TRINITY_DN21235_c5_g2	TRINITY_DN48587_c2_g1	OG0000884	1	3	1	1	2	1	2	1	1	0	OG0000884	TRINITY_DN2397_c0_g1	TRINITY_DN23486_c6_g1	TRINITY_DN1321_c2_g1	TRINITY_DN14989_c4_g1	TRINITY_DN18837_c3_g1	TRINITY_DN24223_c5_g1	TRINITY_DN20669_c2_g4	TRINITY_DN21235_c5_g2	TRINITY_DN48587_c2_g1	OG0000884	1	1	1	1	1	1	1	1	1	1	OG0000884	TRINITY_DN1321_c2_g1	TRINITY_DN18837_c3_g1	TRINITY_DN48587_c2_g1	TRINITY_DN24223_c5_g1	TRINITY_DN20669_c2_g4	TRINITY_DN14989_c4_g1	TRINITY_DN21235_c5_g2
OG0000885	TRINITY_DN4105_c0_g1	TRINITY_DN20571_c8_g1, TRINITY_DN23586_c3_g1	TRINITY_DN1339_c5_g3	TRINITY_DN18349_c7_g1, TRINITY_DN21193_c7_g1	TRINITY_DN17367_c5_g1, TRINITY_DN19071_c3_g2	TRINITY_DN24284_c1_g2	TRINITY_DN24783_c3_g1, TRINITY_DN24783_c3_g2	TRINITY_DN21125_c0_g2	TRINITY_DN48968_c3_g1	OG0000885	1	2	1	2	2	1	2	1	1	0	OG0000885	TRINITY_DN4105_c0_g1	TRINITY_DN23586_c3_g1	TRINITY_DN1339_c5_g3	TRINITY_DN21193_c7_g1	TRINITY_DN17367_c5_g1	TRINITY_DN24284_c1_g2	TRINITY_DN24783_c3_g2	TRINITY_DN21125_c0_g2	TRINITY_DN48968_c3_g1	OG0000885	1	1	1	1	1	1	1	1	1	1	OG0000885	TRINITY_DN1339_c5_g3	TRINITY_DN17367_c5_g1	TRINITY_DN48968_c3_g1	TRINITY_DN24284_c1_g2	TRINITY_DN24783_c3_g2	TRINITY_DN21193_c7_g1	TRINITY_DN21125_c0_g2
OG0000886		TRINITY_DN20151_c3_g2, TRINITY_DN27053_c0_g1	TRINITY_DN133_c0_g2	TRINITY_DN19824_c1_g1	TRINITY_DN19758_c3_g1, TRINITY_DN19777_c6_g1	TRINITY_DN24858_c10_g1	TRINITY_DN22751_c1_g1, TRINITY_DN23026_c0_g1	TRINITY_DN21319_c5_g1	TRINITY_DN41886_c3_g1, TRINITY_DN48772_c1_g1, TRINITY_DN48772_c2_g1	OG0000886	0	2	1	1	2	1	2	1	3	0	OG0000886		TRINITY_DN20151_c3_g2	TRINITY_DN133_c0_g2	TRINITY_DN19824_c1_g1	TRINITY_DN19758_c3_g1	TRINITY_DN24858_c10_g1	TRINITY_DN23026_c0_g1	TRINITY_DN21319_c5_g1	TRINITY_DN48772_c1_g1	OG0000886	0	1	1	1	1	1	1	1	1	0	OG0000886	TRINITY_DN133_c0_g2	TRINITY_DN19758_c3_g1	TRINITY_DN48772_c1_g1	TRINITY_DN24858_c10_g1	TRINITY_DN23026_c0_g1	TRINITY_DN19824_c1_g1	TRINITY_DN21319_c5_g1
OG0000887	TRINITY_DN29780_c8_g1	TRINITY_DN50879_c0_g1	TRINITY_DN14050_c4_g1	TRINITY_DN11483_c0_g1	TRINITY_DN14712_c0_g2, TRINITY_DN19695_c2_g1	TRINITY_DN37136_c0_g1, TRINITY_DN52549_c0_g1, TRINITY_DN54980_c0_g1	TRINITY_DN23739_c2_g2	TRINITY_DN18623_c6_g5	TRINITY_DN38849_c0_g1, TRINITY_DN45398_c0_g2	OG0000887	1	1	1	1	2	3	1	1	2	0	OG0000887	TRINITY_DN29780_c8_g1	TRINITY_DN50879_c0_g1	TRINITY_DN14050_c4_g1	TRINITY_DN11483_c0_g1	TRINITY_DN14712_c0_g2	TRINITY_DN54980_c0_g1	TRINITY_DN23739_c2_g2	TRINITY_DN18623_c6_g5	TRINITY_DN38849_c0_g1	OG0000887	1	1	1	1	1	1	1	1	1	1	OG0000887	TRINITY_DN14050_c4_g1	TRINITY_DN14712_c0_g2	TRINITY_DN38849_c0_g1	TRINITY_DN54980_c0_g1	TRINITY_DN23739_c2_g2	TRINITY_DN11483_c0_g1	TRINITY_DN18623_c6_g5
OG0000888	TRINITY_DN8156_c1_g2		TRINITY_DN14298_c2_g1	TRINITY_DN19790_c8_g3	TRINITY_DN6732_c0_g1	TRINITY_DN38737_c0_g1, TRINITY_DN8382_c0_g1	TRINITY_DN11321_c0_g1, TRINITY_DN11321_c0_g2	TRINITY_DN35228_c0_g1, TRINITY_DN4460_c0_g1	TRINITY_DN4510_c0_g1, TRINITY_DN64050_c0_g1, TRINITY_DN73434_c0_g1	OG0000888	1	0	1	1	1	2	2	2	3	0	OG0000888	TRINITY_DN8156_c1_g2		TRINITY_DN14298_c2_g1	TRINITY_DN19790_c8_g3	TRINITY_DN6732_c0_g1	TRINITY_DN38737_c0_g1	TRINITY_DN11321_c0_g2	TRINITY_DN35228_c0_g1	TRINITY_DN4510_c0_g1	OG0000888	1	0	1	1	1	1	1	1	1	0	OG0000888	TRINITY_DN14298_c2_g1	TRINITY_DN6732_c0_g1	TRINITY_DN4510_c0_g1	TRINITY_DN38737_c0_g1	TRINITY_DN11321_c0_g2	TRINITY_DN19790_c8_g3	TRINITY_DN35228_c0_g1
OG0000889	TRINITY_DN4150_c1_g3	TRINITY_DN21120_c4_g2	TRINITY_DN14303_c2_g1	TRINITY_DN11768_c0_g1	TRINITY_DN17403_c1_g1, TRINITY_DN17403_c1_g2	TRINITY_DN18012_c0_g1	TRINITY_DN20851_c5_g1, TRINITY_DN20851_c5_g4	TRINITY_DN46394_c0_g1, TRINITY_DN5082_c0_g1	TRINITY_DN24543_c0_g1, TRINITY_DN96733_c0_g1	OG0000889	1	1	1	1	2	1	2	2	2	0	OG0000889	TRINITY_DN4150_c1_g3	TRINITY_DN21120_c4_g2	TRINITY_DN14303_c2_g1	TRINITY_DN11768_c0_g1	TRINITY_DN17403_c1_g1	TRINITY_DN18012_c0_g1	TRINITY_DN20851_c5_g4	TRINITY_DN46394_c0_g1	TRINITY_DN96733_c0_g1	OG0000889	1	1	1	1	1	1	1	1	1	1	OG0000889	TRINITY_DN14303_c2_g1	TRINITY_DN17403_c1_g1	TRINITY_DN96733_c0_g1	TRINITY_DN18012_c0_g1	TRINITY_DN20851_c5_g4	TRINITY_DN11768_c0_g1	TRINITY_DN46394_c0_g1
OG0000890	TRINITY_DN3264_c2_g2	TRINITY_DN22043_c4_g2, TRINITY_DN22043_c4_g3, TRINITY_DN22043_c4_g4	TRINITY_DN1452_c0_g1	TRINITY_DN1451_c0_g1, TRINITY_DN18202_c5_g1	TRINITY_DN17917_c9_g1	TRINITY_DN24412_c4_g1	TRINITY_DN24985_c6_g1	TRINITY_DN20302_c1_g1	TRINITY_DN48415_c0_g1, TRINITY_DN48415_c0_g2	OG0000890	1	3	1	2	1	1	1	1	2	0	OG0000890	TRINITY_DN3264_c2_g2	TRINITY_DN22043_c4_g2	TRINITY_DN1452_c0_g1	TRINITY_DN18202_c5_g1	TRINITY_DN17917_c9_g1	TRINITY_DN24412_c4_g1	TRINITY_DN24985_c6_g1	TRINITY_DN20302_c1_g1	TRINITY_DN48415_c0_g2	OG0000890	1	1	1	1	1	1	1	1	1	1	OG0000890	TRINITY_DN1452_c0_g1	TRINITY_DN17917_c9_g1	TRINITY_DN48415_c0_g2	TRINITY_DN24412_c4_g1	TRINITY_DN24985_c6_g1	TRINITY_DN18202_c5_g1	TRINITY_DN20302_c1_g1
OG0000892	TRINITY_DN2882_c0_g2	TRINITY_DN21698_c6_g1, TRINITY_DN22076_c5_g1	TRINITY_DN1479_c0_g1	TRINITY_DN19274_c1_g1, TRINITY_DN20586_c9_g1	TRINITY_DN18280_c0_g1	TRINITY_DN24269_c4_g1	TRINITY_DN21208_c2_g2, TRINITY_DN24527_c7_g1	TRINITY_DN17886_c7_g1	TRINITY_DN47085_c0_g1, TRINITY_DN47511_c1_g1	OG0000892	1	2	1	2	1	1	2	1	2	0	OG0000892	TRINITY_DN2882_c0_g2	TRINITY_DN22076_c5_g1	TRINITY_DN1479_c0_g1	TRINITY_DN19274_c1_g1	TRINITY_DN18280_c0_g1	TRINITY_DN24269_c4_g1	TRINITY_DN21208_c2_g2	TRINITY_DN17886_c7_g1	TRINITY_DN47511_c1_g1	OG0000892	1	1	1	1	1	1	1	1	1	1	OG0000892	TRINITY_DN1479_c0_g1	TRINITY_DN18280_c0_g1	TRINITY_DN47511_c1_g1	TRINITY_DN24269_c4_g1	TRINITY_DN21208_c2_g2	TRINITY_DN19274_c1_g1	TRINITY_DN17886_c7_g1
OG0000893	TRINITY_DN6150_c0_g1	TRINITY_DN18743_c1_g1	TRINITY_DN1479_c1_g1, TRINITY_DN15334_c2_g1	TRINITY_DN18509_c2_g1	TRINITY_DN15480_c0_g1	TRINITY_DN23035_c3_g1, TRINITY_DN23035_c3_g4	TRINITY_DN21420_c1_g1, TRINITY_DN21420_c1_g2	TRINITY_DN16267_c0_g2	TRINITY_DN43364_c0_g1, TRINITY_DN43972_c4_g2	OG0000893	1	1	2	1	1	2	2	1	2	0	OG0000893	TRINITY_DN6150_c0_g1	TRINITY_DN18743_c1_g1	TRINITY_DN1479_c1_g1	TRINITY_DN18509_c2_g1	TRINITY_DN15480_c0_g1	TRINITY_DN23035_c3_g1	TRINITY_DN21420_c1_g1	TRINITY_DN16267_c0_g2	TRINITY_DN43364_c0_g1	OG0000893	1	1	1	1	1	1	1	1	1	1	OG0000893	TRINITY_DN1479_c1_g1	TRINITY_DN15480_c0_g1	TRINITY_DN43364_c0_g1	TRINITY_DN23035_c3_g1	TRINITY_DN21420_c1_g1	TRINITY_DN18509_c2_g1	TRINITY_DN16267_c0_g2
OG0000894	TRINITY_DN3831_c0_g1	TRINITY_DN19172_c4_g1	TRINITY_DN149_c0_g2	TRINITY_DN15805_c5_g1, TRINITY_DN21122_c8_g3	TRINITY_DN17223_c4_g3	TRINITY_DN23888_c5_g1	TRINITY_DN23780_c6_g1, TRINITY_DN23836_c5_g1	TRINITY_DN18920_c3_g12, TRINITY_DN18920_c3_g2	TRINITY_DN45382_c2_g4, TRINITY_DN48157_c2_g1	OG0000894	1	1	1	2	1	1	2	2	2	0	OG0000894	TRINITY_DN3831_c0_g1	TRINITY_DN19172_c4_g1	TRINITY_DN149_c0_g2	TRINITY_DN21122_c8_g3	TRINITY_DN17223_c4_g3	TRINITY_DN23888_c5_g1	TRINITY_DN23780_c6_g1	TRINITY_DN18920_c3_g2	TRINITY_DN48157_c2_g1	OG0000894	1	1	1	1	1	1	1	1	1	1	OG0000894	TRINITY_DN149_c0_g2	TRINITY_DN17223_c4_g3	TRINITY_DN48157_c2_g1	TRINITY_DN23888_c5_g1	TRINITY_DN23780_c6_g1	TRINITY_DN21122_c8_g3	TRINITY_DN18920_c3_g2
OG0000895	TRINITY_DN1166_c3_g1, TRINITY_DN788_c1_g1	TRINITY_DN20440_c14_g1, TRINITY_DN23872_c11_g2	TRINITY_DN149_c4_g2	TRINITY_DN17206_c3_g1, TRINITY_DN20639_c11_g1	TRINITY_DN19327_c6_g1	TRINITY_DN23776_c5_g1	TRINITY_DN19922_c6_g1	TRINITY_DN19462_c4_g1	TRINITY_DN43508_c5_g1, TRINITY_DN46833_c4_g1	OG0000895	2	2	1	2	1	1	1	1	2	0	OG0000895	TRINITY_DN788_c1_g1	TRINITY_DN23872_c11_g2	TRINITY_DN149_c4_g2	TRINITY_DN20639_c11_g1	TRINITY_DN19327_c6_g1	TRINITY_DN23776_c5_g1	TRINITY_DN19922_c6_g1	TRINITY_DN19462_c4_g1	TRINITY_DN43508_c5_g1	OG0000895	1	1	1	1	1	1	1	1	1	1	OG0000895	TRINITY_DN149_c4_g2	TRINITY_DN19327_c6_g1	TRINITY_DN43508_c5_g1	TRINITY_DN23776_c5_g1	TRINITY_DN19922_c6_g1	TRINITY_DN20639_c11_g1	TRINITY_DN19462_c4_g1
OG0000896	TRINITY_DN1090_c0_g2	TRINITY_DN20793_c1_g1, TRINITY_DN9004_c0_g1	TRINITY_DN1521_c0_g1	TRINITY_DN18350_c0_g2	TRINITY_DN17036_c3_g1, TRINITY_DN39568_c0_g1, TRINITY_DN40735_c0_g1	TRINITY_DN19761_c0_g2, TRINITY_DN23517_c4_g2	TRINITY_DN23673_c1_g3	TRINITY_DN17430_c0_g1	TRINITY_DN45232_c0_g1	OG0000896	1	2	1	1	3	2	1	1	1	0	OG0000896	TRINITY_DN1090_c0_g2	TRINITY_DN20793_c1_g1	TRINITY_DN1521_c0_g1	TRINITY_DN18350_c0_g2	TRINITY_DN17036_c3_g1	TRINITY_DN23517_c4_g2	TRINITY_DN23673_c1_g3	TRINITY_DN17430_c0_g1	TRINITY_DN45232_c0_g1	OG0000896	1	1	1	1	1	1	1	1	1	1	OG0000896	TRINITY_DN1521_c0_g1	TRINITY_DN17036_c3_g1	TRINITY_DN45232_c0_g1	TRINITY_DN23517_c4_g2	TRINITY_DN23673_c1_g3	TRINITY_DN18350_c0_g2	TRINITY_DN17430_c0_g1
OG0000897	TRINITY_DN7687_c2_g2	TRINITY_DN38174_c0_g1, TRINITY_DN46597_c0_g1, TRINITY_DN48955_c0_g1	TRINITY_DN1558_c3_g1	TRINITY_DN20207_c7_g2, TRINITY_DN20207_c7_g6	TRINITY_DN19523_c5_g1	TRINITY_DN24423_c8_g4	TRINITY_DN21856_c5_g3	TRINITY_DN18975_c13_g3	TRINITY_DN41823_c8_g1, TRINITY_DN45984_c3_g3	OG0000897	1	3	1	2	1	1	1	1	2	0	OG0000897	TRINITY_DN7687_c2_g2	TRINITY_DN38174_c0_g1	TRINITY_DN1558_c3_g1	TRINITY_DN20207_c7_g6	TRINITY_DN19523_c5_g1	TRINITY_DN24423_c8_g4	TRINITY_DN21856_c5_g3	TRINITY_DN18975_c13_g3	TRINITY_DN45984_c3_g3	OG0000897	1	1	1	1	1	1	1	1	1	1	OG0000897	TRINITY_DN1558_c3_g1	TRINITY_DN19523_c5_g1	TRINITY_DN45984_c3_g3	TRINITY_DN24423_c8_g4	TRINITY_DN21856_c5_g3	TRINITY_DN20207_c7_g6	TRINITY_DN18975_c13_g3
OG0000898	TRINITY_DN2379_c12_g1, TRINITY_DN2379_c12_g2	TRINITY_DN18399_c4_g1, TRINITY_DN18399_c4_g2	TRINITY_DN1583_c0_g1	TRINITY_DN13469_c1_g1	TRINITY_DN19442_c5_g1	TRINITY_DN23095_c3_g2	TRINITY_DN22756_c3_g1, TRINITY_DN22758_c4_g3	TRINITY_DN20541_c7_g1	TRINITY_DN45541_c3_g1, TRINITY_DN45541_c3_g3	OG0000898	2	2	1	1	1	1	2	1	2	0	OG0000898	TRINITY_DN2379_c12_g1	TRINITY_DN18399_c4_g2	TRINITY_DN1583_c0_g1	TRINITY_DN13469_c1_g1	TRINITY_DN19442_c5_g1	TRINITY_DN23095_c3_g2	TRINITY_DN22758_c4_g3	TRINITY_DN20541_c7_g1	TRINITY_DN45541_c3_g3	OG0000898	1	1	1	1	1	1	1	1	1	1	OG0000898	TRINITY_DN1583_c0_g1	TRINITY_DN19442_c5_g1	TRINITY_DN45541_c3_g3	TRINITY_DN23095_c3_g2	TRINITY_DN22758_c4_g3	TRINITY_DN13469_c1_g1	TRINITY_DN20541_c7_g1
OG0000900	TRINITY_DN3679_c0_g1	TRINITY_DN21914_c5_g1, TRINITY_DN21914_c5_g2	TRINITY_DN16515_c2_g1	TRINITY_DN22896_c0_g1, TRINITY_DN28350_c0_g1	TRINITY_DN17584_c11_g2, TRINITY_DN2898_c0_g1	TRINITY_DN21771_c1_g2	TRINITY_DN41706_c0_g1, TRINITY_DN46961_c0_g1	TRINITY_DN19080_c3_g4	TRINITY_DN41409_c2_g1	OG0000900	1	2	1	2	2	1	2	1	1	0	OG0000900	TRINITY_DN3679_c0_g1	TRINITY_DN21914_c5_g1	TRINITY_DN16515_c2_g1	TRINITY_DN28350_c0_g1	TRINITY_DN17584_c11_g2	TRINITY_DN21771_c1_g2	TRINITY_DN46961_c0_g1	TRINITY_DN19080_c3_g4	TRINITY_DN41409_c2_g1	OG0000900	1	1	1	1	1	1	1	1	1	1	OG0000900	TRINITY_DN16515_c2_g1	TRINITY_DN17584_c11_g2	TRINITY_DN41409_c2_g1	TRINITY_DN21771_c1_g2	TRINITY_DN46961_c0_g1	TRINITY_DN28350_c0_g1	TRINITY_DN19080_c3_g4
OG0000901	TRINITY_DN24375_c0_g1, TRINITY_DN893_c12_g1		TRINITY_DN1656_c0_g2	TRINITY_DN20061_c3_g1	TRINITY_DN19295_c1_g4	TRINITY_DN21737_c9_g3, TRINITY_DN22171_c6_g3	TRINITY_DN18199_c9_g2	TRINITY_DN18005_c7_g1, TRINITY_DN19879_c6_g3, TRINITY_DN21339_c1_g1	TRINITY_DN47791_c2_g3, TRINITY_DN48404_c1_g6	OG0000901	2	0	1	1	1	2	1	3	2	0	OG0000901	TRINITY_DN24375_c0_g1		TRINITY_DN1656_c0_g2	TRINITY_DN20061_c3_g1	TRINITY_DN19295_c1_g4	TRINITY_DN21737_c9_g3	TRINITY_DN18199_c9_g2	TRINITY_DN21339_c1_g1	TRINITY_DN47791_c2_g3	OG0000901	1	0	1	1	1	1	1	1	1	0	OG0000901	TRINITY_DN1656_c0_g2	TRINITY_DN19295_c1_g4	TRINITY_DN47791_c2_g3	TRINITY_DN21737_c9_g3	TRINITY_DN18199_c9_g2	TRINITY_DN20061_c3_g1	TRINITY_DN21339_c1_g1
OG0000902	TRINITY_DN10883_c0_g1	TRINITY_DN20197_c8_g2	TRINITY_DN16660_c1_g1, TRINITY_DN4489_c4_g1	TRINITY_DN12864_c3_g5	TRINITY_DN18757_c0_g1, TRINITY_DN18757_c0_g2		TRINITY_DN22245_c3_g1	TRINITY_DN17704_c10_g3, TRINITY_DN18022_c3_g6	TRINITY_DN41929_c4_g6, TRINITY_DN47561_c1_g3, TRINITY_DN47561_c1_g4	OG0000902	1	1	2	1	2	0	1	2	3	0	OG0000902	TRINITY_DN10883_c0_g1	TRINITY_DN20197_c8_g2	TRINITY_DN16660_c1_g1	TRINITY_DN12864_c3_g5	TRINITY_DN18757_c0_g2		TRINITY_DN22245_c3_g1	TRINITY_DN18022_c3_g6	TRINITY_DN47561_c1_g4	OG0000902	1	1	1	1	1	0	1	1	1	0	OG0000902	TRINITY_DN16660_c1_g1	TRINITY_DN18757_c0_g2	TRINITY_DN47561_c1_g4	TRINITY_UK00000_c0_g1	TRINITY_DN22245_c3_g1	TRINITY_DN12864_c3_g5	TRINITY_DN18022_c3_g6
OG0000903	TRINITY_DN236_c2_g2	TRINITY_DN20682_c4_g2	TRINITY_DN1682_c0_g2	TRINITY_DN14036_c2_g1	TRINITY_DN16660_c9_g1	TRINITY_DN23321_c8_g1, TRINITY_DN23321_c8_g2	TRINITY_DN22034_c0_g1	TRINITY_DN17124_c0_g1, TRINITY_DN21173_c6_g1	TRINITY_DN46407_c0_g1, TRINITY_DN46407_c0_g2, TRINITY_DN46407_c0_g3	OG0000903	1	1	1	1	1	2	1	2	3	0	OG0000903	TRINITY_DN236_c2_g2	TRINITY_DN20682_c4_g2	TRINITY_DN1682_c0_g2	TRINITY_DN14036_c2_g1	TRINITY_DN16660_c9_g1	TRINITY_DN23321_c8_g1	TRINITY_DN22034_c0_g1	TRINITY_DN17124_c0_g1	TRINITY_DN46407_c0_g2	OG0000903	1	1	1	1	1	1	1	1	1	1	OG0000903	TRINITY_DN1682_c0_g2	TRINITY_DN16660_c9_g1	TRINITY_DN46407_c0_g2	TRINITY_DN23321_c8_g1	TRINITY_DN22034_c0_g1	TRINITY_DN14036_c2_g1	TRINITY_DN17124_c0_g1
OG0000904	TRINITY_DN1163_c0_g1	TRINITY_DN20441_c4_g1, TRINITY_DN20441_c4_g3	TRINITY_DN1689_c0_g1, TRINITY_DN314_c0_g2	TRINITY_DN19109_c3_g2	TRINITY_DN19158_c6_g1	TRINITY_DN23883_c6_g1	TRINITY_DN23793_c1_g1	TRINITY_DN20298_c11_g1	TRINITY_DN36615_c0_g1, TRINITY_DN38253_c0_g1, TRINITY_DN48985_c1_g1	OG0000904	1	2	2	1	1	1	1	1	3	0	OG0000904	TRINITY_DN1163_c0_g1	TRINITY_DN20441_c4_g1	TRINITY_DN314_c0_g2	TRINITY_DN19109_c3_g2	TRINITY_DN19158_c6_g1	TRINITY_DN23883_c6_g1	TRINITY_DN23793_c1_g1	TRINITY_DN20298_c11_g1	TRINITY_DN36615_c0_g1	OG0000904	1	1	1	1	1	1	1	1	1	1	OG0000904	TRINITY_DN314_c0_g2	TRINITY_DN19158_c6_g1	TRINITY_DN36615_c0_g1	TRINITY_DN23883_c6_g1	TRINITY_DN23793_c1_g1	TRINITY_DN19109_c3_g2	TRINITY_DN20298_c11_g1
OG0000906	TRINITY_DN2270_c0_g1	TRINITY_DN20239_c4_g1, TRINITY_DN20239_c4_g2	TRINITY_DN1743_c0_g1, TRINITY_DN6207_c0_g2	TRINITY_DN15764_c1_g1	TRINITY_DN18465_c0_g1	TRINITY_DN22039_c0_g1	TRINITY_DN21341_c0_g2	TRINITY_DN18526_c0_g1	TRINITY_DN14577_c0_g1, TRINITY_DN44024_c0_g1, TRINITY_DN44024_c7_g1	OG0000906	1	2	2	1	1	1	1	1	3	0	OG0000906	TRINITY_DN2270_c0_g1	TRINITY_DN20239_c4_g1	TRINITY_DN1743_c0_g1	TRINITY_DN15764_c1_g1	TRINITY_DN18465_c0_g1	TRINITY_DN22039_c0_g1	TRINITY_DN21341_c0_g2	TRINITY_DN18526_c0_g1	TRINITY_DN44024_c7_g1	OG0000906	1	1	1	1	1	1	1	1	1	1	OG0000906	TRINITY_DN1743_c0_g1	TRINITY_DN18465_c0_g1	TRINITY_DN44024_c7_g1	TRINITY_DN22039_c0_g1	TRINITY_DN21341_c0_g2	TRINITY_DN15764_c1_g1	TRINITY_DN18526_c0_g1
OG0000907	TRINITY_DN3335_c2_g2	TRINITY_DN19676_c10_g1, TRINITY_DN20929_c9_g1	TRINITY_DN17442_c2_g1	TRINITY_DN18813_c3_g1	TRINITY_DN18434_c1_g1, TRINITY_DN18434_c1_g2	TRINITY_DN23252_c0_g2	TRINITY_DN24325_c8_g1, TRINITY_DN24346_c4_g1	TRINITY_DN18366_c4_g10, TRINITY_DN18366_c4_g13	TRINITY_DN45875_c0_g3	OG0000907	1	2	1	1	2	1	2	2	1	0	OG0000907	TRINITY_DN3335_c2_g2	TRINITY_DN20929_c9_g1	TRINITY_DN17442_c2_g1	TRINITY_DN18813_c3_g1	TRINITY_DN18434_c1_g2	TRINITY_DN23252_c0_g2	TRINITY_DN24346_c4_g1	TRINITY_DN18366_c4_g10	TRINITY_DN45875_c0_g3	OG0000907	1	1	1	1	1	1	1	1	1	1	OG0000907	TRINITY_DN17442_c2_g1	TRINITY_DN18434_c1_g2	TRINITY_DN45875_c0_g3	TRINITY_DN23252_c0_g2	TRINITY_DN24346_c4_g1	TRINITY_DN18813_c3_g1	TRINITY_DN18366_c4_g10
OG0000908	TRINITY_DN2936_c2_g2	TRINITY_DN21461_c7_g2, TRINITY_DN21461_c7_g3	TRINITY_DN1747_c1_g2	TRINITY_DN12806_c4_g2, TRINITY_DN13263_c5_g1	TRINITY_DN19794_c5_g1	TRINITY_DN24727_c10_g2, TRINITY_DN24727_c10_g3	TRINITY_DN24918_c8_g3	TRINITY_DN19792_c6_g1, TRINITY_DN20911_c5_g1	TRINITY_DN47519_c5_g1	OG0000908	1	2	1	2	1	2	1	2	1	0	OG0000908	TRINITY_DN2936_c2_g2	TRINITY_DN21461_c7_g2	TRINITY_DN1747_c1_g2	TRINITY_DN13263_c5_g1	TRINITY_DN19794_c5_g1	TRINITY_DN24727_c10_g2	TRINITY_DN24918_c8_g3	TRINITY_DN20911_c5_g1	TRINITY_DN47519_c5_g1	OG0000908	1	1	1	1	1	1	1	1	1	1	OG0000908	TRINITY_DN1747_c1_g2	TRINITY_DN19794_c5_g1	TRINITY_DN47519_c5_g1	TRINITY_DN24727_c10_g2	TRINITY_DN24918_c8_g3	TRINITY_DN13263_c5_g1	TRINITY_DN20911_c5_g1
OG0000910	TRINITY_DN65203_c0_g1	TRINITY_DN36189_c0_g1	TRINITY_DN17875_c2_g1, TRINITY_DN17875_c4_g1, TRINITY_DN7098_c25_g1	TRINITY_DN21025_c1_g1	TRINITY_DN19146_c1_g3	TRINITY_DN20573_c0_g1, TRINITY_DN20573_c0_g2, TRINITY_DN53373_c0_g1		TRINITY_DN18098_c10_g1, TRINITY_DN40532_c0_g1	TRINITY_DN40346_c0_g1	OG0000910	1	1	3	1	1	3	0	2	1	0	OG0000910	TRINITY_DN65203_c0_g1	TRINITY_DN36189_c0_g1	TRINITY_DN7098_c25_g1	TRINITY_DN21025_c1_g1	TRINITY_DN19146_c1_g3	TRINITY_DN53373_c0_g1		TRINITY_DN18098_c10_g1	TRINITY_DN40346_c0_g1	OG0000910	1	1	1	1	1	1	0	1	1	0	OG0000910	TRINITY_DN7098_c25_g1	TRINITY_DN19146_c1_g3	TRINITY_DN40346_c0_g1	TRINITY_DN53373_c0_g1	TRINITY_UK00000_c0_g1	TRINITY_DN21025_c1_g1	TRINITY_DN18098_c10_g1
OG0000911	TRINITY_DN1759_c2_g1, TRINITY_DN2888_c0_g2	TRINITY_DN18677_c3_g3	TRINITY_DN1804_c1_g1, TRINITY_DN484_c8_g2	TRINITY_DN20714_c8_g1		TRINITY_DN21364_c0_g1, TRINITY_DN24302_c6_g1	TRINITY_DN18710_c11_g2, TRINITY_DN25103_c4_g2	TRINITY_DN21271_c1_g2	TRINITY_DN42489_c5_g1, TRINITY_DN42489_c5_g2	OG0000911	2	1	2	1	0	2	2	1	2	0	OG0000911	TRINITY_DN1759_c2_g1	TRINITY_DN18677_c3_g3	TRINITY_DN484_c8_g2	TRINITY_DN20714_c8_g1		TRINITY_DN21364_c0_g1	TRINITY_DN18710_c11_g2	TRINITY_DN21271_c1_g2	TRINITY_DN42489_c5_g1	OG0000911	1	1	1	1	0	1	1	1	1	0	OG0000911	TRINITY_DN484_c8_g2	TRINITY_UK00000_c0_g1	TRINITY_DN42489_c5_g1	TRINITY_DN21364_c0_g1	TRINITY_DN18710_c11_g2	TRINITY_DN20714_c8_g1	TRINITY_DN21271_c1_g2
OG0000913	TRINITY_DN3018_c0_g2	TRINITY_DN22130_c1_g2	TRINITY_DN1867_c1_g1	TRINITY_DN16339_c2_g1	TRINITY_DN19628_c3_g1	TRINITY_DN22046_c8_g2, TRINITY_DN22046_c8_g4	TRINITY_DN24384_c11_g1, TRINITY_DN24384_c11_g2	TRINITY_DN20915_c8_g1, TRINITY_DN20915_c8_g6	TRINITY_DN43188_c1_g2, TRINITY_DN48257_c3_g1	OG0000913	1	1	1	1	1	2	2	2	2	0	OG0000913	TRINITY_DN3018_c0_g2	TRINITY_DN22130_c1_g2	TRINITY_DN1867_c1_g1	TRINITY_DN16339_c2_g1	TRINITY_DN19628_c3_g1	TRINITY_DN22046_c8_g4	TRINITY_DN24384_c11_g1	TRINITY_DN20915_c8_g1	TRINITY_DN48257_c3_g1	OG0000913	1	1	1	1	1	1	1	1	1	1	OG0000913	TRINITY_DN1867_c1_g1	TRINITY_DN19628_c3_g1	TRINITY_DN48257_c3_g1	TRINITY_DN22046_c8_g4	TRINITY_DN24384_c11_g1	TRINITY_DN16339_c2_g1	TRINITY_DN20915_c8_g1
OG0000914	TRINITY_DN57811_c5_g1, TRINITY_DN58245_c1_g1, TRINITY_DN64254_c4_g1	TRINITY_DN19415_c7_g1, TRINITY_DN19415_c7_g2, TRINITY_DN40176_c0_g1	TRINITY_DN18894_c2_g1, TRINITY_DN5120_c1_g1	TRINITY_DN19703_c6_g1	TRINITY_DN16457_c7_g4	TRINITY_DN21004_c0_g1	TRINITY_DN23619_c0_g2		TRINITY_DN48201_c0_g1	OG0000914	3	3	2	1	1	1	1	0	1	0	OG0000914	TRINITY_DN57811_c5_g1	TRINITY_DN19415_c7_g2	TRINITY_DN18894_c2_g1	TRINITY_DN19703_c6_g1	TRINITY_DN16457_c7_g4	TRINITY_DN21004_c0_g1	TRINITY_DN23619_c0_g2		TRINITY_DN48201_c0_g1	OG0000914	1	1	1	1	1	1	1	0	1	0	OG0000914	TRINITY_DN18894_c2_g1	TRINITY_DN16457_c7_g4	TRINITY_DN48201_c0_g1	TRINITY_DN21004_c0_g1	TRINITY_DN23619_c0_g2	TRINITY_DN19703_c6_g1	TRINITY_UK00000_c0_g1
OG0000916	TRINITY_DN461_c0_g3	TRINITY_DN23924_c3_g2	TRINITY_DN189_c0_g2	TRINITY_DN18948_c1_g3	TRINITY_DN16712_c3_g2, TRINITY_DN17604_c2_g1	TRINITY_DN21317_c0_g1, TRINITY_DN23325_c6_g6	TRINITY_DN19026_c6_g1, TRINITY_DN23239_c6_g1	TRINITY_DN18375_c4_g4	TRINITY_DN45163_c2_g2, TRINITY_DN46313_c7_g1	OG0000916	1	1	1	1	2	2	2	1	2	0	OG0000916	TRINITY_DN461_c0_g3	TRINITY_DN23924_c3_g2	TRINITY_DN189_c0_g2	TRINITY_DN18948_c1_g3	TRINITY_DN17604_c2_g1	TRINITY_DN23325_c6_g6	TRINITY_DN19026_c6_g1	TRINITY_DN18375_c4_g4	TRINITY_DN45163_c2_g2	OG0000916	1	1	1	1	1	1	1	1	1	1	OG0000916	TRINITY_DN189_c0_g2	TRINITY_DN17604_c2_g1	TRINITY_DN45163_c2_g2	TRINITY_DN23325_c6_g6	TRINITY_DN19026_c6_g1	TRINITY_DN18948_c1_g3	TRINITY_DN18375_c4_g4
OG0000917	TRINITY_DN3479_c0_g2	TRINITY_DN23081_c7_g1	TRINITY_DN190_c6_g2	TRINITY_DN17698_c2_g1, TRINITY_DN19734_c7_g1	TRINITY_DN17483_c7_g5	TRINITY_DN23327_c6_g10	TRINITY_DN21945_c2_g2, TRINITY_DN23302_c5_g1	TRINITY_DN19355_c5_g1, TRINITY_DN20658_c4_g9	TRINITY_DN46154_c4_g1, TRINITY_DN48223_c0_g1	OG0000917	1	1	1	2	1	1	2	2	2	0	OG0000917	TRINITY_DN3479_c0_g2	TRINITY_DN23081_c7_g1	TRINITY_DN190_c6_g2	TRINITY_DN17698_c2_g1	TRINITY_DN17483_c7_g5	TRINITY_DN23327_c6_g10	TRINITY_DN23302_c5_g1	TRINITY_DN19355_c5_g1	TRINITY_DN46154_c4_g1	OG0000917	1	1	1	1	1	1	1	1	1	1	OG0000917	TRINITY_DN190_c6_g2	TRINITY_DN17483_c7_g5	TRINITY_DN46154_c4_g1	TRINITY_DN23327_c6_g10	TRINITY_DN23302_c5_g1	TRINITY_DN17698_c2_g1	TRINITY_DN19355_c5_g1
OG0000919	TRINITY_DN120_c0_g1	TRINITY_DN18534_c7_g2, TRINITY_DN54908_c0_g1	TRINITY_DN1918_c2_g1	TRINITY_DN18605_c7_g1	TRINITY_DN18263_c4_g3, TRINITY_DN9904_c0_g1	TRINITY_DN24683_c8_g1, TRINITY_DN24683_c8_g4, TRINITY_DN33948_c0_g1		TRINITY_DN19296_c9_g1	TRINITY_DN16959_c0_g2, TRINITY_DN49911_c0_g1	OG0000919	1	2	1	1	2	3	0	1	2	0	OG0000919	TRINITY_DN120_c0_g1	TRINITY_DN18534_c7_g2	TRINITY_DN1918_c2_g1	TRINITY_DN18605_c7_g1	TRINITY_DN18263_c4_g3	TRINITY_DN24683_c8_g1		TRINITY_DN19296_c9_g1	TRINITY_DN49911_c0_g1	OG0000919	1	1	1	1	1	1	0	1	1	0	OG0000919	TRINITY_DN1918_c2_g1	TRINITY_DN18263_c4_g3	TRINITY_DN49911_c0_g1	TRINITY_DN24683_c8_g1	TRINITY_UK00000_c0_g1	TRINITY_DN18605_c7_g1	TRINITY_DN19296_c9_g1
OG0000920	TRINITY_DN527_c3_g7, TRINITY_DN59020_c0_g1	TRINITY_DN17563_c0_g1, TRINITY_DN20082_c8_g1, TRINITY_DN59103_c0_g1	TRINITY_DN19466_c1_g1	TRINITY_DN12154_c0_g1	TRINITY_DN15199_c0_g1, TRINITY_DN38092_c0_g1	TRINITY_DN17231_c0_g1	TRINITY_DN20654_c3_g2	TRINITY_DN14562_c0_g1	TRINITY_DN40406_c0_g1	OG0000920	2	3	1	1	2	1	1	1	1	0	OG0000920	TRINITY_DN527_c3_g7	TRINITY_DN20082_c8_g1	TRINITY_DN19466_c1_g1	TRINITY_DN12154_c0_g1	TRINITY_DN15199_c0_g1	TRINITY_DN17231_c0_g1	TRINITY_DN20654_c3_g2	TRINITY_DN14562_c0_g1	TRINITY_DN40406_c0_g1	OG0000920	1	1	1	1	1	1	1	1	1	1	OG0000920	TRINITY_DN19466_c1_g1	TRINITY_DN15199_c0_g1	TRINITY_DN40406_c0_g1	TRINITY_DN17231_c0_g1	TRINITY_DN20654_c3_g2	TRINITY_DN12154_c0_g1	TRINITY_DN14562_c0_g1
OG0000921		TRINITY_DN21852_c8_g1, TRINITY_DN22604_c1_g1	TRINITY_DN19647_c0_g2	TRINITY_DN17352_c4_g2	TRINITY_DN17926_c2_g1	TRINITY_DN20201_c0_g1, TRINITY_DN20201_c0_g4, TRINITY_DN43985_c0_g1	TRINITY_DN18247_c7_g9, TRINITY_DN21858_c5_g1	TRINITY_DN16592_c0_g1	TRINITY_DN40004_c0_g1, TRINITY_DN42127_c0_g1	OG0000921	0	2	1	1	1	3	2	1	2	0	OG0000921		TRINITY_DN21852_c8_g1	TRINITY_DN19647_c0_g2	TRINITY_DN17352_c4_g2	TRINITY_DN17926_c2_g1	TRINITY_DN20201_c0_g4	TRINITY_DN18247_c7_g9	TRINITY_DN16592_c0_g1	TRINITY_DN42127_c0_g1	OG0000921	0	1	1	1	1	1	1	1	1	0	OG0000921	TRINITY_DN19647_c0_g2	TRINITY_DN17926_c2_g1	TRINITY_DN42127_c0_g1	TRINITY_DN20201_c0_g4	TRINITY_DN18247_c7_g9	TRINITY_DN17352_c4_g2	TRINITY_DN16592_c0_g1
OG0000922	TRINITY_DN1974_c2_g1	TRINITY_DN23720_c2_g1	TRINITY_DN20377_c3_g1, TRINITY_DN38550_c1_g1	TRINITY_DN22345_c0_g1, TRINITY_DN2451_c0_g1	TRINITY_DN20125_c0_g1, TRINITY_DN24863_c0_g1, TRINITY_DN37123_c0_g1	TRINITY_DN31116_c0_g1, TRINITY_DN33805_c0_g1	TRINITY_DN19011_c4_g2, TRINITY_DN23008_c8_g2			OG0000922	1	1	2	2	3	2	2	0	0	0	OG0000922	TRINITY_DN1974_c2_g1	TRINITY_DN23720_c2_g1	TRINITY_DN38550_c1_g1	TRINITY_DN2451_c0_g1	TRINITY_DN37123_c0_g1	TRINITY_DN31116_c0_g1	TRINITY_DN23008_c8_g2			OG0000922	1	1	1	1	1	1	1	0	0	0	OG0000922	TRINITY_DN38550_c1_g1	TRINITY_DN37123_c0_g1	TRINITY_UK00000_c0_g1	TRINITY_DN31116_c0_g1	TRINITY_DN23008_c8_g2	TRINITY_DN2451_c0_g1	TRINITY_UK00000_c0_g1
OG0000923	TRINITY_DN2544_c0_g2, TRINITY_DN2676_c1_g1	TRINITY_DN21892_c4_g1, TRINITY_DN2485_c0_g2	TRINITY_DN2055_c0_g2	TRINITY_DN12767_c10_g2, TRINITY_DN13851_c4_g2, TRINITY_DN17149_c2_g1	TRINITY_DN17626_c6_g2	TRINITY_DN21541_c0_g1	TRINITY_DN18346_c0_g1	TRINITY_DN17355_c0_g1	TRINITY_DN41850_c0_g1	OG0000923	2	2	1	3	1	1	1	1	1	0	OG0000923	TRINITY_DN2544_c0_g2	TRINITY_DN21892_c4_g1	TRINITY_DN2055_c0_g2	TRINITY_DN12767_c10_g2	TRINITY_DN17626_c6_g2	TRINITY_DN21541_c0_g1	TRINITY_DN18346_c0_g1	TRINITY_DN17355_c0_g1	TRINITY_DN41850_c0_g1	OG0000923	1	1	1	1	1	1	1	1	1	1	OG0000923	TRINITY_DN2055_c0_g2	TRINITY_DN17626_c6_g2	TRINITY_DN41850_c0_g1	TRINITY_DN21541_c0_g1	TRINITY_DN18346_c0_g1	TRINITY_DN12767_c10_g2	TRINITY_DN17355_c0_g1
OG0000924	TRINITY_DN41412_c0_g2	TRINITY_DN23725_c4_g1, TRINITY_DN23725_c4_g2	TRINITY_DN2091_c1_g1	TRINITY_DN19112_c1_g1	TRINITY_DN16046_c0_g1, TRINITY_DN16046_c0_g2	TRINITY_DN22919_c5_g1	TRINITY_DN20253_c4_g1	TRINITY_DN20021_c2_g1	TRINITY_DN43994_c0_g1, TRINITY_DN43994_c0_g2, TRINITY_DN43994_c0_g3	OG0000924	1	2	1	1	2	1	1	1	3	0	OG0000924	TRINITY_DN41412_c0_g2	TRINITY_DN23725_c4_g2	TRINITY_DN2091_c1_g1	TRINITY_DN19112_c1_g1	TRINITY_DN16046_c0_g2	TRINITY_DN22919_c5_g1	TRINITY_DN20253_c4_g1	TRINITY_DN20021_c2_g1	TRINITY_DN43994_c0_g2	OG0000924	1	1	1	1	1	1	1	1	1	1	OG0000924	TRINITY_DN2091_c1_g1	TRINITY_DN16046_c0_g2	TRINITY_DN43994_c0_g2	TRINITY_DN22919_c5_g1	TRINITY_DN20253_c4_g1	TRINITY_DN19112_c1_g1	TRINITY_DN20021_c2_g1
OG0000925	TRINITY_DN2317_c3_g4, TRINITY_DN8101_c0_g1	TRINITY_DN11632_c0_g2, TRINITY_DN20713_c2_g2	TRINITY_DN2124_c0_g1	TRINITY_DN15751_c1_g1, TRINITY_DN18625_c10_g3	TRINITY_DN17514_c4_g3	TRINITY_DN23445_c9_g1	TRINITY_DN18926_c6_g2, TRINITY_DN21077_c7_g6	TRINITY_DN17794_c6_g1	TRINITY_DN43451_c3_g1	OG0000925	2	2	1	2	1	1	2	1	1	0	OG0000925	TRINITY_DN8101_c0_g1	TRINITY_DN20713_c2_g2	TRINITY_DN2124_c0_g1	TRINITY_DN18625_c10_g3	TRINITY_DN17514_c4_g3	TRINITY_DN23445_c9_g1	TRINITY_DN21077_c7_g6	TRINITY_DN17794_c6_g1	TRINITY_DN43451_c3_g1	OG0000925	1	1	1	1	1	1	1	1	1	1	OG0000925	TRINITY_DN2124_c0_g1	TRINITY_DN17514_c4_g3	TRINITY_DN43451_c3_g1	TRINITY_DN23445_c9_g1	TRINITY_DN21077_c7_g6	TRINITY_DN18625_c10_g3	TRINITY_DN17794_c6_g1
OG0000926	TRINITY_DN14558_c0_g1, TRINITY_DN4201_c0_g3	TRINITY_DN21685_c4_g1, TRINITY_DN21685_c4_g3	TRINITY_DN21527_c0_g2	TRINITY_DN12084_c0_g2, TRINITY_DN12084_c1_g1	TRINITY_DN19485_c5_g2	TRINITY_DN24944_c1_g3	TRINITY_DN19427_c8_g1, TRINITY_DN43119_c0_g1	TRINITY_DN17899_c0_g6	TRINITY_DN44511_c0_g1	OG0000926	2	2	1	2	1	1	2	1	1	0	OG0000926	TRINITY_DN4201_c0_g3	TRINITY_DN21685_c4_g1	TRINITY_DN21527_c0_g2	TRINITY_DN12084_c1_g1	TRINITY_DN19485_c5_g2	TRINITY_DN24944_c1_g3	TRINITY_DN19427_c8_g1	TRINITY_DN17899_c0_g6	TRINITY_DN44511_c0_g1	OG0000926	1	1	1	1	1	1	1	1	1	1	OG0000926	TRINITY_DN21527_c0_g2	TRINITY_DN19485_c5_g2	TRINITY_DN44511_c0_g1	TRINITY_DN24944_c1_g3	TRINITY_DN19427_c8_g1	TRINITY_DN12084_c1_g1	TRINITY_DN17899_c0_g6
OG0000928		TRINITY_DN43338_c0_g1	TRINITY_DN2221_c6_g1	TRINITY_DN19545_c3_g3, TRINITY_DN19545_c3_g4	TRINITY_DN31348_c0_g1, TRINITY_DN46373_c0_g1	TRINITY_DN33340_c0_g1, TRINITY_DN44500_c0_g1, TRINITY_DN48176_c0_g1	TRINITY_DN39333_c0_g1	TRINITY_DN47099_c0_g1	TRINITY_DN82013_c0_g1, TRINITY_DN89607_c0_g1	OG0000928	0	1	1	2	2	3	1	1	2	0	OG0000928		TRINITY_DN43338_c0_g1	TRINITY_DN2221_c6_g1	TRINITY_DN19545_c3_g3	TRINITY_DN46373_c0_g1	TRINITY_DN48176_c0_g1	TRINITY_DN39333_c0_g1	TRINITY_DN47099_c0_g1	TRINITY_DN82013_c0_g1	OG0000928	0	1	1	1	1	1	1	1	1	0	OG0000928	TRINITY_DN2221_c6_g1	TRINITY_DN46373_c0_g1	TRINITY_DN82013_c0_g1	TRINITY_DN48176_c0_g1	TRINITY_DN39333_c0_g1	TRINITY_DN19545_c3_g3	TRINITY_DN47099_c0_g1
OG0000929	TRINITY_DN483_c0_g1	TRINITY_DN19503_c3_g1	TRINITY_DN2225_c0_g1	TRINITY_DN20946_c4_g1	TRINITY_DN16634_c8_g2, TRINITY_DN19615_c6_g1	TRINITY_DN23871_c2_g1	TRINITY_DN19830_c0_g1, TRINITY_DN25059_c3_g1	TRINITY_DN21046_c5_g4, TRINITY_DN21054_c3_g3	TRINITY_DN48284_c3_g1, TRINITY_DN48284_c3_g3	OG0000929	1	1	1	1	2	1	2	2	2	0	OG0000929	TRINITY_DN483_c0_g1	TRINITY_DN19503_c3_g1	TRINITY_DN2225_c0_g1	TRINITY_DN20946_c4_g1	TRINITY_DN16634_c8_g2	TRINITY_DN23871_c2_g1	TRINITY_DN25059_c3_g1	TRINITY_DN21054_c3_g3	TRINITY_DN48284_c3_g1	OG0000929	1	1	1	1	1	1	1	1	1	1	OG0000929	TRINITY_DN2225_c0_g1	TRINITY_DN16634_c8_g2	TRINITY_DN48284_c3_g1	TRINITY_DN23871_c2_g1	TRINITY_DN25059_c3_g1	TRINITY_DN20946_c4_g1	TRINITY_DN21054_c3_g3
OG0000930	TRINITY_DN6988_c0_g1	TRINITY_DN21047_c1_g3	TRINITY_DN2226_c1_g2, TRINITY_DN2226_c1_g3, TRINITY_DN7223_c0_g1	TRINITY_DN17470_c5_g1, TRINITY_DN17470_c5_g2	TRINITY_DN16949_c3_g1	TRINITY_DN21751_c0_g2	TRINITY_DN19893_c7_g2	TRINITY_DN17042_c0_g1	TRINITY_DN36332_c0_g1, TRINITY_DN46263_c0_g1	OG0000930	1	1	3	2	1	1	1	1	2	0	OG0000930	TRINITY_DN6988_c0_g1	TRINITY_DN21047_c1_g3	TRINITY_DN7223_c0_g1	TRINITY_DN17470_c5_g2	TRINITY_DN16949_c3_g1	TRINITY_DN21751_c0_g2	TRINITY_DN19893_c7_g2	TRINITY_DN17042_c0_g1	TRINITY_DN46263_c0_g1	OG0000930	1	1	1	1	1	1	1	1	1	1	OG0000930	TRINITY_DN7223_c0_g1	TRINITY_DN16949_c3_g1	TRINITY_DN46263_c0_g1	TRINITY_DN21751_c0_g2	TRINITY_DN19893_c7_g2	TRINITY_DN17470_c5_g2	TRINITY_DN17042_c0_g1
OG0000931	TRINITY_DN659_c1_g2	TRINITY_DN19039_c3_g3, TRINITY_DN22346_c6_g4, TRINITY_DN65794_c0_g1	TRINITY_DN223_c2_g1	TRINITY_DN19893_c3_g2	TRINITY_DN17058_c6_g1	TRINITY_DN21749_c12_g1	TRINITY_DN23694_c3_g2	TRINITY_DN18403_c12_g2, TRINITY_DN19736_c6_g1	TRINITY_DN44062_c9_g3, TRINITY_DN47206_c6_g1	OG0000931	1	3	1	1	1	1	1	2	2	0	OG0000931	TRINITY_DN659_c1_g2	TRINITY_DN22346_c6_g4	TRINITY_DN223_c2_g1	TRINITY_DN19893_c3_g2	TRINITY_DN17058_c6_g1	TRINITY_DN21749_c12_g1	TRINITY_DN23694_c3_g2	TRINITY_DN18403_c12_g2	TRINITY_DN47206_c6_g1	OG0000931	1	1	1	1	1	1	1	1	1	1	OG0000931	TRINITY_DN223_c2_g1	TRINITY_DN17058_c6_g1	TRINITY_DN47206_c6_g1	TRINITY_DN21749_c12_g1	TRINITY_DN23694_c3_g2	TRINITY_DN19893_c3_g2	TRINITY_DN18403_c12_g2
OG0000932	TRINITY_DN976_c3_g2	TRINITY_DN19696_c6_g1, TRINITY_DN19894_c7_g1	TRINITY_DN225_c2_g4	TRINITY_DN15206_c6_g1	TRINITY_DN18219_c6_g1, TRINITY_DN18219_c6_g6	TRINITY_DN23872_c5_g5, TRINITY_DN24179_c5_g1	TRINITY_DN19104_c6_g1, TRINITY_DN22158_c1_g2	TRINITY_DN20889_c0_g2	TRINITY_DN46608_c6_g1	OG0000932	1	2	1	1	2	2	2	1	1	0	OG0000932	TRINITY_DN976_c3_g2	TRINITY_DN19894_c7_g1	TRINITY_DN225_c2_g4	TRINITY_DN15206_c6_g1	TRINITY_DN18219_c6_g1	TRINITY_DN24179_c5_g1	TRINITY_DN19104_c6_g1	TRINITY_DN20889_c0_g2	TRINITY_DN46608_c6_g1	OG0000932	1	1	1	1	1	1	1	1	1	1	OG0000932	TRINITY_DN225_c2_g4	TRINITY_DN18219_c6_g1	TRINITY_DN46608_c6_g1	TRINITY_DN24179_c5_g1	TRINITY_DN19104_c6_g1	TRINITY_DN15206_c6_g1	TRINITY_DN20889_c0_g2
OG0000933	TRINITY_DN2873_c0_g1	TRINITY_DN23757_c7_g1, TRINITY_DN43339_c0_g1	TRINITY_DN231_c0_g2	TRINITY_DN20141_c4_g1	TRINITY_DN19340_c2_g1, TRINITY_DN19367_c9_g3	TRINITY_DN24804_c1_g3	TRINITY_DN23867_c5_g1	TRINITY_DN20870_c0_g1, TRINITY_DN20870_c0_g2	TRINITY_DN36073_c0_g1, TRINITY_DN49021_c7_g1	OG0000933	1	2	1	1	2	1	1	2	2	0	OG0000933	TRINITY_DN2873_c0_g1	TRINITY_DN23757_c7_g1	TRINITY_DN231_c0_g2	TRINITY_DN20141_c4_g1	TRINITY_DN19340_c2_g1	TRINITY_DN24804_c1_g3	TRINITY_DN23867_c5_g1	TRINITY_DN20870_c0_g2	TRINITY_DN36073_c0_g1	OG0000933	1	1	1	1	1	1	1	1	1	1	OG0000933	TRINITY_DN231_c0_g2	TRINITY_DN19340_c2_g1	TRINITY_DN36073_c0_g1	TRINITY_DN24804_c1_g3	TRINITY_DN23867_c5_g1	TRINITY_DN20141_c4_g1	TRINITY_DN20870_c0_g2
OG0000935	TRINITY_DN13_c1_g1	TRINITY_DN21058_c2_g1	TRINITY_DN23344_c0_g2	TRINITY_DN14349_c5_g1, TRINITY_DN14349_c5_g2, TRINITY_DN20915_c4_g1	TRINITY_DN11509_c0_g1, TRINITY_DN11509_c0_g2, TRINITY_DN15245_c0_g1	TRINITY_DN20264_c0_g1, TRINITY_DN20264_c0_g2	TRINITY_DN23510_c3_g1		TRINITY_DN57697_c0_g1	OG0000935	1	1	1	3	3	2	1	0	1	0	OG0000935	TRINITY_DN13_c1_g1	TRINITY_DN21058_c2_g1	TRINITY_DN23344_c0_g2	TRINITY_DN20915_c4_g1	TRINITY_DN11509_c0_g2	TRINITY_DN20264_c0_g1	TRINITY_DN23510_c3_g1		TRINITY_DN57697_c0_g1	OG0000935	1	1	1	1	1	1	1	0	1	0	OG0000935	TRINITY_DN23344_c0_g2	TRINITY_DN11509_c0_g2	TRINITY_DN57697_c0_g1	TRINITY_DN20264_c0_g1	TRINITY_DN23510_c3_g1	TRINITY_DN20915_c4_g1	TRINITY_UK00000_c0_g1
OG0000936	TRINITY_DN1801_c0_g1	TRINITY_DN21820_c6_g1, TRINITY_DN21820_c6_g2, TRINITY_DN22652_c3_g5	TRINITY_DN2351_c0_g2	TRINITY_DN18890_c2_g2		TRINITY_DN22387_c6_g1	TRINITY_DN22124_c6_g1, TRINITY_DN24511_c9_g1	TRINITY_DN19889_c7_g2	TRINITY_DN44702_c4_g1, TRINITY_DN44702_c4_g2, TRINITY_DN47095_c8_g1	OG0000936	1	3	1	1	0	1	2	1	3	0	OG0000936	TRINITY_DN1801_c0_g1	TRINITY_DN21820_c6_g1	TRINITY_DN2351_c0_g2	TRINITY_DN18890_c2_g2		TRINITY_DN22387_c6_g1	TRINITY_DN22124_c6_g1	TRINITY_DN19889_c7_g2	TRINITY_DN47095_c8_g1	OG0000936	1	1	1	1	0	1	1	1	1	0	OG0000936	TRINITY_DN2351_c0_g2	TRINITY_UK00000_c0_g1	TRINITY_DN47095_c8_g1	TRINITY_DN22387_c6_g1	TRINITY_DN22124_c6_g1	TRINITY_DN18890_c2_g2	TRINITY_DN19889_c7_g2
OG0000937	TRINITY_DN543_c3_g1	TRINITY_DN20104_c6_g1, TRINITY_DN51979_c0_g1	TRINITY_DN237_c0_g2	TRINITY_DN16711_c9_g1, TRINITY_DN16768_c5_g2	TRINITY_DN18039_c5_g1	TRINITY_DN23976_c4_g1	TRINITY_DN21033_c7_g3	TRINITY_DN18106_c8_g1	TRINITY_DN44612_c7_g1, TRINITY_DN44612_c7_g2, TRINITY_DN47089_c0_g1	OG0000937	1	2	1	2	1	1	1	1	3	0	OG0000937	TRINITY_DN543_c3_g1	TRINITY_DN20104_c6_g1	TRINITY_DN237_c0_g2	TRINITY_DN16768_c5_g2	TRINITY_DN18039_c5_g1	TRINITY_DN23976_c4_g1	TRINITY_DN21033_c7_g3	TRINITY_DN18106_c8_g1	TRINITY_DN44612_c7_g1	OG0000937	1	1	1	1	1	1	1	1	1	1	OG0000937	TRINITY_DN237_c0_g2	TRINITY_DN18039_c5_g1	TRINITY_DN44612_c7_g1	TRINITY_DN23976_c4_g1	TRINITY_DN21033_c7_g3	TRINITY_DN16768_c5_g2	TRINITY_DN18106_c8_g1
OG0000938		TRINITY_DN20424_c3_g1, TRINITY_DN21574_c9_g1	TRINITY_DN238_c6_g1	TRINITY_DN20117_c3_g5	TRINITY_DN17956_c1_g1, TRINITY_DN18327_c12_g2	TRINITY_DN21642_c6_g2	TRINITY_DN23837_c2_g6, TRINITY_DN25071_c3_g1	TRINITY_DN17879_c1_g1, TRINITY_DN18231_c3_g2	TRINITY_DN41984_c1_g1, TRINITY_DN45718_c8_g1	OG0000938	0	2	1	1	2	1	2	2	2	0	OG0000938		TRINITY_DN21574_c9_g1	TRINITY_DN238_c6_g1	TRINITY_DN20117_c3_g5	TRINITY_DN18327_c12_g2	TRINITY_DN21642_c6_g2	TRINITY_DN23837_c2_g6	TRINITY_DN17879_c1_g1	TRINITY_DN45718_c8_g1	OG0000938	0	1	1	1	1	1	1	1	1	0	OG0000938	TRINITY_DN238_c6_g1	TRINITY_DN18327_c12_g2	TRINITY_DN45718_c8_g1	TRINITY_DN21642_c6_g2	TRINITY_DN23837_c2_g6	TRINITY_DN20117_c3_g5	TRINITY_DN17879_c1_g1
OG0000939	TRINITY_DN3254_c0_g1	TRINITY_DN23282_c1_g1, TRINITY_DN23282_c1_g2	TRINITY_DN2414_c0_g2	TRINITY_DN13459_c6_g2, TRINITY_DN16715_c0_g2	TRINITY_DN19462_c2_g2	TRINITY_DN23545_c1_g1	TRINITY_DN23136_c0_g1, TRINITY_DN24394_c2_g2	TRINITY_DN18002_c7_g1	TRINITY_DN48382_c3_g1, TRINITY_DN48898_c2_g1	OG0000939	1	2	1	2	1	1	2	1	2	0	OG0000939	TRINITY_DN3254_c0_g1	TRINITY_DN23282_c1_g1	TRINITY_DN2414_c0_g2	TRINITY_DN16715_c0_g2	TRINITY_DN19462_c2_g2	TRINITY_DN23545_c1_g1	TRINITY_DN23136_c0_g1	TRINITY_DN18002_c7_g1	TRINITY_DN48382_c3_g1	OG0000939	1	1	1	1	1	1	1	1	1	1	OG0000939	TRINITY_DN2414_c0_g2	TRINITY_DN19462_c2_g2	TRINITY_DN48382_c3_g1	TRINITY_DN23545_c1_g1	TRINITY_DN23136_c0_g1	TRINITY_DN16715_c0_g2	TRINITY_DN18002_c7_g1
OG0000941	TRINITY_DN8042_c0_g1	TRINITY_DN21031_c4_g1, TRINITY_DN36172_c0_g1, TRINITY_DN51194_c0_g1	TRINITY_DN2470_c0_g2	TRINITY_DN19392_c3_g1, TRINITY_DN20016_c7_g1	TRINITY_DN17951_c4_g2	TRINITY_DN22338_c5_g1, TRINITY_DN22913_c7_g2	TRINITY_DN22282_c2_g1	TRINITY_DN19378_c0_g1	TRINITY_DN47624_c2_g2	OG0000941	1	3	1	2	1	2	1	1	1	0	OG0000941	TRINITY_DN8042_c0_g1	TRINITY_DN21031_c4_g1	TRINITY_DN2470_c0_g2	TRINITY_DN20016_c7_g1	TRINITY_DN17951_c4_g2	TRINITY_DN22913_c7_g2	TRINITY_DN22282_c2_g1	TRINITY_DN19378_c0_g1	TRINITY_DN47624_c2_g2	OG0000941	1	1	1	1	1	1	1	1	1	1	OG0000941	TRINITY_DN2470_c0_g2	TRINITY_DN17951_c4_g2	TRINITY_DN47624_c2_g2	TRINITY_DN22913_c7_g2	TRINITY_DN22282_c2_g1	TRINITY_DN20016_c7_g1	TRINITY_DN19378_c0_g1
OG0000942	TRINITY_DN14228_c3_g1, TRINITY_DN5176_c0_g1, TRINITY_DN62452_c1_g1	TRINITY_DN20039_c0_g1, TRINITY_DN20039_c0_g2, TRINITY_DN20039_c0_g3	TRINITY_DN2488_c0_g2	TRINITY_DN20588_c6_g1	TRINITY_DN17167_c4_g2	TRINITY_DN24472_c5_g1	TRINITY_DN21683_c4_g1	TRINITY_DN16764_c0_g1	TRINITY_DN44933_c0_g1	OG0000942	3	3	1	1	1	1	1	1	1	0	OG0000942	TRINITY_DN5176_c0_g1	TRINITY_DN20039_c0_g1	TRINITY_DN2488_c0_g2	TRINITY_DN20588_c6_g1	TRINITY_DN17167_c4_g2	TRINITY_DN24472_c5_g1	TRINITY_DN21683_c4_g1	TRINITY_DN16764_c0_g1	TRINITY_DN44933_c0_g1	OG0000942	1	1	1	1	1	1	1	1	1	1	OG0000942	TRINITY_DN2488_c0_g2	TRINITY_DN17167_c4_g2	TRINITY_DN44933_c0_g1	TRINITY_DN24472_c5_g1	TRINITY_DN21683_c4_g1	TRINITY_DN20588_c6_g1	TRINITY_DN16764_c0_g1
OG0000943	TRINITY_DN5311_c0_g1, TRINITY_DN5311_c0_g2	TRINITY_DN22184_c5_g1	TRINITY_DN25094_c1_g1	TRINITY_DN16462_c6_g1	TRINITY_DN13560_c0_g1, TRINITY_DN17491_c3_g4	TRINITY_DN22821_c3_g1	TRINITY_DN19450_c0_g1	TRINITY_DN18502_c2_g1, TRINITY_DN18502_c2_g2	TRINITY_DN46996_c11_g1, TRINITY_DN46996_c8_g1	OG0000943	2	1	1	1	2	1	1	2	2	0	OG0000943	TRINITY_DN5311_c0_g2	TRINITY_DN22184_c5_g1	TRINITY_DN25094_c1_g1	TRINITY_DN16462_c6_g1	TRINITY_DN13560_c0_g1	TRINITY_DN22821_c3_g1	TRINITY_DN19450_c0_g1	TRINITY_DN18502_c2_g1	TRINITY_DN46996_c8_g1	OG0000943	1	1	1	1	1	1	1	1	1	1	OG0000943	TRINITY_DN25094_c1_g1	TRINITY_DN13560_c0_g1	TRINITY_DN46996_c8_g1	TRINITY_DN22821_c3_g1	TRINITY_DN19450_c0_g1	TRINITY_DN16462_c6_g1	TRINITY_DN18502_c2_g1
OG0000944	TRINITY_DN10368_c0_g1	TRINITY_DN17955_c0_g1	TRINITY_DN25133_c2_g3	TRINITY_DN15880_c2_g1, TRINITY_DN9459_c0_g2	TRINITY_DN16589_c8_g2	TRINITY_DN18752_c0_g1, TRINITY_DN22127_c6_g1	TRINITY_DN23203_c5_g2	TRINITY_DN8485_c0_g1	TRINITY_DN35526_c0_g1, TRINITY_DN37092_c0_g1, TRINITY_DN85325_c0_g1	OG0000944	1	1	1	2	1	2	1	1	3	0	OG0000944	TRINITY_DN10368_c0_g1	TRINITY_DN17955_c0_g1	TRINITY_DN25133_c2_g3	TRINITY_DN15880_c2_g1	TRINITY_DN16589_c8_g2	TRINITY_DN18752_c0_g1	TRINITY_DN23203_c5_g2	TRINITY_DN8485_c0_g1	TRINITY_DN35526_c0_g1	OG0000944	1	1	1	1	1	1	1	1	1	1	OG0000944	TRINITY_DN25133_c2_g3	TRINITY_DN16589_c8_g2	TRINITY_DN35526_c0_g1	TRINITY_DN18752_c0_g1	TRINITY_DN23203_c5_g2	TRINITY_DN15880_c2_g1	TRINITY_DN8485_c0_g1
OG0000945		TRINITY_DN21284_c4_g1	TRINITY_DN25234_c1_g2	TRINITY_DN14218_c1_g2	TRINITY_DN17519_c2_g1, TRINITY_DN17519_c2_g2	TRINITY_DN24097_c1_g1	TRINITY_DN18892_c0_g1, TRINITY_DN24325_c6_g1	TRINITY_DN19409_c0_g2, TRINITY_DN19409_c0_g3	TRINITY_DN42943_c1_g1, TRINITY_DN42943_c4_g1, TRINITY_DN42943_c5_g1	OG0000945	0	1	1	1	2	1	2	2	3	0	OG0000945		TRINITY_DN21284_c4_g1	TRINITY_DN25234_c1_g2	TRINITY_DN14218_c1_g2	TRINITY_DN17519_c2_g1	TRINITY_DN24097_c1_g1	TRINITY_DN24325_c6_g1	TRINITY_DN19409_c0_g2	TRINITY_DN42943_c4_g1	OG0000945	0	1	1	1	1	1	1	1	1	0	OG0000945	TRINITY_DN25234_c1_g2	TRINITY_DN17519_c2_g1	TRINITY_DN42943_c4_g1	TRINITY_DN24097_c1_g1	TRINITY_DN24325_c6_g1	TRINITY_DN14218_c1_g2	TRINITY_DN19409_c0_g2
OG0000946	TRINITY_DN1437_c0_g3, TRINITY_DN367_c0_g4	TRINITY_DN18164_c2_g1, TRINITY_DN19842_c6_g1	TRINITY_DN2582_c0_g2	TRINITY_DN14060_c0_g1	TRINITY_DN18259_c3_g5	TRINITY_DN23736_c7_g2	TRINITY_DN21151_c0_g2	TRINITY_DN19020_c5_g1, TRINITY_DN19287_c6_g4	TRINITY_DN45356_c1_g2, TRINITY_DN48550_c2_g1	OG0000946	2	2	1	1	1	1	1	2	2	0	OG0000946	TRINITY_DN1437_c0_g3	TRINITY_DN18164_c2_g1	TRINITY_DN2582_c0_g2	TRINITY_DN14060_c0_g1	TRINITY_DN18259_c3_g5	TRINITY_DN23736_c7_g2	TRINITY_DN21151_c0_g2	TRINITY_DN19020_c5_g1	TRINITY_DN45356_c1_g2	OG0000946	1	1	1	1	1	1	1	1	1	1	OG0000946	TRINITY_DN2582_c0_g2	TRINITY_DN18259_c3_g5	TRINITY_DN45356_c1_g2	TRINITY_DN23736_c7_g2	TRINITY_DN21151_c0_g2	TRINITY_DN14060_c0_g1	TRINITY_DN19020_c5_g1
OG0000947	TRINITY_DN493_c0_g1	TRINITY_DN21293_c1_g3	TRINITY_DN26117_c0_g1, TRINITY_DN3622_c0_g2	TRINITY_DN14684_c6_g7, TRINITY_DN14684_c6_g9	TRINITY_DN12208_c0_g1, TRINITY_DN459_c0_g1	TRINITY_DN15345_c0_g1	TRINITY_DN19490_c2_g3, TRINITY_DN5039_c0_g1	TRINITY_DN17564_c2_g1	TRINITY_DN72817_c0_g1	OG0000947	1	1	2	2	2	1	2	1	1	0	OG0000947	TRINITY_DN493_c0_g1	TRINITY_DN21293_c1_g3	TRINITY_DN3622_c0_g2	TRINITY_DN14684_c6_g7	TRINITY_DN459_c0_g1	TRINITY_DN15345_c0_g1	TRINITY_DN19490_c2_g3	TRINITY_DN17564_c2_g1	TRINITY_DN72817_c0_g1	OG0000947	1	1	1	1	1	1	1	1	1	1	OG0000947	TRINITY_DN3622_c0_g2	TRINITY_DN459_c0_g1	TRINITY_DN72817_c0_g1	TRINITY_DN15345_c0_g1	TRINITY_DN19490_c2_g3	TRINITY_DN14684_c6_g7	TRINITY_DN17564_c2_g1
OG0000948	TRINITY_DN33677_c1_g1	TRINITY_DN23417_c2_g2	TRINITY_DN26313_c2_g1, TRINITY_DN26313_c3_g1	TRINITY_DN17991_c7_g2	TRINITY_DN11932_c0_g1, TRINITY_DN19791_c4_g2	TRINITY_DN24585_c20_g1	TRINITY_DN22945_c5_g1	TRINITY_DN13887_c0_g1, TRINITY_DN33414_c0_g1	TRINITY_DN43887_c4_g2, TRINITY_DN43887_c4_g3	OG0000948	1	1	2	1	2	1	1	2	2	0	OG0000948	TRINITY_DN33677_c1_g1	TRINITY_DN23417_c2_g2	TRINITY_DN26313_c2_g1	TRINITY_DN17991_c7_g2	TRINITY_DN19791_c4_g2	TRINITY_DN24585_c20_g1	TRINITY_DN22945_c5_g1	TRINITY_DN13887_c0_g1	TRINITY_DN43887_c4_g2	OG0000948	1	1	1	1	1	1	1	1	1	1	OG0000948	TRINITY_DN26313_c2_g1	TRINITY_DN19791_c4_g2	TRINITY_DN43887_c4_g2	TRINITY_DN24585_c20_g1	TRINITY_DN22945_c5_g1	TRINITY_DN17991_c7_g2	TRINITY_DN13887_c0_g1
OG0000949	TRINITY_DN3729_c0_g2	TRINITY_DN18727_c4_g1, TRINITY_DN21773_c3_g1, TRINITY_DN22139_c0_g1	TRINITY_DN2736_c0_g1	TRINITY_DN19602_c0_g1	TRINITY_DN17960_c10_g1, TRINITY_DN18630_c5_g1	TRINITY_DN22384_c4_g6	TRINITY_DN22211_c9_g1, TRINITY_DN24503_c3_g1	TRINITY_DN19223_c5_g2	TRINITY_DN44087_c0_g1	OG0000949	1	3	1	1	2	1	2	1	1	0	OG0000949	TRINITY_DN3729_c0_g2	TRINITY_DN22139_c0_g1	TRINITY_DN2736_c0_g1	TRINITY_DN19602_c0_g1	TRINITY_DN17960_c10_g1	TRINITY_DN22384_c4_g6	TRINITY_DN22211_c9_g1	TRINITY_DN19223_c5_g2	TRINITY_DN44087_c0_g1	OG0000949	1	1	1	1	1	1	1	1	1	1	OG0000949	TRINITY_DN2736_c0_g1	TRINITY_DN17960_c10_g1	TRINITY_DN44087_c0_g1	TRINITY_DN22384_c4_g6	TRINITY_DN22211_c9_g1	TRINITY_DN19602_c0_g1	TRINITY_DN19223_c5_g2
OG0000950	TRINITY_DN1593_c2_g2	TRINITY_DN20666_c7_g1, TRINITY_DN22081_c13_g3, TRINITY_DN59166_c0_g1	TRINITY_DN2776_c1_g1		TRINITY_DN17478_c4_g2, TRINITY_DN19549_c5_g1	TRINITY_DN23774_c2_g2	TRINITY_DN20044_c8_g3	TRINITY_DN20007_c4_g1, TRINITY_DN20007_c4_g2	TRINITY_DN47256_c2_g1, TRINITY_DN47256_c2_g2	OG0000950	1	3	1	0	2	1	1	2	2	0	OG0000950	TRINITY_DN1593_c2_g2	TRINITY_DN22081_c13_g3	TRINITY_DN2776_c1_g1		TRINITY_DN17478_c4_g2	TRINITY_DN23774_c2_g2	TRINITY_DN20044_c8_g3	TRINITY_DN20007_c4_g2	TRINITY_DN47256_c2_g1	OG0000950	1	1	1	0	1	1	1	1	1	0	OG0000950	TRINITY_DN2776_c1_g1	TRINITY_DN17478_c4_g2	TRINITY_DN47256_c2_g1	TRINITY_DN23774_c2_g2	TRINITY_DN20044_c8_g3	TRINITY_UK00000_c0_g1	TRINITY_DN20007_c4_g2
OG0000951	TRINITY_DN2363_c0_g1	TRINITY_DN20727_c5_g5	TRINITY_DN2776_c3_g2	TRINITY_DN12986_c5_g1	TRINITY_DN17929_c6_g1	TRINITY_DN21729_c8_g2, TRINITY_DN21786_c4_g1	TRINITY_DN21134_c3_g1, TRINITY_DN23888_c2_g3	TRINITY_DN19683_c0_g2	TRINITY_DN35935_c0_g1, TRINITY_DN46746_c0_g1, TRINITY_DN49019_c2_g2	OG0000951	1	1	1	1	1	2	2	1	3	0	OG0000951	TRINITY_DN2363_c0_g1	TRINITY_DN20727_c5_g5	TRINITY_DN2776_c3_g2	TRINITY_DN12986_c5_g1	TRINITY_DN17929_c6_g1	TRINITY_DN21786_c4_g1	TRINITY_DN23888_c2_g3	TRINITY_DN19683_c0_g2	TRINITY_DN35935_c0_g1	OG0000951	1	1	1	1	1	1	1	1	1	1	OG0000951	TRINITY_DN2776_c3_g2	TRINITY_DN17929_c6_g1	TRINITY_DN35935_c0_g1	TRINITY_DN21786_c4_g1	TRINITY_DN23888_c2_g3	TRINITY_DN12986_c5_g1	TRINITY_DN19683_c0_g2
OG0000953	TRINITY_DN65028_c0_g1	TRINITY_DN17586_c0_g3	TRINITY_DN28036_c4_g1	TRINITY_DN35026_c0_g1	TRINITY_DN25142_c0_g1, TRINITY_DN3854_c0_g1, TRINITY_DN39741_c0_g1	TRINITY_DN54479_c0_g1	TRINITY_DN29071_c0_g1, TRINITY_DN31279_c0_g1	TRINITY_DN31005_c0_g1, TRINITY_DN7391_c0_g1	TRINITY_DN65558_c0_g1	OG0000953	1	1	1	1	3	1	2	2	1	0	OG0000953	TRINITY_DN65028_c0_g1	TRINITY_DN17586_c0_g3	TRINITY_DN28036_c4_g1	TRINITY_DN35026_c0_g1	TRINITY_DN3854_c0_g1	TRINITY_DN54479_c0_g1	TRINITY_DN29071_c0_g1	TRINITY_DN7391_c0_g1	TRINITY_DN65558_c0_g1	OG0000953	1	1	1	1	1	1	1	1	1	1	OG0000953	TRINITY_DN28036_c4_g1	TRINITY_DN3854_c0_g1	TRINITY_DN65558_c0_g1	TRINITY_DN54479_c0_g1	TRINITY_DN29071_c0_g1	TRINITY_DN35026_c0_g1	TRINITY_DN7391_c0_g1
OG0000955	TRINITY_DN3810_c1_g2	TRINITY_DN20263_c6_g1	TRINITY_DN29282_c4_g1	TRINITY_DN12392_c5_g1, TRINITY_DN28641_c0_g1	TRINITY_DN25058_c0_g1, TRINITY_DN28355_c0_g1	TRINITY_DN20536_c1_g1	TRINITY_DN37325_c0_g1, TRINITY_DN5900_c0_g1, TRINITY_DN858_c0_g1	TRINITY_DN17374_c0_g1	TRINITY_DN41240_c0_g1	OG0000955	1	1	1	2	2	1	3	1	1	0	OG0000955	TRINITY_DN3810_c1_g2	TRINITY_DN20263_c6_g1	TRINITY_DN29282_c4_g1	TRINITY_DN12392_c5_g1	TRINITY_DN28355_c0_g1	TRINITY_DN20536_c1_g1	TRINITY_DN858_c0_g1	TRINITY_DN17374_c0_g1	TRINITY_DN41240_c0_g1	OG0000955	1	1	1	1	1	1	1	1	1	1	OG0000955	TRINITY_DN29282_c4_g1	TRINITY_DN28355_c0_g1	TRINITY_DN41240_c0_g1	TRINITY_DN20536_c1_g1	TRINITY_DN858_c0_g1	TRINITY_DN12392_c5_g1	TRINITY_DN17374_c0_g1
OG0000956			TRINITY_DN29629_c3_g1	TRINITY_DN32482_c0_g1, TRINITY_DN34811_c0_g1	TRINITY_DN13479_c0_g1	TRINITY_DN29143_c0_g1	TRINITY_DN1025_c0_g1, TRINITY_DN28724_c0_g1	TRINITY_DN17866_c9_g5, TRINITY_DN22280_c0_g1, TRINITY_DN23981_c0_g1	TRINITY_DN39987_c0_g1, TRINITY_DN53911_c0_g1, TRINITY_DN84572_c0_g1	OG0000956	0	0	1	2	1	1	2	3	3	0	OG0000956			TRINITY_DN29629_c3_g1	TRINITY_DN32482_c0_g1	TRINITY_DN13479_c0_g1	TRINITY_DN29143_c0_g1	TRINITY_DN28724_c0_g1	TRINITY_DN22280_c0_g1	TRINITY_DN84572_c0_g1	OG0000956	0	0	1	1	1	1	1	1	1	0	OG0000956	TRINITY_DN29629_c3_g1	TRINITY_DN13479_c0_g1	TRINITY_DN84572_c0_g1	TRINITY_DN29143_c0_g1	TRINITY_DN28724_c0_g1	TRINITY_DN32482_c0_g1	TRINITY_DN22280_c0_g1
OG0000957	TRINITY_DN1129_c2_g2	TRINITY_DN23184_c5_g1, TRINITY_DN59811_c0_g1	TRINITY_DN29_c3_g2	TRINITY_DN13261_c3_g2, TRINITY_DN17103_c6_g2	TRINITY_DN18221_c4_g5, TRINITY_DN18221_c4_g9	TRINITY_DN24711_c9_g2	TRINITY_DN23137_c7_g1, TRINITY_DN24663_c7_g1	TRINITY_DN19256_c6_g1, TRINITY_DN21218_c5_g3		OG0000957	1	2	1	2	2	1	2	2	0	0	OG0000957	TRINITY_DN1129_c2_g2	TRINITY_DN23184_c5_g1	TRINITY_DN29_c3_g2	TRINITY_DN17103_c6_g2	TRINITY_DN18221_c4_g9	TRINITY_DN24711_c9_g2	TRINITY_DN24663_c7_g1	TRINITY_DN21218_c5_g3		OG0000957	1	1	1	1	1	1	1	1	0	0	OG0000957	TRINITY_DN29_c3_g2	TRINITY_DN18221_c4_g9	TRINITY_UK00000_c0_g1	TRINITY_DN24711_c9_g2	TRINITY_DN24663_c7_g1	TRINITY_DN17103_c6_g2	TRINITY_DN21218_c5_g3
OG0000958	TRINITY_DN1868_c1_g2	TRINITY_DN18835_c5_g2, TRINITY_DN41042_c0_g1, TRINITY_DN8994_c0_g1	TRINITY_DN3043_c0_g2	TRINITY_DN15794_c1_g1, TRINITY_DN23026_c0_g1	TRINITY_DN28435_c0_g1	TRINITY_DN23589_c1_g1	TRINITY_DN21443_c2_g1	TRINITY_DN16585_c0_g1, TRINITY_DN16585_c0_g2	TRINITY_DN44603_c0_g1	OG0000958	1	3	1	2	1	1	1	2	1	0	OG0000958	TRINITY_DN1868_c1_g2	TRINITY_DN18835_c5_g2	TRINITY_DN3043_c0_g2	TRINITY_DN15794_c1_g1	TRINITY_DN28435_c0_g1	TRINITY_DN23589_c1_g1	TRINITY_DN21443_c2_g1	TRINITY_DN16585_c0_g1	TRINITY_DN44603_c0_g1	OG0000958	1	1	1	1	1	1	1	1	1	1	OG0000958	TRINITY_DN3043_c0_g2	TRINITY_DN28435_c0_g1	TRINITY_DN44603_c0_g1	TRINITY_DN23589_c1_g1	TRINITY_DN21443_c2_g1	TRINITY_DN15794_c1_g1	TRINITY_DN16585_c0_g1
OG0000959	TRINITY_DN292_c2_g4	TRINITY_DN21925_c1_g2	TRINITY_DN304_c6_g1	TRINITY_DN13098_c8_g1	TRINITY_DN16911_c7_g3	TRINITY_DN23103_c4_g11, TRINITY_DN23103_c4_g16, TRINITY_DN23103_c4_g5	TRINITY_DN18707_c4_g1, TRINITY_DN24205_c3_g4	TRINITY_DN20076_c1_g1	TRINITY_DN43579_c0_g1, TRINITY_DN45799_c6_g1	OG0000959	1	1	1	1	1	3	2	1	2	0	OG0000959	TRINITY_DN292_c2_g4	TRINITY_DN21925_c1_g2	TRINITY_DN304_c6_g1	TRINITY_DN13098_c8_g1	TRINITY_DN16911_c7_g3	TRINITY_DN23103_c4_g5	TRINITY_DN24205_c3_g4	TRINITY_DN20076_c1_g1	TRINITY_DN43579_c0_g1	OG0000959	1	1	1	1	1	1	1	1	1	1	OG0000959	TRINITY_DN304_c6_g1	TRINITY_DN16911_c7_g3	TRINITY_DN43579_c0_g1	TRINITY_DN23103_c4_g5	TRINITY_DN24205_c3_g4	TRINITY_DN13098_c8_g1	TRINITY_DN20076_c1_g1
OG0000960	TRINITY_DN16660_c0_g1	TRINITY_DN20016_c10_g1	TRINITY_DN30806_c4_g1, TRINITY_DN30806_c8_g1	TRINITY_DN12865_c4_g1	TRINITY_DN16251_c8_g3	TRINITY_DN1346_c0_g1, TRINITY_DN16872_c0_g1, TRINITY_DN16872_c0_g3	TRINITY_DN14763_c0_g2, TRINITY_DN23709_c1_g1	TRINITY_DN20367_c5_g1	TRINITY_DN64393_c0_g1	OG0000960	1	1	2	1	1	3	2	1	1	0	OG0000960	TRINITY_DN16660_c0_g1	TRINITY_DN20016_c10_g1	TRINITY_DN30806_c4_g1	TRINITY_DN12865_c4_g1	TRINITY_DN16251_c8_g3	TRINITY_DN16872_c0_g1	TRINITY_DN23709_c1_g1	TRINITY_DN20367_c5_g1	TRINITY_DN64393_c0_g1	OG0000960	1	1	1	1	1	1	1	1	1	1	OG0000960	TRINITY_DN30806_c4_g1	TRINITY_DN16251_c8_g3	TRINITY_DN64393_c0_g1	TRINITY_DN16872_c0_g1	TRINITY_DN23709_c1_g1	TRINITY_DN12865_c4_g1	TRINITY_DN20367_c5_g1
OG0000961	TRINITY_DN7508_c0_g4	TRINITY_DN21031_c4_g2	TRINITY_DN3088_c0_g2	TRINITY_DN17594_c9_g1	TRINITY_DN17823_c9_g1, TRINITY_DN18232_c1_g1	TRINITY_DN23635_c10_g1	TRINITY_DN19403_c8_g1	TRINITY_DN20014_c4_g12, TRINITY_DN20014_c4_g3	TRINITY_DN46168_c0_g1, TRINITY_DN46195_c0_g1, TRINITY_DN48163_c0_g1	OG0000961	1	1	1	1	2	1	1	2	3	0	OG0000961	TRINITY_DN7508_c0_g4	TRINITY_DN21031_c4_g2	TRINITY_DN3088_c0_g2	TRINITY_DN17594_c9_g1	TRINITY_DN18232_c1_g1	TRINITY_DN23635_c10_g1	TRINITY_DN19403_c8_g1	TRINITY_DN20014_c4_g3	TRINITY_DN46168_c0_g1	OG0000961	1	1	1	1	1	1	1	1	1	1	OG0000961	TRINITY_DN3088_c0_g2	TRINITY_DN18232_c1_g1	TRINITY_DN46168_c0_g1	TRINITY_DN23635_c10_g1	TRINITY_DN19403_c8_g1	TRINITY_DN17594_c9_g1	TRINITY_DN20014_c4_g3
OG0000962	TRINITY_DN47_c2_g3	TRINITY_DN21862_c4_g1	TRINITY_DN309_c1_g1	TRINITY_DN19700_c8_g1, TRINITY_DN19700_c8_g3	TRINITY_DN19772_c3_g1	TRINITY_DN23153_c4_g1	TRINITY_DN25045_c2_g2	TRINITY_DN20887_c6_g3, TRINITY_DN20887_c6_g4, TRINITY_DN21173_c7_g3	TRINITY_DN43607_c7_g1, TRINITY_DN46868_c8_g1	OG0000962	1	1	1	2	1	1	1	3	2	0	OG0000962	TRINITY_DN47_c2_g3	TRINITY_DN21862_c4_g1	TRINITY_DN309_c1_g1	TRINITY_DN19700_c8_g3	TRINITY_DN19772_c3_g1	TRINITY_DN23153_c4_g1	TRINITY_DN25045_c2_g2	TRINITY_DN20887_c6_g3	TRINITY_DN46868_c8_g1	OG0000962	1	1	1	1	1	1	1	1	1	1	OG0000962	TRINITY_DN309_c1_g1	TRINITY_DN19772_c3_g1	TRINITY_DN46868_c8_g1	TRINITY_DN23153_c4_g1	TRINITY_DN25045_c2_g2	TRINITY_DN19700_c8_g3	TRINITY_DN20887_c6_g3
OG0000963	TRINITY_DN2966_c0_g1	TRINITY_DN23516_c8_g2	TRINITY_DN3110_c0_g2, TRINITY_DN362_c5_g1	TRINITY_DN13793_c4_g1	TRINITY_DN18856_c6_g1, TRINITY_DN18856_c6_g2	TRINITY_DN24079_c5_g3	TRINITY_DN19857_c8_g1	TRINITY_DN18735_c3_g1, TRINITY_DN20561_c6_g1	TRINITY_DN44410_c0_g1, TRINITY_DN46055_c0_g1	OG0000963	1	1	2	1	2	1	1	2	2	0	OG0000963	TRINITY_DN2966_c0_g1	TRINITY_DN23516_c8_g2	TRINITY_DN3110_c0_g2	TRINITY_DN13793_c4_g1	TRINITY_DN18856_c6_g1	TRINITY_DN24079_c5_g3	TRINITY_DN19857_c8_g1	TRINITY_DN20561_c6_g1	TRINITY_DN46055_c0_g1	OG0000963	1	1	1	1	1	1	1	1	1	1	OG0000963	TRINITY_DN3110_c0_g2	TRINITY_DN18856_c6_g1	TRINITY_DN46055_c0_g1	TRINITY_DN24079_c5_g3	TRINITY_DN19857_c8_g1	TRINITY_DN13793_c4_g1	TRINITY_DN20561_c6_g1
OG0000965	TRINITY_DN478_c1_g2	TRINITY_DN21160_c8_g1	TRINITY_DN3206_c0_g2, TRINITY_DN3206_c2_g1	TRINITY_DN12901_c7_g1, TRINITY_DN17173_c0_g2	TRINITY_DN19697_c4_g1, TRINITY_DN19697_c4_g2		TRINITY_DN21988_c0_g1, TRINITY_DN24241_c1_g1, TRINITY_DN24472_c7_g1	TRINITY_DN17960_c3_g2, TRINITY_DN17960_c3_g5		OG0000965	1	1	2	2	2	0	3	2	0	0	OG0000965	TRINITY_DN478_c1_g2	TRINITY_DN21160_c8_g1	TRINITY_DN3206_c0_g2	TRINITY_DN12901_c7_g1	TRINITY_DN19697_c4_g2		TRINITY_DN21988_c0_g1	TRINITY_DN17960_c3_g2		OG0000965	1	1	1	1	1	0	1	1	0	0	OG0000965	TRINITY_DN3206_c0_g2	TRINITY_DN19697_c4_g2	TRINITY_UK00000_c0_g1	TRINITY_UK00000_c0_g1	TRINITY_DN21988_c0_g1	TRINITY_DN12901_c7_g1	TRINITY_DN17960_c3_g2
OG0000966	TRINITY_DN2754_c2_g3, TRINITY_DN2754_c2_g4	TRINITY_DN22041_c2_g3	TRINITY_DN329_c4_g1	TRINITY_DN20519_c5_g1	TRINITY_DN17142_c4_g3	TRINITY_DN22565_c9_g1, TRINITY_DN24423_c1_g1	TRINITY_DN24120_c5_g2, TRINITY_DN24120_c5_g5, TRINITY_DN24120_c5_g9	TRINITY_DN21077_c9_g7	TRINITY_DN44841_c7_g1	OG0000966	2	1	1	1	1	2	3	1	1	0	OG0000966	TRINITY_DN2754_c2_g3	TRINITY_DN22041_c2_g3	TRINITY_DN329_c4_g1	TRINITY_DN20519_c5_g1	TRINITY_DN17142_c4_g3	TRINITY_DN22565_c9_g1	TRINITY_DN24120_c5_g5	TRINITY_DN21077_c9_g7	TRINITY_DN44841_c7_g1	OG0000966	1	1	1	1	1	1	1	1	1	1	OG0000966	TRINITY_DN329_c4_g1	TRINITY_DN17142_c4_g3	TRINITY_DN44841_c7_g1	TRINITY_DN22565_c9_g1	TRINITY_DN24120_c5_g5	TRINITY_DN20519_c5_g1	TRINITY_DN21077_c9_g7
OG0000967	TRINITY_DN6393_c1_g2	TRINITY_DN19902_c4_g3	TRINITY_DN33342_c11_g1, TRINITY_DN33342_c16_g1	TRINITY_DN13921_c5_g1	TRINITY_DN18203_c0_g1	TRINITY_DN25803_c0_g1, TRINITY_DN448_c0_g1	TRINITY_DN18478_c3_g3, TRINITY_DN37715_c0_g1	TRINITY_DN19099_c1_g1	TRINITY_DN22089_c0_g1, TRINITY_DN25841_c0_g1	OG0000967	1	1	2	1	1	2	2	1	2	0	OG0000967	TRINITY_DN6393_c1_g2	TRINITY_DN19902_c4_g3	TRINITY_DN33342_c11_g1	TRINITY_DN13921_c5_g1	TRINITY_DN18203_c0_g1	TRINITY_DN25803_c0_g1	TRINITY_DN18478_c3_g3	TRINITY_DN19099_c1_g1	TRINITY_DN22089_c0_g1	OG0000967	1	1	1	1	1	1	1	1	1	1	OG0000967	TRINITY_DN33342_c11_g1	TRINITY_DN18203_c0_g1	TRINITY_DN22089_c0_g1	TRINITY_DN25803_c0_g1	TRINITY_DN18478_c3_g3	TRINITY_DN13921_c5_g1	TRINITY_DN19099_c1_g1
OG0000968	TRINITY_DN48208_c0_g1	TRINITY_DN22913_c8_g2	TRINITY_DN33731_c1_g1, TRINITY_DN33731_c2_g1	TRINITY_DN10907_c0_g1, TRINITY_DN10907_c0_g2	TRINITY_DN45146_c0_g1	TRINITY_DN19835_c0_g1	TRINITY_DN31367_c0_g1, TRINITY_DN41937_c0_g1	TRINITY_DN45090_c0_g1	TRINITY_DN60157_c0_g1, TRINITY_DN89717_c0_g1	OG0000968	1	1	2	2	1	1	2	1	2	0	OG0000968	TRINITY_DN48208_c0_g1	TRINITY_DN22913_c8_g2	TRINITY_DN33731_c2_g1	TRINITY_DN10907_c0_g2	TRINITY_DN45146_c0_g1	TRINITY_DN19835_c0_g1	TRINITY_DN41937_c0_g1	TRINITY_DN45090_c0_g1	TRINITY_DN89717_c0_g1	OG0000968	1	1	1	1	1	1	1	1	1	1	OG0000968	TRINITY_DN33731_c2_g1	TRINITY_DN45146_c0_g1	TRINITY_DN89717_c0_g1	TRINITY_DN19835_c0_g1	TRINITY_DN41937_c0_g1	TRINITY_DN10907_c0_g2	TRINITY_DN45090_c0_g1
OG0000970	TRINITY_DN3141_c2_g2	TRINITY_DN20595_c2_g2	TRINITY_DN343_c2_g1	TRINITY_DN16047_c8_g1, TRINITY_DN18609_c3_g1		TRINITY_DN23596_c8_g1, TRINITY_DN23656_c5_g1	TRINITY_DN18164_c8_g1, TRINITY_DN22810_c1_g3	TRINITY_DN20011_c0_g1, TRINITY_DN20543_c7_g3	TRINITY_DN44267_c4_g1, TRINITY_DN45441_c2_g1	OG0000970	1	1	1	2	0	2	2	2	2	0	OG0000970	TRINITY_DN3141_c2_g2	TRINITY_DN20595_c2_g2	TRINITY_DN343_c2_g1	TRINITY_DN16047_c8_g1		TRINITY_DN23656_c5_g1	TRINITY_DN18164_c8_g1	TRINITY_DN20011_c0_g1	TRINITY_DN45441_c2_g1	OG0000970	1	1	1	1	0	1	1	1	1	0	OG0000970	TRINITY_DN343_c2_g1	TRINITY_UK00000_c0_g1	TRINITY_DN45441_c2_g1	TRINITY_DN23656_c5_g1	TRINITY_DN18164_c8_g1	TRINITY_DN16047_c8_g1	TRINITY_DN20011_c0_g1
OG0000971	TRINITY_DN191_c1_g2	TRINITY_DN40839_c0_g1	TRINITY_DN344_c0_g1	TRINITY_DN18244_c4_g2, TRINITY_DN21437_c4_g1	TRINITY_DN18044_c5_g1	TRINITY_DN23112_c4_g5	TRINITY_DN20620_c5_g1, TRINITY_DN20620_c5_g2, TRINITY_DN24563_c1_g1	TRINITY_DN19087_c2_g5, TRINITY_DN20389_c1_g1	TRINITY_DN46370_c5_g1	OG0000971	1	1	1	2	1	1	3	2	1	0	OG0000971	TRINITY_DN191_c1_g2	TRINITY_DN40839_c0_g1	TRINITY_DN344_c0_g1	TRINITY_DN21437_c4_g1	TRINITY_DN18044_c5_g1	TRINITY_DN23112_c4_g5	TRINITY_DN20620_c5_g1	TRINITY_DN19087_c2_g5	TRINITY_DN46370_c5_g1	OG0000971	1	1	1	1	1	1	1	1	1	1	OG0000971	TRINITY_DN344_c0_g1	TRINITY_DN18044_c5_g1	TRINITY_DN46370_c5_g1	TRINITY_DN23112_c4_g5	TRINITY_DN20620_c5_g1	TRINITY_DN21437_c4_g1	TRINITY_DN19087_c2_g5
OG0000972	TRINITY_DN3723_c0_g3	TRINITY_DN20115_c7_g2, TRINITY_DN22759_c6_g3	TRINITY_DN3456_c1_g2	TRINITY_DN16827_c8_g1	TRINITY_DN17087_c6_g1	TRINITY_DN23540_c6_g1, TRINITY_DN23743_c7_g1	TRINITY_DN19657_c6_g2, TRINITY_DN24889_c7_g1	TRINITY_DN18610_c3_g1	TRINITY_DN45331_c2_g1, TRINITY_DN48335_c7_g1	OG0000972	1	2	1	1	1	2	2	1	2	0	OG0000972	TRINITY_DN3723_c0_g3	TRINITY_DN22759_c6_g3	TRINITY_DN3456_c1_g2	TRINITY_DN16827_c8_g1	TRINITY_DN17087_c6_g1	TRINITY_DN23540_c6_g1	TRINITY_DN19657_c6_g2	TRINITY_DN18610_c3_g1	TRINITY_DN48335_c7_g1	OG0000972	1	1	1	1	1	1	1	1	1	1	OG0000972	TRINITY_DN3456_c1_g2	TRINITY_DN17087_c6_g1	TRINITY_DN48335_c7_g1	TRINITY_DN23540_c6_g1	TRINITY_DN19657_c6_g2	TRINITY_DN16827_c8_g1	TRINITY_DN18610_c3_g1
OG0000973	TRINITY_DN15103_c4_g1, TRINITY_DN15103_c7_g1	TRINITY_DN19522_c7_g2	TRINITY_DN35522_c0_g1	TRINITY_DN12132_c0_g1	TRINITY_DN10614_c0_g1, TRINITY_DN2865_c0_g1	TRINITY_DN14459_c0_g1, TRINITY_DN17333_c0_g2	TRINITY_DN21800_c0_g2	TRINITY_DN38394_c0_g1, TRINITY_DN45736_c0_g1	TRINITY_DN39458_c0_g1	OG0000973	2	1	1	1	2	2	1	2	1	0	OG0000973	TRINITY_DN15103_c7_g1	TRINITY_DN19522_c7_g2	TRINITY_DN35522_c0_g1	TRINITY_DN12132_c0_g1	TRINITY_DN10614_c0_g1	TRINITY_DN14459_c0_g1	TRINITY_DN21800_c0_g2	TRINITY_DN45736_c0_g1	TRINITY_DN39458_c0_g1	OG0000973	1	1	1	1	1	1	1	1	1	1	OG0000973	TRINITY_DN35522_c0_g1	TRINITY_DN10614_c0_g1	TRINITY_DN39458_c0_g1	TRINITY_DN14459_c0_g1	TRINITY_DN21800_c0_g2	TRINITY_DN12132_c0_g1	TRINITY_DN45736_c0_g1
OG0000974	TRINITY_DN464_c1_g1	TRINITY_DN22544_c3_g3, TRINITY_DN23837_c6_g2	TRINITY_DN364_c2_g1	TRINITY_DN17058_c3_g2	TRINITY_DN19405_c8_g1, TRINITY_DN19405_c8_g2, TRINITY_DN19586_c2_g1		TRINITY_DN21568_c6_g1, TRINITY_DN25016_c4_g5	TRINITY_DN19278_c1_g2	TRINITY_DN44100_c7_g1, TRINITY_DN48712_c1_g3	OG0000974	1	2	1	1	3	0	2	1	2	0	OG0000974	TRINITY_DN464_c1_g1	TRINITY_DN23837_c6_g2	TRINITY_DN364_c2_g1	TRINITY_DN17058_c3_g2	TRINITY_DN19586_c2_g1		TRINITY_DN21568_c6_g1	TRINITY_DN19278_c1_g2	TRINITY_DN48712_c1_g3	OG0000974	1	1	1	1	1	0	1	1	1	0	OG0000974	TRINITY_DN364_c2_g1	TRINITY_DN19586_c2_g1	TRINITY_DN48712_c1_g3	TRINITY_UK00000_c0_g1	TRINITY_DN21568_c6_g1	TRINITY_DN17058_c3_g2	TRINITY_DN19278_c1_g2
OG0000975	TRINITY_DN1603_c1_g2	TRINITY_DN23701_c5_g2, TRINITY_DN23701_c5_g3	TRINITY_DN3716_c2_g1	TRINITY_DN18488_c5_g1, TRINITY_DN20934_c4_g1	TRINITY_DN19504_c2_g3	TRINITY_DN24482_c0_g1	TRINITY_DN20999_c5_g1, TRINITY_DN21222_c1_g1	TRINITY_DN21287_c7_g1	TRINITY_DN45243_c3_g1, TRINITY_DN47756_c6_g1	OG0000975	1	2	1	2	1	1	2	1	2	0	OG0000975	TRINITY_DN1603_c1_g2	TRINITY_DN23701_c5_g3	TRINITY_DN3716_c2_g1	TRINITY_DN18488_c5_g1	TRINITY_DN19504_c2_g3	TRINITY_DN24482_c0_g1	TRINITY_DN20999_c5_g1	TRINITY_DN21287_c7_g1	TRINITY_DN47756_c6_g1	OG0000975	1	1	1	1	1	1	1	1	1	1	OG0000975	TRINITY_DN3716_c2_g1	TRINITY_DN19504_c2_g3	TRINITY_DN47756_c6_g1	TRINITY_DN24482_c0_g1	TRINITY_DN20999_c5_g1	TRINITY_DN18488_c5_g1	TRINITY_DN21287_c7_g1
OG0000976	TRINITY_DN352_c1_g1	TRINITY_DN19944_c3_g3, TRINITY_DN19944_c3_g8	TRINITY_DN3752_c0_g1	TRINITY_DN19289_c1_g1, TRINITY_DN19289_c1_g2, TRINITY_DN28513_c0_g1	TRINITY_DN17862_c4_g1	TRINITY_DN23196_c12_g1	TRINITY_DN25228_c4_g1, TRINITY_DN7793_c0_g1	TRINITY_DN19466_c4_g1	TRINITY_DN47327_c0_g1	OG0000976	1	2	1	3	1	1	2	1	1	0	OG0000976	TRINITY_DN352_c1_g1	TRINITY_DN19944_c3_g8	TRINITY_DN3752_c0_g1	TRINITY_DN19289_c1_g1	TRINITY_DN17862_c4_g1	TRINITY_DN23196_c12_g1	TRINITY_DN25228_c4_g1	TRINITY_DN19466_c4_g1	TRINITY_DN47327_c0_g1	OG0000976	1	1	1	1	1	1	1	1	1	1	OG0000976	TRINITY_DN3752_c0_g1	TRINITY_DN17862_c4_g1	TRINITY_DN47327_c0_g1	TRINITY_DN23196_c12_g1	TRINITY_DN25228_c4_g1	TRINITY_DN19289_c1_g1	TRINITY_DN19466_c4_g1
OG0000977	TRINITY_DN1937_c1_g5	TRINITY_DN22535_c6_g1	TRINITY_DN390_c0_g2	TRINITY_DN16878_c7_g1, TRINITY_DN19648_c5_g1	TRINITY_DN1034_c0_g1, TRINITY_DN19078_c7_g2	TRINITY_DN23830_c13_g1	TRINITY_DN19700_c9_g1	TRINITY_DN20315_c6_g1, TRINITY_DN21112_c12_g1	TRINITY_DN47492_c2_g1, TRINITY_DN48751_c8_g1	OG0000977	1	1	1	2	2	1	1	2	2	0	OG0000977	TRINITY_DN1937_c1_g5	TRINITY_DN22535_c6_g1	TRINITY_DN390_c0_g2	TRINITY_DN19648_c5_g1	TRINITY_DN19078_c7_g2	TRINITY_DN23830_c13_g1	TRINITY_DN19700_c9_g1	TRINITY_DN21112_c12_g1	TRINITY_DN48751_c8_g1	OG0000977	1	1	1	1	1	1	1	1	1	1	OG0000977	TRINITY_DN390_c0_g2	TRINITY_DN19078_c7_g2	TRINITY_DN48751_c8_g1	TRINITY_DN23830_c13_g1	TRINITY_DN19700_c9_g1	TRINITY_DN19648_c5_g1	TRINITY_DN21112_c12_g1
OG0000978	TRINITY_DN10624_c0_g1	TRINITY_DN18382_c6_g1	TRINITY_DN3926_c0_g4	TRINITY_DN19004_c9_g1	TRINITY_DN127_c0_g1, TRINITY_DN19675_c7_g12, TRINITY_DN2954_c0_g1	TRINITY_DN17219_c0_g1	TRINITY_DN25127_c6_g1	TRINITY_DN36838_c0_g1, TRINITY_DN45217_c0_g1, TRINITY_DN4885_c0_g1	TRINITY_DN41966_c0_g2	OG0000978	1	1	1	1	3	1	1	3	1	0	OG0000978	TRINITY_DN10624_c0_g1	TRINITY_DN18382_c6_g1	TRINITY_DN3926_c0_g4	TRINITY_DN19004_c9_g1	TRINITY_DN19675_c7_g12	TRINITY_DN17219_c0_g1	TRINITY_DN25127_c6_g1	TRINITY_DN4885_c0_g1	TRINITY_DN41966_c0_g2	OG0000978	1	1	1	1	1	1	1	1	1	1	OG0000978	TRINITY_DN3926_c0_g4	TRINITY_DN19675_c7_g12	TRINITY_DN41966_c0_g2	TRINITY_DN17219_c0_g1	TRINITY_DN25127_c6_g1	TRINITY_DN19004_c9_g1	TRINITY_DN4885_c0_g1
OG0000979		TRINITY_DN18293_c6_g1	TRINITY_DN392_c4_g1	TRINITY_DN13351_c3_g1, TRINITY_DN13351_c3_g5, TRINITY_DN20942_c4_g2	TRINITY_DN16836_c6_g1	TRINITY_DN24655_c8_g3	TRINITY_DN18205_c7_g1, TRINITY_DN21775_c7_g2	TRINITY_DN19370_c4_g1, TRINITY_DN19370_c4_g3	TRINITY_DN42767_c9_g1, TRINITY_DN45566_c1_g2	OG0000979	0	1	1	3	1	1	2	2	2	0	OG0000979		TRINITY_DN18293_c6_g1	TRINITY_DN392_c4_g1	TRINITY_DN13351_c3_g5	TRINITY_DN16836_c6_g1	TRINITY_DN24655_c8_g3	TRINITY_DN21775_c7_g2	TRINITY_DN19370_c4_g1	TRINITY_DN42767_c9_g1	OG0000979	0	1	1	1	1	1	1	1	1	0	OG0000979	TRINITY_DN392_c4_g1	TRINITY_DN16836_c6_g1	TRINITY_DN42767_c9_g1	TRINITY_DN24655_c8_g3	TRINITY_DN21775_c7_g2	TRINITY_DN13351_c3_g5	TRINITY_DN19370_c4_g1
OG0000980	TRINITY_DN2629_c1_g1	TRINITY_DN20781_c4_g7	TRINITY_DN398_c7_g2	TRINITY_DN18769_c5_g4	TRINITY_DN19371_c4_g1, TRINITY_DN19400_c5_g8	TRINITY_DN22600_c0_g1, TRINITY_DN23774_c2_g6	TRINITY_DN21954_c3_g2, TRINITY_DN25276_c5_g1	TRINITY_DN19960_c0_g1, TRINITY_DN20944_c5_g2	TRINITY_DN46893_c5_g1	OG0000980	1	1	1	1	2	2	2	2	1	0	OG0000980	TRINITY_DN2629_c1_g1	TRINITY_DN20781_c4_g7	TRINITY_DN398_c7_g2	TRINITY_DN18769_c5_g4	TRINITY_DN19400_c5_g8	TRINITY_DN22600_c0_g1	TRINITY_DN25276_c5_g1	TRINITY_DN19960_c0_g1	TRINITY_DN46893_c5_g1	OG0000980	1	1	1	1	1	1	1	1	1	1	OG0000980	TRINITY_DN398_c7_g2	TRINITY_DN19400_c5_g8	TRINITY_DN46893_c5_g1	TRINITY_DN22600_c0_g1	TRINITY_DN25276_c5_g1	TRINITY_DN18769_c5_g4	TRINITY_DN19960_c0_g1
OG0000982	TRINITY_DN6538_c0_g1	TRINITY_DN22305_c6_g1, TRINITY_DN44031_c0_g1	TRINITY_DN40261_c2_g1	TRINITY_DN13353_c7_g1	TRINITY_DN19282_c4_g8	TRINITY_DN1876_c0_g1, TRINITY_DN57972_c0_g1	TRINITY_DN19319_c11_g1, TRINITY_DN5899_c0_g1	TRINITY_DN20256_c4_g1	TRINITY_DN31567_c0_g1, TRINITY_DN31567_c0_g2	OG0000982	1	2	1	1	1	2	2	1	2	0	OG0000982	TRINITY_DN6538_c0_g1	TRINITY_DN22305_c6_g1	TRINITY_DN40261_c2_g1	TRINITY_DN13353_c7_g1	TRINITY_DN19282_c4_g8	TRINITY_DN57972_c0_g1	TRINITY_DN19319_c11_g1	TRINITY_DN20256_c4_g1	TRINITY_DN31567_c0_g1	OG0000982	1	1	1	1	1	1	1	1	1	1	OG0000982	TRINITY_DN40261_c2_g1	TRINITY_DN19282_c4_g8	TRINITY_DN31567_c0_g1	TRINITY_DN57972_c0_g1	TRINITY_DN19319_c11_g1	TRINITY_DN13353_c7_g1	TRINITY_DN20256_c4_g1
OG0000984	TRINITY_DN41678_c5_g1	TRINITY_DN19042_c8_g2	TRINITY_DN41597_c1_g1	TRINITY_DN20923_c5_g3	TRINITY_DN12162_c0_g1	TRINITY_DN43096_c0_g1	TRINITY_DN10401_c0_g1, TRINITY_DN47641_c0_g1	TRINITY_DN2080_c0_g1, TRINITY_DN44207_c0_g1	TRINITY_DN12203_c0_g1, TRINITY_DN5600_c0_g1, TRINITY_DN97144_c0_g1	OG0000984	1	1	1	1	1	1	2	2	3	0	OG0000984	TRINITY_DN41678_c5_g1	TRINITY_DN19042_c8_g2	TRINITY_DN41597_c1_g1	TRINITY_DN20923_c5_g3	TRINITY_DN12162_c0_g1	TRINITY_DN43096_c0_g1	TRINITY_DN47641_c0_g1	TRINITY_DN2080_c0_g1	TRINITY_DN97144_c0_g1	OG0000984	1	1	1	1	1	1	1	1	1	1	OG0000984	TRINITY_DN41597_c1_g1	TRINITY_DN12162_c0_g1	TRINITY_DN97144_c0_g1	TRINITY_DN43096_c0_g1	TRINITY_DN47641_c0_g1	TRINITY_DN20923_c5_g3	TRINITY_DN2080_c0_g1
OG0000985	TRINITY_DN295_c0_g1	TRINITY_DN12929_c0_g1, TRINITY_DN22915_c2_g2, TRINITY_DN50211_c0_g1	TRINITY_DN426_c0_g1	TRINITY_DN21262_c1_g1	TRINITY_DN16231_c4_g1	TRINITY_DN24617_c6_g1, TRINITY_DN24617_c6_g2	TRINITY_DN24768_c3_g1	TRINITY_DN21013_c6_g1	TRINITY_DN41689_c7_g1, TRINITY_DN48828_c1_g1	OG0000985	1	3	1	1	1	2	1	1	2	0	OG0000985	TRINITY_DN295_c0_g1	TRINITY_DN22915_c2_g2	TRINITY_DN426_c0_g1	TRINITY_DN21262_c1_g1	TRINITY_DN16231_c4_g1	TRINITY_DN24617_c6_g1	TRINITY_DN24768_c3_g1	TRINITY_DN21013_c6_g1	TRINITY_DN48828_c1_g1	OG0000985	1	1	1	1	1	1	1	1	1	1	OG0000985	TRINITY_DN426_c0_g1	TRINITY_DN16231_c4_g1	TRINITY_DN48828_c1_g1	TRINITY_DN24617_c6_g1	TRINITY_DN24768_c3_g1	TRINITY_DN21262_c1_g1	TRINITY_DN21013_c6_g1
OG0000991	TRINITY_DN1329_c1_g1	TRINITY_DN20372_c1_g1, TRINITY_DN48586_c0_g1	TRINITY_DN448_c1_g1	TRINITY_DN19099_c2_g1, TRINITY_DN19193_c7_g1	TRINITY_DN19718_c8_g1	TRINITY_DN24632_c4_g1	TRINITY_DN25096_c5_g1, TRINITY_DN25096_c5_g2	TRINITY_DN18210_c6_g2, TRINITY_DN20590_c5_g2	TRINITY_DN48653_c0_g2	OG0000991	1	2	1	2	1	1	2	2	1	0	OG0000991	TRINITY_DN1329_c1_g1	TRINITY_DN20372_c1_g1	TRINITY_DN448_c1_g1	TRINITY_DN19099_c2_g1	TRINITY_DN19718_c8_g1	TRINITY_DN24632_c4_g1	TRINITY_DN25096_c5_g2	TRINITY_DN18210_c6_g2	TRINITY_DN48653_c0_g2	OG0000991	1	1	1	1	1	1	1	1	1	1	OG0000991	TRINITY_DN448_c1_g1	TRINITY_DN19718_c8_g1	TRINITY_DN48653_c0_g2	TRINITY_DN24632_c4_g1	TRINITY_DN25096_c5_g2	TRINITY_DN19099_c2_g1	TRINITY_DN18210_c6_g2
OG0000992	TRINITY_DN1700_c2_g2	TRINITY_DN23057_c6_g1, TRINITY_DN58841_c0_g1	TRINITY_DN4508_c0_g2	TRINITY_DN19570_c5_g1	TRINITY_DN18645_c3_g2, TRINITY_DN18645_c3_g3	TRINITY_DN24439_c4_g1	TRINITY_DN22695_c0_g1, TRINITY_DN24587_c3_g1	TRINITY_DN20479_c2_g1, TRINITY_DN20479_c2_g2	TRINITY_DN48821_c0_g1	OG0000992	1	2	1	1	2	1	2	2	1	0	OG0000992	TRINITY_DN1700_c2_g2	TRINITY_DN23057_c6_g1	TRINITY_DN4508_c0_g2	TRINITY_DN19570_c5_g1	TRINITY_DN18645_c3_g2	TRINITY_DN24439_c4_g1	TRINITY_DN22695_c0_g1	TRINITY_DN20479_c2_g2	TRINITY_DN48821_c0_g1	OG0000992	1	1	1	1	1	1	1	1	1	1	OG0000992	TRINITY_DN4508_c0_g2	TRINITY_DN18645_c3_g2	TRINITY_DN48821_c0_g1	TRINITY_DN24439_c4_g1	TRINITY_DN22695_c0_g1	TRINITY_DN19570_c5_g1	TRINITY_DN20479_c2_g2
OG0000995	TRINITY_DN32515_c1_g1	TRINITY_DN17685_c0_g1, TRINITY_DN17685_c0_g2	TRINITY_DN4635_c2_g1	TRINITY_DN15127_c4_g2	TRINITY_DN17345_c2_g1	TRINITY_DN38369_c0_g1, TRINITY_DN9837_c0_g1	TRINITY_DN48756_c0_g1, TRINITY_DN5045_c0_g1	TRINITY_DN20464_c2_g1	TRINITY_DN7101_c0_g1, TRINITY_DN93215_c0_g1	OG0000995	1	2	1	1	1	2	2	1	2	0	OG0000995	TRINITY_DN32515_c1_g1	TRINITY_DN17685_c0_g2	TRINITY_DN4635_c2_g1	TRINITY_DN15127_c4_g2	TRINITY_DN17345_c2_g1	TRINITY_DN38369_c0_g1	TRINITY_DN48756_c0_g1	TRINITY_DN20464_c2_g1	TRINITY_DN93215_c0_g1	OG0000995	1	1	1	1	1	1	1	1	1	1	OG0000995	TRINITY_DN4635_c2_g1	TRINITY_DN17345_c2_g1	TRINITY_DN93215_c0_g1	TRINITY_DN38369_c0_g1	TRINITY_DN48756_c0_g1	TRINITY_DN15127_c4_g2	TRINITY_DN20464_c2_g1
OG0000996	TRINITY_DN68990_c1_g1	TRINITY_DN19024_c3_g1, TRINITY_DN47506_c0_g1	TRINITY_DN46510_c1_g1	TRINITY_DN21205_c7_g1	TRINITY_DN17480_c7_g3	TRINITY_DN21921_c9_g4	TRINITY_DN17683_c1_g1	TRINITY_DN19983_c1_g1, TRINITY_DN9033_c0_g1	TRINITY_DN31687_c0_g1, TRINITY_DN40363_c0_g2, TRINITY_DN40363_c0_g3	OG0000996	1	2	1	1	1	1	1	2	3	0	OG0000996	TRINITY_DN68990_c1_g1	TRINITY_DN19024_c3_g1	TRINITY_DN46510_c1_g1	TRINITY_DN21205_c7_g1	TRINITY_DN17480_c7_g3	TRINITY_DN21921_c9_g4	TRINITY_DN17683_c1_g1	TRINITY_DN19983_c1_g1	TRINITY_DN40363_c0_g2	OG0000996	1	1	1	1	1	1	1	1	1	1	OG0000996	TRINITY_DN46510_c1_g1	TRINITY_DN17480_c7_g3	TRINITY_DN40363_c0_g2	TRINITY_DN21921_c9_g4	TRINITY_DN17683_c1_g1	TRINITY_DN21205_c7_g1	TRINITY_DN19983_c1_g1
OG0000997	TRINITY_DN1940_c1_g1	TRINITY_DN20340_c7_g1	TRINITY_DN46_c8_g1	TRINITY_DN15354_c4_g1, TRINITY_DN15354_c4_g3, TRINITY_DN15354_c4_g4	TRINITY_DN18662_c3_g1, TRINITY_DN18693_c6_g1	TRINITY_DN21983_c3_g2	TRINITY_DN24459_c1_g1	TRINITY_DN20021_c1_g1, TRINITY_DN20021_c1_g2	TRINITY_DN47844_c2_g4	OG0000997	1	1	1	3	2	1	1	2	1	0	OG0000997	TRINITY_DN1940_c1_g1	TRINITY_DN20340_c7_g1	TRINITY_DN46_c8_g1	TRINITY_DN15354_c4_g3	TRINITY_DN18662_c3_g1	TRINITY_DN21983_c3_g2	TRINITY_DN24459_c1_g1	TRINITY_DN20021_c1_g2	TRINITY_DN47844_c2_g4	OG0000997	1	1	1	1	1	1	1	1	1	1	OG0000997	TRINITY_DN46_c8_g1	TRINITY_DN18662_c3_g1	TRINITY_DN47844_c2_g4	TRINITY_DN21983_c3_g2	TRINITY_DN24459_c1_g1	TRINITY_DN15354_c4_g3	TRINITY_DN20021_c1_g2
OG0000998	TRINITY_DN5565_c0_g1	TRINITY_DN21145_c3_g4	TRINITY_DN4747_c0_g3	TRINITY_DN17900_c5_g2, TRINITY_DN17900_c5_g3, TRINITY_DN17900_c5_g7	TRINITY_DN18750_c3_g1	TRINITY_DN24620_c1_g3	TRINITY_DN24354_c4_g1, TRINITY_DN25112_c5_g1	TRINITY_DN19943_c4_g1, TRINITY_DN19943_c4_g6	TRINITY_DN47288_c2_g1	OG0000998	1	1	1	3	1	1	2	2	1	0	OG0000998	TRINITY_DN5565_c0_g1	TRINITY_DN21145_c3_g4	TRINITY_DN4747_c0_g3	TRINITY_DN17900_c5_g2	TRINITY_DN18750_c3_g1	TRINITY_DN24620_c1_g3	TRINITY_DN24354_c4_g1	TRINITY_DN19943_c4_g1	TRINITY_DN47288_c2_g1	OG0000998	1	1	1	1	1	1	1	1	1	1	OG0000998	TRINITY_DN4747_c0_g3	TRINITY_DN18750_c3_g1	TRINITY_DN47288_c2_g1	TRINITY_DN24620_c1_g3	TRINITY_DN24354_c4_g1	TRINITY_DN17900_c5_g2	TRINITY_DN19943_c4_g1
OG0001000		TRINITY_DN23268_c10_g3	TRINITY_DN478_c1_g2	TRINITY_DN15630_c7_g1, TRINITY_DN17780_c5_g1	TRINITY_DN19509_c7_g1	TRINITY_DN24097_c1_g2, TRINITY_DN24097_c1_g3	TRINITY_DN25145_c4_g3, TRINITY_DN25145_c4_g4	TRINITY_DN19429_c2_g1, TRINITY_DN20252_c1_g1, TRINITY_DN20252_c1_g3	TRINITY_DN48535_c5_g2	OG0001000	0	1	1	2	1	2	2	3	1	0	OG0001000		TRINITY_DN23268_c10_g3	TRINITY_DN478_c1_g2	TRINITY_DN17780_c5_g1	TRINITY_DN19509_c7_g1	TRINITY_DN24097_c1_g2	TRINITY_DN25145_c4_g4	TRINITY_DN20252_c1_g1	TRINITY_DN48535_c5_g2	OG0001000	0	1	1	1	1	1	1	1	1	0	OG0001000	TRINITY_DN478_c1_g2	TRINITY_DN19509_c7_g1	TRINITY_DN48535_c5_g2	TRINITY_DN24097_c1_g2	TRINITY_DN25145_c4_g4	TRINITY_DN17780_c5_g1	TRINITY_DN20252_c1_g1
OG0001001	TRINITY_DN10210_c0_g2	TRINITY_DN22925_c6_g2, TRINITY_DN22925_c8_g1	TRINITY_DN4794_c0_g1	TRINITY_DN14165_c9_g1, TRINITY_DN20102_c1_g1	TRINITY_DN18845_c2_g1, TRINITY_DN5150_c0_g1	TRINITY_DN24454_c11_g1	TRINITY_DN22309_c9_g1, TRINITY_DN24710_c7_g2	TRINITY_DN17339_c0_g1	TRINITY_DN40698_c0_g1	OG0001001	1	2	1	2	2	1	2	1	1	0	OG0001001	TRINITY_DN10210_c0_g2	TRINITY_DN22925_c6_g2	TRINITY_DN4794_c0_g1	TRINITY_DN20102_c1_g1	TRINITY_DN18845_c2_g1	TRINITY_DN24454_c11_g1	TRINITY_DN24710_c7_g2	TRINITY_DN17339_c0_g1	TRINITY_DN40698_c0_g1	OG0001001	1	1	1	1	1	1	1	1	1	1	OG0001001	TRINITY_DN4794_c0_g1	TRINITY_DN18845_c2_g1	TRINITY_DN40698_c0_g1	TRINITY_DN24454_c11_g1	TRINITY_DN24710_c7_g2	TRINITY_DN20102_c1_g1	TRINITY_DN17339_c0_g1
OG0001002	TRINITY_DN1851_c0_g2	TRINITY_DN23413_c0_g2, TRINITY_DN36442_c0_g1	TRINITY_DN4846_c0_g8, TRINITY_DN6524_c1_g1		TRINITY_DN17872_c12_g1	TRINITY_DN21905_c10_g1, TRINITY_DN27681_c0_g1	TRINITY_DN24565_c0_g1	TRINITY_DN20245_c4_g2	TRINITY_DN42767_c6_g1, TRINITY_DN42767_c6_g4, TRINITY_DN77130_c0_g1	OG0001002	1	2	2	0	1	2	1	1	3	0	OG0001002	TRINITY_DN1851_c0_g2	TRINITY_DN23413_c0_g2	TRINITY_DN4846_c0_g8		TRINITY_DN17872_c12_g1	TRINITY_DN21905_c10_g1	TRINITY_DN24565_c0_g1	TRINITY_DN20245_c4_g2	TRINITY_DN77130_c0_g1	OG0001002	1	1	1	0	1	1	1	1	1	0	OG0001002	TRINITY_DN4846_c0_g8	TRINITY_DN17872_c12_g1	TRINITY_DN77130_c0_g1	TRINITY_DN21905_c10_g1	TRINITY_DN24565_c0_g1	TRINITY_UK00000_c0_g1	TRINITY_DN20245_c4_g2
OG0001004	TRINITY_DN12176_c3_g1	TRINITY_DN23388_c1_g1	TRINITY_DN4972_c0_g1, TRINITY_DN4972_c4_g1	TRINITY_DN12500_c0_g1	TRINITY_DN10989_c0_g1	TRINITY_DN14246_c0_g1, TRINITY_DN15789_c0_g2	TRINITY_DN20624_c6_g2	TRINITY_DN22712_c0_g1, TRINITY_DN35841_c0_g1	TRINITY_DN12493_c0_g1, TRINITY_DN75336_c0_g1	OG0001004	1	1	2	1	1	2	1	2	2	0	OG0001004	TRINITY_DN12176_c3_g1	TRINITY_DN23388_c1_g1	TRINITY_DN4972_c0_g1	TRINITY_DN12500_c0_g1	TRINITY_DN10989_c0_g1	TRINITY_DN15789_c0_g2	TRINITY_DN20624_c6_g2	TRINITY_DN35841_c0_g1	TRINITY_DN75336_c0_g1	OG0001004	1	1	1	1	1	1	1	1	1	1	OG0001004	TRINITY_DN4972_c0_g1	TRINITY_DN10989_c0_g1	TRINITY_DN75336_c0_g1	TRINITY_DN15789_c0_g2	TRINITY_DN20624_c6_g2	TRINITY_DN12500_c0_g1	TRINITY_DN35841_c0_g1
OG0001005	TRINITY_DN3552_c0_g2	TRINITY_DN23262_c22_g1, TRINITY_DN33612_c0_g1	TRINITY_DN4979_c0_g3, TRINITY_DN4979_c0_g4	TRINITY_DN15908_c8_g1	TRINITY_DN16725_c1_g2, TRINITY_DN21715_c0_g1, TRINITY_DN22439_c0_g1	TRINITY_DN24221_c3_g1	TRINITY_DN18206_c5_g1	TRINITY_DN18294_c8_g2	TRINITY_DN45666_c2_g1	OG0001005	1	2	2	1	3	1	1	1	1	0	OG0001005	TRINITY_DN3552_c0_g2	TRINITY_DN23262_c22_g1	TRINITY_DN4979_c0_g4	TRINITY_DN15908_c8_g1	TRINITY_DN16725_c1_g2	TRINITY_DN24221_c3_g1	TRINITY_DN18206_c5_g1	TRINITY_DN18294_c8_g2	TRINITY_DN45666_c2_g1	OG0001005	1	1	1	1	1	1	1	1	1	1	OG0001005	TRINITY_DN4979_c0_g4	TRINITY_DN16725_c1_g2	TRINITY_DN45666_c2_g1	TRINITY_DN24221_c3_g1	TRINITY_DN18206_c5_g1	TRINITY_DN15908_c8_g1	TRINITY_DN18294_c8_g2
OG0001006	TRINITY_DN686_c0_g1	TRINITY_DN21948_c1_g1	TRINITY_DN4990_c0_g1, TRINITY_DN4990_c1_g2		TRINITY_DN15610_c0_g1, TRINITY_DN15610_c0_g2	TRINITY_DN21487_c12_g1	TRINITY_DN21549_c2_g3	TRINITY_DN15942_c0_g1, TRINITY_DN15942_c0_g3, TRINITY_DN15942_c0_g4	TRINITY_DN38462_c0_g1, TRINITY_DN71489_c0_g1	OG0001006	1	1	2	0	2	1	1	3	2	0	OG0001006	TRINITY_DN686_c0_g1	TRINITY_DN21948_c1_g1	TRINITY_DN4990_c1_g2		TRINITY_DN15610_c0_g2	TRINITY_DN21487_c12_g1	TRINITY_DN21549_c2_g3	TRINITY_DN15942_c0_g4	TRINITY_DN38462_c0_g1	OG0001006	1	1	1	0	1	1	1	1	1	0	OG0001006	TRINITY_DN4990_c1_g2	TRINITY_DN15610_c0_g2	TRINITY_DN38462_c0_g1	TRINITY_DN21487_c12_g1	TRINITY_DN21549_c2_g3	TRINITY_UK00000_c0_g1	TRINITY_DN15942_c0_g4
OG0001007	TRINITY_DN2911_c2_g1	TRINITY_DN20686_c4_g1	TRINITY_DN499_c0_g1	TRINITY_DN18805_c5_g1, TRINITY_DN19534_c3_g1	TRINITY_DN19739_c5_g1	TRINITY_DN23245_c8_g1	TRINITY_DN20276_c1_g3, TRINITY_DN24516_c4_g4	TRINITY_DN19940_c10_g1, TRINITY_DN20265_c8_g2	TRINITY_DN47676_c5_g1, TRINITY_DN48614_c1_g1	OG0001007	1	1	1	2	1	1	2	2	2	0	OG0001007	TRINITY_DN2911_c2_g1	TRINITY_DN20686_c4_g1	TRINITY_DN499_c0_g1	TRINITY_DN18805_c5_g1	TRINITY_DN19739_c5_g1	TRINITY_DN23245_c8_g1	TRINITY_DN24516_c4_g4	TRINITY_DN19940_c10_g1	TRINITY_DN48614_c1_g1	OG0001007	1	1	1	1	1	1	1	1	1	1	OG0001007	TRINITY_DN499_c0_g1	TRINITY_DN19739_c5_g1	TRINITY_DN48614_c1_g1	TRINITY_DN23245_c8_g1	TRINITY_DN24516_c4_g4	TRINITY_DN18805_c5_g1	TRINITY_DN19940_c10_g1
OG0001009	TRINITY_DN352_c3_g1	TRINITY_DN23266_c8_g2, TRINITY_DN23266_c8_g5	TRINITY_DN505_c2_g3	TRINITY_DN14809_c4_g2	TRINITY_DN19711_c4_g2, TRINITY_DN19711_c4_g6	TRINITY_DN23325_c6_g1, TRINITY_DN23325_c6_g8	TRINITY_DN25259_c2_g1	TRINITY_DN21195_c8_g1, TRINITY_DN21195_c8_g2	TRINITY_DN46772_c2_g1	OG0001009	1	2	1	1	2	2	1	2	1	0	OG0001009	TRINITY_DN352_c3_g1	TRINITY_DN23266_c8_g5	TRINITY_DN505_c2_g3	TRINITY_DN14809_c4_g2	TRINITY_DN19711_c4_g2	TRINITY_DN23325_c6_g8	TRINITY_DN25259_c2_g1	TRINITY_DN21195_c8_g1	TRINITY_DN46772_c2_g1	OG0001009	1	1	1	1	1	1	1	1	1	1	OG0001009	TRINITY_DN505_c2_g3	TRINITY_DN19711_c4_g2	TRINITY_DN46772_c2_g1	TRINITY_DN23325_c6_g8	TRINITY_DN25259_c2_g1	TRINITY_DN14809_c4_g2	TRINITY_DN21195_c8_g1
OG0001010	TRINITY_DN3469_c0_g1	TRINITY_DN20124_c4_g3, TRINITY_DN20124_c4_g7	TRINITY_DN521_c4_g2	TRINITY_DN12857_c3_g1, TRINITY_DN19429_c8_g1	TRINITY_DN18277_c7_g1	TRINITY_DN23785_c7_g1	TRINITY_DN24774_c5_g1	TRINITY_DN18507_c4_g2, TRINITY_DN18507_c4_g3	TRINITY_DN41962_c6_g1, TRINITY_DN45016_c1_g4	OG0001010	1	2	1	2	1	1	1	2	2	0	OG0001010	TRINITY_DN3469_c0_g1	TRINITY_DN20124_c4_g7	TRINITY_DN521_c4_g2	TRINITY_DN19429_c8_g1	TRINITY_DN18277_c7_g1	TRINITY_DN23785_c7_g1	TRINITY_DN24774_c5_g1	TRINITY_DN18507_c4_g2	TRINITY_DN41962_c6_g1	OG0001010	1	1	1	1	1	1	1	1	1	1	OG0001010	TRINITY_DN521_c4_g2	TRINITY_DN18277_c7_g1	TRINITY_DN41962_c6_g1	TRINITY_DN23785_c7_g1	TRINITY_DN24774_c5_g1	TRINITY_DN19429_c8_g1	TRINITY_DN18507_c4_g2
OG0001011	TRINITY_DN456_c3_g2, TRINITY_DN456_c3_g3	TRINITY_DN20882_c7_g2	TRINITY_DN5300_c0_g1	TRINITY_DN14266_c5_g2	TRINITY_DN19730_c3_g1	TRINITY_DN10384_c0_g1, TRINITY_DN10384_c0_g2	TRINITY_DN2089_c0_g1, TRINITY_DN22540_c4_g1	TRINITY_DN15321_c0_g1, TRINITY_DN15321_c0_g2	TRINITY_DN31227_c0_g1	OG0001011	2	1	1	1	1	2	2	2	1	0	OG0001011	TRINITY_DN456_c3_g2	TRINITY_DN20882_c7_g2	TRINITY_DN5300_c0_g1	TRINITY_DN14266_c5_g2	TRINITY_DN19730_c3_g1	TRINITY_DN10384_c0_g2	TRINITY_DN2089_c0_g1	TRINITY_DN15321_c0_g1	TRINITY_DN31227_c0_g1	OG0001011	1	1	1	1	1	1	1	1	1	1	OG0001011	TRINITY_DN5300_c0_g1	TRINITY_DN19730_c3_g1	TRINITY_DN31227_c0_g1	TRINITY_DN10384_c0_g2	TRINITY_DN2089_c0_g1	TRINITY_DN14266_c5_g2	TRINITY_DN15321_c0_g1
OG0001012	TRINITY_DN5024_c0_g2	TRINITY_DN19011_c6_g5	TRINITY_DN540_c8_g1, TRINITY_DN6830_c2_g1	TRINITY_DN14244_c4_g1	TRINITY_DN17925_c5_g1, TRINITY_DN17925_c5_g4	TRINITY_DN22091_c3_g1	TRINITY_DN24073_c9_g5, TRINITY_DN24182_c2_g1	TRINITY_DN18438_c5_g1	TRINITY_DN47944_c2_g1, TRINITY_DN47944_c2_g5	OG0001012	1	1	2	1	2	1	2	1	2	0	OG0001012	TRINITY_DN5024_c0_g2	TRINITY_DN19011_c6_g5	TRINITY_DN6830_c2_g1	TRINITY_DN14244_c4_g1	TRINITY_DN17925_c5_g4	TRINITY_DN22091_c3_g1	TRINITY_DN24182_c2_g1	TRINITY_DN18438_c5_g1	TRINITY_DN47944_c2_g5	OG0001012	1	1	1	1	1	1	1	1	1	1	OG0001012	TRINITY_DN6830_c2_g1	TRINITY_DN17925_c5_g4	TRINITY_DN47944_c2_g5	TRINITY_DN22091_c3_g1	TRINITY_DN24182_c2_g1	TRINITY_DN14244_c4_g1	TRINITY_DN18438_c5_g1
OG0001013	TRINITY_DN5307_c0_g2	TRINITY_DN18830_c1_g1	TRINITY_DN5642_c0_g1	TRINITY_DN13644_c5_g2	TRINITY_DN18144_c3_g1, TRINITY_DN18144_c3_g2, TRINITY_DN18783_c6_g1	TRINITY_DN24666_c9_g2	TRINITY_DN22210_c6_g1	TRINITY_DN18136_c1_g1, TRINITY_DN19027_c5_g1	TRINITY_DN22721_c0_g1, TRINITY_DN42003_c0_g1	OG0001013	1	1	1	1	3	1	1	2	2	0	OG0001013	TRINITY_DN5307_c0_g2	TRINITY_DN18830_c1_g1	TRINITY_DN5642_c0_g1	TRINITY_DN13644_c5_g2	TRINITY_DN18144_c3_g1	TRINITY_DN24666_c9_g2	TRINITY_DN22210_c6_g1	TRINITY_DN18136_c1_g1	TRINITY_DN42003_c0_g1	OG0001013	1	1	1	1	1	1	1	1	1	1	OG0001013	TRINITY_DN5642_c0_g1	TRINITY_DN18144_c3_g1	TRINITY_DN42003_c0_g1	TRINITY_DN24666_c9_g2	TRINITY_DN22210_c6_g1	TRINITY_DN13644_c5_g2	TRINITY_DN18136_c1_g1
OG0001014	TRINITY_DN4569_c0_g5, TRINITY_DN45_c0_g1	TRINITY_DN19788_c6_g1	TRINITY_DN566_c0_g4	TRINITY_DN18847_c3_g2	TRINITY_DN18413_c1_g1, TRINITY_DN19368_c3_g3	TRINITY_DN22599_c9_g1	TRINITY_DN21587_c10_g2	TRINITY_DN19254_c7_g5, TRINITY_DN19255_c8_g1	TRINITY_DN45122_c3_g1, TRINITY_DN46132_c4_g1	OG0001014	2	1	1	1	2	1	1	2	2	0	OG0001014	TRINITY_DN4569_c0_g5	TRINITY_DN19788_c6_g1	TRINITY_DN566_c0_g4	TRINITY_DN18847_c3_g2	TRINITY_DN19368_c3_g3	TRINITY_DN22599_c9_g1	TRINITY_DN21587_c10_g2	TRINITY_DN19254_c7_g5	TRINITY_DN46132_c4_g1	OG0001014	1	1	1	1	1	1	1	1	1	1	OG0001014	TRINITY_DN566_c0_g4	TRINITY_DN19368_c3_g3	TRINITY_DN46132_c4_g1	TRINITY_DN22599_c9_g1	TRINITY_DN21587_c10_g2	TRINITY_DN18847_c3_g2	TRINITY_DN19254_c7_g5
OG0001015	TRINITY_DN2155_c2_g3	TRINITY_DN18966_c7_g1, TRINITY_DN18966_c7_g7	TRINITY_DN572_c0_g1	TRINITY_DN18929_c7_g1, TRINITY_DN21178_c5_g1	TRINITY_DN18838_c6_g1	TRINITY_DN21852_c9_g1, TRINITY_DN21852_c9_g3	TRINITY_DN20824_c7_g1	TRINITY_DN19098_c6_g2, TRINITY_DN20817_c6_g2	TRINITY_DN46805_c1_g2	OG0001015	1	2	1	2	1	2	1	2	1	0	OG0001015	TRINITY_DN2155_c2_g3	TRINITY_DN18966_c7_g7	TRINITY_DN572_c0_g1	TRINITY_DN21178_c5_g1	TRINITY_DN18838_c6_g1	TRINITY_DN21852_c9_g3	TRINITY_DN20824_c7_g1	TRINITY_DN20817_c6_g2	TRINITY_DN46805_c1_g2	OG0001015	1	1	1	1	1	1	1	1	1	1	OG0001015	TRINITY_DN572_c0_g1	TRINITY_DN18838_c6_g1	TRINITY_DN46805_c1_g2	TRINITY_DN21852_c9_g3	TRINITY_DN20824_c7_g1	TRINITY_DN21178_c5_g1	TRINITY_DN20817_c6_g2
OG0001016	TRINITY_DN2501_c2_g1	TRINITY_DN18784_c8_g2, TRINITY_DN62084_c0_g1	TRINITY_DN575_c0_g1	TRINITY_DN18146_c3_g1	TRINITY_DN16271_c2_g4, TRINITY_DN16349_c8_g2	TRINITY_DN24364_c3_g2, TRINITY_DN24364_c3_g8	TRINITY_DN24294_c4_g1	TRINITY_DN18789_c0_g1	TRINITY_DN45146_c1_g1, TRINITY_DN48433_c1_g1	OG0001016	1	2	1	1	2	2	1	1	2	0	OG0001016	TRINITY_DN2501_c2_g1	TRINITY_DN18784_c8_g2	TRINITY_DN575_c0_g1	TRINITY_DN18146_c3_g1	TRINITY_DN16349_c8_g2	TRINITY_DN24364_c3_g2	TRINITY_DN24294_c4_g1	TRINITY_DN18789_c0_g1	TRINITY_DN48433_c1_g1	OG0001016	1	1	1	1	1	1	1	1	1	1	OG0001016	TRINITY_DN575_c0_g1	TRINITY_DN16349_c8_g2	TRINITY_DN48433_c1_g1	TRINITY_DN24364_c3_g2	TRINITY_DN24294_c4_g1	TRINITY_DN18146_c3_g1	TRINITY_DN18789_c0_g1
OG0001018	TRINITY_DN8293_c0_g1	TRINITY_DN16576_c0_g1, TRINITY_DN18398_c1_g1, TRINITY_DN63323_c0_g1	TRINITY_DN6157_c0_g2	TRINITY_DN19425_c1_g1	TRINITY_DN5398_c0_g1, TRINITY_DN6804_c0_g1	TRINITY_DN2040_c0_g1, TRINITY_DN30618_c0_g1	TRINITY_DN11570_c0_g1	TRINITY_DN10084_c0_g1	TRINITY_DN47352_c2_g1	OG0001018	1	3	1	1	2	2	1	1	1	0	OG0001018	TRINITY_DN8293_c0_g1	TRINITY_DN16576_c0_g1	TRINITY_DN6157_c0_g2	TRINITY_DN19425_c1_g1	TRINITY_DN6804_c0_g1	TRINITY_DN2040_c0_g1	TRINITY_DN11570_c0_g1	TRINITY_DN10084_c0_g1	TRINITY_DN47352_c2_g1	OG0001018	1	1	1	1	1	1	1	1	1	1	OG0001018	TRINITY_DN6157_c0_g2	TRINITY_DN6804_c0_g1	TRINITY_DN47352_c2_g1	TRINITY_DN2040_c0_g1	TRINITY_DN11570_c0_g1	TRINITY_DN19425_c1_g1	TRINITY_DN10084_c0_g1
OG0001019	TRINITY_DN1995_c1_g3	TRINITY_DN21284_c5_g4	TRINITY_DN6163_c5_g1	TRINITY_DN16667_c5_g3	TRINITY_DN19587_c8_g1	TRINITY_DN24234_c5_g2, TRINITY_DN24234_c5_g3	TRINITY_DN18820_c7_g4, TRINITY_DN18921_c6_g1	TRINITY_DN19691_c3_g1, TRINITY_DN20413_c3_g2	TRINITY_DN43031_c10_g1, TRINITY_DN43031_c10_g4	OG0001019	1	1	1	1	1	2	2	2	2	0	OG0001019	TRINITY_DN1995_c1_g3	TRINITY_DN21284_c5_g4	TRINITY_DN6163_c5_g1	TRINITY_DN16667_c5_g3	TRINITY_DN19587_c8_g1	TRINITY_DN24234_c5_g2	TRINITY_DN18921_c6_g1	TRINITY_DN20413_c3_g2	TRINITY_DN43031_c10_g1	OG0001019	1	1	1	1	1	1	1	1	1	1	OG0001019	TRINITY_DN6163_c5_g1	TRINITY_DN19587_c8_g1	TRINITY_DN43031_c10_g1	TRINITY_DN24234_c5_g2	TRINITY_DN18921_c6_g1	TRINITY_DN16667_c5_g3	TRINITY_DN20413_c3_g2
OG0001020	TRINITY_DN5185_c0_g1	TRINITY_DN22930_c3_g2	TRINITY_DN616_c10_g1, TRINITY_DN861_c1_g2	TRINITY_DN15362_c5_g1	TRINITY_DN16316_c8_g8, TRINITY_DN16338_c5_g1	TRINITY_DN24004_c6_g1, TRINITY_DN24004_c6_g4	TRINITY_DN17559_c0_g1	TRINITY_DN19433_c5_g1, TRINITY_DN19433_c5_g2	TRINITY_DN42471_c1_g1	OG0001020	1	1	2	1	2	2	1	2	1	0	OG0001020	TRINITY_DN5185_c0_g1	TRINITY_DN22930_c3_g2	TRINITY_DN616_c10_g1	TRINITY_DN15362_c5_g1	TRINITY_DN16316_c8_g8	TRINITY_DN24004_c6_g1	TRINITY_DN17559_c0_g1	TRINITY_DN19433_c5_g1	TRINITY_DN42471_c1_g1	OG0001020	1	1	1	1	1	1	1	1	1	1	OG0001020	TRINITY_DN616_c10_g1	TRINITY_DN16316_c8_g8	TRINITY_DN42471_c1_g1	TRINITY_DN24004_c6_g1	TRINITY_DN17559_c0_g1	TRINITY_DN15362_c5_g1	TRINITY_DN19433_c5_g1
OG0001021	TRINITY_DN2809_c0_g1	TRINITY_DN19955_c3_g1, TRINITY_DN19955_c3_g10	TRINITY_DN6188_c0_g1	TRINITY_DN13066_c2_g1, TRINITY_DN13066_c2_g3	TRINITY_DN18156_c5_g1	TRINITY_DN23804_c2_g1	TRINITY_DN23401_c2_g1	TRINITY_DN19894_c9_g1, TRINITY_DN19894_c9_g2, TRINITY_DN19894_c9_g6	TRINITY_DN45453_c2_g2	OG0001021	1	2	1	2	1	1	1	3	1	0	OG0001021	TRINITY_DN2809_c0_g1	TRINITY_DN19955_c3_g1	TRINITY_DN6188_c0_g1	TRINITY_DN13066_c2_g3	TRINITY_DN18156_c5_g1	TRINITY_DN23804_c2_g1	TRINITY_DN23401_c2_g1	TRINITY_DN19894_c9_g1	TRINITY_DN45453_c2_g2	OG0001021	1	1	1	1	1	1	1	1	1	1	OG0001021	TRINITY_DN6188_c0_g1	TRINITY_DN18156_c5_g1	TRINITY_DN45453_c2_g2	TRINITY_DN23804_c2_g1	TRINITY_DN23401_c2_g1	TRINITY_DN13066_c2_g3	TRINITY_DN19894_c9_g1
OG0001022	TRINITY_DN492_c0_g1	TRINITY_DN23685_c1_g1, TRINITY_DN42413_c0_g1	TRINITY_DN621_c1_g2	TRINITY_DN19276_c3_g1, TRINITY_DN19997_c3_g1	TRINITY_DN19735_c1_g2	TRINITY_DN24840_c1_g1	TRINITY_DN24951_c0_g1	TRINITY_DN21088_c1_g1	TRINITY_DN36423_c0_g1, TRINITY_DN45419_c8_g1, TRINITY_DN49036_c5_g1	OG0001022	1	2	1	2	1	1	1	1	3	0	OG0001022	TRINITY_DN492_c0_g1	TRINITY_DN23685_c1_g1	TRINITY_DN621_c1_g2	TRINITY_DN19997_c3_g1	TRINITY_DN19735_c1_g2	TRINITY_DN24840_c1_g1	TRINITY_DN24951_c0_g1	TRINITY_DN21088_c1_g1	TRINITY_DN36423_c0_g1	OG0001022	1	1	1	1	1	1	1	1	1	1	OG0001022	TRINITY_DN621_c1_g2	TRINITY_DN19735_c1_g2	TRINITY_DN36423_c0_g1	TRINITY_DN24840_c1_g1	TRINITY_DN24951_c0_g1	TRINITY_DN19997_c3_g1	TRINITY_DN21088_c1_g1
OG0001023	TRINITY_DN4792_c0_g1	TRINITY_DN22812_c3_g1	TRINITY_DN621_c5_g1	TRINITY_DN16649_c4_g3, TRINITY_DN16649_c4_g4, TRINITY_DN20425_c1_g1	TRINITY_DN19511_c4_g1, TRINITY_DN19511_c4_g5	TRINITY_DN24123_c7_g1	TRINITY_DN23651_c4_g1	TRINITY_DN18547_c6_g1, TRINITY_DN19803_c3_g1	TRINITY_DN45005_c0_g1	OG0001023	1	1	1	3	2	1	1	2	1	0	OG0001023	TRINITY_DN4792_c0_g1	TRINITY_DN22812_c3_g1	TRINITY_DN621_c5_g1	TRINITY_DN16649_c4_g4	TRINITY_DN19511_c4_g1	TRINITY_DN24123_c7_g1	TRINITY_DN23651_c4_g1	TRINITY_DN18547_c6_g1	TRINITY_DN45005_c0_g1	OG0001023	1	1	1	1	1	1	1	1	1	1	OG0001023	TRINITY_DN621_c5_g1	TRINITY_DN19511_c4_g1	TRINITY_DN45005_c0_g1	TRINITY_DN24123_c7_g1	TRINITY_DN23651_c4_g1	TRINITY_DN16649_c4_g4	TRINITY_DN18547_c6_g1
OG0001025	TRINITY_DN456_c0_g2	TRINITY_DN22485_c7_g1, TRINITY_DN23810_c9_g2	TRINITY_DN641_c0_g2	TRINITY_DN14982_c4_g2, TRINITY_DN14982_c4_g4	TRINITY_DN16496_c6_g8	TRINITY_DN23072_c10_g1, TRINITY_DN24625_c5_g3	TRINITY_DN19424_c3_g1	TRINITY_DN19255_c6_g4	TRINITY_DN42734_c0_g2, TRINITY_DN44369_c5_g1	OG0001025	1	2	1	2	1	2	1	1	2	0	OG0001025	TRINITY_DN456_c0_g2	TRINITY_DN22485_c7_g1	TRINITY_DN641_c0_g2	TRINITY_DN14982_c4_g2	TRINITY_DN16496_c6_g8	TRINITY_DN24625_c5_g3	TRINITY_DN19424_c3_g1	TRINITY_DN19255_c6_g4	TRINITY_DN44369_c5_g1	OG0001025	1	1	1	1	1	1	1	1	1	1	OG0001025	TRINITY_DN641_c0_g2	TRINITY_DN16496_c6_g8	TRINITY_DN44369_c5_g1	TRINITY_DN24625_c5_g3	TRINITY_DN19424_c3_g1	TRINITY_DN14982_c4_g2	TRINITY_DN19255_c6_g4
OG0001026	TRINITY_DN405_c2_g3	TRINITY_DN20009_c6_g1	TRINITY_DN6454_c2_g4	TRINITY_DN17082_c8_g1	TRINITY_DN18269_c17_g1	TRINITY_DN22597_c2_g1, TRINITY_DN23388_c10_g15	TRINITY_DN19547_c0_g2, TRINITY_DN23125_c3_g4	TRINITY_DN18032_c9_g2, TRINITY_DN19947_c3_g7	TRINITY_DN41619_c7_g2, TRINITY_DN42552_c2_g1	OG0001026	1	1	1	1	1	2	2	2	2	0	OG0001026	TRINITY_DN405_c2_g3	TRINITY_DN20009_c6_g1	TRINITY_DN6454_c2_g4	TRINITY_DN17082_c8_g1	TRINITY_DN18269_c17_g1	TRINITY_DN23388_c10_g15	TRINITY_DN19547_c0_g2	TRINITY_DN19947_c3_g7	TRINITY_DN41619_c7_g2	OG0001026	1	1	1	1	1	1	1	1	1	1	OG0001026	TRINITY_DN6454_c2_g4	TRINITY_DN18269_c17_g1	TRINITY_DN41619_c7_g2	TRINITY_DN23388_c10_g15	TRINITY_DN19547_c0_g2	TRINITY_DN17082_c8_g1	TRINITY_DN19947_c3_g7
OG0001027	TRINITY_DN12480_c0_g1, TRINITY_DN42834_c0_g1	TRINITY_DN18984_c4_g1	TRINITY_DN662_c2_g1	TRINITY_DN11515_c0_g1, TRINITY_DN11515_c0_g2, TRINITY_DN9408_c0_g1	TRINITY_DN18499_c5_g1	TRINITY_DN24830_c1_g1	TRINITY_DN25272_c2_g1	TRINITY_DN19404_c5_g1	TRINITY_DN44444_c0_g1, TRINITY_DN48690_c0_g1	OG0001027	2	1	1	3	1	1	1	1	2	0	OG0001027	TRINITY_DN12480_c0_g1	TRINITY_DN18984_c4_g1	TRINITY_DN662_c2_g1	TRINITY_DN11515_c0_g2	TRINITY_DN18499_c5_g1	TRINITY_DN24830_c1_g1	TRINITY_DN25272_c2_g1	TRINITY_DN19404_c5_g1	TRINITY_DN48690_c0_g1	OG0001027	1	1	1	1	1	1	1	1	1	1	OG0001027	TRINITY_DN662_c2_g1	TRINITY_DN18499_c5_g1	TRINITY_DN48690_c0_g1	TRINITY_DN24830_c1_g1	TRINITY_DN25272_c2_g1	TRINITY_DN11515_c0_g2	TRINITY_DN19404_c5_g1
OG0001028	TRINITY_DN23680_c0_g1	TRINITY_DN20843_c4_g1	TRINITY_DN666_c0_g1	TRINITY_DN19783_c5_g1	TRINITY_DN15755_c0_g1, TRINITY_DN15755_c0_g2	TRINITY_DN21267_c0_g5, TRINITY_DN21319_c0_g1	TRINITY_DN18607_c0_g1	TRINITY_DN19049_c0_g7, TRINITY_DN19049_c0_g8	TRINITY_DN41569_c0_g1, TRINITY_DN41569_c0_g2	OG0001028	1	1	1	1	2	2	1	2	2	0	OG0001028	TRINITY_DN23680_c0_g1	TRINITY_DN20843_c4_g1	TRINITY_DN666_c0_g1	TRINITY_DN19783_c5_g1	TRINITY_DN15755_c0_g1	TRINITY_DN21267_c0_g5	TRINITY_DN18607_c0_g1	TRINITY_DN19049_c0_g7	TRINITY_DN41569_c0_g1	OG0001028	1	1	1	1	1	1	1	1	1	1	OG0001028	TRINITY_DN666_c0_g1	TRINITY_DN15755_c0_g1	TRINITY_DN41569_c0_g1	TRINITY_DN21267_c0_g5	TRINITY_DN18607_c0_g1	TRINITY_DN19783_c5_g1	TRINITY_DN19049_c0_g7
OG0001029	TRINITY_DN194_c0_g1	TRINITY_DN20095_c0_g1	TRINITY_DN675_c0_g2	TRINITY_DN12247_c4_g2, TRINITY_DN21124_c2_g1	TRINITY_DN16931_c3_g1, TRINITY_DN17771_c2_g1	TRINITY_DN22363_c1_g1, TRINITY_DN23872_c5_g1	TRINITY_DN19262_c4_g2	TRINITY_DN17569_c0_g1	TRINITY_DN47190_c0_g1, TRINITY_DN47190_c0_g3	OG0001029	1	1	1	2	2	2	1	1	2	0	OG0001029	TRINITY_DN194_c0_g1	TRINITY_DN20095_c0_g1	TRINITY_DN675_c0_g2	TRINITY_DN12247_c4_g2	TRINITY_DN16931_c3_g1	TRINITY_DN22363_c1_g1	TRINITY_DN19262_c4_g2	TRINITY_DN17569_c0_g1	TRINITY_DN47190_c0_g1	OG0001029	1	1	1	1	1	1	1	1	1	1	OG0001029	TRINITY_DN675_c0_g2	TRINITY_DN16931_c3_g1	TRINITY_DN47190_c0_g1	TRINITY_DN22363_c1_g1	TRINITY_DN19262_c4_g2	TRINITY_DN12247_c4_g2	TRINITY_DN17569_c0_g1
OG0001030	TRINITY_DN886_c0_g1	TRINITY_DN21074_c3_g1, TRINITY_DN23584_c7_g1	TRINITY_DN706_c0_g1	TRINITY_DN21333_c4_g1	TRINITY_DN17268_c5_g1	TRINITY_DN24509_c2_g1	TRINITY_DN19716_c5_g1, TRINITY_DN23883_c6_g1	TRINITY_DN20766_c5_g1	TRINITY_DN34411_c0_g1, TRINITY_DN35355_c0_g1, TRINITY_DN49020_c7_g1	OG0001030	1	2	1	1	1	1	2	1	3	0	OG0001030	TRINITY_DN886_c0_g1	TRINITY_DN21074_c3_g1	TRINITY_DN706_c0_g1	TRINITY_DN21333_c4_g1	TRINITY_DN17268_c5_g1	TRINITY_DN24509_c2_g1	TRINITY_DN23883_c6_g1	TRINITY_DN20766_c5_g1	TRINITY_DN35355_c0_g1	OG0001030	1	1	1	1	1	1	1	1	1	1	OG0001030	TRINITY_DN706_c0_g1	TRINITY_DN17268_c5_g1	TRINITY_DN35355_c0_g1	TRINITY_DN24509_c2_g1	TRINITY_DN23883_c6_g1	TRINITY_DN21333_c4_g1	TRINITY_DN20766_c5_g1
OG0001031		TRINITY_DN23881_c7_g1, TRINITY_DN30106_c0_g1	TRINITY_DN706_c0_g2	TRINITY_DN17956_c5_g1, TRINITY_DN19364_c5_g1	TRINITY_DN17574_c2_g2	TRINITY_DN24462_c2_g1, TRINITY_DN24462_c2_g5	TRINITY_DN23408_c0_g1	TRINITY_DN18942_c9_g1, TRINITY_DN20727_c5_g2	TRINITY_DN45073_c5_g2, TRINITY_DN45667_c6_g1	OG0001031	0	2	1	2	1	2	1	2	2	0	OG0001031		TRINITY_DN23881_c7_g1	TRINITY_DN706_c0_g2	TRINITY_DN17956_c5_g1	TRINITY_DN17574_c2_g2	TRINITY_DN24462_c2_g1	TRINITY_DN23408_c0_g1	TRINITY_DN20727_c5_g2	TRINITY_DN45073_c5_g2	OG0001031	0	1	1	1	1	1	1	1	1	0	OG0001031	TRINITY_DN706_c0_g2	TRINITY_DN17574_c2_g2	TRINITY_DN45073_c5_g2	TRINITY_DN24462_c2_g1	TRINITY_DN23408_c0_g1	TRINITY_DN17956_c5_g1	TRINITY_DN20727_c5_g2
OG0001032	TRINITY_DN1374_c2_g2	TRINITY_DN23554_c3_g1, TRINITY_DN43367_c0_g1, TRINITY_DN62887_c0_g1	TRINITY_DN720_c1_g2	TRINITY_DN20074_c7_g1	TRINITY_DN19705_c8_g1	TRINITY_DN23921_c1_g1	TRINITY_DN24812_c0_g1	TRINITY_DN21249_c4_g1	TRINITY_DN41092_c9_g1, TRINITY_DN48719_c1_g1, TRINITY_DN48719_c1_g2	OG0001032	1	3	1	1	1	1	1	1	3	0	OG0001032	TRINITY_DN1374_c2_g2	TRINITY_DN23554_c3_g1	TRINITY_DN720_c1_g2	TRINITY_DN20074_c7_g1	TRINITY_DN19705_c8_g1	TRINITY_DN23921_c1_g1	TRINITY_DN24812_c0_g1	TRINITY_DN21249_c4_g1	TRINITY_DN48719_c1_g2	OG0001032	1	1	1	1	1	1	1	1	1	1	OG0001032	TRINITY_DN720_c1_g2	TRINITY_DN19705_c8_g1	TRINITY_DN48719_c1_g2	TRINITY_DN23921_c1_g1	TRINITY_DN24812_c0_g1	TRINITY_DN20074_c7_g1	TRINITY_DN21249_c4_g1
OG0001033	TRINITY_DN4939_c1_g1	TRINITY_DN19577_c5_g2, TRINITY_DN23485_c10_g1	TRINITY_DN7441_c0_g1, TRINITY_DN7441_c4_g1	TRINITY_DN13629_c4_g1	TRINITY_DN14759_c0_g1, TRINITY_DN16546_c8_g5	TRINITY_DN24494_c13_g1	TRINITY_DN21027_c4_g1	TRINITY_DN20048_c2_g3	TRINITY_DN42990_c6_g1, TRINITY_DN86221_c0_g1	OG0001033	1	2	2	1	2	1	1	1	2	0	OG0001033	TRINITY_DN4939_c1_g1	TRINITY_DN19577_c5_g2	TRINITY_DN7441_c4_g1	TRINITY_DN13629_c4_g1	TRINITY_DN16546_c8_g5	TRINITY_DN24494_c13_g1	TRINITY_DN21027_c4_g1	TRINITY_DN20048_c2_g3	TRINITY_DN42990_c6_g1	OG0001033	1	1	1	1	1	1	1	1	1	1	OG0001033	TRINITY_DN7441_c4_g1	TRINITY_DN16546_c8_g5	TRINITY_DN42990_c6_g1	TRINITY_DN24494_c13_g1	TRINITY_DN21027_c4_g1	TRINITY_DN13629_c4_g1	TRINITY_DN20048_c2_g3
OG0001034	TRINITY_DN2084_c2_g1	TRINITY_DN20772_c3_g1, TRINITY_DN20772_c3_g2, TRINITY_DN53836_c0_g1	TRINITY_DN751_c0_g4	TRINITY_DN21238_c7_g1		TRINITY_DN22695_c4_g1	TRINITY_DN21130_c3_g2, TRINITY_DN21130_c3_g7	TRINITY_DN19212_c12_g3, TRINITY_DN20708_c1_g2	TRINITY_DN43049_c2_g2, TRINITY_DN43049_c2_g3	OG0001034	1	3	1	1	0	1	2	2	2	0	OG0001034	TRINITY_DN2084_c2_g1	TRINITY_DN20772_c3_g2	TRINITY_DN751_c0_g4	TRINITY_DN21238_c7_g1		TRINITY_DN22695_c4_g1	TRINITY_DN21130_c3_g2	TRINITY_DN20708_c1_g2	TRINITY_DN43049_c2_g3	OG0001034	1	1	1	1	0	1	1	1	1	0	OG0001034	TRINITY_DN751_c0_g4	TRINITY_UK00000_c0_g1	TRINITY_DN43049_c2_g3	TRINITY_DN22695_c4_g1	TRINITY_DN21130_c3_g2	TRINITY_DN21238_c7_g1	TRINITY_DN20708_c1_g2
OG0001035	TRINITY_DN837_c1_g2	TRINITY_DN21531_c8_g1, TRINITY_DN21918_c0_g1	TRINITY_DN762_c1_g2	TRINITY_DN13201_c6_g1, TRINITY_DN16268_c7_g1	TRINITY_DN19795_c10_g1, TRINITY_DN805_c0_g1	TRINITY_DN22876_c7_g2	TRINITY_DN23528_c2_g1	TRINITY_DN19694_c8_g1, TRINITY_DN20477_c8_g1	TRINITY_DN48249_c1_g1	OG0001035	1	2	1	2	2	1	1	2	1	0	OG0001035	TRINITY_DN837_c1_g2	TRINITY_DN21918_c0_g1	TRINITY_DN762_c1_g2	TRINITY_DN13201_c6_g1	TRINITY_DN19795_c10_g1	TRINITY_DN22876_c7_g2	TRINITY_DN23528_c2_g1	TRINITY_DN19694_c8_g1	TRINITY_DN48249_c1_g1	OG0001035	1	1	1	1	1	1	1	1	1	1	OG0001035	TRINITY_DN762_c1_g2	TRINITY_DN19795_c10_g1	TRINITY_DN48249_c1_g1	TRINITY_DN22876_c7_g2	TRINITY_DN23528_c2_g1	TRINITY_DN13201_c6_g1	TRINITY_DN19694_c8_g1
OG0001036	TRINITY_DN6263_c1_g1	TRINITY_DN22357_c3_g2	TRINITY_DN7631_c0_g1	TRINITY_DN12616_c1_g1, TRINITY_DN16614_c10_g2	TRINITY_DN17657_c8_g5	TRINITY_DN23014_c3_g3	TRINITY_DN20467_c1_g1, TRINITY_DN20467_c1_g2	TRINITY_DN19310_c2_g25, TRINITY_DN20962_c6_g1	TRINITY_DN43769_c6_g2, TRINITY_DN43769_c6_g4	OG0001036	1	1	1	2	1	1	2	2	2	0	OG0001036	TRINITY_DN6263_c1_g1	TRINITY_DN22357_c3_g2	TRINITY_DN7631_c0_g1	TRINITY_DN16614_c10_g2	TRINITY_DN17657_c8_g5	TRINITY_DN23014_c3_g3	TRINITY_DN20467_c1_g2	TRINITY_DN20962_c6_g1	TRINITY_DN43769_c6_g2	OG0001036	1	1	1	1	1	1	1	1	1	1	OG0001036	TRINITY_DN7631_c0_g1	TRINITY_DN17657_c8_g5	TRINITY_DN43769_c6_g2	TRINITY_DN23014_c3_g3	TRINITY_DN20467_c1_g2	TRINITY_DN16614_c10_g2	TRINITY_DN20962_c6_g1
OG0001037	TRINITY_DN4425_c0_g1	TRINITY_DN19813_c7_g1, TRINITY_DN23838_c9_g1, TRINITY_DN23838_c9_g3	TRINITY_DN7648_c0_g3, TRINITY_DN8966_c1_g1	TRINITY_DN12964_c4_g2	TRINITY_DN17434_c2_g2, TRINITY_DN18277_c5_g1	TRINITY_DN23621_c12_g2	TRINITY_DN21965_c5_g1	TRINITY_DN19678_c1_g1	TRINITY_DN42140_c0_g1	OG0001037	1	3	2	1	2	1	1	1	1	0	OG0001037	TRINITY_DN4425_c0_g1	TRINITY_DN19813_c7_g1	TRINITY_DN7648_c0_g3	TRINITY_DN12964_c4_g2	TRINITY_DN17434_c2_g2	TRINITY_DN23621_c12_g2	TRINITY_DN21965_c5_g1	TRINITY_DN19678_c1_g1	TRINITY_DN42140_c0_g1	OG0001037	1	1	1	1	1	1	1	1	1	1	OG0001037	TRINITY_DN7648_c0_g3	TRINITY_DN17434_c2_g2	TRINITY_DN42140_c0_g1	TRINITY_DN23621_c12_g2	TRINITY_DN21965_c5_g1	TRINITY_DN12964_c4_g2	TRINITY_DN19678_c1_g1
OG0001038	TRINITY_DN3947_c0_g1	TRINITY_DN19097_c12_g1	TRINITY_DN7846_c2_g2	TRINITY_DN17965_c6_g3, TRINITY_DN2237_c0_g1	TRINITY_DN17040_c8_g1	TRINITY_DN19177_c0_g1, TRINITY_DN59918_c0_g1	TRINITY_DN18947_c2_g1, TRINITY_DN19349_c14_g1	TRINITY_DN20942_c13_g1	TRINITY_DN36880_c0_g1, TRINITY_DN93034_c0_g1	OG0001038	1	1	1	2	1	2	2	1	2	0	OG0001038	TRINITY_DN3947_c0_g1	TRINITY_DN19097_c12_g1	TRINITY_DN7846_c2_g2	TRINITY_DN17965_c6_g3	TRINITY_DN17040_c8_g1	TRINITY_DN59918_c0_g1	TRINITY_DN19349_c14_g1	TRINITY_DN20942_c13_g1	TRINITY_DN36880_c0_g1	OG0001038	1	1	1	1	1	1	1	1	1	1	OG0001038	TRINITY_DN7846_c2_g2	TRINITY_DN17040_c8_g1	TRINITY_DN36880_c0_g1	TRINITY_DN59918_c0_g1	TRINITY_DN19349_c14_g1	TRINITY_DN17965_c6_g3	TRINITY_DN20942_c13_g1
OG0001039	TRINITY_DN1637_c0_g1, TRINITY_DN973_c12_g2	TRINITY_DN22294_c4_g1	TRINITY_DN7903_c0_g2	TRINITY_DN16461_c5_g1, TRINITY_DN18891_c10_g2	TRINITY_DN19011_c2_g1	TRINITY_DN21326_c0_g1, TRINITY_DN22519_c12_g1	TRINITY_DN21089_c1_g1, TRINITY_DN21089_c1_g2	TRINITY_DN18263_c7_g2	TRINITY_DN47845_c5_g1	OG0001039	2	1	1	2	1	2	2	1	1	0	OG0001039	TRINITY_DN973_c12_g2	TRINITY_DN22294_c4_g1	TRINITY_DN7903_c0_g2	TRINITY_DN16461_c5_g1	TRINITY_DN19011_c2_g1	TRINITY_DN21326_c0_g1	TRINITY_DN21089_c1_g1	TRINITY_DN18263_c7_g2	TRINITY_DN47845_c5_g1	OG0001039	1	1	1	1	1	1	1	1	1	1	OG0001039	TRINITY_DN7903_c0_g2	TRINITY_DN19011_c2_g1	TRINITY_DN47845_c5_g1	TRINITY_DN21326_c0_g1	TRINITY_DN21089_c1_g1	TRINITY_DN16461_c5_g1	TRINITY_DN18263_c7_g2
OG0001040	TRINITY_DN2448_c0_g2	TRINITY_DN23907_c4_g1	TRINITY_DN794_c2_g1, TRINITY_DN8211_c7_g1	TRINITY_DN16544_c0_g1, TRINITY_DN16871_c6_g1	TRINITY_DN15620_c0_g1, TRINITY_DN17455_c6_g1		TRINITY_DN19249_c4_g2, TRINITY_DN20359_c5_g1	TRINITY_DN16074_c0_g1, TRINITY_DN21380_c4_g3	TRINITY_DN40820_c0_g1	OG0001040	1	1	2	2	2	0	2	2	1	0	OG0001040	TRINITY_DN2448_c0_g2	TRINITY_DN23907_c4_g1	TRINITY_DN794_c2_g1	TRINITY_DN16871_c6_g1	TRINITY_DN17455_c6_g1		TRINITY_DN20359_c5_g1	TRINITY_DN21380_c4_g3	TRINITY_DN40820_c0_g1	OG0001040	1	1	1	1	1	0	1	1	1	0	OG0001040	TRINITY_DN794_c2_g1	TRINITY_DN17455_c6_g1	TRINITY_DN40820_c0_g1	TRINITY_UK00000_c0_g1	TRINITY_DN20359_c5_g1	TRINITY_DN16871_c6_g1	TRINITY_DN21380_c4_g3
OG0001041	TRINITY_DN2242_c2_g2	TRINITY_DN21932_c8_g1	TRINITY_DN8171_c2_g2	TRINITY_DN15748_c2_g1, TRINITY_DN20642_c4_g1	TRINITY_DN16905_c5_g5, TRINITY_DN17495_c4_g3	TRINITY_DN24230_c3_g2	TRINITY_DN20590_c6_g1	TRINITY_DN18632_c3_g5, TRINITY_DN21148_c2_g1	TRINITY_DN44571_c2_g1, TRINITY_DN45706_c4_g1	OG0001041	1	1	1	2	2	1	1	2	2	0	OG0001041	TRINITY_DN2242_c2_g2	TRINITY_DN21932_c8_g1	TRINITY_DN8171_c2_g2	TRINITY_DN15748_c2_g1	TRINITY_DN17495_c4_g3	TRINITY_DN24230_c3_g2	TRINITY_DN20590_c6_g1	TRINITY_DN18632_c3_g5	TRINITY_DN44571_c2_g1	OG0001041	1	1	1	1	1	1	1	1	1	1	OG0001041	TRINITY_DN8171_c2_g2	TRINITY_DN17495_c4_g3	TRINITY_DN44571_c2_g1	TRINITY_DN24230_c3_g2	TRINITY_DN20590_c6_g1	TRINITY_DN15748_c2_g1	TRINITY_DN18632_c3_g5
OG0001042	TRINITY_DN973_c2_g1	TRINITY_DN22239_c5_g2, TRINITY_DN35899_c0_g1	TRINITY_DN822_c0_g3, TRINITY_DN822_c4_g2	TRINITY_DN12796_c0_g1	TRINITY_DN18311_c1_g2, TRINITY_DN43224_c0_g1	TRINITY_DN22343_c3_g1	TRINITY_DN21169_c14_g1	TRINITY_DN19911_c0_g1, TRINITY_DN19911_c0_g6	TRINITY_DN47102_c7_g1	OG0001042	1	2	2	1	2	1	1	2	1	0	OG0001042	TRINITY_DN973_c2_g1	TRINITY_DN22239_c5_g2	TRINITY_DN822_c0_g3	TRINITY_DN12796_c0_g1	TRINITY_DN18311_c1_g2	TRINITY_DN22343_c3_g1	TRINITY_DN21169_c14_g1	TRINITY_DN19911_c0_g6	TRINITY_DN47102_c7_g1	OG0001042	1	1	1	1	1	1	1	1	1	1	OG0001042	TRINITY_DN822_c0_g3	TRINITY_DN18311_c1_g2	TRINITY_DN47102_c7_g1	TRINITY_DN22343_c3_g1	TRINITY_DN21169_c14_g1	TRINITY_DN12796_c0_g1	TRINITY_DN19911_c0_g6
OG0001043	TRINITY_DN25662_c7_g1, TRINITY_DN2862_c1_g1	TRINITY_DN20697_c12_g1, TRINITY_DN28338_c0_g1, TRINITY_DN51952_c0_g1	TRINITY_DN8309_c1_g1	TRINITY_DN16891_c2_g2	TRINITY_DN16157_c6_g1, TRINITY_DN46422_c0_g1	TRINITY_DN6072_c0_g1	TRINITY_DN15916_c0_g1	TRINITY_DN15892_c0_g1	TRINITY_DN39582_c0_g1	OG0001043	2	3	1	1	2	1	1	1	1	0	OG0001043	TRINITY_DN2862_c1_g1	TRINITY_DN51952_c0_g1	TRINITY_DN8309_c1_g1	TRINITY_DN16891_c2_g2	TRINITY_DN16157_c6_g1	TRINITY_DN6072_c0_g1	TRINITY_DN15916_c0_g1	TRINITY_DN15892_c0_g1	TRINITY_DN39582_c0_g1	OG0001043	1	1	1	1	1	1	1	1	1	1	OG0001043	TRINITY_DN8309_c1_g1	TRINITY_DN16157_c6_g1	TRINITY_DN39582_c0_g1	TRINITY_DN6072_c0_g1	TRINITY_DN15916_c0_g1	TRINITY_DN16891_c2_g2	TRINITY_DN15892_c0_g1
OG0001044	TRINITY_DN8674_c2_g2	TRINITY_DN22745_c3_g1	TRINITY_DN832_c2_g1	TRINITY_DN14443_c2_g1, TRINITY_DN21430_c1_g1	TRINITY_DN18679_c6_g1, TRINITY_DN18679_c6_g7	TRINITY_DN23632_c1_g2	TRINITY_DN24558_c0_g2	TRINITY_DN18887_c3_g1, TRINITY_DN20823_c4_g5	TRINITY_DN44126_c5_g4, TRINITY_DN46668_c2_g3	OG0001044	1	1	1	2	2	1	1	2	2	0	OG0001044	TRINITY_DN8674_c2_g2	TRINITY_DN22745_c3_g1	TRINITY_DN832_c2_g1	TRINITY_DN21430_c1_g1	TRINITY_DN18679_c6_g1	TRINITY_DN23632_c1_g2	TRINITY_DN24558_c0_g2	TRINITY_DN20823_c4_g5	TRINITY_DN46668_c2_g3	OG0001044	1	1	1	1	1	1	1	1	1	1	OG0001044	TRINITY_DN832_c2_g1	TRINITY_DN18679_c6_g1	TRINITY_DN46668_c2_g3	TRINITY_DN23632_c1_g2	TRINITY_DN24558_c0_g2	TRINITY_DN21430_c1_g1	TRINITY_DN20823_c4_g5
OG0001045	TRINITY_DN6763_c1_g2	TRINITY_DN21941_c10_g1, TRINITY_DN21941_c10_g4	TRINITY_DN8460_c18_g1	TRINITY_DN17753_c5_g1	TRINITY_DN16159_c8_g1	TRINITY_DN4116_c0_g1, TRINITY_DN4116_c0_g2, TRINITY_DN52963_c0_g1	TRINITY_DN18641_c13_g1	TRINITY_DN18204_c4_g1	TRINITY_DN24404_c0_g1, TRINITY_DN27500_c0_g1	OG0001045	1	2	1	1	1	3	1	1	2	0	OG0001045	TRINITY_DN6763_c1_g2	TRINITY_DN21941_c10_g1	TRINITY_DN8460_c18_g1	TRINITY_DN17753_c5_g1	TRINITY_DN16159_c8_g1	TRINITY_DN4116_c0_g1	TRINITY_DN18641_c13_g1	TRINITY_DN18204_c4_g1	TRINITY_DN27500_c0_g1	OG0001045	1	1	1	1	1	1	1	1	1	1	OG0001045	TRINITY_DN8460_c18_g1	TRINITY_DN16159_c8_g1	TRINITY_DN27500_c0_g1	TRINITY_DN4116_c0_g1	TRINITY_DN18641_c13_g1	TRINITY_DN17753_c5_g1	TRINITY_DN18204_c4_g1
OG0001046	TRINITY_DN152_c4_g2	TRINITY_DN23815_c6_g1	TRINITY_DN851_c3_g3	TRINITY_DN17789_c0_g1	TRINITY_DN16663_c9_g1	TRINITY_DN24567_c1_g2, TRINITY_DN24567_c1_g4	TRINITY_DN19387_c2_g2, TRINITY_DN24693_c4_g5	TRINITY_DN19932_c9_g1, TRINITY_DN19932_c9_g2	TRINITY_DN15687_c0_g1, TRINITY_DN40662_c1_g1	OG0001046	1	1	1	1	1	2	2	2	2	0	OG0001046	TRINITY_DN152_c4_g2	TRINITY_DN23815_c6_g1	TRINITY_DN851_c3_g3	TRINITY_DN17789_c0_g1	TRINITY_DN16663_c9_g1	TRINITY_DN24567_c1_g2	TRINITY_DN19387_c2_g2	TRINITY_DN19932_c9_g1	TRINITY_DN40662_c1_g1	OG0001046	1	1	1	1	1	1	1	1	1	1	OG0001046	TRINITY_DN851_c3_g3	TRINITY_DN16663_c9_g1	TRINITY_DN40662_c1_g1	TRINITY_DN24567_c1_g2	TRINITY_DN19387_c2_g2	TRINITY_DN17789_c0_g1	TRINITY_DN19932_c9_g1
OG0001047	TRINITY_DN8176_c0_g1, TRINITY_DN95_c0_g1	TRINITY_DN15501_c0_g1, TRINITY_DN15501_c0_g2, TRINITY_DN23442_c2_g1	TRINITY_DN8690_c0_g1	TRINITY_DN16076_c3_g1	TRINITY_DN18617_c1_g1	TRINITY_DN23304_c7_g3	TRINITY_DN23409_c1_g1	TRINITY_DN17829_c6_g1, TRINITY_DN4841_c0_g1	TRINITY_DN48120_c1_g1	OG0001047	2	3	1	1	1	1	1	2	1	0	OG0001047	TRINITY_DN95_c0_g1	TRINITY_DN23442_c2_g1	TRINITY_DN8690_c0_g1	TRINITY_DN16076_c3_g1	TRINITY_DN18617_c1_g1	TRINITY_DN23304_c7_g3	TRINITY_DN23409_c1_g1	TRINITY_DN17829_c6_g1	TRINITY_DN48120_c1_g1	OG0001047	1	1	1	1	1	1	1	1	1	1	OG0001047	TRINITY_DN8690_c0_g1	TRINITY_DN18617_c1_g1	TRINITY_DN48120_c1_g1	TRINITY_DN23304_c7_g3	TRINITY_DN23409_c1_g1	TRINITY_DN16076_c3_g1	TRINITY_DN17829_c6_g1
OG0001048	TRINITY_DN1748_c0_g1	TRINITY_DN18871_c1_g1, TRINITY_DN18871_c1_g2	TRINITY_DN8776_c0_g1	TRINITY_DN16381_c9_g1	TRINITY_DN14511_c0_g1, TRINITY_DN37931_c0_g1	TRINITY_DN22637_c2_g1	TRINITY_DN20049_c4_g2, TRINITY_DN21046_c2_g1	TRINITY_DN20308_c4_g1	TRINITY_DN45877_c0_g1, TRINITY_DN46597_c6_g1	OG0001048	1	2	1	1	2	1	2	1	2	0	OG0001048	TRINITY_DN1748_c0_g1	TRINITY_DN18871_c1_g1	TRINITY_DN8776_c0_g1	TRINITY_DN16381_c9_g1	TRINITY_DN37931_c0_g1	TRINITY_DN22637_c2_g1	TRINITY_DN21046_c2_g1	TRINITY_DN20308_c4_g1	TRINITY_DN45877_c0_g1	OG0001048	1	1	1	1	1	1	1	1	1	1	OG0001048	TRINITY_DN8776_c0_g1	TRINITY_DN37931_c0_g1	TRINITY_DN45877_c0_g1	TRINITY_DN22637_c2_g1	TRINITY_DN21046_c2_g1	TRINITY_DN16381_c9_g1	TRINITY_DN20308_c4_g1
OG0001049	TRINITY_DN1025_c0_g2	TRINITY_DN13331_c0_g1, TRINITY_DN21081_c6_g1, TRINITY_DN36573_c0_g1	TRINITY_DN8892_c0_g1	TRINITY_DN14534_c2_g2, TRINITY_DN14534_c2_g3	TRINITY_DN12908_c0_g1	TRINITY_DN24279_c3_g1	TRINITY_DN22613_c6_g1	TRINITY_DN17943_c5_g1, TRINITY_DN17943_c5_g2	TRINITY_DN46278_c4_g1	OG0001049	1	3	1	2	1	1	1	2	1	0	OG0001049	TRINITY_DN1025_c0_g2	TRINITY_DN21081_c6_g1	TRINITY_DN8892_c0_g1	TRINITY_DN14534_c2_g2	TRINITY_DN12908_c0_g1	TRINITY_DN24279_c3_g1	TRINITY_DN22613_c6_g1	TRINITY_DN17943_c5_g1	TRINITY_DN46278_c4_g1	OG0001049	1	1	1	1	1	1	1	1	1	1	OG0001049	TRINITY_DN8892_c0_g1	TRINITY_DN12908_c0_g1	TRINITY_DN46278_c4_g1	TRINITY_DN24279_c3_g1	TRINITY_DN22613_c6_g1	TRINITY_DN14534_c2_g2	TRINITY_DN17943_c5_g1
OG0001050	TRINITY_DN1184_c2_g1	TRINITY_DN20979_c2_g1	TRINITY_DN889_c4_g1	TRINITY_DN17860_c3_g1, TRINITY_DN19650_c4_g1	TRINITY_DN16966_c5_g1	TRINITY_DN24088_c4_g1, TRINITY_DN24088_c4_g3	TRINITY_DN18490_c13_g1	TRINITY_DN20702_c2_g2, TRINITY_DN20702_c2_g5	TRINITY_DN46951_c1_g1, TRINITY_DN47849_c4_g1	OG0001050	1	1	1	2	1	2	1	2	2	0	OG0001050	TRINITY_DN1184_c2_g1	TRINITY_DN20979_c2_g1	TRINITY_DN889_c4_g1	TRINITY_DN19650_c4_g1	TRINITY_DN16966_c5_g1	TRINITY_DN24088_c4_g3	TRINITY_DN18490_c13_g1	TRINITY_DN20702_c2_g2	TRINITY_DN47849_c4_g1	OG0001050	1	1	1	1	1	1	1	1	1	1	OG0001050	TRINITY_DN889_c4_g1	TRINITY_DN16966_c5_g1	TRINITY_DN47849_c4_g1	TRINITY_DN24088_c4_g3	TRINITY_DN18490_c13_g1	TRINITY_DN19650_c4_g1	TRINITY_DN20702_c2_g2
OG0001051		TRINITY_DN19627_c3_g1	TRINITY_DN9063_c2_g1, TRINITY_DN9063_c3_g1	TRINITY_DN14025_c7_g1, TRINITY_DN14025_c7_g2	TRINITY_DN19654_c9_g1	TRINITY_DN22187_c2_g1	TRINITY_DN33283_c0_g1, TRINITY_DN47722_c0_g1	TRINITY_DN21154_c3_g1	TRINITY_DN14686_c0_g1, TRINITY_DN59616_c0_g1, TRINITY_DN73868_c0_g1	OG0001051	0	1	2	2	1	1	2	1	3	0	OG0001051		TRINITY_DN19627_c3_g1	TRINITY_DN9063_c3_g1	TRINITY_DN14025_c7_g1	TRINITY_DN19654_c9_g1	TRINITY_DN22187_c2_g1	TRINITY_DN47722_c0_g1	TRINITY_DN21154_c3_g1	TRINITY_DN73868_c0_g1	OG0001051	0	1	1	1	1	1	1	1	1	0	OG0001051	TRINITY_DN9063_c3_g1	TRINITY_DN19654_c9_g1	TRINITY_DN73868_c0_g1	TRINITY_DN22187_c2_g1	TRINITY_DN47722_c0_g1	TRINITY_DN14025_c7_g1	TRINITY_DN21154_c3_g1
OG0001052	TRINITY_DN2633_c0_g1	TRINITY_DN19611_c3_g1	TRINITY_DN9325_c0_g2, TRINITY_DN9325_c4_g1	TRINITY_DN15928_c11_g1	TRINITY_DN19269_c3_g2, TRINITY_DN41191_c0_g1	TRINITY_DN23069_c3_g1, TRINITY_DN23069_c3_g5	TRINITY_DN19847_c5_g2, TRINITY_DN20053_c0_g2, TRINITY_DN20053_c0_g3		TRINITY_DN41396_c0_g1	OG0001052	1	1	2	1	2	2	3	0	1	0	OG0001052	TRINITY_DN2633_c0_g1	TRINITY_DN19611_c3_g1	TRINITY_DN9325_c0_g2	TRINITY_DN15928_c11_g1	TRINITY_DN19269_c3_g2	TRINITY_DN23069_c3_g5	TRINITY_DN19847_c5_g2		TRINITY_DN41396_c0_g1	OG0001052	1	1	1	1	1	1	1	0	1	0	OG0001052	TRINITY_DN9325_c0_g2	TRINITY_DN19269_c3_g2	TRINITY_DN41396_c0_g1	TRINITY_DN23069_c3_g5	TRINITY_DN19847_c5_g2	TRINITY_DN15928_c11_g1	TRINITY_UK00000_c0_g1
OG0001054	TRINITY_DN237_c0_g2	TRINITY_DN22410_c5_g1	TRINITY_DN95_c0_g3	TRINITY_DN12393_c2_g3, TRINITY_DN13331_c10_g1	TRINITY_DN19476_c2_g1	TRINITY_DN23635_c11_g1, TRINITY_DN24852_c6_g3	TRINITY_DN23097_c4_g1, TRINITY_DN23554_c4_g2	TRINITY_DN20996_c5_g1	TRINITY_DN47549_c4_g2, TRINITY_DN47884_c4_g1	OG0001054	1	1	1	2	1	2	2	1	2	0	OG0001054	TRINITY_DN237_c0_g2	TRINITY_DN22410_c5_g1	TRINITY_DN95_c0_g3	TRINITY_DN12393_c2_g3	TRINITY_DN19476_c2_g1	TRINITY_DN23635_c11_g1	TRINITY_DN23554_c4_g2	TRINITY_DN20996_c5_g1	TRINITY_DN47549_c4_g2	OG0001054	1	1	1	1	1	1	1	1	1	1	OG0001054	TRINITY_DN95_c0_g3	TRINITY_DN19476_c2_g1	TRINITY_DN47549_c4_g2	TRINITY_DN23635_c11_g1	TRINITY_DN23554_c4_g2	TRINITY_DN12393_c2_g3	TRINITY_DN20996_c5_g1
OG0001055	TRINITY_DN3573_c1_g1	TRINITY_DN23166_c4_g3, TRINITY_DN29982_c0_g1	TRINITY_DN9739_c0_g2		TRINITY_DN15774_c0_g1, TRINITY_DN38631_c0_g1, TRINITY_DN9640_c0_g1	TRINITY_DN20011_c0_g2	TRINITY_DN20449_c6_g2, TRINITY_DN20449_c6_g4	TRINITY_DN15853_c0_g2	TRINITY_DN21568_c0_g1, TRINITY_DN39085_c0_g1	OG0001055	1	2	1	0	3	1	2	1	2	0	OG0001055	TRINITY_DN3573_c1_g1	TRINITY_DN23166_c4_g3	TRINITY_DN9739_c0_g2		TRINITY_DN15774_c0_g1	TRINITY_DN20011_c0_g2	TRINITY_DN20449_c6_g2	TRINITY_DN15853_c0_g2	TRINITY_DN21568_c0_g1	OG0001055	1	1	1	0	1	1	1	1	1	0	OG0001055	TRINITY_DN9739_c0_g2	TRINITY_DN15774_c0_g1	TRINITY_DN21568_c0_g1	TRINITY_DN20011_c0_g2	TRINITY_DN20449_c6_g2	TRINITY_UK00000_c0_g1	TRINITY_DN15853_c0_g2
OG0001056	TRINITY_DN601_c0_g3	TRINITY_DN31860_c0_g1	TRINITY_DN9846_c1_g1, TRINITY_DN9846_c3_g1	TRINITY_DN16393_c0_g1	TRINITY_DN17490_c6_g5, TRINITY_DN30834_c0_g1	TRINITY_DN17843_c0_g1	TRINITY_DN22733_c7_g1	TRINITY_DN21265_c2_g1	TRINITY_DN25453_c0_g1, TRINITY_DN27354_c0_g1, TRINITY_DN4562_c0_g1	OG0001056	1	1	2	1	2	1	1	1	3	0	OG0001056	TRINITY_DN601_c0_g3	TRINITY_DN31860_c0_g1	TRINITY_DN9846_c1_g1	TRINITY_DN16393_c0_g1	TRINITY_DN17490_c6_g5	TRINITY_DN17843_c0_g1	TRINITY_DN22733_c7_g1	TRINITY_DN21265_c2_g1	TRINITY_DN27354_c0_g1	OG0001056	1	1	1	1	1	1	1	1	1	1	OG0001056	TRINITY_DN9846_c1_g1	TRINITY_DN17490_c6_g5	TRINITY_DN27354_c0_g1	TRINITY_DN17843_c0_g1	TRINITY_DN22733_c7_g1	TRINITY_DN16393_c0_g1	TRINITY_DN21265_c2_g1
OG0001057	TRINITY_DN50942_c0_g1			TRINITY_DN32141_c0_g1	TRINITY_DN10314_c0_g1, TRINITY_DN11945_c0_g2	TRINITY_DN12648_c0_g1, TRINITY_DN32317_c0_g1, TRINITY_DN52153_c0_g1	TRINITY_DN15224_c0_g1, TRINITY_DN33819_c0_g1	TRINITY_DN44224_c0_g1	TRINITY_DN3453_c0_g1, TRINITY_DN57932_c0_g1, TRINITY_DN82502_c0_g1	OG0001057	1	0	0	1	2	3	2	1	3	0	OG0001057	TRINITY_DN50942_c0_g1			TRINITY_DN32141_c0_g1	TRINITY_DN11945_c0_g2	TRINITY_DN32317_c0_g1	TRINITY_DN33819_c0_g1	TRINITY_DN44224_c0_g1	TRINITY_DN57932_c0_g1	OG0001057	1	0	0	1	1	1	1	1	1	0	OG0001057	TRINITY_UK00000_c0_g1	TRINITY_DN11945_c0_g2	TRINITY_DN57932_c0_g1	TRINITY_DN32317_c0_g1	TRINITY_DN33819_c0_g1	TRINITY_DN32141_c0_g1	TRINITY_DN44224_c0_g1
OG0001059	TRINITY_DN29688_c0_g3, TRINITY_DN4681_c2_g2	TRINITY_DN19580_c5_g1, TRINITY_DN21679_c3_g2		TRINITY_DN20199_c4_g1	TRINITY_DN13372_c0_g1		TRINITY_DN22884_c7_g1, TRINITY_DN22884_c7_g2	TRINITY_DN21020_c1_g4, TRINITY_DN21020_c1_g9	TRINITY_DN23440_c0_g1, TRINITY_DN23440_c1_g1, TRINITY_DN35487_c0_g2	OG0001059	2	2	0	1	1	0	2	2	3	0	OG0001059	TRINITY_DN4681_c2_g2	TRINITY_DN19580_c5_g1		TRINITY_DN20199_c4_g1	TRINITY_DN13372_c0_g1		TRINITY_DN22884_c7_g1	TRINITY_DN21020_c1_g9	TRINITY_DN23440_c1_g1	OG0001059	1	1	0	1	1	0	1	1	1	0	OG0001059	TRINITY_UK00000_c0_g1	TRINITY_DN13372_c0_g1	TRINITY_DN23440_c1_g1	TRINITY_UK00000_c0_g1	TRINITY_DN22884_c7_g1	TRINITY_DN20199_c4_g1	TRINITY_DN21020_c1_g9
OG0001060	TRINITY_DN4662_c1_g1, TRINITY_DN6129_c0_g2	TRINITY_DN19557_c4_g2, TRINITY_DN23891_c6_g1		TRINITY_DN15289_c2_g2, TRINITY_DN17777_c11_g1, TRINITY_DN17777_c11_g3	TRINITY_DN16488_c2_g1, TRINITY_DN16488_c4_g1	TRINITY_DN22609_c1_g1	TRINITY_DN24369_c0_g1	TRINITY_DN18642_c5_g2	TRINITY_DN42070_c0_g1	OG0001060	2	2	0	3	2	1	1	1	1	0	OG0001060	TRINITY_DN6129_c0_g2	TRINITY_DN23891_c6_g1		TRINITY_DN17777_c11_g3	TRINITY_DN16488_c4_g1	TRINITY_DN22609_c1_g1	TRINITY_DN24369_c0_g1	TRINITY_DN18642_c5_g2	TRINITY_DN42070_c0_g1	OG0001060	1	1	0	1	1	1	1	1	1	0	OG0001060	TRINITY_UK00000_c0_g1	TRINITY_DN16488_c4_g1	TRINITY_DN42070_c0_g1	TRINITY_DN22609_c1_g1	TRINITY_DN24369_c0_g1	TRINITY_DN17777_c11_g3	TRINITY_DN18642_c5_g2
OG0001063	TRINITY_DN131_c0_g2	TRINITY_DN22674_c4_g1		TRINITY_DN15561_c3_g1, TRINITY_DN19048_c9_g2, TRINITY_DN20880_c6_g1	TRINITY_DN16834_c5_g1, TRINITY_DN17742_c2_g3	TRINITY_DN24633_c11_g1	TRINITY_DN24107_c3_g2, TRINITY_DN24654_c7_g2	TRINITY_DN21188_c3_g2	TRINITY_DN46554_c1_g1, TRINITY_DN49022_c3_g3	OG0001063	1	1	0	3	2	1	2	1	2	0	OG0001063	TRINITY_DN131_c0_g2	TRINITY_DN22674_c4_g1		TRINITY_DN19048_c9_g2	TRINITY_DN17742_c2_g3	TRINITY_DN24633_c11_g1	TRINITY_DN24654_c7_g2	TRINITY_DN21188_c3_g2	TRINITY_DN49022_c3_g3	OG0001063	1	1	0	1	1	1	1	1	1	0	OG0001063	TRINITY_UK00000_c0_g1	TRINITY_DN17742_c2_g3	TRINITY_DN49022_c3_g3	TRINITY_DN24633_c11_g1	TRINITY_DN24654_c7_g2	TRINITY_DN19048_c9_g2	TRINITY_DN21188_c3_g2
OG0001064	TRINITY_DN2513_c1_g3	TRINITY_DN22370_c4_g8		TRINITY_DN18451_c7_g1	TRINITY_DN16962_c1_g3	TRINITY_DN22502_c11_g1	TRINITY_DN14801_c0_g1, TRINITY_DN18867_c7_g1	TRINITY_DN21012_c0_g1, TRINITY_DN40213_c0_g1, TRINITY_DN45107_c0_g1	TRINITY_DN33392_c1_g1, TRINITY_DN42716_c12_g1, TRINITY_DN80861_c0_g1	OG0001064	1	1	0	1	1	1	2	3	3	0	OG0001064	TRINITY_DN2513_c1_g3	TRINITY_DN22370_c4_g8		TRINITY_DN18451_c7_g1	TRINITY_DN16962_c1_g3	TRINITY_DN22502_c11_g1	TRINITY_DN14801_c0_g1	TRINITY_DN21012_c0_g1	TRINITY_DN42716_c12_g1	OG0001064	1	1	0	1	1	1	1	1	1	0	OG0001064	TRINITY_UK00000_c0_g1	TRINITY_DN16962_c1_g3	TRINITY_DN42716_c12_g1	TRINITY_DN22502_c11_g1	TRINITY_DN14801_c0_g1	TRINITY_DN18451_c7_g1	TRINITY_DN21012_c0_g1
OG0001067		TRINITY_DN17422_c0_g2, TRINITY_DN59952_c0_g1		TRINITY_DN18631_c3_g3	TRINITY_DN17486_c6_g1, TRINITY_DN23440_c0_g1	TRINITY_DN58891_c0_g1, TRINITY_DN59056_c0_g1	TRINITY_DN15413_c0_g1, TRINITY_DN24065_c12_g1	TRINITY_DN40888_c0_g1, TRINITY_DN9750_c0_g1	TRINITY_DN39507_c0_g1, TRINITY_DN45808_c0_g1	OG0001067	0	2	0	1	2	2	2	2	2	0	OG0001067		TRINITY_DN17422_c0_g2		TRINITY_DN18631_c3_g3	TRINITY_DN23440_c0_g1	TRINITY_DN59056_c0_g1	TRINITY_DN15413_c0_g1	TRINITY_DN9750_c0_g1	TRINITY_DN39507_c0_g1	OG0001067	0	1	0	1	1	1	1	1	1	0	OG0001067	TRINITY_UK00000_c0_g1	TRINITY_DN23440_c0_g1	TRINITY_DN39507_c0_g1	TRINITY_DN59056_c0_g1	TRINITY_DN15413_c0_g1	TRINITY_DN18631_c3_g3	TRINITY_DN9750_c0_g1
OG0001071	TRINITY_DN1564_c1_g3	TRINITY_DN20742_c8_g2, TRINITY_DN20742_c8_g5, TRINITY_DN42345_c0_g1		TRINITY_DN15345_c1_g1	TRINITY_DN18731_c7_g2	TRINITY_DN24759_c8_g1	TRINITY_DN23707_c2_g1	TRINITY_DN21231_c4_g2, TRINITY_DN21231_c4_g3	TRINITY_DN36509_c0_g1, TRINITY_DN39051_c0_g1, TRINITY_DN39051_c0_g2	OG0001071	1	3	0	1	1	1	1	2	3	0	OG0001071	TRINITY_DN1564_c1_g3	TRINITY_DN20742_c8_g2		TRINITY_DN15345_c1_g1	TRINITY_DN18731_c7_g2	TRINITY_DN24759_c8_g1	TRINITY_DN23707_c2_g1	TRINITY_DN21231_c4_g3	TRINITY_DN36509_c0_g1	OG0001071	1	1	0	1	1	1	1	1	1	0	OG0001071	TRINITY_UK00000_c0_g1	TRINITY_DN18731_c7_g2	TRINITY_DN36509_c0_g1	TRINITY_DN24759_c8_g1	TRINITY_DN23707_c2_g1	TRINITY_DN15345_c1_g1	TRINITY_DN21231_c4_g3
OG0001074		TRINITY_DN27048_c0_g1, TRINITY_DN53832_c0_g1		TRINITY_DN25115_c0_g1, TRINITY_DN25307_c0_g1	TRINITY_DN19666_c3_g1	TRINITY_DN33581_c0_g1, TRINITY_DN55153_c0_g1	TRINITY_DN12842_c0_g3, TRINITY_DN29024_c0_g1	TRINITY_DN18620_c0_g1, TRINITY_DN20252_c0_g2, TRINITY_DN28846_c0_g1	TRINITY_DN43600_c3_g1	OG0001074	0	2	0	2	1	2	2	3	1	0	OG0001074		TRINITY_DN27048_c0_g1		TRINITY_DN25115_c0_g1	TRINITY_DN19666_c3_g1	TRINITY_DN55153_c0_g1	TRINITY_DN29024_c0_g1	TRINITY_DN28846_c0_g1	TRINITY_DN43600_c3_g1	OG0001074	0	1	0	1	1	1	1	1	1	0	OG0001074	TRINITY_UK00000_c0_g1	TRINITY_DN19666_c3_g1	TRINITY_DN43600_c3_g1	TRINITY_DN55153_c0_g1	TRINITY_DN29024_c0_g1	TRINITY_DN25115_c0_g1	TRINITY_DN28846_c0_g1
OG0001076	TRINITY_DN31510_c2_g1	TRINITY_DN17395_c0_g1, TRINITY_DN8050_c0_g1		TRINITY_DN10823_c0_g1, TRINITY_DN2610_c0_g1	TRINITY_DN21694_c0_g1	TRINITY_DN18453_c0_g1, TRINITY_DN18453_c0_g2	TRINITY_DN40780_c0_g1	TRINITY_DN32219_c0_g1	TRINITY_DN24512_c0_g1, TRINITY_DN39074_c1_g1, TRINITY_DN5951_c0_g1	OG0001076	1	2	0	2	1	2	1	1	3	0	OG0001076	TRINITY_DN31510_c2_g1	TRINITY_DN8050_c0_g1		TRINITY_DN10823_c0_g1	TRINITY_DN21694_c0_g1	TRINITY_DN18453_c0_g2	TRINITY_DN40780_c0_g1	TRINITY_DN32219_c0_g1	TRINITY_DN24512_c0_g1	OG0001076	1	1	0	1	1	1	1	1	1	0	OG0001076	TRINITY_UK00000_c0_g1	TRINITY_DN21694_c0_g1	TRINITY_DN24512_c0_g1	TRINITY_DN18453_c0_g2	TRINITY_DN40780_c0_g1	TRINITY_DN10823_c0_g1	TRINITY_DN32219_c0_g1
OG0001077	TRINITY_DN1015_c1_g2	TRINITY_DN1135_c0_g1, TRINITY_DN14634_c0_g1, TRINITY_DN18154_c0_g2		TRINITY_DN13495_c5_g2	TRINITY_DN22815_c0_g1	TRINITY_DN22732_c0_g1	TRINITY_DN8070_c0_g1	TRINITY_DN34954_c0_g1, TRINITY_DN37183_c0_g1	TRINITY_DN30221_c0_g1, TRINITY_DN30221_c0_g2, TRINITY_DN43186_c0_g4	OG0001077	1	3	0	1	1	1	1	2	3	0	OG0001077	TRINITY_DN1015_c1_g2	TRINITY_DN14634_c0_g1		TRINITY_DN13495_c5_g2	TRINITY_DN22815_c0_g1	TRINITY_DN22732_c0_g1	TRINITY_DN8070_c0_g1	TRINITY_DN34954_c0_g1	TRINITY_DN43186_c0_g4	OG0001077	1	1	0	1	1	1	1	1	1	0	OG0001077	TRINITY_UK00000_c0_g1	TRINITY_DN22815_c0_g1	TRINITY_DN43186_c0_g4	TRINITY_DN22732_c0_g1	TRINITY_DN8070_c0_g1	TRINITY_DN13495_c5_g2	TRINITY_DN34954_c0_g1
OG0001080	TRINITY_DN29741_c0_g1	TRINITY_DN26297_c0_g1		TRINITY_DN3217_c0_g2	TRINITY_DN28738_c0_g1	TRINITY_DN49363_c0_g1, TRINITY_DN49642_c0_g1, TRINITY_DN59327_c0_g1	TRINITY_DN1593_c0_g1, TRINITY_DN27519_c0_g1, TRINITY_DN5936_c0_g1	TRINITY_DN17866_c9_g4, TRINITY_DN4224_c0_g1	TRINITY_DN25900_c0_g1	OG0001080	1	1	0	1	1	3	3	2	1	0	OG0001080	TRINITY_DN29741_c0_g1	TRINITY_DN26297_c0_g1		TRINITY_DN3217_c0_g2	TRINITY_DN28738_c0_g1	TRINITY_DN49363_c0_g1	TRINITY_DN27519_c0_g1	TRINITY_DN17866_c9_g4	TRINITY_DN25900_c0_g1	OG0001080	1	1	0	1	1	1	1	1	1	0	OG0001080	TRINITY_UK00000_c0_g1	TRINITY_DN28738_c0_g1	TRINITY_DN25900_c0_g1	TRINITY_DN49363_c0_g1	TRINITY_DN27519_c0_g1	TRINITY_DN3217_c0_g2	TRINITY_DN17866_c9_g4
OG0001081	TRINITY_DN3305_c1_g2, TRINITY_DN5478_c1_g2	TRINITY_DN21819_c1_g1, TRINITY_DN21846_c5_g5, TRINITY_DN22278_c6_g3		TRINITY_DN12501_c12_g1	TRINITY_DN31858_c0_g1, TRINITY_DN9957_c0_g2	TRINITY_DN21754_c14_g2	TRINITY_DN19992_c5_g5	TRINITY_DN21338_c0_g5	TRINITY_DN43363_c3_g2, TRINITY_DN43363_c3_g6	OG0001081	2	3	0	1	2	1	1	1	2	0	OG0001081	TRINITY_DN3305_c1_g2	TRINITY_DN22278_c6_g3		TRINITY_DN12501_c12_g1	TRINITY_DN9957_c0_g2	TRINITY_DN21754_c14_g2	TRINITY_DN19992_c5_g5	TRINITY_DN21338_c0_g5	TRINITY_DN43363_c3_g2	OG0001081	1	1	0	1	1	1	1	1	1	0	OG0001081	TRINITY_UK00000_c0_g1	TRINITY_DN9957_c0_g2	TRINITY_DN43363_c3_g2	TRINITY_DN21754_c14_g2	TRINITY_DN19992_c5_g5	TRINITY_DN12501_c12_g1	TRINITY_DN21338_c0_g5
OG0001083	TRINITY_DN22032_c1_g1	TRINITY_DN21145_c4_g1		TRINITY_DN11859_c0_g3	TRINITY_DN37996_c0_g1, TRINITY_DN42651_c0_g1	TRINITY_DN41562_c0_g1, TRINITY_DN47490_c0_g1	TRINITY_DN46140_c0_g1	TRINITY_DN24639_c0_g1, TRINITY_DN4372_c0_g1	TRINITY_DN23704_c0_g1, TRINITY_DN7601_c0_g1, TRINITY_DN80044_c0_g1	OG0001083	1	1	0	1	2	2	1	2	3	0	OG0001083	TRINITY_DN22032_c1_g1	TRINITY_DN21145_c4_g1		TRINITY_DN11859_c0_g3	TRINITY_DN42651_c0_g1	TRINITY_DN47490_c0_g1	TRINITY_DN46140_c0_g1	TRINITY_DN4372_c0_g1	TRINITY_DN80044_c0_g1	OG0001083	1	1	0	1	1	1	1	1	1	0	OG0001083	TRINITY_UK00000_c0_g1	TRINITY_DN42651_c0_g1	TRINITY_DN80044_c0_g1	TRINITY_DN47490_c0_g1	TRINITY_DN46140_c0_g1	TRINITY_DN11859_c0_g3	TRINITY_DN4372_c0_g1
OG0001084	TRINITY_DN4968_c0_g1	TRINITY_DN21536_c4_g7		TRINITY_DN13540_c8_g1	TRINITY_DN44118_c0_g1	TRINITY_DN4872_c0_g1, TRINITY_DN4872_c0_g2	TRINITY_DN39775_c0_g1, TRINITY_DN9387_c0_g1, TRINITY_DN9387_c0_g2	TRINITY_DN25620_c0_g1, TRINITY_DN27321_c0_g1, TRINITY_DN29799_c0_g1	TRINITY_DN37187_c0_g1	OG0001084	1	1	0	1	1	2	3	3	1	0	OG0001084	TRINITY_DN4968_c0_g1	TRINITY_DN21536_c4_g7		TRINITY_DN13540_c8_g1	TRINITY_DN44118_c0_g1	TRINITY_DN4872_c0_g2	TRINITY_DN9387_c0_g1	TRINITY_DN27321_c0_g1	TRINITY_DN37187_c0_g1	OG0001084	1	1	0	1	1	1	1	1	1	0	OG0001084	TRINITY_UK00000_c0_g1	TRINITY_DN44118_c0_g1	TRINITY_DN37187_c0_g1	TRINITY_DN4872_c0_g2	TRINITY_DN9387_c0_g1	TRINITY_DN13540_c8_g1	TRINITY_DN27321_c0_g1
OG0001089	TRINITY_DN11790_c1_g1, TRINITY_DN11790_c3_g1	TRINITY_DN18500_c14_g1, TRINITY_DN20004_c2_g1	TRINITY_DN10003_c1_g1		TRINITY_DN30545_c0_g1	TRINITY_DN24012_c14_g4	TRINITY_DN19020_c4_g1, TRINITY_DN22888_c1_g6	TRINITY_DN17855_c0_g1, TRINITY_DN17855_c0_g2	TRINITY_DN45675_c3_g1	OG0001089	2	2	1	0	1	1	2	2	1	0	OG0001089	TRINITY_DN11790_c1_g1	TRINITY_DN20004_c2_g1	TRINITY_DN10003_c1_g1		TRINITY_DN30545_c0_g1	TRINITY_DN24012_c14_g4	TRINITY_DN22888_c1_g6	TRINITY_DN17855_c0_g2	TRINITY_DN45675_c3_g1	OG0001089	1	1	1	0	1	1	1	1	1	0	OG0001089	TRINITY_DN10003_c1_g1	TRINITY_DN30545_c0_g1	TRINITY_DN45675_c3_g1	TRINITY_DN24012_c14_g4	TRINITY_DN22888_c1_g6	TRINITY_UK00000_c0_g1	TRINITY_DN17855_c0_g2
OG0001091	TRINITY_DN2896_c1_g2	TRINITY_DN18979_c3_g1	TRINITY_DN10233_c2_g2	TRINITY_DN16911_c4_g1	TRINITY_DN16393_c4_g3	TRINITY_DN23333_c3_g1	TRINITY_DN23526_c1_g2	TRINITY_DN19148_c1_g1, TRINITY_DN19148_c1_g2	TRINITY_DN11995_c0_g1, TRINITY_DN13423_c0_g1, TRINITY_DN91175_c0_g1	OG0001091	1	1	1	1	1	1	1	2	3	0	OG0001091	TRINITY_DN2896_c1_g2	TRINITY_DN18979_c3_g1	TRINITY_DN10233_c2_g2	TRINITY_DN16911_c4_g1	TRINITY_DN16393_c4_g3	TRINITY_DN23333_c3_g1	TRINITY_DN23526_c1_g2	TRINITY_DN19148_c1_g1	TRINITY_DN13423_c0_g1	OG0001091	1	1	1	1	1	1	1	1	1	1	OG0001091	TRINITY_DN10233_c2_g2	TRINITY_DN16393_c4_g3	TRINITY_DN13423_c0_g1	TRINITY_DN23333_c3_g1	TRINITY_DN23526_c1_g2	TRINITY_DN16911_c4_g1	TRINITY_DN19148_c1_g1
OG0001092	TRINITY_DN2944_c0_g1	TRINITY_DN22059_c0_g2, TRINITY_DN28544_c0_g1	TRINITY_DN1029_c0_g1	TRINITY_DN16511_c6_g2	TRINITY_DN19355_c8_g1, TRINITY_DN22428_c0_g1, TRINITY_DN30350_c0_g1	TRINITY_DN23309_c7_g1	TRINITY_DN22853_c3_g1	TRINITY_DN18367_c6_g1	TRINITY_DN46161_c0_g1	OG0001092	1	2	1	1	3	1	1	1	1	0	OG0001092	TRINITY_DN2944_c0_g1	TRINITY_DN22059_c0_g2	TRINITY_DN1029_c0_g1	TRINITY_DN16511_c6_g2	TRINITY_DN19355_c8_g1	TRINITY_DN23309_c7_g1	TRINITY_DN22853_c3_g1	TRINITY_DN18367_c6_g1	TRINITY_DN46161_c0_g1	OG0001092	1	1	1	1	1	1	1	1	1	1	OG0001092	TRINITY_DN1029_c0_g1	TRINITY_DN19355_c8_g1	TRINITY_DN46161_c0_g1	TRINITY_DN23309_c7_g1	TRINITY_DN22853_c3_g1	TRINITY_DN16511_c6_g2	TRINITY_DN18367_c6_g1
OG0001093	TRINITY_DN1316_c0_g1	TRINITY_DN21667_c10_g2, TRINITY_DN21667_c10_g3, TRINITY_DN64338_c0_g1	TRINITY_DN1036_c0_g1	TRINITY_DN16356_c5_g1, TRINITY_DN20686_c3_g1	TRINITY_DN18615_c3_g1	TRINITY_DN22810_c8_g1	TRINITY_DN23943_c5_g2	TRINITY_DN17801_c10_g1	TRINITY_DN47633_c6_g1	OG0001093	1	3	1	2	1	1	1	1	1	0	OG0001093	TRINITY_DN1316_c0_g1	TRINITY_DN21667_c10_g2	TRINITY_DN1036_c0_g1	TRINITY_DN16356_c5_g1	TRINITY_DN18615_c3_g1	TRINITY_DN22810_c8_g1	TRINITY_DN23943_c5_g2	TRINITY_DN17801_c10_g1	TRINITY_DN47633_c6_g1	OG0001093	1	1	1	1	1	1	1	1	1	1	OG0001093	TRINITY_DN1036_c0_g1	TRINITY_DN18615_c3_g1	TRINITY_DN47633_c6_g1	TRINITY_DN22810_c8_g1	TRINITY_DN23943_c5_g2	TRINITY_DN16356_c5_g1	TRINITY_DN17801_c10_g1
OG0001094	TRINITY_DN1529_c0_g1	TRINITY_DN21881_c12_g1	TRINITY_DN1059_c0_g1	TRINITY_DN17934_c6_g3, TRINITY_DN17934_c6_g5	TRINITY_DN15690_c0_g3	TRINITY_DN20022_c0_g1, TRINITY_DN20022_c0_g2	TRINITY_DN18853_c8_g1	TRINITY_DN19156_c3_g2	TRINITY_DN41309_c0_g1, TRINITY_DN41309_c0_g2	OG0001094	1	1	1	2	1	2	1	1	2	0	OG0001094	TRINITY_DN1529_c0_g1	TRINITY_DN21881_c12_g1	TRINITY_DN1059_c0_g1	TRINITY_DN17934_c6_g3	TRINITY_DN15690_c0_g3	TRINITY_DN20022_c0_g1	TRINITY_DN18853_c8_g1	TRINITY_DN19156_c3_g2	TRINITY_DN41309_c0_g1	OG0001094	1	1	1	1	1	1	1	1	1	1	OG0001094	TRINITY_DN1059_c0_g1	TRINITY_DN15690_c0_g3	TRINITY_DN41309_c0_g1	TRINITY_DN20022_c0_g1	TRINITY_DN18853_c8_g1	TRINITY_DN17934_c6_g3	TRINITY_DN19156_c3_g2
OG0001095	TRINITY_DN30994_c0_g2	TRINITY_DN19609_c7_g1	TRINITY_DN10740_c0_g1, TRINITY_DN10740_c1_g1	TRINITY_DN19284_c12_g1	TRINITY_DN16797_c7_g3	TRINITY_DN22416_c4_g2, TRINITY_DN22416_c4_g3	TRINITY_DN19366_c6_g1	TRINITY_DN20496_c7_g7	TRINITY_DN17495_c0_g1, TRINITY_DN44612_c6_g1	OG0001095	1	1	2	1	1	2	1	1	2	0	OG0001095	TRINITY_DN30994_c0_g2	TRINITY_DN19609_c7_g1	TRINITY_DN10740_c0_g1	TRINITY_DN19284_c12_g1	TRINITY_DN16797_c7_g3	TRINITY_DN22416_c4_g2	TRINITY_DN19366_c6_g1	TRINITY_DN20496_c7_g7	TRINITY_DN44612_c6_g1	OG0001095	1	1	1	1	1	1	1	1	1	1	OG0001095	TRINITY_DN10740_c0_g1	TRINITY_DN16797_c7_g3	TRINITY_DN44612_c6_g1	TRINITY_DN22416_c4_g2	TRINITY_DN19366_c6_g1	TRINITY_DN19284_c12_g1	TRINITY_DN20496_c7_g7
OG0001096	TRINITY_DN17_c0_g2	TRINITY_DN21764_c5_g1	TRINITY_DN10776_c0_g2, TRINITY_DN12819_c1_g1	TRINITY_DN19527_c0_g1		TRINITY_DN24587_c13_g1, TRINITY_DN24587_c13_g2	TRINITY_DN23539_c1_g2	TRINITY_DN20900_c5_g1	TRINITY_DN46235_c0_g1, TRINITY_DN46235_c3_g1, TRINITY_DN46235_c3_g2	OG0001096	1	1	2	1	0	2	1	1	3	0	OG0001096	TRINITY_DN17_c0_g2	TRINITY_DN21764_c5_g1	TRINITY_DN10776_c0_g2	TRINITY_DN19527_c0_g1		TRINITY_DN24587_c13_g2	TRINITY_DN23539_c1_g2	TRINITY_DN20900_c5_g1	TRINITY_DN46235_c3_g2	OG0001096	1	1	1	1	0	1	1	1	1	0	OG0001096	TRINITY_DN10776_c0_g2	TRINITY_UK00000_c0_g1	TRINITY_DN46235_c3_g2	TRINITY_DN24587_c13_g2	TRINITY_DN23539_c1_g2	TRINITY_DN19527_c0_g1	TRINITY_DN20900_c5_g1
OG0001098	TRINITY_DN2825_c1_g2	TRINITY_DN18236_c3_g1, TRINITY_DN18236_c3_g4, TRINITY_DN40549_c0_g1	TRINITY_DN10_c3_g1	TRINITY_DN19892_c12_g2	TRINITY_DN19338_c8_g1	TRINITY_DN22454_c2_g2	TRINITY_DN23448_c1_g1, TRINITY_DN24033_c2_g2	TRINITY_DN18551_c6_g3	TRINITY_DN47694_c4_g1	OG0001098	1	3	1	1	1	1	2	1	1	0	OG0001098	TRINITY_DN2825_c1_g2	TRINITY_DN18236_c3_g4	TRINITY_DN10_c3_g1	TRINITY_DN19892_c12_g2	TRINITY_DN19338_c8_g1	TRINITY_DN22454_c2_g2	TRINITY_DN23448_c1_g1	TRINITY_DN18551_c6_g3	TRINITY_DN47694_c4_g1	OG0001098	1	1	1	1	1	1	1	1	1	1	OG0001098	TRINITY_DN10_c3_g1	TRINITY_DN19338_c8_g1	TRINITY_DN47694_c4_g1	TRINITY_DN22454_c2_g2	TRINITY_DN23448_c1_g1	TRINITY_DN19892_c12_g2	TRINITY_DN18551_c6_g3
OG0001099	TRINITY_DN2723_c0_g2	TRINITY_DN21199_c5_g1	TRINITY_DN1111_c0_g2	TRINITY_DN14095_c6_g4, TRINITY_DN20528_c1_g2	TRINITY_DN19005_c2_g2	TRINITY_DN21830_c8_g2	TRINITY_DN18434_c3_g1, TRINITY_DN20497_c8_g1	TRINITY_DN20248_c4_g1	TRINITY_DN42095_c17_g1, TRINITY_DN45558_c9_g4	OG0001099	1	1	1	2	1	1	2	1	2	0	OG0001099	TRINITY_DN2723_c0_g2	TRINITY_DN21199_c5_g1	TRINITY_DN1111_c0_g2	TRINITY_DN14095_c6_g4	TRINITY_DN19005_c2_g2	TRINITY_DN21830_c8_g2	TRINITY_DN20497_c8_g1	TRINITY_DN20248_c4_g1	TRINITY_DN42095_c17_g1	OG0001099	1	1	1	1	1	1	1	1	1	1	OG0001099	TRINITY_DN1111_c0_g2	TRINITY_DN19005_c2_g2	TRINITY_DN42095_c17_g1	TRINITY_DN21830_c8_g2	TRINITY_DN20497_c8_g1	TRINITY_DN14095_c6_g4	TRINITY_DN20248_c4_g1
OG0001100	TRINITY_DN3039_c2_g1	TRINITY_DN22772_c6_g1, TRINITY_DN23932_c4_g1	TRINITY_DN114_c0_g2	TRINITY_DN15427_c7_g1, TRINITY_DN18075_c6_g1	TRINITY_DN18977_c1_g5, TRINITY_DN18977_c1_g8	TRINITY_DN23477_c11_g1	TRINITY_DN18462_c7_g1	TRINITY_DN18714_c2_g7	TRINITY_DN46798_c0_g1	OG0001100	1	2	1	2	2	1	1	1	1	0	OG0001100	TRINITY_DN3039_c2_g1	TRINITY_DN22772_c6_g1	TRINITY_DN114_c0_g2	TRINITY_DN15427_c7_g1	TRINITY_DN18977_c1_g8	TRINITY_DN23477_c11_g1	TRINITY_DN18462_c7_g1	TRINITY_DN18714_c2_g7	TRINITY_DN46798_c0_g1	OG0001100	1	1	1	1	1	1	1	1	1	1	OG0001100	TRINITY_DN114_c0_g2	TRINITY_DN18977_c1_g8	TRINITY_DN46798_c0_g1	TRINITY_DN23477_c11_g1	TRINITY_DN18462_c7_g1	TRINITY_DN15427_c7_g1	TRINITY_DN18714_c2_g7
OG0001101	TRINITY_DN5634_c0_g1	TRINITY_DN20295_c4_g1, TRINITY_DN42960_c0_g1	TRINITY_DN114_c1_g2, TRINITY_DN647_c0_g2	TRINITY_DN17333_c7_g1	TRINITY_DN17744_c2_g2	TRINITY_DN22215_c6_g1, TRINITY_DN24107_c4_g1	TRINITY_DN17752_c0_g1	TRINITY_DN20229_c5_g2	TRINITY_DN42375_c0_g1	OG0001101	1	2	2	1	1	2	1	1	1	0	OG0001101	TRINITY_DN5634_c0_g1	TRINITY_DN20295_c4_g1	TRINITY_DN114_c1_g2	TRINITY_DN17333_c7_g1	TRINITY_DN17744_c2_g2	TRINITY_DN22215_c6_g1	TRINITY_DN17752_c0_g1	TRINITY_DN20229_c5_g2	TRINITY_DN42375_c0_g1	OG0001101	1	1	1	1	1	1	1	1	1	1	OG0001101	TRINITY_DN114_c1_g2	TRINITY_DN17744_c2_g2	TRINITY_DN42375_c0_g1	TRINITY_DN22215_c6_g1	TRINITY_DN17752_c0_g1	TRINITY_DN17333_c7_g1	TRINITY_DN20229_c5_g2
OG0001102	TRINITY_DN25016_c4_g1, TRINITY_DN55521_c0_g1	TRINITY_DN23702_c8_g1	TRINITY_DN11549_c0_g1, TRINITY_DN11549_c1_g1	TRINITY_DN18050_c5_g1, TRINITY_DN18050_c5_g2	TRINITY_DN19794_c9_g1	TRINITY_DN20751_c0_g2	TRINITY_DN19712_c8_g1	TRINITY_DN18102_c7_g1	TRINITY_DN44038_c1_g1	OG0001102	2	1	2	2	1	1	1	1	1	0	OG0001102	TRINITY_DN55521_c0_g1	TRINITY_DN23702_c8_g1	TRINITY_DN11549_c0_g1	TRINITY_DN18050_c5_g2	TRINITY_DN19794_c9_g1	TRINITY_DN20751_c0_g2	TRINITY_DN19712_c8_g1	TRINITY_DN18102_c7_g1	TRINITY_DN44038_c1_g1	OG0001102	1	1	1	1	1	1	1	1	1	1	OG0001102	TRINITY_DN11549_c0_g1	TRINITY_DN19794_c9_g1	TRINITY_DN44038_c1_g1	TRINITY_DN20751_c0_g2	TRINITY_DN19712_c8_g1	TRINITY_DN18050_c5_g2	TRINITY_DN18102_c7_g1
OG0001104		TRINITY_DN18760_c1_g4, TRINITY_DN18760_c1_g5, TRINITY_DN19780_c4_g1	TRINITY_DN11600_c1_g1	TRINITY_DN12386_c5_g1	TRINITY_DN17144_c10_g4	TRINITY_DN24234_c8_g3	TRINITY_DN27998_c0_g1, TRINITY_DN45637_c0_g1	TRINITY_DN20970_c5_g3	TRINITY_DN19639_c0_g1, TRINITY_DN70045_c0_g1	OG0001104	0	3	1	1	1	1	2	1	2	0	OG0001104		TRINITY_DN19780_c4_g1	TRINITY_DN11600_c1_g1	TRINITY_DN12386_c5_g1	TRINITY_DN17144_c10_g4	TRINITY_DN24234_c8_g3	TRINITY_DN45637_c0_g1	TRINITY_DN20970_c5_g3	TRINITY_DN19639_c0_g1	OG0001104	0	1	1	1	1	1	1	1	1	0	OG0001104	TRINITY_DN11600_c1_g1	TRINITY_DN17144_c10_g4	TRINITY_DN19639_c0_g1	TRINITY_DN24234_c8_g3	TRINITY_DN45637_c0_g1	TRINITY_DN12386_c5_g1	TRINITY_DN20970_c5_g3
OG0001105	TRINITY_DN15500_c1_g1, TRINITY_DN15500_c5_g1	TRINITY_DN18192_c11_g2	TRINITY_DN11685_c16_g1	TRINITY_DN20882_c6_g3	TRINITY_DN13737_c0_g2	TRINITY_DN47849_c0_g1	TRINITY_DN11946_c0_g1, TRINITY_DN11946_c0_g2	TRINITY_DN31576_c0_g1, TRINITY_DN34199_c0_g1	TRINITY_DN83009_c0_g1	OG0001105	2	1	1	1	1	1	2	2	1	0	OG0001105	TRINITY_DN15500_c5_g1	TRINITY_DN18192_c11_g2	TRINITY_DN11685_c16_g1	TRINITY_DN20882_c6_g3	TRINITY_DN13737_c0_g2	TRINITY_DN47849_c0_g1	TRINITY_DN11946_c0_g2	TRINITY_DN34199_c0_g1	TRINITY_DN83009_c0_g1	OG0001105	1	1	1	1	1	1	1	1	1	1	OG0001105	TRINITY_DN11685_c16_g1	TRINITY_DN13737_c0_g2	TRINITY_DN83009_c0_g1	TRINITY_DN47849_c0_g1	TRINITY_DN11946_c0_g2	TRINITY_DN20882_c6_g3	TRINITY_DN34199_c0_g1
OG0001106	TRINITY_DN1334_c24_g1, TRINITY_DN13578_c0_g2	TRINITY_DN20130_c6_g1	TRINITY_DN1173_c0_g2	TRINITY_DN17421_c5_g3, TRINITY_DN19969_c1_g1	TRINITY_DN18943_c5_g1	TRINITY_DN22760_c6_g1	TRINITY_DN20742_c10_g1, TRINITY_DN22208_c7_g2	TRINITY_DN19935_c4_g2	TRINITY_DN44819_c0_g1	OG0001106	2	1	1	2	1	1	2	1	1	0	OG0001106	TRINITY_DN1334_c24_g1	TRINITY_DN20130_c6_g1	TRINITY_DN1173_c0_g2	TRINITY_DN17421_c5_g3	TRINITY_DN18943_c5_g1	TRINITY_DN22760_c6_g1	TRINITY_DN20742_c10_g1	TRINITY_DN19935_c4_g2	TRINITY_DN44819_c0_g1	OG0001106	1	1	1	1	1	1	1	1	1	1	OG0001106	TRINITY_DN1173_c0_g2	TRINITY_DN18943_c5_g1	TRINITY_DN44819_c0_g1	TRINITY_DN22760_c6_g1	TRINITY_DN20742_c10_g1	TRINITY_DN17421_c5_g3	TRINITY_DN19935_c4_g2
OG0001108	TRINITY_DN4520_c0_g1	TRINITY_DN18652_c6_g1	TRINITY_DN11961_c0_g2, TRINITY_DN5294_c0_g1	TRINITY_DN12800_c1_g2	TRINITY_DN18953_c3_g1	TRINITY_DN24437_c1_g1	TRINITY_DN4422_c0_g1	TRINITY_DN21636_c0_g1, TRINITY_DN39126_c0_g1, TRINITY_DN43092_c0_g1	TRINITY_DN44462_c0_g1	OG0001108	1	1	2	1	1	1	1	3	1	0	OG0001108	TRINITY_DN4520_c0_g1	TRINITY_DN18652_c6_g1	TRINITY_DN5294_c0_g1	TRINITY_DN12800_c1_g2	TRINITY_DN18953_c3_g1	TRINITY_DN24437_c1_g1	TRINITY_DN4422_c0_g1	TRINITY_DN39126_c0_g1	TRINITY_DN44462_c0_g1	OG0001108	1	1	1	1	1	1	1	1	1	1	OG0001108	TRINITY_DN5294_c0_g1	TRINITY_DN18953_c3_g1	TRINITY_DN44462_c0_g1	TRINITY_DN24437_c1_g1	TRINITY_DN4422_c0_g1	TRINITY_DN12800_c1_g2	TRINITY_DN39126_c0_g1
OG0001110	TRINITY_DN1049_c1_g5	TRINITY_DN19075_c6_g1, TRINITY_DN21025_c6_g1	TRINITY_DN12217_c1_g1	TRINITY_DN17742_c9_g1	TRINITY_DN17535_c2_g8, TRINITY_DN19529_c10_g1	TRINITY_DN22137_c4_g1	TRINITY_DN22737_c5_g1	TRINITY_DN17899_c4_g1	TRINITY_DN43563_c7_g1, TRINITY_DN47230_c5_g1	OG0001110	1	2	1	1	2	1	1	1	2	0	OG0001110	TRINITY_DN1049_c1_g5	TRINITY_DN21025_c6_g1	TRINITY_DN12217_c1_g1	TRINITY_DN17742_c9_g1	TRINITY_DN19529_c10_g1	TRINITY_DN22137_c4_g1	TRINITY_DN22737_c5_g1	TRINITY_DN17899_c4_g1	TRINITY_DN47230_c5_g1	OG0001110	1	1	1	1	1	1	1	1	1	1	OG0001110	TRINITY_DN12217_c1_g1	TRINITY_DN19529_c10_g1	TRINITY_DN47230_c5_g1	TRINITY_DN22137_c4_g1	TRINITY_DN22737_c5_g1	TRINITY_DN17742_c9_g1	TRINITY_DN17899_c4_g1
OG0001112	TRINITY_DN2816_c0_g2	TRINITY_DN19317_c5_g1, TRINITY_DN22564_c5_g2	TRINITY_DN12459_c0_g1	TRINITY_DN20446_c2_g3	TRINITY_DN19599_c1_g3, TRINITY_DN19599_c1_g5	TRINITY_DN20585_c0_g1	TRINITY_DN19817_c7_g1	TRINITY_DN16968_c0_g1	TRINITY_DN40896_c0_g1, TRINITY_DN75516_c0_g1	OG0001112	1	2	1	1	2	1	1	1	2	0	OG0001112	TRINITY_DN2816_c0_g2	TRINITY_DN22564_c5_g2	TRINITY_DN12459_c0_g1	TRINITY_DN20446_c2_g3	TRINITY_DN19599_c1_g3	TRINITY_DN20585_c0_g1	TRINITY_DN19817_c7_g1	TRINITY_DN16968_c0_g1	TRINITY_DN40896_c0_g1	OG0001112	1	1	1	1	1	1	1	1	1	1	OG0001112	TRINITY_DN12459_c0_g1	TRINITY_DN19599_c1_g3	TRINITY_DN40896_c0_g1	TRINITY_DN20585_c0_g1	TRINITY_DN19817_c7_g1	TRINITY_DN20446_c2_g3	TRINITY_DN16968_c0_g1
[truncated: 62,361 more rows]
[truncated: 17 more columns]
