# Supplementary material for: Social complexity, life-history and lineage influence the molecular basis of caste in a major transition in evolution
Source: Research Square preprint supplement (doi:10.21203/rs.3.rs-835604/v1), 2021-08-27
Supplement: Supplementary file 6 [file d178f26c676bb805260f09e2.xlsx]

## Sheet: Vespa_Swarm
	Row.names	V_cra Queen	V_cra Worker	A_pal Queen.x	A_pal Worker.x	A_caj Queen.x	A_caj Worker.x	P_qua Queen.x	P_qua Worker.x	M_cin Queen.x	M_cin Worker.x	A_pal Queen.y	A_pal Worker.y	A_caj Queen.y	A_caj Worker.y	P_qua Queen.y	P_qua Worker.y	M_cin Queen.y	M_cin Worker.y	p.coeffs	q.coeffs
1	OG0000228	10010.5	8278.32	8710.02	7015.99	11325.6	10139.8	10438.5	12123.8	2908.42	4615.28	0.804534	-0.804534	0.412573	-0.412573	-0.557887	0.557887	-1.69437	1.69437	0.535983	1
2	OG0000242	117.277	198.522	1804.55	860.737	575.803	500.516	652.905	632.503	5594.72	3082.11	1.41814	-1.41814	0.280125	-0.280125	0.0635617	-0.0635617	1.15969	-1.15969	0.0202586	1
3	OG0000363	289.416	139.237	5826.76	3576.09	13886.4	12765.6	2454.12	2513.93	8010.91	9858.04	1.15688	-1.15688	0.203263	-0.203263	-0.0581886	0.0581886	-0.499612	0.499612	0.448861	1
4	OG0000429	235.544	1133.86	14632.8	11178.6	27228.2	24428.6	938.562	2311.99	26576.8	26641.4	0.357742	-0.357742	0.144881	-0.144881	-1.12951	1.12951	-0.00324208	0.00324208	0.527595	1
5	OG0000461	9587.21	11883.1	6546.33	8239.92	3944.46	2634.59	5766.53	5595.21	1986.28	2479.95	-0.877674	0.877674	1.52563	-1.52563	0.115546	-0.115546	-0.846994	0.846994	0.960008	1
6	OG0000464	2681.78	3321.35	709.737	896.478	1322.38	1542.61	439.777	479.959	964.313	1580.43	-0.816201	0.816201	-0.539672	0.539672	-0.306709	0.306709	-1.69973	1.69973	0.0079741	1
7	OG0000536	105.212	78.8043	336.015	321.212	285.151	318.575	145.63	172.54	464.276	502.418	0.263506	-0.263506	-0.647705	0.647705	-0.989497	0.989497	-0.46161	0.46161	0.0495273	1
8	OG0000546	217.08	314.935	2362.68	2604.98	2301.05	2200.52	2910.16	3411.77	1659.23	2970.89	-0.294719	0.294719	0.134936	-0.134936	-0.479422	0.479422	-1.71171	1.71171	0.0806827	1
9	OG0000632	45.3785	49.6577	1069.18	970.588	583.751	626.188	594.967	591.564	1595.39	1496.02	1.2587	-1.2587	-0.913404	0.913404	0.0746923	-0.0746923	0.837123	-0.837123	0.387374	1
10	OG0000680	273.389	278.994	1371.23	1125.81	1044.06	1607.86	819.552	806.313	1512.47	1470.59	0.887176	-0.887176	-1.91913	1.91913	0.0735021	-0.0735021	0.126719	-0.126719	0.641414	1
11	OG0000716	521.603	644.827	1078.34	833.797	917.135	698.531	357.278	345.925	984.245	1101.04	1.22284	-1.22284	1.29372	-1.29372	0.154367	-0.154367	-0.535554	0.535554	0.138165	1
12	OG0000719	443.209	544.01	533.166	531.355	824.638	845.904	368.485	384.01	493.164	540.898	0.0314724	-0.0314724	-0.235514	0.235514	-0.381692	0.381692	-0.85404	0.85404	0.0336061	1
13	OG0000749	237.655	119.091	248.809	250.123	1104.3	1178.06	414.309	434.999	614.836	630.959	-0.0166681	0.0166681	-0.204621	0.204621	-0.154237	0.154237	-0.0819352	0.0819352	0.00771961	1
14	OG0000750	819.558	788.366	1847.36	1422.51	1665.45	1312.1	92.7179	258.756	1424.97	2007	0.517862	-0.517862	0.472991	-0.472991	-1.88288	1.88288	-0.67594	0.67594	0.367219	1
15	OG0000775	103.404	136.24	110.739	113.33	153.627	151.58	87.3617	86.0052	122.134	150.727	-0.141618	0.141618	0.0821358	-0.0821358	0.0958328	-0.0958328	-1.28351	1.28351	0.227999	1
16	OG0000788	744.027	968.905	677.159	568.095	122.482	292.724	257.266	223.702	833.583	919.258	0.415156	-0.415156	-1.94353	1.94353	0.33078	-0.33078	-0.231683	0.231683	0.391935	1
17	OG0000818	148.03	181.269	1964.11	1701.66	2160.06	2209.12	2094.37	1496.89	2547.55	2119.23	0.668958	-0.668958	-0.104923	0.104923	1.55451	-1.55451	0.857566	-0.857566	0.0215295	1
18	OG0000871	702.259	786.839	374.875	329.381	251.018	278.406	176.453	182.697	413.743	482.111	1.07659	-1.07659	-0.862139	0.862139	-0.289737	0.289737	-1.27187	1.27187	0.388452	1
19	OG0000890	248.798	236.671	504.734	559.164	313.529	380.239	735.157	784.941	802.546	942.564	-0.767461	0.767461	-1.44243	1.44243	-0.491289	0.491289	-1.20358	1.20358	0.00065156	1
20	OG0000892	152.934	184.9	302.049	254.639	752.648	687.775	173.653	181.638	534.72	491.194	1.26057	-1.26057	0.666621	-0.666621	-0.332677	0.332677	0.627984	-0.627984	0.0544654	1
21	OG0000937	32.8873	25.4087	329.377	305.567	297.827	307.028	217.416	234.955	269.901	278.469	0.564716	-0.564716	-0.22909	0.22909	-0.583873	0.583873	-0.235298	0.235298	0.508268	1
22	OG0000939	138.802	401.415	451.439	438.71	225.384	189.673	18.4613	94.4661	298.53	961.011	0.0307454	-0.0307454	0.184978	-0.184978	-1.447	1.447	-1.1308	1.1308	0.0875545	1
23	OG0000975	44.3996	30.8109	139.018	146.179	232.711	225.519	197.141	215.487	232.498	223.679	-0.281233	0.281233	0.175795	-0.175795	-0.497997	0.497997	0.216532	-0.216532	0.464107	1
24	OG0000976	81.9755	97.5395	309.472	342.939	128.648	159.524	141.097	193.803	181.476	177.449	-0.504517	0.504517	-1.05378	1.05378	-1.54781	1.54781	0.110337	-0.110337	0.0250544	1
25	OG0000981	153.288	77.2422	493.037	470.697	228.18	252.373	256.068	319.798	764.905	496.806	0.119516	-0.119516	-0.259563	0.259563	-0.570581	0.570581	1.09554	-1.09554	0.719719	1
26	OG0000999	1319.53	909.716	146.443	143.398	95.8701	108.472	180.741	176.455	140.376	142.44	0.114461	-0.114461	-0.671951	0.671951	0.130737	-0.130737	-0.0795132	0.0795132	0.377726	1
27	OG0001022	260.78	296.852	963.333	943.647	434.034	427.286	354.063	408.233	667.475	1047.32	0.0905638	-0.0905638	0.0687351	-0.0687351	-0.623421	0.623421	-1.94329	1.94329	0.124546	1
28	OG0001030	853.045	957.562	605.361	488.075	1076.15	1025.23	453.402	500.163	768.837	660.54	1.48211	-1.48211	0.334833	-0.334833	-0.677582	0.677582	1.04688	-1.04688	0.152329	1
29	OG0001032	314.293	346.912	999.511	1103.73	628.964	659.485	422.996	438.607	631.924	644.049	-1.3721	1.3721	-0.655953	0.655953	-0.501698	0.501698	-0.263125	0.263125	0.00610305	1
30	OG0001053	69.6065	52.0544	158.451	155.913	290.225	314.032	75.164	89.4962	131.372	150.992	0.0917523	-0.0917523	-0.447787	0.447787	-0.98928	0.98928	-0.789743	0.789743	0.0188219	1
31	OG0001090	127.042	183.297	115.48	155.216	309.895	321.363	102.361	122.713	68.3411	149.119	-0.694744	0.694744	-0.0859795	0.0859795	-0.427977	0.427977	-1.75806	1.75806	0.027128	1
32	OG0001093	48.6437	57.3075	149.917	140.966	166.189	177.085	54.1478	56.1721	161.848	180.389	0.59804	-0.59804	-0.61694	0.61694	-0.356647	0.356647	-1.05292	1.05292	0.198332	1
33	OG0001098	118.45	124.154	315.292	255.958	68.8345	100.447	264.319	264.152	83.1337	108.768	0.870557	-0.870557	-1.56519	1.56519	0.00264693	-0.00264693	-1.11959	1.11959	0.28906	1
34	OG0001099	128.374	181.46	61.9263	62.5737	118.237	93.9399	32.1425	36.814	96.7373	92.9977	-0.0506319	0.0506319	1.1149	-1.1149	-0.659568	0.659568	0.191889	-0.191889	0.587726	1
35	OG0001103	103.109	144.118	176.773	208.577	182.256	184.295	310.216	301.178	184.936	223.412	-0.839906	0.839906	-0.0566199	0.0566199	0.150438	-0.150438	-0.958841	0.958841	0.0728279	1
36	OG0001121	442.133	539.799	339.963	484.077	348.714	340.246	151.812	195.601	153.308	246.667	-1.11354	1.11354	0.0782636	-0.0782636	-0.80255	0.80255	-1.48618	1.48618	0.0124995	1
37	OG0001123	138.025	110.639	118.481	90.5564	113.742	150.213	37.9117	48.0275	270.594	76.7012	0.463003	-0.463003	-0.47888	0.47888	-0.407968	0.407968	1.93499	-1.93499	0.37809	1
38	OG0001132	41.2413	44.2153	337.675	365.015	331.835	325.658	216.012	246.275	236.192	300.653	-0.562674	0.562674	0.135863	-0.135863	-0.946742	0.946742	-1.73647	1.73647	0.0304852	1
39	OG0001140	887.109	1478.55	411.84	396.996	208.844	283.058	475.049	499.209	684.796	578.315	0.127438	-0.127438	-1.04764	1.04764	-0.1722	0.1722	0.585377	-0.585377	0.621175	1
40	OG0001153	455.649	681.395	752.91	1061.84	405.367	383.17	922.324	1198.36	670.477	884.038	-1.11441	1.11441	0.184277	-0.184277	-0.852102	0.852102	-0.899348	0.899348	0.0171834	1
41	OG0001160	388.927	452.551	96.8388	86.9097	138.507	182.7	132.608	130.436	160.004	175.848	0.663359	-0.663359	-1.689	1.689	0.101349	-0.101349	-0.579158	0.579158	0.334017	1
42	OG0001163	126.445	171.614	395.098	443.234	169.606	200.033	101.866	119.962	193.943	261.366	-0.490686	0.490686	-0.703452	0.703452	-0.697116	0.697116	-1.26544	1.26544	0.000531274	1
43	OG0001165	247.55	283.798	560.81	673.886	96.0641	66.3775	358.841	371.844	327.393	477.3	-0.680679	0.680679	1.3583	-1.3583	-0.132271	0.132271	-1.3846	1.3846	0.628465	1
44	OG0001166	477.228	375.132	345.016	287.711	835.803	703.329	270.492	287.108	1016.81	696.965	0.749687	-0.749687	0.712448	-0.712448	-0.246662	0.246662	1.54483	-1.54483	0.0373953	1
45	OG0001170	207.622	227.187	430.007	449.832	288.573	217.631	611.201	676.932	588.721	636.889	-0.294626	0.294626	1.83243	-1.83243	-0.667209	0.667209	-0.513876	0.513876	0.836748	1
46	OG0001172	293.959	372.806	632.217	995.27	895.58	809.33	280.794	365.495	255.125	627.485	-0.925441	0.925441	0.209873	-0.209873	-0.543699	0.543699	-1.75021	1.75021	0.0401481	1
47	OG0001177	227.583	220.345	221.48	166.691	63.2039	119.582	99.8898	110.546	541.647	350.355	0.739639	-0.739639	-1.61631	1.61631	-0.265356	0.265356	1.12379	-1.12379	0.991937	1
48	OG0001182	304.225	368.98	248.128	220.194	380.892	465.958	177.855	168.096	341.936	382.426	0.772632	-0.772632	-1.30114	1.30114	0.365387	-0.365387	-0.724042	0.724042	0.536692	1
49	OG0001183	337.516	575.884	238.07	234.128	193.959	144.071	177.773	188.619	52.6411	72.4227	0.0520274	-0.0520274	0.919815	-0.919815	-0.1845	0.1845	-0.985797	0.985797	0.863865	1
50	OG0001186	334.904	366.785	92.7299	131.928	107.871	88.8778	39.3119	66.5414	199.711	203.104	-1.1259	1.1259	0.622935	-0.622935	-1.65994	1.65994	-0.0543633	0.0543633	0.178922	1
51	OG0001189	68.7589	68.5063	194.306	192.24	482.845	397.026	163.598	162.49	205.483	193.486	0.110848	-0.110848	2.02295	-2.02295	0.0704948	-0.0704948	0.623652	-0.623652	0.0709904	1
52	OG0001198	64.2596	72.7879	347.858	356.495	340.97	313.557	165.933	181.245	277.64	335.034	-0.202511	0.202511	0.691731	-0.691731	-0.728407	0.728407	-1.54714	1.54714	0.227242	1
53	OG0001200	291.607	227.445	201.404	197.411	582.393	630.615	137.884	114.144	301.76	300.378	0.132116	-0.132116	-0.524624	0.524624	1.24308	-1.24308	0.0303048	-0.0303048	0.43248	1
54	OG0001202	127.901	86.0527	77.5658	47.4518	398.87	366.481	151.289	152.317	523.179	674.52	1.51307	-1.51307	0.26582	-0.26582	-0.0212705	0.0212705	-0.793726	0.793726	0.503875	1
55	OG0001231	84.7734	136.134	145.81	153.307	97.4375	92.4896	104.681	122.033	34.6323	82.8451	-0.110961	0.110961	0.11532	-0.11532	-0.338812	0.338812	-1.81669	1.81669	0.131905	1
56	OG0001232	221.749	254.101	1051.75	1152.2	844.357	858.582	613.098	724.221	298.865	443.547	-0.425404	0.425404	-0.0779701	0.0779701	-0.775588	0.775588	-1.81899	1.81899	0.026919	1
57	OG0001236	504.23	630.487	638.522	525.953	484.371	422.614	470.353	475.198	1254.38	1175.33	1.2378	-1.2378	0.871864	-0.871864	-0.0656201	0.0656201	0.416592	-0.416592	0.0216223	1
58	OG0001237	148.114	173.701	640.883	753.084	272.485	247.204	251.948	263.835	415.816	385.895	-1.30606	1.30606	0.78936	-0.78936	-0.373971	0.373971	0.605589	-0.605589	0.842038	1
59	OG0001247	119.05	105.632	2214.66	2142.28	2816.1	2852.41	1233.24	1427.43	1370.51	1613.34	0.280041	-0.280041	-0.10799	0.10799	-1.23041	1.23041	-1.37196	1.37196	0.0805159	1
60	OG0001248	54.4487	60.3972	120.533	107.94	91.1732	211.572	95.8506	91.2946	197.402	199.63	0.288297	-0.288297	-2.08001	2.08001	0.127328	-0.127328	-0.029353	0.029353	0.322844	1
61	OG0001253	259.36	360.873	474.715	518.493	843.265	893.2	305.107	350.789	266.895	303.317	-0.476597	0.476597	-0.310944	0.310944	-0.753108	0.753108	-0.690673	0.690673	0.000237165	0.457017
62	OG0001257	108.746	107.334	824.631	973.893	211.93	218.884	867.951	1079.71	450.915	716.477	-0.661825	0.661825	-0.128719	0.128719	-0.867054	0.867054	-1.81409	1.81409	0.0129802	1
63	OG0001293	123.948	60.7925	163.504	130.711	30.4264	96.0081	48.4627	47.7123	204.104	121.863	0.347834	-0.347834	-1.61873	1.61873	0.0243486	-0.0243486	0.787366	-0.787366	0.767659	1
64	OG0001301	469.687	373.946	193.836	176.079	460.498	445.639	54.1478	55.0084	147.3	164.084	0.75028	-0.75028	0.256317	-0.256317	-0.123243	0.123243	-0.842477	0.842477	0.967068	1
65	OG0001302	443.049	488.901	338.702	246.299	712.287	687.41	167.442	190.045	471.69	509.898	1.83897	-1.83897	0.206924	-0.206924	-0.736132	0.736132	-0.453187	0.453187	0.618213	1
66	OG0001313	179.42	202.53	59.8726	64.1364	178.728	205.661	72.1954	88.122	101.819	117.587	-0.463273	0.463273	-0.944095	0.944095	-1.33858	1.33858	-0.968318	0.968318	0.000332481	0.639361
67	OG0001319	112.144	110.392	1018.15	1160.05	911.44	853.781	1756.96	1735.97	910.13	1280.36	-0.749729	0.749729	0.37592	-0.37592	0.0691478	-0.0691478	-1.94515	1.94515	0.175919	1
68	OG0001320	126.016	203.415	616.972	661.696	310.086	364.081	427.432	506.206	418.589	537.956	-0.253708	0.253708	-0.58094	0.58094	-0.612003	0.612003	-0.905165	0.905165	0.000783363	1
69	OG0001321	184.88	184.331	415.792	482.164	218.644	253.862	342.044	391.093	368.028	471.677	-0.894396	0.894396	-0.901898	0.901898	-0.809562	0.809562	-1.49363	1.49363	9.33448e-05	0.181276
70	OG0001331	2257.37	3033.69	8548.24	5987.38	20933.5	22914.6	4522.45	4218.41	6119.76	7816.03	1.40622	-1.40622	-0.360636	0.360636	0.277635	-0.277635	-0.971546	0.971546	0.814827	1
71	OG0001342	4245.81	4719.2	1441.36	1425.64	446.708	614.138	875.347	632.502	400.352	630.425	0.0361664	-0.0361664	-1.04075	1.04075	1.06203	-1.06203	-1.47186	1.47186	0.412914	1
72	OG0001345	248.834	223.527	686.721	536.954	152.256	224.591	542.302	582.678	833.715	881.632	1.08975	-1.08975	-1.70906	1.70906	-0.319561	0.319561	-0.248725	0.248725	0.490257	1
73	OG0001354	62.989	70.9105	609.626	636.514	456.076	611.007	596.945	603.623	538.791	532.101	-0.288814	0.288814	-1.94345	1.94345	-0.0744619	0.0744619	0.08362	-0.08362	0.144644	1
74	OG0001356	106.124	94.1959	478.508	449.834	330.025	358.631	280.072	319.815	303.148	400.062	0.380796	-0.380796	-0.512118	0.512118	-0.816746	0.816746	-1.69905	1.69905	0.0719443	1
75	OG0001367	529.629	623.261	1240.07	1233.17	1209.22	1216.76	1220.76	1326.15	1157.41	1248.29	0.0598571	-0.0598571	-0.0667397	0.0667397	-0.888899	0.888899	-0.811459	0.811459	0.0497467	1
76	OG0001370	426.428	506.002	371.712	410.727	179.235	179.527	346.151	395.855	255.817	286.484	-0.800619	0.800619	-0.0130784	0.0130784	-1.07555	1.07555	-0.907974	0.907974	0.00570436	1
77	OG0001371	235.697	298.046	1279.89	1181.29	1180.66	1364.08	327.607	408.763	1574.62	1659.84	0.46583	-0.46583	-0.838035	0.838035	-1.28143	1.28143	-0.306353	0.306353	0.114757	1
78	OG0001416	363.633	393.002	383.878	319.821	1013.76	924.347	181.152	191.37	254.665	353.294	0.977907	-0.977907	0.495588	-0.495588	-0.294661	0.294661	-1.74281	1.74281	0.748893	1
79	OG0001418	181351	10793.4	25530.1	3283.73	16644.9	2513.36	14433.7	1963.63	107920	3321.02	0.889458	-0.889458	0.849769	-0.849769	0.87612	-0.87612	1.08325	-1.08325	3.08609e-07	0.000606725
80	OG0001424	143.384	170.942	844.06	1173.08	784.851	723.248	754.253	958.013	454.609	1107.45	-0.7298	0.7298	0.182763	-0.182763	-0.532426	0.532426	-1.86993	1.86993	0.0496982	1
81	OG0001430	18.0473	60.0481	147.392	175.031	228.465	316.009	193.846	194.735	219.109	200.165	-0.319221	0.319221	-0.598767	0.598767	-0.00851992	0.00851992	0.168266	-0.168266	0.164992	1
82	OG0001433	508.269	610.216	347.075	402.73	460.568	409.227	271.255	316.271	347.477	424.915	-0.863854	0.863854	0.686961	-0.686961	-0.89171	0.89171	-1.1668	1.1668	0.109472	1
83	OG0001446	178.157	193.901	159.395	168.256	115.514	114.119	128.818	134.35	431.059	471.68	-0.809192	0.809192	0.181732	-0.181732	-0.62903	0.62903	-1.34651	1.34651	0.0270863	1
84	OG0001448	298.607	498.099	205.368	157.651	450.38	496.655	127.321	148.802	297.413	347.517	0.907286	-0.907286	-0.337269	0.337269	-0.536982	0.536982	-0.536241	0.536241	0.627015	1
85	OG0001456	103.18	61.9358	1288.6	1268.86	193.24	146.065	628.244	705.179	1014.26	1160.63	0.0546982	-0.0546982	0.985083	-0.985083	-0.408797	0.408797	-0.476834	0.476834	0.876793	1
86	OG0001459	59.6001	63.8414	257.659	248.732	635.877	684.218	188.24	190.945	430.51	353.281	0.33325	-0.33325	-0.692272	0.692272	-0.134893	0.134893	1.86269	-1.86269	0.411539	1
87	OG0001466	823.374	1191.43	1178.97	992.837	1624.07	1444.81	192.196	271.133	1523.36	1766.74	0.648374	-0.648374	0.441896	-0.441896	-1.2889	1.2889	-0.559635	0.559635	0.574364	1
88	OG0001470	81.1676	94.144	218.796	220.4	307.733	278.015	117.609	117.528	276.135	302.299	-0.0770773	0.0770773	1.07023	-1.07023	0.00732261	-0.00732261	-0.954197	0.954197	0.969789	1
89	OG0001472	110.093	111.728	402.68	477.299	191.518	215.371	268.101	288.271	267.059	379.746	-0.874098	0.874098	-0.604297	0.604297	-0.37371	0.37371	-1.79592	1.79592	0.00610902	1
90	OG0001476	1096.74	1227.15	1911.16	1818.58	704.931	1199.73	1202.29	1304.99	1199.43	1786.78	0.157615	-0.157615	-1.64952	1.64952	-0.260079	0.260079	-1.24886	1.24886	0.0450964	1
91	OG0001480	43.2206	34.0178	171.563	177.292	215.708	185.924	64.2026	92.6688	150.995	200.432	-0.129232	0.129232	0.583509	-0.583509	-1.42782	1.42782	-1.1069	1.1069	0.16092	1
92	OG0001482	398.293	549.309	802.195	791.193	1026.24	1035.83	594.223	638.005	864.575	746.237	0.0817197	-0.0817197	-0.0550547	0.0550547	-0.420515	0.420515	0.869471	-0.869471	0.558752	1
93	OG0001487	610.54	540.12	465.711	509.976	293.575	375.405	127.663	124.723	240.348	249.07	-0.660679	0.660679	-1.78132	1.78132	0.169635	-0.169635	-0.259513	0.259513	0.0763356	1
94	OG0001494	325.403	414.315	1024.78	779.04	974.052	987.322	562.826	523.965	978.991	1053.02	1.53042	-1.53042	-0.0760033	0.0760033	0.401686	-0.401686	-0.409251	0.409251	0.27266	1
95	OG0001499	40.4288	44.3453	44.2331	30.4195	87.2755	72.6865	56.7843	50.4617	111.516	77.2304	1.3778	-1.3778	0.679102	-0.679102	0.438974	-0.438974	1.35257	-1.35257	0.00123765	1
96	OG0001502	78.5927	131.883	941.445	1161.49	1759.99	1980.25	404.007	479.43	684.103	824.974	-0.721968	0.721968	-0.40631	0.40631	-0.589058	0.589058	-0.644084	0.644084	1.65105e-05	0.0323606
97	OG0001505	5041.91	10713.2	8516.6	9647.13	141.308	177.061	6327.62	7733.49	2826.92	3597.62	-0.319806	0.319806	-0.577017	0.577017	-0.513732	0.513732	-0.616382	0.616382	3.5526e-05	0.0694177
98	OG0001526	78.3376	57.982	213.74	203.538	243.365	273.289	146.454	145.14	146.841	145.38	0.319836	-0.319836	-0.757682	0.757682	0.0589494	-0.0589494	0.0654103	-0.0654103	0.653095	1
99	OG0001527	56.8007	86.5958	30.3297	70.0478	355.594	341.572	25.3843	28.5626	64.1852	90.8624	-1.7381	1.7381	0.0883459	-0.0883459	-0.25879	0.25879	-0.755783	0.755783	0.0553604	1
100	OG0001529	107.364	106.837	668.549	823.366	349.462	430.17	588.62	670.481	502.399	679.063	-1.00395	1.00395	-1.00153	1.00153	-0.629006	0.629006	-1.44665	1.44665	0.000133357	0.258445
101	OG0001530	399.651	445.24	693.194	538.308	599.543	485.209	678.785	808.536	1310.72	1617.62	1.2123	-1.2123	1.01596	-1.01596	-0.840895	0.840895	-1.01021	1.01021	0.829031	1
102	OG0001535	1723.17	2754.83	1282.13	2016.79	610.864	716.914	1016.95	1617.28	208.489	421.984	-0.899784	0.899784	-0.322708	0.322708	-0.920788	0.920788	-1.36819	1.36819	0.0011576	1
103	OG0001537	71.039	72.0403	139.494	125.613	367.352	358.648	576.011	490.959	391.47	463.492	0.867694	-0.867694	0.198681	-0.198681	1.32105	-1.32105	-1.39607	1.39607	0.576976	1
104	OG0001538	127.708	123.15	1175.65	1152.75	501.219	474.885	989.989	1174.67	928.148	1335.41	0.103307	-0.103307	0.283315	-0.283315	-0.895931	0.895931	-1.88943	1.88943	0.142159	1
105	OG0001550	148.502	141.235	238.569	221.337	336.16	346.681	167.718	175.078	164.854	210.052	0.6049	-0.6049	-0.248749	0.248749	-0.34664	0.34664	-1.9463	1.9463	0.245587	1
106	OG0001555	395.039	487.217	161.449	156.434	174.613	230.985	87.2793	97.3256	153.072	145.113	0.181072	-0.181072	-1.5953	1.5953	-0.62465	0.62465	0.306404	-0.306404	0.212291	1
107	OG0001558	182.307	204.634	1181.02	1034.03	907.255	839.018	986.693	1103.79	978.249	1116.54	1.08752	-1.08752	0.640378	-0.640378	-0.917938	0.917938	-1.08187	1.08187	0.866213	1
108	OG0001559	554.078	623.189	1276.8	1361.49	1246.66	1294.28	777.744	793.723	961.854	1186.29	-0.540902	0.540902	-0.315864	0.315864	-0.171344	0.171344	-1.76059	1.76059	0.0346604	1
109	OG0001560	1116.31	1712.81	934.423	1163.01	515.366	478.434	849.301	1128.97	495.143	880.024	-0.585269	0.585269	0.199578	-0.199578	-0.759198	0.759198	-1.50304	1.50304	0.0365667	1
110	OG0001583	445.815	458.174	787.156	792.714	466.574	96.5958	778.755	885.547	465.22	647.991	-0.0109695	0.0109695	2.04841	-2.04841	-0.200072	0.200072	-0.511926	0.511926	0.451135	1
111	OG0001586	282.233	330.635	773.761	807.2	476.798	430.469	648.782	642.447	239.03	275.599	-0.374346	0.374346	0.903773	-0.903773	0.0868214	-0.0868214	-1.25767	1.25767	0.633177	1
112	OG0001594	2004.49	2694	842.3	972.236	123.273	222.564	674.064	689.367	799.597	776.922	-0.45921	0.45921	-1.84113	1.84113	-0.0719798	0.0719798	0.0922386	-0.0922386	0.1161	1
113	OG0001595	1058.37	1620.82	884.502	1099.21	346.244	524.376	691.557	736.707	338.24	568.16	-0.568716	0.568716	-1.07506	1.07506	-0.166103	0.166103	-1.33284	1.33284	0.00528636	1
114	OG0001597	394.547	417.665	863.805	1070.83	353.261	440.791	819.057	957.272	535.877	583.925	-1.26294	1.26294	-1.30094	1.30094	-0.918296	0.918296	-0.506383	0.506383	0.000264551	0.509525
115	OG0001604	82.0106	81.8677	263.187	260.029	81.4199	86.6833	80.8508	68.8677	144.763	116.25	0.0920289	-0.0920289	-0.477399	0.477399	1.22036	-1.22036	1.66559	-1.66559	0.124141	1
116	OG0001608	263.354	318.209	1606.92	1757.8	2158.21	2205.71	1032.93	1148.64	1031.81	1736.81	-0.339112	0.339112	-0.0823191	0.0823191	-0.40113	0.40113	-1.92574	1.92574	0.0593549	1
117	OG0001614	146.849	123.221	1548.95	1645.87	842.714	708.015	1066.14	1233.48	1022.35	1467.16	-0.278637	0.278637	0.797823	-0.797823	-0.668376	0.668376	-1.64114	1.64114	0.256167	1
118	OG0001619	36.177	4.53952	141.704	43.1064	21.9249	181.12	36.2633	57.4426	78.0381	47.8364	0.891448	-0.891448	-1.31007	1.31007	-0.37766	0.37766	0.400914	-0.400914	0.781092	1
119	OG0001620	143.793	187.389	265.24	269.934	308.509	355.127	116.455	102.719	279.598	364.519	-0.0890578	0.0890578	-0.713251	0.713251	0.636346	-0.636346	-1.33864	1.33864	0.255317	1
120	OG0001621	426.9	266.938	195.414	186.157	219.601	244.762	137.388	111.183	288.831	211.656	0.170068	-0.170068	-0.379846	0.379846	0.739045	-0.739045	1.08098	-1.08098	0.126903	1
121	OG0001627	339.494	409.216	736.796	709.343	567.612	462.951	389.997	454.358	423.668	662.496	0.148537	-0.148537	0.794618	-0.794618	-0.59642	0.59642	-1.72043	1.72043	0.402972	1
122	OG0001631	178.226	325.63	70.141	99.9459	82.5476	61.7138	33.0491	37.344	259.507	342.607	-0.929548	0.929548	0.766078	-0.766078	-0.323656	0.323656	-0.732116	0.732116	0.298287	1
123	OG0001634	153.923	209.518	376.139	285.23	154.173	132.706	79.9433	79.5522	133.219	99.6814	1.113	-1.113	0.605914	-0.605914	0.0198577	-0.0198577	1.16599	-1.16599	0.00851658	1
124	OG0001640	56.1195	66.5904	846.368	530.585	432.058	514.318	472.577	387.818	975.938	793.71	1.6424	-1.6424	-0.622491	0.622491	0.705502	-0.705502	0.737461	-0.737461	0.111132	1
125	OG0001642	141.269	148.464	161.607	158.52	71.9045	174.094	117.114	123.243	140.838	152.595	0.0488236	-0.0488236	-2.10332	2.10332	-0.129119	0.129119	-0.202876	0.202876	0.145799	1
126	OG0001646	516.111	635.254	329.375	277.235	455.209	458.941	110.604	118.798	374.599	435.626	1.15176	-1.15176	-0.0546981	0.0546981	-0.478644	0.478644	-1.00929	1.00929	0.773991	1
127	OG0001647	89.5139	110.597	137.282	166.69	97.6263	88.8229	112.251	137.735	135.525	162.483	-1.01029	1.01029	0.493071	-0.493071	-1.06459	1.06459	-0.944663	0.944663	0.0549508	1
128	OG0001649	86.4335	69.2543	487.357	500.588	1012.6	1035.17	383.074	446.634	551.808	787.029	-0.128071	0.128071	-0.105376	0.105376	-0.732539	0.732539	-1.68003	1.68003	0.044473	1
129	OG0001681	159.588	137.621	510.577	369.882	934.738	957.046	296.7	278.856	1145.18	982.65	1.74048	-1.74048	-0.128432	0.128432	0.337683	-0.337683	0.831934	-0.831934	0.0491014	1
130	OG0001690	254.273	270.979	115.954	123.237	135.727	129.22	79.12	68.2329	92.5837	81.2417	-0.583424	0.583424	0.470516	-0.470516	1.41561	-1.41561	1.25017	-1.25017	0.0953274	1
131	OG0001693	325.393	315.216	213.423	172.599	293.047	289.018	153.694	138.574	143.378	144.038	1.88489	-1.88489	0.123357	-0.123357	0.922034	-0.922034	-0.0409619	0.0409619	0.0597043	1
132	OG0001695	113.472	125.803	108.215	90.0349	142.702	117.432	44.6707	52.6811	130.912	134.418	1.17417	-1.17417	1.24386	-1.24386	-1.05359	1.05359	-0.169152	0.169152	0.475876	1
133	OG0001702	513.066	991.84	334.907	424.806	208.009	161.391	389.253	427.699	568.665	791.572	-0.627137	0.627137	0.668821	-0.668821	-0.249408	0.249408	-0.868497	0.868497	0.302735	1
134	OG0001703	407.643	516.731	226.536	185.635	123.353	129.036	136.317	135.302	304.531	239.452	1.07134	-1.07134	-0.243092	0.243092	0.0403423	-0.0403423	1.2916	-1.2916	0.0895109	1
135	OG0001708	83.6936	150.479	379.774	338.766	740.106	763.046	238.184	223.317	476.31	672.382	0.357008	-0.357008	-0.0954652	0.0954652	0.201512	-0.201512	-1.06775	1.06775	0.52844	1
136	OG0001719	39.7079	19.1725	103.316	64.6578	307.187	232.831	121.481	80.2927	246.118	220.745	1.00034	-1.00034	0.598489	-0.598489	0.887279	-0.887279	0.236228	-0.236228	0.00132796	1
137	OG0001720	38.6496	46.7634	487.038	561.949	522.787	529.218	120.824	155.298	180.781	278.467	-0.553183	0.553183	-0.0473595	0.0473595	-0.967139	0.967139	-1.6477	1.6477	0.0152342	1
138	OG0001725	73.6933	108.606	94.9431	125.495	97.8927	85.906	178.103	205.228	136.684	183.865	-0.99787	0.99787	0.469546	-0.469546	-0.509458	0.509458	-1.05972	1.05972	0.0806697	1
139	OG0001726	54.8122	53.6225	186.883	147.919	57.2215	100.903	64.1202	48.2391	148.455	113.313	0.690109	-0.690109	-1.63809	1.63809	0.838135	-0.838135	0.796059	-0.796059	0.701846	1
140	OG0001731	1074.56	1302.37	3162.51	3141.03	5028.03	4954.14	1987.4	2145.16	2980.92	3204.24	0.0659529	-0.0659529	0.143268	-0.143268	-0.738865	0.738865	-0.698817	0.698817	0.118285	1
141	OG0001743	316.171	391.608	877.236	1272.86	155.355	208.287	835.706	996.517	618.768	1043.04	-1.04585	1.04585	-0.827358	0.827358	-0.498867	0.498867	-1.45114	1.45114	0.000508438	0.974167
142	OG0001768	235.187	267.736	402.311	358.643	436.897	511.22	162.695	183.862	265.976	284.079	0.896445	-0.896445	-1.22456	1.22456	-0.954142	0.954142	-0.514111	0.514111	0.226883	1
143	OG0001771	64.9759	79.1737	219.27	209.971	523.1	362.935	212.734	201.088	158.385	183.331	0.207658	-0.207658	1.73288	-1.73288	0.269775	-0.269775	-0.69982	0.69982	0.32937	1
144	OG0001772	320.373	347.829	458.131	568.211	388.413	358.159	200.305	232.26	199.845	330.972	-0.797881	0.797881	0.301459	-0.301459	-0.549553	0.549553	-1.83768	1.83768	0.0598687	1
145	OG0001778	563.443	669.579	515.471	671.451	731.732	737.563	464.664	493.606	573.326	725.2	-1.40647	1.40647	-0.0424777	0.0424777	-0.323231	0.323231	-1.25174	1.25174	0.0193283	1
146	OG0001780	76.7127	58.0314	830.318	683.794	347.607	412.484	398.566	442.72	628.463	750.684	0.952189	-0.952189	-0.839845	0.839845	-0.516408	0.516408	-0.871979	0.871979	0.335821	1
147	OG0001783	508.119	556.753	233.377	257.875	141.404	119.266	168.789	196.131	208.484	228.22	-0.758709	0.758709	1.29204	-1.29204	-1.13995	1.13995	-0.687549	0.687549	0.435409	1
148	OG0001795	52.9872	50.4075	341.226	333.379	305.384	389.976	201.838	221.519	147.995	252.01	0.0844733	-0.0844733	-0.883408	0.883408	-0.337592	0.337592	-1.8883	1.8883	0.0459517	1
149	OG0001802	80.5796	100.892	313.423	388.129	804.027	738.319	356.206	435.844	259.652	314.969	-1.06417	1.06417	0.425744	-0.425744	-1.00481	1.00481	-0.962026	0.962026	0.0428372	1
150	OG0001804	407.283	771.089	616.239	878.462	286.488	223.325	556.973	726.76	114.289	258.696	-0.669667	0.669667	0.472928	-0.472928	-0.504863	0.504863	-1.47788	1.47788	0.102609	1
151	OG0001805	226.463	225.337	617.843	597.753	267.672	224.89	507.357	494.028	877.576	1068.07	0.264361	-0.264361	1.38935	-1.38935	0.212926	-0.212926	-1.56617	1.56617	0.867631	1
152	OG0001814	151.263	165.314	248.021	229.783	221.655	277.549	91.3193	95.8445	201.327	256.82	0.458272	-0.458272	-1.34426	1.34426	-0.290276	0.290276	-1.45421	1.45421	0.0870569	1
153	OG0001815	79.454	85.6748	248.98	277.982	151.677	336.403	270.492	299.168	242.657	248.803	-0.301064	0.301064	-2.07036	2.07036	-0.275372	0.275372	-0.0684048	0.0684048	0.0854538	1
154	OG0001816	307.052	384.327	459.389	526.137	163.748	167.873	362.963	423.362	232.96	409.683	-0.457194	0.457194	-0.0839807	0.0839807	-0.518501	0.518501	-1.8563	1.8563	0.0376149	1
155	OG0001818	961.914	848.706	340.751	338.072	408.545	402.08	257.553	201.948	241.828	226.613	0.0596639	-0.0596639	0.120579	-0.120579	1.82953	-1.82953	0.491046	-0.491046	0.0758439	1
156	OG0001830	149.94	160.737	165.556	230.652	233.544	197.155	169.531	196.024	189.326	228.762	-1.56667	1.56667	0.805656	-0.805656	-0.691084	0.691084	-0.899461	0.899461	0.147846	1
157	OG0001837	77.6489	233.337	1345.79	1834.45	90.268	87.5457	624.47	916.331	433.596	1384.05	-0.426606	0.426606	0.0425056	-0.0425056	-0.525909	0.525909	-1.45179	1.45179	0.0370183	1
158	OG0001842	298.979	303.692	1014.36	979.976	143.6	147.62	635.597	715.863	994.406	1068.17	0.49971	-0.49971	-0.400169	0.400169	-1.72164	1.72164	-1.03669	1.03669	0.0938937	1
159	OG0001844	3064.54	5384.84	2002.49	2978.68	1482.27	1578.2	1297.57	1726.03	336.857	561.476	-0.935694	0.935694	-0.149661	0.149661	-0.676578	0.676578	-1.19382	1.19382	0.00337451	1
160	OG0001853	245.299	262.639	256.079	266.635	537.946	551.343	191.867	188.408	462.223	336.993	-0.263859	0.263859	-0.160693	0.160693	0.118858	-0.118858	2.04731	-2.04731	0.30035	1
161	OG0001920	184.184	234.667	55.7652	60.4897	95.4253	90.3143	56.9483	56.9137	45.2529	60.3994	-0.445243	0.445243	0.301478	-0.301478	0.00332918	-0.00332918	-1.5707	1.5707	0.191182	1
162	OG0001923	187.238	204.902	545.961	503.197	823.316	886.853	155.108	148.631	629.384	570.83	0.972465	-0.972465	-0.886397	0.886397	0.508741	-0.508741	1.16398	-1.16398	0.227776	1
163	OG0001930	170.66	184.267	141.704	157.823	199.143	193.568	142.828	155.719	114.748	147.788	-0.765008	0.765008	0.201787	-0.201787	-0.613804	0.613804	-1.78894	1.78894	0.0425533	1
164	OG0001931	897.254	989.915	316.581	436.975	472.867	482.062	267.195	306.891	124.907	180.121	-1.3235	1.3235	-0.0797672	0.0797672	-0.572796	0.572796	-1.49949	1.49949	0.00994136	1
165	OG0001935	556.998	778.817	400.941	510.325	233.412	225.374	398.237	451.501	175.242	336.728	-0.667071	0.667071	0.0973712	-0.0973712	-0.348344	0.348344	-1.75289	1.75289	0.0536315	1
166	OG0001943	235.613	217.759	103.63	111.764	94.2459	108.258	108.544	111.183	124.907	130.414	-0.875351	0.875351	-1.60401	1.60401	-0.278425	0.278425	-0.500003	0.500003	0.0074206	1
167	OG0001945	67.4806	82.2847	869.811	916.533	1344.33	1349.39	860.842	968.271	1210.05	1402.49	-0.399022	0.399022	-0.0286603	0.0286603	-0.896029	0.896029	-1.12379	1.12379	0.0126314	1
168	OG0001947	240.968	288.898	232.855	325.036	153.268	191.382	427.578	482.178	180.088	235.176	-1.33519	1.33519	-0.89364	0.89364	-0.484984	0.484984	-1.07198	1.07198	0.000291452	0.560754
169	OG0001948	275.703	302.288	150.55	168.08	73.8521	76.8861	111.428	101.344	113.363	103.957	-1.18701	1.18701	-0.434271	0.434271	1.02253	-1.02253	0.933821	-0.933821	0.833346	1
170	OG0001951	255.811	319.131	153.868	209.796	200.927	212.748	106.812	126.733	96.5087	130.682	-1.26512	1.26512	-0.235058	0.235058	-0.701698	0.701698	-1.23735	1.23735	0.00256049	1
171	OG0001955	589.929	1304.24	2099.43	1482	4434.11	3450.26	203.078	417.862	5260.15	5436.53	0.659586	-0.659586	0.477419	-0.477419	-1.3234	1.3234	-0.0630893	0.0630893	0.850244	1
172	OG0001956	71.2238	78.9041	77.8818	69.3508	83.7968	70.058	27.9393	30.1494	131.603	99.1469	0.65532	-0.65532	1.00995	-1.00995	-0.430326	0.430326	1.59079	-1.59079	0.0570691	1
173	OG0001962	223.647	313.296	454.88	461.235	784.298	815.298	357.853	417.225	423.438	630.959	-0.0544955	0.0544955	-0.152261	0.152261	-0.601818	0.601818	-1.54629	1.54629	0.0502234	1
174	OG0001967	88.8877	76.8611	108.685	135.926	86.4893	88.0401	80.2747	85.2637	128.832	163.02	-1.3129	1.3129	-0.104761	0.104761	-0.355312	0.355312	-1.38105	1.38105	0.0142721	1
175	OG0001969	73.6811	42.5854	403.788	355.626	448.971	417.437	261.09	239.603	492.247	729.307	0.394361	-0.394361	0.226322	-0.226322	0.266851	-0.266851	-1.20674	1.20674	0.774972	1
176	OG0001970	352.92	399.211	279.101	324.9	645.943	597.472	395.848	461.128	240.808	387.507	-0.602087	0.602087	0.309534	-0.309534	-0.604851	0.604851	-1.85392	1.85392	0.0711317	1
177	OG0001976	1075.01	1226.61	422.896	403.771	317.884	367.679	365.6	377.555	727.047	656.617	0.430461	-0.430461	-1.35141	1.35141	-0.29929	0.29929	0.94707	-0.94707	0.852707	1
178	OG0001982	337.276	421.679	176.142	222.832	144.244	269.586	294.311	327.308	142.685	242.391	-0.573053	0.573053	-1.48319	1.48319	-0.259936	0.259936	-1.26793	1.26793	0.00453253	1
179	OG0001983	116.346	156.029	136.129	196.674	253.224	253.318	164.59	207.305	128.985	177.436	-1.26878	1.26878	-0.00129009	0.00129009	-0.801039	0.801039	-1.10275	1.10275	0.00720167	1
180	OG0001984	826.534	981.354	1043.2	1219.14	594.045	499.192	536.038	606.727	732.129	1115.2	-0.63387	0.63387	0.707176	-0.707176	-0.504186	0.504186	-1.69018	1.69018	0.177228	1
181	OG0001988	39.5613	45.673	270.612	237.954	1231.42	1323.59	331.15	297.474	595.676	602.097	1.17393	-1.17393	-0.659433	0.659433	0.97934	-0.97934	-0.0980086	0.0980086	0.302177	1
182	OG0001989	85.0513	88.2452	149.132	125.495	173.147	169.9	57.3637	51.8369	136.913	128.811	1.71542	-1.71542	0.188608	-0.188608	1.00872	-1.00872	0.607717	-0.607717	0.00864868	1
183	OG0001993	80.74	85.2777	161.612	166.863	63.1444	92.1985	64.6155	62.3088	438.445	578.048	-0.144383	0.144383	-1.68907	1.68907	0.164124	-0.164124	-1.24029	1.24029	0.0579806	1
184	OG0001995	63.887	70.3827	325.426	393.17	62.1124	207.817	440.189	503.02	437.752	516.844	-0.356942	0.356942	-2.04378	2.04378	-0.252216	0.252216	-0.313705	0.313705	0.0523191	1
185	OG0001996	676.286	847.949	525.108	484.948	190.814	170.859	250.877	284.569	440.987	510.163	0.517552	-0.517552	0.718214	-0.718214	-0.819074	0.819074	-0.946708	0.946708	0.682319	1
186	OG0001998	225.717	245.545	100.788	82.7364	171.644	221.875	66.5103	61.5694	100.203	119.992	1.08033	-1.08033	-1.40196	1.40196	0.423697	-0.423697	-0.987072	0.987072	0.611292	1
187	OG0002000	330.176	312.106	404.732	431.413	157.121	190.805	358.429	342.329	431.29	506.157	-0.503293	0.503293	-1.527	1.527	0.362379	-0.362379	-1.25966	1.25966	0.0505124	1
188	OG0002001	66.4619	99.0931	640.7	531.161	743.632	826.548	263.752	285.897	423.438	464.729	0.852044	-0.852044	-0.481348	0.481348	-0.367243	0.367243	-0.423774	0.423774	0.658631	1
189	OG0002002	146.286	155.819	181.357	189.633	260.813	257.647	128.076	149.794	170.624	237.047	-0.255942	0.255942	0.0700635	-0.0700635	-0.896741	0.896741	-1.86932	1.86932	0.0502798	1
190	OG0002005	266.662	452.551	156.711	189.809	541.517	525.947	135.493	167.992	199.41	321.77	-0.536318	0.536318	0.0819023	-0.0819023	-0.601292	0.601292	-1.31828	1.31828	0.0262914	1
191	OG0002007	61.2754	42.9825	283.883	267.329	256.739	264.129	239.833	250.608	271.284	284.61	0.350985	-0.350985	-0.165802	0.165802	-0.256786	0.256786	-0.28017	0.28017	0.434022	1
192	OG0002009	150.644	205.564	148.656	143.049	198.359	196.858	73.5165	73.8386	303.146	372.533	0.218891	-0.218891	0.0432311	-0.0432311	-0.0248919	0.0248919	-1.16936	1.16936	0.33761	1
193	OG0002014	258.546	234.721	157.659	167.385	133.613	149.386	79.0376	74.4755	82.8889	74.288	-0.628091	0.628091	-1.16994	1.16994	0.623842	-0.623842	1.1487	-1.1487	0.987178	1
194	OG0002016	232.882	335.411	611.206	873.599	737.634	622.398	350.93	421.775	229.497	447.361	-0.876397	0.876397	0.420203	-0.420203	-0.454686	0.454686	-1.59627	1.59627	0.0799302	1
195	OG0002021	597.169	762.623	77.5658	132.1	154.589	146.867	117.938	139.216	185.86	200.699	-1.82471	1.82471	0.179704	-0.179704	-0.580485	0.580485	-0.269303	0.269303	0.0859014	1
196	OG0002025	1608.06	1884.22	861.278	1015.78	200.656	209.375	430.429	554.135	237.675	388.779	-0.590455	0.590455	-0.152542	0.152542	-0.901318	0.901318	-1.7303	1.7303	0.0116126	1
197	OG0002027	334.214	379.246	438.539	371.099	146.277	182.867	295.465	311.438	326.234	397.122	0.9643	-0.9643	-1.28697	1.28697	-0.3047	0.3047	-1.1345	1.1345	0.272443	1
198	OG0002030	359.322	428.891	330.639	426.369	235.179	269.009	201.426	225.011	186.784	247.736	-1.18763	1.18763	-0.630157	0.630157	-0.519428	0.519428	-1.3174	1.3174	0.000630063	1
199	OG0002031	91.9239	90.2758	163.504	142.355	214.201	229.019	71.7841	73.4165	181.704	220.475	1.18197	-1.18197	-0.571492	0.571492	-0.192178	0.192178	-1.64788	1.64788	0.485046	1
200	OG0002041	163.51	172.054	89.4124	125.669	109.291	132.5	140.04	144.624	87.502	129.345	-1.29908	1.29908	-0.739713	0.739713	-0.124105	0.124105	-1.48705	1.48705	0.00566408	1
201	OG0002042	861.308	1383.67	1686.54	1962.21	797.168	664.586	988.093	1267.23	745.977	1336.75	-0.395932	0.395932	0.475326	-0.475326	-0.648614	0.648614	-1.48651	1.48651	0.121961	1
202	OG0002047	93.1624	125.377	210.897	193.805	239.061	251.431	156.673	178.887	147.534	195.354	0.409009	-0.409009	-0.244234	0.244234	-0.641087	0.641087	-1.35063	1.35063	0.130003	1
203	OG0002049	177.774	312.572	117.532	126.19	90.5603	103.971	150.575	152.546	153.306	128.274	-0.251861	0.251861	-0.488726	0.488726	-0.0460825	0.0460825	0.630248	-0.630248	0.825944	1
204	OG0002052	143.656	190.33	154.813	184.419	448.666	464.536	84.5603	89.4973	211.255	227.688	-1.07509	1.07509	-0.214076	0.214076	-0.3494	0.3494	-0.461177	0.461177	0.00795815	1
205	OG0002058	238.435	273.823	83.858	67.6996	369.762	358.472	152.06	143.554	198.515	196.904	1.7233	-1.7233	0.250591	-0.250591	0.465091	-0.465091	0.0658329	-0.0658329	0.0560125	1
206	OG0002060	516.903	575.118	1247.22	1182.47	2628.86	2648.34	1307.13	1400.63	1678.97	1828.2	0.697493	-0.697493	-0.0966016	0.0966016	-0.903805	0.903805	-1.11372	1.11372	0.271288	1
207	OG0002065	676.052	721.396	964.748	1254.19	3976.52	3602.18	867.106	1151.81	663.093	1057.48	-0.907681	0.907681	0.34371	-0.34371	-0.981287	0.981287	-1.59502	1.59502	0.0341537	1
208	OG0002072	36.8764	67.6318	987.936	1005.12	781.641	839.276	507.686	593.575	919.37	1017.13	-0.0588623	0.0588623	-0.242716	0.242716	-0.53238	0.53238	-0.344603	0.344603	0.0055955	1
209	OG0002078	165.238	134.551	493.197	412.813	97.722	106.929	209.814	243.526	341.934	428.387	0.959214	-0.959214	-0.486369	0.486369	-0.803971	0.803971	-1.21335	1.21335	0.291737	1
210	OG0002088	235.065	349.737	247.073	243.167	556.335	601.746	149.092	159.104	342.629	298.242	0.0788953	-0.0788953	-0.388242	0.388242	-0.321664	0.321664	0.685742	-0.685742	0.940013	1
211	OG0002091	363.63	485.717	130.33	223.701	156.666	80.3166	304.043	371.886	189.346	209.521	-1.23073	1.23073	1.50342	-1.50342	-0.468382	0.468382	-0.236027	0.236027	0.800421	1
212	OG0002092	124.828	131.04	100.155	86.5603	115.928	96.9886	45.1635	40.8329	130.915	148.052	1.08906	-1.08906	1.33052	-1.33052	0.753252	-0.753252	-0.918901	0.918901	0.167848	1
213	OG0002093	368.7	382.809	355.544	353.086	267.892	303.065	274.27	315.246	453.563	517.942	0.0635929	-0.0635929	-1.12967	1.12967	-1.27459	1.27459	-1.21519	1.21519	0.00760589	1
214	OG0002096	343.48	264.87	537.147	508.446	203.211	192.925	356.131	435.946	397.916	408.825	0.345151	-0.345151	0.326488	-0.326488	-1.26705	1.26705	-0.170028	0.170028	0.50081	1
215	OG0002098	2331.46	2570.81	4775.51	4015.82	2898.64	3171.3	3968.17	3706.13	4938.93	3117.92	0.72392	-0.72392	-0.37632	0.37632	0.286048	-0.286048	1.89346	-1.89346	0.110507	1
216	OG0002101	509.586	486.922	91.7836	97.6846	104.917	100.046	70.3838	75.8496	370.568	334.053	-0.843516	0.843516	0.64375	-0.64375	-1.01231	1.01231	1.40353	-1.40353	0.911709	1
217	OG0002103	621.108	740.446	459.55	523.36	437.759	441.818	189.083	190.725	165.542	206.578	-0.887146	0.887146	-0.0630708	0.0630708	-0.0590977	0.0590977	-1.50695	1.50695	0.0446152	1
218	OG0002104	219.266	264.088	190.836	171.728	138.654	140.789	103.597	112.452	179.395	176.917	0.974403	-0.974403	-0.141234	0.141234	-0.75783	0.75783	0.128598	-0.128598	0.847615	1
219	OG0002105	945.049	903.355	329.536	478.514	390.073	447.369	523.676	502.596	727.509	293.967	-0.834319	0.834319	-0.309613	0.309613	0.0929481	-0.0929481	1.92067	-1.92067	0.62587	1
220	OG0002110	301.98	318.807	427.96	464.612	1052.68	1026.44	502.084	555.491	377.945	621.603	-0.34285	0.34285	0.105392	-0.105392	-0.421633	0.421633	-2.03528	2.03528	0.0882577	1
221	OG0002111	115.122	110.591	297.611	277.236	525.828	445.265	171.263	182.379	339.397	382.394	0.65745	-0.65745	1.53887	-1.53887	-0.58306	0.58306	-1.105	1.105	0.774079	1
222	OG0002116	136.36	189.691	178.673	182.686	393.73	331.569	195.988	214.432	178.931	225.55	-0.105849	0.105849	0.816946	-0.816946	-0.428383	0.428383	-1.09863	1.09863	0.496056	1
223	OG0002120	417.73	381.175	284.117	369.305	292.646	329.336	146.538	185.127	180.552	287.82	-0.929344	0.929344	-0.420494	0.420494	-0.829371	0.829371	-1.63256	1.63256	0.00174326	1
224	OG0002124	25.436	41.8989	134.121	124.278	220.527	194.164	120.905	107.48	244.735	249.872	0.307982	-0.307982	0.51402	-0.51402	0.475293	-0.475293	-0.0839714	0.0839714	0.0200711	1
225	OG0002130	471.454	538.836	186.569	242.126	67.0938	80.5446	106.648	116.999	155.612	168.101	-1.50937	1.50937	-1.06109	1.06109	-0.539039	0.539039	-0.449325	0.449325	0.00222031	1
226	OG0002131	77.6993	54.5176	125.115	97.1649	107.033	120.162	73.5989	54.3748	75.039	82.0434	0.977616	-0.977616	-0.449276	0.449276	1.16792	-1.16792	-0.346683	0.346683	0.306393	1
227	OG0002133	32.53	39.3537	154.659	199.195	91.644	115.125	163.186	186.82	240.355	300.113	-1.14331	1.14331	-1.03159	1.03159	-0.613395	0.613395	-1.0044	1.0044	2.46714e-05	0.0483066
228	OG0002139	142.034	258.525	343.436	433.325	314.85	294.926	156.015	165.876	169.467	203.371	-0.746139	0.746139	0.210673	-0.210673	-0.197524	0.197524	-0.586319	0.586319	0.071937	1
229	OG0002140	202.953	299.653	188.624	220.223	190.592	207.6	204.063	205.015	100.667	106.63	-0.767388	0.767388	-0.424106	0.424106	-0.0231126	0.0231126	-0.285602	0.285602	0.0140991	1
230	OG0002142	49.5922	56.9204	390.671	488.77	814.484	779.622	277.251	408.341	334.082	869.871	-0.471128	0.471128	0.0923649	-0.0923649	-0.807579	0.807579	-1.8796	1.8796	0.0399754	1
231	OG0002143	850.451	1004.04	674.772	773.403	108.259	44.8303	390.489	293.455	651.318	701.247	-0.319365	0.319365	1.94284	-1.94284	0.665278	-0.665278	-0.173096	0.173096	0.199471	1
232	OG0002146	160.415	102.637	153.078	162.692	349.653	710.992	300.326	319.161	595.676	610.114	-0.158373	0.158373	-1.77216	1.77216	-0.158154	0.158154	-0.0622893	0.0622893	0.114515	1
233	OG0002149	35.9509	118.764	286.254	346.935	167.353	177.866	141.651	167.22	213.794	264.567	-0.362369	0.362369	-0.115145	0.115145	-0.313021	0.313021	-0.401337	0.401337	0.000567953	1
234	OG0002158	71.8255	166.222	185.938	231.001	481.847	428.299	168.954	206.497	144.763	329.51	-0.396641	0.396641	0.215911	-0.215911	-0.366966	0.366966	-1.42955	1.42955	0.0870683	1
235	OG0002159	371.124	465.801	167.613	186.159	275.012	278.211	158.489	192.531	163.467	206.316	-0.567398	0.567398	-0.0625773	0.0625773	-1.04969	1.04969	-1.25423	1.25423	0.00798337	1
236	OG0002161	239.928	268.088	364.449	407.425	388.18	487.643	243.937	295.675	270.822	198.826	-0.519127	0.519127	-1.05886	1.05886	-0.893973	0.893973	1.42934	-1.42934	0.544848	1
237	OG0002171	193.223	237.844	154.342	168.082	871.532	1170.99	201.756	246.696	223.265	302.783	-0.34946	0.34946	-1.20227	1.20227	-0.821784	0.821784	-1.23958	1.23958	0.00083892	1
238	OG0002172	29.6343	45.4858	69.0367	79.6094	166.3	192.969	80.1914	100.921	74.3463	102.891	-0.491771	0.491771	-0.51323	0.51323	-0.791366	0.791366	-1.11352	1.11352	0.000403239	0.774218
239	OG0002173	266.686	274.975	449.226	416.472	579.346	636.301	59.2584	74.686	637.463	576.172	0.572171	-0.572171	-0.708509	0.708509	-1.74179	1.74179	0.763716	-0.763716	0.52712	1
240	OG0002174	579.707	719.442	538.853	545.784	136.515	152.196	228.296	231.462	377.033	408.878	-0.106334	0.106334	-0.903826	0.903826	-0.114604	0.114604	-0.674328	0.674328	0.0196188	1
241	OG0002180	50.6032	60.5997	244.343	228.914	268.807	264.219	178.599	180.792	174.314	221.277	0.452615	-0.452615	0.119496	-0.119496	-0.0847243	0.0847243	-1.6481	1.6481	0.412386	1
242	OG0002184	2342.38	2283.14	1285.6	1035.77	819.571	841.287	644.498	679.577	949.156	832.193	1.75458	-1.75458	-0.21316	0.21316	-0.431911	0.431911	1.07045	-1.07045	0.190185	1
243	OG0002185	46.4232	50.7144	188.15	150.008	228.17	311.288	97.6638	102.3	193.017	225.817	1.12687	-1.12687	-1.53934	1.53934	-0.231623	0.231623	-0.782391	0.782391	0.404446	1
244	OG0002191	179.753	234.132	411.999	365.552	433.033	260.627	305.716	317.423	356.941	345.814	0.439286	-0.439286	1.82779	-1.82779	-0.138162	0.138162	0.116438	-0.116438	0.120123	1
245	OG0002194	169.768	152.124	124.958	147.57	212.737	205.345	83.1576	92.142	134.373	177.179	-0.988459	0.988459	0.210619	-0.210619	-0.61059	0.61059	-1.63687	1.63687	0.0322973	1
246	OG0002195	95.7022	89.2337	209.791	191.547	102.649	88.5867	182.388	195.602	310.767	266.441	0.766763	-0.766763	1.24033	-1.24033	-0.589662	0.589662	1.29533	-1.29533	0.0715678	1
247	OG0002197	58.4027	76.0378	357.496	407.595	331.059	340.031	86.2111	100.712	162.305	222.343	-0.608829	0.608829	-0.124306	0.124306	-0.721287	0.721287	-1.45125	1.45125	0.00953757	1
248	OG0002199	866.648	977.915	308.684	353.889	179.949	276.574	228.541	279.067	401.504	476.493	-0.545895	0.545895	-1.69346	1.69346	-0.796406	0.796406	-0.683369	0.683369	0.00230165	1
249	OG0002202	137.307	234.356	306.472	214.315	234.45	144.14	24.8898	47.7102	711.347	579.911	0.728431	-0.728431	0.981945	-0.981945	-1.29392	1.29392	0.419011	-0.419011	0.586382	1
250	OG0002205	661.369	758.686	586.559	579.502	803.414	770.223	326.617	349.523	394.344	457.519	0.118047	-0.118047	0.411442	-0.411442	-0.660854	0.660854	-1.44668	1.44668	0.229745	1
251	OG0002219	70.6618	195.613	469.965	451.171	360.004	335.92	344.996	393.742	428.092	473.874	0.0904977	-0.0904977	0.153496	-0.153496	-0.292669	0.292669	-0.22513	0.22513	0.418886	1
252	OG0002223	177.096	197.917	161.133	186.506	116.543	90.5835	54.5598	68.3366	130.91	158.739	-0.722555	0.722555	1.24077	-1.24077	-1.10977	1.10977	-0.951159	0.951159	0.357965	1
253	OG0002234	94.2452	100.239	141.231	187.375	127.357	163.352	75.5233	78.7831	329.711	347.455	-1.54585	1.54585	-1.36307	1.36307	-0.232559	0.232559	-0.288461	0.288461	0.0128876	1
254	OG0002238	74.883	92.3333	220.377	226.136	568.76	605.179	342.688	346.666	124.445	128.813	-0.246212	0.246212	-0.592181	0.592181	-0.110151	0.110151	-0.329229	0.329229	0.00432697	1
255	OG0002239	316.458	221.174	126.064	117.847	93.7777	94.3161	136.893	135.513	146.377	103.425	0.286675	-0.286675	-0.0243581	0.0243581	0.0431263	-0.0431263	1.46316	-1.46316	0.121464	1
256	OG0002246	92.0919	81.0511	134.909	120.279	260.065	296.885	85.054	91.9304	199.48	253.348	0.73493	-0.73493	-0.847451	0.847451	-0.498056	0.498056	-1.52495	1.52495	0.162006	1
257	OG0002248	107.883	108.801	102.685	101.161	111.021	91.9128	81.7573	104.835	63.4926	102.089	0.0566001	-0.0566001	0.712596	-0.712596	-0.936005	0.936005	-1.76405	1.76405	0.257119	1
258	OG0002254	255.097	278.59	387.984	276.546	977.026	1056.7	315.49	303.081	594.976	619.192	1.97647	-1.97647	-0.461747	0.461747	0.236441	-0.236441	-0.235075	0.235075	0.36901	1
259	OG0002256	143.575	174.822	292.57	240.201	486.735	605.616	133.432	131.071	246.582	270.711	1.14107	-1.14107	-1.26337	1.26337	0.103624	-0.103624	-0.541485	0.541485	0.711282	1
260	OG0002260	180.595	182.571	289.412	318.951	600.803	654.346	227.388	242.675	296.455	253.878	-0.97107	0.97107	-0.853171	0.853171	-0.650454	0.650454	1.54732	-1.54732	0.60253	1
261	OG0002262	239.879	1466.07	710.25	682.219	1216.29	1216.95	29.67	90.0252	270.192	757.303	0.042788	-0.042788	-0.000577596	0.000577596	-1.07178	1.07178	-1.00766	1.00766	0.0571443	1
262	OG0002263	145.212	337.035	377.005	475.771	289.413	291.688	366.141	463.626	288.374	329.51	-0.563813	0.563813	-0.0190589	0.0190589	-0.571933	0.571933	-0.324098	0.324098	0.00700559	1
263	OG0002267	322.399	391.831	440.588	448.096	340.324	347.362	235.714	274.096	397.572	537.154	-0.0924291	0.0924291	-0.111976	0.111976	-0.823701	0.823701	-1.63378	1.63378	0.0417997	1
264	OG0002270	230.398	271.428	1226.28	1432.1	85.7521	112.287	67.6641	79.1301	95.5852	113.044	-0.785344	0.785344	-1.35911	1.35911	-0.7923	0.7923	-0.84882	0.84882	6.98169e-05	0.136003
265	OG0002275	241.073	266.428	613.103	579.502	818.099	850.312	483.053	582.043	428.979	381.619	0.47678	-0.47678	-0.326728	0.326728	-1.57277	1.57277	0.988699	-0.988699	0.79259	1
266	OG0002278	57.3795	58.5503	133.175	152.263	264.568	208.916	69.3948	75.0044	128.832	147.518	-0.906861	0.906861	1.59391	-1.59391	-0.526808	0.526808	-0.916931	0.916931	0.671957	1
267	OG0002284	256.115	307.208	201.259	268.546	343.332	356.978	227.388	260.026	156.769	223.949	-1.19408	1.19408	-0.162458	0.162458	-0.558274	0.558274	-1.47116	1.47116	0.00692659	1
268	OG0002291	99.7509	132.235	130.644	159.567	75.735	93.852	62.307	65.7998	110.592	105.026	-1.02717	1.02717	-1.10105	1.10105	-0.281009	0.281009	0.266067	-0.266067	0.0586247	1
269	OG0002306	42.0354	47.7934	100.629	113.672	70.1561	124.76	45.4108	49.9317	63.9543	99.4142	-0.350562	0.350562	-1.61349	1.61349	-0.273108	0.273108	-1.25015	1.25015	0.00993729	1
270	OG0002313	110.602	129.212	101.264	102.725	343.234	389.951	83.076	83.9963	119.599	134.153	-0.131037	0.131037	-1.16534	1.16534	-0.100745	0.100745	-1.04894	1.04894	0.0236644	1
271	OG0002317	80.1734	104.613	430.797	371.443	1963.02	2179.33	488.593	476.724	627.076	653.675	0.968232	-0.968232	-0.683385	0.683385	0.160912	-0.160912	-0.271794	0.271794	0.867469	1
272	OG0002319	81.4608	106.57	696.988	665.195	917.345	960.064	398.238	381.47	651.318	714.873	0.337489	-0.337489	-0.329028	0.329028	0.310978	-0.310978	-0.672677	0.672677	0.632982	1
273	OG0002323	207.955	146.615	188.78	262.462	284.719	412.432	90.2463	129.695	251.2	201.768	-0.945433	0.945433	-1.0607	1.0607	-1.03851	1.03851	0.631857	-0.631857	0.084086	1
274	OG0002325	16462.3	16360.8	12202.3	10018.6	18954.8	16761	8053.12	10723.6	18975.6	6942.74	0.417607	-0.417607	0.261022	-0.261022	-0.604353	0.604353	1.97283	-1.97283	0.225899	1
275	OG0002327	1063.16	1527.2	948.167	1188.03	51.8004	181.411	360.903	445.365	302.686	696.166	-0.330403	0.330403	-1.63534	1.63534	-0.30825	0.30825	-1.15915	1.15915	0.00981762	1
276	OG0002329	107.951	254.537	670.131	158.52	222.591	329.347	67.0872	28.2453	786.174	378.624	1.40371	-1.40371	-0.439755	0.439755	0.926335	-0.926335	0.795498	-0.795498	0.0520366	1
277	OG0002339	135.784	183.398	153.119	180.185	124.934	152.926	111.181	135.091	105.513	129.877	-0.708367	0.708367	-0.878822	0.878822	-0.846919	0.846919	-0.902906	0.902906	1.66004e-07	0.000326529
278	OG0002341	169.066	245.462	87.5198	98.9013	92.4768	90.545	25.3019	37.1325	59.1058	78.0374	-0.42522	0.42522	0.073512	-0.073512	-1.31975	1.31975	-0.961448	0.961448	0.0225709	1
279	OG0002342	515.556	711.518	259.078	385.348	316.069	238.538	557.962	674.182	234.456	413.352	-1.0123	1.0123	0.722214	-0.722214	-0.487303	0.487303	-1.4267	1.4267	0.145437	1
280	OG0002345	232.598	202.254	9731.27	9217.63	10728.4	10656.6	6773.5	8657.33	10587.1	14791.9	0.262541	-0.262541	0.032513	-0.032513	-1.18244	1.18244	-1.6047	1.6047	0.10128	1
281	OG0002349	610.873	425.103	71.4032	61.0094	329.396	292.707	74.5879	62.7309	187.707	140.302	0.628748	-0.628748	0.472396	-0.472396	0.691632	-0.691632	1.15762	-1.15762	0.000399085	0.766642
282	OG0002350	691.753	718.428	2554.86	2313.59	1845.95	1699.12	1860.18	1868.39	2725.1	2513.95	1.33959	-1.33959	1.11963	-1.11963	-0.0595374	0.0595374	1.08946	-1.08946	0.00790047	1
283	OG0002351	50.8567	51.3583	199.957	235.63	144.391	273.709	294.641	254.206	95.1234	142.71	-0.451802	0.451802	-1.70633	1.70633	0.406433	-0.406433	-1.10381	1.10381	0.0673193	1
284	OG0002353	89.633	79.8087	110.21	127.058	107.199	105.835	89.7493	112.768	92.5837	92.9977	-1.03043	1.03043	0.0928521	-0.0928521	-1.64944	1.64944	-0.0323707	0.0323707	0.0676266	1
285	OG0002356	53.9295	53.7621	474.084	431.583	720.657	736.624	430.049	468.638	620.609	883.765	0.533875	-0.533875	-0.124653	0.124653	-0.488497	0.488497	-1.9901	1.9901	0.220136	1
286	OG0002358	58.2989	57.0109	615.291	762.235	831.489	851.746	483.622	582.466	501.473	607.701	-1.31934	1.31934	-0.148842	0.148842	-1.14674	1.14674	-1.18452	1.18452	0.00249359	1
287	OG0002365	889.612	1350.64	352.601	537.267	1211.47	1274.16	375.484	473.292	172.386	212.516	-1.3261	1.3261	-0.161157	0.161157	-0.736371	0.736371	-0.666254	0.666254	0.00518666	1
288	OG0002366	150.771	181.727	372.979	443.926	277.443	232.493	284.338	357.561	107.593	217.803	-0.473003	0.473003	0.480088	-0.480088	-0.62128	0.62128	-1.84464	1.84464	0.118271	1
289	OG0002367	282.297	319.62	597.303	707.779	541.929	588.567	438.045	493.607	297.605	406.208	-0.896959	0.896959	-0.43714	0.43714	-0.631926	0.631926	-1.63505	1.63505	0.00284715	1
290	OG0002368	31.0653	38.2459	192.256	202.843	107.074	101.35	33.0483	30.2552	76.1911	72.6899	-0.468774	0.468774	0.480446	-0.480446	0.771842	-0.771842	0.411387	-0.411387	0.165334	1
291	OG0002370	62.0925	80.8263	258.605	129.667	454.288	369.58	25.5492	70.2429	244.684	373.338	1.11516	-1.11516	0.345272	-0.345272	-1.56678	1.56678	-0.699048	0.699048	0.645175	1
292	OG0002372	55.2673	77.9948	204.104	227.351	124.965	176.605	86.3702	75.6381	172.007	149.92	-0.430759	0.430759	-1.36898	1.36898	0.529597	-0.529597	0.548494	-0.548494	0.597172	1
293	OG0002376	2294.26	2510.89	919.574	1044.29	1934.87	2184.95	880.869	900.886	944.307	1052.93	-1.18914	1.18914	-1.13663	1.13663	-0.210375	0.210375	-1.01841	1.01841	0.00152829	1
294	OG0002381	300.591	295.784	90.9937	120.628	226.809	214.121	132.772	146.411	257.667	253.883	-1.96114	1.96114	0.403002	-0.403002	-0.684145	0.684145	0.103587	-0.103587	0.20199	1
295	OG0002382	125.078	146.901	151.972	140.266	296.433	322.728	146.207	141.438	364.791	422.505	0.682636	-0.682636	-0.723742	0.723742	0.282559	-0.282559	-1.24926	1.24926	0.453839	1
296	OG0002384	374.631	397.23	293.36	315.476	225.219	305.221	85.1389	85.7947	209.179	214.86	-0.486203	0.486203	-2.01872	2.01872	-0.0513535	0.0513535	-0.179322	0.179322	0.0772705	1
297	OG0002385	58.1782	43.1196	259.711	255.336	154.3	50.3373	90.6583	97.2177	69.2646	76.9658	0.0338015	-0.0338015	2.02134	-2.02134	-0.13891	0.13891	-0.20954	0.20954	0.301632	1
298	OG0002390	294.295	314.403	64.1537	58.7567	227.883	232.878	134.67	150.322	106.402	76.9765	0.521509	-0.521509	-0.128752	0.128752	-0.652296	0.652296	1.90579	-1.90579	0.333024	1
299	OG0002394	33.5517	60.9765	327.641	490.333	327.728	334.511	127.828	183.33	108.284	348.484	-0.641795	0.641795	-0.0330485	0.0330485	-0.575561	0.575561	-1.69686	1.69686	0.0241457	1
300	OG0002402	79.0356	134.395	175.51	226.83	125.813	204.335	120.741	133.292	136.22	154.733	-0.70668	0.70668	-1.3177	1.3177	-0.27373	0.27373	-0.352522	0.352522	0.007614	1
301	OG0002403	182.959	235.624	148.814	168.428	82.7183	81.0088	134.422	146.199	106.437	117.851	-0.844587	0.844587	0.142637	-0.142637	-0.573356	0.573356	-0.695241	0.695241	0.0190108	1
302	OG0002404	275.037	375.039	176.139	139.652	689.232	799.887	53.9005	57.3368	630.539	570.891	1.14334	-1.14334	-0.73533	0.73533	-0.305692	0.305692	0.491288	-0.491288	0.633336	1
303	OG0002411	715.399	658.384	130.17	99.5965	70.3786	138.476	26.2909	33.7473	106.845	184.809	0.612155	-0.612155	-1.5	1.5	-0.571351	0.571351	-1.22978	1.22978	0.0897983	1
304	OG0002413	94.5843	106.573	371.556	334.074	413.76	435.042	141.097	149.374	290.445	250.139	0.974372	-0.974372	-0.459945	0.459945	-0.522734	0.522734	1.3677	-1.3677	0.361553	1
305	OG0002415	344.172	434.928	972.339	976.324	1807.75	1849.6	788.563	917.495	1029.5	1198.31	-0.0273524	0.0273524	-0.15304	0.15304	-1.01073	1.01073	-1.01345	1.01345	0.0267957	1
306	OG0002417	391.693	395.141	620.895	590.952	653.747	718.927	500.599	474.777	570.971	575.108	0.873777	-0.873777	-1.67922	1.67922	0.936183	-0.936183	-0.127651	0.127651	0.998629	1
307	OG0002419	284.457	378.313	463.815	497.811	464.652	438.256	264.885	281.71	370.106	429.998	-0.442598	0.442598	0.366009	-0.366009	-0.385382	0.385382	-0.937169	0.937169	0.115369	1
308	OG0002421	118.857	101.916	383.666	375.47	783.7	850.015	327.183	289.942	481.151	342.337	0.114936	-0.114936	-0.432115	0.432115	0.64241	-0.64241	1.79448	-1.79448	0.16583	1
309	OG0002424	2163.58	2411.79	1311.83	1262.43	158.645	149.919	783.37	830.114	1353.2	792.641	0.150482	-0.150482	0.221741	-0.221741	-0.227162	0.227162	2.04833	-2.04833	0.178897	1
310	OG0002426	120.489	126.751	252.519	265.911	301.168	291.749	128.24	137.312	206.639	235.441	-0.656246	0.656246	0.403604	-0.403604	-0.867871	0.867871	-1.65508	1.65508	0.060025	1
311	OG0002430	50.1526	50.8273	681.821	724.116	1227.93	1208.21	524.5	596.958	591.67	683.341	-0.626996	0.626996	0.168713	-0.168713	-1.34663	1.34663	-1.49853	1.49853	0.0223309	1
312	OG0002432	121.161	141.555	276.703	290.116	161.2	154.983	55.5488	57.1252	168.084	171.57	-0.588603	0.588603	0.489044	-0.489044	-0.348001	0.348001	-0.255225	0.255225	0.326206	1
313	OG0002435	170.321	182.687	142.02	145.66	77.98	91.77	353263	289182	106.437	78.8365	-0.133985	0.133985	-0.860279	0.860279	1.05627	-1.05627	1.57755	-1.57755	0.336161	1
314	OG0002441	32.3467	42.4945	107.107	105.508	84.8159	91.0586	49.0371	47.1791	167.154	120.796	0.0743974	-0.0743974	-0.351105	0.351105	0.19101	-0.19101	1.59245	-1.59245	0.253328	1
315	OG0002443	42.4325	65.3253	67.4554	69.0067	97.5461	98.5569	34.5334	33.3241	140.376	148.851	-0.11187	0.11187	-0.0507248	0.0507248	0.175377	-0.175377	-0.288365	0.288365	0.348133	1
316	OG0002444	314.76	304.281	286.562	270.63	452.359	556.937	240.656	231.674	182.859	145.647	0.383379	-0.383379	-1.38922	1.38922	0.254971	-0.254971	1.51874	-1.51874	0.666154	1
317	OG0002448	51.353	53.9479	87.2023	91.4272	769.196	748.728	55.1368	53.1053	210.793	291.169	-0.303437	0.303437	0.17299	-0.17299	0.240776	-0.240776	-2.05428	2.05428	0.247535	1
318	OG0002450	971.166	1288.73	221.955	290.271	903.766	746.699	211.812	253.467	186.502	358.059	-0.721292	0.721292	0.514674	-0.514674	-0.484181	0.484181	-1.70378	1.70378	0.112388	1
319	OG0002452	238.805	279.527	1425.02	1552.58	986.001	144.291	1219.13	1393.36	781.305	1131.77	-0.117266	0.117266	2.03843	-2.03843	-0.182553	0.182553	-0.501466	0.501466	0.481087	1
320	OG0002454	156.629	185.057	291.148	342.939	177.771	167.431	120.741	110.441	102.278	126.67	-1.03869	1.03869	0.380916	-0.380916	0.566594	-0.566594	-1.35484	1.35484	0.335173	1
321	OG0002459	82.1817	57.0685	91.6256	100.985	967.459	931.095	53.8173	64.9535	121.215	84.9831	-0.376607	0.376607	0.148439	-0.148439	-0.726668	0.726668	1.36181	-1.36181	0.763483	1
322	OG0002460	97.3806	98.7311	424.952	467.561	306.962	277.777	378.911	414.375	457.846	472.749	-1.20421	1.20421	1.25896	-1.25896	-1.12764	1.12764	-0.403946	0.403946	0.396434	1
323	OG0002464	409.126	453.324	762.704	767.921	553.539	809.986	720.733	815.515	463.754	625.566	-0.0286035	0.0286035	-1.57852	1.57852	-0.51782	0.51782	-1.24672	1.24672	0.014452	1
324	OG0002468	33.9381	27.4005	379.458	314.435	134.413	121.752	255.613	277.504	342.398	380.019	1.21018	-1.21018	0.638274	-0.638274	-0.530295	0.530295	-0.67253	0.67253	0.634894	1
325	OG0002469	106.486	195.112	374.875	338.941	579.483	639.677	460.215	493.602	426.899	627.755	0.297534	-0.297534	-0.291813	0.291813	-0.206889	0.206889	-1.12562	1.12562	0.162756	1
326	OG0002471	505.054	652.776	239.174	299.137	469.856	559.797	218.479	291.649	244.733	444.162	-0.629964	0.629964	-0.494006	0.494006	-0.811183	0.811183	-1.63721	1.63721	0.00264114	1
327	OG0002477	68.7192	173.31	83.2513	148.613	98.1824	87.6171	282.688	282.557	190.478	90.5952	-0.950596	0.950596	0.191754	-0.191754	0.000781607	-0.000781607	1.19834	-1.19834	0.735864	1
328	OG0002479	191.78	262.343	301.183	278.891	403.039	412.309	234.145	256.428	217.95	292.366	0.367981	-0.367981	-0.108866	0.108866	-0.434945	0.434945	-1.39634	1.39634	0.186612	1
329	OG0002481	230.004	209.815	238.858	259.158	241.521	206.708	222.195	235.591	242.888	275.794	-0.713598	0.713598	1.35974	-1.35974	-0.512285	0.512285	-1.11069	1.11069	0.55242	1
330	OG0002482	253.671	271.32	159.239	151.566	199.215	183.518	151.729	85.0521	278.903	285.952	0.181922	-0.181922	0.302213	-0.302213	2.07503	-2.07503	-0.0919549	0.0919549	0.127252	1
331	OG0002484	184.489	201.669	159.083	187.546	226.833	238.019	93.2133	106.316	169.006	197.228	-1.24575	1.24575	-0.365089	0.365089	-0.996279	0.996279	-1.16907	1.16907	0.000545974	1
332	OG0002485	615.638	707.873	323.058	349.198	232.388	280.183	349.941	356.082	94.1999	164.889	-0.275601	0.275601	-0.660888	0.660888	-0.0616447	0.0616447	-1.93378	1.93378	0.0482088	1
333	OG0002487	967.119	1349.24	1838.17	2119.25	1517.67	1328.05	894.833	1054.24	841.232	1381.74	-0.470593	0.470593	0.441493	-0.441493	-0.541877	0.541877	-1.61101	1.61101	0.115775	1
334	OG0002489	86.0379	76.2541	216.584	217.27	151.584	200.149	168.706	146.623	397.81	219.409	-0.0100602	0.0100602	-0.878541	0.878541	0.445612	-0.445612	1.83912	-1.83912	0.417899	1
335	OG0002491	644.78	331.563	697.46	712.819	238.223	304.74	697.575	703.064	1610.63	727.166	-0.0452318	0.0452318	-0.50881	0.50881	-0.0162765	0.0162765	1.56955	-1.56955	0.46619	1
336	OG0002495	179.503	214.936	257.187	234.652	279.898	297.538	141.954	158.029	440.985	521.125	0.672121	-0.672121	-0.448146	0.448146	-0.786026	0.786026	-1.2219	1.2219	0.170355	1
337	OG0002497	386.725	420.236	875.085	1072.36	459.011	444.672	433.848	506.659	339.651	494.008	-0.93771	0.93771	0.146884	-0.146884	-0.716642	0.716642	-1.71399	1.71399	0.0247679	1
338	OG0002499	100.939	159.212	423.852	391.779	551.141	643.483	259.481	307.947	175.701	354.099	0.197506	-0.197506	-0.388245	0.388245	-0.429007	0.429007	-1.69128	1.69128	0.0857734	1
339	OG0002509	824.859	1118.5	668.551	664.498	806.184	646.831	569.004	631.339	305.457	472.746	0.022281	-0.022281	0.803777	-0.803777	-0.380603	0.380603	-1.57551	1.57551	0.451416	1
340	OG0002517	40.0516	62.3255	236.803	372.486	267.491	298.206	208.597	286.367	125.369	284.616	-0.900118	0.900118	-0.219466	0.219466	-0.635087	0.635087	-1.57001	1.57001	0.00601916	1
341	OG0002521	454.437	548.275	665.387	493.815	453.068	482.43	127.088	175.916	609.067	513.902	1.23341	-1.23341	-0.261557	0.261557	-1.34289	1.34289	0.706206	-0.706206	0.841485	1
342	OG0002522	80.5277	49.8971	281.197	162.518	302.022	336.17	150.741	146.305	472.846	376.275	1.5019	-1.5019	-0.300457	0.300457	0.0838521	-0.0838521	0.638633	-0.638633	0.13265	1
343	OG0002526	188.458	249.973	346.756	303.66	198.532	227.096	168.131	161.113	418.358	423.849	0.824284	-0.824284	-0.834872	0.834872	0.265156	-0.265156	-0.0811061	0.0811061	0.865572	1
344	OG0002529	171.966	163.24	125.59	114.546	182.233	167.209	54.4774	72.4644	159.078	99.1442	0.348005	-0.348005	0.325339	-0.325339	-1.07221	1.07221	1.75631	-1.75631	0.437678	1
345	OG0002530	1385.65	1678.75	588.3	639.123	475.637	502.964	404.913	488.102	456.973	654.95	-0.38511	0.38511	-0.259718	0.259718	-0.866411	0.866411	-1.65598	1.65598	0.0122224	1
346	OG0002531	191.047	192.72	562.395	521.973	844.773	1101.22	388.182	421.353	603.75	835.408	0.367243	-0.367243	-1.29828	1.29828	-0.403677	0.403677	-1.58581	1.58581	0.0590017	1
347	OG0002533	42.9075	53.1647	303.944	427.066	272.149	235.009	181.234	231.251	126.523	212.725	-1.013	1.013	0.440452	-0.440452	-0.729308	0.729308	-1.52826	1.52826	0.0532707	1
348	OG0002537	304.094	344.471	263.029	276.018	135.106	180.997	135.988	158.681	385.626	377.803	-0.287699	0.287699	-1.73331	1.73331	-0.919462	0.919462	0.122342	-0.122342	0.0488497	1
349	OG0002538	1116.51	1240.11	1142.32	1077.66	319.415	575.466	590.351	808.641	1388.29	1071.64	0.173798	-0.173798	-1.70734	1.70734	-0.93106	0.93106	0.768098	-0.768098	0.320503	1
350	OG0002539	218.288	146.591	281.67	277.758	261.558	307.621	64.0378	59.4526	187.938	179.587	0.0683469	-0.0683469	-0.791022	0.791022	0.362913	-0.362913	0.222093	-0.222093	0.857277	1
351	OG0002545	489.215	535.194	1044.6	1166.94	1037.57	1036.4	489.554	568.925	299.052	417.283	-0.602469	0.602469	0.00611776	-0.00611776	-0.816661	0.816661	-1.79753	1.79753	0.0231001	1
352	OG0002547	151.273	209.711	1518.78	1577.38	209.48	478.777	586.395	555.173	664.481	470.082	-0.0876697	0.0876697	-1.81225	1.81225	0.12668	-0.12668	0.793605	-0.793605	0.555638	1
353	OG0002550	813.898	1057.04	847.126	860.399	1695.33	1699.64	682.41	636.947	889.258	982.188	-0.114879	0.114879	-0.0187802	0.0187802	0.509249	-0.509249	-0.733848	0.733848	0.636854	1
354	OG0002551	81.8823	98.4331	63.822	74.7409	642.594	807.19	135.492	146.412	89.1205	97.2762	-0.950352	0.950352	-1.36921	1.36921	-0.467162	0.467162	-0.527691	0.527691	0.00140002	1
355	OG0002558	230.64	315.767	92.2575	123.062	86.5565	76.8037	47.1423	56.9137	46.8714	92.7331	-0.747029	0.747029	0.311741	-0.311741	-0.49034	0.49034	-1.71538	1.71538	0.0668044	1
356	OG0002559	63.0134	44.72	103	85.6913	74.1806	85.0188	66.6759	66.0114	151.23	170.236	0.91322	-0.91322	-0.677772	0.677772	0.0498586	-0.0498586	-0.588602	0.588602	0.780185	1
357	OG0002562	215.125	191.675	564.603	596.536	253.933	234.347	371.37	481.863	464.763	592.479	-0.303082	0.303082	0.442057	-0.442057	-1.42716	1.42716	-1.33129	1.33129	0.0828341	1
358	OG0002563	237.637	271	677.872	674.581	229.168	136.246	24.5602	27.8232	503.782	511.505	0.0191114	-0.0191114	1.99776	-1.99776	-0.489365	0.489365	-0.0597539	0.0597539	0.385846	1
359	OG0002566	553.234	604.965	795.566	719.6	522.352	511.261	412.414	385.806	898.597	422.243	0.288614	-0.288614	0.0617692	-0.0617692	0.191887	-0.191887	2.07604	-2.07604	0.0998327	1
360	OG0002567	495.738	652.957	394.622	454.009	479.276	430.563	155.356	199.834	127.281	207.933	-0.469285	0.469285	0.359042	-0.359042	-0.839737	0.839737	-1.61347	1.61347	0.068966	1
361	OG0002568	157.303	133.665	428.114	330.078	714.698	613.685	364.611	366.128	414.657	440.945	1.58232	-1.58232	0.930552	-0.930552	-0.0254055	0.0254055	-0.37598	0.37598	0.145898	1
362	OG0002569	164.649	188.579	269.82	250.125	146.799	123.323	210.41	215.805	234.343	251.213	0.657303	-0.657303	1.50806	-1.50806	-0.219672	0.219672	-0.602891	0.602891	0.352809	1
363	OG0002584	312.246	468.204	54.1871	70.571	0.181048	110.966	78.3783	96.6898	289.062	1357.32	-0.228792	0.228792	-1.7365	1.7365	-0.182225	0.182225	-1.13041	1.13041	0.0215031	1
364	OG0002587	441.416	312.106	818.155	517.102	2098.35	2192.63	332.139	307.207	1704.83	1358.12	1.55094	-1.55094	-0.151138	0.151138	0.268252	-0.268252	0.778649	-0.778649	0.0561535	1
365	OG0002590	127.713	131.334	122.431	128.45	87.1152	28.6747	106.069	114.038	167.62	158.742	-0.100287	0.100287	2.10967	-2.10967	-0.151325	0.151325	0.113712	-0.113712	0.245738	1
366	OG0002592	249.549	319.197	189.883	178.509	236.345	268.721	145.19	182.399	153.767	207.915	0.278332	-0.278332	-0.577868	0.577868	-1.02394	1.02394	-1.34961	1.34961	0.0366536	1
367	OG0002594	283.988	397.796	204.346	178.857	727.785	743.197	259.282	286.79	401.966	438.008	0.735768	-0.735768	-0.115894	0.115894	-0.557215	0.557215	-0.474634	0.474634	0.639637	1
368	OG0002597	61.4557	74.3812	156.397	164.254	87.4023	85.7494	64.285	75.9565	151.92	193.216	-0.295288	0.295288	0.115028	-0.115028	-1.00289	1.00289	-1.44185	1.44185	0.0376017	1
369	OG0002598	92.4294	94.8096	221.638	209.537	266.782	297.989	182.965	185.55	262.282	252.547	0.896572	-0.896572	-1.76524	1.76524	-0.224112	0.224112	0.604104	-0.604104	0.781977	1
370	OG0002599	136.844	142.921	105.684	123.585	152.574	156.436	95.1088	67.2808	193.401	195.058	-0.871634	0.871634	-0.139522	0.139522	1.91304	-1.91304	-0.0476157	0.0476157	0.630252	1
371	OG0002600	1073.73	1311.3	797.336	870.884	1401.41	1275.86	522.108	574.319	429.498	485.721	-0.659571	0.659571	0.701565	-0.701565	-0.712403	0.712403	-0.919026	0.919026	0.180184	1
372	OG0002603	194.106	277.739	423.686	461.137	196.748	197.614	194.586	209.881	177.548	186.535	-0.478211	0.478211	-0.0248159	0.0248159	-0.427264	0.427264	-0.278883	0.278883	0.0056622	1
373	OG0002609	593.327	685.17	192.73	184.945	254.228	234.965	91.1528	96.4793	82.4249	107.966	0.271482	-0.271482	0.51865	-0.51865	-0.373908	0.373908	-1.76697	1.76697	0.387152	1
374	OG0002612	649.406	1044.52	328.903	417.508	3716.01	3643.24	430.461	474.563	164.854	224.751	-0.818705	0.818705	0.0681976	-0.0681976	-0.336077	0.336077	-1.06029	1.06029	0.0235044	1
375	OG0002613	227.989	211.295	84.8327	72.1371	100.637	66.8362	38.243	37.6603	72.2707	97.8107	0.642411	-0.642411	1.60308	-1.60308	0.0609694	-0.0609694	-1.19273	1.19273	0.525557	1
376	OG0002623	335.841	333.938	120.913	116.629	332.924	358.969	139.696	172.647	233.193	206.038	0.296019	-0.296019	-0.617891	0.617891	-1.73165	1.73165	1.01479	-1.01479	0.558855	1
377	OG0002624	261.492	358.057	174.969	183.028	327.974	318.891	198.996	235.064	568.662	312.938	-0.140196	0.140196	0.0874421	-0.0874421	-0.517456	0.517456	1.80634	-1.80634	0.42818	1
378	OG0002625	61.8023	81.0454	247.073	220.925	244.394	223.885	108.541	119.434	291.373	283.01	0.739581	-0.739581	0.579742	-0.579742	-0.632488	0.632488	0.192743	-0.192743	0.349356	1
379	OG0002633	38.28	43.1022	325.745	347.11	102.346	51.9853	542.959	588.813	307.073	328.176	-0.199723	0.199723	2.05246	-2.05246	-0.254835	0.254835	-0.208948	0.208948	0.420909	1
380	OG0002638	288.475	275.405	121.641	168.256	104.289	113.512	81.5925	83.149	68.1102	106.897	-1.22611	1.22611	-0.322908	0.322908	-0.072042	0.072042	-1.68996	1.68996	0.0215302	1
381	OG0002643	1235.16	759.231	299.044	211.188	57.5888	304.875	302.056	283.51	630.306	201.501	0.403665	-0.403665	-1.59939	1.59939	0.0742485	-0.0742485	1.20853	-1.20853	0.960128	1
382	OG0002645	244.738	240.828	386.884	556.039	971.564	1258.78	413.33	440.192	522.024	618.401	-1.59447	1.59447	-1.14459	1.14459	-0.279727	0.279727	-0.751134	0.751134	0.00313372	1
383	OG0002648	107.091	120.212	119.271	149.482	178.255	194.499	47.0599	54.6921	48.4852	44.1003	-1.4864	1.4864	-0.576249	0.576249	-0.991834	0.991834	0.626249	-0.626249	0.105787	1
384	OG0002650	0	77.7842	910.885	912.186	591.564	602.086	677.576	714.939	587.366	741.063	-0.00150343	0.00150343	-0.0185682	0.0185682	-0.0565185	0.0565185	-0.243711	0.243711	0.0884789	1
385	OG0002653	660.528	486.273	403.785	292.011	94.8123	68.5501	194.996	186.503	860.961	390.444	0.732204	-0.732204	0.732745	-0.732745	0.101469	-0.101469	1.71377	-1.71377	0.0130952	1
386	OG0002654	663.445	669.091	380.161	412.385	370.135	396.837	324.309	416.697	220.492	461.135	-0.228033	0.228033	-0.195257	0.195257	-0.69925	0.69925	-1.97999	1.97999	0.0392436	1
387	OG0002656	815.347	886.163	827.003	701.007	1590.93	1626.09	595.133	614.943	1048.91	1061.26	1.84863	-1.84863	-0.245008	0.245008	-0.36701	0.36701	-0.131216	0.131216	0.485784	1
388	OG0002657	342.71	426.817	435.536	318.259	154.227	130.736	193.515	158.999	442.34	338.168	1.24435	-1.24435	0.65931	-0.65931	0.783128	-0.783128	1.06746	-1.06746	5.8583e-05	0.114295
389	OG0002658	96.9423	93.7299	38.072	26.0724	627.484	696.152	55.4656	84.5242	219.109	253.618	1.35017	-1.35017	-0.374426	0.374426	-1.49816	1.49816	-0.526866	0.526866	0.554168	1
390	OG0002661	234.19	283.56	362.523	402.415	507.307	562.063	404.418	473.928	299.803	520.714	-0.362407	0.362407	-0.355824	0.355824	-0.549944	0.549944	-1.87097	1.87097	0.0227449	1
391	OG0002663	500.744	808.976	355.16	422.06	444.602	377.385	185.355	228.289	172.238	338.062	-0.423553	0.423553	0.402382	-0.402382	-0.510743	0.510743	-1.59899	1.59899	0.116252	1
392	OG0002665	83.1988	92.9091	165.56	152.433	244.72	234.424	47.5528	55.8558	129.987	156.607	0.614889	-0.614889	0.320094	-0.320094	-1.19604	1.19604	-1.3836	1.3836	0.299647	1
393	OG0002666	1061.75	1171.96	651.646	734.199	1922.58	1730.14	438.209	557.394	557.811	906.753	-0.447167	0.447167	0.395481	-0.395481	-0.898652	0.898652	-1.78854	1.78854	0.0775438	1
394	OG0002670	1188.47	1371.91	748.013	990.751	562.635	200.099	769.69	924.37	325.084	570.292	-0.512519	0.512519	1.74498	-1.74498	-0.33521	0.33521	-1.00541	1.00541	0.95185	1
395	OG0002756	45.8138	38.4767	456.548	392.996	510.584	575.463	253.43	284.673	261.82	382.961	0.674142	-0.674142	-0.53835	0.53835	-0.523226	0.523226	-1.69311	1.69311	0.178804	1
396	OG0002758	377.783	617.354	445.648	427.586	338.498	324.56	420.325	415.002	293.915	322.03	0.177732	-0.177732	0.180623	-0.180623	0.0547521	-0.0547521	-0.3922	0.3922	0.958325	1
397	OG0002761	112.404	105.275	120.851	133.663	23.2854	77.9683	66.1806	61.6741	73.4205	62.8019	-0.194123	0.194123	-2.08267	2.08267	0.135925	-0.135925	0.300605	-0.300605	0.28201	1
398	OG0002762	99.589	144.512	109.952	153.306	275.066	240.615	120.658	117.74	417.749	426.602	-1.36278	1.36278	0.552857	-0.552857	0.101275	-0.101275	-0.0867661	0.0867661	0.518906	1
399	OG0002763	58.2806	89.4784	172.507	181.466	152.499	142.863	114.559	142.603	101.36	129.345	-0.198847	0.198847	0.256355	-0.256355	-0.856822	0.856822	-0.953118	0.953118	0.0732656	1
400	OG0002764	137.91	101.122	219.903	187.547	564.658	593.709	125.685	113.402	185.86	221.547	0.832609	-0.832609	-0.262956	0.262956	0.538674	-0.538674	-0.918423	0.918423	0.871115	1
401	OG0002766	68.9727	71.098	231.904	199.692	270.589	213.102	233.156	222.261	530.341	434.536	0.908696	-0.908696	1.44703	-1.44703	0.291276	-0.291276	1.20889	-1.20889	0.00157693	1
402	OG0002770	423.32	381.888	180.705	152.362	143.902	243.6	169.119	167.356	461.071	373.338	0.611424	-0.611424	-1.8486	1.8486	0.037651	-0.037651	0.755472	-0.755472	0.8022	1
403	OG0002771	260.331	435.136	201.257	211.185	229.587	320.226	100.631	110.757	456.918	514.709	-0.164142	0.164142	-1.1242	1.1242	-0.326687	0.326687	-0.405609	0.405609	0.0151586	1
404	OG0002772	282.174	298.636	316.585	294.969	115.095	195.724	254.01	274.625	287.91	339.131	0.269272	-0.269272	-1.9762	1.9762	-0.297088	0.297088	-0.622293	0.622293	0.0994575	1
405	OG0002773	33.1408	10.5846	190.834	182.679	266.19	227.695	141.18	142.918	276.599	283.274	0.0886705	-0.0886705	0.316542	-0.316542	-0.0248459	0.0248459	-0.0484204	0.0484204	0.209023	1
406	OG0002775	249.091	298.206	422.536	424.118	200.335	203.972	247.909	254.102	332.701	372.536	-0.036985	0.036985	-0.17811	0.17811	-0.244206	0.244206	-1.11828	1.11828	0.0632043	1
407	OG0002778	96.1207	113.488	318.791	270.804	345.044	369.275	176.207	165.453	302.689	283.541	1.33613	-1.33613	-0.556861	0.556861	0.516722	-0.516722	0.536181	-0.536181	0.146436	1
408	OG0002779	280.245	356.918	58.9263	62.3999	3038.46	2782.57	32.8843	28.4558	85.1978	91.9367	-0.39292	0.39292	0.603294	-0.603294	0.990806	-0.990806	-0.522116	0.522116	0.54217	1
409	OG0002783	132.244	160.959	151.024	157.651	95.821	92.3935	79.4497	86.0042	117.29	133.891	-0.356479	0.356479	0.302381	-0.302381	-0.657803	0.657803	-1.09742	1.09742	0.0724678	1
410	OG0002784	111.182	168.673	255.918	308.525	178.842	176.091	76.0706	87.3805	133.912	132.285	-0.837171	0.837171	0.0696119	-0.0696119	-0.621531	0.621531	0.0548874	-0.0548874	0.0890558	1
411	OG0002785	188.071	239.048	149.759	152.96	286.04	355.937	74.2582	69.714	174.087	183.331	-0.134345	0.134345	-1.38334	1.38334	0.401032	-0.401032	-0.328591	0.328591	0.220828	1
412	OG0002788	245.001	256.175	108.053	99.2507	180.052	151.833	54.6423	57.1263	75.9579	84.4459	0.795442	-0.795442	1.59277	-1.59277	-0.416329	0.416329	-0.991262	0.991262	0.574076	1
413	OG0002789	85.3446	108.752	242.964	241.778	107.923	124.782	64.4498	65.7998	110.826	129.88	0.0320895	-0.0320895	-0.949981	0.949981	-0.135908	0.135908	-1.03799	1.03799	0.0359431	1
414	OG0002790	139.448	132.685	243.122	229.783	141.693	128.902	163.186	194.545	228.109	241.32	0.543413	-0.543413	0.91072	-0.91072	-1.68882	1.68882	-0.542161	0.542161	0.655796	1
415	OG0002793	47.8862	107.591	863.017	891.326	890.557	872.131	518.811	492.758	359.022	386.43	-0.0884299	0.0884299	0.0572853	-0.0572853	0.141138	-0.141138	-0.201485	0.201485	0.68568	1
416	OG0002797	43.7612	39.2343	124.169	128.971	326.921	353.309	99.7233	101.343	159.766	163.814	-0.565748	0.565748	-1.15669	1.15669	-0.240245	0.240245	-0.373067	0.373067	0.00648251	1
417	OG0002798	48.3429	46.7722	155.606	128.622	798.487	944.746	66.5094	63.4196	84.7314	68.414	1.19835	-1.19835	-1.05906	1.05906	0.300178	-0.300178	1.34492	-1.34492	0.296874	1
418	OG0002799	269.707	320.796	171.087	155.39	51.8496	85.8373	99.6418	89.9194	196.711	187.604	0.375138	-0.375138	-1.92595	1.92595	0.400165	-0.400165	0.184893	-0.184893	0.566795	1
419	OG0002800	96.979	152.513	117.534	173.644	114.947	116.847	95.4385	102.295	38.5573	83.6469	-0.86354	0.86354	-0.0367173	0.0367173	-0.155398	0.155398	-1.65344	1.65344	0.0424886	1
420	OG0002801	173.45	221.786	266.035	301.046	232.386	242.708	252.603	279.171	200.175	279.268	-0.591946	0.591946	-0.208313	0.208313	-0.479025	0.479025	-1.58172	1.58172	0.0149745	1
421	OG0002803	57.3459	102.325	141.385	107.592	116.039	139.451	61.8957	65.1651	270.594	274.188	0.880688	-0.880688	-0.59461	0.59461	-0.166959	0.166959	-0.0428101	0.0428101	0.933601	1
422	OG0002804	106.399	155.108	86.8864	90.904	162.046	186.55	53.4892	57.0195	58.644	69.2158	-0.218794	0.218794	-0.680604	0.680604	-0.309297	0.309297	-0.80054	0.80054	0.00235619	1
423	OG0002805	1090.98	1314.49	356.234	395.433	346.671	354.935	140.686	149.902	51.4867	58.7906	-0.851361	0.851361	-0.192285	0.192285	-0.517753	0.517753	-1.08127	1.08127	0.00297508	1
424	OG0002809	33.0171	29.9514	91.9416	97.5125	193.3	192.219	53.4884	53.3169	137.375	113.311	-0.558815	0.558815	0.0532628	-0.0532628	0.030519	-0.030519	1.82425	-1.82425	0.390479	1
425	OG0002811	159.215	195.536	114.692	97.3352	100.833	157.851	75.5753	70.666	126.985	125.871	0.671309	-0.671309	-1.80756	1.80756	0.275294	-0.275294	0.0361286	-0.0361286	0.614759	1
426	OG0002812	119.895	152.339	933.001	1598.76	184.351	111.34	1058.64	1600.78	132.99	304.127	-0.957851	0.957851	0.899408	-0.899408	-0.742547	0.742547	-1.4261	1.4261	0.170632	1
427	OG0002813	163.401	188.479	1330.31	1848.36	798.497	907.771	996.746	1188.84	839.949	1254.17	-1.20299	1.20299	-0.472723	0.472723	-0.648755	0.648755	-1.46004	1.46004	0.00117025	1
428	OG0002814	153.679	201.083	171.087	170.687	177.678	210.539	103.103	162.701	131.834	165.957	0.00834621	-0.00834621	-0.603848	0.603848	-1.59951	1.59951	-0.817456	0.817456	0.0184108	1
429	OG0002815	496.995	461.939	279.978	268.182	688.241	675.394	120.823	137.101	233.653	268.041	0.444001	-0.444001	0.194405	-0.194405	-1.30221	1.30221	-1.41434	1.41434	0.182461	1
430	OG0002817	84.3534	103.514	203.944	243.169	159.92	140.154	145.548	160.161	109.549	159.741	-0.763171	0.763171	0.573008	-0.573008	-0.415841	0.415841	-1.62145	1.62145	0.133433	1
431	OG0002818	220.991	235.731	94.7851	84.4746	122.606	200.141	97.9926	102.191	104.59	108.23	0.486904	-0.486904	-2.03367	2.03367	-0.17753	0.17753	-0.144825	0.144825	0.270132	1
432	OG0002825	108.093	120.839	610.574	512.929	826.358	819.478	326.205	351.746	564.971	637.108	1.4718	-1.4718	0.0707837	-0.0707837	-0.637971	0.637971	-1.01625	1.01625	0.944951	1
433	OG0002826	124.098	69.8996	205.368	187.549	131.989	193.664	131.207	125.148	518.792	228.225	0.185887	-0.185887	-0.776297	0.776297	0.096878	-0.096878	1.59438	-1.59438	0.457608	1
434	OG0002828	272.76	308.187	68.0889	83.2578	90.956	118.981	165.904	179.307	131.6	133.888	-1.16747	1.16747	-1.55495	1.55495	-0.452241	0.452241	-0.100385	0.100385	0.0128387	1
435	OG0002829	595.842	480.715	235.067	226.135	194.497	209.976	167.471	195.707	329.471	363.987	0.27828	-0.27828	-0.549855	0.549855	-1.11708	1.11708	-0.715149	0.715149	0.0443411	1
436	OG0002832	314.401	344.149	94.6287	102.553	857.638	817.638	101.373	124.512	53.5623	82.8478	-0.345717	0.345717	0.205394	-0.205394	-0.88122	0.88122	-1.84682	1.84682	0.0594174	1
437	OG0002833	224.503	267.328	223.693	275.846	931.363	596.807	298.513	345.608	363.408	539.295	-0.668611	0.668611	1.40204	-1.40204	-0.468237	0.468237	-1.24782	1.24782	0.566898	1
438	OG0002836	109.485	121.844	388.463	397.169	2427.7	2420.9	322.118	383.637	451.37	653.675	-0.11196	0.11196	0.0141675	-0.0141675	-0.880597	0.880597	-1.84947	1.84947	0.0586418	1
439	OG0002837	349.55	437.412	329.732	381.314	455.584	411.474	618.845	719.927	217.258	369.334	-0.503998	0.503998	0.353447	-0.353447	-0.524566	0.524566	-1.80118	1.80118	0.0960869	1
440	OG0002838	195.879	323.315	275.509	268.368	194.536	188.275	77.2244	84.9474	69.7264	88.4572	0.100381	-0.100381	0.125051	-0.125051	-0.364117	0.364117	-0.905377	0.905377	0.178737	1
441	OG0002840	96.2093	80.1536	253.506	219.389	197.009	189.184	131.289	115.097	216.336	177.449	0.915028	-0.915028	0.256964	-0.256964	0.833517	-0.833517	1.2525	-1.2525	0.00141929	1
442	OG0002841	463.625	508.799	278.51	267.85	136.823	156.64	104.092	105.682	359.204	390.698	0.438231	-0.438231	-1.51671	1.51671	-0.170187	0.170187	-0.9433	0.9433	0.120971	1
443	OG0002843	294.537	382.229	862.706	956.156	368.089	379.25	213.872	247.965	196.252	231.429	-0.610543	0.610543	-0.177476	0.177476	-0.877217	0.877217	-0.977405	0.977405	0.0019602	1
444	OG0002844	103.268	142.399	222.585	218.139	148.501	73.3924	144.806	143.765	136.195	164.905	0.055416	-0.055416	1.85924	-1.85924	0.0198125	-0.0198125	-0.523729	0.523729	0.373973	1
445	OG0002849	462.675	787.31	829.678	803.895	1440	1848.77	268.76	300.333	1500.27	1274.21	0.109867	-0.109867	-0.865229	0.865229	-0.3862	0.3862	0.56719	-0.56719	0.536007	1
446	OG0002850	299.302	481.601	491.619	718.035	160.266	114.174	267.853	322.016	93.7404	187.604	-0.814786	0.814786	0.731097	-0.731097	-0.399706	0.399706	-1.4523	1.4523	0.186734	1
447	OG0002852	57.4329	64.4171	97.4707	103.42	320.026	261.684	57.9381	65.0604	69.2646	66.2761	-0.467502	0.467502	1.58312	-1.58312	-0.914031	0.914031	0.348037	-0.348037	0.735096	1
448	OG0002853	755.433	821.765	526.057	562.468	704.97	732.806	231.508	220.883	265.053	308.665	-0.724484	0.724484	-0.419323	0.419323	0.508694	-0.508694	-1.64644	1.64644	0.119356	1
449	OG0002857	183.335	147.269	589.192	507.39	359.148	290.18	316.923	332.911	762.375	661.713	0.85384	-0.85384	1.21571	-1.21571	-0.281616	0.281616	0.809052	-0.809052	0.0295891	1
450	OG0002858	394.007	397.297	384.67	382.221	353.54	692.282	243.706	289.855	382.576	504.554	0.0186881	-0.0186881	-1.89602	1.89602	-0.506298	0.506298	-0.804869	0.804869	0.0315381	1
451	OG0002862	107.824	123.497	87.9938	86.0372	77.1756	54.5259	293.898	349.098	62.3381	76.4313	0.104611	-0.104611	1.60019	-1.60019	-0.798784	0.798784	-0.944962	0.944962	0.981976	1
452	OG0002869	116.68	143.101	107.423	128.973	130.435	141.964	154.695	168.729	140.609	170.501	-1.08855	1.08855	-0.505421	0.505421	-0.518132	0.518132	-1.14728	1.14728	0.000596222	1
453	OG0002873	182.563	174.361	129.064	131.405	104.325	131.475	39.4768	47.7102	149.15	191.076	-0.097832	0.097832	-1.25348	1.25348	-1.02806	1.02806	-1.34154	1.34154	0.00364365	1
454	OG0002874	511.621	559.014	93.0284	86.8419	250.131	230.988	73.1868	77.1201	86.8116	115.184	0.460164	-0.460164	0.532334	-0.532334	-0.350112	0.350112	-1.87924	1.87924	0.464761	1
455	OG0002878	358.338	468.597	190.992	250.293	351.751	372.716	126.84	147.046	160.463	210.592	-1.16023	1.16023	-0.249856	0.249856	-0.636946	0.636946	-1.16642	1.16642	0.00220007	1
456	OG0002879	460.129	536.19	1061.56	1241.53	893.834	1038.33	587.878	728.454	786.844	1183.89	-0.62868	0.62868	-0.60168	0.60168	-0.859187	0.859187	-1.6209	1.6209	0.00150486	1
457	OG0002885	157.579	177.409	108.685	102.2	240.44	264.211	159.889	166.194	116.136	141.638	0.502836	-0.502836	-0.770235	0.770235	-0.316172	0.316172	-1.61772	1.61772	0.12924	1
458	OG0002886	125.9	97.2323	376.141	345.722	769.661	866.27	284.585	300.855	659.117	646.28	0.594108	-0.594108	-0.832583	0.832583	-0.391831	0.391831	0.138645	-0.138645	0.596099	1
459	OG0002889	196.554	255.905	194.15	185.291	307.014	287.645	151.069	167.886	72.9541	82.4523	0.311193	-0.311193	0.434145	-0.434145	-0.702787	0.702787	-0.814665	0.814665	0.437605	1
460	OG0002895	123.791	111.616	241.86	198.324	282.148	314.353	114.56	122.183	214.949	219.935	1.63137	-1.63137	-0.89054	0.89054	-0.531146	0.531146	-0.189121	0.189121	0.990076	1
461	OG0002896	90.079	134.309	174.721	225.09	286.987	313.299	857.874	988.48	131.836	178.782	-0.919408	0.919408	-0.319877	0.319877	-0.516231	0.516231	-1.10299	1.10299	0.00135474	1
462	OG0002898	26.0469	45.2056	42.6533	46.4106	161.324	153.978	43.6396	39.1054	122.137	187.334	-0.256204	0.256204	0.141493	-0.141493	0.332792	-0.332792	-1.27945	1.27945	0.336919	1
463	OG0002900	144.406	167.679	128.75	167.385	80.8535	67.229	115.053	133.186	83.8102	133.621	-0.928394	0.928394	0.654723	-0.654723	-0.519821	0.519821	-1.63021	1.63021	0.123637	1
464	OG0002904	144.616	254.918	241.86	249.426	158.652	199.231	209.668	132.552	95.1211	136.024	-0.0789081	0.0789081	-0.580973	0.580973	1.15462	-1.15462	-0.9067	0.9067	0.758437	1
465	OG0002908	32.6827	64.2864	175.509	151.74	1078.88	962.462	54.1469	51.3069	120.751	123.469	0.453178	-0.453178	0.355835	-0.355835	0.168029	-0.168029	-0.0694215	0.0694215	0.031708	1
466	OG0002910	233.501	303.511	241.228	317.212	467.552	454.241	217.086	248.705	104.359	158.207	-1.0056	1.0056	0.106716	-0.106716	-0.501701	0.501701	-1.5157	1.5157	0.024933	1
467	OG0002911	80.824	72.5212	180.248	156.434	179.403	173.803	146.536	146.835	87.0448	105.563	1.13646	-1.13646	0.254738	-0.254738	-0.0163835	0.0163835	-1.54482	1.54482	0.917725	1
468	OG0002912	72.1203	63.0653	71.0873	71.0907	128.379	137.768	56.2914	50.8827	83.1198	91.3969	-0.000504574	0.000504574	-0.729367	0.729367	1.04339	-1.04339	-0.980582	0.980582	0.621858	1
469	OG0002913	45.5129	54.8579	70.141	75.6099	118.147	133.499	46.3182	42.7381	66.2631	63.6037	-0.632569	0.632569	-1.0285	1.0285	0.677697	-0.677697	0.345231	-0.345231	0.594529	1
470	OG0002915	164.463	207.907	264.136	259.16	360.428	411.649	255.493	306.891	228.575	313.208	0.0894547	-0.0894547	-0.624047	0.624047	-0.859686	0.859686	-1.46939	1.46939	0.0199989	1
471	OG0002916	1759.26	2114.98	685.615	444.795	1285.91	1214.77	543.61	479.418	1975.37	1174.48	1.28747	-1.28747	0.171938	-0.171938	0.379201	-0.379201	1.53661	-1.53661	0.0118466	1
472	OG0002917	105.087	145.814	269.032	296.182	278.056	292.471	266.37	287.848	206.868	260.561	-0.485837	0.485837	-0.255537	0.255537	-0.391954	0.391954	-1.16179	1.16179	0.00692303	1
473	OG0002918	552.624	468.205	417.233	440.902	239.871	396.886	171.427	227.762	205.021	278.469	-0.175301	0.175301	-1.56725	1.56725	-0.896948	0.896948	-0.965522	0.965522	0.00422769	1
474	OG0002919	169.029	204.513	541.856	503.896	727.87	713.434	189.64	181.214	760.297	759.77	0.735599	-0.735599	0.202968	-0.202968	0.460419	-0.460419	0.00702274	-0.00702274	0.0199841	1
475	OG0002921	267.112	306.909	111.369	133.315	143.256	134.549	89.0059	101.342	120.98	154.199	-1.05366	1.05366	0.3682	-0.3682	-0.76137	0.76137	-1.41817	1.41817	0.0392362	1
476	OG0002923	61.6847	104.705	132.067	130.188	227.603	201.635	83.4057	75.0033	132.757	98.3452	0.0491732	-0.0491732	0.415193	-0.415193	0.364016	-0.364016	1.02189	-1.02189	0.018168	1
477	OG0002924	601.386	669.139	458.604	487.376	331.132	319.066	268.678	313.235	283.292	353.3	-0.434318	0.434318	0.264971	-0.264971	-1.09334	1.09334	-1.57032	1.57032	0.0460154	1
478	OG0002927	208.917	306.294	594.511	735.374	505.639	594.385	1112.72	1214.12	349.555	462.866	-0.821543	0.821543	-0.625742	0.625742	-0.338011	0.338011	-1.08178	1.08178	0.00065528	1
479	OG0002929	189.529	190.369	421.005	375.792	700.625	741.315	118.845	96.6898	327.852	285.947	0.867623	-0.867623	-0.43147	0.43147	1.57169	-1.57169	1.0439	-1.0439	0.0442652	1
480	OG0002930	368.708	439.313	176.461	159.045	80.6543	74.2246	112.169	120.81	156.076	188.406	0.738458	-0.738458	0.590565	-0.590565	-0.52763	0.52763	-1.33507	1.33507	0.713586	1
481	OG0002936	261.782	315.533	142.339	115.24	148.444	189.701	89.1526	92.4329	190.478	187.601	1.1928	-1.1928	-1.38331	1.38331	-0.204814	0.204814	0.0862509	-0.0862509	0.843264	1
482	OG0002939	476.857	448.077	411.211	416.811	627.391	690.703	166.108	179.43	246.125	323.361	-0.094182	0.094182	-0.668941	0.668941	-0.536971	0.536971	-1.88879	1.88879	0.0260954	1
483	OG0002943	48.1062	90.9158	215.319	191.025	1031.11	1434.34	306.362	302.676	790.999	720.221	0.355345	-0.355345	-0.972113	0.972113	0.0359697	-0.0359697	0.278378	-0.278378	0.739107	1
484	OG0002944	889.032	1119.49	501.342	586.968	509.485	467.818	522.247	579.873	283.733	365.938	-0.835362	0.835362	0.452675	-0.452675	-0.555152	0.555152	-1.34346	1.34346	0.0768184	1
485	OG0002945	89.0893	109.562	776.292	736.627	736.873	583.753	473.042	565.145	469.381	632.298	0.238251	-0.238251	1.05366	-1.05366	-0.806202	0.806202	-1.34387	1.34387	0.591421	1
486	OG0002949	804.541	1226.63	808.361	993.874	303.134	254.353	721.42	845.353	441.677	609.045	-0.71578	0.71578	0.608453	-0.608453	-0.550041	0.550041	-1.10764	1.10764	0.141687	1
487	OG0002952	168.085	185.945	180.093	179.554	53.7661	83.673	118.433	139.639	223.258	241.592	0.0131942	-0.0131942	-1.91331	1.91331	-0.722533	0.722533	-0.346794	0.346794	0.0458832	1
488	OG0002953	556.736	871.467	449.672	460.604	267.61	328.18	406.066	398.713	230.621	267.397	-0.100251	0.100251	-0.848646	0.848646	0.0762697	-0.0762697	-0.61643	0.61643	0.0509345	1
489	OG0002954	377.989	386.763	307.579	290.446	111.065	122.304	146.619	142.707	391.488	365.152	0.889694	-0.889694	-1.49559	1.49559	0.419889	-0.419889	1.08093	-1.08093	0.610878	1
490	OG0002955	44.8639	54.7016	132.857	93.6868	179.957	91.6437	47.7193	43.5855	452.99	646.459	0.868386	-0.868386	1.63306	-1.63306	0.227383	-0.227383	-0.883778	0.883778	0.266474	1
491	OG0002956	201.55	190.798	143.284	125.147	146.427	141.028	63.8737	63.6841	143.609	119.455	1.20695	-1.20695	0.335501	-0.335501	0.0265628	-0.0265628	1.64024	-1.64024	0.0231735	1
492	OG0002958	558.66	649.939	208.842	152.782	443.128	375.279	122.801	104.412	248.198	252.544	1.58156	-1.58156	0.845809	-0.845809	0.825678	-0.825678	-0.0885435	0.0885435	0.0169849	1
493	OG0002959	290.166	358.986	203.628	220.051	162.268	147.551	72.6091	73.0992	150.073	145.914	-0.66679	0.66679	0.817147	-0.817147	-0.0578578	0.0578578	0.241713	-0.241713	0.715392	1
494	OG0002961	609.822	672.706	427.167	393.519	992.919	1004.99	240.492	273.461	425.287	499.209	0.71905	-0.71905	-0.10594	0.10594	-1.12504	1.12504	-1.40234	1.40234	0.213871	1
495	OG0002962	919.489	989.489	325.587	422.548	177.101	310.5	212.223	252.621	193.708	248.001	-0.80845	0.80845	-1.70656	1.70656	-0.542105	0.542105	-0.766732	0.766732	0.00189848	1
496	OG0002963	695.581	965.418	290.516	355.798	202.914	166.83	489.061	565.857	526.642	606.907	-0.901968	0.901968	0.871482	-0.871482	-0.650084	0.650084	-0.632315	0.632315	0.294974	1
497	OG0002965	130.131	147.239	248.492	184.594	282.482	308.253	135.079	139.745	320.229	328.711	1.87259	-1.87259	-0.553706	0.553706	-0.215488	0.215488	-0.165893	0.165893	0.570726	1
498	OG0002966	59.7742	82.0023	111.057	99.4245	95.2908	94.8984	45.494	45.3828	75.4984	103.156	0.516059	-0.516059	0.0192641	-0.0192641	0.0114229	-0.0114229	-1.4456	1.4456	0.481626	1
499	OG0002967	109.027	130.409	332.184	340.299	146.266	143.906	61.7293	64.213	131.603	139.498	-0.263691	0.263691	0.177716	-0.177716	-0.430962	0.430962	-0.6364	0.6364	0.056552	1
500	OG0002969	122.893	182.87	185.149	187.895	212.274	247.418	39.9721	39.6703	143.839	167.294	-0.069796	0.069796	-0.724759	0.724759	0.0359205	-0.0359205	-0.714625	0.714625	0.0433134	1
501	OG0002970	327.479	354.216	267.613	251.333	44.349	89.7073	234.475	259.603	298.701	285.412	0.192027	-0.192027	-2.07104	2.07104	-0.311301	0.311301	0.139257	-0.139257	0.221456	1
502	OG0002971	940.557	1809.51	1987.33	3315.54	238.722	130.261	2016.49	2912.96	492.931	1118.68	-0.807632	0.807632	0.947818	-0.947818	-0.586404	0.586404	-1.25198	1.25198	0.255719	1
503	OG0002977	76.6669	87.3378	165.242	147.048	280.813	248.036	108.708	106	172.928	191.877	1.03254	-1.03254	1.09846	-1.09846	0.223491	-0.223491	-0.920598	0.920598	0.322643	1
504	OG0002978	984.453	1030.19	566.264	584.107	496.123	595.516	128.817	169.578	540.723	442.551	-0.169518	0.169518	-0.995083	0.995083	-1.49292	1.49292	1.09119	-1.09119	0.364538	1
505	OG0002979	554.602	977.717	1029.7	1473.48	143.654	510.456	482.385	523.754	4732.85	6245.18	-0.565169	0.565169	-1.78765	1.78765	-0.131075	0.131075	-0.439161	0.439161	0.0295694	1
506	OG0002982	26.7372	59.0731	75.0382	56.8378	144.435	143.884	35.6864	31.3131	94.4307	90.5952	0.719125	-0.719125	0.00995104	-0.00995104	0.340118	-0.340118	0.108016	-0.108016	0.0385118	1
507	OG0002985	610.225	723.625	394.94	367.447	680.911	755.828	218.239	209.987	412.817	376.275	0.65206	-0.65206	-0.942861	0.942861	0.348453	-0.348453	0.83737	-0.83737	0.46084	1
508	OG0002986	114.759	138.267	80.8833	98.0322	121.17	121.535	47.3072	46.1233	73.1919	64.6753	-1.37718	1.37718	-0.0215975	0.0215975	0.182054	-0.182054	0.887581	-0.887581	0.814072	1
509	OG0002988	49.192	45.8459	54.0275	49.8834	104.866	109.033	27.7744	26.1295	58.4131	62.5347	1.16185	-1.16185	-0.567531	0.567531	0.889009	-0.889009	-0.99277	0.99277	0.755189	1
510	OG0002990	71.7706	97.466	96.8388	93.8606	144.127	131.975	56.5378	56.2789	71.3425	82.5779	0.189487	-0.189487	0.534025	-0.534025	0.027843	-0.027843	-0.885661	0.885661	0.880612	1
511	OG0002993	639.933	831.411	822.896	788.255	648.907	552.963	491.629	552.452	713.885	717.276	0.2767	-0.2767	1.02736	-1.02736	-0.749714	0.749714	-0.0304922	0.0304922	0.632838	1
512	OG0002995	873.271	648.803	302.838	256.724	219.891	236.165	156.188	119.032	457.146	291.027	0.560335	-0.560335	-0.242636	0.242636	0.91793	-0.91793	1.50967	-1.50967	0.0380519	1
513	OG0002997	69.0536	104.947	521.79	603.837	88.4213	146.197	148.432	155.189	436.831	391.507	-0.462027	0.462027	-1.56094	1.56094	-0.141062	0.141062	0.346834	-0.346834	0.163422	1
514	OG0002998	138.672	85.2355	155.128	115.242	240.621	256.77	57.3612	79.658	272.418	222.346	0.916892	-0.916892	-0.201797	0.201797	-1.01137	1.01137	0.628994	-0.628994	0.795963	1
515	OG0002999	49.6471	49.5813	83.095	95.2546	84.3684	71.4258	33.2139	32.1594	67.1867	64.9372	-1.31479	1.31479	1.60206	-1.60206	0.311073	-0.311073	0.328324	-0.328324	0.603302	1
516	OG0003001	564.911	575.17	455.599	495.2	716.692	683.081	233.487	228.501	673.469	685.792	-1.73578	1.73578	1.00068	-1.00068	0.449802	-0.449802	-0.377825	0.377825	0.707214	1
517	OG0003002	179.657	152.735	460.812	420.633	345.566	271.163	361.067	368.986	288.603	292.903	0.632601	-0.632601	1.67427	-1.67427	-0.150538	0.150538	-0.102632	0.102632	0.139516	1
518	OG0003004	105.379	103.321	56.3956	48.3208	58.8148	90.1605	34.2029	25.1774	62.3381	51.8423	0.571694	-0.571694	-1.55997	1.55997	1.12688	-1.12688	0.681514	-0.681514	0.646281	1
519	OG0003005	202.358	210.337	822.259	785.473	258.444	220.147	300.408	298.216	645.777	792.911	0.364086	-0.364086	1.27328	-1.27328	0.058264	-0.058264	-1.62732	1.62732	0.969495	1
520	OG0003014	285.842	385.057	190.674	173.121	108.978	144.45	80.7683	78.3885	114.287	123.466	0.479842	-0.479842	-1.39193	1.39193	0.148696	-0.148696	-0.383948	0.383948	0.359679	1
521	OG0003015	312.248	265.458	547.858	505.978	1126.78	1148.95	525.49	558.029	731.203	780.348	0.834999	-0.834999	-0.204698	0.204698	-0.631001	0.631001	-0.683134	0.683134	0.517855	1
522	OG0003017	184.252	266.536	142.811	113.328	55.4111	75.4853	82.9936	76.8017	87.0425	87.9227	0.912444	-0.912444	-1.21568	1.21568	0.307161	-0.307161	-0.039879	0.039879	0.978271	1
523	OG0003018	531.405	611.905	284.355	298.791	101.167	166.091	179.421	174.443	322.08	355.17	-0.202626	0.202626	-1.98837	1.98837	0.115158	-0.115158	-0.399919	0.399919	0.111024	1
524	OG0003020	43.4802	27.0173	144.391	140.619	101.177	136.26	92.802	89.1799	103.433	81.2417	0.0928773	-0.0928773	-1.03688	1.03688	0.139676	-0.139676	0.843265	-0.843265	0.972907	1
525	OG0003024	134.439	109.098	83.7316	90.0749	152.556	124.729	64.5323	74.0502	234.348	260.027	-0.449655	0.449655	1.23642	-1.23642	-0.846182	0.846182	-0.639965	0.639965	0.622986	1
526	OG0003025	113.774	54.0537	231.592	222.658	78.2386	72.5767	154.531	166.298	297.18	315.453	0.115416	-0.115416	0.220327	-0.220327	-0.21524	0.21524	-0.175047	0.175047	0.863249	1
527	OG0003026	29.5488	40.8127	129.699	144.613	166.942	140.503	71.7025	94.2556	74.344	149.124	-0.282711	0.282711	0.447163	-0.447163	-0.706648	0.706648	-1.74006	1.74006	0.12781	1
528	OG0003028	266.222	294.957	115.32	102.376	251.421	355.443	44.8338	42.6324	111.978	128.279	0.624657	-0.624657	-1.80069	1.80069	0.264414	-0.264414	-0.712776	0.712776	0.331724	1
529	OG0003030	95.6274	127.502	121.641	133.664	664.666	662.202	71.4553	69.5024	97.8986	142.975	-0.415398	0.415398	0.0163848	-0.0163848	0.122201	-0.122201	-1.65062	1.65062	0.144733	1
530	OG0003031	216.834	215.235	353.071	329.904	114.844	152.951	179.271	202.894	300.608	268.848	0.427399	-0.427399	-1.79296	1.79296	-0.778849	0.778849	0.702729	-0.702729	0.410087	1
531	OG0003032	349.885	431.494	190.357	230.829	102.427	126.498	206.867	210.095	427.363	470.611	-1.1124	1.1124	-1.21728	1.21728	-0.0896321	0.0896321	-0.557552	0.557552	0.0069614	1
532	OG0003036	72.0561	107.979	406.312	406.206	211.053	234.221	106.894	132.55	172.469	203.104	0.00112412	-0.00112412	-0.448159	0.448159	-0.922882	0.922882	-0.702592	0.702592	0.0101703	1
533	OG0003039	41.1008	56.2526	500.309	556.908	583.394	566.465	272.775	302.989	282.83	328.441	-0.601673	0.601673	0.165458	-0.165458	-0.589762	0.589762	-0.838581	0.838581	0.0233573	1
534	OG0003040	593.887	746.195	532.375	355.104	204.496	347.164	75.7401	70.7729	453.914	334.32	1.11713	-1.11713	-1.44637	1.44637	0.18961	-0.18961	0.848552	-0.848552	0.678262	1
535	OG0003045	173.502	210.114	635.378	657.546	626.046	633.148	382.705	442.221	748.06	829.79	-0.276347	0.276347	-0.0909006	0.0909006	-1.16285	1.16285	-0.834868	0.834868	0.0149097	1
536	OG0003046	140.352	147.399	72.3526	86.9062	106.058	135.2	68.5715	63.8956	73.8799	82.8425	-1.15731	1.15731	-1.52974	1.52974	0.447029	-0.447029	-0.724241	0.724241	0.050218	1
537	OG0003047	182.618	198.765	104.897	98.3798	78.3136	89.7018	69.3965	66.4345	157.695	139.501	0.630442	-0.630442	-1.33282	1.33282	0.428789	-0.428789	1.20381	-1.20381	0.56968	1
538	OG0003052	2636.32	2921.88	4403.24	4388.33	6187.55	6400.34	3777.2	3842.84	1928.33	1822.06	0.0583322	-0.0583322	-0.581319	0.581319	-0.296239	0.296239	0.974389	-0.974389	0.876466	1
539	OG0003053	419.381	574.545	204.894	241.257	373.541	357.931	236.206	263.834	170.16	202.305	-0.84394	0.84394	0.220973	-0.220973	-0.572109	0.572109	-0.893646	0.893646	0.0285477	1
540	OG0003055	155.881	181.665	257.026	244.385	324.857	333.646	235.3	254.206	204.795	234.906	0.472132	-0.472132	-0.249946	0.249946	-0.723327	0.723327	-1.28254	1.28254	0.140717	1
541	OG0003056	260.394	203.836	183.724	181.292	341.537	438.047	82.6647	81.5632	349.094	219.139	0.0491848	-0.0491848	-0.91396	0.91396	0.0495182	-0.0495182	1.68843	-1.68843	0.588353	1
542	OG0003057	84.0388	93.7594	151.971	172.773	128.619	182.433	180.741	185.763	194.567	178.325	-0.687141	0.687141	-1.85581	1.85581	-0.146991	0.146991	0.467201	-0.467201	0.162302	1
543	OG0003058	53.0131	30.9928	83.2529	110.547	26.2158	83.2033	68.1586	74.5802	71.1117	87.121	-0.489795	0.489795	-1.81129	1.81129	-0.156459	0.156459	-0.351866	0.351866	0.0384232	1
544	OG0003059	64.2245	93.8567	193.678	163.559	74.7987	185.96	57.7741	55.2221	130.451	174.509	0.361063	-0.361063	-1.82566	1.82566	0.0967197	-0.0967197	-0.618719	0.618719	0.200893	1
545	OG0003062	186.861	172.464	473.103	395.431	433.049	517.37	301.646	272.084	560.117	583.655	1.32328	-1.32328	-1.31279	1.31279	0.762422	-0.762422	-0.304503	0.304503	0.786295	1
546	OG0003063	546.859	633.709	673.352	659.374	280.733	142.173	287.079	335.737	790.896	954.723	0.0622394	-0.0622394	1.94432	-1.94432	-0.463629	0.463629	-0.556946	0.556946	0.571178	1
547	OG0003068	170.132	195.862	214.214	201.451	263.138	213.396	110.274	100.604	108.284	103.153	0.46678	-0.46678	1.58679	-1.58679	0.697113	-0.697113	0.368887	-0.368887	0.00734374	1
548	OG0003070	51.7165	72.6849	186.886	226.656	263.805	284.014	144.639	163.586	205.485	208.981	-0.985292	0.985292	-0.377953	0.377953	-0.629796	0.629796	-0.0864163	0.0864163	0.00842244	1
549	OG0003071	47.6083	70.0761	78.8296	72.8306	69.7345	79.6986	29.3403	22.8501	72.9587	62.8019	0.33293	-0.33293	-0.561224	0.561224	1.04668	-1.04668	0.629691	-0.629691	0.183698	1
550	OG0003074	51.9242	41.3693	312.003	262.462	292.522	302.164	171.26	159.424	275.899	289.696	1.22296	-1.22296	-0.229925	0.229925	0.507597	-0.507597	-0.345926	0.345926	0.305267	1
551	OG0003075	47.6495	71.2237	600.419	784.812	1141.9	1165.66	347.221	400.723	155.261	249.337	-0.827891	0.827891	-0.064063	0.064063	-0.444887	0.444887	-1.44613	1.44613	0.0156457	1
552	OG0003076	79.1028	80.7379	93.9952	81.1721	84.9426	83.5219	35.6032	36.4977	79.4257	90.5978	1.55242	-1.55242	0.178833	-0.178833	-0.263111	0.263111	-1.39346	1.39346	0.966824	1
553	OG0003077	13.3373	63.0266	92.4155	100.29	202.495	144.36	100.054	96.055	45.2529	40.8881	-0.128348	0.128348	0.526437	-0.526437	0.0640452	-0.0640452	0.159151	-0.159151	0.161006	1
554	OG0003078	58.4394	95.1645	916.097	856.045	406.037	1056.01	473.035	524.975	677.177	919.848	0.135425	-0.135425	-1.77669	1.77669	-0.207987	0.207987	-0.607271	0.607271	0.0819474	1
555	OG0003079	371.704	278.282	495.568	456.788	101.749	59.7664	377.454	384.825	343.093	273.656	0.26961	-0.26961	1.72102	-1.72102	-0.0640307	0.0640307	0.745438	-0.745438	0.0509638	1
556	OG0003081	179.217	107.958	178.989	164.953	152.6	341.559	130.464	135.301	226.264	221.547	0.188956	-0.188956	-1.77053	1.77053	-0.0842752	0.0842752	0.0487806	-0.0487806	0.25919	1
557	OG0003083	64.0947	81.3893	270.613	334.248	233.849	269.27	107.058	102.508	122.139	109.305	-1.21567	1.21567	-0.813506	0.813506	0.250898	-0.250898	0.640758	-0.640758	0.392722	1
558	OG0003086	336.192	380.654	135.859	175.205	29.1772	84.7661	102.114	120.279	303.848	336.461	-0.519161	0.519161	-2.00239	2.00239	-0.335247	0.335247	-0.209051	0.209051	0.0406507	1
559	OG0003087	819.295	897.588	678.503	721.162	601.475	673.248	541.147	592.62	527.565	642.715	-0.482954	0.482954	-0.892207	0.892207	-0.719415	0.719415	-1.55917	1.55917	0.00139111	1
560	OG0003091	41.9972	70.8575	185.283	236.216	179.178	194.23	112.598	134.795	137.606	147.52	-0.85029	0.85029	-0.28364	0.28364	-0.631348	0.631348	-0.244686	0.244686	0.00269858	1
561	OG0003093	34.1641	31.6637	123.221	110.371	130.401	116.157	156.261	155.931	158.847	172.906	1.19075	-1.19075	1.25058	-1.25058	0.0229108	-0.0229108	-0.917362	0.917362	0.332107	1
562	OG0003098	176.952	213.031	171.244	204.232	131.738	164.185	120.935	143.519	223.958	277.937	-0.858225	0.858225	-1.07104	1.07104	-0.834195	0.834195	-1.0506	1.0506	6.3402e-07	0.00124585
563	OG0003099	8997.06	15928.1	158.133	158.696	211.324	180.914	112.252	111.712	397.115	482.91	-0.0123607	0.0123607	0.539741	-0.539741	0.0167827	-0.0167827	-0.678707	0.678707	0.855165	1
564	OG0003100	31.4762	56.35	407.418	372.66	687.789	410.504	173.487	167.144	807.962	869.844	0.245991	-0.245991	1.39382	-1.39382	0.102801	-0.102801	-0.20362	0.20362	0.170185	1
565	OG0003102	39.4559	47.1153	114.532	125.147	90.4206	76.3945	52.4994	80.0811	111.978	162.748	-0.305971	0.305971	0.580863	-0.580863	-1.43718	1.43718	-1.27667	1.27667	0.115588	1
566	OG0003103	274.782	338.041	460.815	464.61	616.66	619.791	358.513	363.486	568.201	561.212	-0.0838422	0.0838422	-0.0517724	0.0517724	-0.140838	0.140838	0.126525	-0.126525	0.393601	1
567	OG0003109	205.748	238.984	106.946	126.538	256.77	195.949	104.751	110.761	195.79	173.17	-0.948611	0.948611	1.51877	-1.51877	-0.315252	0.315252	0.693071	-0.693071	0.561012	1
568	OG0003111	684.255	841.83	475.832	441.324	692.219	654.302	494.601	547.75	364.563	331.111	0.598541	-0.598541	0.447953	-0.447953	-0.811138	0.811138	0.764945	-0.764945	0.363365	1
569	OG0003114	102.005	107.13	56.0812	68.1359	127.398	118.775	28.2689	24.3311	56.1043	73.4916	-1.10275	1.10275	0.398061	-0.398061	0.850687	-0.850687	-1.52456	1.52456	0.428036	1
570	OG0003116	46.6507	25.1316	192.888	173.291	486.89	476.871	92.9668	86.5352	166.006	177.454	0.36787	-0.36787	0.071462	-0.071462	0.246295	-0.246295	-0.229113	0.229113	0.259349	1
571	OG0003118	94.6179	88.1572	156.076	128.62	425.952	426.778	254.255	269.229	487.39	464.742	1.87263	-1.87263	-0.0188096	0.0188096	-0.555421	0.555421	0.461862	-0.461862	0.277148	1
572	OG0003121	154.801	172.839	273.021	324.9	518.028	500.753	430.023	458.541	343.786	431.864	-1.16946	1.16946	0.228546	-0.228546	-0.432578	0.432578	-1.5305	1.5305	0.0395231	1
573	OG0003124	87.078	118.039	89.414	99.2489	254.401	281.809	101.537	120.176	93.5049	109.837	-0.541977	0.541977	-0.531411	0.531411	-0.873997	0.873997	-0.835026	0.835026	3.977e-05	0.0776311
574	OG0003125	117.589	181.779	84.3603	92.6456	85.0021	69.9481	118.68	125.887	152.615	179.59	-0.389268	0.389268	0.807953	-0.807953	-0.245071	0.245071	-0.67526	0.67526	0.603532	1
575	OG0003126	633.795	798.651	285.46	353.543	564.273	575.123	287.633	349.203	398.962	443.62	-1.1775	1.1775	-0.105241	0.105241	-1.06847	1.06847	-0.585743	0.585743	0.0055495	1
576	OG0003127	440.379	426.884	202.524	285.753	535.346	499.019	248.112	311.188	228.804	359.708	-1.18745	1.18745	0.244659	-0.244659	-0.785642	0.785642	-1.54955	1.54955	0.0242962	1
577	OG0003130	148.796	238.565	322.427	366.576	108.637	67.2867	214.035	233.048	346.785	419.57	-0.386182	0.386182	1.4166	-1.4166	-0.256298	0.256298	-0.572415	0.572415	0.88188	1
578	OG0003132	73.113	58.985	205.21	224.572	277.125	278.774	257.55	279.596	135.297	200.162	-0.416893	0.416893	-0.0274406	0.0274406	-0.379813	0.379813	-1.78933	1.78933	0.0549752	1
579	OG0003134	249.577	239.006	278.512	289.579	293.179	254.054	238.928	244.159	251.428	270.449	-0.480251	0.480251	1.76249	-1.76249	-0.266936	0.266936	-0.898486	0.898486	0.946689	1
580	OG0003135	218.491	173.872	144.862	164.077	145.969	174.372	86.1254	79.2348	69.7264	90.8624	-0.631012	0.631012	-0.899528	0.899528	0.422752	-0.422752	-1.33527	1.33527	0.0602166	1
581	OG0003137	189.378	211.439	160.977	173.814	151.703	136.359	90.0814	103.778	123.52	172.639	-0.407545	0.407545	0.566143	-0.566143	-0.750896	0.750896	-1.76276	1.76276	0.133862	1
582	OG0003138	231.06	191.776	213.74	166.17	143.393	195.166	119.421	115.837	375.876	315.081	1.12578	-1.12578	-1.3749	1.3749	0.136954	-0.136954	0.791059	-0.791059	0.680133	1
583	OG0003139	41.2688	39.1413	88.9369	89.1658	495.317	464.648	55.6321	57.5505	159.946	158.459	-0.0605092	0.0605092	1.50362	-1.50362	-0.797761	0.797761	0.219826	-0.219826	0.547297	1
584	OG0003140	153.221	209.934	125.431	128.101	269.068	255.076	111.015	138.582	168.082	233.84	-0.0881814	0.0881814	0.223546	-0.223546	-0.924814	0.924814	-1.36999	1.36999	0.0832754	1
585	OG0003143	99.0957	114.772	653.382	695.264	78.8361	76.8888	1396.63	2596.02	452.526	512.576	-0.207693	0.207693	0.0836298	-0.0836298	-2.00908	2.00908	-0.416136	0.416136	0.102778	1
586	OG0003144	518.462	722.288	543.277	559.689	526.739	420.326	459.473	550.096	448.606	615.994	-0.117142	0.117142	0.884536	-0.884536	-0.706651	0.706651	-1.23777	1.23777	0.395395	1
587	OG0003145	440.303	529.209	786.874	886.811	981.462	953.077	766.474	855.502	382.461	632.544	-0.459737	0.459737	0.112972	-0.112972	-0.422613	0.422613	-1.89704	1.89704	0.0710952	1
588	OG0003147	205.573	264.238	218.323	253.596	156.402	166.445	65.0268	71.195	83.1175	87.9227	-1.00305	1.00305	-0.41746	0.41746	-0.607673	0.607673	-0.377024	0.377024	0.00101244	1
589	OG0003148	45.7099	154.015	188.463	372.833	1938.21	1859.81	205.876	287.425	171.19	338.348	-0.950574	0.950574	0.0597398	-0.0597398	-0.4784	0.4784	-0.949373	0.949373	0.0143128	1
590	OG0003149	73.8797	51.7469	408.685	401.341	263.901	287.706	69.2308	81.139	254.432	184.397	0.0755959	-0.0755959	-0.359833	0.359833	-0.660317	0.660317	1.33072	-1.33072	0.765936	1
591	OG0003152	145.771	190.331	321.323	309.563	305.64	260.02	149.091	187.563	301.53	301.714	0.204233	-0.204233	0.883609	-0.883609	-1.25205	1.25205	-0.00334793	0.00334793	0.898594	1
592	OG0003153	558.926	608.978	414.056	469.479	200.687	216.986	312.937	324.449	272.667	295.305	-1.38662	1.38662	-0.862621	0.862621	-0.399257	0.399257	-0.881076	0.881076	0.000820051	1
593	OG0003154	257.798	307.44	93.8373	104.116	194.761	180.456	46.2366	48.238	117.981	119.187	-0.991642	0.991642	0.728134	-0.728134	-0.404595	0.404595	-0.0971702	0.0971702	0.478712	1
594	OG0003156	144.532	158.095	101.896	90.0349	97.4246	113.073	71.6209	83.5732	124.443	128.544	0.989601	-0.989601	-1.19046	1.19046	-1.23331	1.23331	-0.259557	0.259557	0.294852	1
595	OG0003162	62.795	66.3795	102.526	111.414	65.886	80.4182	68.1594	79.9753	60.722	84.9857	-0.408904	0.408904	-0.977613	0.977613	-0.785058	0.785058	-1.63895	1.63895	0.0019517	1
596	OG0003164	526.071	1198.6	625.024	773.664	265.546	269.778	186.591	207.875	257.895	283.817	-0.548997	0.548997	-0.0408455	0.0408455	-0.27873	0.27873	-0.2472	0.2472	0.00916979	1
597	OG0003165	83.4569	98.5401	124.325	107.766	230.604	233.581	32.473	41.9966	170.853	140.837	0.780232	-0.780232	-0.0701391	0.0701391	-1.39852	1.39852	1.05312	-1.05312	0.822811	1
598	OG0003166	40.0409	45.609	129.334	124.904	96.0098	75.922	58.3131	60.502	119.301	136.12	0.244504	-0.244504	1.6394	-1.6394	-0.258501	0.258501	-0.923932	0.923932	0.664223	1
599	OG0003172	258.329	388.177	101.104	95.7709	139.053	97.8098	32.5546	30.7863	91.891	87.9254	0.213192	-0.213192	1.37032	-1.37032	0.219706	-0.219706	0.173561	-0.173561	0.0539021	1
600	OG0003173	228.626	271.152	217.848	214.141	52.5195	103.572	71.3728	90.6599	126.985	136.294	0.0505382	-0.0505382	-1.92648	1.92648	-0.701113	0.701113	-0.208252	0.208252	0.0659114	1
601	OG0003175	165.307	170.01	201.26	236.913	459.947	468.743	213.706	228.186	282.602	361.846	-1.13563	1.13563	-0.132192	0.132192	-0.457351	0.457351	-1.71622	1.71622	0.0137951	1
602	OG0003176	515.209	510.666	369.186	365.535	496.328	411.669	397.257	461.786	1377.21	969.029	0.0498951	-0.0498951	0.936054	-0.936054	-0.754141	0.754141	1.7466	-1.7466	0.244023	1
603	OG0003178	305.756	334.767	368.401	421.33	218.983	161.092	385.545	423.148	355.327	449.232	-0.666315	0.666315	1.51429	-1.51429	-0.462279	0.462279	-1.16037	1.16037	0.657725	1
604	OG0003184	85.2285	35.593	370.608	213.446	942.823	766.491	58.2678	97.535	929.762	774.468	1.00338	-1.00338	0.384666	-0.384666	-0.939784	0.939784	0.33978	-0.33978	0.520219	1
605	OG0003185	84.0709	107.732	101.58	108.465	106.723	99.0238	65.1916	69.2898	115.903	105.026	-0.479318	0.479318	0.54717	-0.54717	-0.445613	0.445613	0.719893	-0.719893	0.717116	1
606	OG0003186	69.269	99.1737	158.288	148.435	127.096	147.513	131.04	133.716	188.861	231.167	0.309972	-0.309972	-0.717451	0.717451	-0.0975493	0.0975493	-0.971936	0.971936	0.123413	1
607	OG0003187	131.505	129.905	703.778	743.583	118.465	144.008	563.484	659.902	683.646	938.552	-0.287534	0.287534	-1.01746	1.01746	-0.823992	0.823992	-1.64288	1.64288	0.00310453	1
608	OG0003191	365.974	438.99	134.121	143.746	319.089	139.539	144.641	186.398	105.051	127.742	-0.169419	0.169419	1.91483	-1.91483	-0.616947	0.616947	-0.476737	0.476737	0.710272	1
609	OG0003192	655.952	767.479	351.337	471.212	672.684	620.195	361.889	469.271	238.044	558.801	-0.678267	0.678267	0.188951	-0.188951	-0.601287	0.601287	-1.87343	1.87343	0.0488566	1
610	OG0003194	731.457	1482.75	929.526	1587.46	1283.7	1210.59	643.757	893.375	331.777	667.571	-0.974786	0.974786	0.109304	-0.109304	-0.60558	0.60558	-1.25303	1.25303	0.0171289	1
611	OG0003195	54.5266	39.8868	110.426	120.802	125.49	123.408	69.5597	59.8757	102.973	98.6098	-0.530523	0.530523	0.0988621	-0.0988621	0.884547	-0.884547	0.255926	-0.255926	0.421648	1
612	OG0003198	1875.14	3010.42	1252.9	1311.79	2373.29	2104.56	433.264	637.899	1309.79	2118.43	-0.125649	0.125649	0.328421	-0.328421	-1.04546	1.04546	-1.29083	1.29083	0.0952696	1
613	OG0003200	77.8001	113.883	114.06	152.958	247.943	214.695	81.7623	103.833	353.734	356.771	-1.1211	1.1211	0.553064	-0.553064	-0.915155	0.915155	-0.0328937	0.0328937	0.218609	1
614	OG0003201	651.96	843.727	266.728	248.828	419.584	481.924	602.521	672.097	759.83	849.029	0.436445	-0.436445	-0.869241	0.869241	-0.686146	0.686146	-0.696916	0.696916	0.0759637	1
615	OG0003206	421.361	418.514	141.233	154.173	270.783	260.585	78.6263	85.581	290.45	278.199	-1.3766	1.3766	0.603118	-0.603118	-1.331	1.331	0.677007	-0.677007	0.41451	1
616	OG0003207	169.57	197.972	110.425	104.809	411.853	447.287	132.773	151.17	232.498	251.737	0.465594	-0.465594	-0.73602	0.73602	-1.15626	1.15626	-0.709023	0.709023	0.0734287	1
617	OG0003208	34.4512	67.8421	326.061	393.697	164.278	145.381	300.402	371.341	115.672	247.696	-0.389244	0.389244	0.252773	-0.252773	-0.437431	0.437431	-1.50501	1.50501	0.0901036	1
618	OG0003209	107.634	163.003	168.082	141.139	191.624	140.187	77.3068	75.4275	856.805	726.097	0.65169	-0.65169	1.15939	-1.15939	0.0920254	-0.0920254	0.617586	-0.617586	0.00644344	1
619	OG0003210	61.5397	34.6888	132.067	105.854	119.577	86.6229	113.406	117.847	168.542	167.026	0.686435	-0.686435	0.99571	-0.99571	-0.11965	0.11965	0.02813	-0.02813	0.0783926	1
620	OG0003211	206.613	205.799	88.1502	79.9553	57.7595	83.1786	42.8567	43.2671	86.3499	95.1383	0.535608	-0.535608	-1.98162	1.98162	-0.0523591	0.0523591	-0.532049	0.532049	0.230242	1
621	OG0003216	10853.6	16641.8	717.365	848.919	1310.41	1387.58	487.989	551.152	467.534	810.543	-0.498176	0.498176	-0.169647	0.169647	-0.360526	0.360526	-1.59184	1.59184	0.0273363	1
622	OG0003217	494.738	657.015	530.482	620.349	166.396	183.109	292.991	363.063	481.618	714.606	-0.594732	0.594732	-0.364189	0.364189	-0.813458	0.813458	-1.48339	1.48339	0.00309094	1
623	OG0003220	179.756	218.541	293.463	293.683	360.992	389.155	393.209	454.94	314.464	425.717	-0.00404176	0.00404176	-0.404416	0.404416	-0.784023	0.784023	-1.6191	1.6191	0.0278334	1
624	OG0003221	177.552	128.501	99.5244	87.4294	122.528	171.68	70.0542	63.4725	110.131	105.026	0.556686	-0.556686	-1.43756	1.43756	0.42414	-0.42414	0.204144	-0.204144	0.853685	1
625	OG0003227	215.205	330.647	176.299	159.045	420.877	429.014	471.809	538.707	395.732	627.75	0.339682	-0.339682	-0.0632041	0.0632041	-0.43707	0.43707	-1.49666	1.49666	0.187637	1
626	OG0003228	98.9644	117.172	116.268	102.553	153.278	196.938	86.7848	92.0351	129.987	125.069	0.797416	-0.797416	-1.58609	1.58609	-0.373553	0.373553	0.245277	-0.245277	0.549682	1
627	OG0003231	60.6203	76.5404	96.0489	86.5603	104.961	97.9609	37.9108	35.1225	127.447	122.397	0.794903	-0.794903	0.527754	-0.527754	0.584064	-0.584064	0.309206	-0.309206	0.000226093	0.436134
628	OG0003233	540.75	677.855	265.619	274.789	320.672	318.328	165.575	172.538	219.566	285.682	-0.206078	0.206078	0.0445654	-0.0445654	-0.250122	0.250122	-1.58928	1.58928	0.103504	1
629	OG0003235	1052.74	1303.99	162.718	165.819	129.553	132.631	75.5761	79.658	248.902	254.546	-0.179744	0.179744	-0.223602	0.223602	-0.500726	0.500726	-0.213454	0.213454	0.00180829	1
630	OG0003236	54.2258	160.231	566.344	464.438	116.688	117.577	417.875	378.403	395.96	420.11	0.413327	-0.413327	-0.0158687	0.0158687	0.207244	-0.207244	-0.123723	0.123723	0.204751	1
631	OG0003239	363.798	385.718	204.579	229.091	120.449	100.057	134.338	144.614	90.3534	157.32	-0.406345	0.406345	0.664851	-0.664851	-0.264816	0.264816	-1.94384	1.94384	0.249202	1
632	OG0003244	283.337	324.133	192.57	190.676	312.153	289.035	125.85	147.362	172.24	274.99	0.0411228	-0.0411228	0.319964	-0.319964	-0.655147	0.655147	-1.91167	1.91167	0.168121	1
633	OG0003246	127.982	196.733	354.811	499.024	182.093	165.489	262.251	343.599	178.934	280.073	-0.95008	0.95008	0.268706	-0.268706	-0.755287	0.755287	-1.23945	1.23945	0.0278957	1
634	OG0003248	65.877	92.7397	191.306	199.887	96.3228	76.4576	129.558	134.349	161.851	190.007	-0.209947	0.209947	1.10052	-1.10052	-0.173767	0.173767	-0.765962	0.765962	0.966329	1
635	OG0003249	40.4105	36.3471	109.477	74.2194	169.233	159.886	55.3016	52.6811	202.943	170.231	1.84459	-1.84459	0.272948	-0.272948	0.233225	-0.233225	0.842462	-0.842462	0.0238042	1
636	OG0003251	149.511	181.91	76.302	78.5648	80.9595	104.707	70.1366	74.2628	56.5684	75.8968	-0.141126	0.141126	-1.23537	1.23537	-0.275999	0.275999	-1.40933	1.40933	0.0157197	1
637	OG0003252	138.921	115.899	536.169	356.149	599.442	804.226	329.339	336.51	676.253	705.784	1.60929	-1.60929	-1.16376	1.16376	-0.0859131	0.0859131	-0.170448	0.170448	0.911244	1
638	OG0003253	759.09	691.851	833.003	755.752	1076.69	1228.73	790.293	1024.34	624.305	846.888	0.468916	-0.468916	-0.636005	0.636005	-1.24382	1.24382	-1.45904	1.45904	0.0572193	1
639	OG0003255	562.432	529.9	642.169	633.909	233.004	167.643	447.605	496.673	365.717	468.209	0.0644852	-0.0644852	1.62511	-1.62511	-0.517639	0.517639	-1.22429	1.22429	0.976644	1
640	OG0003256	343.335	265.161	227.165	172.684	91.825	110.513	72.6091	87.592	228.804	265.102	1.20278	-1.20278	-0.81531	0.81531	-0.825601	0.825601	-0.648743	0.648743	0.465482	1
641	OG0003258	92.5241	105.354	498.412	430.888	193.023	234.075	116.704	106.739	187.248	168.9	1.00838	-1.00838	-1.33391	1.33391	0.618927	-0.618927	0.71495	-0.71495	0.530042	1
642	OG0003259	316.043	327.221	331.907	327.295	96.4805	102.778	126.756	138.583	314.459	298.777	0.234943	-0.234943	-1.06138	1.06138	-1.49676	1.49676	0.858748	-0.858748	0.382437	1
643	OG0003260	1179.48	2244.4	779.134	1435.02	183.115	196.109	593.812	512.329	351.402	398.993	-1.42262	1.42262	-0.164555	0.164555	0.353772	-0.353772	-0.304576	0.304576	0.196086	1
644	OG0003261	41.0183	45.3263	71.0873	86.0354	140.32	160.927	33.9557	38.5056	126.526	197.225	-0.774781	0.774781	-0.557089	0.557089	-0.511362	0.511362	-1.77842	1.77842	0.0050003	1
645	OG0003262	235.712	358.842	453.863	357.366	689.222	632.854	222.443	281.818	465.689	644.054	0.803789	-0.803789	0.288101	-0.288101	-0.795637	0.795637	-1.08607	1.08607	0.554199	1
646	OG0003264	159.397	171.674	111.215	117.845	139.322	116.333	55.7961	60.722	186.784	215.932	-0.466549	0.466549	1.44921	-1.44921	-0.681345	0.681345	-1.1665	1.1665	0.613333	1
647	OG0003266	58.0835	77.1051	380.878	340.156	513.434	535.923	237.277	273.463	310.769	387.777	0.594451	-0.594451	-0.225571	0.225571	-0.745732	0.745732	-1.16032	1.16032	0.200699	1
648	OG0003269	67.2439	64.2914	90.2023	80.8262	108.375	109.999	55.9617	59.3468	86.119	81.5089	1.6154	-1.6154	-0.219128	0.219128	-0.865027	0.865027	0.81038	-0.81038	0.42052	1
649	OG0003270	92.0857	107.859	256.705	265.935	244.798	212.86	92.6355	93.4104	181.476	232.498	-0.229645	0.229645	0.907441	-0.907441	-0.0541568	0.0541568	-1.60269	1.60269	0.528107	1
650	OG0003271	184.947	227.988	306.315	324.167	945.844	959.817	225.574	250.715	252.121	280.067	-0.457129	0.457129	-0.118378	0.118378	-0.852219	0.852219	-0.84782	0.84782	0.00385072	1
651	OG0003274	92.828	95.5484	302.684	276.713	438.915	454.824	306.508	331.117	445.602	393.105	1.06695	-1.06695	-0.423709	0.423709	-0.91871	0.91871	1.48993	-1.48993	0.485833	1
652	OG0003277	24.5777	38.8845	129.54	128.971	72.7193	101.639	112.084	130.648	99.5078	133.087	0.0143876	-0.0143876	-1.08568	1.08568	-0.500592	0.500592	-0.944975	0.944975	0.0115569	1
653	OG0003278	150.565	82.6178	339.328	314.433	96.9978	67.7316	83.9826	80.1869	105.282	95.4055	0.232336	-0.232336	1.08399	-1.08399	0.141068	-0.141068	0.300277	-0.300277	0.0288195	1
654	OG0003282	63.044	79.1023	276.3	287.843	84.5288	44.4568	154.945	159.317	274.974	280.073	-0.130879	0.130879	1.98728	-1.98728	-0.0889921	0.0889921	-0.0587657	0.0587657	0.289677	1
655	OG0003283	115.407	143.406	97.1516	99.0768	123.082	125.389	65.1924	63.8967	52.6411	72.9598	-0.106547	0.106547	-0.100829	0.100829	0.109002	-0.109002	-1.75679	1.75679	0.181386	1
656	OG0003286	69.947	83.1825	106.791	104.987	81.9863	85.2111	82.912	81.8795	108.512	110.636	0.201494	-0.201494	-0.456056	0.456056	0.148147	-0.148147	-0.229112	0.229112	0.477856	1
657	OG0003287	95.0333	104.754	147.075	140.097	168.651	178.582	119.175	130.649	194.634	212.992	0.579402	-0.579402	-0.68201	0.68201	-1.09524	1.09524	-1.07399	1.07399	0.0876586	1
658	OG0003289	45.0929	53.701	572.78	583.744	1407.63	1390.91	343.597	390.038	348.863	408.082	-0.150533	0.150533	0.0948665	-0.0948665	-1.00524	1.00524	-1.24234	1.24234	0.0456737	1
659	OG0003291	206.753	234.425	241.343	279.206	201.527	198.668	210.174	248.008	102.971	113.848	-1.13102	1.13102	0.11108	-0.11108	-1.28402	1.28402	-0.780066	0.780066	0.0129746	1
660	OG0003293	29.3228	55.0056	141.386	140.097	92.2311	125.312	41.702	38.0846	78.7308	66.8106	0.027509	-0.027509	-0.913621	0.913621	0.272402	-0.272402	0.492077	-0.492077	0.893976	1
661	OG0003294	671.709	781.922	146.917	170.863	224.365	204.835	233.405	233.366	293.222	327.11	-1.24512	1.24512	0.7519	-0.7519	0.00136921	-0.00136921	-0.902652	0.902652	0.316561	1
662	OG0003295	840.177	857.729	531.901	522.838	321.081	320.05	164.008	176.876	359.255	229.828	0.0816106	-0.0816106	0.0152782	-0.0152782	-0.358529	0.358529	2.08685	-2.08685	0.286791	1
663	OG0003298	260.88	249.923	411.312	332.868	383.912	445.131	221.372	221.201	369.644	400.056	1.64022	-1.64022	-1.14901	1.14901	0.00602647	-0.00602647	-0.614815	0.614815	0.94741	1
664	OG0003299	57.3184	108.81	263.659	313.218	82.8786	53.3503	139.367	162.807	174.544	220.745	-0.441855	0.441855	1.11483	-1.11483	-0.398977	0.398977	-0.601132	0.601132	0.782848	1
665	OG0003304	75.7551	144.109	334.375	373.913	279.913	279.521	123.459	128.637	151.23	149.92	-0.374068	0.374068	0.00470309	-0.00470309	-0.137618	0.137618	0.0291441	-0.0291441	0.117544	1
666	OG0003305	76.7676	108.182	151.026	144.441	208.159	188.182	120.492	133.714	179.398	197.225	0.246331	-0.246331	0.557116	-0.557116	-0.574904	0.574904	-0.523194	0.523194	0.724411	1
667	OG0003306	135.14	151.817	119.744	93.5112	166.262	149.243	43.0215	37.1325	79.1925	96.7391	1.36093	-1.36093	0.59678	-0.59678	0.812858	-0.812858	-1.10343	1.10343	0.310018	1
668	OG0003307	26.4195	94.2378	97.3111	126.364	86.8384	69.9454	63.8721	87.6989	31.864	68.684	-0.388421	0.388421	0.322207	-0.322207	-0.470087	0.470087	-1.09506	1.09506	0.0938999	1
669	OG0003308	43.3443	26.9011	175.984	156.782	64.4842	84.3706	170.932	163.865	218.876	210.854	0.441812	-0.441812	-1.02286	1.02286	0.161621	-0.161621	0.142924	-0.142924	0.773838	1
670	OG0003309	763.524	588.984	304.101	390.391	287.127	309.706	167.142	163.443	213.566	204.44	-1.42681	1.42681	-0.434439	0.434439	0.128495	-0.128495	0.250694	-0.250694	0.219662	1
671	OG0003310	155.704	245.14	186.886	267.153	169.13	141.728	188.158	240.243	235.497	413.691	-0.886562	0.886562	0.442059	-0.442059	-0.609719	0.609719	-1.37653	1.37653	0.0666081	1
672	OG0003311	249.244	278.068	300.628	367.968	1451.77	1377.56	62.307	79.658	388.11	668.905	-0.677924	0.677924	0.176535	-0.176535	-0.82265	0.82265	-1.78805	1.78805	0.0339983	1
673	OG0003313	39.2543	40.0519	356.152	423.285	270.975	210.918	274.741	320.283	144.641	156.609	-1.04641	1.04641	1.51409	-1.51409	-0.929873	0.929873	-0.482684	0.482684	0.595395	1
674	OG0003315	682.926	1123.74	296.36	405.688	831.055	764.406	281.7	342.328	323.002	462.065	-0.929376	0.929376	0.249305	-0.249305	-0.579823	0.579823	-1.05714	1.05714	0.0317422	1
675	OG0003319	37.7225	30.687	20.2098	41.7037	425.923	222.042	115.549	165.663	140.635	195.49	-1.3711	1.3711	1.24269	-1.24269	-0.703826	0.703826	-0.644552	0.644552	0.388695	1
676	OG0003327	251.336	233.654	149.129	160.258	92.5285	141.297	85.4661	94.4682	242.657	136.026	-0.213367	0.213367	-1.23706	1.23706	-0.29674	0.29674	1.67013	-1.67013	0.965781	1
677	OG0003329	205.67	284.259	155.29	179.55	142.118	152.77	157.25	181.426	64.1875	106.894	-0.486781	0.486781	-0.242689	0.242689	-0.479578	0.479578	-1.67712	1.67712	0.0197152	1
678	OG0003331	394.379	434.549	891.454	817.806	336.553	410.839	568.179	649.747	942.458	1118.94	0.567961	-0.567961	-1.31016	1.31016	-0.882802	0.882802	-1.12851	1.12851	0.0631941	1
679	OG0003333	123.432	149.171	167.612	187.721	275.126	254.68	123.789	141.544	207.332	182.527	-0.806967	0.806967	0.550265	-0.550265	-0.954136	0.954136	0.907257	-0.907257	0.82738	1
680	OG0003335	177.8	162.411	196.365	210.667	69.1888	113.391	116.373	117	140.607	156.871	-0.292608	0.292608	-2.01611	2.01611	-0.0223647	0.0223647	-0.455297	0.455297	0.0705863	1
681	OG0003338	35.0193	53.3856	152.29	155.739	148.85	208.532	145.549	169.154	162.541	233.84	-0.0719019	0.0719019	-1.07224	1.07224	-0.481612	0.481612	-1.15492	1.15492	0.00858493	1
682	OG0003340	142.811	153.387	205.368	183.376	115.804	129.992	116.455	129.8	196.019	207.645	1.11549	-1.11549	-1.13822	1.13822	-1.0686	1.0686	-0.567898	0.567898	0.307134	1
683	OG0003348	7370.71	8926.74	6480.77	6933	4440.46	4424.9	6716.55	7930.89	2148.82	2698.61	-0.41295	0.41295	0.021493	-0.021493	-1.01549	1.01549	-1.38927	1.38927	0.0196672	1
684	OG0003351	131.439	169.52	238.858	205.624	120.7	132.299	172.91	199.304	272.21	383.226	0.661922	-0.661922	-0.405881	0.405881	-0.627741	0.627741	-1.49945	1.49945	0.187162	1
685	OG0003352	115.982	138.78	123.063	123.931	158.823	164.053	85.1356	82.0911	144.763	160.075	-0.0706499	0.0706499	-0.325584	0.325584	0.365962	-0.365962	-1.00972	1.00972	0.248621	1
686	OG0003353	1299.06	2012.86	1422.25	1794.3	906.182	854.382	854.644	1208.94	380.727	711.132	-0.575555	0.575555	0.146402	-0.146402	-0.854323	0.854323	-1.50576	1.50576	0.0279817	1
687	OG0003358	171.966	251.268	365.234	423.24	355.19	412.21	368.501	426.172	115.21	216.196	-0.411024	0.411024	-0.415127	0.415127	-0.405467	0.405467	-1.70248	1.70248	0.018327	1
688	OG0003359	232.783	242.361	301.417	300.352	102.535	118.03	148.118	163.391	214.88	265.77	0.0272513	-0.0272513	-1.08232	1.08232	-0.755375	0.755375	-1.63119	1.63119	0.0126749	1
689	OG0003360	286.39	368.811	207.578	237.954	375.545	380.195	341.464	390.16	223.032	324.699	-0.593459	0.593459	-0.053554	0.053554	-0.579354	0.579354	-1.61566	1.61566	0.0218178	1
690	OG0003361	243.051	267.916	234.593	230.48	335.428	296.929	126.509	128.003	124.905	136.291	0.208619	-0.208619	1.43609	-1.43609	-0.138474	0.138474	-1.02826	1.02826	0.751797	1
691	OG0003362	374.476	421.134	151.024	182.854	0	89.32	89.3397	85.2647	127.216	118.656	-0.200806	0.200806	-2.10633	2.10633	0.0491579	-0.0491579	0.073335	-0.073335	0.190719	1
692	OG0003365	401.664	546.086	646.433	715.772	391.793	454.574	261.836	313.977	425.518	478.102	-0.521333	0.521333	-0.7597	0.7597	-0.927419	0.927419	-0.595999	0.595999	3.40685e-05	0.066604
693	OG0003366	267.326	338.788	424.165	446.186	430.858	328.364	474.145	528.728	285.624	343.837	-0.255055	0.255055	1.36091	-1.36091	-0.548671	0.548671	-0.93228	0.93228	0.801381	1
694	OG0003367	68.5237	72.5855	196.678	150.523	298.548	205.052	85.5469	93.5595	114.284	130.422	1.15783	-1.15783	1.61704	-1.61704	-0.389651	0.389651	-0.574399	0.574399	0.287837	1
695	OG0003369	144.548	196.824	504.889	644.336	498.862	336.057	467.926	624.987	274.978	524.591	-0.583935	0.583935	0.938392	-0.938392	-0.69158	0.69158	-1.50235	1.50235	0.248697	1
696	OG0003371	1395.55	1786.77	780.461	839.693	1098.63	1100.36	963.067	1143.25	1202.44	1452.19	-0.429404	0.429404	-0.0092425	0.0092425	-1.00472	1.00472	-1.10505	1.10505	0.0126972	1
697	OG0003373	353.651	488.115	321.322	392.476	53.779	79.2015	105.741	111.5	205.947	175.311	-0.751586	0.751586	-1.44138	1.44138	-0.199889	0.199889	0.605842	-0.605842	0.194919	1
698	OG0003376	21.2163	38.6529	105.371	78.7386	251.556	286.173	44.7531	38.8251	155.386	146.716	0.901952	-0.901952	-0.401398	0.401398	0.442248	-0.442248	0.17894	-0.17894	0.195063	1
699	OG0003380	186.623	189.629	163.977	144.963	137.309	127.067	78.3774	71.7239	332.468	331.381	1.52596	-1.52596	0.960569	-0.960569	1.09902	-1.09902	0.040608	-0.040608	0.00635946	1
700	OG0003390	116.636	87.2589	278.512	248.209	127.313	89.6139	197.965	238.557	352.326	332.449	0.483316	-0.483316	1.45999	-1.45999	-0.781212	0.781212	0.24385	-0.24385	0.32152	1
701	OG0003392	237.311	326.005	400.665	349.036	531.565	656.296	305.964	303.366	288.369	266.438	0.711643	-0.711643	-1.08511	1.08511	0.0440729	-0.0440729	0.408495	-0.408495	0.945548	1
702	OG0003393	1193.49	1882.72	1644.9	2087.45	749.257	770.91	1228.38	1417.82	949.537	1259.18	-0.841987	0.841987	-0.101146	0.101146	-0.508355	0.508355	-0.995507	0.995507	0.00475149	1
703	OG0003397	293.84	200.816	1064.75	598.624	350.023	156.469	30.7406	241.195	515.56	385.831	0.633845	-0.633845	0.864362	-0.864362	-1.75049	1.75049	0.325529	-0.325529	0.966966	1
704	OG0003401	399.253	242.57	57.187	33.2006	693.492	317.501	51.7404	55.842	438.674	335.122	1.04954	-1.04954	1.47086	-1.47086	-0.150787	0.150787	0.529265	-0.529265	0.0262409	1
705	OG0003402	143.051	174.196	492.251	576.721	175.787	119.648	46.9775	46.8639	94.8925	122.394	-0.642767	0.642767	1.54567	-1.54567	0.00985049	-0.00985049	-1.02954	1.02954	0.944324	1
706	OG0003405	144.745	193.242	86.5704	99.7704	99.3488	117.245	42.0325	49.1912	77.8072	67.6123	-0.720427	0.720427	-0.840306	0.840306	-0.798088	0.798088	0.712995	-0.712995	0.172339	1
707	OG0003407	164.644	216.253	53.0797	58.0545	54.348	130.258	72.8555	90.7667	159.078	148.589	-0.210973	0.210973	-1.93797	1.93797	-0.515913	0.515913	0.160663	-0.160663	0.1018	1
708	OG0003408	38.6893	37.7891	44.0751	47.9732	47.6156	80.0447	40.3018	42.2092	53.7955	77.233	-0.285527	0.285527	-1.71272	1.71272	-0.155866	0.155866	-1.20602	1.20602	0.0189921	1
709	OG0003409	320.903	512.592	261.766	339.8	95.9581	112.309	526.149	630.917	433.363	250.409	-0.697424	0.697424	-0.422112	0.422112	-0.486822	0.486822	1.43857	-1.43857	0.908887	1
710	OG0003410	52.277	40.9612	438.065	472.609	187.633	192.381	107.636	123.347	156.769	205.509	-0.407188	0.407188	-0.134131	0.134131	-0.730147	0.730147	-1.44423	1.44423	0.014559	1
711	OG0003413	484.435	727.794	166.506	222.311	112.242	125.891	99.3945	110.231	153.998	161.684	-1.1723	1.1723	-0.468165	0.468165	-0.422221	0.422221	-0.198866	0.198866	0.0090178	1
712	OG0003421	181.187	207.185	234.876	251.967	741.185	719.614	168.296	179.839	258.128	292.096	-0.715218	0.715218	0.300838	-0.300838	-0.675508	0.675508	-1.25771	1.25771	0.0429653	1
713	OG0003422	103.294	113.882	109.951	98.0357	211.795	230.656	71.8657	71.9366	103.435	119.992	1.06719	-1.06719	-0.794083	0.794083	-0.00918028	0.00918028	-1.38045	1.38045	0.484077	1
714	OG0003423	49.9236	70.6668	282.3	253.076	285.766	268.419	169.366	166.615	301.989	328.708	0.615353	-0.615353	0.352878	-0.352878	0.0923018	-0.0923018	-0.477576	0.477576	0.41156	1
715	OG0003424	88.3181	105.681	86.2545	86.3865	170.454	175.322	58.2686	55.8558	85.6572	89.2589	-0.0170315	0.0170315	-0.313419	0.313419	0.470666	-0.470666	-0.458408	0.458408	0.60317	1
716	OG0003426	334.691	439.901	212.159	196.236	402.597	307.253	101.043	114.25	200.867	225.82	0.389049	-0.389049	1.34028	-1.34028	-0.612161	0.612161	-0.583545	0.583545	0.698856	1
717	OG0003427	281.984	333.081	409.821	465.098	553.632	586.551	469.388	567.862	475.155	605.568	-0.713331	0.713331	-0.325976	0.325976	-1.07188	1.07188	-1.36244	1.36244	0.00155034	1
718	OG0003429	111.793	128.077	74.4047	76.6511	92.5466	134.996	39.7248	40.1992	79.4234	63.0692	-0.137234	0.137234	-1.72159	1.72159	-0.054777	0.054777	1.05915	-1.05915	0.616303	1
719	OG0003431	126.607	162.955	161.765	137.139	63.1185	98.1944	89.2581	72.8876	99.2793	97.2762	0.617435	-0.617435	-1.62955	1.62955	0.756635	-0.756635	0.0763725	-0.0763725	0.911814	1
720	OG0003435	977.678	853.645	990.82	1056.63	406.877	340.855	867.602	1020.85	462.888	951.057	-0.182744	0.182744	0.502026	-0.502026	-0.461389	0.461389	-1.96301	1.96301	0.202247	1
721	OG0003436	135.038	166.415	131.277	151.915	390.96	330.514	196.812	226.015	196.247	261.628	-0.703247	0.703247	0.808488	-0.808488	-0.666491	0.666491	-1.37793	1.37793	0.187575	1
722	OG0003437	180.524	198.405	572.423	610.901	188.678	144.826	310.547	313.873	485.773	525.398	-0.463608	0.463608	1.8747	-1.8747	-0.0759377	0.0759377	-0.558718	0.558718	0.647064	1
723	OG0003439	158.648	156.198	215.432	168.916	107.359	269.149	48.2138	61.8867	225.574	203.906	0.550716	-0.550716	-1.95536	1.95536	-0.565096	0.565096	0.229576	-0.229576	0.312775	1
724	OG0003441	102.294	112.483	390.829	302.958	466.209	573.282	150.162	144.928	364.563	372.007	1.56911	-1.56911	-1.27612	1.27612	0.219764	-0.219764	-0.125206	0.125206	0.822821	1
725	OG0003443	436.812	587.667	121.876	129.908	112.596	122.002	124.416	119.393	84.9646	89.7854	-0.423826	0.423826	-0.532667	0.532667	0.27374	-0.27374	-0.366519	0.366519	0.0876176	1
726	OG0003448	54.4319	56.8866	131.559	107.043	296.968	332.102	48.5409	49.8249	143.826	151.778	1.77629	-1.77629	-0.965538	0.965538	-0.225648	0.225648	-0.465059	0.465059	0.946098	1
727	OG0003449	121.311	140.93	44.391	47.9749	75.5074	220.131	29.4228	26.4469	54.2573	42.2243	-0.159953	0.159953	-2.01662	2.01662	0.219576	-0.219576	0.514132	-0.514132	0.40446	1
728	OG0003452	102.955	141.634	575.428	501.463	298.75	385.466	110.52	118.165	133.912	140.3	0.668891	-0.668891	-1.23425	1.23425	-0.325554	0.325554	-0.226871	0.226871	0.348869	1
729	OG0003453	383.64	202.125	118.165	119.761	304.518	372.167	94.2847	88.6499	173.621	100.483	-0.0336973	0.0336973	-0.502366	0.502366	0.154783	-0.154783	1.34082	-1.34082	0.420188	1
730	OG0003454	38.9901	28.8905	319.721	343.453	122.784	297.179	138.213	166.086	152.382	209.515	-0.158574	0.158574	-1.84012	1.84012	-0.405898	0.405898	-0.699563	0.699563	0.0254808	1
731	OG0003456	96.3666	159.479	349.604	366.055	324.379	371.961	372.442	417.332	517.64	483.441	-0.183721	0.183721	-0.546134	0.546134	-0.454279	0.454279	0.273031	-0.273031	0.130232	1
732	OG0003460	203.468	176.105	561.76	585.694	174.383	147.565	438.869	549.672	321.531	446.332	-0.194881	0.194881	0.778274	-0.778274	-1.04724	1.04724	-1.51854	1.51854	0.214752	1
733	OG0003463	235.005	231.602	212.319	207.189	238.965	273.613	117.937	123.983	287.908	227.69	0.188017	-0.188017	-1.03926	1.03926	-0.384216	0.384216	1.79566	-1.79566	0.754953	1
734	OG0003466	111.245	118.096	63.8204	72.3057	145.281	139.245	39.0655	54.4806	96.5087	114.912	-0.661493	0.661493	0.225105	-0.225105	-1.74871	1.74871	-0.923715	0.923715	0.0354051	1
735	OG0003467	43.358	59.6702	290.2	365.537	226.763	259.003	209.585	220.355	279.37	375.203	-0.957887	0.957887	-0.553371	0.553371	-0.208868	0.208868	-1.22067	1.22067	0.00343896	1
736	OG0003468	383.6	380.432	487.034	447.055	370.962	397.518	566.482	614.559	649.702	652.077	1.32386	-1.32386	-1.06885	1.06885	-1.2591	1.2591	-0.0564234	0.0564234	0.549717	1
737	OG0003471	75.9032	85.7459	261.92	265.415	281.814	288.192	142.251	140.698	208.955	257.889	-0.115221	0.115221	-0.19448	0.19448	0.0953892	-0.0953892	-1.82198	1.82198	0.154387	1
738	OG0003478	34.1733	26.4636	119.745	137.316	241.231	235.882	94.2855	97.9592	112.67	141.906	-0.780463	0.780463	0.128002	-0.128002	-0.218193	0.218193	-1.31123	1.31123	0.0506708	1
739	OG0003479	43.0602	78.1401	388.145	360.147	216.065	236.772	79.4497	82.8316	67.4175	70.2847	0.267362	-0.267362	-0.326746	0.326746	-0.148914	0.148914	-0.148783	0.148783	0.355241	1
740	OG0003485	353.601	410.868	541.699	567.334	480.815	465.829	168.79	172.221	213.799	249.869	-0.437706	0.437706	0.299759	-0.299759	-0.190512	0.190512	-1.47309	1.47309	0.139237	1
741	OG0003487	220.501	183.948	191.94	220.053	254.792	54.9983	127.004	112.451	224.646	277.398	-0.217359	0.217359	2.05435	-2.05435	0.193594	-0.193594	-0.334701	0.334701	0.321601	1
742	OG0003489	178.085	302.359	276.616	277.758	255.472	452.393	161.702	167.144	191.401	203.639	-0.0114524	0.0114524	-1.54691	1.54691	-0.0920341	0.0920341	-0.172256	0.172256	0.128114	1
743	OG0003490	195.699	180.212	388.366	255.494	136.171	164.207	267.553	253.281	489.472	475.157	1.88444	-1.88444	-0.852265	0.852265	0.250234	-0.250234	0.135513	-0.135513	0.410526	1
744	OG0003493	644.284	781.532	137.122	171.728	343.567	370.327	67.0048	88.0163	209.408	270.986	-0.986713	0.986713	-0.33009	0.33009	-1.19359	1.19359	-1.12881	1.12881	0.000632261	1
745	OG0003495	114.159	200.09	100.472	149.308	198.38	190.615	97.9934	111.394	87.966	128.544	-1.06165	1.06165	0.108381	-0.108381	-0.347521	0.347521	-1.01768	1.01768	0.0269433	1
746	OG0003496	108.59	116.45	55.6073	65.181	108.916	120.261	37.1699	32.7941	79.8852	79.6382	-1.42784	1.42784	-0.891764	0.891764	1.1267	-1.1267	0.0278883	-0.0278883	0.489851	1
747	OG0003498	308.042	342.534	160.188	170.34	120.394	131.692	82.2543	99.0499	231.051	229.767	-0.543823	0.543823	-0.793579	0.793579	-1.64035	1.64035	0.0493231	-0.0493231	0.025501	1
748	OG0003499	442.154	404.667	301.101	274.45	493.685	179.871	232.249	252.726	256.914	296.973	0.205629	-0.205629	2.069	-2.069	-0.187503	0.187503	-0.321175	0.321175	0.30271	1
749	OG0003502	74.2966	35.1185	142.424	139.929	129.413	130.574	103.432	97.6419	85.4263	90.5952	0.0519953	-0.0519953	-0.0262749	0.0262749	0.169423	-0.169423	-0.172765	0.172765	0.915821	1
750	OG0003505	205.693	223.696	249.601	269.682	786.287	762.533	209.03	237.125	264.591	267.24	-0.948615	0.948615	0.376209	-0.376209	-1.54466	1.54466	-0.122176	0.122176	0.113202	1
751	OG0003509	613.927	533.54	752.12	707.433	189.195	177.448	496.725	503.76	1404.23	1072.72	0.412141	-0.412141	0.431294	-0.431294	-0.0946504	0.0946504	1.80162	-1.80162	0.0684512	1
752	OG0003519	275.046	330.006	212.158	192.068	94.6442	113.784	89.0092	90.1288	236.331	200.178	0.653163	-0.653163	-1.20689	1.20689	-0.0821445	0.0821445	1.08852	-1.08852	0.760675	1
753	OG0003522	215.07	254.083	250.549	255.509	347.418	233.866	269.75	260.555	299.685	239.984	-0.0865632	0.0865632	1.72499	-1.72499	0.153114	-0.153114	0.976872	-0.976872	0.055436	1
754	OG0003529	40.4532	41.9092	144.705	131.407	272.746	204.78	99.889	110.442	185.396	272.587	0.411485	-0.411485	1.21599	-1.21599	-0.428656	0.428656	-1.6265	1.6265	0.811795	1
755	OG0003530	178.386	227.34	198.104	266.632	117.477	136.834	95.6033	125.888	71.3448	130.85	-0.814739	0.814739	-0.42056	0.42056	-0.755485	0.755485	-1.62608	1.62608	0.00245416	1
756	OG0003531	47.0203	33.5834	349.124	362.928	715.75	1002.59	106.564	310.485	725.662	733.845	-0.0756982	0.0756982	-0.6518	0.6518	-1.90925	1.90925	-0.0218915	0.0218915	0.0758602	1
757	OG0003532	98.9659	254.271	109.162	103.073	8.31269	99.8121	68.4883	70.9834	108.517	77.7675	0.0628517	-0.0628517	-1.85371	1.85371	-0.0391886	0.0391886	0.361582	-0.361582	0.341591	1
758	OG0003533	108.128	132.063	201.591	215.118	139.932	115.287	122.635	172.537	81.9654	141.638	-0.198703	0.198703	0.591074	-0.591074	-1.03481	1.03481	-1.63349	1.63349	0.148786	1
759	OG0003534	105.168	133.252	66.8251	66.5733	212.545	291.71	45.0267	44.5905	224.648	145.113	0.0137509	-0.0137509	-1.14353	1.14353	0.0354545	-0.0354545	1.56677	-1.56677	0.773945	1
760	OG0003539	589.396	687.085	693.985	601.056	97.1013	129.852	406.396	430.661	480.468	558.267	0.778016	-0.778016	-1.5646	1.5646	-0.314301	0.314301	-0.812058	0.812058	0.217807	1
761	OG0003542	318.682	331.101	876.446	904.714	237.864	386.018	496.892	557.077	449.987	653.405	-0.109655	0.109655	-1.64081	1.64081	-0.394555	0.394555	-1.27381	1.27381	0.015382	1
762	OG0003545	129.174	168.323	170.455	143.748	192.927	149.205	91.0712	103.672	234.345	312.406	0.704851	-0.704851	1.05971	-1.05971	-0.536533	0.536533	-1.1839	1.1839	0.977263	1
763	OG0003554	127.808	144.702	72.1947	72.6568	129.985	133.335	38.1589	31.8431	86.1167	94.6038	-0.0564762	0.0564762	-0.225191	0.225191	1.59709	-1.59709	-0.831308	0.831308	0.752943	1
764	OG0003555	393.078	495.596	368.398	365.709	705.169	676.091	402.029	504.289	321.388	484.778	0.0298959	-0.0298959	0.171796	-0.171796	-0.920763	0.920763	-1.65395	1.65395	0.0981279	1
765	OG0003556	283.899	394.182	605.359	625.564	260.057	349.653	142.251	163.019	313.071	352.49	-0.14655	0.14655	-1.31201	1.31201	-0.607395	0.607395	-0.528794	0.528794	0.00922103	1
766	OG0003560	101.753	124.95	73.46	66.0483	57.5526	75.2216	90.8232	100.605	241.733	166.489	0.433504	-0.433504	-1.08586	1.08586	-0.416953	0.416953	1.50401	-1.50401	0.792746	1
767	OG0003561	868.096	1035.78	238.385	251.859	602.112	614.968	64.8619	65.1651	150.535	210.854	-0.305238	0.305238	-0.117308	0.117308	-0.0258937	0.0258937	-1.85358	1.85358	0.107224	1
768	OG0003563	296.933	346.072	190.802	195.621	130.476	77.2761	72.2786	67.9431	108.515	106.894	-0.0981882	0.0981882	2.01631	-2.01631	0.243454	-0.243454	0.0592266	-0.0592266	0.161638	1
769	OG0003564	110.113	74.4789	325.587	313.912	256.387	225.39	218.404	198.034	599.139	553.459	0.181162	-0.181162	0.638431	-0.638431	0.485377	-0.485377	0.393267	-0.393267	0.000757716	1
770	OG0003567	61.364	69.6648	86.256	83.084	128.257	132.533	25.6324	30.1505	102.973	85.253	0.28058	-0.28058	-0.245575	0.245575	-1.21321	1.21321	1.41018	-1.41018	0.885656	1
771	OG0003569	117.653	137.973	147.865	171.556	127.212	136.144	63.6248	63.5772	109.438	122.397	-1.24021	1.24021	-0.567128	0.567128	0.00625961	-0.00625961	-0.93466	0.93466	0.0112556	1
772	OG0003571	135.16	133.902	37.4385	38.5871	193.463	194.084	49.1203	48.8738	86.5761	82.0434	-1.02293	1.02293	-0.108582	0.108582	0.170324	-0.170324	1.82008	-1.82008	0.626719	1
773	OG0003572	62.1047	45.6534	164.294	254.294	59.2674	87.098	101.455	132.339	151.228	313.475	-0.921387	0.921387	-0.814836	0.814836	-0.566094	0.566094	-1.4962	1.4962	0.000486142	0.932421
774	OG0003575	96.3895	97.3761	176.616	152.96	191.983	192.37	66.4287	54.1643	191.861	207.917	1.1632	-1.1632	-0.0163187	0.0163187	1.64811	-1.64811	-0.650871	0.650871	0.201007	1
775	OG0003577	87.8782	96.4037	103.158	92.6474	73.1796	95.4999	84.1474	75.1091	103.673	102.621	0.709214	-0.709214	-1.74831	1.74831	0.749844	-0.749844	0.0673697	-0.0673697	0.8978	1
776	OG0003579	184.184	202.097	352.441	314.607	682.476	720.677	316.398	348.782	501.704	458.858	1.17596	-1.17596	-0.564457	0.564457	-1.00938	1.00938	0.924813	-0.924813	0.742115	1
777	OG0003580	151.475	207.539	469.659	539.872	328.907	760.791	285.078	336.51	396.062	337.466	-0.330296	0.330296	-1.88218	1.88218	-0.392941	0.392941	0.379363	-0.379363	0.148847	1
778	OG0003581	240.024	284.787	61.6087	56.6623	99.9256	81.1351	119.751	132.658	96.2801	146.451	0.347638	-0.347638	0.862626	-0.862626	-0.425038	0.425038	-1.71806	1.71806	0.5782	1
779	OG0003582	26.1034	58.713	100.788	96.1202	320.362	436.243	100.055	105.683	281.214	290.765	0.120952	-0.120952	-0.781436	0.781436	-0.139573	0.139573	-0.0851937	0.0851937	0.159527	1
780	OG0003585	71.8347	133.609	77.2483	97.3352	60.095	76.5263	81.1804	90.3425	87.966	146.449	-0.570218	0.570218	-0.596051	0.596051	-0.26473	0.26473	-1.23644	1.23644	0.00362331	1
781	OG0003586	182.198	240.42	206.159	225.439	178.405	183.296	134.421	171.483	183.323	273.389	-0.346656	0.346656	-0.104931	0.104931	-0.940183	0.940183	-1.53035	1.53035	0.0177545	1
782	OG0003590	101.655	139.774	220.216	397.865	416.307	226.709	55.384	121.338	606.065	731.71	-1.04169	1.04169	1.06865	-1.06865	-1.35261	1.35261	-0.340393	0.340393	0.315906	1
783	OG0003591	182.044	330.457	176.618	255.334	405.876	407.834	186.653	208.564	186.089	254.147	-1.01854	1.01854	-0.0134508	0.0134508	-0.30987	0.30987	-0.864074	0.864074	0.016079	1
784	OG0003592	349.431	346.001	784.822	993.014	224.474	175.847	1034.49	1168.32	470.357	691.797	-0.949217	0.949217	0.984608	-0.984608	-0.492433	0.492433	-1.54449	1.54449	0.237828	1
785	OG0003595	265.955	349.091	100.155	97.8584	166.567	169.104	65.6037	65.6951	98.5866	109.837	0.168256	-0.168256	-0.109658	0.109658	-0.0101024	0.0101024	-0.783139	0.783139	0.258133	1
786	OG0003597	343.843	357.676	136.65	136.446	126.775	126.127	207.444	225.645	67.1844	101.817	0.00756295	-0.00756295	0.0258489	-0.0258489	-0.424262	0.424262	-2.06873	2.06873	0.129886	1
787	OG0003598	361.495	180.938	342.173	138.881	6369.98	6257.05	668.217	900.802	799.274	1038.93	1.56425	-1.56425	0.0331061	-0.0331061	-0.548695	0.548695	-0.482591	0.482591	0.698139	1
788	OG0003600	296.74	327.336	429.046	372.423	943.866	1044.07	286.232	304.139	470.999	508.03	1.35208	-1.35208	-0.964668	0.964668	-0.580481	0.580481	-0.72388	0.72388	0.565351	1
789	OG0003603	32.1741	52.5538	278.351	463.395	200.609	140.44	290.519	317.574	104.123	214.307	-1.01299	1.01299	0.716372	-0.716372	-0.180661	0.180661	-1.40503	1.40503	0.207254	1
790	OG0003605	52.5458	137.916	89.2923	108.446	144.58	138.578	197.386	234.426	64.834	89.2536	-0.416644	0.416644	0.0911751	-0.0911751	-0.368968	0.368968	-0.681687	0.681687	0.0230848	1
791	OG0003606	31.9389	47.5963	73.5643	73.7362	91.975	109.719	50.7687	50.4606	81.2705	86.0494	-0.0113802	0.0113802	-0.857917	0.857917	0.029674	-0.029674	-0.278524	0.278524	0.101458	1
792	OG0003609	447.342	318.332	173.3	134.012	100.725	92.0255	138.131	126.522	357.493	276.802	1.06473	-1.06473	0.375878	-0.375878	0.36533	-0.36533	1.05948	-1.05948	0.00227741	1
793	OG0003613	327.506	343.448	322.271	354.061	505.838	527.848	198.707	192.851	169.931	148.319	-1.11047	1.11047	-0.503039	0.503039	0.353327	-0.353327	1.60434	-1.60434	0.843024	1
794	OG0003615	63.3021	78.2921	252.918	280.019	503.06	523.629	258.624	288.378	406.59	563.881	-0.517674	0.517674	-0.203948	0.203948	-0.553743	0.553743	-1.64994	1.64994	0.0169975	1
795	OG0003616	67.337	82.8686	95.1011	77.1743	204.613	224.311	55.384	50.6722	114.979	125.337	1.33208	-1.33208	-0.587889	0.587889	0.568724	-0.568724	-0.551722	0.551722	0.584396	1
796	OG0003618	137.06	150.216	114.848	94.5559	130.117	128.539	30.9071	31.2073	52.4079	52.3768	1.91289	-1.91289	0.120404	-0.120404	-0.0954151	0.0954151	0.00585512	-0.00585512	0.200309	1
797	OG0003622	145.259	130.201	521.476	434.538	834.539	814.817	355.791	352.697	525.227	529.931	1.80358	-1.80358	0.237142	-0.237142	0.0866275	-0.0866275	-0.088424	0.088424	0.149639	1
798	OG0003623	66.1931	65.9152	188.463	176.773	158.117	226.923	102.856	119.856	173.854	207.647	0.314414	-0.314414	-1.75538	1.75538	-0.749826	0.749826	-0.870129	0.870129	0.0433513	1
799	OG0003624	84.8788	87.0746	174.373	181.29	99.1005	71.1759	110.72	130.449	162.772	176.11	-0.21842	0.21842	1.84181	-1.84181	-0.918722	0.918722	-0.44204	0.44204	0.883964	1
800	OG0003625	207.734	263.916	119.428	115.586	227.396	243.01	93.5429	122.606	126.062	149.121	0.171977	-0.171977	-0.349184	0.349184	-1.41453	1.41453	-0.881576	0.881576	0.0429152	1
801	OG0003627	554.398	658.276	413.898	440.104	982.972	915.129	400.546	448.327	633.773	656.884	-0.569907	0.569907	0.663824	-0.663824	-1.04541	1.04541	-0.332564	0.332564	0.25431	1
802	OG0003629	336.936	245.056	458.597	480.253	743.466	752.499	391.149	377.873	641.854	550.517	-0.275014	0.275014	-0.0719923	0.0719923	0.20582	-0.20582	0.913285	-0.913285	0.333378	1
803	OG0003631	37.4767	52.2832	237.753	216.924	210.766	145.046	124.036	141.014	231.572	251.21	0.369459	-0.369459	1.48965	-1.48965	-0.516598	0.516598	-0.328063	0.328063	0.459547	1
804	OG0003637	163.65	143.286	81.1992	102.378	103.053	75.6639	82.912	75.217	48.0258	58.7933	-1.05581	1.05581	1.40256	-1.40256	0.445358	-0.445358	-0.922532	0.922532	0.939881	1
805	OG0003638	705.885	859.955	1112.05	1141.62	333.139	244.798	368.815	395.221	366.412	280.877	-0.122195	0.122195	1.42367	-1.42367	-0.321902	0.321902	1.23076	-1.23076	0.133711	1
806	OG0003641	331.964	379.813	235.225	264.199	433.827	419.519	478.381	557.038	402.656	427.852	-1.00965	1.00965	0.291823	-0.291823	-1.32209	1.32209	-0.528	0.528	0.04161	1
807	OG0003642	873.581	930.699	756.858	817.804	757.409	679.288	605.185	652.815	587.823	696.166	-0.693653	0.693653	0.974506	-0.974506	-0.678546	0.678546	-1.51224	1.51224	0.243132	1
808	OG0003643	38.7045	56.0513	307.578	492.939	76.0143	83.0166	61.7309	70.0334	97.6608	106.9	-1.59299	1.59299	-0.302914	0.302914	-0.433488	0.433488	-0.310713	0.310713	0.024393	1
809	OG0003646	214.499	229.256	51.9738	50.0573	198.367	226.206	32.1433	33.9588	181.478	203.903	0.400511	-0.400511	-1.39807	1.39807	-0.585606	0.585606	-1.24071	1.24071	0.0502484	1
810	OG0003649	277.047	298.237	118.167	143.92	301.973	320.418	147.609	167.675	174.542	168.365	-1.63438	1.63438	-0.492941	0.492941	-1.05862	1.05862	0.299616	-0.299616	0.0482061	1
811	OG0003650	794.145	965.503	680.878	705.521	253.387	375.056	317.304	296.204	577.205	554.528	-0.170571	0.170571	-1.85788	1.85788	0.330043	-0.330043	0.192286	-0.192286	0.332228	1
812	OG0003652	678.547	789.292	427.636	502.85	487.04	498.154	516.849	634.542	497.221	630.94	-0.893242	0.893242	-0.124663	0.124663	-1.12956	1.12956	-1.3098	1.3098	0.00337727	1
813	OG0003653	77.7038	65.4787	363.185	377.704	367.403	144.11	302.965	320.747	410.511	509.634	-0.0905731	0.0905731	2.01762	-2.01762	-0.131771	0.131771	-0.497897	0.497897	0.453035	1
814	OG0003654	273.12	218.954	290.832	206.492	157.23	211.715	68.6539	67.0682	290.863	231.37	1.30668	-1.30668	-1.13785	1.13785	0.0900201	-0.0900201	0.877743	-0.877743	0.482395	1
815	OG0003656	124.164	167.466	87.3603	97.1631	111.135	125.273	37.1699	36.9209	53.7955	48.3682	-0.637198	0.637198	-0.717307	0.717307	0.0403136	-0.0403136	0.63718	-0.63718	0.480125	1
816	OG0003657	230.153	252.46	93.6793	129.489	165.804	181.843	85.5485	96.9024	112.213	141.906	-1.5612	1.5612	-0.448868	0.448868	-0.605458	0.605458	-1.13682	1.13682	0.00199323	1
817	OG0003658	95.9099	117.812	108.529	110.199	388.669	146.65	35.4392	33.4288	62.1073	76.6986	-0.0340121	0.0340121	2.01356	-2.01356	0.13001	-0.13001	-0.468182	0.468182	0.331266	1
818	OG0003659	375.306	379.593	206.929	206.909	102.018	162.885	178.844	178.993	367.105	365.857	0.000440838	-0.000440838	-2.12061	2.12061	-0.00385132	0.00385132	0.0157051	-0.0157051	0.210116	1
819	OG0003663	46.5239	45.6019	240.598	260.202	113.134	107.146	190.794	223.952	201.865	220.512	-0.802329	0.802329	0.55721	-0.55721	-1.63858	1.63858	-0.904855	0.904855	0.0746909	1
820	OG0003669	187.319	270.351	299.282	316.59	120.604	150.987	242.799	220.145	463.378	364.788	-0.237916	0.237916	-0.947097	0.947097	0.414276	-0.414276	1.00783	-1.00783	0.848752	1
821	OG0003670	179.353	193.573	130.642	138.705	145.808	137.644	116.785	120.493	105.513	113.271	-0.928117	0.928117	0.893036	-0.893036	-0.484489	0.484489	-1.09936	1.09936	0.251936	1
822	OG0003671	132.111	127.566	199.998	185.114	439.657	417.684	75.7417	75.6381	141.069	182.527	0.596823	-0.596823	0.395777	-0.395777	0.0105769	-0.0105769	-1.97838	1.97838	0.580782	1
823	OG0003677	137.275	111.61	341.384	310.088	282.598	304.584	258.707	259.073	341.701	331.474	0.844127	-0.844127	-0.657915	0.657915	-0.0124126	0.0124126	0.266939	-0.266939	0.635271	1
824	OG0003680	163.589	66.123	100.531	141.377	167.004	198.295	257.635	281.29	146.386	171.941	-0.756387	0.756387	-0.38372	0.38372	-0.196622	0.196622	-0.359621	0.359621	0.00228893	1
825	OG0003682	41.1557	50.0335	221.167	231.347	256.155	292.144	96.4283	104.625	161.387	210.857	-0.260295	0.260295	-0.759432	0.759432	-0.471684	0.471684	-1.53762	1.53762	0.00864434	1
826	OG0003688	193.229	231.661	46.1288	49.3637	99.2738	96.659	30.5766	35.1225	40.6352	52.3795	-0.413277	0.413277	0.162808	-0.162808	-0.844115	0.844115	-1.54033	1.54033	0.0409481	1
827	OG0003691	434.478	577.022	163.19	192.239	240.812	214.104	189.887	206.499	214.03	233.035	-0.946542	0.946542	0.679937	-0.679937	-0.485368	0.485368	-0.492346	0.492346	0.25246	1
828	OG0003692	30.5675	90.0598	125.75	102.204	143.038	132.09	37.2103	33.944	79.9013	80.6805	0.431705	-0.431705	0.166308	-0.166308	0.191852	-0.191852	-0.0202781	0.0202781	0.0261403	1
829	OG0003693	39.1535	60.4402	163.819	150.523	206.713	269.413	56.7043	65.1651	296.917	261.36	0.330534	-0.330534	-1.02908	1.02908	-0.542524	0.542524	0.497702	-0.497702	0.495108	1
830	OG0003697	105.916	88.653	644.695	430.89	1040.02	1032.77	191.208	187.665	611.376	693.499	1.8591	-1.8591	0.0327031	-0.0327031	0.0874695	-0.0874695	-0.588609	0.588609	0.386522	1
831	OG0003698	39.2971	69.1186	104.896	99.0751	79.2292	113.347	125.686	126.309	148.688	158.475	0.183447	-0.183447	-1.13895	1.13895	-0.0158925	0.0158925	-0.204828	0.204828	0.205036	1
832	OG0003702	366.422	435.553	66.0336	90.0367	81.2958	131.209	75.7409	62.8378	98.8175	68.6813	-0.91443	0.91443	-1.39653	1.39653	0.55361	-0.55361	1.06975	-1.06975	0.692618	1
833	OG0003704	27.9055	55.646	305.047	343.977	432.449	436.075	259.778	310.064	199.023	274.992	-0.331505	0.331505	-0.0230755	0.0230755	-0.487711	0.487711	-0.885766	0.885766	0.0144056	1
834	OG0003706	145.087	186.504	180.566	211.88	244.446	259.734	193.951	225.921	206.868	264.038	-0.812278	0.812278	-0.30868	0.30868	-0.77511	0.77511	-1.23588	1.23588	0.00110819	1
835	OG0003707	172.27	98.2836	164.648	168.939	86.4634	49.2771	205.896	252.704	122.139	182.257	-0.0610988	0.0610988	1.30135	-1.30135	-0.484854	0.484854	-0.93818	0.93818	0.898026	1
836	OG0003710	44.6332	45.5071	108.527	98.2078	85.1986	99.6748	47.6377	47.4996	103.671	96.2046	1.05289	-1.05289	-1.65163	1.65163	0.0305995	-0.0305995	0.787894	-0.787894	0.902603	1
837	OG0003711	138.558	169.192	134.911	144.441	84.596	52.3066	46.6478	41.9976	82.194	100.748	-0.256286	0.256286	1.77182	-1.77182	0.394082	-0.394082	-0.761885	0.761885	0.487415	1
838	OG0003712	19.2156	77.1705	154.816	187.721	262.008	253.013	128.899	142.812	505.869	602.629	-0.330011	0.330011	0.0599962	-0.0599962	-0.175909	0.175909	-0.299864	0.299864	0.0248244	1
839	OG0003713	477.108	522.642	215.32	218.834	227.952	172.823	172.499	201.526	269.61	390.898	-0.069632	0.069632	1.18338	-1.18338	-0.667644	0.667644	-1.57971	1.57971	0.514802	1
840	OG0003718	275.202	313.471	147.392	173.99	196.101	155.159	106.317	141.651	114.52	217.535	-0.467183	0.467183	0.657973	-0.657973	-0.804391	0.804391	-1.75131	1.75131	0.143664	1
841	OG0003722	192.286	294.147	202.84	191.198	175.252	182.126	146.948	144.188	90.0463	101.819	0.283301	-0.283301	-0.184413	0.184413	0.0908884	-0.0908884	-0.588339	0.588339	0.484248	1
842	OG0003724	275.237	307.215	180.724	189.463	104.051	133.422	151.73	181.956	329.007	379.481	-0.2793	0.2793	-1.46329	1.46329	-1.07166	1.07166	-0.842864	0.842864	0.00196419	1
843	OG0003725	154.748	201.647	212.636	183.378	251.132	222.314	119.669	131.388	192.327	258.153	0.700832	-0.700832	0.577378	-0.577378	-0.442783	0.442783	-1.3861	1.3861	0.704139	1
844	OG0003730	219.999	236.259	297.622	301.571	144.14	219.131	119.669	126.098	176.625	239.179	-0.0539079	0.0539079	-1.68871	1.68871	-0.21398	0.21398	-1.23069	1.23069	0.0291607	1
845	OG0003732	25.746	40.2768	272.351	293.228	546.915	569.764	205.63	225.116	255.125	280.07	-0.335601	0.335601	-0.186033	0.186033	-0.411301	0.411301	-0.423771	0.423771	0.000121086	0.235027
846	OG0003734	131.502	159.838	202.839	166.691	223.452	248.05	53.9013	51.4127	822.506	1079.49	1.0303	-1.0303	-0.549475	0.549475	0.248889	-0.248889	-1.4231	1.4231	0.658097	1
847	OG0003735	473.399	562.761	597.154	783.248	384.776	351.529	335.682	449.173	496.165	799.589	-0.889372	0.889372	0.297893	-0.297893	-0.953953	0.953953	-1.54484	1.54484	0.0299652	1
848	OG0003736	334.486	435.254	141.863	207.187	120.151	191.203	133.213	170.856	245.892	332.18	-1.0541	1.0541	-1.28534	1.28534	-0.6973	0.6973	-0.84075	0.84075	3.96759e-05	0.0774871
849	OG0003742	317.398	428.95	94.4692	95.425	91.2146	99.4386	202.498	247.544	401.268	365.232	-0.0559221	0.0559221	-0.479256	0.479256	-1.11208	1.11208	0.522344	-0.522344	0.292492	1
850	OG0003743	54.0058	58.6494	470.512	474.637	349.718	382.288	329.315	366.061	601.503	552.652	-0.101753	0.101753	-1.03718	1.03718	-1.23178	1.23178	0.986633	-0.986633	0.372688	1
851	OG0003744	113.427	136.657	376.141	268.893	886.243	820.643	215.766	237.279	820.331	792.905	1.75708	-1.75708	0.406152	-0.406152	-0.501824	0.501824	0.179656	-0.179656	0.218253	1
852	OG0003745	110.267	124.844	86.4156	81.1703	1153.39	1222.85	59.5881	62.3088	62.7976	57.7243	0.744742	-0.744742	-0.695531	0.695531	-0.531095	0.531095	1.0016	-1.0016	0.686505	1
853	OG0003746	130.375	189.837	226.852	176.771	286.739	177.176	121.812	126.945	259.975	323.096	0.766894	-0.766894	1.45968	-1.45968	-0.127539	0.127539	-0.669087	0.669087	0.325148	1
854	OG0003748	28.7959	44.2547	328.746	334.25	297.907	328.872	198.13	222.682	207.561	262.429	-0.0694288	0.0694288	-0.413212	0.413212	-0.487993	0.487993	-0.976453	0.976453	0.0103014	1
855	OG0003751	100.751	117.068	154.501	116.631	202.135	246.281	114.89	114.991	204.1	212.995	1.57775	-1.57775	-1.11205	1.11205	-0.00497981	0.00497981	-0.240898	0.240898	0.894284	1
856	OG0003752	219.654	239.357	622.737	555.514	393.133	313.375	606.017	697.639	566.582	513.373	0.762269	-0.762269	1.50829	-1.50829	-0.939002	0.939002	0.658287	-0.658287	0.220811	1
857	OG0003753	403.492	517.955	276.439	418.125	232.983	254.661	401.725	574.693	161.156	194.814	-1.37295	1.37295	-0.299198	0.299198	-1.19226	1.19226	-0.636394	0.636394	0.00246692	1
858	OG0003754	151.466	234.439	156.079	161.475	114.446	222.83	245.619	278.96	264.362	282.472	-0.0915727	0.0915727	-1.73194	1.73194	-0.34254	0.34254	-0.178492	0.178492	0.0750582	1
859	OG0003757	284.697	452.903	311.055	342.593	724.58	722.314	320.192	411.832	177.964	343.08	-0.247929	0.247929	0.00804837	-0.00804837	-0.643268	0.643268	-1.62836	1.62836	0.0484118	1
860	OG0003758	1303.39	459.094	153.71	149.831	363.224	337.474	202.087	194.332	288.138	231.699	0.0549714	-0.0549714	0.158088	-0.158088	0.0841553	-0.0841553	0.467062	-0.467062	0.0288498	1
861	OG0003759	59.7345	53.5117	311.685	339.814	231.654	213.833	310.052	345.503	213.333	351.961	-0.347297	0.347297	0.321786	-0.321786	-0.435003	0.435003	-1.97262	1.97262	0.126579	1
862	OG0003762	409.146	466.064	199.049	184.944	274.989	195.735	172.168	188.721	270.596	326.036	0.368708	-0.368708	1.68998	-1.68998	-0.460375	0.460375	-0.932703	0.932703	0.696393	1
863	OG0003765	142.916	185.54	255.76	245.778	215.807	230.548	97.9934	115.837	90.5057	102.087	0.248344	-0.248344	-0.412073	0.412073	-1.04118	1.04118	-0.750253	0.750253	0.0469842	1
864	OG0003769	247.562	326.266	195.256	241.78	209.53	264.628	71.2904	76.3786	282.74	494.706	-0.654162	0.654162	-0.714078	0.714078	-0.211737	0.211737	-1.6754	1.6754	0.00969386	1
865	OG0003771	2933.22	3786.47	1089.83	1457.77	1151.43	1199.85	1349	1674.83	1207.07	1873.9	-0.989552	0.989552	-0.141084	0.141084	-0.738277	0.738277	-1.48289	1.48289	0.00540062	1
866	OG0003772	64.4948	40.1013	236.173	172.427	94.8744	51.8314	26.0437	24.0138	143.378	77.233	0.653646	-0.653646	1.22926	-1.22926	0.169901	-0.169901	1.2562	-1.2562	0.00406498	1
867	OG0003775	76.0422	119.682	244.546	280.191	327.475	249.118	128.24	165.452	215.413	269.11	-0.453136	0.453136	0.906499	-0.906499	-0.845194	0.845194	-0.739268	0.739268	0.361546	1
868	OG0003777	67.8593	81.0533	121.955	127.581	50.709	88.8641	64.7795	64.1051	58.8749	57.4571	-0.165734	0.165734	-2.00967	2.00967	0.0384669	-0.0384669	0.0895966	-0.0895966	0.199659	1
869	OG0003781	79.6037	114.223	132.701	203.189	555.564	577.974	85.5238	89.3894	65.5728	122.13	-1.08738	1.08738	-0.102437	0.102437	-0.114513	0.114513	-1.56126	1.56126	0.031881	1
870	OG0003782	193.804	160.552	115.006	94.0344	143.393	286.236	61.8949	63.6841	170.853	172.636	0.591058	-0.591058	-1.95883	1.95883	-0.0839385	0.0839385	-0.0305856	0.0305856	0.378376	1
871	OG0003783	153.945	262.812	214.532	182.508	116.82	179.206	37.4996	24.7543	657.323	471.148	0.394298	-0.394298	-1.03026	1.03026	1.00087	-1.00087	0.806534	-0.806534	0.401474	1
872	OG0003784	112.647	167.285	118.007	139.053	222.72	224.91	83.1584	78.707	115.441	120.794	-0.808924	0.808924	-0.0483283	0.0483283	0.271729	-0.271729	-0.223874	0.223874	0.253736	1
873	OG0003788	163.351	215.369	149.918	178.683	145.917	222.152	134.339	143.871	142.685	148.319	-0.697002	0.697002	-1.6492	1.6492	-0.272805	0.272805	-0.154169	0.154169	0.0276958	1
874	OG0003789	34.4818	51.1988	130.014	127.405	85.0202	74.8536	85.6309	90.9783	106.206	101.018	0.10275	-0.10275	0.644877	-0.644877	-0.307049	0.307049	0.253893	-0.253893	0.258575	1
875	OG0003790	261.095	397.869	315.317	338.943	470.927	710.287	245.388	275.402	226.493	258.156	-0.251141	0.251141	-1.40929	1.40929	-0.400806	0.400806	-0.454365	0.454365	0.0149817	1
876	OG0003795	2271.48	2878.7	1387.5	1565.91	1850.33	1676.33	1681.54	1980.56	492.007	937.756	-0.364131	0.364131	0.297406	-0.297406	-0.492179	0.492179	-1.87926	1.87926	0.108356	1
877	OG0003796	57.1733	78.3052	449.915	396.3	341.441	430.159	205.382	214.221	537.491	496.806	0.644004	-0.644004	-1.16871	1.16871	-0.214102	0.214102	0.399828	-0.399828	0.776681	1
878	OG0003800	67.8441	83.9998	84.1992	80.3012	73.1564	81.3631	53.5708	49.0854	56.3375	72.6872	0.278104	-0.278104	-0.623339	0.623339	0.51281	-0.51281	-1.48722	1.48722	0.346598	1
879	OG0003804	28.2873	40.1091	98.5765	78.909	118.152	136.35	72.6915	80.9274	127.678	143.509	1.01582	-1.01582	-0.655498	0.655498	-0.491471	0.491471	-0.535155	0.535155	0.573331	1
880	OG0003808	689.634	1004.5	401.889	464.264	492.016	660.43	573.687	594.351	540.719	780.874	-0.497161	0.497161	-1.00887	1.00887	-0.122136	0.122136	-1.25451	1.25451	0.00706072	1
881	OG0003810	307.648	363.023	394.624	338.593	570.045	677.129	182.8	204.592	424.823	351.694	0.905309	-0.905309	-1.0172	1.0172	-0.666422	0.666422	1.1157	-1.1157	0.832859	1
882	OG0003816	187.313	192.032	55.4493	61.1832	80.2224	100.444	26.6206	29.0916	43.6367	46.5002	-0.775695	0.775695	-1.76601	1.76601	-0.699805	0.699805	-0.501243	0.501243	0.00339642	1
883	OG0003818	1578.02	2041.51	2002.91	1989.53	1094.97	849.818	1481.23	1237.14	1035.97	736.255	0.0270618	-0.0270618	1.01827	-1.01827	0.725361	-0.725361	1.36612	-1.36612	0.00797959	1
884	OG0003819	111.561	95.4024	108.053	111.416	131.428	105.967	39.9721	44.746	135.759	126.138	-0.217366	0.217366	1.52157	-1.52157	-0.79945	0.79945	0.521133	-0.521133	0.496197	1
885	OG0003822	88.7518	117.05	93.9952	104.985	158.709	156.412	37.3348	43.2671	101.588	99.4142	-0.705924	0.705924	0.0931946	-0.0931946	-0.940733	0.940733	0.138239	-0.138239	0.119182	1
886	OG0003829	112.671	131.77	127.958	88.2985	121.47	189.094	88.5971	82.5142	168.544	160.613	1.30409	-1.30409	-1.54836	1.54836	0.252787	-0.252787	0.171342	-0.171342	0.917744	1
887	OG0003831	24.5532	54.8319	94.1548	95.5988	78.9473	48.725	69.3116	69.5034	117.75	113.041	-0.0359182	0.0359182	1.11731	-1.11731	-0.00652319	0.00652319	0.0963057	-0.0963057	0.184619	1
888	OG0003832	557.944	2087.39	1248.32	1465.44	864.577	818.671	579.802	679.379	681.102	929.202	-0.278492	0.278492	0.094929	-0.094929	-0.275262	0.275262	-0.536284	0.536284	0.0351455	1
889	OG0003838	373.954	595.247	580.873	708.82	894.647	431.766	204.805	223.952	249.583	270.714	-0.486143	0.486143	1.71006	-1.71006	-0.218838	0.218838	-0.199011	0.199011	0.594468	1
890	OG0003841	119.124	142.532	100.316	99.2507	12.1276	83.25	39.6416	43.4787	30.7073	45.7011	0.01456	-0.01456	-2.03417	2.03417	-0.125927	0.125927	-0.5353	0.5353	0.0899842	1
891	OG0003844	172.021	179.924	130.963	142.529	234.602	38.8235	84.5595	93.093	169.006	165.161	-0.124717	0.124717	2.1116	-2.1116	-0.141658	0.141658	0.0339284	-0.0339284	0.271485	1
892	OG0003848	601.407	781.846	683.713	729.158	150.733	265.474	376.645	415.323	210.105	235.443	-0.216122	0.216122	-1.85239	1.85239	-0.328152	0.328152	-0.382123	0.382123	0.0443357	1
893	OG0003852	666.482	558.41	405.677	483.553	201.561	208.834	559.69	674.182	402.658	469.01	-1.06951	1.06951	-0.216422	0.216422	-1.13319	1.13319	-0.929614	0.929614	0.0013749	1
894	OG0003853	103.083	114.035	164.293	173.293	105.088	125.051	126.84	128.85	159.078	200.165	-0.36566	0.36566	-1.18971	1.18971	-0.107826	0.107826	-1.56865	1.56865	0.0157448	1
895	OG0003856	24.9412	52.3691	231.276	287.665	242.77	290.793	146.867	164.5	102.742	156.604	-0.525906	0.525906	-0.4356	0.4356	-0.274083	0.274083	-1.00514	1.00514	0.0023577	1
896	OG0003860	78.9241	101.837	201.102	248.557	304.29	342.789	112.582	113.299	233.653	242.391	-1.26962	1.26962	-0.715767	0.715767	-0.0382123	0.0382123	-0.220846	0.220846	0.0282954	1
897	OG0003863	197.587	410.583	390.358	374.747	497.383	419.318	76.2346	107.373	152.613	329.245	0.0798997	-0.0798997	0.333474	-0.333474	-0.664114	0.664114	-1.43544	1.43544	0.185556	1
898	OG0003864	586.634	924.385	510.571	537.613	167.219	163.679	466.505	544.845	462.727	650.855	-0.187399	0.187399	0.0776964	-0.0776964	-0.56267	0.56267	-1.22717	1.22717	0.0553381	1
899	OG0003866	724.847	612.047	318.162	376.659	77.4705	52.0512	236.866	297.369	455.99	561.746	-0.646357	0.646357	1.50672	-1.50672	-0.869462	0.869462	-0.797779	0.797779	0.635359	1
900	OG0003867	1102.24	1487.82	114.205	123.145	510.669	568.616	207.196	221.626	360.054	433.996	-0.41957	0.41957	-0.598056	0.598056	-0.374844	0.374844	-1.03728	1.03728	0.0012805	1
901	OG0003872	100.339	104.656	241.544	293.054	167.441	179.148	104.393	134.139	97.2036	108.768	-1.1886	1.1886	-0.416687	0.416687	-1.53833	1.53833	-0.692588	0.692588	0.00164374	1
902	OG0003873	126.18	110.062	290.832	204.06	695.882	579.748	185.273	183.225	477.464	417.433	1.69387	-1.69387	0.879511	-0.879511	0.0537042	-0.0537042	0.648059	-0.648059	0.0143241	1
903	OG0003878	188.242	218.669	69.8266	71.786	286.229	242.194	87.1144	91.7167	66.7249	95.94	-0.137378	0.137378	0.827405	-0.827405	-0.255523	0.255523	-1.78326	1.78326	0.410853	1
904	OG0003879	36.7848	130.996	161.879	139.242	105.352	129.921	132.444	85.3695	451.374	230.368	0.229302	-0.229302	-0.318529	0.318529	0.659239	-0.659239	0.988832	-0.988832	0.0991078	1
905	OG0003881	304.682	371.339	154.185	184.422	123.604	100.361	188.568	205.227	93.5049	128.006	-0.811308	0.811308	0.942868	-0.942868	-0.384349	0.384349	-1.4151	1.4151	0.283034	1
906	OG0003882	313.121	187.195	181.673	171.728	207.732	219.438	73.9278	76.0612	220.954	179.322	0.216656	-0.216656	-0.210995	0.210995	-0.109515	0.109515	0.800784	-0.800784	0.321151	1
907	OG0003883	119.429	153.955	216.9	283.666	160.432	171.252	81.7573	88.4383	68.1102	95.94	-1.10875	1.10875	-0.271165	0.271165	-0.326311	0.326311	-1.41017	1.41017	0.00821344	1
908	OG0003888	1282.27	2041.94	1380.7	1813.6	1157.94	1255.3	779.663	923.949	603.987	915.839	-0.824776	0.824776	-0.245543	0.245543	-0.515448	0.515448	-1.24878	1.24878	0.00349815	1
909	OG0003889	122.476	123.049	161.252	147.154	231.452	236.555	89.0108	91.9293	128.14	128.546	1.94852	-1.94852	-0.464837	0.464837	-0.687571	0.687571	-0.0675446	0.0675446	0.683957	1
910	OG0003891	49.7663	48.7293	442.645	364.84	717.724	712.748	310.464	329.316	412.124	425.984	1.9901	-1.9901	0.0718487	-0.0718487	-0.608595	0.608595	-0.341555	0.341555	0.528425	1
911	OG0003892	45.797	51.3295	284.515	296.353	290.406	325.051	165.493	165.982	226.498	251.208	-0.443393	0.443393	-1.22472	1.22472	-0.0320937	0.0320937	-1.12541	1.12541	0.0125606	1
912	OG0003893	39.5384	26.0103	382.461	416.11	211.425	236.723	145.465	163.546	223.491	298.245	-0.334264	0.334264	-0.447801	0.447801	-0.46417	0.46417	-1.13661	1.13661	0.00363912	1
913	OG0003894	382.416	470.574	73.46	67.4406	117.536	131.063	31.6472	28.1395	64.647	65.4744	0.658335	-0.658335	-0.838485	0.838485	0.90411	-0.90411	-0.0979887	0.0979887	0.594916	1
914	OG0003897	96.4719	114.156	147.865	134.534	95.6968	138.583	46.4022	46.1244	79.6543	116.518	0.358317	-0.358317	-1.38946	1.38946	0.0227913	-0.0227913	-1.42632	1.42632	0.114579	1
915	OG0003898	53.8226	55.6261	152.448	159.04	89.4196	92.3331	118.021	152.758	99.741	119.457	-0.281013	0.281013	-0.212843	0.212843	-1.70336	1.70336	-1.19433	1.19433	0.0162401	1
916	OG0003902	112.34	121.449	580.085	719.426	543.933	623.68	53.7357	54.5853	322.311	490.654	-0.923834	0.923834	-0.588451	0.588451	-0.0675783	0.0675783	-1.78409	1.78409	0.016398	1
917	OG0003903	945.738	1187.52	180.722	200.754	62.9452	74.4471	75.6577	79.0222	122.139	149.923	-0.60848	0.60848	-0.970055	0.970055	-0.252046	0.252046	-1.18337	1.18337	0.0020174	1
918	OG0003905	67.0453	85.4908	189.573	185.98	220.413	261.539	169.862	206.919	134.837	163.282	0.100531	-0.100531	-0.896448	0.896448	-1.03326	1.03326	-1.00238	1.00238	0.010169	1
919	OG0003907	345.743	373.516	521.95	606.004	423.363	613.564	296.206	355.024	233.189	447.898	-0.410592	0.410592	-1.01067	1.01067	-0.49764	0.49764	-1.73697	1.73697	0.00541958	1
920	OG0003908	46.1131	67.6386	63.1901	48.844	174.331	195.112	35.1095	29.9379	85.6572	93.5348	1.07691	-1.07691	-0.473047	0.473047	0.668647	-0.668647	-0.36972	0.36972	0.436944	1
921	OG0003913	80.2787	123.223	512.672	538.19	128.523	120.827	37.582	37.7661	54.4905	60.1295	-0.233899	0.233899	0.297332	-0.297332	-0.0235393	0.0235393	-0.473892	0.473892	0.384476	1
922	OG0003914	191.25	286.589	779.135	789.297	446.149	431.093	556.313	541.949	472.602	514.709	-0.0669529	0.0669529	0.177371	-0.177371	0.135155	-0.135155	-0.440745	0.440745	0.642195	1
923	OG0003915	349.555	548.111	551.491	1013.52	81.7432	94.7831	304.9	387.413	119.368	212.728	-1.29251	1.29251	-0.323403	0.323403	-0.521798	0.521798	-1.23077	1.23077	0.00287118	1
924	OG0003916	141.178	117.61	178.902	183.496	113.279	122.573	125.604	125.146	182.852	146.216	-0.179637	0.179637	-0.558466	0.558466	0.0259012	-0.0259012	1.57776	-1.57776	0.538804	1
925	OG0003917	473.29	542.356	163.19	231.12	163.618	182.752	155.603	167.25	82.6581	111.705	-1.47979	1.47979	-0.474495	0.474495	-0.309863	0.309863	-1.28369	1.28369	0.00498635	1
926	OG0003919	148.57	202.006	139.964	129.665	132.206	145.104	68.8995	74.3697	121.91	129.03	0.474871	-0.474871	-0.578181	0.578181	-0.474652	0.474652	-0.352708	0.352708	0.219956	1
927	OG0003928	252.678	319.403	244.702	237.956	688.865	724.311	253.021	261.929	398.045	417.435	0.239763	-0.239763	-0.430263	0.430263	-0.296739	0.296739	-0.407874	0.407874	0.0908314	1
928	OG0003930	245.01	272.496	266.976	251.166	407.681	426.619	176.62	176.135	775.761	1021.93	0.426623	-0.426623	-0.317346	0.317346	0.0192078	-0.0192078	-1.91455	1.91455	0.263936	1
929	OG0003931	46.8477	55.1804	76.3036	66.396	124.693	131.893	43.1039	43.5855	100.669	111.17	1.21206	-1.21206	-0.48984	0.48984	-0.0969805	0.0969805	-0.865363	0.865363	0.857239	1
930	OG0003938	219.003	229.338	136.964	161.303	53.6368	85.3539	99.3121	103.037	985.162	1703.07	-0.478396	0.478396	-1.33785	1.33785	-0.107924	0.107924	-1.56569	1.56569	0.0118469	1
931	OG0003940	311.449	348.76	301.099	296.704	222.306	233.237	135.327	144.401	244.966	281.409	0.158614	-0.158614	-0.517657	0.517657	-0.699772	0.699772	-1.49359	1.49359	0.0377084	1
932	OG0003941	35.9189	35.4851	45.9724	45.366	80.2845	81.5032	28.9291	28.35	54.719	63.8709	0.178925	-0.178925	-0.203008	0.203008	0.272466	-0.272466	-2.07984	2.07984	0.283933	1
933	OG0003945	62.8225	69.6212	90.5214	84.1269	132.32	102.751	53.9829	52.8937	127.909	128.279	0.550518	-0.550518	1.89136	-1.89136	0.153231	-0.153231	-0.0217372	0.0217372	0.0802827	1
934	OG0003946	72.5464	91.8496	55.2913	50.5804	156.995	176.058	36.8403	39.9877	73.0672	69.6059	0.646596	-0.646596	-0.831775	0.831775	-0.595316	0.595316	0.352539	-0.352539	0.687746	1
935	OG0003947	78.7103	132.756	65.0858	44.3213	110.367	95.5274	32.0609	38.9298	85.1955	97.5461	1.15998	-1.15998	0.440507	-0.440507	-0.591374	0.591374	-0.413076	0.413076	0.621717	1
936	OG0003948	183.878	156.953	153.55	81.8673	131.625	148.647	64.2026	51.6243	160.461	185.199	1.86805	-1.86805	-0.372611	0.372611	0.66623	-0.66623	-0.439069	0.439069	0.303969	1
937	OG0003951	86.8993	112.946	75.9845	110.721	199.701	212.857	143.651	175.503	98.1249	169.966	-1.0766	1.0766	-0.184533	0.184533	-0.577499	0.577499	-1.55067	1.55067	0.00685649	1
938	OG0003958	50.6826	38.2079	210.423	173.64	81.7536	134.972	132.939	135.409	251.197	266.441	0.676773	-0.676773	-1.73522	1.73522	-0.065047	0.065047	-0.208093	0.208093	0.388123	1
939	OG0003959	249.092	305.525	92.891	87.0801	176.237	175.385	37.254	37.1304	132.524	125.069	0.619055	-0.619055	0.0464589	-0.0464589	0.0318662	-0.0318662	0.554846	-0.554846	0.0315913	1
940	OG0003962	65.6555	59.1789	193.52	208.927	105.411	94.3409	49.5324	48.9796	120.52	137.36	-0.756506	0.756506	1.09515	-1.09515	0.110888	-0.110888	-1.29035	1.29035	0.589824	1
941	OG0003963	191.971	181.354	148.179	164.43	145.899	153.168	112.018	136.323	159.579	164.501	-0.934975	0.934975	-0.437157	0.437157	-1.76024	1.76024	-0.273178	0.273178	0.0113039	1
942	OG0003964	100.414	140.307	70.9293	80.1274	181.563	176.879	151.976	184.494	90.9698	87.6528	-0.637708	0.637708	0.136834	-0.136834	-1.01217	1.01217	0.194478	-0.194478	0.166621	1
943	OG0003967	162.326	246.353	254.814	417.158	228.379	241.702	261.755	428.757	87.2734	168.63	-1.00315	1.00315	-0.117683	0.117683	-1.00422	1.00422	-1.32006	1.32006	0.00330647	1
944	OG0003969	51.9242	51.7131	60.822	62.0523	97.5047	109.59	27.4456	26.1295	42.0182	35.0087	-0.19078	0.19078	-1.11195	1.11195	0.468067	-0.468067	1.73395	-1.73395	0.614249	1
945	OG0003970	423.448	679.398	944.042	1175.85	498.278	474.599	666.092	932.834	406.121	784.351	-0.525042	0.525042	0.116865	-0.116865	-0.801029	0.801029	-1.52553	1.52553	0.029474	1
946	OG0003976	225.724	289.967	322.584	255.336	231.488	196.556	203.301	224.638	485.776	461.258	1.25194	-1.25194	0.878015	-0.878015	-0.536423	0.536423	0.278543	-0.278543	0.140798	1
947	OG0003977	47.37	62.3965	263.184	221.269	102.659	111.049	205.052	190.84	282.371	263.501	1.05524	-1.05524	-0.47878	0.47878	0.437853	-0.437853	0.421622	-0.421622	0.159049	1
948	OG0003978	156.338	148.46	124.484	95.6005	233.588	293.056	69.3965	64.212	133.678	112.506	1.40001	-1.40001	-1.20456	1.20456	0.413942	-0.413942	0.917414	-0.917414	0.376872	1
949	OG0003979	22.1082	45.7039	162.558	176.427	155.006	220.254	98.9008	108.538	135.064	173.173	-0.210229	0.210229	-0.893465	0.893465	-0.238725	0.238725	-0.635311	0.635311	0.00539599	1
950	OG0003981	64.8186	79.6766	674.715	650.073	536.686	539.653	383.12	386.167	440.74	386.935	0.320376	-0.320376	-0.0474773	0.0474773	-0.0682028	0.0682028	1.11969	-1.11969	0.142627	1
951	OG0003982	143.158	181.25	123.691	111.765	177.502	239.436	59.9169	59.0284	126.521	150.989	0.499621	-0.499621	-1.46527	1.46527	0.0736875	-0.0736875	-0.869721	0.869721	0.211666	1
952	OG0003983	178.702	188.375	151.023	135.75	176.224	175.622	100.054	110.019	187.014	190.544	1.4744	-1.4744	0.0474391	-0.0474391	-1.31328	1.31328	-0.258795	0.258795	0.976356	1
953	OG0003984	116.793	124.187	292.395	327.951	236.366	232.639	210.163	213.055	153.998	184.397	-1.09161	1.09161	0.151362	-0.151362	-0.130163	0.130163	-1.71088	1.71088	0.0624733	1
954	OG0003991	127.895	118.374	84.0428	84.1269	98.7229	159.477	74.0918	70.3487	57.4896	55.8536	-0.00441596	0.00441596	-2.07724	2.07724	0.228775	-0.228775	0.127423	-0.127423	0.310386	1
955	OG0003992	68.7604	73.1165	228.274	248.732	510.281	507.012	164.752	197.505	72.7255	217.533	-0.178476	0.178476	0.0133738	-0.0133738	-0.376251	0.376251	-2.07607	2.07607	0.102442	1
956	OG0003993	738.374	1099.48	696.511	1019.61	134.41	140.682	750.321	958.749	253.97	729.574	-0.702431	0.702431	-0.0850606	0.0850606	-0.455004	0.455004	-1.80415	1.80415	0.0269162	1
957	OG0003994	352.353	482.565	207.895	356.149	703.923	837.963	237.03	277.057	162.772	268.044	-1.36547	1.36547	-0.451621	0.451621	-0.404489	0.404489	-1.26944	1.26944	0.0030316	1
958	OG0003997	600.199	553.616	941.373	721.856	231.268	359.991	618.867	446.315	930.069	823.497	0.901829	-0.901829	-1.4876	1.4876	1.10689	-1.10689	0.41527	-0.41527	0.59621	1
959	OG0004002	432.511	457.788	327.641	300.178	296.042	266.999	248.487	275.893	369.18	423.315	0.82088	-0.82088	0.968022	-0.968022	-0.980785	0.980785	-1.2819	1.2819	0.785592	1
960	OG0004013	96.2291	115.718	96.5244	96.812	127.334	123.664	53.2412	50.5664	76.4243	85.7848	-0.0280388	0.0280388	0.275607	-0.275607	0.485683	-0.485683	-1.08774	1.08774	0.732052	1
961	OG0004014	41.0702	90.8419	275.191	205.624	262.833	205.799	146.289	156.884	224.186	288.354	0.69504	-0.69504	0.584639	-0.584639	-0.167881	0.167881	-0.601417	0.601417	0.581137	1
962	OG0004016	106.678	124.186	320.214	331.988	324.948	247.075	147.856	179.099	248.198	237.311	-0.20695	0.20695	1.56057	-1.56057	-1.09544	1.09544	0.257052	-0.257052	0.753305	1
963	OG0004017	82.4352	84.3344	195.575	188.938	195.938	69.6021	75.9058	83.2548	159.535	161.949	0.0765192	-0.0765192	2.10917	-2.10917	-0.204695	0.204695	-0.0332885	0.0332885	0.25237	1
964	OG0004019	77.7283	97.6699	211.056	237.434	180.037	103.987	328.101	426.007	200.867	203.636	-0.385065	0.385065	1.75303	-1.75303	-0.850012	0.850012	-0.0448118	0.0448118	0.778801	1
965	OG0004020	372.712	491.144	249.759	286.452	549.952	548.486	243.906	307.396	176.618	259.233	-0.538488	0.538488	0.0104997	-0.0104997	-0.90623	0.90623	-1.49158	1.49158	0.016896	1
966	OG0004022	111.561	123.183	69.0367	79.088	83.5589	103.863	30.4118	33.0068	75.2652	72.6926	-0.998833	0.998833	-1.59467	1.59467	-0.602313	0.602313	0.255941	-0.255941	0.036652	1
967	OG0004026	75.8925	102.655	67.9293	85.5175	104.077	122.516	39.6424	44.8539	42.4846	64.1382	-0.823048	0.823048	-0.584323	0.584323	-0.442881	0.442881	-1.45829	1.45829	0.00199601	1
968	OG0004028	580.283	833.182	270.136	245.256	271.782	233.073	378.753	421.323	126.521	170.501	0.401732	-0.401732	0.638075	-0.638075	-0.442787	0.442787	-1.23222	1.23222	0.617331	1
969	OG0004029	179.513	200.218	465.239	583.848	186.994	254.29	427.577	496.039	483.234	686.281	-0.877813	0.877813	-1.18404	1.18404	-0.575508	0.575508	-1.34799	1.34799	0.000171456	0.331939
970	OG0004032	203.167	261.487	273.931	311.306	328.951	342.424	306.92	375.758	246.813	338.067	-0.579015	0.579015	-0.181932	0.181932	-0.914217	0.914217	-1.41455	1.41455	0.00579655	1
971	OG0004035	76.0682	67.2738	188.935	182.835	217.242	210.27	96.2627	108.855	186.324	171.038	0.349848	-0.349848	0.34773	-0.34773	-1.30902	1.30902	0.912065	-0.912065	0.832138	1
972	OG0004037	240.894	277.177	1177.46	1102.31	1344.59	1335.08	1232.3	1287.01	1268.45	1408.9	0.72793	-0.72793	0.0784429	-0.0784429	-0.479611	0.479611	-1.15847	1.15847	0.491619	1
973	OG0004039	141.246	137.898	321.952	330.593	235.95	260.547	191.124	221.413	325.313	441.484	-0.15924	0.15924	-0.59577	0.59577	-0.882931	0.882931	-1.8219	1.8219	0.0132158	1
974	OG0004040	803.601	1179.24	602.675	671.107	1633.8	1351.31	399.308	518.358	771.199	1200.65	-0.340543	0.340543	0.599865	-0.599865	-0.822347	0.822347	-1.38054	1.38054	0.152678	1
975	OG0004044	83.9487	75.5278	33.6487	41.7158	92.9915	100.554	42.6918	34.8051	26.7823	83.6469	-0.420719	0.420719	-0.153571	0.153571	0.399991	-0.399991	-2.02394	2.02394	0.185876	1
976	OG0004045	331.871	364.303	536.485	537.267	407.542	323.642	216.013	244.052	548.899	440.656	-0.008767	0.008767	1.38211	-1.38211	-0.734082	0.734082	1.31756	-1.31756	0.23062	1
977	OG0004046	421.144	708.588	1166.38	1715.99	758.351	791.04	882.683	1075.86	1015.18	1397.67	-1.09524	1.09524	-0.121183	0.121183	-0.566526	0.566526	-0.910511	0.910511	0.00434805	1
978	OG0004047	813.162	910.178	357.657	352.323	635.409	617.173	252.113	286.05	317.46	310.8	0.183707	-0.183707	0.355969	-0.355969	-1.54196	1.54196	0.259211	-0.259211	0.583411	1
979	OG0004048	75.0068	82.7134	103.001	115.763	202.422	198.734	84.1474	99.7576	48.7138	70.0202	-0.581543	0.581543	0.0916426	-0.0916426	-0.84618	0.84618	-1.78889	1.78889	0.0297263	1
980	OG0004051	295.503	351.875	216.898	260.554	197.019	226.305	195.41	233.79	208.212	266.176	-0.928318	0.928318	-0.702383	0.702383	-0.907904	0.907904	-1.24056	1.24056	1.9954e-05	0.03909
981	OG0004052	211.216	254.84	132.856	140.963	182.698	190.607	77.5541	78.4943	63.7257	73.7562	-0.505375	0.505375	-0.361613	0.361613	-0.102842	0.102842	-1.24528	1.24528	0.0187064	1
982	OG0004053	434.689	476.854	350.389	412.118	103.994	166.874	135.328	162.384	329.007	177.182	-0.428253	0.428253	-1.22803	1.22803	-0.480749	0.480749	1.58668	-1.58668	0.75791	1
983	OG0004055	307.845	319.862	360.654	364.143	1049.82	1028.26	268.677	313.237	263.707	350.862	-0.0627517	0.0627517	0.135268	-0.135268	-0.998372	0.998372	-1.84898	1.84898	0.0757407	1
984	OG0004056	220.313	323.936	49.9202	58.2301	101.258	105.745	29.834	29.41	57.7205	69.483	-0.72016	0.72016	-0.203171	0.203171	0.0670827	-0.0670827	-0.866683	0.866683	0.0317194	1
985	OG0004058	0	39.8417	132.382	105.159	255.56	196.567	106.072	105.787	289.297	277.935	0.239479	-0.239479	0.27265	-0.27265	0.0028052	-0.0028052	0.0418593	-0.0418593	0.027943	1
986	OG0004059	80.5689	84.8796	85.305	73.6997	105.885	119.192	38.1589	39.3529	84.7337	96.2072	1.31992	-1.31992	-1.06922	1.06922	-0.278577	0.278577	-1.14673	1.14673	0.495518	1
987	OG0004061	825.919	931.523	511.915	570.829	735.756	745.776	713.518	857.513	362.106	524.861	-0.523095	0.523095	-0.065017	0.065017	-0.881159	0.881159	-1.76408	1.76408	0.0191225	1
988	OG0004067	153.638	174.374	195.889	165.122	178.508	167.843	169.531	162.49	212.411	222.883	1.57141	-1.57141	0.56776	-0.56776	0.391036	-0.391036	-0.443543	0.443543	0.124733	1
989	OG0004070	706.586	771.841	902.198	1061.66	842.794	880.846	370.711	417.228	492.474	515.243	-1.50931	1.50931	-0.410343	0.410343	-1.09733	1.09733	-0.419987	0.419987	0.00408942	1
990	OG0004071	61.1349	83.5395	349.853	388.395	275.584	222.83	295.958	291.128	130.485	193.93	-0.401134	0.401134	0.81324	-0.81324	0.0632131	-0.0632131	-1.50263	1.50263	0.482064	1
991	OG0004073	77.8734	91.6102	56.7115	57.0116	109.27	116.814	141.345	204.805	93.7381	82.8425	-0.0263593	0.0263593	-0.333263	0.333263	-1.83113	1.83113	0.616308	-0.616308	0.324198	1
992	OG0004074	115.313	143.736	70.9309	71.7877	70.3579	78.0259	52.253	47.6033	32.0926	42.7588	-0.0660174	0.0660174	-0.568231	0.568231	0.512003	-0.512003	-1.56687	1.56687	0.224231	1
993	OG0004075	37.7852	62.6309	104.896	136.442	74.9177	98.0543	67.088	85.7937	130.453	148.055	-0.8171	0.8171	-0.836127	0.836127	-0.764833	0.764833	-0.395069	0.395069	7.40083e-05	0.143946
994	OG0004076	38.3808	66.2686	139.652	78.0451	184.809	155.95	67.3031	42.4557	124.909	50.7787	0.9643	-0.9643	0.288578	-0.288578	0.771399	-0.771399	1.43778	-1.43778	0.00212384	1
995	OG0004077	80.4223	128.358	235.067	267.155	133.634	147.768	106.812	123.031	165.312	209.785	-0.484189	0.484189	-0.380629	0.380629	-0.534757	0.534757	-0.898519	0.898519	0.00036006	0.692034
996	OG0004080	107.231	121.52	100.79	135.922	149.38	146.609	65.8501	95.2109	146.379	185.466	-1.16431	1.16431	0.0734457	-0.0734457	-1.43006	1.43006	-0.924007	0.924007	0.00996404	1
997	OG0004081	205.258	121.641	62.2406	49.3655	105.949	96.247	61.1532	53.7411	126.985	50.776	0.471842	-0.471842	0.196261	-0.196261	0.263859	-0.263859	1.75348	-1.75348	0.040767	1
998	OG0004082	117.739	102.104	73.7744	102.204	84.6193	74.6311	61.9782	79.7638	117.055	308.398	-0.68119	0.68119	0.264463	-0.264463	-0.529091	0.529091	-1.89636	1.89636	0.0653191	1
999	OG0004083	199.934	452.454	1116.54	1081.41	992.066	622.823	389.584	502.491	308.456	944.969	0.049126	-0.049126	0.702836	-0.702836	-0.389049	0.389049	-1.56097	1.56097	0.408335	1
1000	OG0004086	82.3741	164.768	69.6671	91.7748	115.638	120.203	37.3348	35.1214	69.4932	66.2761	-0.800256	0.800256	-0.113116	0.113116	0.178511	-0.178511	0.138471	-0.138471	0.387705	1
1001	OG0004090	316.44	401.706	370.134	342.068	372.708	311.022	172.333	193.804	322.773	335.392	0.503227	-0.503227	1.1521	-1.1521	-0.748827	0.748827	-0.244831	0.244831	0.595556	1
1002	OG0004092	287.528	408.821	119.903	179.552	628.894	561.159	126.015	151.065	68.1102	95.4055	-1.27813	1.27813	0.365218	-0.365218	-0.580097	0.580097	-1.07111	1.07111	0.0479873	1
1003	OG0004094	186.003	229.572	135.857	104.117	84.7305	96.4942	73.5157	71.5102	137.144	133.888	1.54369	-1.54369	-0.75762	0.75762	0.161394	-0.161394	0.140191	-0.140191	0.449048	1
1004	OG0004096	41.3879	14.9	59.0811	39.2807	7.76955	112.611	46.6478	43.796	58.8749	49.4398	0.420957	-0.420957	-1.82124	1.82124	0.0659373	-0.0659373	0.182158	-0.182158	0.46021	1
1005	OG0004098	1814.16	1519.74	430.482	439.405	255.79	224.261	552.521	644.248	452.988	567.89	-0.124062	0.124062	0.794378	-0.794378	-0.927036	0.927036	-1.36133	1.36133	0.273564	1
1006	OG0004101	1848.38	1846.2	496.633	658.924	1049.17	1137.94	351.861	478.209	233.616	552.294	-0.651741	0.651741	-0.188355	0.188355	-0.706361	0.706361	-1.8817	1.8817	0.0152388	1
1007	OG0004103	69.2079	70.7776	75.1962	89.689	80.4241	69.4208	70.8783	86.9573	81.9631	78.0348	-1.19799	1.19799	1.00084	-1.00084	-1.38846	1.38846	0.334638	-0.334638	0.477152	1
1008	OG0004104	55.2857	54.1649	153.035	130.536	303.041	143.036	57.5013	58.7396	153.77	161.414	0.4568	-0.4568	2.06509	-2.06509	-0.0613301	0.0613301	-0.139639	0.139639	0.160358	1
1009	OG0004105	574.256	656.07	403.786	315.128	904.591	921.419	190.878	260.872	345.309	360.7	1.24437	-1.24437	-0.0929905	0.0929905	-1.56342	1.56342	-0.219961	0.219961	0.710383	1
1010	OG0004106	728.369	866.493	92.891	109.68	196.939	85.1534	252.525	325.509	92.3505	210.05	-0.302031	0.302031	1.44413	-1.44413	-0.46014	0.46014	-1.41842	1.41842	0.677564	1
1011	OG0004107	200.01	387.263	475.505	745.83	332.345	732.361	561.134	627.69	221.647	586.864	-0.664677	0.664677	-1.12826	1.12826	-0.168124	0.168124	-1.35652	1.35652	0.00430294	1
1012	OG0004108	43.4725	40.7065	520.053	529.791	484.777	472.575	283.264	299.482	423.772	507.627	-0.194754	0.194754	0.267601	-0.267601	-0.58434	0.58434	-1.89025	1.89025	0.116887	1
1013	OG0004109	23.1451	45.6531	138.228	149.657	84.4434	84.1976	63.7905	61.0404	124.676	170.236	-0.230956	0.230956	0.00847988	-0.00847988	0.128163	-0.128163	-0.898733	0.898733	0.176634	1
1014	OG0004112	517.486	679.867	324.955	254.291	484.614	492.15	182.059	159.529	370.797	295.567	1.15239	-1.15239	-0.0728824	0.0728824	0.623067	-0.623067	1.06644	-1.06644	0.0129163	1
1015	OG0004114	310.579	358.042	109.161	125.844	243.66	272.311	86.3735	101.133	104.128	109.035	-1.06787	1.06787	-0.835264	0.835264	-1.18402	1.18402	-0.346274	0.346274	0.000608063	1
1016	OG0004117	208.161	242.724	148.023	128.45	55.8326	109.955	98.2415	123.03	198.325	176.912	0.411378	-0.411378	-1.897	1.897	-0.650973	0.650973	0.331608	-0.331608	0.281251	1
1017	OG0004119	88.1211	109.217	54.345	65.8762	128.588	141.923	39.7248	43.3739	145.456	109.302	-0.957821	0.957821	-0.492271	0.492271	-0.438512	0.438512	1.41715	-1.41715	0.761531	1
1018	OG0004123	435.509	466.551	253.865	221.438	61.4322	84.0905	132.032	133.821	166.235	176.113	0.822503	-0.822503	-1.87717	1.87717	-0.0811598	0.0811598	-0.347852	0.347852	0.385906	1
1019	OG0004127	201.087	235.016	231.116	239.345	198.253	269.397	111.922	131.705	209.641	235.708	-0.186628	0.186628	-1.6233	1.6233	-0.866488	0.866488	-0.624557	0.624557	0.00818756	1
1020	OG0004128	41.3451	55.8286	69.9846	50.5804	109.555	81.3494	51.7577	52.259	321.852	326.835	1.29015	-1.29015	1.18436	-1.18436	-0.0386374	0.0386374	-0.0615762	0.0615762	0.0650083	1
1021	OG0004130	807.449	842.923	901.879	847.697	166.337	180.395	445.924	499.775	845.952	846.087	0.827176	-0.827176	-1.08299	1.08299	-1.52095	1.52095	-0.00212958	0.00212958	0.280756	1
1022	OG0004131	118.42	166.018	166.665	170.686	134.245	126.218	94.2838	106.422	158.618	194.285	-0.121954	0.121954	0.315367	-0.315367	-0.618925	0.618925	-1.0343	1.0343	0.129269	1
1023	OG0004139	209.815	223.489	1041.57	1145.87	1767.18	1674.34	638.429	798.591	344.24	573.959	-0.359857	0.359857	0.203575	-0.203575	-0.84112	0.84112	-1.88808	1.88808	0.0611372	1
1024	OG0004141	87.3406	82.4534	165.714	195.717	187.993	228.604	105.905	132.868	107.822	121.86	-0.9591	0.9591	-1.12633	1.12633	-1.3047	1.3047	-0.706172	0.706172	2.76482e-05	0.0540799
1025	OG0004142	316.579	299.736	483.091	456.801	53.0445	97.9664	57.0315	71.8297	94.1999	108.765	0.180261	-0.180261	-1.91702	1.91702	-0.740052	0.740052	-0.462454	0.462454	0.0556004	1
1026	OG0004143	73.4032	64.2157	443.591	446.18	801.984	842.05	497.997	499.654	363.177	396.59	-0.0738005	0.0738005	-0.618086	0.618086	-0.0421353	0.0421353	-1.11535	1.11535	0.0424742	1
1027	OG0004144	99.2103	95.5171	65.8757	62.3982	87.3712	114.55	31.8961	27.6095	69.9572	80.4399	0.336197	-0.336197	-1.66926	1.66926	0.893355	-0.893355	-0.864375	0.864375	0.456016	1
1028	OG0004145	768.654	447.63	418.792	407.077	813.552	766.164	227.223	223.212	695.647	172.639	0.0456951	-0.0456951	0.0966329	-0.0966329	0.0286857	-0.0286857	1.94033	-1.94033	0.164129	1
1029	OG0004147	154.25	186.736	141.546	135.752	136.991	127.902	108.295	120.914	146.151	159.544	0.354397	-0.354397	0.58203	-0.58203	-0.933859	0.933859	-0.743134	0.743134	0.518728	1
1030	OG0004149	64.9988	92.6438	48.3404	62.9214	131.402	102.117	29.1755	32.5825	64.647	84.1813	-0.959618	0.959618	0.918312	-0.918312	-0.403964	0.403964	-0.961108	0.961108	0.304735	1
1031	OG0004150	128.364	196.841	177.25	237.606	144.805	147.787	167.223	159.632	301.534	281.671	-1.18959	1.18959	-0.0833455	0.0833455	0.189898	-0.189898	0.278485	-0.278485	0.432749	1
1032	OG0004152	261.752	288.485	213.268	201.277	253.568	257.806	192.937	215.7	129.294	211.923	0.240656	-0.240656	-0.0689453	0.0689453	-0.463438	0.463438	-2.01474	2.01474	0.154413	1
1033	OG0004154	306.648	448.975	841.216	749.493	231.904	225.335	277.646	304.01	288.127	323.061	0.580952	-0.580952	0.144749	-0.144749	-0.45666	0.45666	-0.575874	0.575874	0.701809	1
1034	OG0004155	59.2259	106.455	181.354	185.809	1640.18	1487.6	155.274	178.888	311.924	388.3	-0.0811257	0.0811257	0.326144	-0.326144	-0.472444	0.472444	-0.729226	0.729226	0.193119	1
1035	OG0004156	16.4941	71.3502	46.7607	56.4902	5298.1	4663.35	71.1264	64.3188	714.58	1765.13	-0.261371	0.261371	0.176742	-0.176742	0.139409	-0.139409	-1.1751	1.1751	0.254495	1
1036	OG0004158	869.514	941.86	833.477	678.576	593.954	746.133	431.616	498.259	576.051	626.416	1.21719	-1.21719	-1.34925	1.34925	-0.851533	0.851533	-0.497658	0.497658	0.383597	1
1037	OG0004159	126.71	167.491	91.7836	94.2082	268.499	285.489	85.0548	80.2927	120.199	136.644	-0.174021	0.174021	-0.409379	0.409379	0.384456	-0.384456	-0.854651	0.854651	0.198863	1
1038	OG0004160	106.533	124.434	389.39	340.499	894.84	895.464	261.51	271.767	441.317	484.425	1.24472	-1.24472	-0.00646753	0.00646753	-0.357417	0.357417	-0.865289	0.865289	0.990642	1
1039	OG0004162	41.6628	28.7381	237.753	273.416	106.694	85.8291	70.4663	83.9963	177.317	201.236	-0.594469	0.594469	0.923443	-0.923443	-0.746361	0.746361	-0.538373	0.538373	0.419478	1
1040	OG0004163	247.322	320.124	341.697	289.23	376.968	347.002	103.764	86.0052	492.474	419.835	0.879998	-0.879998	0.438	-0.438	0.990292	-0.990292	0.842552	-0.842552	9.13838e-05	0.177559
1041	OG0004164	1081.49	1918.69	1153.15	1403.68	1628.88	1669.46	1070	1270.18	738.797	1047.32	-0.588456	0.588456	-0.073893	0.073893	-0.51371	0.51371	-1.03734	1.03734	0.00739089	1
1042	OG0004165	47.3578	114.142	178.673	232.74	187.597	187.907	155.108	218.344	48.8477	94.5022	-0.494067	0.494067	-0.00310693	0.00310693	-0.636598	0.636598	-1.19735	1.19735	0.0153383	1
1043	OG0004167	49.5433	50.7754	33.8083	63.4428	85.7082	90.2786	72.7739	85.3705	60.7197	73.2244	-1.96026	1.96026	-0.167066	0.167066	-0.512399	0.512399	-0.600566	0.600566	0.0272299	1
1044	OG0004170	105.568	124.401	456.338	462.978	499.755	496.896	285.73	281.926	616.222	565.495	-0.164691	0.164691	0.0654002	-0.0654002	0.152795	-0.152795	0.978821	-0.978821	0.193679	1
1045	OG0004178	82.6353	116.116	132.225	124.628	74.1237	103.487	74.9992	70.666	102.747	122.931	0.24523	-0.24523	-1.37065	1.37065	0.246624	-0.246624	-0.741506	0.741506	0.199315	1
1046	OG0004185	40.5051	32.5271	191.466	189.459	204.983	191.508	119.256	124.934	189.785	195.357	0.0948943	-0.0948943	0.612233	-0.612233	-0.418881	0.418881	-0.26062	0.26062	0.967303	1
1047	OG0004189	379.246	423.671	128.908	101.333	289.007	329.745	31.648	27.8232	107.36	88.4572	1.35424	-1.35424	-0.744478	0.744478	0.727231	-0.727231	1.09155	-1.09155	0.116562	1
1048	OG0004190	285.051	303.64	254.547	273.397	492.598	406.966	337.373	386.408	310.539	425.982	-0.376398	0.376398	1.00353	-1.00353	-0.714201	0.714201	-1.65238	1.65238	0.306426	1
1049	OG0004191	86.212	81.0668	475.464	394.423	147.937	146.908	84.0658	98.6997	101.819	125.874	1.19808	-1.19808	0.044863	-0.044863	-1.0297	1.0297	-1.35862	1.35862	0.510124	1
1050	OG0004192	97.4738	96.3632	78.0903	102.981	83.4425	91.575	46.2366	45.3828	58.8749	59.0606	-2.00381	2.00381	-0.677355	0.677355	0.135835	-0.135835	-0.0229463	0.0229463	0.111421	1
1051	OG0004193	424.87	747.849	515.353	324.895	1008.76	467.719	104.835	161.538	1091.4	771.531	0.829147	-0.829147	1.34043	-1.34043	-0.778672	0.778672	0.628084	-0.628084	0.166403	1
1052	OG0004196	109.808	136.85	392.254	439.233	381.272	432.796	218.322	242.148	247.967	277.665	-0.756707	0.756707	-0.847674	0.847674	-0.692991	0.692991	-0.756691	0.756691	4.36014e-08	8.58075e-05
1053	OG0004198	62.1933	76.7748	200.158	175.208	126.985	148.043	121.481	107.373	149.612	144.044	0.88384	-0.88384	-1.01815	1.01815	0.819694	-0.819694	0.252128	-0.252128	0.480697	1
1054	OG0004199	320.385	337.568	149.287	148.96	214.278	256.754	104.173	110.125	147.764	150.193	0.0236209	-0.0236209	-1.94702	1.94702	-0.599665	0.599665	-0.175972	0.175972	0.0749601	1
1055	OG0004200	2463.88	3187.42	694.459	1005.35	846.858	810.654	996.538	1209.04	883.477	1332.65	-1.22274	1.22274	0.146024	-0.146024	-0.64412	0.64412	-1.35502	1.35502	0.0190431	1
1056	OG0004201	1037.59	1198.92	288.779	309.043	807.037	870.637	314.501	235.483	200.551	310.268	-0.263329	0.263329	-0.294499	0.294499	1.11613	-1.11613	-1.66857	1.66857	0.515669	1
1057	OG0004206	64.1619	86.5113	91.1517	92.9915	172.06	199.424	59.8345	59.0294	153.306	126.676	-0.110758	0.110758	-0.81654	0.81654	0.0750822	-0.0750822	1.05437	-1.05437	0.859134	1
1058	OG0004207	450.369	693.021	1262.86	1695.57	170.666	191.958	934.523	1071.94	742.286	1328.19	-0.788989	0.788989	-0.316735	0.316735	-0.369452	0.369452	-1.52648	1.52648	0.00899007	1
1059	OG0004209	111.025	153.838	267.139	255.219	184.297	142.407	59.5873	66.223	129.061	157.138	0.205486	-0.205486	1.1546	-1.1546	-0.474948	0.474948	-0.883421	0.883421	0.99896	1
1060	OG0004210	220.915	307.563	242.334	230.132	512.035	464.332	121.646	135.831	345.633	376.812	0.293529	-0.293529	0.555308	-0.555308	-0.626173	0.626173	-0.490527	0.490527	0.7551	1
1061	OG0004211	88.4754	76.5727	196.839	185.288	301.135	324.074	152.884	143.236	123.06	120.262	0.68928	-0.68928	-0.836634	0.836634	0.742908	-0.742908	0.26225	-0.26225	0.439607	1
1062	OG0004218	327.436	223.303	94.9431	102.379	109.159	116.877	68.7347	70.4545	89.5845	94.3392	-0.403993	0.403993	-0.366026	0.366026	-0.132455	0.132455	-0.277128	0.277128	0.000452897	0.869109
1063	OG0004223	289.104	331.558	359.076	370.751	253.744	318.465	225.904	254.248	374.391	446.172	-0.19974	0.19974	-1.41225	1.41225	-0.737051	0.737051	-1.09224	1.09224	0.00338516	1
1064	OG0004224	339.22	299.469	486.407	503.197	95.6839	93.5855	314.183	334.44	1205.2	978.644	-0.284334	0.284334	0.185799	-0.185799	-0.523379	0.523379	1.7386	-1.7386	0.466819	1
1065	OG0004228	609.193	277.277	612.315	528.227	1788.65	1450.37	281.691	361.476	470.766	493.054	0.376606	-0.376606	0.533487	-0.533487	-0.633664	0.633664	-0.118124	0.118124	0.839056	1
1066	OG0004229	125.469	194.419	255.762	320.517	303.695	320.827	211.565	209.672	132.526	284.613	-0.542884	0.542884	-0.132533	0.132533	0.0217158	-0.0217158	-1.76148	1.76148	0.0789023	1
1067	OG0004235	231.937	243.681	147.55	129.144	70.9838	83.8817	40.7138	43.0555	72.961	79.9055	1.15934	-1.15934	-1.45143	1.45143	-0.48716	0.48716	-0.79169	0.79169	0.355681	1
1068	OG0004237	47.1532	66.3304	254.026	247.338	190.313	133.2	147.361	155.509	480.237	531.815	0.112531	-0.112531	1.48941	-1.48941	-0.226961	0.226961	-0.429968	0.429968	0.469086	1
1069	OG0004239	118.499	118.768	284.829	257.248	285.376	335.401	226.893	241.513	285.37	299.846	1.04492	-1.04492	-1.65491	1.65491	-0.640974	0.640974	-0.507981	0.507981	0.3071	1
1070	OG0004240	81.3677	67.3377	90.8357	101.336	152.903	130.78	71.208	89.1789	78.2667	95.1383	-0.579643	0.579643	0.827248	-0.827248	-1.18859	1.18859	-1.03211	1.03211	0.179137	1
1071	OG0004241	393.269	575.473	1250.6	1975.27	115.022	120.903	527.55	866.931	114.723	269.364	-0.858947	0.858947	-0.0953124	0.0953124	-0.930573	0.930573	-1.53947	1.53947	0.00642781	1
1072	OG0004242	98.888	99.3712	68.0794	69.6932	108.885	96.6782	70.6303	79.129	120.846	118.958	-0.298025	0.298025	1.5108	-1.5108	-1.44384	1.44384	0.200349	-0.200349	0.986422	1
1073	OG0004243	625.53	796.393	248.023	292.532	469.869	505.732	230.684	267.536	146.379	146.716	-1.04306	1.04306	-0.465664	0.465664	-0.936972	0.936972	-0.0145588	0.0145588	0.0103071	1
1074	OG0004246	97.6281	101.728	196.047	195.022	367.034	346.81	188.571	187.35	195.788	179.32	0.0988117	-0.0988117	1.06731	-1.06731	0.122399	-0.122399	1.65398	-1.65398	0.033915	1
1075	OG0004248	807.462	1152.11	660.336	737.675	578.529	601.139	308.403	395.434	270.363	590.873	-0.270547	0.270547	-0.0937339	0.0937339	-0.604724	0.604724	-1.82002	1.82002	0.0443709	1
1076	OG0004249	394.422	528.926	171.402	237.954	227.36	227.697	117.856	133.082	99.0484	135.759	-1.25286	1.25286	-0.0057112	0.0057112	-0.467578	0.467578	-1.20481	1.20481	0.0138903	1
1077	OG0004250	288.339	289.86	73.7744	81.6935	243.833	130.566	88.2683	90.1309	176.856	202.837	-0.343561	0.343561	2.04051	-2.04051	-0.0704236	0.0704236	-0.461529	0.461529	0.51042	1
1078	OG0004253	651.432	779.001	1061.11	1296.67	697.449	784.102	752.135	855.928	481.851	701.249	-0.865846	0.865846	-0.506898	0.506898	-0.559396	0.559396	-1.60718	1.60718	0.00261164	1
1079	OG0004255	39.5903	80.3671	62.4002	51.6233	309.403	334.964	35.2743	40.7282	173.623	202.837	0.541231	-0.541231	-0.227154	0.227154	-0.410923	0.410923	-0.444378	0.444378	0.438248	1
1080	OG0004256	102.306	68.8746	162.714	154.001	186.306	185.295	98.3239	104.413	223.494	229.561	0.291856	-0.291856	0.0288643	-0.0288643	-0.318629	0.318629	-0.142068	0.142068	0.716564	1
1081	OG0004257	706.459	600.683	430.091	448.238	329.911	329.6	281.46	299.145	338.009	331.116	-0.489746	0.489746	0.0111866	-0.0111866	-0.722001	0.722001	0.244179	-0.244179	0.178815	1
1082	OG0004260	112.709	141.68	119.429	109.848	146.419	156.033	133.515	150.747	106.667	119.19	0.591298	-0.591298	-0.44978	0.44978	-0.857781	0.857781	-0.78454	0.78454	0.16343	1
1083	OG0004261	71.3857	512.977	698.566	853.089	664.167	786.796	485.188	581.512	568.064	612.752	-0.273251	0.273251	-0.231901	0.231901	-0.247775	0.247775	-0.103841	0.103841	0.000200276	0.387134
1084	OG0004264	89.1703	107.606	72.1947	67.2668	171.225	167.816	64.5323	76.5901	173.392	210.857	0.456735	-0.456735	0.129978	-0.129978	-1.10442	1.10442	-1.26027	1.26027	0.196201	1
1085	OG0004265	1521.27	1648.16	1405.27	1165.1	2447.62	2526.69	633.143	677.418	2604.34	2871.64	1.66866	-1.66866	-0.283858	0.283858	-0.603293	0.603293	-0.871691	0.871691	0.957682	1
1086	OG0004269	71.4743	89.4841	133.017	134.706	119.805	135.474	71.4553	75.3228	91.6555	106.362	-0.0891418	0.0891418	-0.867348	0.867348	-0.37233	0.37233	-1.04947	1.04947	0.00892129	1
1087	OG0004272	141.218	174.107	324.261	413.931	476.596	460.726	197.8	252.621	165.309	314.012	-0.696225	0.696225	0.0970436	-0.0970436	-0.697592	0.697592	-1.77816	1.77816	0.0302079	1
1088	OG0004275	208.386	185.745	300.312	339.635	402.78	401.012	289.034	276.105	340.318	353.024	-1.46286	1.46286	0.0523787	-0.0523787	0.544655	-0.544655	-0.436309	0.436309	0.324195	1
1089	OG0004277	32.2153	54.4714	193.834	142.877	143.062	109.898	85.4661	84.3126	196.942	221.009	0.970749	-0.970749	0.840955	-0.840955	0.0435788	-0.0435788	-0.369364	0.369364	0.152745	1
1090	OG0004278	91.6841	133.508	82.4631	85.1681	100.808	110.123	33.626	34.4867	60.7197	68.1468	-0.170761	0.170761	-0.467338	0.467338	-0.133723	0.133723	-0.609891	0.609891	0.00550689	1
1091	OG0004279	102.172	141.928	90.8373	89.1676	150.148	144.829	41.1259	39.2472	83.1152	81.7788	0.118552	-0.118552	0.230463	-0.230463	0.29875	-0.29875	0.10358	-0.10358	0.00125467	1
1092	OG0004280	552.29	637.356	708.361	706.214	1952.28	1989.27	650.679	665.193	825.401	911.831	0.0364471	-0.0364471	-0.225415	0.225415	-0.264928	0.264928	-1.19498	1.19498	0.073636	1
1093	OG0004281	143.391	166.923	94.7867	87.6015	71.3485	79.5723	60.1642	53.3169	166.464	132.018	0.506431	-0.506431	-0.700493	0.700493	0.775663	-0.775663	1.48354	-1.48354	0.159626	1
1094	OG0004282	165.223	189.665	327.483	337.724	88.4756	75.7572	165.493	185.763	253.278	293.432	-0.232684	0.232684	1.17036	-1.17036	-0.872129	0.872129	-1.11	1.11	0.497771	1
1095	OG0004283	477.954	562.096	63.8204	74.3932	116.104	201.209	37.8284	34.803	110.59	134.69	-0.524497	0.524497	-1.83896	1.83896	0.285602	-0.285602	-0.673685	0.673685	0.0679836	1
1096	OG0004284	301.098	353.013	207.579	211.185	156.33	145.829	155.685	171.8	146.608	158.475	-0.170188	0.170188	0.686995	-0.686995	-0.972744	0.972744	-0.768927	0.768927	0.288923	1
1097	OG0004286	60.1987	83.6439	87.831	73.3503	101.317	106.893	48.2146	54.269	63.7234	70.0121	0.940572	-0.940572	-0.280365	0.280365	-0.618493	0.618493	-0.492302	0.492302	0.671875	1
1098	OG0004287	219.683	130.905	634.558	637.609	1621.41	1771.29	438.622	500.163	1144.47	916.08	-0.0176958	0.0176958	-0.32594	0.32594	-0.483675	0.483675	0.81778	-0.81778	0.991107	1
1099	OG0004288	246.354	331.138	93.9937	99.9442	67.1844	102.254	68.4883	79.3406	134.835	139.501	-0.244247	0.244247	-1.64761	1.64761	-0.584389	0.584389	-0.135377	0.135377	0.0367441	1
1100	OG0004292	538.791	558.124	347.544	298.79	491.988	97.7659	309.576	313.392	349.784	370.131	0.237571	-0.237571	2.10528	-2.10528	-0.0192937	0.0192937	-0.0890127	0.0890127	0.179716	1
1101	OG0004293	378.045	432.526	249.125	239.69	460.695	526.53	160.135	173.915	223.261	295.038	0.235541	-0.235541	-0.813797	0.813797	-0.503399	0.503399	-1.69	1.69	0.0492312	1
1102	OG0004294	57.0557	58.963	118.639	108.114	232.849	21.1078	79.2032	78.3885	172.928	165.153	0.117852	-0.117852	2.11679	-2.11679	0.0131251	-0.0131251	0.0583879	-0.0583879	0.163677	1
1103	OG0004295	132.305	143.97	93.5213	128.274	71.0691	82.3931	29.67	38.4009	65.1087	66.5433	-1.51166	1.51166	-0.711883	0.711883	-1.23739	1.23739	-0.105129	0.105129	0.00661964	1
1104	OG0004296	83.4111	85.6251	73.4585	89.3414	82.1958	78.394	93.7069	94.7856	44.5602	45.4312	-2.03168	2.03168	0.493008	-0.493008	-0.119171	0.119171	-0.201549	0.201549	0.272946	1
1105	OG0004302	217.932	262.759	218.95	164.776	56.2335	80.5748	162.114	162.066	405.196	408.341	1.21962	-1.21962	-1.53702	1.53702	0.00127836	-0.00127836	-0.0333994	0.0333994	0.833902	1
1106	OG0004303	27.4855	47.4755	83.5673	91.2534	140.674	117.448	48.2138	61.0383	66.494	70.552	-0.301326	0.301326	0.616705	-0.616705	-0.804523	0.804523	-0.202939	0.202939	0.437661	1
1107	OG0004309	173.544	204.74	229.536	225.961	269.487	266.724	157.829	158.999	210.793	226.357	0.184224	-0.184224	0.120943	-0.120943	-0.0866544	0.0866544	-0.835546	0.835546	0.387829	1
1108	OG0004311	179.368	203.198	201.892	232.392	394.03	349.208	220.265	238.809	309.839	291.286	-1.21506	1.21506	1.04339	-1.04339	-0.698864	0.698864	0.533979	-0.533979	0.828291	1
1109	OG0004312	145.797	214.474	271.398	344.674	182.424	184.562	180.164	211.363	138.529	219.406	-0.768021	0.768021	-0.0376142	0.0376142	-0.51456	0.51456	-1.45904	1.45904	0.0160877	1
1110	OG0004313	459.89	466.913	413.263	410.903	143.095	166.585	126.015	143.13	496.163	256.555	0.0182199	-0.0182199	-0.482543	0.482543	-0.404546	0.404546	2.02505	-2.02505	0.513655	1
1111	OG0004315	169.37	233.423	69.1931	79.7815	98.5677	162.784	50.7687	55.2211	94.8902	100.748	-0.493415	0.493415	-1.70574	1.70574	-0.291626	0.291626	-0.207852	0.207852	0.0339698	1
1112	OG0004317	52.7337	67.4162	85.7837	98.7292	123.909	77.1717	69.4756	70.5613	112.67	114.38	-0.547132	0.547132	1.81257	-1.81257	-0.0604605	0.0604605	-0.0587079	0.0587079	0.466602	1
1113	OG0004318	24.8343	48.3879	453.705	317.39	835.71	864.504	225.244	221.941	404.505	407.545	1.02034	-1.02034	-0.0977463	0.0977463	0.0426292	-0.0426292	-0.0216022	0.0216022	0.251682	1
1114	OG0004319	207.378	191.707	447.86	412.469	879.793	809.368	261.344	277.054	569.124	626.146	0.969618	-0.969618	0.982714	-0.982714	-0.687782	0.687782	-1.12447	1.12447	0.931262	1
1115	OG0004323	520.262	590.087	178.352	154.003	300.434	354.165	100.467	110.442	202.248	224.756	1.07056	-1.07056	-1.19943	1.19943	-0.691121	0.691121	-0.770239	0.770239	0.305496	1
1116	OG0004326	311.015	409.568	371.714	343.634	411.155	504.763	191.289	224.057	282.371	318.021	0.414069	-0.414069	-1.07808	1.07808	-0.832207	0.832207	-0.626354	0.626354	0.0622151	1
1117	OG0004327	28.5928	53.7689	69.1931	74.7409	110.447	112.35	31.7304	36.0746	83.1175	79.6382	-0.25913	0.25913	-0.0574346	0.0574346	-0.430736	0.430736	0.143721	-0.143721	0.136964	1
1118	OG0004331	2034.31	2559.28	413.473	506.388	184.679	33.6626	197.882	198.563	196.4	389.035	-0.274368	0.274368	1.8787	-1.8787	-0.00466383	0.00466383	-0.893772	0.893772	0.690538	1
1119	OG0004332	102.388	43.1129	389.883	408.989	325.103	331.099	1463.47	1504.3	947.54	1075.39	-0.122759	0.122759	-0.0469049	0.0469049	-0.0706066	0.0706066	-0.324388	0.324388	0.0194653	1
1120	OG0004333	34.2405	34.6706	156.988	204.239	302.756	241.821	81.1804	79.128	203.412	152.857	-1.24133	1.24133	1.06186	-1.06186	0.121497	-0.121497	1.34659	-1.34659	0.464378	1
1121	OG0004334	39.4788	41.5764	184.675	196.412	239.816	257.218	101.208	105.576	158.616	188.139	-0.63644	0.63644	-0.723461	0.723461	-0.43643	0.43643	-1.7593	1.7593	0.00542265	1
1122	OG0004335	151.043	161.582	67.6134	80.1274	110.605	114.82	29.2579	35.5446	45.4838	52.914	-1.16533	1.16533	-0.257233	0.257233	-1.3347	1.3347	-1.03889	1.03889	0.00134445	1
1123	OG0004338	71.3292	85.6993	120.06	124.278	120.144	117.127	58.7631	64.8488	184.477	215.673	-0.278186	0.278186	0.204843	-0.204843	-0.793201	0.793201	-1.25604	1.25604	0.0552706	1
1124	OG0004339	777.987	928.105	1189.71	1442.84	1367.43	1400.23	656.531	836.992	1081.91	1352.52	-0.971486	0.971486	-0.119722	0.119722	-1.22078	1.22078	-1.12306	1.12306	0.00292075	1
1125	OG0004344	160.054	211.949	163.187	146.873	268.163	335.016	55.178	57.2205	185.396	227.418	0.52496	-0.52496	-1.10582	1.10582	-0.181305	0.181305	-1.01562	1.01562	0.15309	1
1126	OG0004346	172.015	228.519	145.495	144.966	275.591	284.316	79.1184	79.4464	133.443	163.055	0.0222657	-0.0222657	-0.190446	0.190446	-0.0252854	0.0252854	-1.22063	1.22063	0.13838	1
1127	OG0004347	110.012	93.2856	103.379	99.4662	469.478	493.257	100.135	93.4093	360.16	314.534	0.351753	-0.351753	-0.450398	0.450398	0.633724	-0.633724	1.23317	-1.23317	0.124015	1
1128	OG0004353	51.8708	54.9729	136.176	151.218	119.233	125.683	88.7628	90.4483	170.391	218.877	-0.787478	0.787478	-0.396203	0.396203	-0.141511	0.141511	-1.87404	1.87404	0.0252309	1
1129	OG0004355	95.7694	137.471	319.111	280.197	438.201	446.556	184.45	204.064	410.28	416.107	0.698653	-0.698653	-0.101608	0.101608	-0.543192	0.543192	-0.0758727	0.0758727	0.976912	1
1130	OG0004357	1273.48	1535.16	428.587	414.723	575.366	540.334	257.799	269.758	529.182	589.267	0.301972	-0.301972	0.576756	-0.576756	-0.416415	0.416415	-0.986803	0.986803	0.618998	1
1131	OG0004359	926.873	891.709	319.742	354.063	511.476	505.054	337.001	332.49	300.837	323.363	-1.63714	1.63714	0.203071	-0.203071	0.216556	-0.216556	-1.15991	1.15991	0.12681	1
1132	OG0004360	141.189	190.082	100.316	90.386	146.018	175.679	67.3344	85.4763	104.59	152.058	0.38739	-0.38739	-0.685973	0.685973	-0.883266	0.883266	-1.37604	1.37604	0.0509862	1
1133	OG0004361	206.073	250.743	354.986	419.508	245.434	245.581	291.073	284.811	115.446	177.719	-0.711228	0.711228	-0.00255095	0.00255095	0.0928315	-0.0928315	-1.81346	1.81346	0.0981257	1
1134	OG0004362	803.76	646.093	1055.27	1018.91	461.577	447.897	455.64	470.857	980.096	932.676	0.323162	-0.323162	0.27727	-0.27727	-0.302753	0.302753	0.456985	-0.456985	0.163734	1
1135	OG0004366	39.6407	65.9287	293.995	302.787	242.726	283.97	182.552	213.162	336.621	266.441	-0.105426	0.105426	-0.560348	0.560348	-0.55352	0.55352	0.832745	-0.832745	0.691037	1
1136	OG0004371	567.828	631.945	376.295	437.669	137.04	121.159	346.728	397.971	336.164	391.777	-1.05706	1.05706	0.862312	-0.862312	-0.964683	0.964683	-1.07104	1.07104	0.147159	1
1137	OG0004373	484.785	564.448	478.663	490.858	983.453	1019.96	487.659	532.957	524.335	551.059	-0.283751	0.283751	-0.411075	0.411075	-1.00126	1.00126	-0.560598	0.560598	0.00221081	1
1138	OG0004376	245.645	312.936	700.781	627.651	420.727	485.649	199.201	194.226	700.498	649.126	0.749411	-0.749411	-0.975091	0.975091	0.172153	-0.172153	0.518177	-0.518177	0.68264	1
1139	OG0004377	47.4601	125.252	241.699	269.067	523.459	654.462	116.948	105.364	309.151	437.473	-0.227166	0.227166	-0.4715	0.4715	0.22091	-0.22091	-0.728648	0.728648	0.07924	1
1140	OG0004379	373.601	485.246	301.102	265.589	247.281	331.857	216.097	229.56	249.583	267.242	0.632086	-0.632086	-1.47299	1.47299	-0.30471	0.30471	-0.344629	0.344629	0.267035	1
1141	OG0004382	105.533	154.592	53.3956	71.9581	158.81	167.917	33.3788	29.4089	49.4087	54.7874	-1.23271	1.23271	-0.232036	0.232036	0.526333	-0.526333	-0.429715	0.429715	0.229221	1
1142	OG0004385	135.651	168.231	402.834	467.567	624.603	541.435	358.1	429.709	295.993	457.522	-0.571048	0.571048	0.547654	-0.547654	-0.697924	0.697924	-1.64597	1.64597	0.11172	1
1143	OG0004387	246.209	338.583	161.291	148.611	150.71	198.13	88.9251	98.1708	252.816	180.92	0.316892	-0.316892	-1.05281	1.05281	-0.382723	0.382723	1.28376	-1.28376	0.910809	1
1144	OG0004391	332.989	391.116	76.46	80.9965	73.2365	101.427	56.1266	55.75	98.1225	132.825	-0.25847	0.25847	-1.44794	1.44794	0.0301962	-0.0301962	-1.34801	1.34801	0.0293722	1
1145	OG0004398	156.133	188.903	158.291	150.523	273.173	280.6	66.3446	81.7737	120.056	171.837	0.233666	-0.233666	-0.124579	0.124579	-0.967611	0.967611	-1.64782	1.64782	0.0812763	1
1146	OG0004399	7.11383	59.9745	107.109	130.71	123.532	120.538	62.307	72.7797	96.2801	75.0978	-0.260691	0.260691	0.0322197	-0.0322197	-0.203652	0.203652	0.324686	-0.324686	0.785149	1
1147	OG0004400	54.6641	67.575	60.8204	49.7096	63.1315	93.7723	40.7954	44.3239	99.5078	86.0547	0.827719	-0.827719	-1.60799	1.60799	-0.341331	0.341331	0.596967	-0.596967	0.748892	1
1148	OG0004403	41.1557	59.4588	212.794	181.638	17.8048	108.799	150.904	146.198	64.1852	50.5088	0.221872	-0.221872	-2.01879	2.01879	0.0444888	-0.0444888	0.334931	-0.334931	0.403722	1
1149	OG0004404	545.679	610.905	254.021	297.401	451.591	493.636	269.255	293.561	169.135	182.978	-1.37369	1.37369	-0.776718	0.776718	-0.754104	0.754104	-0.686496	0.686496	0.000211387	0.407977
1150	OG0004407	82.985	59.1605	84.8311	62.3999	101.586	143.654	54.5607	50.5664	170.853	149.121	1.09708	-1.09708	-1.23521	1.23521	0.273593	-0.273593	0.489057	-0.489057	0.671487	1
1151	OG0004408	45.684	37.9418	127.172	106.547	155.544	132.06	113.9	121.442	118.69	132.012	1.14184	-1.14184	1.05655	-1.05655	-0.414681	0.414681	-0.68764	0.68764	0.450271	1
1152	OG0004410	83.4493	81.9224	208.055	173.468	353.357	401.904	116.786	113.933	187.478	234.104	1.22066	-1.22066	-0.865523	0.865523	0.1665	-0.1665	-1.48919	1.48919	0.58633	1
1153	OG0004414	68.8688	137.969	500.148	738.368	186.513	184.218	314.172	450.018	85.6572	122.397	-0.88737	0.88737	0.0285556	-0.0285556	-0.820114	0.820114	-0.81468	0.81468	0.00676331	1
1154	OG0004418	973.759	833.387	525.669	586.285	336.53	380.121	644.663	729.829	272.672	322.294	-0.75434	0.75434	-0.841706	0.841706	-0.857412	0.857412	-1.15413	1.15413	6.35826e-06	0.0124749
1155	OG0004419	561.003	607.898	254.659	264.338	1683.64	1515.15	271.233	332.384	199.713	250.938	-0.236768	0.236768	0.668758	-0.668758	-1.28625	1.28625	-1.44319	1.44319	0.150787	1
1156	OG0004420	79.1089	63.6158	155.448	173.293	285.246	359.56	122.966	139.745	167.161	204.708	-0.55998	0.55998	-1.18889	1.18889	-0.658883	0.658883	-1.04157	1.04157	0.000189053	0.365628
1157	OG0004425	1797.21	1647.27	486.249	322.602	980.458	914.481	284.42	275.26	913.138	616.261	1.49888	-1.49888	0.257944	-0.257944	0.121248	-0.121248	1.43809	-1.43809	0.0194425	1
1158	OG0004427	36.5099	48.7342	59.7146	60.1403	107.294	107.709	58.1878	59.0294	51.4844	71.3537	-0.0348295	0.0348295	-0.0188999	0.0188999	-0.0704072	0.0704072	-1.58617	1.58617	0.168589	1
1159	OG0004429	57.1351	126.83	276.929	421.328	207.647	194.955	336.507	383.797	149.609	300.915	-0.79514	0.79514	0.121209	-0.121209	-0.252432	0.252432	-1.29131	1.29131	0.0444226	1
1160	OG0004430	537.794	701.984	572.028	609.053	459.666	430.197	403.075	500.014	173.626	227.421	-0.300006	0.300006	0.316919	-0.316919	-1.02727	1.02727	-1.28371	1.28371	0.06665	1
1161	OG0004433	141.223	217.201	82.6226	90.9057	72.3494	74.8454	59.8337	66.4356	67.1867	71.3537	-0.447767	0.447767	-0.159064	0.159064	-0.490456	0.490456	-0.282149	0.282149	0.000700343	1
1162	OG0004436	103.17	123.083	546.119	502.85	120.772	135.526	247.499	306.255	643.24	826.049	0.440275	-0.440275	-0.614447	0.614447	-1.13251	1.13251	-1.32801	1.32801	0.0568993	1
1163	OG0004438	45.5984	46.5947	38.8651	42.2355	217.276	208.641	26.7846	24.5438	46.1787	49.1726	-1.22888	1.22888	0.599445	-0.599445	1.29091	-1.29091	-0.928431	0.928431	0.880979	1
1164	OG0004439	38.2525	44.9655	139.808	175.902	174.261	118.102	124.532	149.795	80.8133	101.552	-0.868984	0.868984	1.46005	-1.46005	-0.699993	0.699993	-0.864388	0.864388	0.56758	1
1165	OG0004441	35.783	57.6719	101.896	113.674	121.038	106.602	45.7421	60.722	88.4255	97.808	-0.39943	0.39943	0.46362	-0.46362	-1.02861	1.02861	-0.368304	0.368304	0.17461	1
1166	OG0004442	38.6771	57.9955	256.868	229.785	239.333	219.048	157.664	156.248	194.634	219.406	0.535568	-0.535568	0.425864	-0.425864	0.0434037	-0.0434037	-0.57579	0.57579	0.567643	1
1167	OG0004443	36.7589	41.6353	144.231	145.832	168.781	141.047	86.2078	95.4203	159.77	168.897	-0.094749	0.094749	1.53734	-1.53734	-0.871116	0.871116	-0.476919	0.476919	0.951653	1
1168	OG0004444	193.654	200.534	174.405	167.559	153.187	197.622	66.5927	72.4644	127.447	122.664	0.308932	-0.308932	-1.95458	1.95458	-0.651597	0.651597	0.295078	-0.295078	0.233413	1
1169	OG0004446	390.085	598.233	1064.59	1397.13	1047.89	913.457	1387.8	1873.12	579.283	1108.52	-0.661285	0.661285	0.335526	-0.335526	-0.728571	0.728571	-1.53503	1.53503	0.0540329	1
1170	OG0004447	445.78	459.311	304.412	236.878	499.804	495.116	211.863	218.923	444.448	436.139	2.08137	-2.08137	0.0785971	-0.0785971	-0.27341	0.27341	0.157399	-0.157399	0.223025	1
1171	OG0004448	292.18	372.587	403.785	435.757	353.667	371.035	265.795	340.106	259.405	410.051	-0.281543	0.281543	-0.177178	0.177178	-0.906712	0.906712	-1.66361	1.66361	0.0203769	1
1172	OG0004450	1123.96	1416.36	372.19	481.47	105.049	116.415	321.87	347.352	162.31	329.515	-0.702807	0.702807	-0.281765	0.281765	-0.209046	0.209046	-1.86645	1.86645	0.030144	1
1173	OG0004452	355.074	489.643	479.932	554.819	676.703	632.318	394.715	432.106	651.542	820.699	-0.708063	0.708063	0.331735	-0.331735	-0.442444	0.442444	-1.12412	1.12412	0.0662222	1
1174	OG0004455	187.704	247.426	206.156	271.497	564.94	543.386	273.21	317.468	113.829	197.222	-0.854156	0.854156	0.121431	-0.121431	-0.467856	0.467856	-1.67402	1.67402	0.0355555	1
1175	OG0004457	41.4719	44.9477	167.454	262.462	181.961	124.916	66.0982	79.5522	154.229	185.733	-1.46692	1.46692	1.2339	-1.2339	-0.613154	0.613154	-0.61513	0.61513	0.399435	1
1176	OG0004458	67.7051	62.2246	208.685	187.547	174.181	193.79	145.96	148.738	211.248	219.954	1.26829	-1.26829	-1.26694	1.26694	-0.22414	0.22414	-0.480009	0.480009	0.655749	1
1177	OG0004461	164.143	154.032	482.297	395.084	272.94	333.442	250.218	293.455	309.839	403.274	1.00141	-1.00141	-1.00518	1.00518	-0.801189	0.801189	-1.31999	1.31999	0.200071	1
1178	OG0004462	329.997	353.947	183.569	147.222	124.879	136.427	77.4725	76.5901	248.66	314.277	1.37176	-1.37176	-0.551732	0.551732	0.0715008	-0.0715008	-1.45521	1.45521	0.748534	1
1179	OG0004463	253.248	290.569	339.487	332.858	795.523	808.138	307.167	356.082	292.528	389.105	0.120001	-0.120001	-0.0957338	0.0957338	-0.897547	0.897547	-1.72432	1.72432	0.0713411	1
1180	OG0004464	195.6	239.278	59.3987	59.7927	210.274	152.836	30.8238	29.1973	104.59	110.371	-0.0366657	0.0366657	1.75452	-1.75452	0.300563	-0.300563	-0.298315	0.298315	0.232689	1
1181	OG0004465	162.926	199.662	158.451	157.651	166.575	98.7986	148.598	163.972	240.579	261.895	0.0190058	-0.0190058	1.91887	-1.91887	-0.369535	0.369535	-0.318724	0.318724	0.44644	1
1182	OG0004472	131.025	175.247	307.734	429.675	423.715	352.243	499.303	655.732	240.346	404.068	-0.938979	0.938979	0.523013	-0.523013	-0.76902	0.76902	-1.44264	1.44264	0.0682129	1
1183	OG0004473	290.326	333.511	151.816	131.579	288.223	270.58	80.2747	90.132	160.696	176.914	1.17779	-1.17779	0.520744	-0.520744	-0.954081	0.954081	-0.792318	0.792318	0.974904	1
1184	OG0004477	242.173	258.75	150.078	138.356	308.079	329.74	92.5094	104.195	251.661	188.678	0.516253	-0.516253	-0.431392	0.431392	-0.754654	0.754654	1.81691	-1.81691	0.508422	1
1185	OG0004480	73.3176	85.5409	63.98	63.6149	108.264	133.433	50.6863	52.4706	76.6528	96.4745	0.0349352	-0.0349352	-1.27158	1.27158	-0.211215	0.211215	-1.39804	1.39804	0.0327658	1
1186	OG0004481	21.3445	69.2521	50.3941	66.2239	159.092	197.724	78.9552	79.4464	58.1823	67.0778	-0.513189	0.513189	-0.409322	0.409322	-0.0117247	0.0117247	-0.26849	0.26849	0.00783804	1
1187	OG0004484	76.4607	91.3889	187.831	153.481	330.172	317.537	68.1586	72.5702	166.93	166.489	1.53263	-1.53263	0.297087	-0.297087	-0.477401	0.477401	0.0201286	-0.0201286	0.299811	1
1188	OG0004485	324.434	422.2	419.424	364.494	559.214	371.67	271.316	269.124	751.754	707.121	0.589421	-0.589421	1.69469	-1.69469	0.0341055	-0.0341055	0.257352	-0.257352	0.0483304	1
1189	OG0004486	12.5676	47.3636	257.027	365.014	256.418	266.807	256.976	287.108	121.906	164.891	-0.587316	0.587316	-0.0671694	0.0671694	-0.187365	0.187365	-0.507072	0.507072	0.00873358	1
1190	OG0004487	27.9422	46.8831	62.8741	64.6595	96.2503	93.3329	59.8337	67.174	225.468	296.404	-0.101076	0.101076	0.111107	-0.111107	-0.417273	0.417273	-0.981381	0.981381	0.0843671	1
1191	OG0004488	110.842	113.864	84.5167	77.3481	155.181	145.26	53.6541	60.7231	59.5676	59.0606	1.11727	-1.11727	0.83305	-0.83305	-1.55917	1.55917	0.107819	-0.107819	0.778714	1
1192	OG0004489	838.25	1235.89	329.38	396.65	740.295	705.189	251.784	309.11	546.151	497.509	-0.812309	0.812309	0.212926	-0.212926	-0.896041	0.896041	0.408611	-0.408611	0.300377	1
1193	OG0004490	124.148	59.4524	121.799	104.637	176.38	163.726	102.609	109.49	198.097	210.052	0.440513	-0.440513	0.216246	-0.216246	-0.188572	0.188572	-0.170256	0.170256	0.518501	1
1194	OG0004492	151.935	147.418	320.529	374.4	403.445	379.382	234.557	280.125	122.134	252.007	-0.446714	0.446714	0.17713	-0.17713	-0.510196	0.510196	-2.0003	2.0003	0.0774269	1
1195	OG0004496	147.503	215.786	154.342	192.762	103.267	146.046	25.4668	30.2563	52.4102	66.8106	-0.746259	0.746259	-1.15684	1.15684	-0.579493	0.579493	-0.814351	0.814351	7.28125e-05	0.141693
1196	OG0004497	1081.75	1191.87	512.473	550.647	193.82	235.091	403.347	408.552	353.307	418.803	-0.536858	0.536858	-1.43866	1.43866	-0.0958531	0.0958531	-1.26826	1.26826	0.00946882	1
1197	OG0004498	101.409	91.4358	305.998	338.593	374.035	59.1017	115.631	89.602	605.373	574.039	-0.144552	0.144552	2.07847	-2.07847	0.362539	-0.362539	0.0759439	-0.0759439	0.148388	1
1198	OG0004499	115.151	133.546	73.934	78.5648	84.8417	83.8845	73.5973	73.7339	123.473	133.99	-0.71599	0.71599	0.133767	-0.133767	-0.0218644	0.0218644	-0.963102	0.963102	0.0817581	1
1199	OG0004500	641.808	791.488	199.997	181.464	229.372	235.014	120.576	126.098	203.869	229.027	0.783738	-0.783738	-0.195991	0.195991	-0.361126	0.361126	-0.937501	0.937501	0.508643	1
1200	OG0004510	351.273	390.824	188.305	198.672	215.22	280.633	100.96	96.4782	170.391	138.432	-0.31676	0.31676	-1.55986	1.55986	0.26843	-0.26843	1.22366	-1.22366	0.823093	1
1201	OG0004511	150.211	219.355	190.047	237.434	271.769	225.478	195.246	220.459	220.495	297.173	-0.823302	0.823302	0.691413	-0.691413	-0.450462	0.450462	-1.10012	1.10012	0.1817	1
1202	OG0004515	21.7447	41.143	385.935	338.072	109.079	132.568	71.7849	67.8087	154.689	142.443	0.42002	-0.42002	-0.617596	0.617596	0.180974	-0.180974	0.26185	-0.26185	0.721084	1
1203	OG0004516	596.384	551.431	976.445	1159.18	317.333	313.546	994.852	1147.27	1100.85	782.761	-0.880763	0.880763	0.0617981	-0.0617981	-0.732389	0.732389	1.73825	-1.73825	0.915981	1
1204	OG0004518	52.416	52.8625	267.768	244.21	182.083	173.96	193.597	205.332	271.979	279.803	1.59991	-1.59991	0.793246	-0.793246	-1.02286	1.02286	-0.493004	0.493004	0.622337	1
1205	OG0004519	69.2369	72.2594	244.228	248.206	96.3305	110.994	45.33	39.354	108.745	99.4088	-0.153166	0.153166	-1.3411	1.3411	1.33811	-1.33811	0.850527	-0.850527	0.69312	1
1206	OG0004521	710.88	677.754	914.834	812.591	1073.33	1124.51	655.691	683.712	1352.88	1192.38	1.32136	-1.32136	-0.519882	0.519882	-0.467053	0.467053	1.40782	-1.40782	0.294842	1
1207	OG0004522	537.873	647.508	506.312	513.259	809.585	792.614	476.696	506.826	314	429.189	-0.0787694	0.0787694	0.122449	-0.122449	-0.354141	0.354141	-1.79172	1.79172	0.137049	1
1208	OG0004523	133.032	127.357	968.048	1211.64	975.914	996.976	717.354	868.937	429.212	611.985	-1.02951	1.02951	-0.0983485	0.0983485	-0.880317	0.880317	-1.61714	1.61714	0.00637188	1
1209	OG0004532	289.562	396.271	267.45	284.363	154.072	217.326	93.4605	107.057	268.285	303.053	-0.260158	0.260158	-1.44568	1.44568	-0.575566	0.575566	-0.516544	0.516544	0.00861376	1
1210	OG0004533	63.5021	56.1596	148.761	114.07	96.3383	80.8687	66.0973	65.7998	174.316	179.32	1.64381	-1.64381	1.08722	-1.08722	0.0280934	-0.0280934	-0.176219	0.176219	0.079395	1
1211	OG0004536	231.025	392.042	397.976	483.393	431.72	521.827	320.025	281.396	242.89	279.266	-0.670245	0.670245	-0.653534	0.653534	0.444204	-0.444204	-0.481787	0.481787	0.119188	1
1212	OG0004538	261.028	308.44	636.482	819.019	1061.85	1091.23	505.132	559.194	493.623	539.028	-1.60839	1.60839	-0.17503	0.17503	-0.651433	0.651433	-0.563893	0.563893	0.0130915	1
1213	OG0004539	1067.99	1697.47	625.108	723.77	898.061	916.228	459.885	563.634	395.963	572.968	-0.488446	0.488446	-0.0668696	0.0668696	-0.676904	0.676904	-1.21992	1.21992	0.011025	1
1214	OG0004542	448.186	369.355	210.265	193.455	186.423	207.96	166.975	187.668	158.851	179.584	0.607026	-0.607026	-0.79618	0.79618	-0.850699	0.850699	-0.893125	0.893125	0.109506	1
1215	OG0004544	37.3514	26.5975	270.924	290.101	386.895	418.612	207.825	237.685	100.496	153.603	-0.257693	0.257693	-0.29686	0.29686	-0.505309	0.505309	-1.57568	1.57568	0.0239455	1
1216	OG0004547	184.657	197.825	107.738	116.457	68.7388	78.957	74.0926	81.7737	71.5711	70.552	-0.826485	0.826485	-1.47025	1.47025	-1.04727	1.04727	0.152388	-0.152388	0.0167706	1
1217	OG0004549	294.511	406.332	357.815	473.473	310.143	305.548	207.608	267.749	233.883	347.685	-0.937224	0.937224	0.0502798	-0.0502798	-0.852268	0.852268	-1.31816	1.31816	0.0097399	1
1218	OG0004550	48.7216	62.1088	1039.21	1242.93	112.017	120.546	65.274	42.1034	83.1175	80.4399	-0.711994	0.711994	-0.292523	0.292523	1.72112	-1.72112	0.130575	-0.130575	0.593617	1
1219	OG0004554	43.0526	19.1988	181.671	212.921	295.688	271.575	200.437	220.674	158.385	198.561	-0.407587	0.407587	0.218773	-0.218773	-0.247332	0.247332	-0.579281	0.579281	0.0812249	1
1220	OG0004555	216.866	272.67	98.1026	110.199	154.522	163.418	213.519	221.54	187.331	209.16	-0.859965	0.859965	-0.414356	0.414356	-0.273038	0.273038	-0.815287	0.815287	0.00122548	1
1221	OG0004557	130.622	80.8924	929.366	941.559	632.026	645.183	661.476	752.784	784.766	861.811	-0.0556178	0.0556178	-0.0879183	0.0879183	-0.55099	0.55099	-0.399329	0.399329	0.0184878	1
1222	OG0004558	253.689	270.156	148.497	101.161	212.488	181.914	64.0386	61.5704	249.35	248.006	1.93199	-1.93199	0.78991	-0.78991	0.200221	-0.200221	0.0275359	-0.0275359	0.0516264	1
1223	OG0004560	534.379	854.057	546.991	617.62	809.859	821.137	378.045	414.474	262.224	414.91	-0.388434	0.388434	-0.0442895	0.0442895	-0.294408	0.294408	-1.44423	1.44423	0.0475773	1
1224	OG0004561	195.949	145.61	292.256	178.683	362.836	371.961	154.9	124.552	413.743	322.024	1.56128	-1.56128	-0.0803957	0.0803957	0.703067	-0.703067	0.807022	-0.807022	0.019838	1
1225	OG0004562	647.587	497.575	242.492	296.356	100.166	154.192	121.317	135.831	130.446	142.437	-0.762283	0.762283	-1.61972	1.61972	-0.430407	0.430407	-0.335102	0.335102	0.00889633	1
1226	OG0004563	228.783	240.273	176.142	112.633	268.155	304.82	82.087	69.6092	237.808	186.802	1.71204	-1.71204	-0.498127	0.498127	0.640318	-0.640318	0.935113	-0.935113	0.0748324	1
1227	OG0004573	20.0174	45.8847	269.872	305.097	194.598	169.181	228.126	287.109	72.9587	126.943	-0.260584	0.260584	0.29719	-0.29719	-0.486925	0.486925	-1.14865	1.14865	0.107643	1
1228	OG0004576	89.9262	71.5494	153.71	150.005	115.863	77.743	103.021	122.29	76.6528	85.2503	0.103925	-0.103925	1.6774	-1.6774	-0.728602	0.728602	-0.452396	0.452396	0.706708	1
1229	OG0004577	234.266	275.534	279.776	234.999	385.573	383.914	113.489	121.235	229.264	238.65	1.47663	-1.47663	0.0365959	-0.0365959	-0.560222	0.560222	-0.340548	0.340548	0.653117	1
1230	OG0004578	151.5	160.327	84.5167	90.9075	86.3004	100.735	78.0486	88.0152	88.8896	115.179	-0.459525	0.459525	-0.973477	0.973477	-0.757041	0.757041	-1.62498	1.62498	0.00158123	1
1231	OG0004579	59.6505	72.2704	149.604	128.101	114.438	124.095	92.3075	99.9681	675.328	491.189	0.78946	-0.78946	-0.412765	0.412765	-0.406205	0.406205	1.60938	-1.60938	0.301062	1
1232	OG0004581	247.764	317.351	200.628	249.424	617.793	775.87	238.019	294.299	114.284	217.535	-0.598285	0.598285	-0.625895	0.625895	-0.583402	0.583402	-1.71705	1.71705	0.00423666	1
1233	OG0004582	71.3063	85.8148	618.473	812.939	483.228	537.689	427.99	522.696	597.754	867.196	-1.06243	1.06243	-0.417176	0.417176	-0.779044	0.779044	-1.43835	1.43835	0.000929834	1
1234	OG0004583	110.086	176.209	360.656	488.249	1105.19	1080.24	139.449	182.379	208.951	386.435	-0.745897	0.745897	0.0566443	-0.0566443	-0.66198	0.66198	-1.47936	1.47936	0.0189067	1
1235	OG0004586	127.829	155.568	107.581	126.712	73.7667	94.1458	80.1914	86.4273	98.5866	146.182	-0.6538	0.6538	-0.971794	0.971794	-0.299673	0.299673	-1.55696	1.55696	0.00363728	1
1236	OG0004591	82.9056	127.147	112.32	102.901	137.803	151.166	45.4124	48.2391	39.0191	31.5319	0.377187	-0.377187	-0.398507	0.398507	-0.26012	0.26012	0.914582	-0.914582	0.488543	1
1237	OG0004592	97.4876	103.742	330.479	263.877	704.67	651.46	155.932	177.511	457.608	403.632	1.56137	-1.56137	0.546715	-0.546715	-0.901723	0.901723	0.873252	-0.873252	0.206278	1
1238	OG0004593	247.191	296.622	429.849	425.154	636.4	645.615	322.577	374.592	427.596	614.393	0.0542845	-0.0542845	-0.0710575	0.0710575	-0.737551	0.737551	-1.77217	1.77217	0.0764751	1
1239	OG0004594	96.7468	102.613	209.947	213.794	66.3412	104.344	32.1425	32.0536	100.434	94.0693	-0.0847692	0.0847692	-2.07936	2.07936	0.0129317	-0.0129317	0.30559	-0.30559	0.276869	1
1240	OG0004597	102.227	107.026	170.373	160.423	150.614	110.148	46.5654	56.1732	85.6572	97.8134	0.324555	-0.324555	1.67452	-1.67452	-1.00909	1.00909	-0.714942	0.714942	0.877957	1
1241	OG0004598	198.48	316.137	179.302	253.771	89.042	106.344	95.1097	119.647	85.8881	177.449	-0.771366	0.771366	-0.397225	0.397225	-0.512531	0.512531	-1.5597	1.5597	0.00468448	1
1242	OG0004599	253.674	283.077	678.186	371.968	587.765	698.811	158.817	157.836	784.537	647.528	1.91221	-1.91221	-0.566013	0.566013	0.0203146	-0.0203146	0.627398	-0.627398	0.23219	1
1243	OG0004600	109.204	108.972	204.892	183.899	343.021	353.017	62.3078	61.9936	136.451	156.604	1.29212	-1.29212	-0.343662	0.343662	0.0604957	-0.0604957	-1.6456	1.6456	0.722814	1
1244	OG0004601	55.0871	47.2219	46.2867	42.0652	127.766	118.379	39.8073	34.0625	72.497	66.7865	0.768926	-0.768926	0.613673	-0.613673	1.25151	-1.25151	0.659779	-0.659779	0.000209539	0.40462
1245	OG0004602	579.435	779.884	728.894	897.587	806.59	763.983	503.648	556.339	510.018	761.638	-0.80413	0.80413	0.21033	-0.21033	-0.385397	0.385397	-1.5341	1.5341	0.0516417	1
1246	OG0004603	34.7383	41.6779	242.492	262.464	94.7295	61.3595	62.5534	77.5422	39.9403	54.7793	-0.277361	0.277361	1.49921	-1.49921	-0.750276	0.750276	-1.09861	1.09861	0.714102	1
1247	OG0004609	160.73	129.983	117.849	135.75	223.804	240.068	72.1138	74.5791	95.1234	114.38	-0.926344	0.926344	-0.460137	0.460137	-0.220557	0.220557	-1.20624	1.20624	0.00424948	1
1248	OG0004610	580.475	495.099	161.609	179.9	187.548	259.652	119.999	133.398	125.138	137.63	-0.566511	0.566511	-1.70542	1.70542	-0.559316	0.559316	-0.502835	0.502835	0.00671831	1
1249	OG0004612	59.6169	83.7402	201.418	196.059	100.448	129.679	79.1192	94.574	225.8	201.231	0.121016	-0.121016	-1.14007	1.14007	-0.798618	0.798618	0.516409	-0.516409	0.279228	1
1250	OG0004613	174.866	204.051	121.483	100.121	417.649	389.979	88.2683	91.1888	214.256	186.535	1.39629	-1.39629	0.49629	-0.49629	-0.235739	0.235739	1.00188	-1.00188	0.0370583	1
1251	OG0004615	249.923	270.092	398.255	384.479	307.57	382.206	299.007	317.785	483.467	526.197	0.292975	-0.292975	-1.80117	1.80117	-0.506778	0.506778	-0.70449	0.70449	0.0674313	1
1252	OG0004619	242.342	300.259	328.062	412.104	746.298	691.599	185.594	245.294	100.833	217.837	-0.568133	0.568133	0.190346	-0.190346	-0.693256	0.693256	-1.83715	1.83715	0.0492748	1
1253	OG0004621	1727.7	1989.9	940.584	971.979	687.176	689.072	704.414	731.309	801.161	752.822	-0.429786	0.429786	-0.0360696	0.0360696	-0.490463	0.490463	0.81445	-0.81445	0.872993	1
1254	OG0004623	53.3048	65.0419	248.969	259.855	278.907	290.114	119.093	125.78	245.658	244.794	-0.424501	0.424501	-0.390794	0.390794	-0.541867	0.541867	0.034973	-0.034973	0.00999289	1
1255	OG0004628	1262.55	1549.72	899.192	805.986	1869.31	2017.76	780.071	752.36	1330.35	1419.86	0.909326	-0.909326	-0.635322	0.635322	0.300837	-0.300837	-0.541473	0.541473	0.975381	1
1256	OG0004630	169.86	231.104	283.881	274.282	173.925	166.78	163.267	182.06	405.426	456.185	0.208916	-0.208916	0.254736	-0.254736	-0.661044	0.661044	-0.715599	0.715599	0.270572	1
1257	OG0004631	63.299	47.3146	71.5612	74.7409	93.1001	101.839	65.3564	71.3008	105.975	122.13	-0.264983	0.264983	-0.546573	0.546573	-0.530343	0.530343	-0.863485	0.863485	0.000704103	1
1258	OG0004634	135.005	136.126	584.982	660.497	434.249	415.742	581.285	656.2	647.162	701.778	-1.32158	1.32158	0.474592	-0.474592	-1.31955	1.31955	-0.882522	0.882522	0.0442967	1
1259	OG0004638	191.363	234.114	178.198	136.619	319.421	360.634	132.855	123.771	143.609	145.65	1.55375	-1.55375	-0.712961	0.712961	0.416413	-0.416413	-0.0830156	0.0830156	0.419804	1
1260	OG0004639	48.2604	83.6088	95.8909	120.627	80.0181	84.269	83.3233	95.2077	76.4243	94.6011	-0.761423	0.761423	-0.172456	0.172456	-0.443672	0.443672	-0.708362	0.708362	0.00159922	1
1261	OG0004641	298.92	390.689	227.459	296.624	154.018	138.388	188.974	222.472	131.603	170.231	-1.13361	1.13361	0.459124	-0.459124	-0.699338	0.699338	-1.09929	1.09929	0.0572251	1
1262	OG0004642	668.233	589.517	614.522	431.585	551.956	641.256	216.838	245.11	1140.79	487.45	0.819623	-0.819623	-0.350769	0.350769	-0.286842	0.286842	1.88065	-1.88065	0.216755	1
1263	OG0004645	137.241	167.755	179.613	147.394	84.9271	74.546	121.169	137.864	204.331	219.406	1.21949	-1.21949	0.805716	-0.805716	-0.79775	0.79775	-0.440351	0.440351	0.586256	1
1264	OG0004648	188.196	245.029	182.776	189.291	281.219	277.774	98.239	111.078	162.079	202.834	-0.202074	0.202074	0.0711332	-0.0711332	-0.707841	0.707841	-1.28886	1.28886	0.0457998	1
1265	OG0004652	120.468	262.903	143.443	118.888	91.1241	103.427	191.536	108.539	105.051	72.1554	0.388096	-0.388096	-0.262192	0.262192	1.1468	-1.1468	0.769691	-0.769691	0.0531182	1
1266	OG0004653	202.124	231.93	125.589	134.881	95.6399	90.6412	52.8283	55.2211	147.536	159.814	-0.807009	0.807009	0.607014	-0.607014	-0.500945	0.500945	-0.903624	0.903624	0.153033	1
1267	OG0004655	172.429	245.63	144.236	116.457	192.211	172.279	38.0765	36.2238	148.226	130.946	1.01644	-1.01644	0.521622	-0.521622	0.237856	-0.237856	0.590425	-0.590425	0.00201313	1
1268	OG0004657	264.649	307.862	38.5459	39.8021	156.296	159.268	62.3894	59.2399	115.441	119.455	-0.406353	0.406353	-0.238692	0.238692	0.656273	-0.656273	-0.43306	0.43306	0.583577	1
1269	OG0004658	2084.03	2792.05	1452.11	1347.08	1404.29	1065.76	2508.97	3525.74	558.504	932.673	0.218568	-0.218568	0.79832	-0.79832	-0.981431	0.981431	-1.46162	1.46162	0.371806	1
1270	OG0004659	24.2906	42.6366	215.323	229.785	106.692	42.9928	115.136	120.702	153.075	191.875	-0.132515	0.132515	1.7357	-1.7357	-0.0962675	0.0962675	-0.458771	0.458771	0.484857	1
1271	OG0004660	520.939	571.09	496.042	473.303	364.323	485.146	338.897	376.463	632.157	590.336	0.303877	-0.303877	-1.84246	1.84246	-0.680235	0.680235	0.443149	-0.443149	0.280162	1
1272	OG0004663	1098.02	1832.66	696.037	786.865	415.798	441.305	343.046	455.971	283.061	362.113	-0.405911	0.405911	-0.197221	0.197221	-0.936605	0.936605	-0.812009	0.812009	0.00294979	1
1273	OG0004664	64.4842	115.514	459.163	436.991	272.123	167.516	320.19	352.272	406.812	538.226	0.131535	-0.131535	1.26497	-1.26497	-0.253641	0.253641	-0.739281	0.739281	0.749609	1
1274	OG0004665	136.65	146.689	537.139	681.242	1300.62	1283.52	658.447	789.481	476.924	593.2	-1.33569	1.33569	0.0747242	-0.0747242	-1.02202	1.02202	-1.22709	1.22709	0.00865759	1
1275	OG0004666	190.151	285.656	230.803	264.378	125.87	98.5844	162.774	184.704	380.498	428.387	-0.55503	0.55503	0.995124	-0.995124	-0.516641	0.516641	-0.484641	0.484641	0.619155	1
1276	OG0004667	62.2193	48.0615	290.039	275.839	334.468	302.801	114.453	114.868	195.557	218.334	0.354007	-0.354007	0.70101	-0.70101	-0.0255564	0.0255564	-0.77634	0.77634	0.787039	1
1277	OG0004668	728.074	372.962	454.739	466.965	557.732	709.792	26.0437	119.857	870.425	781.417	-0.0384715	0.0384715	-0.347949	0.347949	-1.86493	1.86493	0.156285	-0.156285	0.157667	1
1278	OG0004671	38.1822	26.4025	124.642	151.564	117.086	123.697	82.7455	82.6211	218.65	278.728	-0.857711	0.857711	-0.241586	0.241586	0.00662096	-0.00662096	-1.06293	1.06293	0.0232795	1
1279	OG0004678	600.147	734.654	322.271	386.221	613.652	658.766	301.234	297.474	376.34	334.053	-1.25868	1.25868	-0.494409	0.494409	0.0875597	-0.0875597	0.830078	-0.830078	0.52937	1
1280	OG0004679	87.5239	113.536	78.3541	80.6523	122.518	122.686	63.1312	66.1161	69.7264	80.7072	-0.203017	0.203017	-0.00963158	0.00963158	-0.324393	0.324393	-1.02529	1.02529	0.0467601	1
1281	OG0004684	1612.89	2282.26	700.146	824.235	183.112	154.522	628.364	752.852	626.845	962.07	-0.557435	0.557435	0.579858	-0.579858	-0.61719	0.61719	-1.44474	1.44474	0.133625	1
1282	OG0004685	227.195	248.966	270.927	242.995	287.023	282.83	218.651	224.481	196.017	215.662	1.32702	-1.32702	0.179647	-0.179647	-0.321195	0.321195	-1.1651	1.1651	0.989413	1
1283	OG0004686	174.426	217.49	225.587	245.953	232.836	261.297	114.476	125.993	155.384	129.88	-0.552058	0.552058	-0.736218	0.736218	-0.612175	0.612175	1.14276	-1.14276	0.569817	1
1284	OG0004688	157.034	188.331	112.796	106.551	64.5902	78.5396	64.4515	76.3786	85.1932	84.4486	0.376644	-0.376644	-1.28931	1.28931	-1.1204	1.1204	0.0580641	-0.0580641	0.145136	1
1285	OG0004691	150.279	198.125	1399.47	1383.73	362.355	421.848	991.478	1142.62	667.78	876.317	0.0548177	-0.0548177	-0.735304	0.735304	-0.686432	0.686432	-1.309	1.309	0.0147934	1
1286	OG0004692	104.553	118.508	61.1364	73.8718	61.0054	83.673	31.4832	31.1015	39.9426	45.6984	-0.977415	0.977415	-1.62341	1.62341	0.0631856	-0.0631856	-0.696394	0.696394	0.0169827	1
1287	OG0004697	196.402	214.136	509.775	511.695	1492.73	1370.89	472.247	588.919	475.157	538.755	-0.028409	0.028409	0.643013	-0.643013	-1.6616	1.6616	-0.947944	0.947944	0.213198	1
1288	OG0004698	99.8212	124.275	732.689	752.449	759.37	830.882	317.222	429.287	768.299	1029.67	-0.117426	0.117426	-0.396874	0.396874	-1.32487	1.32487	-1.28294	1.28294	0.0115287	1
1289	OG0004699	560.29	618.093	256.868	288.011	530.872	532.718	217.166	261.189	352.097	509.896	-0.555406	0.555406	-0.0168646	0.0168646	-0.894273	0.894273	-1.77885	1.77885	0.0210059	1
1290	OG0004700	512.69	453.314	279.142	266.983	239.63	149.444	148.927	177.618	165.385	221.429	0.160386	-0.160386	1.66981	-1.66981	-0.632943	0.632943	-1.04371	1.04371	0.930678	1
1291	OG0004703	95.9512	108.922	84.8343	87.2556	160.786	192.5	87.3617	87.8026	363.408	421.438	-0.224111	0.224111	-1.4298	1.4298	-0.040091	0.040091	-1.17768	1.17768	0.0256143	1
1292	OG0004704	1293.82	1764.96	1668.06	1460.58	3285.25	3656.5	986.776	1077.55	1658.43	1866.95	0.737221	-0.737221	-0.594517	0.594517	-0.488831	0.488831	-0.657549	0.657549	0.325194	1
1293	OG0004706	50.9224	85.878	153.078	115.935	214.508	67.4487	18.8734	44.8539	307.537	395.251	0.399252	-0.399252	1.50819	-1.50819	-1.17888	1.17888	-0.360904	0.360904	0.827644	1
1294	OG0004711	74.3943	141.622	120.849	109.852	151.948	150.111	113.156	125.888	101.819	153.664	0.26725	-0.26725	0.034104	-0.034104	-0.298587	0.298587	-1.13765	1.13765	0.239627	1
1295	OG0004712	106.723	118.88	509.63	614.78	1390.69	1168.09	471.672	544.594	608.376	718.882	-1.12133	1.12133	1.04312	-1.04312	-0.860395	0.860395	-0.998336	0.998336	0.229439	1
1296	OG0004715	80.4177	49.8275	105.213	106.549	285.554	287.667	35.1095	32.2652	95.3543	62.2675	-0.0421029	0.0421029	-0.0245963	0.0245963	0.281705	-0.281705	1.40072	-1.40072	0.144402	1
1297	OG0004718	101.408	91.4937	144.075	148.786	85.8608	86.9113	89.2573	89.4962	142.454	148.581	-0.586811	0.586811	-0.221779	0.221779	-0.0487623	0.0487623	-0.767921	0.767921	0.0129773	1
1298	OG0004724	73.2947	202.8	232.697	310.783	381.548	350.724	81.262	78.7048	180.317	283.811	-0.563632	0.563632	0.165133	-0.165133	0.0627104	-0.0627104	-0.874762	0.874762	0.13725	1
1299	OG0004727	232.298	368.31	457.654	646.42	218.197	197.125	389.697	498.935	171.548	355.702	-0.772912	0.772912	0.229362	-0.229362	-0.55572	0.55572	-1.57896	1.57896	0.043674	1
1300	OG0004731	39.4575	24.893	63.5044	58.9219	116.949	112.551	46.0701	50.3559	70.8831	73.2244	0.337862	-0.337862	0.172987	-0.172987	-0.401184	0.401184	-0.146649	0.146649	0.939366	1
1301	OG0004737	62.1505	58.2889	226.694	219.528	872.08	937.292	241.482	264.151	304.993	283.809	0.443949	-0.443949	-0.996254	0.996254	-1.23927	1.23927	0.994521	-0.994521	0.623197	1
1302	OG0004739	81.4287	86.0357	131.911	146.525	142.829	161.463	83.4073	90.6387	156.764	124.759	-0.752169	0.752169	-0.877563	0.877563	-0.595419	0.595419	1.62917	-1.62917	0.73557	1
1303	OG0004740	596.277	831.71	392.249	485.988	274.583	298.53	472.165	507.989	325.086	424.116	-0.931142	0.931142	-0.364524	0.364524	-0.318855	0.318855	-1.15312	1.15312	0.00326673	1
1304	OG0004743	291.276	345.838	414.369	475.91	146.108	171.156	110.934	119.645	136.22	190.007	-0.676706	0.676706	-0.772858	0.772858	-0.369836	0.369836	-1.61404	1.61404	0.00384677	1
1305	OG0004744	36.3893	60.8859	87.5514	88.74	100.249	98.1147	42.5262	40.6213	61.4146	73.4916	-0.0532571	0.0532571	0.084988	-0.084988	0.180965	-0.180965	-0.707153	0.707153	0.416483	1
1306	OG0004750	86.4823	247.228	132.919	115.57	355.234	304.658	24.3962	29.1984	166.466	315.613	0.251591	-0.251591	0.276196	-0.276196	-0.322897	0.322897	-1.1149	1.1149	0.362578	1
1307	OG0004753	48.5353	81.3001	131.909	128.971	78.0421	90.6549	47.6368	50.3548	74.1154	94.6038	0.0819781	-0.0819781	-0.544272	0.544272	-0.201917	0.201917	-0.884002	0.884002	0.039873	1
1308	OG0004754	234.886	287.819	210.263	224.049	290.753	336.34	59.2568	57.6531	168.311	186.003	-0.485565	0.485565	-1.11209	1.11209	0.209838	-0.209838	-0.763899	0.763899	0.0349049	1
1309	OG0004756	79.9794	112.42	65.4017	58.0545	84.5288	76.3972	49.6157	47.9217	84.9669	79.1011	0.664408	-0.664408	0.564123	-0.564123	0.193887	-0.193887	0.399146	-0.399146	0.000771991	1
1310	OG0004759	516.66	895.366	860.333	1129.11	63.0772	93.0664	675.486	826.095	132.709	320.651	-0.515584	0.515584	-0.732956	0.732956	-0.382768	0.382768	-1.58204	1.58204	0.00558046	1
1311	OG0004767	266.894	374.605	237.116	239.172	239.948	201.085	121.565	122.503	262.049	271.785	-0.0480583	0.0480583	0.980793	-0.980793	-0.0427945	0.0427945	-0.203011	0.203011	0.406682	1
1312	OG0004769	62.6393	85.4074	320.374	295.838	244.808	238.574	156.181	169.578	290.68	341.001	0.461886	-0.461886	0.149605	-0.149605	-0.477075	0.477075	-0.924101	0.924101	0.404048	1
1313	OG0004770	280.802	515.147	610.942	666.012	102.486	50.0159	311.372	378.72	108.93	249.636	-0.150311	0.150311	1.19919	-1.19919	-0.34015	0.34015	-1.36771	1.36771	0.674165	1
1314	OG0004773	175.877	226.016	185.461	161.651	364.683	351.015	113.241	114.252	163	170.498	1.00036	-1.00036	0.278491	-0.278491	-0.0648126	0.0648126	-0.327854	0.327854	0.318021	1
1315	OG0004776	137.631	181.314	224.167	192.588	73.3322	76.3533	90.3583	104.535	149.406	267.627	0.483415	-0.483415	-0.12876	0.12876	-0.464069	0.464069	-1.80855	1.80855	0.211154	1
1316	OG0004777	155.197	161.28	190.359	241.773	151.095	128.286	119.199	159.51	176.389	207.645	-1.14331	1.14331	0.784509	-0.784509	-1.38983	1.38983	-0.78208	0.78208	0.116788	1
1317	OG0004778	248.028	202.872	133.489	107.59	78.3602	88.724	36.5098	32.0526	77.8072	67.6123	1.22588	-1.22588	-0.707804	0.707804	0.741833	-0.741833	0.799999	-0.799999	0.134856	1
1318	OG0004781	1141.33	1570.92	1432.72	1645.91	5352.1	5117.02	1560.31	1894.97	889.81	1574.05	-0.429653	0.429653	0.139323	-0.139323	-0.600938	0.600938	-1.72309	1.72309	0.0555308	1
1319	OG0004782	340.289	583.461	109.635	124.974	438.398	408.598	127.746	132.552	286.527	354.901	-0.471536	0.471536	0.253743	-0.253743	-0.133158	0.133158	-0.768786	0.768786	0.122364	1
1320	OG0004783	333.986	340.855	656.546	528.918	261.596	288.205	323.239	382.21	594.519	688.953	1.40458	-1.40458	-0.631412	0.631412	-1.0906	1.0906	-0.959918	0.959918	0.467757	1
1321	OG0004784	425.933	699.401	265.082	367.273	72.3804	107.319	243.54	307.947	256.321	304.774	-0.903177	0.903177	-1.08662	1.08662	-0.652709	0.652709	-0.482625	0.482625	0.000168322	0.326039
1322	OG0004787	78.3117	118.476	159.872	177.464	95.0813	78.1056	101.371	134.245	53.1029	111.975	-0.246973	0.246973	0.464209	-0.464209	-0.660778	0.660778	-1.68896	1.68896	0.144782	1
1323	OG0004788	83.6371	105.701	58.9247	88.9938	68.4129	113.996	32.0601	39.4587	61.4169	72.6899	-1.17313	1.17313	-1.44213	1.44213	-0.597011	0.597011	-0.485108	0.485108	0.00125469	1
1324	OG0004790	239.182	360.38	156.239	195.717	186.172	176.415	108.365	122.07	95.5852	170.233	-0.643869	0.643869	0.154459	-0.154459	-0.341415	0.341415	-1.61201	1.61201	0.0593729	1
1325	OG0004791	57.7643	74.6945	205.687	195.02	195.814	293.218	88.1034	102.614	192.556	204.44	0.224272	-0.224272	-1.67801	1.67801	-0.640982	0.640982	-0.252209	0.252209	0.0860842	1
1326	OG0004796	320.452	287.714	171.247	171.035	140.597	133.351	200.685	270.71	202.943	262.699	0.00639448	-0.00639448	0.27334	-0.27334	-1.5352	1.5352	-1.32624	1.32624	0.0936941	1
1327	OG0004797	493.124	472.624	317.214	333.03	554.33	479.222	505.872	670.902	465.922	824.258	-0.160664	0.160664	0.480032	-0.480032	-0.926368	0.926368	-1.83465	1.83465	0.134464	1
1328	OG0004799	5727.52	3790.29	113.052	138.283	247.726	250.665	97.4989	119.223	163.464	198.558	-0.799293	0.799293	-0.0469545	0.0469545	-0.798094	0.798094	-0.771827	0.771827	0.0037015	1
1329	OG0004800	89.8331	90.746	146.127	128.624	180.968	241.977	277.25	257.487	423.666	434.803	0.831326	-0.831326	-1.88236	1.88236	0.482284	-0.482284	-0.169293	0.169293	0.680199	1
1330	OG0004801	445.799	451.949	254.653	261.593	398.376	346.491	171.921	168.731	391.578	382.958	-0.392054	0.392054	2.03137	-2.03137	0.273104	-0.273104	0.324559	-0.324559	0.177038	1
1331	OG0004803	226.205	276.522	449.912	372.489	350.02	469.057	418.676	333.335	833.02	846.087	0.867956	-0.867956	-1.33989	1.33989	1.04627	-1.04627	-0.0717462	0.0717462	0.756153	1
1332	OG0004805	23.3299	41.6275	65.0858	75.0885	94.37	68.6819	98.8176	112.769	100.895	101.819	-0.449069	0.449069	0.991446	-0.991446	-0.414961	0.414961	-0.0286814	0.0286814	0.920654	1
1333	OG0004808	321.347	342.047	711.868	663.605	613.706	545.223	517.578	603.729	204.097	274.458	0.408403	-0.408403	0.687791	-0.687791	-0.894268	0.894268	-1.7113	1.7113	0.379501	1
1334	OG0004809	536.213	449.194	326.693	299.657	1136.24	1034.54	312.525	347.089	995.697	1267.35	0.537587	-0.537587	0.583448	-0.583448	-0.652621	0.652621	-1.495	1.495	0.497068	1
1335	OG0004810	159.994	205.571	131.281	142.008	45.9707	212.728	86.7839	113.194	146.148	206.846	-0.120234	0.120234	-1.9745	1.9745	-0.404528	0.404528	-0.526705	0.526705	0.0418278	1
1336	OG0004811	140.102	182.97	1529.52	384.655	207.802	263.077	135.988	130.649	361.326	252.01	1.95477	-1.95477	-0.383656	0.383656	0.0654419	-0.0654419	0.582519	-0.582519	0.172496	1
1337	OG0004815	335.563	354.678	145.971	143.916	196.745	213.201	73.5973	86.111	198.099	211.121	0.153601	-0.153601	-0.869972	0.869972	-1.69814	1.69814	-0.689676	0.689676	0.0276996	1
1338	OG0004816	43.3779	64.6551	181.198	176.597	287.866	259.512	126.18	133.611	181.471	180.923	0.132372	-0.132372	0.53329	-0.53329	-0.294463	0.294463	0.0155643	-0.0155643	0.45475	1
1339	OG0004818	96.2688	125.075	166.978	227.004	543.757	476.222	298.514	350.261	395.963	429.464	-1.40997	1.40997	0.612753	-0.612753	-0.738147	0.738147	-0.375604	0.375604	0.160447	1
1340	OG0004819	215.533	204.082	907.408	812.59	32.1205	88.6059	424.858	484.084	594.985	561.743	0.245034	-0.245034	-2.07967	2.07967	-0.289625	0.289625	0.127737	-0.127737	0.238386	1
1341	OG0004820	208.482	194.462	769.022	776.959	1071.21	1213.12	358.349	396.704	488.78	485.045	-0.124189	0.124189	-1.50262	1.50262	-1.22874	1.22874	0.0927641	-0.0927641	0.0487504	1
1342	OG0004823	304.48	337.124	43.9187	44.3248	77.3541	84.2827	30.4118	33.4288	57.261	66.546	-0.0880118	0.0880118	-0.819735	0.819735	-0.903768	0.903768	-1.43417	1.43417	0.00604496	1
1343	OG0004826	144.019	161.974	97.4707	90.7337	134.02	117.613	78.956	72.4655	121.215	123.463	0.727426	-0.727426	1.32496	-1.32496	0.871046	-0.871046	-0.186697	0.186697	0.0224433	1
1344	OG0004827	271.753	309.795	146.443	124.802	267.167	260.379	144.805	161.113	348.406	323.099	1.3786	-1.3786	0.22233	-0.22233	-0.921108	0.921108	0.651186	-0.651186	0.365947	1
1345	OG0004829	145.979	135.166	93.0458	95.7726	93.8889	81.9948	60.7411	54.3748	85.4263	94.0319	-0.284207	0.284207	1.33087	-1.33087	1.08838	-1.08838	-0.94372	0.94372	0.469439	1
1346	OG0004830	931.765	1121.98	982.448	1230.27	800.706	803.18	848.972	915.59	183.554	397.122	-0.598045	0.598045	-0.00823706	0.00823706	-0.201594	0.201594	-1.96393	1.96393	0.0680333	1
1347	OG0004831	631.176	786.613	485.935	561.247	830.457	893.739	444.967	452.346	611.835	572.163	-1.08616	1.08616	-0.554296	0.554296	-0.124204	0.124204	0.506038	-0.506038	0.234762	1
1348	OG0004836	166.338	160.808	95.259	88.4723	162.892	167.025	62.0598	57.3379	98.358	104.759	1.18612	-1.18612	-0.402275	0.402275	1.2699	-1.2699	-1.01193	1.01193	0.543812	1
1349	OG0004837	180.243	231.165	73.7744	88.6479	77.4601	70.492	47.3888	53.3169	59.7984	78.5719	-0.888533	0.888533	0.456987	-0.456987	-0.571178	0.571178	-1.31646	1.31646	0.0730398	1
1350	OG0004840	45.0914	69.8215	144.231	118.021	55.3257	77.6661	60.9051	54.3748	108.976	98.8797	0.706353	-0.706353	-1.18723	1.18723	0.400359	-0.400359	0.343307	-0.343307	0.834268	1
1351	OG0004841	42.2141	21.1817	145.497	116.98	134.537	97.1809	79.8618	77.3307	124.215	138.966	0.592589	-0.592589	0.879312	-0.879312	0.0878252	-0.0878252	-0.305721	0.305721	0.143291	1
1352	OG0004842	524.995	665.853	1192.71	1111.9	518.783	582.544	526.601	621.283	458.07	652.873	0.313988	-0.313988	-0.518411	0.518411	-0.738585	0.738585	-1.57014	1.57014	0.0615473	1
1353	OG0004843	193.79	278.874	109.003	100.466	198.333	199.097	191.784	214.114	275.11	296.631	0.440566	-0.440566	-0.020777	0.020777	-0.594688	0.594688	-0.406892	0.406892	0.403608	1
1354	OG0004847	39.0848	33.6293	144.86	115.939	352.881	362.15	99.6442	83.0442	321.623	240.024	1.07984	-1.07984	-0.126229	0.126229	0.884792	-0.884792	1.41472	-1.41472	0.0133512	1
1355	OG0004849	117.148	184.174	151.814	237.78	107.209	121.173	79.6969	99.2287	106.898	201.768	-1.02562	1.02562	-0.284191	0.284191	-0.507389	0.507389	-1.4286	1.4286	0.00431847	1
1356	OG0004850	38.6343	37.7845	95.7345	70.5675	108.445	167.618	44.1036	36.7675	72.2684	77.233	1.14725	-1.14725	-1.62493	1.62493	0.687696	-0.687696	-0.251749	0.251749	0.98154	1
1357	OG0004852	33.6632	45.6641	63.1917	63.7905	99.8584	132.807	37.5828	35.6493	82.4249	75.8968	-0.0469682	0.0469682	-1.4105	1.4105	0.26297	-0.26297	0.410684	-0.410684	0.530007	1
1358	OG0004853	540.109	539.427	125.59	109.156	86.0134	70.3849	40.1369	63.1551	112.209	184.256	0.422402	-0.422402	0.602937	-0.602937	-1.34459	1.34459	-1.46632	1.46632	0.29911	1
1359	OG0004856	70.2036	91.9103	72.3511	74.9164	66.8352	79.9623	60.1642	63.1551	52.1816	80.9744	-0.136234	0.136234	-0.699352	0.699352	-0.189682	0.189682	-1.69109	1.69109	0.0372915	1
1360	OG0004857	150.432	181.918	94.4328	113.601	59.407	109.933	76.5643	82.8295	84.736	97.2735	-0.582015	0.582015	-1.88472	1.88472	-0.248288	0.248288	-0.435119	0.435119	0.0242091	1
1361	OG0004860	828.874	1084.63	923.683	1069.84	453.466	405.132	597.778	676.439	333.858	655.276	-0.422022	0.422022	0.324043	-0.324043	-0.355349	0.355349	-1.87048	1.87048	0.125469	1
1362	OG0004861	361.874	359.756	154.342	168.429	102.186	160.037	104.841	121.523	161.158	173.438	-0.386571	0.386571	-1.95401	1.95401	-0.65275	0.65275	-0.325051	0.325051	0.0217915	1
1363	OG0004870	58.5875	75.2376	68.0873	82.9102	79.8939	69.9674	32.9667	30.361	94.433	84.7158	-1.12706	1.12706	0.760488	-0.760488	0.472396	-0.472396	0.622746	-0.622746	0.579886	1
1364	OG0004872	318.18	286.692	323.219	227.353	225.891	288.966	191.554	177.817	186.144	215.977	1.57607	-1.57607	-1.10891	1.10891	0.33662	-0.33662	-0.671537	0.671537	0.9401	1
1365	OG0004874	46.0719	53.532	532.689	569.247	561.534	612.219	207.936	260.979	828.631	902.675	-0.462054	0.462054	-0.601408	0.601408	-1.57541	1.57541	-0.59564	0.59564	0.00438006	1
1366	OG0004875	260.03	101.925	1440.41	1476.74	1248.27	1354.04	969.798	1107.7	1268.47	1526.75	-0.0582609	0.0582609	-0.190176	0.190176	-0.310582	0.310582	-0.432341	0.432341	0.00472586	1
1367	OG0004880	54.7206	66.4821	502.36	604.707	588.807	575.123	262.58	326.988	307.997	429.728	-0.819533	0.819533	0.104222	-0.104222	-0.968437	0.968437	-1.46275	1.46275	0.0145015	1
1368	OG0004882	123.953	132.924	99.6823	106.028	267.661	279.966	71.1256	106.74	96.5087	120.794	-0.278364	0.278364	-0.202757	0.202757	-1.80693	1.80693	-1.00851	1.00851	0.0208118	1
1369	OG0004886	45.3862	56.5702	494.939	532.398	168.985	235.668	304.859	326.038	361.335	331.648	-0.370938	0.370938	-1.67646	1.67646	-0.34151	0.34151	0.43582	-0.43582	0.165891	1
1370	OG0004887	718.714	868.444	608.204	600.188	715.143	802.315	222.36	249.764	292.98	390.976	0.0740229	-0.0740229	-0.64101	0.64101	-0.647683	0.647683	-1.59875	1.59875	0.0273809	1
1371	OG0004891	106.788	106.236	149.603	143.92	169.008	163.814	82.3343	84.5232	98.3557	123.733	0.348934	-0.348934	0.281288	-0.281288	-0.236426	0.236426	-2.05938	2.05938	0.335916	1
1372	OG0004898	241.071	278.839	173.141	182.856	318.836	331.731	98.6536	95.9493	184.244	191.88	-0.690962	0.690962	-0.501852	0.501852	0.351846	-0.351846	-0.514029	0.514029	0.0867967	1
1373	OG0004900	262.54	380.383	167.139	242.647	150.441	132.708	289.942	356.185	153.613	207.915	-1.20891	1.20891	0.410874	-0.410874	-0.672646	0.672646	-0.985448	0.985448	0.0518949	1
1374	OG0004901	89.1901	106.165	98.1042	92.1225	32.0533	106.434	143.739	138.003	272.418	267.777	0.122298	-0.122298	-2.08889	2.08889	0.0791788	-0.0791788	0.0334127	-0.0334127	0.27208	1
1375	OG0004902	96.8568	128.367	210.584	230.131	39.1064	83.5659	151.317	180.262	60.0293	55.0519	-0.233479	0.233479	-1.90789	1.90789	-0.459537	0.459537	0.227684	-0.227684	0.118563	1
1376	OG0004903	151.269	124.978	240.911	234.368	1340.06	1253.91	91.1528	95.6319	462.226	439.614	0.271668	-0.271668	0.655394	-0.655394	-0.473258	0.473258	0.49484	-0.49484	0.227509	1
1377	OG0004909	269.626	333.66	131.301	123.689	279.091	238.168	291.921	296.947	97.5754	141.556	0.276862	-0.276862	0.733763	-0.733763	-0.0791569	0.0791569	-1.70575	1.70575	0.624491	1
1378	OG0004911	36.0227	35.608	93.9921	142.878	119.049	149.479	34.8623	37.6603	52.872	62.0002	-1.7405	1.7405	-0.955666	0.955666	-0.325377	0.325377	-0.670147	0.670147	0.00492989	1
1379	OG0004913	21.6439	38.4046	324.164	333.725	283.997	247.635	118.021	110.971	147.072	172.104	-0.102826	0.102826	0.483919	-0.483919	0.217811	-0.217811	-0.554888	0.554888	0.94676	1
1380	OG0004914	481.688	527.083	170.771	196.066	232.58	233.152	143.736	204.276	67.4175	129.613	-0.395645	0.395645	-0.00705541	0.00705541	-0.998134	0.998134	-1.81121	1.81121	0.0277246	1
1381	OG0004915	483.36	546.987	536.959	760.374	369.571	356.717	449.418	589.659	291.465	391.809	-1.34687	1.34687	0.138417	-0.138417	-1.05559	1.05559	-1.14858	1.14858	0.0115	1
1382	OG0004920	305.482	351.166	307.548	325.91	501.834	530.353	359.791	380.035	225.11	306.524	-0.351272	0.351272	-0.334811	0.334811	-0.331594	0.331594	-1.85575	1.85575	0.0365651	1
1383	OG0004923	154.401	177.802	157.501	149.483	132.165	169.043	53.9005	68.3387	67.6461	110.906	0.181401	-0.181401	-0.850364	0.850364	-0.820359	0.820359	-1.68274	1.68274	0.0259191	1
1384	OG0004926	75.6742	98.7432	87.5198	132.969	159.718	157.994	78.3585	89.4613	45.4861	82.8451	-1.13228	1.13228	0.0298119	-0.0298119	-0.363416	0.363416	-1.5991	1.5991	0.0257462	1
1385	OG0004928	77.9726	108.071	133.805	127.226	142.068	155.244	83.24	76.5891	134.142	146.719	0.296515	-0.296515	-0.5214	0.5214	0.489585	-0.489585	-0.52682	0.52682	0.741004	1
1386	OG0004931	150.327	184.909	550.15	611.403	722.41	597.376	278.898	315.353	285.564	392.146	-0.495859	0.495859	0.890837	-0.890837	-0.576838	0.576838	-1.47881	1.47881	0.275134	1
1387	OG0004934	352.982	373.299	282.142	285.234	504.775	545.256	168.954	151.911	259.514	236.245	-0.135076	0.135076	-0.955685	0.955685	1.31673	-1.31673	1.16351	-1.16351	0.40038	1
1388	OG0004935	89.2787	125.873	374.087	257.425	500.888	580.627	168.376	149.902	401.273	343.671	1.4046	-1.4046	-0.560591	0.560591	0.441319	-0.441319	0.587922	-0.587922	0.151527	1
1389	OG0004939	327.861	324.825	483.636	413.731	163.536	178.684	245.684	255.371	280.753	395.251	0.857815	-0.857815	-0.487433	0.487433	-0.212888	0.212888	-1.86511	1.86511	0.322722	1
1390	OG0004940	25.0526	38.8891	186.883	270.11	436.683	441.151	352.166	468.639	128.832	304.659	-0.750944	0.750944	-0.0209877	0.0209877	-0.585112	0.585112	-1.67247	1.67247	0.0204441	1
1391	OG0004941	320.463	313.06	261.627	263.738	899.641	924.336	174.559	180.791	461.699	499.265	-0.182859	0.182859	-0.616305	0.616305	-0.798356	0.798356	-1.77944	1.77944	0.0122395	1
1392	OG0004944	333.217	350.031	110.583	117.152	256.791	287.266	57.6917	64.1072	116.595	104.225	-0.597507	0.597507	-1.16026	1.16026	-1.09104	1.09104	1.16042	-1.16042	0.313096	1
1393	OG0004946	246.188	320.407	256.869	280.191	183.081	160.543	148.763	177.088	99.2723	116.937	-0.475204	0.475204	0.717755	-0.717755	-0.951245	0.951245	-0.894072	0.894072	0.194083	1
1394	OG0004949	111.356	161.086	311.053	270.631	126.532	113.935	133.103	151.169	566.767	510.85	0.6755	-0.6755	0.509212	-0.509212	-0.61778	0.61778	0.504404	-0.504404	0.25058	1
1395	OG0004952	843.514	704.834	283.646	283.843	205.042	243.221	563.154	669.956	285.052	339.932	-0.0042208	0.0042208	-1.03473	1.03473	-1.05224	1.05224	-1.06681	1.06681	0.00529727	1
1396	OG0004955	1435.57	1899.53	663.18	832.06	1014.69	986.973	310.052	388.24	250.74	323.096	-0.972179	0.972179	0.119186	-0.119186	-0.963793	0.963793	-1.08533	1.08533	0.0110111	1
1397	OG0004956	1216.44	599.469	347.545	409.858	322.33	318.998	198.459	244.686	140.145	220.742	-0.407983	0.407983	0.0257679	-0.0257679	-0.517312	0.517312	-1.10749	1.10749	0.022832	1
1398	OG0004960	83.2981	108.003	407.89	458.699	190.737	74.2878	164.339	186.292	135.297	164.624	-0.26124	0.26124	1.9578	-1.9578	-0.278973	0.278973	-0.435695	0.435695	0.566232	1
1399	OG0004963	173.34	193.359	163.725	167.324	248.747	242.422	126.592	119.751	167.62	169.432	-0.3617	0.3617	0.428511	-0.428511	0.924013	-0.924013	-0.178823	0.178823	0.366141	1
1400	OG0004964	31.4853	41.8523	85.4646	79.088	137.128	133.041	62.3894	51.308	75.0367	73.2271	0.464186	-0.464186	0.181239	-0.181239	1.16749	-1.16749	0.146201	-0.146201	0.0264793	1
1401	OG0004966	42.9976	62.3205	110.584	95.7726	97.6599	137.987	39.8073	45.9118	139.914	156.334	0.551424	-0.551424	-1.31474	1.31474	-0.547112	0.547112	-0.425802	0.425802	0.160048	1
1402	OG0004967	400.502	477.276	499.518	664.325	166.238	368.725	480.572	553.692	306.15	456.372	-0.648174	0.648174	-1.73254	1.73254	-0.323602	0.323602	-0.901766	0.901766	0.00548398	1
1403	OG0004968	359.204	409.2	270.769	230.48	495.016	508.635	146.372	170.001	352.222	365.82	1.31492	-1.31492	-0.221982	0.221982	-1.22179	1.22179	-0.309802	0.309802	0.778008	1
1404	OG0004970	198.589	185.499	404.418	310.611	172.324	190.657	169.037	180.79	512.096	493.327	1.85945	-1.85945	-0.715825	0.715825	-0.476149	0.476149	0.264593	-0.264593	0.591104	1
1405	OG0004971	26.7433	45.0351	537.114	746.02	368.112	354.745	527.96	597.595	226.269	385.099	-0.855151	0.855151	0.0971291	-0.0971291	-0.324953	0.324953	-1.36456	1.36456	0.0344468	1
1406	OG0004976	92.2461	106.624	126.063	133.145	178.676	203.829	73.1036	76.8007	436.365	188.943	-0.14163	0.14163	-0.340872	0.340872	-0.127845	0.127845	2.05108	-2.05108	0.402604	1
1407	OG0004978	485.202	676.328	478.188	542.476	367.815	349.461	457.722	519.496	504.244	598.623	-0.644222	0.644222	0.261719	-0.261719	-0.646542	0.646542	-0.87526	0.87526	0.036853	1
1408	OG0004981	157.445	200.904	104.896	142.877	100.639	122.499	47.472	51.8359	55.8734	70.2847	-1.29778	1.29778	-0.829383	0.829383	-0.372026	0.372026	-0.967103	0.967103	0.000693982	1
1409	OG0004983	166.155	190	166.504	181.294	284.09	265.002	66.5094	72.9923	183.092	220.74	-0.6659	0.6659	0.544392	-0.544392	-0.727743	0.727743	-1.45992	1.45992	0.0967794	1
1410	OG0004986	68.0533	86.3149	208.053	190.502	101.752	46.1514	52.417	63.5783	178.705	253.078	0.210908	-0.210908	1.80044	-1.80044	-0.460843	0.460843	-0.824957	0.824957	0.674183	1
1411	OG0004987	569.963	652.721	526.372	409.51	95.8288	100.474	391.067	409.407	863.958	580.45	1.08334	-1.08334	-0.205306	0.205306	-0.198777	0.198777	1.7029	-1.7029	0.128241	1
1412	OG0004988	136.84	152.052	178.986	162.516	445.412	479.068	110.109	122.608	223.953	204.972	0.963836	-0.963836	-0.727573	0.727573	-1.07332	1.07332	0.8844	-0.8844	0.975906	1
1413	OG0004989	260.892	254.17	183.566	186.159	300.416	207.414	107.142	130.859	471.23	504.284	-0.0702615	0.0702615	1.83469	-1.83469	-0.998336	0.998336	-0.339446	0.339446	0.812364	1
1414	OG0004990	113.478	169.371	346.125	339.635	767.711	705.584	285.125	304.133	441.234	484.58	0.0955553	-0.0955553	0.425728	-0.425728	-0.32567	0.32567	-0.47268	0.47268	0.648512	1
1415	OG0004992	42.8968	39.4947	210.268	165.125	437.64	475.915	292.579	307.523	211.719	229.828	1.79381	-1.79381	-0.624964	0.624964	-0.371462	0.371462	-0.611794	0.611794	0.914406	1
1416	OG0004993	143.877	167.803	166.346	177.291	261.656	262.036	118.069	126.645	113.594	167.561	-0.318556	0.318556	-0.00725404	0.00725404	-0.3505	0.3505	-1.91992	1.91992	0.0770482	1
1417	OG0004997	118.51	105.095	936.322	910.272	170.865	628.333	175.712	399.558	420.667	327.099	0.0423836	-0.0423836	-1.71978	1.71978	-1.16908	1.16908	0.375947	-0.375947	0.128154	1
1418	OG0004998	335.648	390.959	206.475	212.229	200.49	234.243	190.13	208.83	132.988	151.529	-0.214597	0.214597	-1.21237	1.21237	-0.731899	0.731899	-1.0176	1.0176	0.00205931	1
1419	OG0005000	52.4786	35.7397	287.358	232.39	85.4857	143.692	215.889	218.13	149.614	146.983	0.670976	-0.670976	-1.61134	1.61134	-0.0327549	0.0327549	0.0562691	-0.0562691	0.530027	1
1420	OG0005002	138.387	116.772	384.828	369.705	274.521	360.271	201.918	262.141	259.745	329.507	0.178578	-0.178578	-1.2036	1.2036	-1.1563	1.1563	-1.05486	1.05486	0.0134644	1
1421	OG0005003	355.803	717.216	820.683	1088.96	765.857	862.386	801.502	1089.51	230.425	378.418	-0.636849	0.636849	-0.268749	0.268749	-0.690416	0.690416	-1.1019	1.1019	0.00138928	1
1422	OG0005004	36.4763	67.6986	84.0428	95.0773	80	67.2702	70.4671	70.9824	111.05	112.776	-0.410865	0.410865	0.576496	-0.576496	-0.0242956	0.0242956	-0.0514495	0.0514495	0.881664	1
1423	OG0005005	299.3	361.467	165.874	152.437	297.953	263.126	127.672	139.699	123.524	149.92	0.557212	-0.557212	0.819321	-0.819321	-0.593751	0.593751	-1.27417	1.27417	0.73576	1
1424	OG0005011	55.0367	62.2942	512.658	466.239	583.924	526.142	352.08	401.746	363.177	396.86	0.81891	-0.81891	0.898912	-0.898912	-1.1378	1.1378	-0.76533	0.76533	0.905374	1
1425	OG0005012	122.218	214.687	148.813	159.737	131.327	122.29	127.498	122.182	70.8808	102.351	-0.225114	0.225114	0.226551	-0.226551	0.135358	-0.135358	-1.15508	1.15508	0.297467	1
1426	OG0005014	232.204	219.077	228.116	288.015	526.899	492.743	241.564	271.663	398.271	433.203	-1.71355	1.71355	0.494602	-0.494602	-0.865938	0.865938	-0.620303	0.620303	0.0803306	1
1427	OG0005015	250.684	355.472	320.69	409.512	542.058	605.22	399.313	490.324	287.22	482.372	-0.737313	0.737313	-0.333703	0.333703	-0.620088	0.620088	-1.53704	1.53704	0.00442651	1
1428	OG0005017	165.82	202.409	60.822	83.4317	230.873	207.809	57.7741	79.5522	24.7044	63.6037	-0.656633	0.656633	0.220257	-0.220257	-0.66439	0.66439	-1.84543	1.84543	0.0493167	1
1429	OG0005021	139.7	189.775	127.8	126.017	217.211	214.066	86.4543	88.2268	154.689	149.923	0.0971492	-0.0971492	0.100811	-0.100811	-0.140269	0.140269	0.21627	-0.21627	0.243392	1
1430	OG0005022	260.084	401.397	181.673	225.439	309.453	232.96	157.253	172.646	247.506	297.978	-0.769539	0.769539	1.00947	-1.00947	-0.334014	0.334014	-0.662335	0.662335	0.538516	1
1431	OG0005023	143.462	162.596	204.895	220.397	427.157	478.964	107.471	97.9603	135.064	137.632	-0.746159	0.746159	-1.17042	1.17042	0.9477	-0.9477	-0.192841	0.192841	0.405022	1
1432	OG0005027	129.923	256.747	115.954	177.812	90.2266	71.0825	51.2632	60.1931	159.078	176.383	-1.06753	1.06753	0.601673	-0.601673	-0.406188	0.406188	-0.261525	0.261525	0.287253	1
1433	OG0005030	160.449	246.912	261.923	268.024	174.942	148.581	296.451	331.536	1330.11	338.596	-0.0382359	0.0382359	0.2706	-0.2706	-0.185544	0.185544	1.97332	-1.97332	0.20196	1
1434	OG0005031	175.479	204.973	401.86	487.668	383.359	354.253	131.948	170.32	159.078	204.438	-0.928629	0.928629	0.379859	-0.379859	-1.22206	1.22206	-1.20123	1.20123	0.0326951	1
1435	OG0005032	1153.39	1546.86	596.99	946.256	365.72	257.734	1594.43	2115.43	601.445	1156.35	-1.01933	1.01933	0.780106	-0.780106	-0.632517	0.632517	-1.42183	1.42183	0.141471	1
1436	OG0005033	170.83	255.064	124.797	150.179	325.809	286.516	78.0494	73.4186	201.791	131.753	-0.629405	0.629405	0.43756	-0.43756	0.208468	-0.208468	1.43181	-1.43181	0.272509	1
1437	OG0005035	388.661	395.166	112.162	90.3843	137.022	137.952	69.9709	61.781	445.586	399.773	1.67956	-1.67956	-0.052792	0.052792	0.971014	-0.971014	0.846539	-0.846539	0.0140649	1
1438	OG0005036	148.949	158.099	220.467	210.931	63.2996	97.494	154.943	197.399	192.018	208.519	0.187093	-0.187093	-1.79991	1.79991	-1.01988	1.01988	-0.348681	0.348681	0.049531	1
1439	OG0005038	180.491	202.287	605.361	486.85	1455.26	1425.69	361.643	363.062	659.63	562.545	1.57215	-1.57215	0.148699	-0.148699	-0.0283688	0.0283688	1.15096	-1.15096	0.0408186	1
1440	OG0005040	208.344	232.997	147.234	192.235	166.683	169.851	122.306	132.869	240.581	254.679	-1.84204	1.84204	-0.130796	0.130796	-0.5752	0.5752	-0.39555	0.39555	0.0337419	1
1441	OG0005042	1003.33	1509.83	1383.07	1581.2	88.3411	333.843	597.769	720.519	126.759	175.843	-0.219247	0.219247	-1.90748	1.90748	-0.305434	0.305434	-0.532078	0.532078	0.03765	1
1442	OG0005043	33.3715	43.4371	182.145	203.884	181.563	218.175	108.707	116.789	111.978	153.932	-0.509792	0.509792	-0.829133	0.829133	-0.32448	0.32448	-1.42828	1.42828	0.0040341	1
1443	OG0005045	164.635	203.729	180.567	218.315	236.449	99.521	117.857	140.064	129.989	158.475	-0.445019	0.445019	1.91658	-1.91658	-0.404894	0.404894	-0.46438	0.46438	0.730006	1
1444	OG0005048	51.4874	60.2274	386.41	585.935	293.872	245.696	381.358	516.847	158.383	358.65	-0.909659	0.909659	0.395811	-0.395811	-0.668697	0.668697	-1.71709	1.71709	0.0568182	1
1445	OG0005049	127.218	120.606	199.047	257.945	90.2602	90.7098	162.213	212.506	114.52	208.719	-0.788347	0.788347	-0.0151967	0.0151967	-0.82097	0.82097	-1.7826	1.7826	0.0158273	1
1446	OG0005050	160.364	171.351	179.616	152.955	199.282	76.0346	194.999	204.598	189.326	223.952	0.366326	-0.366326	2.04555	-2.04555	-0.109773	0.109773	-0.382849	0.382849	0.259046	1
1447	OG0005051	1272.52	1001.83	258.19	301.346	163.88	139.215	186.994	265.632	146.148	199.63	-0.575436	0.575436	0.607116	-0.607116	-1.29621	1.29621	-1.15395	1.15395	0.0956814	1
1448	OG0005059	48.3444	66.9119	93.9937	103.073	143.465	171.018	53.8189	45.5944	64.8778	76.1641	-0.441519	0.441519	-0.839629	0.839629	0.792828	-0.792828	-0.766857	0.766857	0.285905	1
1449	OG0005060	758.085	356.22	200.867	212.495	378.887	424.353	151.811	140.592	496.807	351.079	-0.146877	0.146877	-0.295535	0.295535	0.200331	-0.200331	0.897384	-0.897384	0.416699	1
1450	OG0005061	229.377	286.881	439.888	377.28	1016.2	1012.68	310.957	356.188	368.259	422.238	0.979391	-0.979391	0.0221698	-0.0221698	-0.866649	0.866649	-0.872879	0.872879	0.575914	1
1451	OG0005064	296.49	375.783	204.734	236.564	253.144	293.946	156.18	161.009	167.159	188.406	-0.906653	0.906653	-0.937493	0.937493	-0.191375	0.191375	-0.751158	0.751158	0.0012772	1
1452	OG0005068	348.396	275.784	296.993	259.855	383.775	352.347	195.822	183.753	427.132	329.51	0.730977	-0.730977	0.467934	-0.467934	0.348494	-0.348494	1.41408	-1.41408	0.00460413	1
1453	OG0005069	105.273	99.9185	210.423	217.791	329.601	366.49	88.185	119.646	199.023	221.277	-0.212511	0.212511	-0.654482	0.654482	-1.8695	1.8695	-0.653909	0.653909	0.0151294	1
1454	OG0005071	594.087	664.763	336.171	284.883	789.02	833.066	229.612	225.962	384.647	402.737	1.64791	-1.64791	-0.541836	0.541836	0.15987	-0.15987	-0.458445	0.458445	0.593611	1
1455	OG0005072	41.3314	39.4314	165.874	178.335	257.218	279.485	162.058	212.723	93.5072	114.377	-0.429717	0.429717	-0.492469	0.492469	-1.60464	1.60464	-1.19163	1.19163	0.00355799	1
1456	OG0005074	231.606	277.225	335.538	338.943	261.571	427.042	223.268	220.99	474.686	471.413	-0.041736	0.041736	-1.98653	1.98653	0.0423963	-0.0423963	0.0286052	-0.0286052	0.215169	1
1457	OG0005077	51.0354	59.4936	69.5091	69.874	89.2981	90.4626	55.6057	56.7529	71.3425	74.0261	-0.0696981	0.0696981	-0.172458	0.172458	-0.271796	0.271796	-0.491435	0.491435	0.00755578	1
1458	OG0005078	288.099	393.355	1195.65	1201.03	917.627	859.823	651.341	774.046	715.739	874.682	-0.0231438	0.0231438	0.33535	-0.33535	-0.887718	0.887718	-1.03056	1.03056	0.137505	1
1459	OG0005079	32.8232	34.7157	221.638	240.386	359.952	475.258	334.528	351.638	447.766	358.372	-0.464042	0.464042	-1.57878	1.57878	-0.285144	0.285144	1.26812	-1.26812	0.545961	1
1460	OG0005083	59.6596	59.4418	313.265	309.914	87.2471	124.743	206.291	221.095	204.795	194.288	0.0625927	-0.0625927	-2.05891	2.05891	-0.403213	0.403213	0.306461	-0.306461	0.214089	1
1461	OG0005086	349.19	403.372	223.276	228.085	422.326	403.02	240.574	232.628	200.112	223.179	-0.23698	0.23698	0.520287	-0.520287	0.37352	-0.37352	-1.21209	1.21209	0.635643	1
1462	OG0005089	6.33647	38.9264	93.3633	57.7069	128.901	100.771	28.5978	25.4948	144.862	102.888	0.635296	-0.635296	0.329674	-0.329674	0.154404	-0.154404	0.456019	-0.456019	0.00153217	1
1463	OG0005090	817.745	1198.05	463.815	684.487	247.232	264.793	405.985	410.561	45.2529	111.44	-0.81183	0.81183	-0.144894	0.144894	-0.0236783	0.0236783	-1.78442	1.78442	0.05168	1
1464	OG0005091	331.457	287.614	133.647	132.795	293.562	232.531	572.631	667.437	169.47	276.863	0.0236458	-0.0236458	0.858208	-0.858208	-0.565586	0.565586	-1.78004	1.78004	0.38669	1
1465	OG0005094	50.287	47.6953	153.236	186.505	69.3983	81.4318	70.3006	81.9853	70.8831	93.5348	-1.01943	1.01943	-0.830562	0.830562	-0.798783	0.798783	-1.43424	1.43424	6.22123e-05	0.121314
1466	OG0005096	148.41	210.636	315.006	278.455	754.14	680.181	157.829	149.582	395.732	350.087	0.645606	-0.645606	0.540517	-0.540517	0.281191	-0.281191	0.641528	-0.641528	0.000125996	0.244433
1467	OG0005098	147.376	283.388	2170.72	2435.09	1067.64	1008.2	963.439	1232.8	1283.16	2206.84	-0.280161	0.280161	0.139775	-0.139775	-0.598607	0.598607	-1.29177	1.29177	0.0549265	1
1468	OG0005099	196.402	274.444	133.645	136.273	232.903	294.877	95.6866	107.48	121.906	126.408	-0.0973038	0.0973038	-1.17353	1.17353	-0.580131	0.580131	-0.181216	0.181216	0.0264271	1
1469	OG0005103	441.369	506.52	150.394	165.82	145.426	164.498	72.7739	75.1091	109.438	102.618	-0.937913	0.937913	-1.18311	1.18311	-0.303587	0.303587	0.618288	-0.618288	0.163145	1
1470	OG0005105	100.339	122.028	59.8742	70.9169	94.9778	114.625	41.3732	43.5844	67.8793	90.0607	-0.836626	0.836626	-0.928814	0.928814	-0.257914	0.257914	-1.39165	1.39165	0.00204114	1
1471	OG0005106	101.025	105.389	94.7851	81.5197	130.096	120.302	86.1254	87.2747	112.67	135.492	1.25638	-1.25638	0.653128	-0.653128	-0.110671	0.110671	-1.53558	1.53558	0.88232	1
1472	OG0005109	773.132	824.577	602.359	583.154	777.834	741.411	315.161	320.536	733.563	812.951	0.507754	-0.507754	0.751434	-0.751434	-0.265044	0.265044	-1.60896	1.60896	0.696632	1
1473	OG0005112	622.144	649.865	335.539	419.416	418.534	411.177	279.311	281.922	159.078	261.628	-0.876292	0.876292	0.0699359	-0.0699359	-0.0366887	0.0366887	-1.92258	1.92258	0.078532	1
1474	OG0005113	161.388	193.317	126.698	108.287	96.9073	116.138	123.048	116.366	203.869	213.527	1.0795	-1.0795	-1.24373	1.24373	0.384546	-0.384546	-0.318811	0.318811	0.946375	1
1475	OG0005117	1101.59	1144.56	586.837	611.344	946.375	1129.48	356.783	409.187	154.231	226.357	-0.19569	0.19569	-0.843943	0.843943	-0.654561	0.654561	-1.81315	1.81315	0.010809	1
1476	OG0005118	55.4964	51.8087	355.285	372.837	185.794	138.732	94.3679	90.1299	299.694	304.205	-0.334465	0.334465	2.01208	-2.01208	0.318707	-0.318707	-0.10363	0.10363	0.253985	1
1477	OG0005122	94.2468	121.624	146.601	130.711	146.512	119.121	32.8653	34.8252	114.748	133.087	0.637847	-0.637847	1.14788	-1.14788	-0.322321	0.322321	-0.8237	0.8237	0.631396	1
1478	OG0005123	98.6192	141.574	124.484	154.173	132.941	127.13	64.0378	63.0504	114.284	105.293	-1.05875	1.05875	0.222042	-0.222042	0.0772038	-0.0772038	0.406896	-0.406896	0.718999	1
1479	OG0005124	173.667	212.594	213.206	244.097	381.28	352.026	194.052	191.97	339.397	339.125	-1.12098	1.12098	0.662028	-0.662028	0.0894732	-0.0894732	0.00663699	-0.00663699	0.742669	1
1480	OG0005125	292.504	375.186	357.498	392.301	357.575	496.655	267.195	275.365	155.612	189.737	-0.423771	0.423771	-1.48644	1.48644	-0.137478	0.137478	-0.902128	0.902128	0.012343	1
1481	OG0005128	115.645	107.035	242.966	229.957	174.611	188.341	228.788	263.94	152.479	132.507	0.498838	-0.498838	-0.686032	0.686032	-1.29374	1.29374	1.27089	-1.27089	0.901828	1
1482	OG0005130	195.485	275.12	108.687	121.845	259.351	256.856	68.9828	79.8696	1688.67	624.545	-0.242699	0.242699	0.020559	-0.020559	-0.310995	0.310995	1.95607	-1.95607	0.386002	1
1483	OG0005131	98.4711	104.623	115.955	112.113	148.134	125.6	87.6097	97.0092	86.119	93.7994	0.321042	-0.321042	1.56867	-1.56867	-0.970198	0.970198	-0.813467	0.813467	0.951319	1
1484	OG0005134	88.0248	109.183	324.481	339.285	184.863	232.729	85.8782	85.581	104.361	106.36	-0.297803	0.297803	-1.53051	1.53051	0.0231402	-0.0231402	-0.126655	0.126655	0.102922	1
1485	OG0005136	302.193	141.178	244.23	207.362	63.0177	98.3152	93.0476	79.659	114.287	94.0666	0.38547	-0.38547	-1.03304	1.03304	0.366034	-0.366034	0.458223	-0.458223	0.86781	1
1486	OG0005139	87.6629	97.1414	133.173	131.579	130.308	137.562	82.0038	91.6109	87.2757	98.0806	0.128654	-0.128654	-0.578485	0.578485	-1.18215	1.18215	-1.24531	1.24531	0.0191307	1
1487	OG0005141	339.043	438.251	198.204	256.552	190.662	162.592	202.747	256.108	189.554	301.182	-0.842649	0.842649	0.521857	-0.521857	-0.763743	0.763743	-1.49389	1.49389	0.0739684	1
1488	OG0005142	79.4983	154.031	397.571	425.785	229.957	228.686	500.593	573.433	276.597	335.386	-0.212628	0.212628	0.0171919	-0.0171919	-0.420829	0.420829	-0.596095	0.596095	0.0177652	1
1489	OG0005143	378.753	414.984	222.585	199.887	88.7963	116.41	87.4441	88.6499	181.704	200.699	0.712453	-0.712453	-1.78436	1.78436	-0.0908016	0.0908016	-0.658666	0.658666	0.265718	1
1490	OG0005145	159.365	157.643	370.292	355.977	808.7	866.27	171.509	167.356	412.353	373.338	0.644011	-0.644011	-1.12298	1.12298	0.400452	-0.400452	1.62245	-1.62245	0.373714	1
1491	OG0005147	93.4862	108.226	803.001	870.834	603.777	478.829	426.917	521.793	248.888	349.016	-0.355895	0.355895	1.01357	-1.01357	-0.878246	0.878246	-1.47067	1.47067	0.302469	1
1492	OG0005150	388.194	467.385	190.504	173.964	773.621	809.898	63.7064	69.2908	208.486	229.561	0.7801	-0.7801	-0.393803	0.393803	-0.721774	0.721774	-0.827008	0.827008	0.307537	1
1493	OG0005151	84.7612	39.532	58.9247	30.4178	67.9706	116.965	29.0098	33.2162	107.822	88.7271	1.1995	-1.1995	-0.995935	0.995935	-0.254122	0.254122	0.365216	-0.365216	0.819193	1
1494	OG0005152	254.989	275.403	256.079	258.184	166.81	161.526	192.526	228.184	496.851	492.501	-0.0917369	0.0917369	0.360663	-0.360663	-1.89942	1.89942	0.0985408	-0.0985408	0.332496	1
1495	OG0005154	1041.84	1161.97	98.417	99.7704	144.898	112.024	35.4392	35.5435	54.0264	60.664	-0.0960593	0.0960593	1.7999	-1.7999	-0.0206835	0.0206835	-0.814097	0.814097	0.601138	1
1496	OG0005155	180.833	194.503	67.4554	82.7364	75.9238	77.2239	47.3904	53.9516	42.9441	49.1726	-1.50691	1.50691	-0.125735	0.125735	-0.95891	0.95891	-1.00145	1.00145	0.00436824	1
1497	OG0005156	412.17	507.159	333.17	405.513	544.052	560.464	328.43	356.399	287.217	300.645	-1.37958	1.37958	-0.209312	0.209312	-0.575303	0.575303	-0.321762	0.321762	0.0158297	1
1498	OG0005157	340.16	372.763	557.968	745.147	851.187	895.672	808.634	922.496	710.881	974.368	-1.33438	1.33438	-0.236572	0.236572	-0.611016	0.611016	-1.45245	1.45245	0.00450307	1
1499	OG0005158	50.6811	58.8877	87.0428	91.9469	225.224	202.299	42.6927	40.9387	141.538	154.335	-0.540898	0.540898	1.05856	-1.05856	0.414027	-0.414027	-0.853887	0.853887	0.952066	1
1500	OG0005159	450.234	518.152	235.859	228.912	91.181	74.0379	150.327	165.24	231.57	242.827	0.23182	-0.23182	1.60939	-1.60939	-0.732992	0.732992	-0.368054	0.368054	0.629338	1
1501	OG0005165	392.956	515.185	318.794	351.28	77.3101	46.8656	175.877	219.826	238.268	287.286	-0.322638	0.322638	1.63159	-1.63159	-0.739126	0.739126	-0.620687	0.620687	0.975206	1
1502	OG0005168	1888.26	2614.92	1143.11	1143.36	199.14	201.341	848.81	975.256	837.642	975.167	-0.00122584	0.00122584	-0.0609136	0.0609136	-0.768342	0.768342	-0.840854	0.840854	0.038718	1
1503	OG0005169	326.717	471.95	95.5734	104.811	155.094	151.089	82.8288	103.037	58.1823	112.242	-0.254366	0.254366	0.0721711	-0.0721711	-0.599919	0.599919	-1.75027	1.75027	0.0649022	1
1504	OG0005170	498.533	492.952	322.585	336.682	430.843	378.443	171.112	185.666	337.03	338.401	-0.569223	0.569223	1.72374	-1.72374	-1.08597	1.08597	-0.054036	0.054036	0.993573	1
1505	OG0005171	411.625	507.061	501.732	498.334	864.378	930.005	288.294	313.976	355.789	417.697	0.0505153	-0.0505153	-0.543661	0.543661	-0.633883	0.633883	-1.18974	1.18974	0.0179977	1
1506	OG0005172	163.12	199.793	133.489	112.461	92.3966	129.687	62.7191	61.8857	125.367	128.811	0.846158	-0.846158	-1.66178	1.66178	0.066193	-0.066193	-0.134104	0.134104	0.573424	1
1507	OG0005173	110.368	126.8	283.88	270.112	158.422	157.041	217.25	222.152	248.757	319.432	0.363515	-0.363515	0.0640587	-0.0640587	-0.163155	0.163155	-1.81939	1.81939	0.303789	1
1508	OG0005174	115.611	123.495	246.915	234.824	110.817	172.806	53.9005	58.1831	114.056	124.535	0.231553	-0.231553	-2.01629	2.01629	-0.352489	0.352489	-0.405185	0.405185	0.111652	1
1509	OG0005177	251.993	312.485	257.027	287.839	237.038	246.229	77.142	84.4195	118.44	134.69	-0.824003	0.824003	-0.277105	0.277105	-0.65636	0.65636	-0.935422	0.935422	0.000575233	1
1510	OG0005179	66.5856	83.5029	102.527	102.03	255.167	260.349	51.8393	45.4886	116.829	140.035	0.0324805	-0.0324805	-0.134259	0.134259	0.871394	-0.871394	-1.20653	1.20653	0.729836	1
1511	OG0005183	40.4318	53.8698	345.174	332.338	195.597	193.156	70.5487	68.8677	166.466	178.785	0.270215	-0.270215	0.0895391	-0.0895391	0.171965	-0.171965	-0.508899	0.508899	0.964817	1
1512	OG0005185	490.992	635.937	433.486	476.08	117.911	92.6901	107.554	133.504	283.985	262.966	-0.462458	0.462458	1.18265	-1.18265	-1.06309	1.06309	0.379491	-0.379491	0.979807	1
1513	OG0005188	260.004	291.891	467.567	524.217	1539.14	1431.66	714.47	966.475	452.99	804.132	-0.368011	0.368011	0.23309	-0.23309	-0.965906	0.965906	-1.79964	1.79964	0.0559862	1
1514	OG0005191	257.032	396.342	131.592	173.64	428.06	483.509	225.492	244.688	189.092	215.932	-1.07284	1.07284	-0.473721	0.473721	-0.317944	0.317944	-0.516068	0.516068	0.00220793	1
1515	OG0005195	423.815	410.349	324.325	367.795	446.961	477.285	135.823	130.12	145.222	184.392	-0.945343	0.945343	-0.493837	0.493837	0.322773	-0.322773	-1.78864	1.78864	0.0586153	1
1516	OG0005196	129.769	173.951	108.527	130.362	27.3667	129.423	50.3558	58.3947	31.4	48.3709	-0.273131	0.273131	-1.94511	1.94511	-0.220897	0.220897	-0.635745	0.635745	0.0356366	1
1517	OG0005197	555.146	770.237	357.498	410.379	660.034	677.489	151.728	222.154	353.478	482.907	-0.485143	0.485143	-0.0919346	0.0919346	-1.32694	1.32694	-1.09014	1.09014	0.00941081	1
1518	OG0005198	147.755	147.026	188.94	185.463	119.895	107.632	74.5038	72.8865	225.11	258.423	0.222116	-0.222116	1.28929	-1.28929	0.262481	-0.262481	-1.64803	1.64803	0.944386	1
1519	OG0005199	364.174	442.317	529.536	531.008	902.592	918.159	270.74	309.957	365.948	481.311	-0.0163133	0.0163133	-0.100506	0.100506	-0.793909	0.793909	-1.60062	1.60062	0.0524212	1
1520	OG0005201	67.8227	79.8829	123.064	125.493	174.373	186.432	55.7137	62.8378	101.59	125.871	-0.137041	0.137041	-0.468693	0.468693	-0.842654	0.842654	-1.49686	1.49686	0.011773	1
1521	OG0005202	305.29	420.488	311.685	406.032	75.2203	111.26	103.185	108.741	146.382	135.222	-0.973327	0.973327	-1.43097	1.43097	-0.194124	0.194124	0.293421	-0.293421	0.0794053	1
1522	OG0005203	194.523	190.148	86.2545	94.9018	102.504	98.0982	58.7631	51.6243	48.7161	49.4398	-1.19946	1.19946	0.551907	-0.551907	1.62503	-1.62503	-0.185275	0.185275	0.654946	1
1523	OG0005204	22.7694	40.3709	145.337	204.757	213.642	135.186	84.0914	97.5096	130.215	174.509	-0.840054	0.840054	1.11321	-1.11321	-0.365711	0.365711	-0.719448	0.719448	0.547168	1
1524	OG0005206	64.0367	65.446	112.004	109.156	387.492	435.378	163.961	170.601	239.653	284.341	0.25655	-0.25655	-1.15935	1.15935	-0.395446	0.395446	-1.69903	1.69903	0.0483953	1
1525	OG0005210	132.956	113.016	113.9	118.021	118.718	163.534	152.06	147.999	86.8116	97.009	-0.200455	0.200455	-1.79123	1.79123	0.152674	-0.152674	-0.625828	0.625828	0.0849037	1
1526	OG0005219	222.206	250.35	575.265	506.098	426.862	685.141	262.91	268.49	547.654	676.655	0.502892	-0.502892	-1.82613	1.82613	-0.0825542	0.0825542	-0.828416	0.828416	0.167181	1
1527	OG0005220	89.3642	97.8659	186.569	165.125	247.146	207.716	131.703	130.224	240.06	315.028	0.727992	-0.727992	1.03501	-1.03501	0.0673852	-0.0673852	-1.61254	1.61254	0.900604	1
1528	OG0005221	46.0612	63.4045	248.337	278.278	552.714	508.674	196.729	246.486	388.574	408.878	-0.579551	0.579551	0.422959	-0.422959	-1.14437	1.14437	-0.259534	0.259534	0.142505	1
1529	OG0005223	33.7258	37.8591	224.484	229.783	174.401	126.729	146.867	155.614	198.556	210.32	-0.142391	0.142391	1.93259	-1.93259	-0.353052	0.353052	-0.351216	0.351216	0.515602	1
1530	OG0005225	375.817	441.38	217.058	226.654	114.091	119.915	150.658	165.557	458.534	450.571	-0.462957	0.462957	-0.532693	0.532693	-1.00863	1.00863	0.187508	-0.187508	0.0399877	1
1531	OG0005229	144.031	219.846	191.308	212.752	110.031	69.1626	148.017	156.765	172.007	204.975	-0.344641	0.344641	1.48102	-1.48102	-0.186395	0.186395	-0.567893	0.567893	0.782748	1
1532	OG0005231	100.797	142.214	626.688	717.512	121.582	148.367	81.1804	79.6569	68.572	103.156	-0.494241	0.494241	-0.725795	0.725795	0.0692871	-0.0692871	-1.47309	1.47309	0.0271996	1
1533	OG0005233	161.263	179.041	85.779	103.942	607.696	564.024	325.795	361.265	86.8093	116.515	-1.05162	1.05162	0.409418	-0.409418	-0.567101	0.567101	-1.60486	1.60486	0.0587549	1
1534	OG0005234	58.5677	78.7396	67.9309	66.3977	141.236	97.4802	59.5048	65.3767	58.8749	69.483	0.0954473	-0.0954473	1.53278	-1.53278	-0.393192	0.393192	-0.691104	0.691104	0.709961	1
1535	OG0005236	226.486	257.54	180.09	185.806	298.336	296.459	144.311	152.863	183.782	214.86	-0.312059	0.312059	0.0630471	-0.0630471	-0.574904	0.574904	-1.5574	1.5574	0.0511156	1
1536	OG0005237	234.107	234.768	247.707	283.318	80.5457	78.5863	60.1642	61.781	159.999	229.828	-0.740435	0.740435	0.135953	-0.135953	-0.146386	0.146386	-1.97778	1.97778	0.0853602	1
1537	OG0005242	188.037	241.328	316.581	368.837	101.824	79.9431	61.7301	57.4426	105.282	109.305	-0.836802	0.836802	1.32125	-1.32125	0.394876	-0.394876	-0.205749	0.205749	0.622623	1
1538	OG0005243	413.807	588.687	261.765	219.182	1248.36	1193.82	402.193	453.299	623.843	646.462	0.909412	-0.909412	0.229404	-0.229404	-0.6136	0.6136	-0.182886	0.182886	0.721642	1
1539	OG0005246	85.9936	68.4477	87.3587	83.2578	82.1105	47.305	55.5488	53.9516	93.0454	102.087	0.171707	-0.171707	1.9213	-1.9213	0.104203	-0.104203	-0.331	0.331	0.233045	1
1540	OG0005248	195.91	286.655	148.024	168.542	69.0724	88.0209	36.2633	38.6124	63.264	91.1243	-0.464381	0.464381	-0.864212	0.864212	-0.224783	0.224783	-1.29293	1.29293	0.00513138	1
1541	OG0005254	579.392	580.809	235.257	199.179	235.782	213.11	149.091	159.74	387.189	420.901	1.5834	-1.5834	0.962976	-0.962976	-0.657471	0.657471	-0.795438	0.795438	0.537701	1
1542	OG0005255	242.68	160.33	350.073	338.766	266.542	261.327	362.685	372.959	615.464	579.9	0.167536	-0.167536	0.100821	-0.100821	-0.142536	0.142536	0.303653	-0.303653	0.155069	1
1543	OG0005256	214.85	262.953	694.617	730.204	205.821	190.819	336.424	325.831	236.89	279.541	-0.381716	0.381716	0.578042	-0.578042	0.244461	-0.244461	-1.26219	1.26219	0.49984	1
1544	OG0005264	417.439	453.248	894.138	768.619	651.328	588.977	503.896	541.841	124.909	167.294	0.891379	-0.891379	0.593611	-0.593611	-0.428475	0.428475	-1.71278	1.71278	0.707032	1
1545	OG0005265	90.0393	98.1501	54.3435	58.0545	554.607	598.804	61.4004	69.6082	99.2793	110.104	-0.66739	0.66739	-0.774546	0.774546	-1.26638	1.26638	-1.04498	1.04498	6.43176e-05	0.125355
1546	OG0005266	79.4479	102.28	466.502	387.436	169.246	196.749	273.791	292.501	400.345	390.438	1.11103	-1.11103	-0.901682	0.901682	-0.39647	0.39647	0.150321	-0.150321	0.976886	1
1547	OG0005268	372.7	409.456	137.438	183.03	191.241	66.221	224.915	277.268	61.6455	141.638	-0.463495	0.463495	1.58202	-1.58202	-0.339645	0.339645	-1.28202	1.28202	0.779154	1
1548	OG0005269	49.6105	63.2749	315.1	416.394	173.542	205.312	252.409	298.066	88.6587	118.656	-1.12093	1.12093	-0.678819	0.678819	-0.671387	0.671387	-1.17127	1.17127	8.01837e-05	0.155877
1549	OG0005270	547.834	639.996	304.575	332.51	296.329	296.624	234.312	294.833	198.559	174.509	-0.586185	0.586185	-0.00664357	0.00664357	-1.529	1.529	0.861772	-0.861772	0.409232	1
1550	OG0005274	58.7051	68.5272	196.521	196.582	153.226	131.566	121.234	106.951	231.801	249.337	-0.00253499	0.00253499	1.23777	-1.23777	1.01867	-1.01867	-0.593154	0.593154	0.222283	1
1551	OG0005275	844.899	1508.02	861.282	1096.26	316.516	300.911	198.459	236.859	125.602	286.217	-0.504876	0.504876	0.106303	-0.106303	-0.371031	0.371031	-1.64042	1.64042	0.0608576	1
1552	OG0005277	386.63	152.007	383.088	568.552	486.828	588.265	37.2532	68.6561	252.813	200.699	-0.711377	0.711377	-0.344402	0.344402	-1.08231	1.08231	0.419453	-0.419453	0.106884	1
1553	OG0005280	85.957	100.318	153.236	172.599	0	147.886	108.624	111.606	140.609	148.322	-0.125414	0.125414	-2.11041	2.11041	-0.0285705	0.0285705	-0.056335	0.056335	0.159111	1
1554	OG0005283	212.343	250.702	177.721	204.927	417.944	445.175	104.34	126.945	126.059	181.193	-0.645101	0.645101	-0.286242	0.286242	-0.886784	0.886784	-1.62807	1.62807	0.00512461	1
1555	OG0005284	168.841	130.987	129.382	58.4022	344.121	435.053	150.905	184.07	1298.02	380.553	1.15616	-1.15616	-0.356967	0.356967	-0.302841	0.302841	1.67183	-1.67183	0.186771	1
1556	OG0005285	321.905	501.067	1816.4	1859.13	1782.63	1825	979.356	1042.11	1101.77	1593.3	-0.0861866	0.0861866	-0.0870669	0.0870669	-0.230127	0.230127	-1.35196	1.35196	0.0890972	1
1557	OG0005287	65.8648	99.3392	180.882	185.462	123.366	157.623	121.565	123.242	32.5544	77.5003	-0.0561721	0.0561721	-0.547769	0.547769	-0.0307941	0.0307941	-1.83494	1.83494	0.0845163	1
1558	OG0005288	85.0681	96.7496	275.507	268.892	231.452	219.4	202.087	263.834	151.459	179.055	0.150024	-0.150024	0.330015	-0.330015	-1.63613	1.63613	-1.0308	1.0308	0.152634	1
1559	OG0005289	111.472	130.647	191.624	178.506	130.709	110.582	88.1858	87.17	84.2719	117.854	0.36633	-0.36633	0.862167	-0.862167	0.0598782	-0.0598782	-1.71723	1.71723	0.796198	1
1560	OG0005292	321.953	429.829	486.756	539.584	470.766	408.853	491.203	494.769	241.964	376.544	-0.39724	0.39724	0.543214	-0.543214	-0.0279177	0.0279177	-1.67927	1.67927	0.285832	1
1561	OG0005299	212.743	245.036	468.235	655.811	72.5072	77.4437	94.0374	98.8055	75.0367	122.667	-1.16356	1.16356	-0.229543	0.229543	-0.172399	0.172399	-1.67982	1.67982	0.0206386	1
1562	OG0005300	127.427	255.748	186.567	205.972	304.039	317.336	116.208	128.108	160.925	227.958	-0.273384	0.273384	-0.118343	0.118343	-0.269369	0.269369	-0.953272	0.953272	0.0223283	1
1563	OG0005303	46.5789	78.7162	53.2392	71.2663	93.6019	179.634	54.0653	53.1053	262.746	149.388	-0.600486	0.600486	-1.30584	1.30584	0.0371508	-0.0371508	1.14072	-1.14072	0.637551	1
1564	OG0005304	137.904	139.899	239.49	213.62	137.829	145.266	315.242	327.941	258.821	269.645	1.74621	-1.74621	-0.803408	0.803408	-0.603856	0.603856	-0.626409	0.626409	0.872667	1
1565	OG0005305	262.185	287.725	154.5	138.358	286.832	306.797	120.824	123.349	185.627	181.458	1.4434	-1.4434	-0.880726	0.880726	-0.270861	0.270861	0.297422	-0.297422	0.68821	1
1566	OG0005311	139.566	114.728	147.865	156.61	181.369	197.963	54.8903	61.251	140.838	162.483	-0.426892	0.426892	-0.650173	0.650173	-0.813986	0.813986	-1.06063	1.06063	0.000232775	0.448791
1567	OG0005313	130.103	181.135	86.414	110.721	113.22	112.598	41.3732	39.3529	118.904	122.397	-1.26237	1.26237	0.0282039	-0.0282039	0.256216	-0.256216	-0.148194	0.148194	0.282457	1
1568	OG0005314	163.789	163.231	253.865	305.568	243.585	260.011	154.533	167.887	225.341	301.444	-1.09267	1.09267	-0.385639	0.385639	-0.489667	0.489667	-1.70798	1.70798	0.00537218	1
1569	OG0005315	187.652	211.053	158.765	152.782	330.907	20.5117	115.466	123.241	137.606	165.156	0.0457351	-0.0457351	2.10366	-2.10366	-0.0775809	0.0775809	-0.216724	0.216724	0.277493	1
1570	OG0005316	528.009	1096	1566.8	1979.94	128.433	223.374	500.707	743.215	508.331	1331.6	-0.369617	0.369617	-0.856318	0.856318	-0.618612	0.618612	-1.41979	1.41979	0.00213076	1
1571	OG0005317	301.933	162.387	427.007	193.979	108.929	107.25	23.9643	37.1388	374.721	221.277	1.35728	-1.35728	0.0280903	-0.0280903	-0.779858	0.779858	0.931218	-0.931218	0.297923	1
1572	OG0005318	1419.1	2512.87	72.0351	54.2306	206.778	252.508	48.5434	48.5565	129.294	241.854	0.670282	-0.670282	-0.473294	0.473294	-0.000638435	0.000638435	-1.44162	1.44162	0.359518	1
1573	OG0005319	87.4277	100.674	184.161	257.444	107.628	122.071	81.4277	106.635	177.781	291.294	-1.04732	1.04732	-0.39683	0.39683	-0.845928	0.845928	-1.52726	1.52726	0.00119659	1
1574	OG0005322	96.6735	112.663	76.9339	56.8378	61.0184	89.4931	31.8128	30.5726	119.133	122.394	1.25217	-1.25217	-1.5769	1.5769	0.165707	-0.165707	-0.112556	0.112556	0.874553	1
1575	OG0005323	113.67	175.697	807.414	786.17	675.255	483.803	261.672	336.087	717.12	1141.66	0.0752946	-0.0752946	0.932912	-0.932912	-0.703103	0.703103	-1.28996	1.28996	0.497519	1
1576	OG0005331	759.222	907.334	1111.67	1269.9	748.949	543.317	900.752	1078.02	350.248	466.605	-0.548807	0.548807	1.31444	-1.31444	-0.740011	0.740011	-1.17665	1.17665	0.487273	1
1577	OG0005334	147.35	179.839	105.054	110.026	135.491	123.581	102.196	124.618	151.689	236.512	-0.185318	0.185318	0.368527	-0.368527	-0.792477	0.792477	-1.75162	1.75162	0.115582	1
1578	OG0005337	43.9918	74.5922	482.929	498.657	338.41	259.209	324.476	352.482	89.6192	148.603	-0.0885277	0.0885277	0.732188	-0.732188	-0.228562	0.228562	-1.36795	1.36795	0.46523	1
1579	OG0005338	183.878	254.014	1332.04	1546.41	1581.07	1607.29	732.191	768.968	936.912	1009.36	-0.866368	0.866368	-0.0956408	0.0956408	-0.285	0.285	-0.433025	0.433025	0.0110799	1
1580	OG0005342	55.0886	76.4722	94.6303	80.6784	125.49	143.236	38.2405	40.5177	136.68	103.693	0.708483	-0.708483	-0.587902	0.587902	-0.257393	0.257393	1.22169	-1.22169	0.395837	1
1581	OG0005343	80.8209	116.698	148.497	139.053	154.465	191.294	81.4268	92.3525	79.6543	126.673	0.218897	-0.218897	-0.709926	0.709926	-0.419033	0.419033	-1.51884	1.51884	0.0546093	1
1582	OG0005344	165.266	190.21	91.4692	79.9553	135.158	129.764	120.492	138.688	148	141.641	1.15337	-1.15337	0.349606	-0.349606	-1.20558	1.20558	0.376999	-0.376999	0.646766	1
1583	OG0005345	951.336	1338.99	664.287	847.527	1054.05	1086.74	784.111	832.547	640.467	756.296	-1.13468	1.13468	-0.142915	0.142915	-0.280477	0.280477	-0.776336	0.776336	0.0112189	1
1584	OG0005347	84.2679	111.816	338.383	368.662	36.3726	117.976	41.1259	40.9387	79.4257	90.8624	-0.164332	0.164332	-2.02876	2.02876	0.00875412	-0.00875412	-0.257716	0.257716	0.119609	1
1585	OG0005350	174.219	209.106	80.7	72.6568	179.401	183.515	92.7344	96.0307	91.8379	87.9468	1.01836	-1.01836	-0.220149	0.220149	-0.339063	0.339063	0.420244	-0.420244	0.360442	1
1586	OG0005351	146.307	180.572	146.445	153.827	383.25	362.241	151.73	185.234	439.599	614.12	-0.233938	0.233938	0.268157	-0.268157	-0.946069	0.946069	-1.57591	1.57591	0.0723118	1
1587	OG0005353	665.731	669.798	937.268	1104.78	728.995	818.215	563.896	595.372	493.857	699.638	-0.864364	0.864364	-0.607624	0.607624	-0.286104	0.286104	-1.81681	1.81681	0.00861725	1
1588	OG0005354	37.1895	23.8875	100.313	64.6595	203.089	195.405	43.3512	46.2281	136.451	157.406	1.44522	-1.44522	0.128947	-0.128947	-0.214766	0.214766	-0.476857	0.476857	0.492107	1
1589	OG0005355	301.704	278.318	749.908	591.843	1415.8	1427.69	444.87	445.554	901.592	917.977	2.00064	-2.00064	-0.0710508	0.0710508	-0.0130323	0.0130323	-0.152931	0.152931	0.276274	1
1590	OG0005360	425.722	593.79	256.236	294.792	261.229	298.769	317.304	348.569	205.023	289.955	-0.568322	0.568322	-0.544478	0.544478	-0.38136	0.38136	-1.39367	1.39367	0.00417686	1
1591	OG0005362	369.143	338.091	586.562	546.825	249.135	313.521	223.267	253.996	198.328	298.242	0.301422	-0.301422	-0.983801	0.983801	-0.553542	0.553542	-1.72985	1.72985	0.0483068	1
1592	OG0005366	514.479	598.1	415.445	459.861	490.997	709.55	289.366	333.654	394.058	456.06	-0.473252	0.473252	-1.69779	1.69779	-0.662966	0.662966	-0.680194	0.680194	0.00417365	1
1593	OG0005372	368.007	477.292	295.728	288.011	393.115	388.116	107.472	113.829	181.014	185.733	0.209476	-0.209476	0.101386	-0.101386	-0.455209	0.455209	-0.203922	0.203922	0.445202	1
1594	OG0005374	286.714	337.514	282.305	257.248	519.137	561.368	166.976	167.779	456.221	522.723	0.806324	-0.806324	-0.678592	0.678592	-0.0416377	0.0416377	-1.17949	1.17949	0.401873	1
1595	OG0005377	152.113	154.005	92.5719	102.204	122.947	118.676	40.0537	38.5066	32.0903	42.7588	-0.68431	0.68431	0.244621	-0.244621	0.272503	-0.272503	-1.97239	1.97239	0.202092	1
1596	OG0005378	24.1669	56.8912	228.115	211.185	786.535	837.491	49.1203	67.1751	36.9411	60.1295	0.164621	-0.164621	-0.134026	0.134026	-0.66316	0.66316	-1.02041	1.02041	0.0696258	1
1597	OG0005379	162.219	196.447	222.115	236.737	85.2297	93.7668	112.911	147.785	228.342	294.501	-0.314159	0.314159	-0.470179	0.470179	-1.31876	1.31876	-1.24742	1.24742	0.00383539	1
1598	OG0005385	386.96	491.417	907.528	1186.48	1032.11	1008.01	534.781	627.83	217.031	409.952	-0.774549	0.774549	0.0686751	-0.0686751	-0.465346	0.465346	-1.78905	1.78905	0.0365702	1
1599	OG0005388	503.75	284.497	341.383	331.99	324.593	278.084	546.183	674.659	302.933	240.609	0.0901458	-0.0901458	0.498735	-0.498735	-0.680109	0.680109	0.741038	-0.741038	0.488374	1
1600	OG0005389	264.977	320.534	110.109	147.57	151.705	146.763	67.3344	74.686	72.2661	102.354	-1.23082	1.23082	0.140199	-0.140199	-0.438248	0.438248	-1.45877	1.45877	0.0283503	1
1601	OG0005391	399.954	532.259	479.3	460.788	821.806	854.718	294.309	284.079	496.627	489.321	0.28633	-0.28633	-0.285446	0.285446	0.257194	-0.257194	0.107754	-0.107754	0.363581	1
1602	OG0005394	474.762	538.662	512.945	595.49	225.513	206.079	452.208	537.167	444.45	594.614	-0.791763	0.791763	0.478764	-0.478764	-0.912987	0.912987	-1.53653	1.53653	0.0601556	1
1603	OG0005395	129.2	151.859	204.894	223.701	514.671	347.266	165.089	180.069	162.543	180.389	-0.413259	0.413259	1.82909	-1.82909	-0.408744	0.408744	-0.490071	0.490071	0.758066	1
1604	OG0005400	678.764	666.014	186.095	141.486	116.515	139.352	601.691	609.962	854.259	890.986	1.75511	-1.75511	-1.15038	1.15038	-0.0879807	0.0879807	-0.271228	0.271228	0.891557	1
1605	OG0005402	69.1682	105.787	141.707	157.999	90.0326	97.9856	49.1195	58.6063	127.218	136.828	-0.480335	0.480335	-0.373767	0.373767	-0.77816	0.77816	-0.321591	0.321591	0.000507924	0.97369
1606	OG0005404	45.4442	48.0186	106.635	99.2489	198.698	218.675	49.9445	46.8639	152.846	158.475	1.0101	-1.0101	-1.34769	1.34769	0.896002	-0.896002	-0.509056	0.509056	0.976568	1
1607	OG0005405	26.8639	47.0734	61.6119	71.7877	129.455	134.639	43.2688	50.0375	53.3337	56.3881	-0.548758	0.548758	-0.141231	0.141231	-0.52187	0.52187	-0.200261	0.200261	0.00330269	1
1608	OG0005406	693.991	944.322	521.633	610.791	272.237	105.097	358.36	406.426	172.238	220.475	-0.33757	0.33757	1.89918	-1.89918	-0.269469	0.269469	-0.526642	0.526642	0.652748	1
1609	OG0005407	120.289	128.089	579.453	622.261	778.046	698.564	286.232	323.603	143.606	258.421	-0.251236	0.251236	0.379631	-0.379631	-0.43219	0.43219	-2.01418	2.01418	0.158435	1
1610	OG0005408	508.167	464.675	231.751	221.96	541.38	591.201	158.407	165.875	267.128	312.404	0.43585	-0.43585	-0.888388	0.888388	-0.465061	0.465061	-1.57777	1.57777	0.0810371	1
1611	OG0005412	580.218	503.222	380.088	438.016	389.409	432.513	434.418	401.04	186.553	228.49	-0.957283	0.957283	-0.709008	0.709008	0.540126	-0.540126	-1.36605	1.36605	0.0755828	1
1612	OG0005415	118.42	111.887	129.224	146.181	220.002	229.873	96.1811	95.2087	155.843	127.207	-1.05464	1.05464	-0.375825	0.375825	0.0870196	-0.0870196	1.73287	-1.73287	0.824245	1
1613	OG0005417	38.6908	54.2647	1091.29	1117.11	883.597	720.488	593.895	607.113	1042.89	789.704	-0.103204	0.103204	0.897557	-0.897557	-0.0971531	0.0971531	1.21952	-1.21952	0.0939865	1
1614	OG0005419	197.883	242.363	733.164	791.033	375.626	375.089	138.212	136.043	316.539	261.096	-0.556765	0.556765	0.0104781	-0.0104781	0.11599	-0.11599	1.40756	-1.40756	0.436895	1
1615	OG0005421	119.186	88.3756	903.765	861.774	1056.87	992.911	1541.35	1788.33	1157.87	1453	0.246612	-0.246612	0.323547	-0.323547	-0.769125	0.769125	-1.17211	1.17211	0.240356	1
1616	OG0005425	241.444	276.966	535.376	444.1	345.525	419.263	297.937	322.332	584.824	686.546	1.12964	-1.12964	-1.16876	1.16876	-0.476762	0.476762	-0.969878	0.969878	0.352316	1
1617	OG0005432	322.473	413.334	309.788	330.252	225.814	254.848	197.47	217.498	249.353	346.071	-0.307555	0.307555	-0.581038	0.581038	-0.464267	0.464267	-1.56248	1.56248	0.0108859	1
1618	OG0005435	1842.18	2133.57	334.274	624.345	66.6904	99.4331	467.467	663.394	381.417	504.284	-1.4922	1.4922	-0.971971	0.971971	-0.85439	0.85439	-0.684094	0.684094	0.000186691	0.361247
1619	OG0005437	405.091	543.492	445.332	523.707	344.501	374.647	509.991	610.252	286.984	339.125	-0.813035	0.813035	-0.421391	0.421391	-0.899686	0.899686	-0.837147	0.837147	7.02996e-05	0.136873
1620	OG0005438	109.452	154.051	132.385	137.838	170.092	167.088	145.961	173.915	1499.12	397.387	-0.0699747	0.0699747	0.0308963	-0.0308963	-0.303032	0.303032	2.01441	-2.01441	0.312827	1
1621	OG0005440	359.204	403.126	324.165	369.359	105.991	86.4224	243.872	297.474	360.109	417.759	-0.758604	0.758604	1.18391	-1.18391	-1.15268	1.15268	-0.862757	0.862757	0.332719	1
1622	OG0005441	141.365	230.732	206.316	248.035	140.767	144.651	281.289	347.301	317.694	411.551	-0.635685	0.635685	-0.094189	0.094189	-0.727026	0.727026	-0.891015	0.891015	0.00296729	1
1623	OG0005448	98.3336	101.562	111.055	126.536	63.8453	103.734	66.0166	59.5573	93.7381	128.811	-0.464249	0.464249	-1.69592	1.69592	0.366487	-0.366487	-1.12284	1.12284	0.0590387	1
1624	OG0005455	179.445	201.345	382.3	360.673	335.472	409.436	226.976	229.877	325.313	366.387	0.465701	-0.465701	-1.58858	1.58858	-0.101591	0.101591	-0.950035	0.950035	0.141177	1
1625	OG0005456	205.018	275.017	421.43	428.23	111.699	241.06	200.849	212.421	512.101	509.364	-0.0429018	0.0429018	-1.9658	1.9658	-0.150112	0.150112	0.0143637	-0.0143637	0.163637	1
1626	OG0005457	362.927	640.865	779.448	1147.88	95.2003	88.3368	251.288	358.196	239.886	227.958	-1.06119	1.06119	0.207593	-0.207593	-0.97373	0.97373	0.141541	-0.141541	0.134651	1
1627	OG0005460	204.623	226.247	52.9217	45.7153	110.951	110.697	34.4502	28.9858	62.1073	69.483	1.14193	-1.14193	0.0179444	-0.0179444	1.34639	-1.34639	-0.876089	0.876089	0.308462	1
1628	OG0005461	685.254	1013.52	661.251	917.924	1659.18	1693.57	836.94	993.132	352.326	565.752	-0.974474	0.974474	-0.0614946	0.0614946	-0.511693	0.511693	-1.39376	1.39376	0.0112052	1
1629	OG0005463	298.164	296.49	311.685	292.706	536.526	528.441	289.364	312.706	364.794	360.777	1.3101	-1.3101	0.316713	-0.316713	-1.61747	1.61747	0.230946	-0.230946	0.893868	1
1630	OG0005464	103.777	88.2026	41.8634	48.8423	110.788	127.168	37.8293	30.8899	57.4896	60.3968	-0.974616	0.974616	-0.871963	0.871963	1.27915	-1.27915	-0.312383	0.312383	0.571912	1
1631	OG0005465	99.502	99.0252	621.16	849.265	621.445	692.027	241.728	309.323	215.413	352.225	-1.04014	1.04014	-0.360306	0.360306	-0.822467	0.822467	-1.61604	1.61604	0.00200131	1
1632	OG0005467	55.5835	55.5064	291.306	330.946	229.023	260.055	265.794	342.857	70.1904	129.877	-0.401792	0.401792	-0.400197	0.400197	-0.798585	0.798585	-1.88166	1.88166	0.0125278	1
1633	OG0005469	63.3555	85.6439	96.3649	89.5152	178.674	238.747	55.3024	55.3269	184.015	204.443	0.359765	-0.359765	-1.40505	1.40505	-0.0021577	0.0021577	-0.513405	0.513405	0.199468	1
1634	OG0005471	251.539	283.767	189.728	161.303	497.779	403.009	92.7179	94.4682	321.614	205.242	0.648673	-0.648673	0.842784	-0.842784	-0.0749043	0.0749043	1.76939	-1.76939	0.0250632	1
1635	OG0005473	92.5317	101.81	193.994	177.988	310.735	313.518	108.131	103.249	145.687	200.432	0.529636	-0.529636	-0.0548716	0.0548716	0.284288	-0.284288	-1.94687	1.94687	0.483805	1
1636	OG0005475	38.5533	38.7047	53.2376	45.5398	83.1864	92.1216	37.582	34.4867	48.947	45.6984	1.52852	-1.52852	-0.999674	0.999674	0.842384	-0.842384	0.673204	-0.673204	0.226518	1
1637	OG0005479	280.422	304.963	173.774	180.073	247.798	274.063	151.563	156.355	231.575	224.484	-0.529232	0.529232	-1.49628	1.49628	-0.462624	0.462624	0.462254	-0.462254	0.12359	1
1638	OG0005481	941.078	1134.97	145.021	129.149	102.194	337.046	73.3508	69.0792	160.463	163.018	0.224624	-0.224624	-2.07455	2.07455	0.116364	-0.116364	-0.030644	0.030644	0.297633	1
1639	OG0005482	484.437	405.436	56.0812	61.185	232.161	181.041	26.0437	21.3691	59.0781	28.0604	-0.229735	0.229735	0.653037	-0.653037	0.520424	-0.520424	1.87892	-1.87892	0.0623556	1
1640	OG0005483	96.4383	120.714	112.636	97.3369	113.946	106.758	50.7687	46.1223	84.0411	95.94	0.967215	-0.967215	0.432334	-0.432334	0.636567	-0.636567	-0.877597	0.877597	0.350194	1
1641	OG0005485	583.554	729.25	298.414	429.496	549.846	614.067	254.504	300.438	207.101	331.113	-1.16386	1.16386	-0.35661	0.35661	-0.53496	0.53496	-1.48916	1.48916	0.00324444	1
1642	OG0005486	330.959	255.563	195.888	184.075	199.274	233.229	130.383	121.656	215.646	196.423	0.401151	-0.401151	-1.01297	1.01297	0.446796	-0.446796	0.601915	-0.601915	0.695873	1
1643	OG0005487	45.3449	83.5665	33.9647	43.2802	168.116	207.381	92.8836	109.596	184.936	224.216	-0.71113	0.71113	-0.616605	0.616605	-0.486705	0.486705	-0.566104	0.566104	1.95134e-06	0.00383242
1644	OG0005490	299.489	378.126	373.295	222.133	384.831	402.918	214.695	232.627	236.883	269.11	1.85694	-1.85694	-0.167947	0.167947	-0.293222	0.293222	-0.465877	0.465877	0.56838	1
1645	OG0005491	88.1318	108.034	407.187	452.031	417.285	902.426	438.293	566.07	522.685	770.037	-0.246977	0.246977	-1.7396	1.7396	-0.602035	0.602035	-0.905463	0.905463	0.00818468	1
1646	OG0005492	80.4086	107.118	224.641	229.785	166.8	175.589	114.97	142.177	169.006	264.837	-0.0843413	0.0843413	-0.19126	0.19126	-0.788317	0.788317	-1.64581	1.64581	0.0367367	1
1647	OG0005493	470.91	618.661	215.638	224.568	104.405	68.3826	152.331	189.677	145.426	206.814	-0.133093	0.133093	1.36768	-1.36768	-0.716362	0.716362	-1.14332	1.14332	0.700997	1
1648	OG0005500	166.731	253.998	491.148	649.724	753.879	725.187	395.436	518.569	370.33	456.45	-0.973599	0.973599	0.135879	-0.135879	-0.94364	0.94364	-0.729613	0.729613	0.0143029	1
1649	OG0005502	60.8509	80.5255	881.189	1396.96	397.111	417.645	331.478	424.524	125.595	236.507	-1.13129	1.13129	-0.125937	0.125937	-0.614995	0.614995	-1.53053	1.53053	0.00766976	1
1650	OG0005503	361.86	508.575	716.945	828.544	605.091	619.838	131.291	151.912	989.096	1608.53	-0.494551	0.494551	-0.0824509	0.0824509	-0.498696	0.498696	-1.63319	1.63319	0.0282893	1
1651	OG0005509	220.095	320.764	704.885	1074.18	0	167.176	670.455	626.262	279.593	352.493	-0.421347	0.421347	-2.02981	2.02981	0.0691782	-0.0691782	-0.2341	0.2341	0.0964036	1
1652	OG0005512	142.182	186.365	292.412	283.492	150.86	164.572	232.745	238.129	104.82	138.966	0.164357	-0.164357	-0.461296	0.461296	-0.121333	0.121333	-1.48628	1.48628	0.110751	1
1653	OG0005513	41.6551	48.5545	505.581	588.049	223.716	215.582	137.636	151.066	128.816	158.865	-1.01266	1.01266	0.248647	-0.248647	-0.624692	0.624692	-1.4027	1.4027	0.031408	1
1654	OG0005514	659.507	767.115	653.861	801.119	1505.95	1405.06	629.415	774.684	511.865	858.382	-0.708652	0.708652	0.242675	-0.242675	-0.724408	0.724408	-1.77066	1.77066	0.0437337	1
1655	OG0005517	1888.28	1827.76	1751.16	2209.19	4083.74	3679.96	2315.47	2457.76	1456.87	2100.53	-1.0975	1.0975	0.493528	-0.493528	-0.282881	0.282881	-1.71698	1.71698	0.10438	1
1656	OG0005518	241.271	181.711	91.782	87.9491	140.136	100.62	36.0161	36.7083	72.2684	67.6123	0.205582	-0.205582	1.5823	-1.5823	-0.0917532	0.0917532	0.320882	-0.320882	0.102005	1
1657	OG0005522	157.115	188.389	300.154	322.602	137.299	198.781	241.4	317.574	125.6	249.607	-0.185041	0.185041	-0.939106	0.939106	-0.69956	0.69956	-1.69663	1.69663	0.00745872	1
1658	OG0005523	1475.17	2249.02	592.723	730.025	228.082	213.984	494.582	570.299	343.991	442.42	-0.800365	0.800365	0.245904	-0.245904	-0.548257	0.548257	-0.965071	0.965071	0.0344386	1
1659	OG0005525	61.4541	57.9898	174.406	155.218	615.794	617.011	158.57	164.605	194.62	171.912	1.34594	-1.34594	-0.0228382	0.0228382	-0.431747	0.431747	1.43242	-1.43242	0.133996	1
1660	OG0005527	26.305	68.2544	147.212	133.421	149.843	109.071	125.851	131.389	142.914	168.363	0.216823	-0.216823	0.694784	-0.694784	-0.0949859	0.0949859	-0.360717	0.360717	0.503832	1
1661	OG0005528	38.9199	54.3414	117.535	113.502	354.624	359.975	81.4277	87.1689	175.932	156.604	0.20624	-0.20624	-0.0884564	0.0884564	-0.4023	0.4023	0.686664	-0.686664	0.561703	1
1662	OG0005529	75.4542	82.1199	237.517	281.58	237.282	241.87	99.0648	117.741	112.209	137.365	-1.10265	1.10265	-0.124394	0.124394	-1.11903	1.11903	-1.30939	1.30939	0.00289577	1
1663	OG0005530	47.6297	34.8322	74.0904	72.8306	92.4613	95.9806	41.2083	40.0945	72.7278	85.5175	0.10293	-0.10293	-0.224195	0.224195	0.164457	-0.164457	-0.970226	0.970226	0.255089	1
1664	OG0005532	17.919	41.7621	121.957	52.4924	1239.81	1269.9	37.8293	28.351	928.379	901.408	1.45069	-1.45069	-0.0436871	0.0436871	0.521771	-0.521771	0.0536995	-0.0536995	0.085909	1
1665	OG0005533	137.118	205.107	268.084	234.304	427.423	434.463	179.833	148.314	227.881	221.811	0.616864	-0.616864	-0.0749298	0.0749298	0.881199	-0.881199	0.123822	-0.123822	0.0472655	1
1666	OG0005536	75.0083	97.5175	64.7698	61.8785	71.1105	98.3894	27.4456	24.5427	42.4823	49.7071	0.210954	-0.210954	-1.48711	1.48711	0.515952	-0.515952	-0.724153	0.724153	0.293622	1
1667	OG0005537	508.591	592.938	417.527	465.816	217.234	219.414	115.136	127.158	346.09	372.277	-1.03036	1.03036	-0.0940663	0.0940663	-0.935156	0.935156	-0.687072	0.687072	0.00362985	1
1668	OG0005546	44.0239	59.0408	174.717	131.229	367.46	389.742	86.5919	84.9209	246.12	248.268	1.46412	-1.46412	-0.303107	0.303107	0.100353	-0.100353	-0.0447508	0.0447508	0.318588	1
1669	OG0005547	135.923	136.672	165.086	131.579	174.404	150.144	76.4003	72.7818	129.294	138.432	1.68976	-1.68976	1.11831	-1.11831	0.362879	-0.362879	-0.51062	0.51062	0.0960389	1
1670	OG0005549	109.484	148.422	260.346	263.507	134.516	158.963	147.936	152.017	165.542	173.438	-0.0732856	0.0732856	-1.01188	1.01188	-0.165243	0.165243	-0.282923	0.282923	0.0443868	1
1671	OG0005561	183.115	219.855	146.849	98.02	205.06	218.971	112.624	99.3535	220.492	219.673	1.83613	-1.83613	-0.302083	0.302083	0.576446	-0.576446	0.0171351	-0.0171351	0.161453	1
1672	OG0005562	108.178	125.846	178.984	196.238	121.432	133.593	138.954	156.143	187.012	191.615	-0.835546	0.835546	-0.8665	0.8665	-1.05846	1.05846	-0.220918	0.220918	0.00114788	1
1673	OG0005563	2.15034	48.4654	167.77	138.531	200.506	256.433	108.13	122.079	194.864	227.156	0.216983	-0.216983	-0.278218	0.278218	-0.137734	0.137734	-0.173931	0.173931	0.266402	1
1674	OG0005564	169.165	119.12	399.936	538.482	544.073	514.03	487.66	624.674	180.778	378.685	-0.712807	0.712807	0.137086	-0.137086	-0.59471	0.59471	-1.70791	1.70791	0.0363881	1
1675	OG0005573	783.74	998.127	597.148	651.115	255.076	272.912	484.445	594.632	170.158	294.501	-0.290713	0.290713	-0.227155	0.227155	-0.686624	0.686624	-1.79942	1.79942	0.0267	1
1676	OG0005574	369.015	405.101	328.86	417.442	876.526	840.468	232.004	285.31	230.873	284.29	-1.29042	1.29042	0.228317	-0.228317	-1.12028	1.12028	-1.1273	1.1273	0.0163147	1
1677	OG0005575	99.5737	118.759	250.233	239.172	240.274	242.801	101.703	105.999	155.845	165.426	0.489883	-0.489883	-0.113394	0.113394	-0.448361	0.448361	-0.646407	0.646407	0.346749	1
1678	OG0005576	129.514	158.3	139.175	157.999	230.658	241.381	45.0811	48.238	138.305	149.121	-1.02779	1.02779	-0.368594	0.368594	-0.548903	0.548903	-0.610574	0.610574	0.000640597	1
1679	OG0005582	132.8	145.519	81.5168	60.8321	224.536	249.756	56.8683	52.6832	225.115	155.003	1.24287	-1.24287	-0.454806	0.454806	0.326752	-0.326752	1.57762	-1.57762	0.0837556	1
1680	OG0005583	68.8337	85.6237	302.998	322.427	292.333	309.917	182.14	188.831	169.622	200.699	-0.454729	0.454729	-0.427394	0.427394	-0.264004	0.264004	-1.2284	1.2284	0.00806372	1
1681	OG0005585	293.277	311.499	95.5766	92.8177	93.876	99.4001	76.4827	78.8096	109.9	133.891	0.285392	-0.285392	-0.557014	0.557014	-0.292018	0.292018	-1.91786	1.91786	0.109282	1
1682	OG0005586	100.944	124.129	55.6073	60.1403	148.749	141.272	56.0672	63.6047	138.76	193.483	-0.396481	0.396481	0.260992	-0.260992	-0.637644	0.637644	-1.66748	1.66748	0.0745489	1
1683	OG0005587	46.8492	44.6021	80.5673	90.0367	32.8913	102.226	32.3906	32.1605	54.4905	34.4743	-0.208915	0.208915	-1.93144	1.93144	0.0134181	-0.0134181	0.846846	-0.846846	0.467225	1
1684	OG0005594	81.2913	78.2541	105.842	106.549	283.107	269.452	66.2638	68.3387	124.679	122.931	-0.198124	0.198124	1.47015	-1.47015	-0.916983	0.916983	0.419732	-0.419732	0.607485	1
1685	OG0005595	171.021	190.163	224.642	186.852	222.676	227.437	125.356	125.042	148.226	118.124	1.25414	-1.25414	-0.144426	0.144426	0.0171184	-0.0171184	1.54341	-1.54341	0.0693242	1
1686	OG0005596	515.719	138.036	331.43	465.829	166.673	208.405	221.618	269.969	39.9426	31.5346	-0.566794	0.566794	-0.374095	0.374095	-0.330702	0.330702	0.395509	-0.395509	0.192798	1
1687	OG0005599	294.454	363.58	343.124	361.369	189.614	198.44	281.534	328.998	437.06	590.606	-0.272681	0.272681	-0.239481	0.239481	-0.818558	0.818558	-1.57317	1.57317	0.0166104	1
1688	OG0005600	449.844	698.163	633.64	784.256	720.646	691.975	412.659	529.784	240.122	337.26	-0.704755	0.704755	0.134659	-0.134659	-0.824525	0.824525	-1.11619	1.11619	0.0162585	1
1689	OG0005602	166.643	167.189	327.325	340.505	81.1535	125.839	253.595	278.328	344.25	380.553	-0.184195	0.184195	-2.01471	2.01471	-0.433932	0.433932	-0.467441	0.467441	0.0394707	1
1690	OG0005606	88.3563	110.892	255.13	259.16	163.515	135.469	144.312	150.218	235.497	199.363	-0.0976718	0.0976718	1.16932	-1.16932	-0.249954	0.249954	1.03581	-1.03581	0.126904	1
1691	OG0005607	35.0132	81.7494	244.704	162.692	129.545	121.725	26.2901	17.7712	140.145	136.561	0.873044	-0.873044	0.134979	-0.134979	0.838492	-0.838492	0.0561811	-0.0561811	0.0223485	1
1692	OG0005610	883.952	621.1	252.128	245.776	130.272	60.1152	212.142	222.542	290.678	200.966	0.0604716	-0.0604716	1.74652	-1.74652	-0.113395	0.113395	0.864852	-0.864852	0.0779579	1
1693	OG0005612	290.632	565.371	319.426	524.231	120.873	101.534	524.168	763.045	90.0486	234.104	-0.812774	0.812774	0.29112	-0.29112	-0.621325	0.621325	-1.48791	1.48791	0.0443442	1
1694	OG0005616	116.149	138.601	173.299	137.315	104.873	131.286	108.295	122.501	301.07	244.262	1.11778	-1.11778	-1.07911	1.07911	-0.593903	0.593903	1.00511	-1.00511	0.784911	1
1695	OG0005622	633.639	852.798	345.493	503.541	324.836	267.738	245.28	310.291	106.203	224.216	-0.868075	0.868075	0.449343	-0.449343	-0.545678	0.545678	-1.66555	1.66555	0.0777706	1
1696	OG0005623	130.279	193.244	164.767	240.733	141.101	151.627	176.289	227.549	178.472	284.349	-1.05198	1.05198	-0.201917	0.201917	-0.71276	0.71276	-1.28459	1.28459	0.00273723	1
1697	OG0005624	243.373	209.017	206.633	261.523	257.911	248.528	104.548	133.141	82.6534	151.524	-0.715552	0.715552	0.113071	-0.113071	-0.734152	0.734152	-1.79483	1.79483	0.0298694	1
1698	OG0005625	95.0409	136.487	569.343	645.029	176.729	163.8	292.414	335.768	136.682	168.363	-0.574731	0.574731	0.350104	-0.350104	-0.636428	0.636428	-0.957691	0.957691	0.0621479	1
1699	OG0005626	502.334	706.406	452.758	538.129	95.5649	153.179	285.328	267.853	249.588	338.067	-0.54311	0.54311	-1.46009	1.46009	0.199141	-0.199141	-0.949121	0.949121	0.0320418	1
1700	OG0005628	114.735	121.002	236.961	172.078	624.357	635.842	137.636	130.649	512.63	508.511	2.06138	-2.06138	-0.118435	0.118435	0.338454	-0.338454	0.0524101	-0.0524101	0.151059	1
1701	OG0005629	674.613	889.257	336.96	531.357	207.947	245.619	606.257	681.805	390.421	419.573	-1.67289	1.67289	-0.62064	0.62064	-0.438268	0.438268	-0.268929	0.268929	0.0152482	1
1702	OG0005631	68.4427	68.1809	76.46	87.2539	84.2701	88.7405	30.2469	30.0426	38.0955	57.727	-0.645114	0.645114	-0.252823	0.252823	0.0331611	-0.0331611	-2.00461	2.00461	0.0655155	1
1703	OG0005633	65.2737	109.569	911.36	847.527	1171.25	1328.3	805.836	852.572	401.042	455.381	0.282501	-0.282501	-0.489063	0.489063	-0.219363	0.219363	-0.493889	0.493889	0.124982	1
1704	OG0005635	424.194	476.031	486.72	460.438	663.371	616.284	361.563	423.417	220.952	357.84	0.226418	-0.226418	0.300256	-0.300256	-0.642972	0.642972	-1.92987	1.92987	0.212799	1
1705	OG0005636	53.5996	21.9901	78.3557	83.781	100.694	116.616	41.1259	46.1233	51.4867	56.3881	-0.164277	0.164277	-0.359713	0.359713	-0.281201	0.281201	-0.223068	0.223068	0.000126215	0.24473
1706	OG0005637	674.067	784.225	324.325	347.981	544.541	562.123	192.196	201.42	208.948	212.992	-0.843131	0.843131	-0.380683	0.380683	-0.561554	0.561554	-0.229647	0.229647	0.00166259	1
1707	OG0005638	230.763	297.034	162.241	223.178	220.475	201.997	186.591	225.328	571.172	588.975	-1.47427	1.47427	0.407829	-0.407829	-0.876898	0.876898	-0.143091	0.143091	0.123877	1
1708	OG0005639	55.3712	87.9004	313.265	376.312	1023.03	1038.03	130.794	149.372	281.905	399.53	-0.632072	0.632072	-0.0502935	0.0502935	-0.458414	0.458414	-1.19334	1.19334	0.0131182	1
1709	OG0005640	292.03	329.506	78.3541	73.5259	167.601	166.278	85.2188	81.6669	115.21	103.957	0.765975	-0.765975	0.0955371	-0.0955371	0.512832	-0.512832	1.23713	-1.23713	0.00830254	1
1710	OG0005641	106.19	116.539	66.5076	64.1381	141.282	143.393	52.8291	61.0394	151.92	147.248	0.430525	-0.430525	-0.175991	0.175991	-1.71158	1.71158	0.370746	-0.370746	0.47072	1
1711	OG0005642	190.294	239.574	298.731	471.563	723.096	566.781	610.049	887.555	403.113	462.324	-1.39038	1.39038	0.750959	-0.750959	-1.14826	1.14826	-0.423966	0.423966	0.154911	1
1712	OG0005644	282.83	340.276	151.181	147.568	196.755	203.445	96.5107	107.269	102.285	117.782	0.19868	-0.19868	-0.27463	0.27463	-0.867349	0.867349	-1.15693	1.15693	0.0498399	1
1713	OG0005645	338.922	456.096	435.854	521.274	875.254	921.823	457.164	496.674	403.351	503.749	-0.89924	0.89924	-0.261105	0.261105	-0.417364	0.417364	-1.1152	1.1152	0.00315268	1
1714	OG0005647	58.6379	44.4366	542.487	430.547	622.392	686.122	245.934	275.575	581.594	618.939	1.23913	-1.23913	-0.5246	0.5246	-0.612209	0.612209	-0.335053	0.335053	0.856623	1
1715	OG0005652	60.2155	38.654	143.443	123.933	171.781	121.543	40.6306	37.9777	301.527	207.912	0.452303	-0.452303	1.0616	-1.0616	0.209185	-0.209185	1.13903	-1.13903	0.00440078	1
1716	OG0005653	458.697	556.143	554.81	505.107	847.641	835.464	205.471	221.541	290.911	361.047	0.636038	-0.636038	0.0981342	-0.0981342	-0.510466	0.510466	-1.45912	1.45912	0.368501	1
1717	OG0005654	229.035	315.835	138.903	184.834	46.3483	93.2971	299.815	338.269	311.691	409.952	-0.707997	0.707997	-1.67769	1.67769	-0.300737	0.300737	-0.67948	0.67948	0.00672103	1
1718	OG0005655	168.05	248.117	409.585	440.043	260.001	240.436	360.984	445.047	383.442	645.31	-0.223758	0.223758	0.244023	-0.244023	-0.650978	0.650978	-1.58886	1.58886	0.0909556	1
1719	OG0005657	220.839	305.098	309.947	366.23	238.138	235.262	143.9	187.88	87.502	192.147	-0.404838	0.404838	0.0295489	-0.0295489	-0.644723	0.644723	-1.82	1.82	0.0441271	1
1720	OG0005778	287.482	351.635	404.257	492.247	434.707	424.902	324.971	362.32	174.542	302.518	-0.676372	0.676372	0.0786044	-0.0786044	-0.374498	0.374498	-1.84868	1.84868	0.0516065	1
1721	OG0005787	75.8391	88.929	139.489	128.276	111.019	102.114	26.5382	28.4579	48.4852	54.7847	0.731422	-0.731422	0.729775	-0.729775	-0.609702	0.609702	-1.06546	1.06546	0.875351	1
1722	OG0005788	77.0716	117.362	83.5689	77.3498	116.592	142.824	36.0161	33.5346	50.5632	71.8882	0.279138	-0.279138	-0.730352	0.730352	0.257695	-0.257695	-1.25785	1.25785	0.225668	1
1723	OG0005791	381.848	442.77	238.228	270.284	428.437	431.941	316.067	325.191	250.962	331.111	-0.790575	0.790575	-0.0510777	0.0510777	-0.178433	0.178433	-1.72687	1.72687	0.044111	1
1724	OG0005800	182.223	256.071	157.975	181.638	84.7874	89.2679	75.9058	88.0152	88.6564	154.199	-0.441251	0.441251	-0.163021	0.163021	-0.467842	0.467842	-1.70917	1.70917	0.0291431	1
1725	OG0005807	137.075	159.9	120.06	159.911	198.188	159.603	116.289	131.282	81.9631	132.552	-0.969097	0.969097	0.73422	-0.73422	-0.412318	0.412318	-1.6056	1.6056	0.159749	1
1726	OG0005811	81.4349	102.337	82.3051	123.757	125.479	146.51	61.3188	73.3107	99.0507	142.176	-1.35435	1.35435	-0.520583	0.520583	-0.599698	0.599698	-1.20362	1.20362	0.00082491	1
1727	OG0005819	410.612	474.399	423.531	376.487	795.344	792.743	164.338	171.587	430.38	416.123	1.28629	-1.28629	0.0358316	-0.0358316	-0.472046	0.472046	0.368414	-0.368414	0.288543	1
1728	OG0005833	108.813	121.141	179.144	166.516	162.423	499.959	203.734	215.173	292.758	334.32	0.14942	-0.14942	-2.08414	2.08414	-0.111681	0.111681	-0.271075	0.271075	0.158598	1
1729	OG0005835	100.038	120.06	280.246	310.609	279.236	274.209	333.042	346.559	320.924	326.837	-1.01751	1.01751	0.179851	-0.179851	-0.393833	0.393833	-0.18077	0.18077	0.09395	1
1730	OG0005838	105.131	105.173	201.259	220.666	213.013	209.968	314.665	318.316	184.235	237.84	-0.720683	0.720683	0.112806	-0.112806	-0.0903575	0.0903575	-1.9899	1.9899	0.0916551	1
1731	OG0005854	186.475	281.627	285.619	335.463	233.001	240.771	220.465	268.805	375.451	403.202	-0.700514	0.700514	-0.143159	0.143159	-0.862414	0.862414	-0.31109	0.31109	0.00525375	1
1732	OG0005860	23.3086	40.3339	338.384	334.248	137.271	142.475	59.9153	56.8068	232.5	200.426	0.0466649	-0.0466649	-0.141183	0.141183	0.202088	-0.202088	0.562199	-0.562199	0.163409	1
1733	OG0005880	144.267	188.334	129.698	161.821	169.758	91.8799	96.3451	112.557	112.44	121.595	-0.658922	0.658922	1.7799	-1.7799	-0.464053	0.464053	-0.233934	0.233934	0.800025	1
1734	OG0005901	605.178	611.19	449.283	472.258	131.945	154.854	217.826	231.253	433.599	412.088	-0.571376	0.571376	-1.83068	1.83068	-0.685187	0.685187	0.582954	-0.582954	0.122782	1
1735	OG0005909	214.73	260.061	83.7284	109.156	243.298	296.511	83.7362	92.2478	89.8131	115.716	-1.19862	1.19862	-0.896291	0.896291	-0.439748	0.439748	-1.14588	1.14588	0.000287522	0.553479
1736	OG0005917	82.7223	85.8513	78.8296	110.199	120.762	117.489	98.9824	122.396	96.7396	108.768	-1.70393	1.70393	0.141022	-0.141022	-1.08594	1.08594	-0.600951	0.600951	0.0256939	1
1737	OG0005922	19.1789	38.9445	340.912	600.532	233.852	211.498	372.278	518.783	85.6572	222.88	-0.903688	0.903688	0.164487	-0.164487	-0.538791	0.538791	-1.45745	1.45745	0.0294055	1
1738	OG0005935	301.463	407.997	325.745	391.955	131.529	127.932	307.819	348.655	224.884	366.921	-0.642674	0.642674	0.0965736	-0.0965736	-0.433352	0.433352	-1.67199	1.67199	0.0447123	1
1739	OG0005936	367.45	490.619	200.628	211.011	254.406	265.439	66.9223	62.0973	143.835	163.555	-0.324383	0.324383	-0.272949	0.272949	0.480981	-0.480981	-0.825086	0.825086	0.262656	1
1740	OG0005937	199.438	247.889	141.07	162.692	153.539	208.174	80.2747	91.7178	110.359	129.882	-0.670959	0.670959	-1.42381	1.42381	-0.62716	0.62716	-0.76603	0.76603	0.000571154	1
1741	OG0005947	32.5865	42.4032	94.1532	104.288	132.152	164.11	51.0159	56.2789	99.0484	85.5175	-0.547456	0.547456	-1.15633	1.15633	-0.525811	0.525811	0.785862	-0.785862	0.258776	1
1742	OG0005954	44.311	56.0619	244.072	177.464	171.481	232.847	80.9571	96.1598	189.092	153.13	1.1842	-1.1842	-1.13746	1.13746	-0.643279	0.643279	0.787553	-0.787553	0.907429	1
1743	OG0005955	192.157	217.002	109.633	117.845	82.1363	74.3345	72.9388	76.9065	71.3425	90.8624	-0.50875	0.50875	0.702662	-0.702662	-0.373145	0.373145	-1.69588	1.69588	0.225358	1
1744	OG0005961	249.61	272.012	284.67	264.899	160.848	170.612	187.828	196.872	208.027	263.231	0.564425	-0.564425	-0.462143	0.462143	-0.368846	0.368846	-1.83788	1.83788	0.18341	1
1745	OG0005978	273.212	253.351	90.6762	78.9107	91.0698	107.851	52.8283	45.4886	76.6528	88.9944	0.940682	-0.940682	-1.14388	1.14388	1.01221	-1.01221	-1.01021	1.01021	0.908528	1
1746	OG0005984	62.262	77.6652	2491.42	3933.63	291.635	257.548	1161.17	1684.13	800.927	2746.18	-0.752051	0.752051	0.207955	-0.207955	-0.615802	0.615802	-1.83737	1.83737	0.045145	1
1747	OG0005992	431.995	559.156	196.204	237.606	283.082	269.221	147.856	199.727	107.36	148.854	-0.740771	0.740771	0.194789	-0.194789	-1.15831	1.15831	-1.257	1.257	0.0195299	1
1748	OG0006004	61.4404	190.297	263.819	252.381	412.171	335.994	46.9767	72.5702	139.684	333.518	0.0673896	-0.0673896	0.309669	-0.309669	-0.651118	0.651118	-1.24581	1.24581	0.179221	1
1749	OG0006014	249.638	314.889	125.592	166.691	218.292	217.81	62.2246	62.4146	126.292	129.075	-1.63572	1.63572	0.0128743	-0.0128743	-0.0177361	0.0177361	-0.126769	0.126769	0.168457	1
1750	OG0006031	97.6097	99.9807	42.6533	52.1448	274.244	268.927	190.877	235.905	149.15	210.854	-0.942587	0.942587	0.0921537	-0.0921537	-0.993262	0.993262	-1.6136	1.6136	0.0134931	1
1751	OG0006034	194.349	257.263	113.271	115.416	302.844	288.51	65.8517	72.5713	256.281	297.443	-0.118936	0.118936	0.30748	-0.30748	-0.615786	0.615786	-0.942979	0.942979	0.128643	1
1752	OG0006038	80.1657	96.7081	86.2513	101.091	116.362	99.7709	46.0717	56.8079	72.4993	109.839	-0.618799	0.618799	0.599665	-0.599665	-0.81521	0.81521	-1.59973	1.59973	0.107489	1
1753	OG0006040	70.2953	87.6294	101.894	108.637	95.0218	103.234	56.209	64.3188	81.5037	102.624	-0.377016	0.377016	-0.487635	0.487635	-0.79207	0.79207	-1.35026	1.35026	0.00277219	1
1754	OG0006046	53.5293	139.009	167.612	169.816	92.9941	111.235	152.142	170.001	126.523	172.104	-0.0288084	0.0288084	-0.393798	0.393798	-0.244418	0.244418	-0.672959	0.672959	0.0127975	1
1755	OG0006057	153.192	131.948	459.676	485.341	315.732	367.039	492.851	536.236	325.867	389.313	-0.392153	0.392153	-1.08506	1.08506	-0.608756	0.608756	-1.281	1.281	0.00116972	1
1756	OG0006061	1673.57	1239.23	421.478	470.692	485.059	481.271	351.919	333.76	606.984	541.695	-0.684482	0.684482	0.0486424	-0.0486424	0.32863	-0.32863	0.705284	-0.705284	0.649007	1
1757	OG0006073	173.644	215.806	89.7299	102.899	349.969	416.953	48.0489	47.0754	117.519	122.667	-0.924896	0.924896	-1.18163	1.18163	0.13845	-0.13845	-0.289965	0.289965	0.0374827	1
1758	OG0006076	104.988	112.784	93.5213	90.2122	151.307	195.024	92.6355	97.3266	83.3461	90.0607	0.272559	-0.272559	-1.91027	1.91027	-0.373721	0.373721	-0.585993	0.585993	0.091912	1
1759	OG0006077	179.454	178.652	324.167	322.429	214.702	261.596	171.262	161.961	176.394	198.027	0.0485001	-0.0485001	-1.77641	1.77641	0.50363	-0.50363	-1.04246	1.04246	0.172451	1
1760	OG0006079	35.4317	41.7689	92.5735	76.4773	81.6346	77.1855	30.8238	32.7941	46.6382	30.7329	0.82591	-0.82591	0.242993	-0.242993	-0.268644	0.268644	1.78316	-1.78316	0.0832768	1
1761	OG0006094	80.2329	80.1074	96.5228	116.457	92.2543	65.8667	51.6761	50.4617	59.7984	80.4373	-0.821504	0.821504	1.46477	-1.46477	0.104358	-0.104358	-1.29176	1.29176	0.762143	1
1762	OG0006104	245.925	244.053	138.701	120.804	117.94	102.735	98.8192	104.409	368.49	408.344	1.28772	-1.28772	1.28658	-1.28658	-0.51358	0.51358	-0.957926	0.957926	0.533895	1
1763	OG0006107	266.349	320.796	312.791	375.439	268.099	380.14	176.537	211.573	66.9581	111.71	-0.562978	0.562978	-1.06896	1.06896	-0.558318	0.558318	-1.54911	1.54911	0.0014159	1
1764	OG0006124	743.207	977.192	483.297	520.49	187.074	204.293	291.53	348.774	56.102	138.969	-0.171418	0.171418	-0.203543	0.203543	-0.413594	0.413594	-1.96526	1.96526	0.0636991	1
1765	OG0006163	67.8441	52.3162	93.0158	92.9881	157.564	132.184	114.692	124.69	58.7064	71.5862	0.00166953	-0.00166953	0.980842	-0.980842	-0.467673	0.467673	-1.10693	1.10693	0.65074	1
1766	OG0006170	233.971	248.447	369.349	386.214	149.471	108.233	193.103	231.463	691.722	814.825	-0.23147	0.23147	1.65942	-1.65942	-0.936956	0.936956	-0.847363	0.847363	0.841549	1
1767	OG0006172	82.6933	80.6157	81.3588	99.7686	81.9294	81.9591	123.955	145.353	65.5705	102.888	-0.840038	0.840038	-0.00149631	0.00149631	-0.656671	0.656671	-1.83086	1.83086	0.020837	1
1768	OG0006173	586.233	654.85	74.5643	71.9598	73.3969	82.9973	45.8237	47.9217	64.1852	75.3597	0.318063	-0.318063	-1.09843	1.09843	-0.40047	0.40047	-1.43289	1.43289	0.0549792	1
1769	OG0006182	2208.99	2325.74	419.266	363.969	670.162	536.665	1283.97	1280.24	520.103	597.148	0.995329	-0.995329	1.5595	-1.5595	0.0204995	-0.0204995	-0.972177	0.972177	0.3483	1
1770	OG0006185	180.515	224.165	234.595	218.659	207.828	205.417	185.024	160.269	129.292	166.495	0.405299	-0.405299	0.0672502	-0.0672502	0.82643	-0.82643	-1.4499	1.4499	0.917785	1
1771	OG0006194	243.785	328.251	177.564	193.285	164.839	198.721	132.938	140.062	186.091	200.966	-0.484549	0.484549	-1.06523	1.06523	-0.298254	0.298254	-0.439286	0.439286	0.00306287	1
1772	OG0006205	25.3871	75.2873	79.3035	72.8289	56.2128	159.903	38.7358	45.0655	66.494	92.4658	0.126409	-0.126409	-1.42506	1.42506	-0.224343	0.224343	-0.485288	0.485288	0.07643	1
1773	OG0006216	104.873	150.366	51.8159	65.3548	92.1483	83.857	44.1753	49.8249	56.3375	67.0752	-1.01325	1.01325	0.413093	-0.413093	-0.527029	0.527029	-0.762958	0.762958	0.0755584	1
1774	OG0006219	70.7152	67.7355	88.0254	73.5276	83.9468	78.4681	28.845	30.7842	78.2667	81.7762	1.79938	-1.79938	0.676376	-0.676376	-0.652066	0.652066	-0.439686	0.439686	0.41998	1
1775	OG0006220	161.993	211.703	72.8266	75.0902	153.306	156.667	45.8245	45.1702	45.7146	63.0692	-0.155565	0.155565	-0.110213	0.110213	0.0730922	-0.0730922	-1.62168	1.62168	0.153296	1
1776	OG0006232	83.2202	104.606	105.684	134.012	170.961	147.765	99.0648	115.307	132.759	152.328	-1.21353	1.21353	0.747279	-0.747279	-0.777993	0.777993	-0.704815	0.704815	0.157333	1
1777	OG0006246	57.7292	79.2411	138.385	145.138	120.904	135.84	52.9115	56.3847	66.4917	77.5003	-0.268282	0.268282	-0.655213	0.655213	-0.357921	0.357921	-0.861096	0.861096	0.00144186	1
1778	OG0006252	49.7693	66.6043	83.2545	93.1654	74.1547	91.5585	73.2684	88.2268	101.588	119.727	-0.530775	0.530775	-0.992281	0.992281	-0.875128	0.875128	-0.774378	0.774378	2.69058e-05	0.0526546
1779	OG0006264	1770.89	1951.11	56.2392	42.4111	72.4994	76.9767	32.3073	28.5616	78.964	59.3305	1.37403	-1.37403	-0.293617	0.293617	0.603225	-0.603225	1.39164	-1.39164	0.0344124	1
1780	OG0006266	688.638	903.861	290.992	317.388	57.4052	76.0868	144.969	192.111	158.618	228.987	-0.30303	0.30303	-0.977422	0.977422	-0.976777	0.976777	-1.26797	1.26797	0.000890359	1
1781	OG0006268	228.562	256.812	176.774	212.228	201.098	187.797	99.5593	117.424	135.523	177.983	-0.991982	0.991982	0.372251	-0.372251	-0.896127	0.896127	-1.47413	1.47413	0.0364182	1
1782	OG0006269	779.344	1000.82	210.581	178.853	191.42	134.538	156.18	183.118	272.443	326.038	0.668228	-0.668228	1.43131	-1.43131	-0.651197	0.651197	-0.734504	0.734504	0.648897	1
1783	OG0006289	368.948	446.816	251.179	251.338	390.588	170.161	218.488	234.103	221.418	231.437	-0.00164976	0.00164976	2.05091	-2.05091	-0.180009	0.180009	-0.11543	0.11543	0.293548	1
1784	OG0006293	556.832	604.726	109.161	92.2963	120.014	124.988	45.3283	39.5656	95.2642	100.662	1.4754	-1.4754	-0.35777	0.35777	1.19638	-1.19638	-0.48557	0.48557	0.252936	1
1785	OG0006295	88.2875	94.3021	107.739	99.5948	96.2167	63.1173	52.2513	57.3358	103.666	117.317	0.366294	-0.366294	1.93713	-1.93713	-0.432643	0.432643	-0.576029	0.576029	0.457327	1
1786	OG0006299	34.0602	55.8492	72.5122	81	130.468	142.198	28.6818	30.4657	2836.39	1904.37	-0.365109	0.365109	-0.284067	0.284067	-0.199163	0.199163	1.29822	-1.29822	0.702345	1
1787	OG0006306	69.8921	74.9236	179.461	160.258	261.902	225.668	153.377	173.703	231.575	198.029	0.850362	-0.850362	1.11798	-1.11798	-0.934853	0.934853	1.17468	-1.17468	0.169923	1
1788	OG0006307	685.571	910.283	236.805	269.241	91.3	105.456	181.069	204.064	137.142	201.233	-0.519314	0.519314	-0.58293	0.58293	-0.483734	0.483734	-1.5346	1.5346	0.0047059	1
1789	OG0006318	137.371	159.636	156.715	132.1	388.485	390.338	70.4679	65.4835	200.406	201.768	1.51481	-1.51481	-0.0422943	0.0422943	0.651652	-0.651652	-0.0602108	0.0602108	0.0974076	1
1790	OG0006319	190.031	247.597	152.29	172.252	156.79	150.169	39.8897	40.1982	55.4555	97.1078	-0.42089	0.42089	0.147611	-0.147611	-0.0263606	0.0263606	-1.8682	1.8682	0.145112	1
1791	OG0006333	420.89	423.555	172.035	204.06	85.3616	116.682	187.827	219.615	220.031	325.237	-0.661321	0.661321	-1.20393	1.20393	-0.605926	0.605926	-1.49848	1.49848	0.00063237	1
1792	OG0006338	97.4753	110.072	71.0888	78.9142	85.9953	128.525	51.2632	52.1543	80.1161	98.8797	-0.464448	0.464448	-1.76506	1.76506	-0.0767146	0.0767146	-0.93327	0.93327	0.0197651	1
1793	OG0006340	255.922	302.65	135.228	171.73	138.228	132.741	47.0591	53.848	100.203	87.121	-1.43382	1.43382	0.244129	-0.244129	-0.811215	0.811215	0.842044	-0.842044	0.454158	1
1794	OG0006341	102.21	99.7732	104.265	130.364	87.1462	112.444	169.614	191.052	100.662	137.627	-0.995514	0.995514	-1.13437	1.13437	-0.531973	0.531973	-1.38835	1.38835	0.000207654	0.401188
1795	OG0006345	1106.64	886.83	128.116	127.753	177.086	206.903	62.307	65.3767	126.062	166.492	0.0154787	-0.0154787	-0.846488	0.846488	-0.262078	0.262078	-1.50653	1.50653	0.0344343	1
1796	OG0006347	570.545	734.041	75.8281	70.5675	170.894	170.974	58.3502	63.5772	128.142	163.288	0.417226	-0.417226	-0.00273048	0.00273048	-0.497764	0.497764	-1.40026	1.40026	0.22807	1
1797	OG0006348	272.343	347.306	88.3066	81.5197	141.905	133.782	193.926	212.314	260.174	300.974	0.542324	-0.542324	0.399855	-0.399855	-0.61425	0.61425	-0.986673	0.986673	0.558393	1
1798	OG0006349	258.398	282.185	132.383	142.703	254.848	238.258	67.0048	70.9834	135.066	139.77	-1.06344	1.06344	0.953736	-0.953736	-0.817354	0.817354	-0.485232	0.485232	0.311048	1
1799	OG0006352	20.6008	47.3515	57.9785	52.3186	110.276	90.8279	49.9437	51.8359	52.1793	66.5407	0.255202	-0.255202	0.480956	-0.480956	-0.0924585	0.0924585	-0.601607	0.601607	0.9517	1
1800	OG0006353	8.81211	216.153	160.977	152.958	101.669	62.6531	106.812	109.172	166.468	132.817	0.0565138	-0.0565138	0.525334	-0.525334	-0.0241721	0.0241721	0.248777	-0.248777	0.0583062	1
1801	OG0006354	169.956	238.377	100.156	123.581	153.937	159.82	91.1528	90.2367	80.3469	96.7417	-1.01389	1.01389	-0.181567	0.181567	0.0489079	-0.0489079	-0.896523	0.896523	0.0329713	1
1802	OG0006363	63.099	94.6629	359.553	393.865	84.6245	110.884	74.9168	73.9455	96.511	105.029	-0.388078	0.388078	-1.14453	1.14453	0.0555999	-0.0555999	-0.360147	0.360147	0.0407231	1
1803	OG0006364	261.457	310.178	196.837	258.292	151.835	151.336	222.855	253.044	167.858	182.794	-1.61806	1.61806	0.0197132	-0.0197132	-0.760161	0.760161	-0.510408	0.510408	0.0249426	1
1804	OG0006371	593.252	850.514	274.087	378.747	604.033	508.545	147.279	179.838	262.282	533.148	-0.778799	0.778799	0.416936	-0.416936	-0.483524	0.483524	-1.65425	1.65425	0.083963	1
1805	OG0006383	53.508	53.8655	131.119	145.833	159.703	170.612	95.9338	106.845	75.727	99.3821	-0.711809	0.711809	-0.442493	0.442493	-0.720947	0.720947	-1.80991	1.80991	0.00510587	1
1806	OG0006386	100.763	125.535	145.969	134.012	72.2434	81.5581	79.6969	85.5821	108.745	101.018	0.639007	-0.639007	-0.906199	0.906199	-0.532788	0.532788	0.551241	-0.551241	0.827995	1
1807	OG0006399	113.467	126.266	75.1978	88.3002	70.1975	94.3244	53.2403	54.6921	120.747	120.526	-0.966152	0.966152	-1.768	1.768	-0.162165	0.162165	0.0110119	-0.0110119	0.0467823	1
1808	OG0006402	47.6953	72.8305	93.9952	112.633	85.6513	99.878	61.6477	64.5304	49.1779	53.1812	-0.784027	0.784027	-0.666541	0.666541	-0.198586	0.198586	-0.339962	0.339962	0.00214082	1
1809	OG0006406	164.849	165.349	140.122	133.84	89.8878	134.647	179.339	181.529	357.634	313.74	0.2304	-0.2304	-2.00286	2.00286	-0.0609663	0.0609663	0.656887	-0.656887	0.506068	1
1810	OG0006411	182.291	243.243	280.878	307.307	201.763	187.21	74.1758	89.9204	193.248	218.337	-0.496482	0.496482	0.413412	-0.413412	-1.06018	1.06018	-0.673546	0.673546	0.0853824	1
1811	OG0006414	61.6863	82.8043	196.521	196.586	73.2831	138.638	78.7079	86.4294	202.253	197.759	-0.00101318	0.00101318	-1.89819	1.89819	-0.2878	0.2878	0.0691396	-0.0691396	0.15675	1
1812	OG0006418	10.7731	56.3112	76.4363	79.705	161.11	193.137	80.5219	91.082	85.4263	86.8404	-0.0645533	0.0645533	-0.278785	0.278785	-0.189756	0.189756	-0.0253116	0.0253116	0.0145869	1
1813	OG0006427	452.144	498.846	38.7039	54.5782	79.1568	79.4569	49.5316	50.778	52.1793	84.4513	-1.22165	1.22165	-0.0135835	0.0135835	-0.0892007	0.0892007	-1.69562	1.69562	0.0431904	1
1814	OG0006431	35.7096	47.05	281.986	300.703	741.286	628.028	166.613	193.365	531.724	630.959	-0.34305	0.34305	0.883301	-0.883301	-0.793642	0.793642	-0.911486	0.911486	0.354149	1
1815	OG0006433	24.7212	39.2624	175.482	196.586	100.13	111.304	66.5103	61.251	51.4867	58.2588	-0.478763	0.478763	-0.446084	0.446084	0.347464	-0.347464	-0.520859	0.520859	0.111045	1
1816	OG0006437	20.3977	44.6838	114.376	97.1614	135	116.893	120.248	127.897	78.0404	81.2417	0.442203	-0.442203	0.390604	-0.390604	-0.167513	0.167513	-0.109212	0.109212	0.267657	1
1817	OG0006441	162.76	181.921	135.543	107.418	154.532	151.124	66.8399	67.1751	98.3557	116.518	1.59289	-1.59289	0.15342	-0.15342	-0.034412	0.034412	-1.1631	1.1631	0.743283	1
1818	OG0006445	708.509	727.178	552.916	536.045	346.063	442.727	413.897	516.03	608.254	574.314	0.195321	-0.195321	-1.54495	1.54495	-1.38462	1.38462	0.361818	-0.361818	0.148104	1
1819	OG0006446	88.1012	107.546	73.9324	77.694	80.1681	99.5265	59.1735	55.5585	116.595	125.072	-0.337448	0.337448	-1.46535	1.46535	0.428578	-0.428578	-0.477106	0.477106	0.143412	1
1820	OG0006461	352.212	437.313	213.897	216.749	312.303	347.964	170.767	179.413	165.314	214.59	-0.0785098	0.0785098	-0.640349	0.640349	-0.292763	0.292763	-1.53783	1.53783	0.0310878	1
1821	OG0006462	236.181	269.085	189.412	174.164	116.574	74.4086	75.9058	63.0493	174.547	154.466	0.343644	-0.343644	1.80899	-1.80899	0.758083	-0.758083	0.500078	-0.500078	0.0106545	1
1822	OG0006463	115.153	149.779	157.975	169.818	20.0912	108.64	59.4224	68.8677	94.6616	116.25	-0.107592	0.107592	-2.0484	2.0484	-0.219249	0.219249	-0.30482	0.30482	0.0857214	1
1823	OG0006470	465.464	936.586	59.7162	63.7905	95.0218	101.738	64.5116	64.6288	46.4073	62.0002	-0.189857	0.189857	-0.196438	0.196438	-0.00521896	0.00521896	-0.827823	0.827823	0.0535365	1
1824	OG0006475	127.791	154.102	135.701	138.881	114.285	87.1667	56.9499	53.4227	54.719	56.6554	-0.146062	0.146062	1.69777	-1.69777	0.403047	-0.403047	-0.21927	0.21927	0.215868	1
1825	OG0006478	678.688	833.042	417.686	424.283	747.064	816.963	297.772	350.684	505.403	519.786	-0.119513	0.119513	-0.681735	0.681735	-1.2447	1.2447	-0.214016	0.214016	0.0211198	1
1826	OG0006482	143.712	147.54	266.98	241.948	280.128	294.641	85.3021	87.4863	154.689	169.429	1.41234	-1.41234	-0.725054	0.725054	-0.362982	0.362982	-1.30592	1.30592	0.575128	1
1827	OG0006492	200.876	380.9	395.726	404.817	183.14	181.554	158.734	167.25	201.558	288.619	-0.0672999	0.0672999	0.0257764	-0.0257764	-0.154825	0.154825	-1.05258	1.05258	0.127188	1
1828	OG0006507	156.727	187.787	251.497	196.932	189.206	243.867	202.992	199.833	355.094	300.648	1.20586	-1.20586	-1.25082	1.25082	0.0777326	-0.0777326	0.822837	-0.822837	0.596628	1
1829	OG0006510	242.125	318.31	67.1395	70.7414	113.61	115.468	105.328	121.021	41.7896	59.0606	-0.239893	0.239893	-0.0744656	0.0744656	-0.636683	0.636683	-1.57264	1.57264	0.0374852	1
1830	OG0006520	453.77	418.564	235.541	200.93	435.912	356.841	285.655	391.308	136.989	142.592	0.814778	-0.814778	1.02484	-1.02484	-1.60359	1.60359	-0.205924	0.205924	0.986434	1
1831	OG0006522	64.4842	69.2876	327.009	396.996	361.613	277.82	110.85	117.318	154.922	161.949	-1.20207	1.20207	1.62952	-1.62952	-0.352501	0.352501	-0.275767	0.275767	0.90936	1
1832	OG0006531	377.774	406.977	105.213	118.37	208.51	230.518	94.4495	98.6997	188.402	150.188	-0.870119	0.870119	-0.741194	0.741194	-0.325364	0.325364	1.6688	-1.6688	0.877768	1
1833	OG0006550	386.793	457.644	177.564	221.266	206.979	218.708	132.195	146.303	128.37	142.173	-1.47085	1.47085	-0.369833	0.369833	-0.680005	0.680005	-0.684824	0.684824	0.00293264	1
1834	OG0006551	205.791	245.18	249.759	306.092	414.735	373.329	84.6427	104.625	168.315	246.662	-0.827782	0.827782	0.429155	-0.429155	-0.862339	0.862339	-1.54209	1.54209	0.052472	1
1835	OG0006554	278.597	465.812	490.515	609.227	572.945	517.864	228.871	314.718	142.916	433.467	-0.383512	0.383512	0.179402	-0.179402	-0.561084	0.561084	-1.79096	1.79096	0.0723678	1
1836	OG0006555	33.6403	35.121	43.6012	29.5487	178.63	193.398	53.9005	43.6902	137.375	151.259	1.78358	-1.78358	-0.368551	0.368551	0.971368	-0.971368	-0.446616	0.446616	0.252314	1
1837	OG0006556	76.8272	61.5409	406.47	356.323	371.376	554.386	228.954	261.293	374.948	477.025	0.511583	-0.511583	-1.53833	1.53833	-0.513325	0.513325	-0.932345	0.932345	0.0890934	1
1838	OG0006558	32.2047	57.0433	100.155	116.109	78.655	73.0518	61.2356	63.0493	59.5652	82.5752	-0.470396	0.470396	0.235506	-0.235506	-0.0930528	0.0930528	-1.03221	1.03221	0.127577	1
1839	OG0006560	151.487	157.049	197.472	225.962	371.469	393.824	418.514	397.02	164.954	143.164	-1.33675	1.33675	-0.580334	0.580334	0.523593	-0.523593	1.40496	-1.40496	0.994857	1
1840	OG0006562	142.154	154.214	106.949	97.6846	196.729	211.105	89.5053	107.269	123.755	136.828	0.768599	-0.768599	-0.598402	0.598402	-1.53251	1.53251	-0.851683	0.851683	0.156091	1
1841	OG0006563	207.885	314.659	670.917	751.928	312.463	396.384	162.855	229.135	198.328	229.291	-0.39638	0.39638	-0.824223	0.824223	-1.17717	1.17717	-0.504107	0.504107	0.00111664	1
1842	OG0006566	21.653	41.8896	105.055	96.1515	93.757	107.236	56.7043	77.8575	24.2426	63.8709	0.162217	-0.162217	-0.245843	0.245843	-0.576273	0.576273	-1.64869	1.64869	0.0799519	1
1843	OG0006585	92.0751	108.798	209.001	224.396	159.695	162.408	80.6035	91.9293	153.767	188.406	-0.498824	0.498824	-0.11827	0.11827	-0.92182	0.92182	-1.42154	1.42154	0.00967692	1
1844	OG0006588	141.256	158.598	105.685	110.373	156.689	165.261	61.6477	63.2609	62.569	80.1727	-0.326264	0.326264	-0.400376	0.400376	-0.194217	0.194217	-1.85451	1.85451	0.045228	1
1845	OG0006595	50.9819	51.2681	32.069	38.5871	44.4732	96.0383	28.4338	32.5825	39.4808	58.2588	-0.455319	0.455319	-1.81127	1.81127	-0.335595	0.335595	-0.94824	0.94824	0.00956971	1
1846	OG0006598	105.832	139.876	89.5719	92.2963	263.596	230.623	45.9877	34.0625	243.814	141.636	-0.093165	0.093165	0.414944	-0.414944	0.92651	-0.92651	1.64869	-1.64869	0.0330992	1
1847	OG0006612	29.5916	178.972	597.146	870.47	462.707	440.832	225.08	318.209	122.829	507.493	-0.405316	0.405316	0.0526898	-0.0526898	-0.373063	0.373063	-1.32815	1.32815	0.0467826	1
1848	OG0006614	237.026	341.511	380.044	397.54	252.808	276.219	204.229	224.694	363.411	472.757	-0.204528	0.204528	-0.402273	0.402273	-0.4337	0.4337	-1.18873	1.18873	0.0108291	1
1849	OG0006616	134.795	157.157	103.63	110.026	246.719	242.886	52.6643	59.3457	80.5732	103.425	-0.395258	0.395258	0.103381	-0.103381	-0.787674	0.787674	-1.64001	1.64001	0.0400945	1
1850	OG0006617	118.598	129.795	61.4508	61.357	78.0369	65.9491	38.4078	46.8649	60.4911	59.595	0.0117554	-0.0117554	1.29294	-1.29294	-1.52743	1.52743	0.114918	-0.114918	0.949599	1
1851	OG0006620	90.5066	87.1513	270.769	205.337	737.872	718.362	84.0032	93.458	1158.8	1009.64	1.77444	-1.77444	0.172984	-0.172984	-0.687897	0.687897	0.888128	-0.888128	0.197051	1
1852	OG0006633	354.65	383.822	203.63	219.182	195.811	183.081	117.114	128.214	159.309	163.018	-0.989191	0.989191	0.903551	-0.903551	-1.21684	1.21684	-0.309481	0.309481	0.276571	1
1853	OG0006634	101.742	112.765	54.3435	83.4317	79.6327	65.7403	41.7028	43.9018	44.7911	52.1123	-1.7884	1.7884	0.809489	-0.809489	-0.217591	0.217591	-0.639968	0.639968	0.272535	1
1854	OG0006636	124.385	173.932	59.5566	60.1403	121.936	98.5789	76.8939	80.3974	86.5808	91.1323	-0.0517333	0.0517333	1.12373	-1.12373	-0.23631	0.23631	-0.271721	0.271721	0.569088	1
1855	OG0006639	129.063	137.907	155.609	159.389	128.919	254.463	65.3564	74.157	101.124	108.768	-0.0754773	0.0754773	-2.05939	2.05939	-0.396708	0.396708	-0.229022	0.229022	0.0786405	1
1856	OG0006644	369.54	454.273	108.374	102.725	260.145	257.572	41.3732	48.0275	70.8808	84.1813	0.364771	-0.364771	0.0677468	-0.0677468	-1.01463	1.01463	-1.16925	1.16925	0.15778	1
1857	OG0006649	505.303	564.631	638.694	755.927	246.621	306.289	395.847	425.687	656.631	684.675	-1.16217	1.16217	-1.49197	1.49197	-0.502155	0.502155	-0.289059	0.289059	0.00486786	1
1858	OG0006655	56.4983	44.5069	99.2084	87.6032	210.124	252.417	67.3344	61.1452	128.601	125.604	0.776884	-0.776884	-1.14346	1.14346	0.602437	-0.602437	0.147457	-0.147457	0.765344	1
1859	OG0006656	42.6433	70.8284	114.688	99.2489	152.704	156.401	45.1635	48.4507	146.382	147.253	0.585832	-0.585832	-0.0970891	0.0970891	-0.28504	0.28504	-0.0240983	0.0240983	0.747687	1
1860	OG0006668	146.996	199.698	256.078	247.862	279.065	284.995	251.288	281.183	216.106	240.251	0.201585	-0.201585	-0.129979	0.129979	-0.694186	0.694186	-0.654174	0.654174	0.081613	1
1861	OG0006669	100.783	111.648	139.334	170.34	79.4413	91.8057	83.2408	86.3226	30.0147	44.3622	-0.90241	0.90241	-0.650758	0.650758	-0.163808	0.163808	-1.73864	1.73864	0.00998405	1
1862	OG0006677	127.336	206.475	158.923	239.345	406.66	378.36	105.082	120.81	124.443	312.674	-0.797416	0.797416	0.142359	-0.142359	-0.274959	0.274959	-1.70051	1.70051	0.0577448	1
1863	OG0006680	96.4414	90.5848	70.4569	76.8267	96.3357	116.61	58.0213	59.9805	52.4102	57.9916	-0.755462	0.755462	-1.66315	1.66315	-0.290014	0.290014	-0.883104	0.883104	0.00431286	1
1864	OG0006685	1830.04	526.572	263.03	377.354	920.919	985.487	310.052	385.913	330.069	336.725	-0.639283	0.639283	-0.121282	0.121282	-0.390327	0.390327	-0.0357475	0.0357475	0.0221139	1
1865	OG0006690	370.104	404.338	221.483	232.915	160.098	120.379	149.669	188.831	232.5	276.596	-0.25581	0.25581	1.43987	-1.43987	-1.17632	1.17632	-0.880667	0.880667	0.616765	1
1866	OG0006693	117.444	141.609	38.0704	43.6295	104.333	103.729	27.6088	30.0436	37.8646	46.7674	-0.891923	0.891923	0.0380553	-0.0380553	-0.553613	0.553613	-1.37891	1.37891	0.0162328	1
1867	OG0006696	129.365	197.903	384.987	312.867	118.555	145.236	183.79	226.387	435.674	404.605	0.790456	-0.790456	-0.773598	0.773598	-0.794322	0.794322	0.282811	-0.282811	0.673521	1
1868	OG0006705	2048.01	2471.14	2396.33	2105.43	3462.13	3709.06	1308.94	1364.76	1459.41	1387.25	1.1116	-1.1116	-0.592372	0.592372	-0.359176	0.359176	0.436017	-0.436017	0.607599	1
1869	OG0006717	251.183	448.758	384.354	388.129	343.526	277.279	194.174	190.206	655.966	724.681	-0.0338768	0.0338768	0.739615	-0.739615	0.0715605	-0.0715605	-0.344961	0.344961	0.528101	1
1870	OG0006725	144.257	152.964	135.702	139.75	212.4	187.253	170.683	169.685	41.471	33.0739	-0.234091	0.234091	1.00241	-1.00241	0.0467124	-0.0467124	1.79455	-1.79455	0.0937305	1
1871	OG0006746	42.8051	65.5732	243.917	236.737	166.406	173.504	70.9599	67.2819	144.07	124.265	0.14038	-0.14038	-0.196237	0.196237	0.250045	-0.250045	0.693662	-0.693662	0.138307	1
1872	OG0006753	251.979	315.241	107.692	105.635	98.1591	100.68	207.726	180.188	105.744	118.121	0.141851	-0.141851	-0.186532	0.186532	1.04446	-1.04446	-0.813436	0.813436	0.870473	1
1873	OG0006765	89.0954	71.575	115.164	94.7297	79.3146	65.7321	58.8455	60.1931	104.128	154.463	0.791067	-0.791067	0.760898	-0.760898	-0.091986	0.091986	-1.58167	1.58167	0.940848	1
1874	OG0006766	67.0728	94.4008	190.044	215.184	181.552	181.005	104.091	122.819	177.546	219.406	-0.586059	0.586059	0.0142657	-0.0142657	-0.779703	0.779703	-0.996179	0.996179	0.00874452	1
1875	OG0006767	69.13	84.4967	110.426	111.588	78.355	74.4389	86.868	89.3904	146.377	134.687	-0.0988056	0.0988056	0.483906	-0.483906	-0.270195	0.270195	0.785223	-0.785223	0.244713	1
1876	OG0006772	61.2266	118.558	249.759	275.498	295.799	309.423	126.262	127.686	62.1073	103.153	-0.254898	0.254898	-0.117093	0.117093	-0.0291507	0.0291507	-1.29192	1.29192	0.0873005	1
1877	OG0006781	468.998	739.685	145.967	118.193	154.631	138.858	477.276	632.08	223.261	233.303	0.769314	-0.769314	0.393221	-0.393221	-1.02103	1.02103	-0.160933	0.160933	0.986478	1
1878	OG0006784	116.677	112.332	270.139	248.904	76.5342	83.3461	46.7303	32.1605	230.42	199.63	0.418115	-0.418115	-0.435441	0.435441	1.88747	-1.88747	0.731722	-0.731722	0.104032	1
1879	OG0006785	263.07	348.04	184.215	124.164	92.6863	87.7957	45.7413	37.4488	296.406	333.524	1.54599	-1.54599	0.215129	-0.215129	0.791375	-0.791375	-0.467795	0.467795	0.135595	1
1880	OG0006788	146.693	188.568	77.0919	84.6484	101.552	92.2534	48.1313	64.6362	63.7234	91.9314	-0.363473	0.363473	0.373286	-0.373286	-1.13867	1.13867	-1.40987	1.40987	0.0672869	1
1881	OG0006800	446.911	354.42	136.964	158.52	204.908	210.094	126.18	128.639	108.515	102.888	-1.10532	1.10532	-0.189368	0.189368	-0.146198	0.146198	0.403246	-0.403246	0.284993	1
1882	OG0006805	173.44	251.907	99.9983	149.134	411.507	406.489	118.598	127.051	97.199	112.779	-1.48238	1.48238	0.0461093	-0.0461093	-0.258642	0.258642	-0.557678	0.557678	0.052474	1
1883	OG0006812	114.736	126.752	173.457	190.502	133.616	128.165	27.8577	33.4288	56.102	60.3968	-0.818715	0.818715	0.363982	-0.363982	-1.58912	1.58912	-0.644453	0.644453	0.0558316	1
1884	OG0006813	62.3491	88.2751	47.8649	40.4974	293.983	298.272	53.9829	48.4507	356.242	298.777	0.81374	-0.81374	-0.070669	0.070669	0.527096	-0.527096	0.856207	-0.856207	0.0125354	1
1885	OG0006814	202.678	345.608	63.0337	93.8606	95.5365	58.4014	69.6429	83.4663	40.8638	57.7243	-0.927016	0.927016	1.13816	-1.13816	-0.425969	0.425969	-0.806884	0.806884	0.477239	1
1886	OG0006831	405.67	485.892	268.405	282.972	101.731	59.4396	174.395	204.733	277.061	335.392	-0.183664	0.183664	1.82408	-1.82408	-0.55625	0.55625	-0.662073	0.662073	0.806186	1
1887	OG0006840	122.484	136.601	72.9845	79.7798	69.8406	98.2658	98.736	108.222	178.931	168.633	-0.493782	0.493782	-1.87703	1.87703	-0.50879	0.50879	0.328926	-0.328926	0.0959856	1
1888	OG0006844	129.236	126.09	88.4661	91.4289	98.4436	96.9749	54.4774	50.4585	177.084	172.639	-0.76098	0.76098	0.347268	-0.347268	1.76958	-1.76958	0.58735	-0.58735	0.233764	1
1889	OG0006847	600.048	1306.13	535.534	736.109	67.1068	81.2285	425.765	604.472	47.3308	114.38	-0.547739	0.547739	-0.330603	0.330603	-0.602378	0.602378	-1.43985	1.43985	0.00546147	1
1890	OG0006849	1574.57	1479.95	698.252	767.048	75.6522	83.6098	505.544	551.576	704.421	752.822	-1.07027	1.07027	-1.139	1.139	-0.992641	0.992641	-0.757137	0.757137	2.79839e-06	0.00549323
1891	OG0006852	437.045	695.474	2307.96	2715.6	3040.29	3028.16	2819.2	3155.95	1232.19	1713.22	-0.578604	0.578604	0.0142568	-0.0142568	-0.401864	0.401864	-1.16452	1.16452	0.0216457	1
1892	OG0006863	109.23	150.901	99.5244	110.371	92.1742	70.8985	46.8127	59.8747	108.057	105.831	-0.44587	0.44587	1.12565	-1.12565	-1.05633	1.05633	0.089823	-0.089823	0.83385	1
1893	OG0006865	106.384	166.336	151.656	149.31	233.296	170.903	71.2904	77.0122	109.438	108.768	0.0609181	-0.0609181	1.20608	-1.20608	-0.301454	0.301454	0.0240065	-0.0240065	0.329555	1
1894	OG0006901	254.488	434.804	240.282	299.309	138.404	140.566	170.19	187.243	51.0249	94.6011	-0.559092	0.559092	-0.0396262	0.0396262	-0.243828	0.243828	-1.52934	1.52934	0.0439663	1
1895	OG0006903	137.451	154.68	124.958	144.269	110.439	119.206	43.8448	35.0167	390.92	354.494	-0.962308	0.962308	-0.51217	0.51217	1.5019	-1.5019	0.655616	-0.655616	0.681128	1
1896	OG0006909	67.9617	96.9989	168.718	203.538	200.963	176.608	175.3	214.22	153.537	197.572	-0.752095	0.752095	0.518653	-0.518653	-0.803359	0.803359	-1.00841	1.00841	0.0828135	1
1897	OG0006932	74.6876	94.929	158.607	198.326	92.782	79.7865	68.5698	62.9436	213.605	249.535	-1.17817	1.17817	0.797312	-0.797312	0.45295	-0.45295	-0.821373	0.821373	0.600856	1
1898	OG0006943	284.402	289.611	262.239	327.12	294.457	238.266	237.34	294.874	174.609	233.415	-0.98875	0.98875	0.947343	-0.947343	-0.970926	0.970926	-1.29444	1.29444	0.163265	1
1899	OG0006953	32.5742	40.3908	49.4462	50.4084	80.0103	74.3482	32.3889	39.8829	45.9455	51.8423	-0.123699	0.123699	0.470921	-0.470921	-1.33121	1.33121	-0.774167	0.774167	0.163102	1
1900	OG0006956	372.392	1096.07	1545.95	2665.47	1088.91	1027.13	1509.87	2417.03	540.266	925.458	-0.853224	0.853224	0.0937018	-0.0937018	-0.741469	0.741469	-0.843497	0.843497	0.0108955	1
1901	OG0006959	236.1	238.42	297.938	284.937	191.396	165.27	227.881	254.842	210.564	194.822	0.461453	-0.461453	1.51541	-1.51541	-1.15543	1.15543	0.803339	-0.803339	0.348466	1
1902	OG0006967	286.577	326.62	118.167	99.3462	269.506	286.799	38.8174	46.5454	87.966	93.8021	1.23907	-1.23907	-0.44516	0.44516	-1.29641	1.29641	-0.459772	0.459772	0.545993	1
1903	OG0006968	11.2312	38.0043	278.51	268.37	679.727	744.85	149.174	151.911	179.395	225.555	0.0705079	-0.0705079	-0.173834	0.173834	-0.0345636	0.0345636	-0.433459	0.433459	0.113373	1
1904	OG0006971	637.36	517.847	87.9922	107.766	143.613	153.009	58.351	77.3307	88.4278	61.1985	-0.784551	0.784551	-0.246036	0.246036	-1.08647	1.08647	1.41345	-1.41345	0.671132	1
1905	OG0006979	208.997	250.405	33.8051	43.1046	118.522	134.952	35.6864	37.3419	74.5749	86.0494	-1.42141	1.42141	-0.762004	0.762004	-0.266489	0.266489	-0.839772	0.839772	0.00266849	1
1906	OG0006998	593.939	367.253	612.31	463.395	151.726	143.835	59.1752	66.6451	716.662	357.562	0.672353	-0.672353	0.129671	-0.129671	-0.288347	0.288347	1.62357	-1.62357	0.116994	1
1907	OG0007012	419.183	339.432	832.324	747.391	141.905	137.477	199.045	171.473	499.4	356.769	0.523392	-0.523392	0.154325	-0.154325	0.724425	-0.724425	1.62176	-1.62176	0.0139919	1
1908	OG0007036	93.7458	62.1582	345.805	345.89	462.524	486.66	235.548	277.059	283.747	301.719	-0.00118555	0.00118555	-0.243194	0.243194	-0.774485	0.774485	-0.293586	0.293586	0.0285716	1
1909	OG0007049	127.065	205.115	78.9876	96.294	98.935	91.3196	45.9061	58.2879	32.5544	45.6984	-0.634715	0.634715	0.257316	-0.257316	-0.763919	0.763919	-1.07979	1.07979	0.0337107	1
1910	OG0007054	53.6866	62.5972	83.5689	102.026	126.506	123.499	47.5544	53.1053	54.0287	68.9485	-1.14978	1.14978	0.13906	-0.13906	-0.637548	0.637548	-1.40263	1.40263	0.0192846	1
1911	OG0007055	241.155	313.249	361.296	262.532	74.7522	85.3924	124.202	101.133	174.085	164.621	1.39874	-1.39874	-0.587004	0.587004	0.904493	-0.904493	0.246856	-0.246856	0.157469	1
1912	OG0007056	62.708	81.8893	95.8925	96.9893	102.39	105.857	45.6597	50.9896	83.1175	109.302	-0.0607192	0.0607192	-0.177774	0.177774	-0.588869	0.588869	-1.45309	1.45309	0.0431028	1
1913	OG0007060	170.277	195.38	102.213	145.138	81.1044	78.0809	125.685	138.477	39.2499	37.1413	-1.88115	1.88115	0.205889	-0.205889	-0.524901	0.524901	0.299212	-0.299212	0.230389	1
1914	OG0007074	109.6	129.288	101.42	73.3503	98.2057	165.846	74.0102	71.7239	114.056	104.227	1.07482	-1.07482	-1.71428	1.71428	0.104985	-0.104985	0.301323	-0.301323	0.893518	1
1915	OG0007084	286.732	362.284	234.592	254.119	236.619	264.134	227.305	215.065	107.82	146.179	-0.414879	0.414879	-0.570517	0.570517	0.2873	-0.2873	-1.56809	1.56809	0.0810365	1
1916	OG0007085	382.781	388.46	92.7314	135.055	176.012	115.841	75.7409	94.3624	37.172	58.5261	-1.05773	1.05773	1.17366	-1.17366	-0.623194	0.623194	-1.27028	1.27028	0.301416	1
1917	OG0007087	105.988	127.422	117.06	121.15	120.322	104.902	66.1806	67.5982	124.905	149.926	-0.246603	0.246603	0.983339	-0.983339	-0.152193	0.152193	-1.30755	1.30755	0.604738	1
1918	OG0007091	285.413	313.398	143.598	175.9	178.945	160.68	102.577	133.916	43.1772	77.2357	-0.638407	0.638407	0.339597	-0.339597	-0.836756	0.836756	-1.78602	1.78602	0.0555026	1
1919	OG0007096	113.377	158.319	292.568	327.122	121.341	101.466	83.1766	81.8933	95.3566	131.753	-0.466924	0.466924	0.747002	-0.747002	0.0651008	-0.0651008	-1.34202	1.34202	0.45457	1
1920	OG0007098	257.23	311.557	197.467	229.957	177.58	187.004	117.525	142.073	91.6625	130.42	-0.687763	0.687763	-0.233877	0.233877	-0.855576	0.855576	-1.57905	1.57905	0.00540077	1
1921	OG0007102	59.484	56.6359	76.302	72.3092	80.6957	39.9606	34.6175	32.4196	94.4307	89.7908	0.166615	-0.166615	2.09365	-2.09365	0.203313	-0.203313	0.156193	-0.156193	0.10171	1
1922	OG0007108	47.1959	61.5387	122.115	104.116	171.817	146.45	45.2468	43.3729	133.45	133.354	0.96593	-0.96593	0.967684	-0.967684	0.256719	-0.256719	0.00436262	-0.00436262	0.0199802	1
1923	OG0007112	123.4	120.93	112.159	110.895	106.293	97.4281	45.8237	61.5683	103.207	118.926	0.0712059	-0.0712059	0.546528	-0.546528	-1.84127	1.84127	-0.888728	0.888728	0.208341	1
1924	OG0007114	400.511	450.54	122.27	139.922	181.312	211.308	39.2303	30.7842	63.2594	63.0665	-0.847767	0.847767	-0.962041	0.962041	1.51904	-1.51904	0.0192222	-0.0192222	0.872339	1
1925	OG0007115	33.2752	23.398	61.6135	56.3181	187.514	204.898	27.0318	21.5806	70.1881	62.7993	0.425916	-0.425916	-0.4202	0.4202	1.06365	-1.06365	0.527015	-0.527015	0.115492	1
1926	OG0007116	39.7278	177.092	57.9753	63.7905	116.748	102.298	38.9007	44.5365	85.6572	112.509	-0.154326	0.154326	0.213172	-0.213172	-0.218275	0.218275	-0.437871	0.437871	0.169399	1
1927	OG0007129	149.364	186.503	273.297	245.776	83.5899	70.7886	180.493	209.25	256.277	278.472	0.659541	-0.659541	1.0315	-1.0315	-0.917848	0.917848	-0.516308	0.516308	0.851503	1
1928	OG0007132	75.1488	105.053	74.7223	90.7337	112.883	147.617	84.4771	87.4863	63.7211	84.7158	-0.749623	0.749623	-1.03285	1.03285	-0.135552	0.135552	-1.09563	1.09563	0.00282513	1
1929	OG0007147	2399.79	2273.42	3700.25	3897.47	5424.79	5358.57	1721.11	1835.1	1866.91	2842.12	-0.258554	0.258554	0.0611638	-0.0611638	-0.319266	0.319266	-2.06275	2.06275	0.106149	1
1930	OG0007150	368.636	283.358	309.314	264.376	276.885	329.421	189.064	194.966	163.003	164.087	0.943781	-0.943781	-1.04401	1.04401	-0.185185	0.185185	-0.0399335	0.0399335	0.787083	1
1931	OG0007154	133.587	150.331	121.642	173.468	117.104	143.077	92.7179	96.7956	83.1152	119.989	-1.3364	1.3364	-0.759644	0.759644	-0.163735	0.163735	-1.38158	1.38158	0.00411932	1
1932	OG0007471	85.4713	116.866	80.8849	102.899	127.215	124.425	42.2806	43.6902	43.4058	51.845	-1.17627	1.17627	0.108883	-0.108883	-0.161018	0.161018	-0.870048	0.870048	0.0480705	1
1933	OG0007496	24.1821	55.5696	110.739	164.95	112.594	105.998	42.2798	47.9217	99.9719	123.199	-0.91196	0.91196	0.139952	-0.139952	-0.290087	0.290087	-0.482684	0.482684	0.0464023	1
1934	OG0007509	55.5086	70.2644	97.4723	117.675	222.989	208.158	57.6917	65.3777	214.489	221.277	-1.19239	1.19239	0.436809	-0.436809	-0.79304	0.79304	-0.19778	0.19778	0.133257	1
1935	OG0007528	54.9802	70.0545	43.6012	45.366	107.305	133.777	32.3898	37.6603	51.2581	53.9856	-0.230533	0.230533	-1.27611	1.27611	-0.874409	0.874409	-0.301185	0.301185	0.0087284	1
1936	OG0007531	92.3545	120.891	121.957	132.62	247.798	251.104	34.6966	36.2851	47.3331	59.5977	-0.486452	0.486452	-0.0769649	0.0769649	-0.259911	0.259911	-1.33208	1.33208	0.0333987	1
1937	OG0007546	110.906	126.122	163.346	176.771	164.314	158.656	77.5541	82.8316	85.6572	123.731	-0.417959	0.417959	0.185522	-0.185522	-0.348441	0.348441	-1.92546	1.92546	0.0984904	1
1938	OG0007547	200.076	242.56	61.9263	77.3481	107.18	165.143	230.272	275.471	508.174	639.511	-0.79246	0.79246	-1.52327	1.52327	-0.639598	0.639598	-0.81899	0.81899	0.000509062	0.974853
1939	OG0007553	53.8119	76.03	104.422	121.845	130.864	132.796	56.2906	67.1751	29.0911	53.983	-0.448221	0.448221	-0.0426551	0.0426551	-0.513147	0.513147	-1.7441	1.7441	0.0383103	1
1940	OG0007641	89.3719	77.3395	126.221	142.877	100.877	115.352	40.7138	42.2113	67.4199	84.7105	-0.802568	0.802568	-0.868006	0.868006	-0.234151	0.234151	-1.47371	1.47371	0.00328135	1
1941	OG0007651	125.224	159.939	94.3112	124.28	92.5466	95.412	64.5323	64.4256	65.1087	72.6899	-1.51449	1.51449	-0.168406	0.168406	0.00913231	-0.00913231	-0.607744	0.607744	0.0555261	1
1942	OG0007658	149.468	139.789	48.9723	68.8311	67.2387	77.4546	35.9328	35.1204	42.7132	84.1813	-0.950835	0.950835	-0.398237	0.398237	0.0644948	-0.0644948	-1.84324	1.84324	0.0357523	1
1943	OG0007716	366.487	525.674	338.223	398.384	258.066	244.847	197.058	227.867	43.8676	58.2588	-0.683186	0.683186	0.219863	-0.219863	-0.606492	0.606492	-1.17874	1.17874	0.0336247	1
1944	OG0007746	401.003	458.966	269.506	238.472	426.746	453.123	172.909	185.341	250.507	261.63	1.24418	-1.24418	-0.610536	0.610536	-0.706689	0.706689	-0.442324	0.442324	0.706281	1
1945	OG0007749	180.305	226.617	82.621	111.416	108.417	137.606	40.4666	49.8259	54.9499	77.7675	-1.05312	1.05312	-0.841955	0.841955	-0.735597	0.735597	-1.22008	1.22008	1.54541e-05	0.0303056
1946	OG0007817	117.942	128.884	114.687	110.896	222.058	216.137	78.4598	81.0343	127.216	129.078	0.680518	-0.680518	0.547251	-0.547251	-0.653711	0.653711	-0.294242	0.294242	0.770178	1
1947	OG0007850	92.2232	111.599	61.6103	64.1381	98.9247	108.519	34.6158	38.6124	69.7287	88.7271	-0.250688	0.250688	-0.57678	0.57678	-0.680633	0.680633	-1.49524	1.49524	0.00700197	1
1948	OG0007905	167.08	176.985	195.415	253.597	148.679	122.093	220.629	293.983	423.668	619.74	-0.954741	0.954741	0.723458	-0.723458	-1.05026	1.05026	-1.38457	1.38457	0.0930219	1
1949	OG0007912	40.5617	51.2436	439.805	544.737	371.565	368.64	340.789	321.376	202.022	218.337	-1.36889	1.36889	0.0507499	-0.0507499	0.37654	-0.37654	-0.498498	0.498498	0.230622	1
1950	OG0007931	31.6625	46.5897	75.0382	76.479	98.4229	99.6116	58.5158	57.9715	55.4117	55.0519	-0.105517	0.105517	-0.066606	0.066606	0.0518476	-0.0518476	0.0361386	-0.0361386	0.469157	1
1951	OG0007967	97.5807	112.153	69.5091	64.6595	121.095	130.201	28.0217	26.0237	57.799	57.1097	0.815069	-0.815069	-0.817067	0.817067	0.833621	-0.833621	0.135272	-0.135272	0.412785	1
1952	OG0007976	133.938	105.492	118.167	108.287	358.897	422.798	78.2142	78.4933	485.545	201.773	0.210575	-0.210575	-0.394562	0.394562	-0.00859385	0.00859385	1.99276	-1.99276	0.274427	1
1953	OG0007984	87.5499	98.3806	114.532	131.405	130.549	160.251	137.059	142.919	96.5087	111.44	-0.93696	0.93696	-1.39496	1.39496	-0.285844	0.285844	-0.980618	0.980618	0.00144306	1
1954	OG0008016	77.9131	122.623	259.236	322.774	102.758	103.863	37.3348	36.1783	35.0941	49.4398	-0.768964	0.768964	-0.0376918	0.0376918	0.110809	-0.110809	-1.19534	1.19534	0.0730992	1
1955	OG0008077	232.527	243.641	101.103	107.42	94.7347	131.055	90.2446	89.601	88.8896	123.733	-0.27604	0.27604	-1.46564	1.46564	0.0326089	-0.0326089	-1.49312	1.49312	0.0291134	1
1956	OG0008083	963.614	875.232	369.18	362.575	279.143	287.744	211.894	240.665	193.267	202.198	0.226079	-0.226079	-0.380027	0.380027	-1.59229	1.59229	-0.565658	0.565658	0.0738385	1
1957	OG0008097	166.798	158.907	77.2499	84.3007	292.093	407.623	27.2799	37.344	102.507	117.72	-0.381885	0.381885	-1.44468	1.44468	-1.36264	1.36264	-0.604434	0.604434	0.0024076	1
1958	OG0008168	245.884	306.033	140.914	136.098	224.409	238.478	99.3945	112.982	360.407	156.337	0.0886288	-0.0886288	-0.154943	0.154943	-0.326156	0.326156	2.01323	-2.01323	0.331694	1
1959	OG0008171	193.701	364.245	38.5475	30.0702	77.7317	76.8202	29.0939	29.7263	56.5684	62.7993	0.784621	-0.784621	0.0374566	-0.0374566	-0.0682787	0.0682787	-0.331511	0.331511	0.555605	1
1960	OG0008184	23.9989	70.1877	554.967	767.397	481.402	445.65	216.838	292.185	130.217	359.708	-0.477602	0.477602	0.114655	-0.114655	-0.440076	0.440076	-1.39263	1.39263	0.0473522	1
1961	OG0008192	89.1443	131.886	178.987	211.016	163.101	145.966	118.68	128.532	93.7381	117.052	-0.70517	0.70517	0.476046	-0.476046	-0.342193	0.342193	-0.949712	0.949712	0.135053	1
1962	OG0008709	417.434	567.087	90.5214	90.7319	392.967	395.332	54.7255	61.2488	291.602	315.613	-0.0147687	0.0147687	-0.0381299	0.0381299	-0.715075	0.715075	-0.502713	0.502713	0.041413	1
1963	OG0008827	49.6319	83.7554	154.342	220.743	200.262	189.665	120.328	132.024	116.367	144.044	-1.12734	1.12734	0.173072	-0.173072	-0.295135	0.295135	-0.676809	0.676809	0.0490113	1
1964	OG0008841	525.209	330.967	85.3066	106.377	105.192	86.2328	88.1867	87.4863	82.4226	120.262	-0.708792	0.708792	0.638616	-0.638616	0.0257082	-0.0257082	-1.20379	1.20379	0.317909	1
1965	OG0008890	56.7884	85.7594	80.7933	81.5649	154.3	125.773	104.834	128.32	43.1772	76.4313	-0.0270273	0.0270273	0.579223	-0.579223	-0.572849	0.572849	-1.58108	1.58108	0.26297	1
1966	OG0009165	129.457	187.902	116.268	190.155	286.625	304.784	108.79	154.132	45.4838	98.3452	-1.00738	1.00738	-0.128279	0.128279	-0.720486	0.720486	-1.53547	1.53547	0.00644081	1
1967	OG0010227	252.261	304.534	90.5198	90.9075	544.559	501.143	44.5042	44.9597	62.7999	69.7529	-0.0392784	0.0392784	0.763149	-0.763149	-0.0935859	0.0935859	-0.964155	0.964155	0.749391	1
1968	OG0010417	103.803	123.735	123.221	151.741	195.979	199.751	73.5148	76.5912	150.297	137.141	-1.51699	1.51699	-0.139373	0.139373	-0.299734	0.299734	0.669412	-0.669412	0.352422	1

## Sheet: Vespula_Swarm
	Row.names	V_vul Queen	V_vul Worker	A_pal Queen.x	A_pal Worker.x	A_caj Queen.x	A_caj Worker.x	P_qua Queen.x	P_qua Worker.x	M_cin Queen.x	M_cin Worker.x	A_pal Queen.y	A_pal Worker.y	A_caj Queen.y	A_caj Worker.y	P_qua Queen.y	P_qua Worker.y	M_cin Queen.y	M_cin Worker.y	p.coeffs	q.coeffs
1	OG0000680	206.079	160.984	1717.14	1366.28	1262.34	1903.35	1559.42	1367.29	2079.4	1822.66	0.866061	-0.866061	-1.54116	1.54116	0.499655	-0.499655	0.50079	-0.50079	0.840592	1
2	OG0000716	429.47	225.017	1350.37	1011.89	1108.89	826.906	679.818	586.595	1353.18	1364.63	0.798849	-0.798849	0.812126	-0.812126	0.410407	-0.410407	-0.0235061	0.0235061	0.0117325	1
3	OG0000981	1089.68	578.948	617.414	571.237	275.887	298.754	487.238	542.29	1051.62	615.742	0.201076	-0.201076	-0.205968	0.205968	-0.276768	0.276768	1.35307	-1.35307	0.353494	1
4	OG0001099	414.254	320.112	77.5482	75.9393	142.958	111.204	61.1598	62.4266	132.998	115.261	0.115037	-0.115037	1.37113	-1.37113	-0.112493	0.112493	0.784069	-0.784069	0.0637682	1
5	OG0001106	239.692	187.157	171.12	142.808	183.414	180.693	247.934	198.759	230.133	195.092	0.930785	-0.930785	0.0771272	-0.0771272	1.13617	-1.13617	0.850477	-0.850477	0.00381903	1
6	OG0001182	416.529	327.156	310.723	267.226	460.526	551.592	338.418	285.046	470.106	473.98	0.84678	-0.84678	-1.01234	1.01234	0.96318	-0.96318	-0.0461624	0.0461624	0.583939	1
7	OG0001186	1351.64	1526.96	116.122	160.107	130.424	105.212	74.8016	112.836	274.569	251.727	-1.16906	1.16906	0.785554	-0.785554	-1.4882	1.4882	0.318642	-0.318642	0.360741	1
8	OG0001237	516.449	414.521	802.556	913.94	329.455	292.635	479.399	447.392	571.679	478.279	-0.811031	0.811031	0.739758	-0.739758	0.431632	-0.431632	1.11182	-1.11182	0.258357	1
9	OG0001247	77.5624	101.812	2773.34	2599.87	3404.87	3376.62	2346.58	2420.53	1884.23	1999.58	0.478805	-0.478805	0.0617843	-0.0617843	-0.23008	0.23008	-0.440464	0.440464	0.825182	1
10	OG0001257	487.899	615.636	1032.66	1181.91	256.239	259.11	1651.51	1830.9	619.934	888.002	-0.625599	0.625599	-0.0517091	0.0517091	-0.478156	0.478156	-1.65012	1.65012	0.0263757	1
11	OG0001302	413.188	310.328	424.145	298.908	861.208	813.742	318.603	322.265	648.496	631.968	1.62359	-1.62359	0.265644	-0.265644	-0.053553	0.053553	0.12099	-0.12099	0.12148	1
12	OG0001319	936.315	1097.13	1275	1407.83	1102	1010.69	3343.09	2943.74	1251.28	1586.87	-0.621176	0.621176	0.542228	-0.542228	0.796929	-0.796929	-1.48345	1.48345	0.627763	1
13	OG0001320	103.355	160.024	772.613	803.033	374.917	430.991	813.305	858.387	575.491	666.743	-0.170598	0.170598	-0.614826	0.614826	-0.238303	0.238303	-0.649108	0.649108	0.00314247	1
14	OG0001331	785.087	979.316	10704.7	7266.26	25310.1	27125.8	8605.18	7153.27	8413.66	9687.19	1.6124	-1.6124	-0.291815	0.291815	0.776446	-0.776446	-0.592918	0.592918	0.333854	1
15	OG0001356	633.453	1690.9	599.22	545.917	399.025	424.54	532.914	542.319	416.779	495.837	0.211635	-0.211635	-0.140867	0.140867	-0.0397691	0.0397691	-0.393871	0.393871	0.345414	1
16	OG0001416	447.7	405.212	480.718	388.134	1225.71	1094.22	344.69	324.511	350.123	437.873	1.29734	-1.29734	0.690021	-0.690021	0.367134	-0.367134	-1.35579	1.35579	0.557598	1
17	OG0001430	409.615	304.035	184.575	212.417	276.231	374.085	368.844	330.217	301.239	248.084	-0.598151	0.598151	-1.28334	1.28334	0.471258	-0.471258	0.825284	-0.825284	0.684665	1
18	OG0001448	219.838	214.453	257.175	191.325	544.544	587.929	242.262	252.327	408.894	430.712	1.99933	-1.99933	-0.521686	0.521686	-0.277125	0.277125	-0.353863	0.353863	0.634545	1
19	OG0001454	56.7333	35.8173	118.16	89.8404	230.671	275.074	91.7397	61.5297	227.616	215.472	0.844663	-0.844663	-0.544677	0.544677	1.2228	-1.2228	0.170029	-0.170029	0.175036	1
20	OG0001466	1197.02	591.518	1476.38	1204.9	1963.62	1710.34	365.704	459.768	2094.37	2189.7	0.567783	-0.567783	0.386598	-0.386598	-0.639013	0.639013	-0.124787	0.124787	0.812492	1
21	OG0001476	1322.13	1627.56	2393.28	2207.02	852.315	1420.22	2287.69	2212.91	1649.02	2214.53	0.276474	-0.276474	-1.70641	1.70641	0.113453	-0.113453	-0.999468	0.999468	0.132619	1
22	OG0001482	645.364	717.479	1004.56	960.189	1240.8	1226.2	1130.67	1081.88	1188.65	924.886	0.343912	-0.343912	0.0901481	-0.0901481	0.335782	-0.335782	1.90041	-1.90041	0.0633114	1
23	OG0001494	1052.19	798.671	1283.3	945.44	1177.7	1168.77	1070.93	888.503	1345.95	1305.11	1.42871	-1.42871	0.0358704	-0.0358704	0.877453	-0.877453	0.14519	-0.14519	0.0362821	1
24	OG0001504	45.3694	56.6131	170.527	159.264	100.391	83.2843	78.41	86.4626	146.015	104.331	0.317383	-0.317383	0.865518	-0.865518	-0.453891	0.453891	1.54737	-1.54737	0.106274	1
25	OG0001535	1826.4	2849.45	1605.57	2447.57	738.58	848.668	1935.02	2742.46	286.638	523.007	-0.959677	0.959677	-0.320404	0.320404	-0.797446	0.797446	-1.34865	1.34865	0.00127103	1
26	OG0001538	1040.09	935.323	1472.23	1398.97	606.011	562.159	1883.72	1991.91	1276.05	1655.1	0.361841	-0.361841	0.532358	-0.532358	-0.395882	0.395882	-1.83392	1.83392	0.414813	1
27	OG0001558	250.64	390.194	1478.95	1254.89	1096.94	993.212	1877.45	1871.72	1344.93	1383.84	0.729432	-0.729432	0.441689	-0.441689	0.0136009	-0.0136009	-0.126898	0.126898	0.105792	1
28	OG0001586	24.4002	37.7968	968.954	979.615	576.484	509.581	1234.48	1089.42	328.627	341.578	-0.0497183	0.0497183	0.559823	-0.559823	0.567292	-0.567292	-0.175609	0.175609	0.156518	1
29	OG0001595	2121.42	2576.78	1107.63	1334	418.635	620.746	1315.87	1249.26	465.024	704.178	-0.627242	0.627242	-1.31556	1.31556	0.175706	-0.175706	-1.38384	1.38384	0.0221548	1
30	OG0001621	406.878	606.668	244.71	225.919	265.514	289.744	261.417	188.536	397.095	262.326	0.254954	-0.254954	-0.278654	0.278654	1.03432	-1.03432	1.30505	-1.30505	0.0645631	1
31	OG0001649	73.1086	92.9747	610.3	607.512	1224.31	1225.41	728.901	757.369	758.645	975.444	0.0278927	-0.0278927	-0.00546356	0.00546356	-0.233384	0.233384	-1.52333	1.52333	0.146598	1
32	OG0001681	376.818	241.617	639.379	448.888	1130.17	1132.93	564.552	472.864	1574.43	1217.9	1.15952	-1.15952	-0.00808458	0.00808458	0.585468	-0.585468	0.845813	-0.845813	0.0102173	1
33	OG0001708	511.161	323.798	475.578	411.125	894.844	903.278	453.21	378.686	654.847	833.35	0.551853	-0.551853	-0.0356112	0.0356112	0.680123	-0.680123	-0.910631	0.910631	0.789866	1
34	OG0001725	430.953	556.938	118.894	152.3	118.36	101.694	338.89	348.01	187.919	227.883	-1.21066	1.21066	0.744339	-0.744339	-0.130498	0.130498	-0.944617	0.944617	0.262844	1
35	OG0001726	268.776	192.049	234.027	179.514	69.1851	119.446	122.006	81.8004	204.101	140.441	0.64296	-0.64296	-1.29963	1.29963	0.962212	-0.962212	0.901215	-0.901215	0.458152	1
36	OG0001731	1000.66	1060.29	3960.3	3811.94	6079.27	5864.61	3781.56	3637.61	4098.27	3971.34	0.873591	-0.873591	0.822514	-0.822514	0.887994	-0.887994	0.719886	-0.719886	7.9388e-08	0.000148138
37	OG0001749	147.378	89.9102	178.24	153.99	201.16	167.619	138.63	136.151	540.26	465.03	0.554639	-0.554639	0.691121	-0.691121	0.068567	-0.068567	0.568643	-0.568643	0.00287775	1
38	OG0001763	273.881	435.849	470.434	536.007	175.821	203.485	99.8944	113.911	140.305	293.127	-0.31686	0.31686	-0.354698	0.354698	-0.318822	0.318822	-1.71474	1.71474	0.0327639	1
39	OG0001768	488.476	390.193	503.8	435.248	528.242	605.171	309.571	311.78	365.673	352.087	1.02516	-1.02516	-0.953166	0.953166	-0.049926	0.049926	0.265816	-0.265816	0.811976	1
40	OG0001771	156.794	90.9531	274.584	254.821	632.467	429.635	404.784	340.991	217.753	227.22	0.232251	-0.232251	1.18811	-1.18811	0.532173	-0.532173	-0.132363	0.132363	0.0609568	1
41	OG0001783	426.502	335.374	292.25	312.956	170.968	141.185	321.166	332.585	286.631	282.855	-0.459682	0.459682	1.28187	-1.28187	-0.234675	0.234675	0.0890818	-0.0890818	0.559829	1
42	OG0001802	135.967	262.227	392.489	471.033	972.128	874.006	677.778	739.074	356.979	390.373	-0.567728	0.567728	0.331746	-0.331746	-0.270027	0.270027	-0.278896	0.278896	0.192585	1
43	OG0001805	772.655	486.461	773.703	725.431	323.635	266.221	965.384	837.736	1206.52	1323.77	0.25941	-0.25941	0.78417	-0.78417	0.570324	-0.570324	-0.373303	0.373303	0.132414	1
44	OG0001811	661.413	622.679	287.045	280.549	136.381	101.079	352.845	340.121	316.79	358.387	0.146996	-0.146996	1.90956	-1.90956	0.235852	-0.235852	-0.791349	0.791349	0.381257	1
45	OG0001815	137.033	152.98	311.789	337.358	183.389	398.227	514.683	507.308	333.613	308.366	-0.221255	0.221255	-2.0749	2.0749	0.0405396	-0.0405396	0.22091	-0.22091	0.223441	1
46	OG0001830	185.973	151.773	207.321	279.919	282.372	233.388	322.579	332.404	260.291	283.528	-1.51503	1.51503	0.965714	-0.965714	-0.152523	0.152523	-0.434462	0.434462	0.460554	1
47	OG0001919	61.837	85.7353	88.2308	108.637	113.219	198.94	172.188	189.249	134.439	166.948	-0.61887	0.61887	-1.63952	1.63952	-0.281823	0.281823	-0.644001	0.644001	0.00853973	1
48	OG0001920	316.605	282.054	69.8329	73.4101	115.376	106.912	108.36	96.5101	62.2153	74.8591	-0.403256	0.403256	0.614859	-0.614859	0.933967	-0.933967	-1.48948	1.48948	0.831727	1
49	OG0001923	203.926	122.129	683.688	610.679	995.451	1049.84	295.135	252.038	865.3	707.487	0.415087	-0.415087	-0.195686	0.195686	0.579614	-0.579614	0.738401	-0.738401	0.0374951	1
50	OG0001924	290.488	245.074	562.026	424.418	681.006	873.808	453.525	390.163	736.432	484.91	0.985976	-0.985976	-0.876451	0.876451	0.530818	-0.530818	1.45557	-1.45557	0.191533	1
51	OG0001930	452.71	636.408	177.451	191.534	240.778	229.142	271.769	264.057	157.76	183.168	-0.425069	0.425069	0.275788	-0.275788	0.16029	-0.16029	-0.830009	0.830009	0.305964	1
52	OG0001943	423.997	511.769	129.772	135.636	113.95	128.154	206.534	188.536	171.727	161.635	-0.373793	0.373793	-0.992594	0.992594	0.770795	-0.770795	0.512174	-0.512174	0.944475	1
53	OG0001945	904.493	791.378	1089.24	1112.3	1625.39	1597.38	1637.99	1641.92	1663.62	1738.25	-0.310711	0.310711	0.257787	-0.257787	-0.0356085	0.0356085	-0.650599	0.650599	0.226316	1
54	OG0001962	697.226	769.593	569.631	559.753	948.275	965.133	680.913	707.5	582.157	782.011	0.118736	-0.118736	-0.119607	0.119607	-0.259959	0.259959	-1.98883	1.98883	0.149899	1
55	OG0001967	136.245	116.683	136.103	164.959	104.572	104.22	152.744	144.584	177.123	202.048	-1.42898	1.42898	0.0251297	-0.0251297	0.409182	-0.409182	-0.980029	0.980029	0.153764	1
56	OG0001969	663.356	473.875	505.65	431.586	542.839	494.153	496.795	406.302	676.759	903.903	0.648106	-0.648106	0.385057	-0.385057	0.821809	-0.821809	-1.17857	1.17857	0.620351	1
57	OG0001970	1003.21	931.214	349.509	394.298	780.994	707.275	753.208	781.947	331.071	480.276	-0.626032	0.626032	0.51497	-0.51497	-0.194626	0.194626	-1.91188	1.91188	0.175112	1
58	OG0001973	141.348	105.432	75.9655	75.3044	130.53	110.456	80.6055	73.5486	122.523	105.659	0.049075	-0.049075	0.935271	-0.935271	0.513986	-0.513986	0.82977	-0.82977	0.00609287	1
59	OG0001976	1688.08	1508.47	529.579	490.015	384.346	435.251	695.654	640.23	999.571	813.812	0.571633	-0.571633	-0.914971	0.914971	0.611193	-0.611193	1.50907	-1.50907	0.25744	1
60	OG0001987	160.831	215.56	264.295	354.478	833.008	866.476	146.784	169.343	103.48	159.317	-1.01378	1.01378	-0.136981	0.136981	-0.496378	0.496378	-1.47789	1.47789	0.00938776	1
61	OG0001993	149.327	115.183	202.381	202.505	76.3463	109.143	122.948	105.659	602.79	716.433	-0.00262647	0.00262647	-1.51781	1.51781	0.649241	-0.649241	-0.739494	0.739494	0.268977	1
62	OG0001995	211.533	201.897	407.52	477.15	75.0986	246.01	837.579	852.984	601.837	640.577	-0.309465	0.309465	-2.09273	2.09273	-0.0358287	0.0358287	-0.122597	0.122597	0.112709	1
63	OG0001996	286.639	201.049	657.575	588.532	230.709	202.259	477.362	482.552	606.285	632.296	0.597789	-0.597789	0.70893	-0.70893	-0.058339	0.058339	-0.226583	0.226583	0.17262	1
64	OG0001998	435.315	275.043	126.214	100.409	207.53	262.651	126.554	104.405	137.762	148.718	0.813005	-0.813005	-0.837025	0.837025	0.684715	-0.684715	-0.273044	0.273044	0.740131	1
65	OG0002001	102.148	137.579	802.327	644.615	899.106	978.45	501.86	484.804	582.157	575.985	1.22137	-1.22137	-0.47354	0.47354	0.193713	-0.193713	0.0597134	-0.0597134	0.356314	1
66	OG0002002	1139.41	993.274	227.107	230.138	315.342	304.997	243.698	254.01	234.58	293.796	-0.104791	0.104791	0.263642	-0.263642	-0.327525	0.327525	-1.77169	1.77169	0.174803	1
67	OG0002003	26.1639	30.1325	123.642	103.151	133.933	93.1003	100.139	86.2851	64.1198	49.3518	0.735317	-0.735317	1.46372	-1.46372	0.604802	-0.604802	1.05919	-1.05919	0.000382633	0.702897
68	OG0002005	71.6121	190.774	196.244	230.351	654.735	622.605	257.812	284.868	274.157	398.802	-0.33916	0.33916	0.106703	-0.106703	-0.211493	0.211493	-0.785719	0.785719	0.0570073	1
69	OG0002007	80.3458	90.1375	355.497	324.43	310.417	312.67	456.346	424.964	372.971	352.746	1.12341	-1.12341	-0.0889053	0.0889053	0.875495	-0.875495	0.685184	-0.685184	0.0127432	1
70	OG0002008	201.05	144.599	115.135	96.6138	132.363	166.611	59.7469	39.8239	122.523	107.647	0.612878	-0.612878	-0.80264	0.80264	1.40198	-1.40198	0.45286	-0.45286	0.244391	1
71	OG0002009	249.202	152.718	186.157	173.604	239.831	233.037	139.885	125.21	416.776	461.718	0.290935	-0.290935	0.119789	-0.119789	0.461546	-0.461546	-0.426539	0.426539	0.444087	1
72	OG0002016	447.978	706.36	765.392	1060.2	891.854	736.781	667.74	715.215	315.52	554.459	-0.851476	0.851476	0.502059	-0.502059	-0.18101	0.18101	-1.44817	1.44817	0.147768	1
73	OG0002021	21.0142	38.3508	97.133	160.316	186.91	173.858	224.409	236.073	255.527	248.746	-1.3549	1.3549	0.199724	-0.199724	-0.139834	0.139834	0.0742322	-0.0742322	0.271965	1
74	OG0002027	468.668	398.998	549.168	450.364	176.859	216.474	562.201	528.115	448.518	492.193	1.22097	-1.22097	-1.24403	1.24403	0.386156	-0.386156	-0.573469	0.573469	0.895047	1
75	OG0002029	727.055	738.123	311.575	307.554	192.817	205.553	145.841	131.221	164.75	189.786	0.146111	-0.146111	-0.719179	0.719179	1.18702	-1.18702	-1.58857	1.58857	0.582944	1
76	OG0002031	295.265	281.73	204.751	172.762	258.985	271.107	136.589	124.494	249.813	273.257	1.6137	-1.6137	-0.43552	0.43552	0.882174	-0.882174	-0.853523	0.853523	0.48443	1
77	OG0002032	224.476	178.873	283.397	284.277	263.578	280.757	244.481	236.792	400.904	427.94	-0.0267505	0.0267505	-0.544812	0.544812	0.275779	-0.275779	-0.563084	0.563084	0.189778	1
78	OG0002041	200.447	175.632	111.968	152.511	132.141	156.85	266.464	245.243	120.301	160.311	-1.35952	1.35952	-0.758291	0.758291	0.367787	-0.367787	-1.2645	1.2645	0.0361189	1
79	OG0002054	295.916	316.198	323.447	154.199	7751.49	7386.1	725.451	604.352	3212.34	3025.7	2.03507	-2.03507	0.138631	-0.138631	0.523014	-0.523014	0.171842	-0.171842	0.0641362	1
80	OG0002060	1637.39	1236.62	1561.85	1435.04	3178.49	3135.05	2487.16	2375.08	2308.31	2265.87	0.606522	-0.606522	0.0986325	-0.0986325	0.33042	-0.33042	0.132972	-0.132972	0.0121604	1
81	OG0002065	2989.01	3886.41	1208.12	1522.08	4807.91	4264.18	1649.9	1953.16	911.644	1310.64	-0.901807	0.901807	0.470012	-0.470012	-0.660046	0.660046	-1.408	1.408	0.0675402	1
82	OG0002078	296.054	210.571	617.614	500.988	118.153	126.58	399.228	412.954	470.103	530.943	1.04838	-1.04838	-0.346228	0.346228	-0.169938	0.169938	-0.611131	0.611131	0.94193	1
83	OG0002084	374.637	282.968	764.403	699.274	545.804	537.328	280.237	238.405	338.057	334.864	0.564087	-0.564087	0.0992022	-0.0992022	1.0225	-1.0225	0.0601654	-0.0601654	0.0343421	1
84	OG0002085	184.442	159.991	441.748	409.02	102.167	167.928	102.09	92.0254	47.9311	54.9826	0.301659	-0.301659	-1.90922	1.90922	0.406571	-0.406571	-0.537293	0.537293	0.294388	1
85	OG0002091	176.881	237.084	163.207	271.483	189.421	95.0771	578.523	630.618	260.32	259.68	-1.19651	1.19651	1.59294	-1.59294	-0.206959	0.206959	0.00591263	-0.00591263	0.908696	1
86	OG0002093	179.943	189.729	445.235	428.504	323.901	358.762	521.874	534.571	623.575	641.938	0.639847	-0.639847	-1.70635	1.70635	-0.401609	0.401609	-0.484871	0.484871	0.200274	1
87	OG0002096	606.256	607.482	672.651	617.049	245.697	228.381	677.637	739.246	547.069	506.697	1.12982	-1.12982	0.957226	-0.957226	-1.13951	1.13951	1.00401	-1.00401	0.251424	1
88	OG0002098	2288.97	2285.1	5980.21	4873.59	3504.67	3754.12	7550.52	6284.59	6790.22	3864.35	0.700387	-0.700387	-0.236073	0.236073	0.628562	-0.628562	1.88643	-1.88643	0.0521425	1
89	OG0002108	103.262	79.865	387.543	360.712	426.569	379.622	542.596	508.739	628.815	574.336	0.490118	-0.490118	0.79592	-0.79592	0.44016	-0.44016	0.618899	-0.618899	4.51596e-05	0.0839968
90	OG0002110	632.838	847.892	535.919	563.851	1272.77	1215.07	955.351	941.962	519.612	770.415	-0.219729	0.219729	0.200635	-0.200635	0.0610508	-0.0610508	-1.68197	1.68197	0.228944	1
91	OG0002113	50.1461	59.0916	167.36	200.393	159.463	157.54	97.6989	111.218	54.9177	74.8591	-0.923102	0.923102	0.0623495	-0.0623495	-0.665004	0.665004	-1.5791	1.5791	0.0177988	1
92	OG0002132	577.172	1042.58	548.376	911.063	422.244	336.847	330.261	438.063	491.056	898.932	-1.02841	1.02841	0.465552	-0.465552	-0.580631	0.580631	-1.21433	1.21433	0.0684592	1
93	OG0002149	90.1339	117.173	358.466	421.039	202.342	210.553	269.53	283.56	293.932	327.905	-1.02723	1.02723	-0.254484	0.254484	-0.324623	0.324623	-0.699121	0.699121	0.00389717	1
94	OG0002161	149.465	283.392	456.387	494.449	469.339	577.261	464.156	501.384	372.336	246.425	-0.218631	0.218631	-0.563188	0.563188	-0.210583	0.210583	1.11138	-1.11138	0.913143	1
95	OG0002163	189.267	231.311	662.522	526.723	117.787	114.729	730.468	616.732	597.39	604.805	1.38995	-1.38995	0.16013	-0.16013	1.02764	-1.02764	-0.0750742	0.0750742	0.0439394	1
96	OG0002171	698.2	929.386	193.277	203.984	1053.75	1386.19	383.895	418.33	306.953	375.269	-0.25233	0.25233	-1.27564	1.27564	-0.401875	0.401875	-0.937545	0.937545	0.00525457	1
97	OG0002172	119.265	79.8976	86.4524	96.6138	201.07	228.433	152.586	171.135	102.214	127.523	-0.474299	0.474299	-0.544386	0.544386	-0.489618	0.489618	-0.941352	0.941352	0.000229889	0.423686
98	OG0002180	477.528	417.463	305.983	277.809	325.008	312.777	339.832	306.574	239.653	274.25	0.853701	-0.853701	0.339237	-0.339237	0.910154	-0.910154	-1.19093	1.19093	0.534955	1
99	OG0002185	280.328	213.766	235.614	182.05	275.874	368.496	185.832	173.472	265.367	279.878	1.13803	-1.13803	-1.27551	1.27551	0.305238	-0.305238	-0.236158	0.236158	0.963416	1
100	OG0002213	234.636	197.624	179.825	150.824	108.841	205.302	215.628	195.352	759.277	712.789	0.55412	-0.55412	-1.93994	1.93994	0.311679	-0.311679	0.199512	-0.199512	0.612197	1
101	OG0002217	39.6621	69.5601	505.646	607.51	64.1285	98.0912	454.151	514.123	88.8789	111.621	-0.51184	0.51184	-1.17102	1.17102	-0.34643	0.34643	-0.634434	0.634434	0.00186725	1
102	OG0002228	762.033	1342.93	1542.91	1512.7	850.926	780.701	1754.77	1785.86	1326.09	1891.63	0.0634972	-0.0634972	0.27645	-0.27645	-0.0564054	0.0564054	-1.1289	1.1289	0.37722	1
103	OG0002234	229.255	128.226	176.859	227.398	153.984	193.373	143.704	133.595	453.298	430.636	-0.79836	0.79836	-0.724153	0.724153	0.232802	-0.232802	0.163726	-0.163726	0.201776	1
104	OG0002247	121.633	87.073	158.655	156.519	319.238	400.786	116.517	102.789	225.48	226.803	0.0683627	-0.0683627	-1.14249	1.14249	0.631492	-0.631492	-0.0295206	0.0295206	0.668747	1
105	OG0002248	262.098	221.071	128.589	122.769	134.233	108.805	155.565	177.772	87.2918	126.529	0.206115	-0.206115	0.931229	-0.931229	-0.59294	0.59294	-1.63328	1.63328	0.510306	1
106	OG0002254	321.753	215.073	485.859	335.616	1181.3	1250.9	600.306	513.943	817.994	767.427	1.36502	-1.36502	-0.213584	0.213584	0.578471	-0.578471	0.238045	-0.238045	0.0817808	1
107	OG0002256	635.808	453.035	366.376	291.508	588.499	716.915	253.89	222.26	339.01	335.52	1.02709	-1.02709	-0.887841	0.887841	0.599537	-0.599537	0.0466989	-0.0466989	0.52671	1
108	OG0002267	397.692	449.125	551.733	543.808	411.477	411.2	448.51	464.793	546.596	665.749	0.131027	-0.131027	0.00609727	-0.00609727	-0.322898	0.322898	-1.78003	1.78003	0.165335	1
109	OG0002268	417.779	719.567	1052.04	1544.73	813.616	798.203	572.393	762.215	255.21	791.616	-0.645067	0.645067	0.0325118	-0.0325118	-0.48357	0.48357	-1.74216	1.74216	0.036139	1
110	OG0002284	100.896	131.391	252.03	325.906	415.114	422.583	432.667	440.933	215.531	277.563	-1.21794	1.21794	-0.0849556	0.0849556	-0.0901563	0.0901563	-1.19862	1.19862	0.0298794	1
111	OG0002292	658.168	584.518	111.574	131.628	248.318	279.476	202.925	194.276	135.544	123.154	-1.35907	1.35907	-0.973039	0.973039	0.358908	-0.358908	0.789347	-0.789347	0.44827	1
112	OG0002293	202.348	182.362	242.876	276.809	104.678	99.8827	173.131	156.606	351.707	308.032	-1.15404	1.15404	0.41434	-0.41434	0.885716	-0.885716	1.17003	-1.17003	0.403934	1
113	OG0002296	49.1255	97.9965	99.3091	64.3375	133.339	105.365	67.119	63.5029	244.1	136.791	0.90687	-0.90687	0.497318	-0.497318	0.117477	-0.117477	1.19556	-1.19556	0.00654187	1
114	OG0002306	101.685	64.2758	126.014	137.952	84.824	147.688	86.4063	84.6706	87.9267	123.214	-0.24449	0.24449	-1.46157	1.46157	0.0548465	-0.0548465	-0.903461	0.903461	0.0375268	1
115	OG0002313	101.174	78.5276	126.809	124.667	414.995	461.616	158.075	142.435	164.429	166.269	0.123165	-0.123165	-0.769011	0.769011	0.752537	-0.752537	-0.0804556	0.0804556	0.977354	1
116	OG0002317	411.239	364.529	539.472	450.782	2373.44	2579.85	929.681	808.394	862.126	810.165	1.37049	-1.37049	-0.637648	0.637648	1.06781	-1.06781	0.47546	-0.47546	0.119251	1
117	OG0002319	118.339	84.6272	872.814	807.279	1109.14	1136.5	757.756	646.869	895.455	886.014	0.439061	-0.439061	-0.137165	0.137165	0.888595	-0.888595	0.0596521	-0.0596521	0.0985205	1
118	OG0002320	41.8893	44.7749	193.473	201.872	379.689	380.881	326.187	344.959	341.781	426.714	-0.373506	0.373506	-0.0275379	0.0275379	-0.491726	0.491726	-1.94301	1.94301	0.0554956	1
119	OG0002325	1914.89	1726.54	15280.5	12158.5	22917.8	19841.3	15323.3	18184.2	26088.3	8604.84	0.454476	-0.454476	0.287392	-0.287392	-0.341049	0.341049	2.01292	-2.01292	0.138779	1
120	OG0002339	38.7812	35.3506	191.746	218.671	151.054	181.031	211.552	229.077	145.063	160.97	-1.01292	1.01292	-1.3937	1.3937	-0.614074	0.614074	-0.802495	0.802495	0.000191684	0.353657
121	OG0002348	248.459	164.002	162.218	149.558	76.7841	103.05	153.997	158.219	256.482	269.282	0.336095	-0.336095	-1.2089	1.2089	-0.111925	0.111925	-0.201504	0.201504	0.245748	1
122	OG0002350	723.204	400.434	3199.36	2807.77	2231.89	2011.38	3539.49	3168.28	3746.56	3115.79	0.435168	-0.435168	0.346918	-0.346918	0.369436	-0.369436	0.613614	-0.613614	4.81321e-05	0.0894294
123	OG0002351	134.296	168.894	250.399	285.96	174.58	324.011	560.635	431.065	130.779	176.875	-0.367124	0.367124	-1.65958	1.65958	0.723477	-0.723477	-0.82966	0.82966	0.179946	1
124	OG0002356	449.695	425.12	593.679	523.768	871.328	872	818.285	794.682	853.235	1095.34	0.930227	-0.930227	-0.00573237	0.00573237	0.217584	-0.217584	-1.84739	1.84739	0.688112	1
125	OG0002357	596.467	1329.76	147.973	190.059	372.825	354.314	36.1925	71.6058	98.4271	89.9892	-0.50735	0.50735	0.103741	-0.103741	-1.33868	1.33868	0.182488	-0.182488	0.168041	1
126	OG0002366	36.8974	54.7647	467.069	538.747	335.45	275.22	541.029	606.326	147.923	269.945	-0.402146	0.402146	0.55657	-0.55657	-0.321152	0.321152	-1.64784	1.64784	0.206819	1
127	OG0002367	492.327	725.341	747.982	858.958	655.232	696.734	833.499	837.022	409.157	503.455	-0.636284	0.636284	-0.282826	0.282826	-0.019435	0.019435	-0.951995	0.951995	0.0167988	1
128	OG0002368	263.815	165.73	240.755	246.17	129.461	119.976	62.8833	51.3046	104.75	90.0919	-0.0893779	0.0893779	0.30563	-0.30563	0.815026	-0.815026	0.604691	-0.604691	0.025709	1
129	OG0002372	84.3352	122.097	255.592	275.913	151.091	209.061	164.343	128.262	236.481	185.811	-0.26969	0.26969	-1.13541	1.13541	0.869841	-0.869841	0.846407	-0.846407	0.827738	1
130	OG0002381	237.975	171.438	113.948	146.394	274.229	253.472	252.636	248.273	354.249	314.663	-1.21856	1.21856	0.384611	-0.384611	0.0851533	-0.0851533	0.578648	-0.578648	0.886768	1
131	OG0002382	503.506	345.809	190.31	170.226	358.409	382.038	278.199	239.84	501.528	523.653	0.559873	-0.559873	-0.320745	0.320745	0.744229	-0.744229	-0.216911	0.216911	0.353177	1
132	OG0002385	171.917	238.127	325.228	309.875	186.56	59.5882	172.502	164.855	95.2274	95.3914	0.0946958	-0.0946958	2.02065	-2.02065	0.0887984	-0.0887984	-0.00337033	0.00337033	0.163883	1
133	OG0002390	49.6831	50.1235	80.3375	71.307	275.527	275.676	256.246	254.905	146.285	95.4047	0.57725	-0.57725	-0.00261041	0.00261041	0.0254207	-0.0254207	2.04066	-2.04066	0.0992519	1
134	OG0002402	98.3447	184.058	219.786	275.28	152.117	241.887	229.743	226.027	187.281	191.777	-0.600498	0.600498	-1.22055	1.22055	0.0436723	-0.0436723	-0.063539	0.063539	0.0659357	1
135	OG0002413	660.161	433.698	465.287	405.431	500.266	514.994	268.474	253.298	399.314	310.022	0.574231	-0.574231	-0.121178	0.121178	0.242971	-0.242971	1.05153	-1.05153	0.0478994	1
136	OG0002417	433.458	404.868	777.525	717.177	790.428	851.051	952.525	805.093	784.991	712.789	0.736672	-0.736672	-0.673854	0.673854	1.53049	-1.53049	0.879563	-0.879563	0.10854	1
137	OG0002425	356.22	260.433	446.082	353.305	1329.26	1056.09	313.013	297.479	1017.25	917.338	1.0592	-1.0592	1.04516	-1.04516	0.232218	-0.232218	0.471322	-0.471322	0.00308683	1
138	OG0002426	370.603	223.087	316.22	322.708	364.135	345.366	244.012	232.844	284.095	291.805	-0.085636	0.085636	0.2231	-0.2231	0.197512	-0.197512	-0.112904	0.112904	0.415034	1
139	OG0002441	63.6917	35.286	134.127	128.044	102.549	107.793	93.3064	80.0029	229.809	149.715	0.13447	-0.13447	-0.144517	0.144517	0.44491	-0.44491	1.22319	-1.22319	0.0942749	1
140	OG0002448	55.1565	91.6702	109.2	110.956	930.015	886.329	104.913	90.0522	289.806	360.874	-0.0597125	0.0597125	0.180134	-0.180134	0.570854	-0.570854	-0.818014	0.818014	0.883288	1
141	OG0002454	110.404	193.748	364.595	416.19	214.939	198.201	229.743	187.278	140.616	156.995	-0.456012	0.456012	0.279568	-0.279568	0.702711	-0.702711	-0.379792	0.379792	0.857707	1
142	OG0002458	1025.66	33.557	612.274	8.01582	1864.03	2055.85	8.46828	130.952	2215.94	1430.54	1.27019	-1.27019	-0.0638074	0.0638074	-1.1455	1.1455	0.28084	-0.28084	0.816487	1
143	OG0002464	523.499	436.563	955.109	931.946	669.27	958.845	1371.39	1382.89	637.586	775.327	0.117025	-0.117025	-1.69572	1.69572	-0.0398124	0.0398124	-0.929455	0.929455	0.0764246	1
144	OG0002466	113.359	56.5147	169.935	161.582	115.895	80.5694	80.135	67.6252	110.464	128.517	0.134551	-0.134551	0.96015	-0.96015	0.452088	-0.452088	-0.403381	0.403381	0.206973	1
145	OG0002467	93.5666	98.9752	126.609	113.276	140.581	197.164	347.356	355.006	210.767	155.674	0.504274	-0.504274	-1.51997	1.51997	-0.0988195	0.0988195	1.36406	-1.36406	0.889171	1
146	OG0002468	118.987	121.086	475.182	381.597	162.515	144.128	486.373	470.571	470.741	470.995	1.83898	-1.83898	1.00955	-1.00955	0.278006	-0.278006	-0.00454592	0.00454592	0.0367312	1
147	OG0002469	252.225	406.131	469.443	411.338	700.638	757.236	875.683	837.015	586.915	778.04	0.492854	-0.492854	-0.290031	0.290031	0.168671	-0.168671	-1.04609	1.04609	0.501585	1
148	OG0002477	581.301	69.5272	104.253	180.356	118.71	103.719	537.891	479.14	261.875	112.284	-0.612531	0.612531	0.154383	-0.154383	0.132329	-0.132329	0.915852	-0.915852	0.528638	1
149	OG0002487	268.546	517.015	2301.87	2571.91	1834.97	1572.11	1702.66	1787.7	1156.56	1712.53	-0.306334	0.306334	0.42656	-0.42656	-0.134704	0.134704	-1.0714	1.0714	0.260666	1
150	OG0002491	977.045	291.871	873.406	865.075	288.029	360.745	1327.32	1192.2	2214.36	901.25	0.0146017	-0.0146017	-0.341525	0.341525	0.163414	-0.163414	1.28424	-1.28424	0.302112	1
151	OG0002495	327.599	289.914	322.066	284.772	338.417	352.22	270.107	267.973	606.281	645.883	1.38063	-1.38063	-0.448973	0.448973	0.0890741	-0.0890741	-0.710498	0.710498	0.82143	1
152	OG0002497	129.611	307.98	1095.84	1301.41	554.979	526.393	825.513	859.155	466.964	612.274	-0.414359	0.414359	0.127732	-0.127732	-0.0964932	0.0964932	-0.650595	0.650595	0.0772608	1
153	OG0002509	323.145	568.716	837.204	806.433	974.737	765.706	1082.68	1070.58	419.953	585.922	0.115684	-0.115684	0.74216	-0.74216	0.0347399	-0.0347399	-1.0196	1.0196	0.906165	1
154	OG0002512	223.228	186.894	135.903	124.667	345.716	334.75	158.075	127.006	156.805	151.364	0.614539	-0.614539	0.229667	-0.229667	1.55315	-1.55315	0.251589	-0.251589	0.0233066	1
155	OG0002517	51.1671	60.1678	296.541	452.048	323.416	353.01	396.913	485.6	172.362	352.753	-1.0395	1.0395	-0.218924	0.218924	-0.502869	0.502869	-1.71901	1.71901	0.0097751	1
156	OG0002522	348.568	159.372	352.134	197.231	365.167	397.951	286.825	248.094	650.086	466.355	1.19054	-1.19054	-0.18139	0.18139	0.305721	-0.305721	0.694855	-0.694855	0.0504066	1
157	OG0002526	247.719	206.591	434.23	368.521	240.04	268.831	319.914	273.204	575.174	525.319	1.06968	-1.06968	-0.739363	0.739363	1.02914	-1.02914	0.592009	-0.592009	0.154097	1
158	OG0002527	492.607	399.553	539.472	525.886	458.025	452.174	436.273	435.551	600.568	590.235	0.256094	-0.256094	0.129082	-0.129082	0.0166358	-0.0166358	0.174258	-0.174258	0.0065128	1
159	OG0002530	618.17	1133.42	736.708	775.638	575.08	595.398	770.457	827.689	628.263	811.745	-0.168508	0.168508	-0.11363	0.11363	-0.234427	0.234427	-0.834089	0.834089	0.0290215	1
160	OG0002531	499.888	434.317	704.268	633.465	1021.39	1303.6	738.621	714.499	830.056	1035.4	0.6014	-0.6014	-1.3792	1.3792	0.188617	-0.188617	-1.25079	1.25079	0.242184	1
161	OG0002539	384.983	376.921	352.725	337.086	316.243	364.156	121.849	100.815	258.384	222.58	0.339655	-0.339655	-1.05497	1.05497	1.4152	-1.4152	1.11524	-1.11524	0.288834	1
162	OG0002545	67.8671	82.0186	1308.12	1416.2	1254.49	1226.87	931.51	964.742	411.148	517.181	-0.543618	0.543618	0.152556	-0.152556	-0.240152	0.240152	-1.56515	1.56515	0.0790062	1
163	OG0002562	586.68	448.044	707.034	723.955	307.024	277.415	706.631	817.109	638.973	734.319	-0.143081	0.143081	0.61301	-0.61301	-0.877304	0.877304	-0.840089	0.840089	0.25623	1
164	OG0002568	311.085	261.25	536.113	400.582	864.123	726.468	693.772	620.854	570.085	546.507	1.54379	-1.54379	0.923382	-0.923382	0.591805	-0.591805	0.225305	-0.225305	0.00602349	1
165	OG0002569	351.489	330.548	337.886	303.55	177.491	145.987	400.362	365.947	322.183	311.354	0.909103	-0.909103	1.65398	-1.65398	0.762698	-0.762698	0.290299	-0.290299	0.00400806	1
166	OG0002587	503.738	373.986	1024.55	627.554	2537.06	2595.58	631.985	520.939	2343.86	1683.26	1.49724	-1.49724	-0.0710475	0.0710475	0.600128	-0.600128	1.0221	-1.0221	0.0177016	1
167	OG0002597	215.802	214.941	195.851	199.339	105.676	101.508	122.32	128.802	208.866	239.472	-0.245561	0.245561	0.55965	-0.55965	-0.718155	0.718155	-1.89938	1.89938	0.164195	1
168	OG0002603	198.963	167.099	530.568	559.635	237.882	233.931	370.252	355.902	244.1	231.192	-0.580705	0.580705	0.182414	-0.182414	0.430432	-0.430432	0.591509	-0.591509	0.428184	1
169	OG0002612	884.772	1436.56	411.874	506.686	4492.94	4312.79	819.07	804.729	226.648	278.556	-0.782948	0.782948	0.155177	-0.155177	0.066989	-0.066989	-0.779378	0.779378	0.116166	1
170	OG0002613	238.02	175.743	106.233	87.5454	121.677	79.1193	72.7676	63.8617	99.3603	121.227	0.678347	-0.678347	1.49083	-1.49083	0.458497	-0.458497	-0.697263	0.697263	0.181478	1
171	OG0002622	768.201	668.302	361.824	346.792	690.425	806.927	374.645	313.389	285.682	283.193	0.324037	-0.324037	-1.1885	1.1885	1.35997	-1.35997	0.0668333	-0.0668333	0.717339	1
172	OG0002623	290.629	201.799	151.415	141.54	402.53	424.94	265.81	292.763	320.602	255.364	0.321157	-0.321157	-0.258047	0.258047	-0.45976	0.45976	1.07922	-1.07922	0.510588	1
173	OG0002625	222.25	147.859	309.401	268.114	295.491	265.031	206.529	202.528	400.59	350.762	0.659012	-0.659012	0.50094	-0.50094	0.0901667	-0.0901667	0.611323	-0.611323	0.00224983	1
174	OG0002633	556.019	752.244	407.919	421.252	123.745	61.5391	1033.13	998.467	422.175	406.742	-0.0924587	0.0924587	1.93044	-1.93044	0.0980937	-0.0980937	0.107055	-0.107055	0.179491	1
175	OG0002645	1826.33	1460.4	484.482	674.807	1174.69	1490.12	786.473	746.446	717.697	766.447	-1.48339	1.48339	-1.0695	1.0695	0.235927	-0.235927	-0.296787	0.296787	0.0533445	1
176	OG0002646	124.044	105.247	249.456	205.245	157.318	163.051	379.82	356.083	190.134	196.742	1.5448	-1.5448	-0.284318	0.284318	0.512476	-0.512476	-0.271343	0.271343	0.265132	1
177	OG0002648	284.131	227.691	149.359	181.411	215.523	230.244	89.5442	92.743	66.6592	54.658	-1.13613	1.13613	-0.38719	0.38719	-0.205745	0.205745	1.15988	-1.15988	0.688714	1
178	OG0002650	87.2577	151.773	1140.67	1107.03	715.245	712.737	1289.27	1212.34	807.532	918.474	0.113581	-0.113581	0.0133288	-0.0133288	0.233352	-0.233352	-0.487742	0.487742	0.785656	1
179	OG0002654	123.302	219.375	476.063	500.47	447.521	469.767	617.085	706.605	303.141	571.531	-0.125476	0.125476	-0.121757	0.121757	-0.339519	0.339519	-1.54048	1.54048	0.0689836	1
180	OG0002656	1335.96	517.381	1035.63	850.74	1923.56	1924.93	1132.4	1042.78	1442.07	1315.32	0.455345	-0.455345	-0.00165975	0.00165975	0.191426	-0.191426	0.213555	-0.213555	0.0176564	1
181	OG0002661	167.743	212.396	453.975	488.37	613.372	665.358	769.514	803.653	412.179	645.373	-0.301664	0.301664	-0.336007	0.336007	-0.179354	0.179354	-1.82246	1.82246	0.0533629	1
182	OG0002665	256.717	116.488	207.325	184.992	295.885	277.506	90.482	94.7162	178.71	194.098	0.314228	-0.314228	0.176935	-0.176935	-0.126207	0.126207	-0.227851	0.227851	0.715599	1
183	OG0002666	699.846	1052.81	816.034	891.021	2324.54	2048.1	833.811	945.189	766.898	1123.83	-0.317681	0.317681	0.457197	-0.457197	-0.452771	0.452771	-1.36524	1.36524	0.163243	1
184	OG0002756	237.697	225.965	571.72	476.939	617.334	681.221	482.22	482.728	359.96	474.642	1.10491	-1.10491	-0.601441	0.601441	-0.00643583	0.00643583	-1.6798	1.6798	0.498944	1
185	OG0002758	650.792	805.952	558.07	518.916	409.269	384.207	799.782	703.731	404.085	399.124	0.578306	-0.578306	0.50244	-0.50244	1.01624	-1.01624	0.098255	-0.098255	0.00617098	1
186	OG0002761	102.798	91.2789	151.338	162.213	28.1538	92.2972	125.927	104.583	100.941	77.8368	-0.131387	0.131387	-2.01729	2.01729	0.350764	-0.350764	0.489561	-0.489561	0.454717	1
187	OG0002762	1169.33	732.143	137.69	186.051	332.576	284.835	229.585	199.656	574.336	528.73	-1.06989	1.06989	0.5538	-0.5538	0.499373	-0.499373	0.296109	-0.296109	0.80556	1
188	OG0002763	150.346	131.717	216.025	220.226	184.383	169.118	217.98	241.815	139.353	160.311	-0.173278	0.173278	0.777035	-0.777035	-0.932783	0.932783	-1.25846	1.25846	0.261191	1
189	OG0002764	46.1575	14.6428	275.377	227.607	682.714	702.82	239.151	192.299	255.527	274.585	0.373486	-0.373486	-0.0570686	0.0570686	0.427037	-0.427037	-0.141378	0.141378	0.194119	1
190	OG0002766	361.463	220.159	290.406	242.346	327.163	252.266	443.642	376.893	729.131	538.564	0.56907	-0.56907	0.815395	-0.815395	0.513155	-0.513155	0.948277	-0.948277	6.49667e-05	0.120513
191	OG0002770	331.542	322.33	226.29	184.906	173.989	288.369	321.795	283.79	633.897	462.715	0.675704	-0.675704	-1.6609	1.6609	0.42134	-0.42134	1.04803	-1.04803	0.787664	1
192	OG0002771	326.626	295.914	252.028	256.293	277.588	379.076	191.477	187.814	628.187	637.93	-0.10926	0.10926	-2.01236	2.01236	0.125743	-0.125743	-0.100201	0.100201	0.188115	1
193	OG0002772	468.252	377.248	396.449	357.974	139.158	231.694	483.323	465.69	395.829	420.319	0.388138	-0.388138	-1.899	1.899	0.141404	-0.141404	-0.228367	0.228367	0.315294	1
194	OG0002775	674.404	1034.92	529.128	514.708	242.22	241.458	471.715	430.887	457.409	461.721	0.135538	-0.135538	0.0154552	-0.0154552	0.44381	-0.44381	-0.0460295	0.0460295	0.125197	1
195	OG0002778	435.686	261.803	399.211	328.646	417.184	437.14	335.281	280.563	416.147	351.421	0.696849	-0.696849	-0.167896	0.167896	0.638648	-0.638648	0.606119	-0.606119	0.0220982	1
196	OG0002779	118.107	113.715	73.7914	75.7284	3673.73	3293.95	62.5712	48.2533	117.133	113.946	-0.1925	0.1925	0.809941	-0.809941	1.91982	-1.91982	0.204913	-0.204913	0.079711	1
197	OG0002783	188.14	235.748	189.123	191.325	115.855	109.373	151.175	145.84	161.255	165.945	-0.103768	0.103768	0.515846	-0.515846	0.321981	-0.321981	-0.256932	0.256932	0.385324	1
198	OG0002784	128.266	188.461	320.478	374.425	216.233	208.453	144.745	148.174	184.106	163.954	-0.768076	0.768076	0.181249	-0.181249	-0.115805	0.115805	0.572834	-0.572834	0.876445	1
199	OG0002785	590.301	490.766	187.538	185.632	345.844	421.351	141.296	118.216	239.341	227.22	0.0662321	-0.0662321	-1.27593	1.27593	1.15302	-1.15302	0.336805	-0.336805	0.850881	1
200	OG0002788	386.374	319.361	135.312	120.45	217.697	179.737	103.972	96.8707	104.43	104.662	0.816921	-0.816921	1.34282	-1.34282	0.497076	-0.497076	-0.0156475	0.0156475	0.0168689	1
201	OG0002789	385.168	285.936	304.256	293.421	130.487	147.714	122.633	111.579	152.367	160.973	0.225785	-0.225785	-0.771251	0.771251	0.587864	-0.587864	-0.342077	0.342077	0.736725	1
202	OG0002790	386.976	300.479	304.454	278.864	171.318	152.591	310.505	329.896	313.613	299.092	0.619349	-0.619349	0.81624	-0.81624	-0.427478	0.427478	0.334586	-0.334586	0.132621	1
203	OG0002793	542.148	571.97	1080.73	1081.71	1076.75	1032.41	987.179	835.584	493.596	478.941	-0.0105982	0.0105982	0.489424	-0.489424	1.93622	-1.93622	0.3508	-0.3508	0.0624349	1
204	OG0002797	381.364	345.81	155.492	156.519	395.272	418.239	189.751	171.851	219.652	203.031	-0.082346	0.082346	-0.706052	0.706052	1.23798	-1.23798	0.983362	-0.983362	0.308764	1
205	OG0002798	257.782	211.256	194.86	156.095	965.43	1118.37	126.552	107.542	116.492	84.7924	0.966081	-0.966081	-0.641949	0.641949	0.710265	-0.710265	1.37745	-1.37745	0.0989615	1
206	OG0002799	514.408	312.122	214.247	188.58	62.69	101.612	189.595	152.479	270.446	232.517	0.364449	-0.364449	-1.35504	1.35504	0.620647	-0.620647	0.431355	-0.431355	0.963885	1
207	OG0002801	220.256	215.789	333.147	365.348	280.972	287.312	480.646	473.398	275.207	346.125	-0.787041	0.787041	-0.190485	0.190485	0.129687	-0.129687	-1.94856	1.94856	0.0740929	1
208	OG0002803	235.563	127.184	177.051	130.573	140.3	165.08	117.773	110.502	372.022	339.829	0.918586	-0.918586	-0.49335	0.49335	0.19366	-0.19366	0.274961	-0.274961	0.31574	1
209	OG0002804	67.079	124.444	108.805	110.321	195.925	220.834	101.778	96.6895	80.6259	85.7861	-0.0476278	0.0476278	-0.411456	0.411456	0.176497	-0.176497	-0.213468	0.213468	0.209395	1
210	OG0002809	338.902	286.154	115.135	118.341	233.714	227.545	101.776	90.4109	188.868	140.437	-0.161272	0.161272	0.157089	-0.157089	0.694626	-0.694626	1.72749	-1.72749	0.0844264	1
211	OG0002811	215.014	237.248	143.624	118.126	121.915	186.861	143.802	119.83	174.584	156.005	0.79497	-0.79497	-1.71643	1.71643	0.742037	-0.742037	0.458619	-0.458619	0.874719	1
212	OG0002812	1611.83	2061.42	1168.37	1940.25	222.894	131.802	2014.35	2714.48	182.84	376.935	-0.987114	0.987114	1.02096	-1.02096	-0.588579	0.588579	-1.37843	1.37843	0.24206	1
213	OG0002813	1062.82	1728.91	1665.9	2243.16	965.443	1074.6	1896.58	2015.95	1154.79	1554.42	-0.970043	0.970043	-0.351486	0.351486	-0.200413	0.200413	-0.968955	0.968955	0.00483607	1
214	OG0002814	155.311	210.538	214.247	207.146	214.826	249.232	196.182	275.897	181.25	205.688	0.144652	-0.144652	-0.636431	0.636431	-1.44949	1.44949	-0.542148	0.542148	0.0360838	1
215	OG0002815	368.496	248.271	350.607	325.465	832.135	799.517	229.898	232.485	321.234	332.211	0.393977	-0.393977	0.211793	-0.211793	-0.0592769	0.0592769	-0.177967	0.177967	0.353262	1
216	OG0002817	291.555	312.776	255.393	295.109	193.355	165.912	276.944	271.59	150.612	197.984	-0.871544	0.871544	0.92278	-0.92278	0.11792	-0.11792	-1.64166	1.64166	0.389293	1
217	OG0002818	408.455	358.333	118.696	102.518	148.24	236.922	186.457	173.288	143.793	134.141	0.607656	-0.607656	-1.91311	1.91311	0.304178	-0.304178	0.288564	-0.288564	0.680665	1
218	OG0002825	685.397	607.385	764.601	622.489	999.128	970.081	620.694	596.465	776.742	789.632	1.78531	-1.78531	0.257037	-0.257037	0.346878	-0.346878	-0.143408	0.143408	0.108678	1
219	OG0002826	480.219	38.677	257.175	227.609	159.585	229.255	249.656	212.216	713.253	282.862	0.132516	-0.132516	-0.389317	0.389317	0.17613	-0.17613	0.938812	-0.938812	0.309713	1
220	OG0002828	102.474	121.967	85.2654	101.041	109.973	140.847	315.677	304.055	180.929	165.941	-1.00284	1.00284	-1.4578	1.4578	0.222093	-0.222093	0.511711	-0.511711	0.24521	1
221	OG0002829	690.276	433.077	294.366	274.436	235.162	248.565	318.658	331.866	452.968	451.125	0.317423	-0.317423	-0.25102	0.25102	-0.183923	0.183923	0.0184672	-0.0184672	0.792994	1
222	OG0002831	709.938	1070.59	65.4807	75.0976	105.545	113.298	66.8775	55.1256	67.6147	74.8525	-0.598342	0.598342	-0.30988	0.30988	0.8425	-0.8425	-0.44435	0.44435	0.603017	1
223	OG0002833	99.2725	143.62	280.123	334.766	1126.09	706.488	568.002	586.057	499.627	668.403	-0.556423	0.556423	1.43365	-1.43365	-0.0979547	0.0979547	-0.904743	0.904743	0.934224	1
224	OG0002836	209.295	120.788	486.458	482.004	2935.27	2865.81	612.917	650.544	620.559	810.165	0.0324343	-0.0324343	0.0844268	-0.0844268	-0.20999	0.20999	-0.934441	0.934441	0.172735	1
225	OG0002837	121.214	220.78	412.912	462.761	550.835	487.094	1177.52	1220.8	298.694	457.753	-0.327083	0.327083	0.352855	-0.352855	-0.10369	0.10369	-1.20816	1.20816	0.214575	1
226	OG0002838	270.355	353.669	345.01	325.691	235.209	222.876	146.94	144.048	95.8623	109.634	0.394668	-0.394668	0.368874	-0.368874	0.136211	-0.136211	-0.918235	0.918235	0.983868	1
227	OG0002840	413.141	212.853	317.457	266.25	238.198	223.952	249.813	195.173	297.427	219.93	0.482875	-0.482875	0.169669	-0.169669	0.675867	-0.675867	0.824498	-0.824498	0.00168833	1
228	OG0002841	661.041	604.06	348.769	325.062	165.429	185.427	198.064	179.207	493.846	484.231	0.781938	-0.781938	-1.26677	1.26677	1.11086	-1.11086	0.218502	-0.218502	0.590832	1
229	OG0002843	443.154	433.469	1080.34	1160.39	445.047	448.949	406.95	420.481	269.814	286.833	-1.48069	1.48069	-0.180885	0.180885	-0.677783	0.677783	-1.26719	1.26719	0.00490514	1
230	OG0002844	724.968	670.714	278.736	264.733	179.549	86.8804	275.533	243.787	187.246	204.383	0.1523	-0.1523	2.05586	-2.05586	0.361327	-0.361327	-0.258646	0.258646	0.159773	1
231	OG0002849	1172.81	357.29	1038.98	975.605	1741.07	2188.54	511.389	509.283	2062.63	1579.25	0.118773	-0.118773	-0.429953	0.429953	0.00779031	-0.00779031	0.50114	-0.50114	0.727662	1
232	OG0002850	732.006	1143	615.637	871.406	193.774	135.157	509.664	546.052	128.878	232.517	-0.830918	0.830918	0.860902	-0.860902	-0.166513	0.166513	-1.38541	1.38541	0.307894	1
233	OG0002852	68.4707	48.7868	122.059	125.511	386.935	309.776	110.243	110.325	95.2274	82.1426	-0.137772	0.137772	1.0944	-1.0944	-0.0036626	0.0036626	0.729003	-0.729003	0.0900114	1
234	OG0002853	695.345	728.413	658.764	682.61	852.362	867.481	440.508	374.558	364.404	382.559	-0.419784	0.419784	-0.20758	0.20758	1.91063	-1.91063	-0.573947	0.573947	0.681912	1
235	OG0002857	211.302	190.71	737.825	615.766	434.236	343.509	603.031	564.527	1048.14	820.128	0.952332	-0.952332	1.23199	-1.23199	0.348289	-0.348289	1.28892	-1.28892	0.000761426	1
236	OG0002858	364.896	527.421	481.709	463.863	427.457	819.51	463.717	491.514	525.979	625.344	0.106744	-0.106744	-1.77822	1.77822	-0.164586	0.164586	-0.488124	0.488124	0.0963815	1
237	OG0002860	162.177	130.804	148.568	144.283	310.901	295.919	109.304	95.2544	128.874	123.545	0.234976	-0.234976	0.396463	-0.396463	1.10282	-1.10282	0.339014	-0.339014	0.00999216	1
238	OG0002862	72.5051	50.3195	110.192	104.414	93.3111	64.5466	559.22	591.975	85.7047	94.729	0.216046	-0.216046	1.4624	-1.4624	-0.228347	0.228347	-0.401394	0.401394	0.412025	1
239	OG0002866	111.547	36.7203	270.034	185.418	272.688	313.603	35.7565	54.7148	431.38	420.65	0.677731	-0.677731	-0.25458	0.25458	-0.764431	0.764431	0.0459428	-0.0459428	0.740688	1
240	OG0002869	547.389	547.447	134.522	156.521	157.705	168.055	294.35	286.118	193.315	211.319	-1.69931	1.69931	-0.714223	0.714223	0.318799	-0.318799	-1.00029	1.00029	0.0399837	1
241	OG0002873	97.2314	45.1989	161.623	159.473	126.137	155.638	75.1152	80.9034	205.056	236.819	0.0365538	-0.0365538	-0.571528	0.571528	-0.202523	0.202523	-0.392397	0.392397	0.0220742	1
242	OG0002874	468.761	380.28	116.496	105.391	302.427	273.439	139.258	130.775	119.352	142.759	0.673347	-0.673347	0.677243	-0.677243	0.422646	-0.422646	-1.20147	1.20147	0.670452	1
243	OG0002878	287.658	351.224	239.173	303.755	425.293	441.214	241.348	249.349	220.61	261.008	-1.41752	1.41752	-0.218954	0.218954	-0.194327	0.194327	-0.999572	0.999572	0.0160428	1
[truncated: 1,623 more rows]

## Sheet: Polistes_Swarm
	Row.names	P_can Queen	P_can Worker	A_pal Queen.x	A_pal Worker.x	A_caj Queen.x	A_caj Worker.x	P_qua Queen.x	P_qua Worker.x	M_cin Queen.x	M_cin Worker.x	A_pal Queen.y	A_pal Worker.y	A_caj Queen.y	A_caj Worker.y	P_qua Queen.y	P_qua Worker.y	M_cin Queen.y	M_cin Worker.y	p.coeffs	q.coeffs
[truncated: 2,191 more rows]

[truncated: 7 more sheets: Mischoocyttarus_Swarm, Agelaia_Independant, Angiopolybia_Independant, Metapolybia_Independant, Polybia_Independant, Vespula_Polistinae, Vespa_Polistinae]
