# Supplementary material for: Social complexity, life-history and lineage influence the molecular basis of caste in a major transition in evolution
Source: Research Square preprint supplement (doi:10.21203/rs.3.rs-835604/v1), 2021-08-27
Supplement: Supplementary file 7 [file e7ef0817d876bea9e6cb9c65.xlsx]

## Sheet: Samples and Merged RNAseq files
species	collection site	wasp ID	Nest ID	caste	sequencing pool	RNAseq name	GEO ascencion	Sample Name on SRA	Number of Reads	Fastq Sequence Name (first read pair)
Agelaia cajennsis	Gamboa, Panama	007_06	2013007	Q	Q1	AGQ	GSM4851952	Agelaia_Queen	34012350	AGQ_GTGAAA_L004_R1_001.fastq.gz
Agelaia cajennsis	Gamboa, Panama	007_15	2013007	Q	Q1	AGQ	GSM4851952	Agelaia_Queen	34012350	AGQ_GTGAAA_L004_R1_001.fastq.gz
Agelaia cajennsis	Gamboa, Panama	007_17	2013007	Q	Q1	AGQ	GSM4851952	Agelaia_Queen	34012350	AGQ_GTGAAA_L004_R1_001.fastq.gz
Agelaia cajennsis	Gamboa, Panama	007_27	2013007	Q	Q1	AGQ	GSM4851952	Agelaia_Queen	34012350	AGQ_GTGAAA_L004_R1_001.fastq.gz
Agelaia cajennsis	Gamboa, Panama	007_03	2013007	W	W1	AGW	GSM4851953	Agelaia_Worker	31144519	AGW_GTGGCC_L004_R1_001.fastq.gz
Agelaia cajennsis	Gamboa, Panama	007_19	2013007	W	W1	AGW	GSM4851953	Agelaia_Worker	31144519	AGW_GTGGCC_L004_R1_001.fastq.gz
Agelaia cajennsis	Gamboa, Panama	007_22	2013007	W	W1	AGW	GSM4851953	Agelaia_Worker	31144519	AGW_GTGGCC_L004_R1_001.fastq.gz
Agelaia cajennsis	Gamboa, Panama	007_28	2013007	W	W1	AGW	GSM4851953	Agelaia_Worker	31144519	AGW_GTGGCC_L004_R1_001.fastq.gz
Mischcyttarus basimacula	Gamboa, Panama	002_03	2013002	Q	Q1	MCQ	GSM4851954	Mischocyttarus_Queen	36631861	MCQ_AGTCAA_L004_R1_001.fastq.gz
Mischcyttarus basimacula	Gamboa, Panama	003_03	2013003	Q	Q1	MCQ	GSM4851954	Mischocyttarus_Queen	36631861	MCQ_AGTCAA_L004_R1_001.fastq.gz
Mischcyttarus basimacula	Gamboa, Panama	004_01	2013004	Q	Q1	MCQ	GSM4851954	Mischocyttarus_Queen	36631861	MCQ_AGTCAA_L004_R1_001.fastq.gz
Mischcyttarus basimacula	Gamboa, Panama	004_05	2013004	Q	Q1	MCQ	GSM4851954	Mischocyttarus_Queen	36631861	MCQ_AGTCAA_L004_R1_001.fastq.gz
Mischcyttarus basimacula	Gamboa, Panama	004_12	2013004	Q	Q1	MCQ	GSM4851954	Mischocyttarus_Queen	36631861	MCQ_AGTCAA_L004_R1_001.fastq.gz
Mischcyttarus basimacula	Gamboa, Panama	002_01	2013002	W	W1	MCW	GSM4851955	Mischocyttarus_Worker	37227319	MCW_CTTGTA_L004_R1_001.fastq.gz
Mischcyttarus basimacula	Gamboa, Panama	003_02	2013003	W	W1	MCW	GSM4851955	Mischocyttarus_Worker	37227319	MCW_CTTGTA_L004_R1_001.fastq.gz
Mischcyttarus basimacula	Gamboa, Panama	004_04	2013004	W	W1	MCW	GSM4851955	Mischocyttarus_Worker	37227319	MCW_CTTGTA_L004_R1_001.fastq.gz
Mischcyttarus basimacula	Gamboa, Panama	004_07	2013004	W	W1	MCW	GSM4851955	Mischocyttarus_Worker	37227319	MCW_CTTGTA_L004_R1_001.fastq.gz
Mischcyttarus basimacula	Gamboa, Panama	004_10	2013004	W	W1	MCW	GSM4851955	Mischocyttarus_Worker	37227319	MCW_CTTGTA_L004_R1_001.fastq.gz
Polybia quadricincta	Arima Valley, Trinidad	AW3_1	AW3	Q	Q1	PaccQ2	GSM4851948	Queen2_PaccQ2	48961958	PaccQ2_ATCACG_L001_R1_001.fastq.gz
Polybia quadricincta	Arima Valley, Trinidad	AW3_44	AW3	Q	Q1	PaccQ2	GSM4851948	Queen2_PaccQ2	48961958	PaccQ2_ATCACG_L001_R1_001.fastq.gz
Polybia quadricincta	Arima Valley, Trinidad	AW3_166	AW3	Q	Q1	PaccQ2	GSM4851948	Queen2_PaccQ2	48961958	PaccQ2_ATCACG_L001_R1_001.fastq.gz
Polybia quadricincta	Arima Valley, Trinidad	AW3_337	AW3	Q	Q1	PaccQ2	GSM4851948	Queen2_PaccQ2	48961958	PaccQ2_ATCACG_L001_R1_001.fastq.gz
Polybia quadricincta	Arima Valley, Trinidad	AW3_14	AW3	Q	Q2	PaccQ2	GSM4851948	Queen2_PaccQ2	48961958	PaccQ2_ATCACG_L001_R1_001.fastq.gz
Polybia quadricincta	Arima Valley, Trinidad	AW3_106	AW3	Q	Q2	PaccQ2	GSM4851948	Queen2_PaccQ2	48961958	PaccQ2_ATCACG_L001_R1_001.fastq.gz
Polybia quadricincta	Arima Valley, Trinidad	AW3_289	AW3	Q	Q2	PaccQ2	GSM4851948	Queen2_PaccQ2	48961958	PaccQ2_ATCACG_L001_R1_001.fastq.gz
Polybia quadricincta	Arima Valley, Trinidad	AW3_394	AW3	Q	Q2	PaccQ2	GSM4851948	Queen2_PaccQ2	48961958	PaccQ2_ATCACG_L001_R1_001.fastq.gz
Polybia quadricincta	Arima Valley, Trinidad	AW3_27	AW3	Q	Q3	PaccQ2	GSM4851948	Queen2_PaccQ2	48961958	PaccQ2_ATCACG_L001_R1_001.fastq.gz
Polybia quadricincta	Arima Valley, Trinidad	AW3_127	AW3	Q	Q3	PaccQ2	GSM4851948	Queen2_PaccQ2	48961958	PaccQ2_ATCACG_L001_R1_001.fastq.gz
Polybia quadricincta	Arima Valley, Trinidad	AW3_293	AW3	Q	Q3	PaccQ2	GSM4851948	Queen2_PaccQ2	48961958	PaccQ2_ATCACG_L001_R1_001.fastq.gz
Polybia quadricincta	Arima Valley, Trinidad	AW3_2	AW3	W	W1	PaccW1	GSM4851949	Worker1_PaccW1	43732047	PaccW1_ACTTGA_L001_R1_001.fastq.gz
Polybia quadricincta	Arima Valley, Trinidad	AW3_90	AW3	W	W1	PaccW1	GSM4851949	Worker1_PaccW1	43732047	PaccW1_ACTTGA_L001_R1_001.fastq.gz
Polybia quadricincta	Arima Valley, Trinidad	AW3_174	AW3	W	W1	PaccW1	GSM4851949	Worker1_PaccW1	43732047	PaccW1_ACTTGA_L001_R1_001.fastq.gz
Polybia quadricincta	Arima Valley, Trinidad	AW3_313	AW3	W	W1	PaccW1	GSM4851949	Worker1_PaccW1	43732047	PaccW1_ACTTGA_L001_R1_001.fastq.gz
Polybia quadricincta	Arima Valley, Trinidad	AW3_34	AW3	W	W2	PaccW1	GSM4851949	Worker1_PaccW1	43732047	PaccW1_ACTTGA_L001_R1_001.fastq.gz
Polybia quadricincta	Arima Valley, Trinidad	AW3_109	AW3	W	W2	PaccW1	GSM4851949	Worker1_PaccW1	43732047	PaccW1_ACTTGA_L001_R1_001.fastq.gz
Polybia quadricincta	Arima Valley, Trinidad	AW3_210	AW3	W	W2	PaccW1	GSM4851949	Worker1_PaccW1	43732047	PaccW1_ACTTGA_L001_R1_001.fastq.gz
Polybia quadricincta	Arima Valley, Trinidad	AW3_375	AW3	W	W2	PaccW1	GSM4851949	Worker1_PaccW1	43732047	PaccW1_ACTTGA_L001_R1_001.fastq.gz
Polybia quadricincta	Arima Valley, Trinidad	AW3_65	AW3	W	W3	PaccW1	GSM4851949	Worker1_PaccW1	43732047	PaccW1_ACTTGA_L001_R1_001.fastq.gz
Polybia quadricincta	Arima Valley, Trinidad	AW3_151	AW3	W	W3	PaccW1	GSM4851949	Worker1_PaccW1	43732047	PaccW1_ACTTGA_L001_R1_001.fastq.gz
Polybia quadricincta	Arima Valley, Trinidad	AW3_247	AW3	W	W3	PaccW1	GSM4851949	Worker1_PaccW1	43732047	PaccW1_ACTTGA_L001_R1_001.fastq.gz
Angiopolybia pallens	Arima Valley, Trinidad	AW1_29	AW1	Q	Q1	ApallQ1	GSM4851956	Angiopolybia Queen	39393919	ApallQ1_TAGCTT_L001_R1_001.fastq.gz
Angiopolybia pallens	Arima Valley, Trinidad	AW1_95	AW1	Q	Q1	ApallQ1	GSM4851956	Angiopolybia Queen	39393919	ApallQ1_TAGCTT_L001_R1_001.fastq.gz
Angiopolybia pallens	Arima Valley, Trinidad	AW1_174	AW1	Q	Q1	ApallQ1	GSM4851956	Angiopolybia Queen	39393919	ApallQ1_TAGCTT_L001_R1_001.fastq.gz
Angiopolybia pallens	Arima Valley, Trinidad	DH1_38	DH1	Q	Q1	ApallQ1	GSM4851956	Angiopolybia Queen	39393919	ApallQ1_TAGCTT_L001_R1_001.fastq.gz
Angiopolybia pallens	Arima Valley, Trinidad	AW1_78	AW1	Q	Q2	ApallQ1	GSM4851956	Angiopolybia Queen	39393919	ApallQ1_TAGCTT_L001_R1_001.fastq.gz
Angiopolybia pallens	Arima Valley, Trinidad	AW1_147	AW1	Q	Q2	ApallQ1	GSM4851956	Angiopolybia Queen	39393919	ApallQ1_TAGCTT_L001_R1_001.fastq.gz
Angiopolybia pallens	Arima Valley, Trinidad	DH1_35	DH1	Q	Q2	ApallQ1	GSM4851956	Angiopolybia Queen	39393919	ApallQ1_TAGCTT_L001_R1_001.fastq.gz
Angiopolybia pallens	Arima Valley, Trinidad	DH1_44	DH1	Q	Q2	ApallQ1	GSM4851956	Angiopolybia Queen	39393919	ApallQ1_TAGCTT_L001_R1_001.fastq.gz
Angiopolybia pallens	Arima Valley, Trinidad	AW1_2	AW1	W	W1	ApallW1	GSM4851957	Angiopolybia Worker	41837397	ApallW1_GGCTAC_L001_R1_001.fastq.gz
Angiopolybia pallens	Arima Valley, Trinidad	AW1_86	AW1	W	W1	ApallW1	GSM4851957	Angiopolybia Worker	41837397	ApallW1_GGCTAC_L001_R1_001.fastq.gz
Angiopolybia pallens	Arima Valley, Trinidad	DH1_3	DH1	W	W1	ApallW1	GSM4851957	Angiopolybia Worker	41837397	ApallW1_GGCTAC_L001_R1_001.fastq.gz
Angiopolybia pallens	Arima Valley, Trinidad	DH1_65	DH1	W	W1	ApallW1	GSM4851957	Angiopolybia Worker	41837397	ApallW1_GGCTAC_L001_R1_001.fastq.gz
Angiopolybia pallens	Arima Valley, Trinidad	AW1_30	AW1	W	W2	ApallW1	GSM4851957	Angiopolybia Worker	41837397	ApallW1_GGCTAC_L001_R1_001.fastq.gz
Angiopolybia pallens	Arima Valley, Trinidad	AW1_121	AW1	W	W2	ApallW1	GSM4851957	Angiopolybia Worker	41837397	ApallW1_GGCTAC_L001_R1_001.fastq.gz
Angiopolybia pallens	Arima Valley, Trinidad	DH1_24	DH1	W	W2	ApallW1	GSM4851957	Angiopolybia Worker	41837397	ApallW1_GGCTAC_L001_R1_001.fastq.gz
Angiopolybia pallens	Arima Valley, Trinidad	DH1_75	DH1	W	W2	ApallW1	GSM4851957	Angiopolybia Worker	41837397	ApallW1_GGCTAC_L001_R1_001.fastq.gz
Angiopolybia pallens	Arima Valley, Trinidad	AW1_51	AW1	W	W3	ApallW1	GSM4851957	Angiopolybia Worker	41837397	ApallW1_GGCTAC_L001_R1_001.fastq.gz
Angiopolybia pallens	Arima Valley, Trinidad	AW1_139	AW1	W	W3	ApallW1	GSM4851957	Angiopolybia Worker	41837397	ApallW1_GGCTAC_L001_R1_001.fastq.gz
Angiopolybia pallens	Arima Valley, Trinidad	DH1_51	DH1	W	W3	ApallW1	GSM4851957	Angiopolybia Worker	41837397	ApallW1_GGCTAC_L001_R1_001.fastq.gz
Angiopolybia pallens	Arima Valley, Trinidad	DH1_88	DH1	W	W3	ApallW1	GSM4851957	Angiopolybia Worker	41837397	ApallW1_GGCTAC_L001_R1_001.fastq.gz
Polistes canadensis	Galeta, Panama	Y78	1209	Q	Q1	QueenPool	GSM4851958	Polistes_queen_1	24557891	QueenPool1_output_forward_paired.fastq.gz
Polistes canadensis	Galeta, Panama	B13	1246	Q	Q1	QueenPool	GSM4851959	Polistes_queen_2	54602368	QueenPool2_output_forward_paired.fastq.gz
Polistes canadensis	Galeta, Panama	G56	1248	Q	Q1	QueenPool	GSM4851960	Polistes_queen_3	22620222	QueenPool3_output_forward_paired.fastq.gz
Polistes canadensis	Galeta, Panama	YPGP	13022	W	W1	WorkerPool	GSM4851961	Polistes_worker_1	24599066	WorkerPool1_output_forward_paired.fastq.gz
Polistes canadensis	Galeta, Panama	WYYB	13005	W	W1	WorkerPool	GSM4851962	Polistes_worker_2	24922698	WorkerPool2_output_forward_paired.fastq.gz
Polistes canadensis	Galeta, Panama	PGBY	13013	W	W1	WorkerPool	GSM4851963	Polistes_worker_3	21660398	WorkerPool3_output_forward_paired.fastq.gz
Vespa crabro	London, UK	VC		W	W1	Non-reproductive	GSM4851932	Worker_VC1	36198047	VC_1.fq.gz
Vespa crabro	London, UK	VC_W1		W	W1	Non-reproductive	GSM4851933	Worker_W1	26646023	VC_W1_1.fq.gz
Vespa crabro	London, UK	VC_W3		W	W1	Non-reproductive	GSM4851934	Worker_W3	30490381	VC_W3_1.fq.gz
Vespa crabro	London, UK	VC_W5		W	W1	Non-reproductive	GSM4851935	Worker_W5	27225375	VC_W5_1.fq.gz
Vespa crabro	London, UK	VC_W6		W	W1	Non-reproductive	GSM4851936	Worker_W6	28293264	VC_W6_1.fq.gz
Vespa crabro	London, UK	VC_W7		W	W1	Non-reproductive	GSM4851937	Worker_W7	22959684	VC_W7_1.fq.gz
Vespa crabro	London, UK	VCQ2		Q	Q1	Reproductive	GSM4851931	Queen_VCQ2	26556932	VCQ2_1.fq.gz
Vespula vulgaris	London, UK	VvulW1		W	W1	Worker_Pool	GSM4851938	Worker1_VvulW1	27423035	VvulW1_1.fq.gz
Vespula vulgaris	London, UK	VvulW2		W	W1	Worker_Pool	GSM4851939	Worker2_VvulW2	27129008	VvulW2_1.fq.gz
Vespula vulgaris	London, UK	VvulW3		W	W1	Worker_Pool	GSM4851940	Worker3_VvulW3	26074354	VvulW3_1.fq.gz
Vespula vulgaris	London, UK	VvulW4		W	W1	Worker_Pool	GSM4851941	Worker4_VvulW4	28216903	VvulW4_1.fq.gz
Vespula vulgaris	London, UK	VvulW5		W	W1	Worker_Pool	GSM4851942	Worker5_VvulW5	25568910	VvulW5_1.fq.gz
Vespula vulgaris	London, UK	MH1Q		Q	Q1	Queen_Pool	GSM4851943	Queen_MH1Q	37825407	MH1Q_1.fq.gz
Vespula vulgaris	London, UK	MH2Q		Q	Q1	Queen_Pool	GSM4851944	Queen_MH2Q	38147128	MH2Q_1.fq.gz
Vespula vulgaris	London, UK	MH5Q		Q	Q1	Queen_Pool	GSM4851945	Queen_MH5Q	36991531	MH5Q_1.fq.gz
Vespula vulgaris	London, UK	RHSQ		Q	Q1	Queen_Pool	GSM4851946	Queen_RHSQ	32202729	RHSQ_1.fq.gz
Vespula vulgaris	London, UK	VHQ		Q	Q1	Queen_Pool	GSM4851947	Queen_VHQ	34955447	VHQ_1.fq.gz
Brachygastra mellifica	Texas, USA	1105	TR1	Q	Q1	BMQueen	GSM4851950	BMQueen	13867248	BMQueen_ACTTGA_R1_001.fastq.gz
Brachygastra mellifica	Texas, USA	1205	TR1	Q	Q1	BMQueen	GSM4851950	BMQueen	13867248	BMQueen_ACTTGA_R1_001.fastq.gz
Brachygastra mellifica	Texas, USA	2027	TR2	Q	Q1	BMQueen	GSM4851950	BMQueen	13867248	BMQueen_ACTTGA_R1_001.fastq.gz
Brachygastra mellifica	Texas, USA	2138	TR2	Q	Q1	BMQueen	GSM4851950	BMQueen	13867248	BMQueen_ACTTGA_R1_001.fastq.gz
Brachygastra mellifica	Texas, USA	3226	TR3	Q	Q1	BMQueen	GSM4851950	BMQueen	13867248	BMQueen_ACTTGA_R1_001.fastq.gz
Brachygastra mellifica	Texas, USA	4279	TR4	Q	Q1	BMQueen	GSM4851950	BMQueen	13867248	BMQueen_ACTTGA_R1_001.fastq.gz
Brachygastra mellifica	Texas, USA	1007	TR1	W	W1	BMWorker	GSM4851951	BMWorker	23618920	BMWorker_TAGCTT_R1_001.fastq.gz
Brachygastra mellifica	Texas, USA	1062	TR1	W	W1	BMWorker	GSM4851951	BMWorker	23618920	BMWorker_TAGCTT_R1_001.fastq.gz
Brachygastra mellifica	Texas, USA	2001	TR2	W	W1	BMWorker	GSM4851951	BMWorker	23618920	BMWorker_TAGCTT_R1_001.fastq.gz
Brachygastra mellifica	Texas, USA	2127	TR2	W	W1	BMWorker	GSM4851951	BMWorker	23618920	BMWorker_TAGCTT_R1_001.fastq.gz
Brachygastra mellifica	Texas, USA	3002	TR3	W	W1	BMWorker	GSM4851951	BMWorker	23618920	BMWorker_TAGCTT_R1_001.fastq.gz
Brachygastra mellifica	Texas, USA	4054	TR4	W	W1	BMWorker	GSM4851951	BMWorker	23618920	BMWorker_TAGCTT_R1_001.fastq.gz
Metapolybia cingulata	Gamboa, Panama	005_23	2013005	Q	Q1	MPQ	GSM4851964	Metapolybia_Queen	28689283	MPQ_CCGTCC_L004_R1_001.fastq.gz
Metapolybia cingulata	Arima Valley, Trinidad	040_139	2013040	Q	Q1	MPQ	GSM4851964	Metapolybia_Queen	28689283	MPQ_CCGTCC_L004_R1_001.fastq.gz
Metapolybia cingulata	Arima Valley, Trinidad	015_176	2013015	Q	Q1	MPQ	GSM4851964	Metapolybia_Queen	28689283	MPQ_CCGTCC_L004_R1_001.fastq.gz
Metapolybia cingulata	Arima Valley, Trinidad	039_129	2013039	Q	Q1	MPQ	GSM4851964	Metapolybia_Queen	28689283	MPQ_CCGTCC_L004_R1_001.fastq.gz
Metapolybia cingulata	Arima Valley, Trinidad	014_134	2013014	Q	Q1	MPQ	GSM4851964	Metapolybia_Queen	28689283	MPQ_CCGTCC_L004_R1_001.fastq.gz
Metapolybia cingulata	Arima Valley, Trinidad	016_020	2013016	Q	Q1	MPQ	GSM4851964	Metapolybia_Queen	28689283	MPQ_CCGTCC_L004_R1_001.fastq.gz
Metapolybia cingulata	Gamboa, Panama	005_13	2013005	W	W1	MPW	GSM4851965	Metapolybia_Worker	26546200	MPW_ATGTCA_L004_R1_001.fastq.gz
Metapolybia cingulata	Arima Valley, Trinidad	040_050	2013040	W	W1	MPW	GSM4851965	Metapolybia_Worker	26546200	MPW_ATGTCA_L004_R1_001.fastq.gz
Metapolybia cingulata	Arima Valley, Trinidad	015_217	2013015	W	W1	MPW	GSM4851965	Metapolybia_Worker	26546200	MPW_ATGTCA_L004_R1_001.fastq.gz
Metapolybia cingulata	Arima Valley, Trinidad	039_118	2013039	W	W1	MPW	GSM4851965	Metapolybia_Worker	26546200	MPW_ATGTCA_L004_R1_001.fastq.gz
Metapolybia cingulata	Arima Valley, Trinidad	014_24	2013014	W	W1	MPW	GSM4851965	Metapolybia_Worker	26546200	MPW_ATGTCA_L004_R1_001.fastq.gz
Metapolybia cingulata	Arima Valley, Trinidad	016_031	2013016	W	W1	MPW	GSM4851965	Metapolybia_Worker	26546200	MPW_ATGTCA_L004_R1_001.fastq.gz

## Sheet: Trinity assembly stats
################################	Agelaia	Angiopolybia	Brachygastra	Metapolybia	Mischocyttarus	Polistes	Polybia	Vespa	Vespula
## Counts of transcripts, etc.
################################
Total trinity 'genes':	125586	123471	169663	134683	153774	155828	124443	196417	132677
Total trinity transcripts:	221348	224253	293841	220093	266791	300170	213599	306987	207358
Percent GC:	33.59	34.46	36.13	34.35	33.92	33.25	34.78	34.16	34.65
########################################
Stats based on ALL transcript contigs:
########################################
Contig N10:	8962	8662	4132	8038	6726	8459	7723	9510	9988
Contig N20:	6749	6509	3011	6126	4985	6323	5720	6855	7602
Contig N30:	5321	5325	2306	4837	3890	5022	4539	5239	6125
Contig N40:	4288	4385	1770	3847	3069	4050	3646	4025	5005
Contig N50:	3453	3576	1329	3003	2388	3228	2894	3024	4015
Median contig length:	831	886	456	634	627	718	753	672	762
Average contig:	1706.08	1768.69	810.62	1405.68	1232.88	1523.65	1484.6	1457.69	1825.44
Total assembled bases:	377636547	396634078	238194533	309380097	328920666	457354766	317108781	447490908	378519699
#####################################################
## Stats based on ONLY LONGEST ISOFORM per 'GENE':
#####################################################
Contig N10:	5354	5502	3301	4891	4063	5064	4875	6428	7624
Contig N20:	3537	3651	2011	3101	2622	3235	3245	3921	5168
Contig N30:	2483	2605	1294	2104	1843	2232	2338	2504	3601
Contig N40:	1815	1930	897	1467	1355	1619	1730	1635	2457
Contig N50:	1339	1441	669	1057	1033	1217	1290	1132	1593
Median contig length:	510	500	362	434	465	512	501	531	536
Average contig:	874.5	892.13	561.92	741.27	744.28	841.76	848.6	892.39	1015.99
Total assembled bases:	109824778	110151839	95337385	99836748	114451631	131169295	105602876	175280350	134798915
